# Supplementary material
Source: PubMed Central journal article supplement (PMC7815290)
Supplement: NIHMS1660373-supplement-Supplemental_Material.pdf [file NIHMS1660373-supplement-Supplemental_Material.pdf]

## Supplemental Materials

### Supplemental Methods

**Animals:** Three- to four-months old male and female C57BL/6 (C57) mice were used in this study. The facility monitors and maintains temperature, humidity, and a 12 h light/dark cycle. A maximum of 5 mice were housed in a cage with an individual ventilating system and irradiated bedding (1/8-inch Bed O's Cobs, The Anderson, Maumee, OH). Sterilized food (PicoLab Rodent diet 5053, LabDiet, St. Louis, MO) and water were freely accessible in their cages. Experiments were initiated in 3-4-month-old male/female C57BL/6 mice (Jackson Laboratories, Bar Harbor, ME).

**Transient middle cerebral artery occlusion (MCAO):** According to our published studies<sup>1,2</sup>, mice were anesthetized with a mixture of isoflurane/oxygen/nitrogen and a 6-0 Teflon-coated black monofilament surgical suture (Doccol, Redland, CA) was inserted into the exposed external carotid artery, advanced into the internal carotid artery, and wedged into the Circle of Willis to obstruct the origin of MCA. The filament was left in place during a 30 min ischemic period and then withdrawn. Cerebral blood flow (CBF) was measured prior to stroke, during the occlusion period, and 10 min after reperfusion by Laser-Doppler flowmetry (Periflux System 5010; Perimed, Järfälla, Sweden). Animals exhibiting greater than 80% reduction of pre-ischemic baseline CBF during MCAO and CBF greater than 80% of baseline blood flow by 10 min of reperfusion were included in the study. Body temperature was maintained at  $37 \pm 0.5^\circ\text{C}$  during the entire surgical procedure via a rectal probe connected to a thermocoupler-regulated heating water coil in the surgical board. Mice were then placed in a recovery cage, where their body temperatures were maintained at  $37 \pm 0.5^\circ\text{C}$  until they regained consciousness and resumed activity. The mice were then returned to their home cages with their cage mates. Warm saline was administered subcutaneously to prevent dehydration during the acute phase. Softened food and hydrogel (Clear H<sub>2</sub>O) were given during the first week of recovery. Mice typically started to regain body weight around days 3-5 and continued to recover from stroke.

**Tissue collection and total RNA extraction:** Mice were randomly assigned to 10 different post-stroke survival times (pre-stroke [naïve], acute [1h, 3h, 6h, 1d, 3d], subacute [1w, 2w], recovery [1m, 2m, 6m]), and their brains were collected and stored at  $-80^\circ\text{C}$  for RNA extraction. The brain block containing the entire infarct region (+3.1mm to -4.1mm from bregma) was cryosectioned, cut in half and collected for contralateral and ipsilateral hemispheres according to a method described previously<sup>1</sup>. Total RNA was extracted using Tri reagent (MRC, OH). After homogenization of brain tissue in 1 ml of Tri reagent, 240  $\mu\text{l}$  of chloroform was added, mixed, homogenized, and then centrifuged at 10,000 rpm for 10 min at  $4^\circ\text{C}$ . The upper layer was transferred into a clean tube and 2 volumes of 100% cold ethanol was added. The mixture was kept in  $-20^\circ\text{C}$  for at least 1 h to precipitate RNA and centrifuged at 10,000 rpm for 10 min at  $4^\circ\text{C}$ . The precipitate was dried for 10 min at room temperature and then resolved in diethyl pyrocarbonate-treated water. The RNA concentration and purity were determined by measuring the absorbance at 260nm and 280nm. The RNA was stored at  $-80^\circ\text{C}$  until RNA seq analysis.

**RNA-seq data generation:** Strand-specific RNA-seq libraries were prepared from 500 ng RNA using KAPA stranded mRNA-Seq Kit (KAPA Biosystems). The libraries were amplified by twelve-cycle PCR. Sequencing was performed on Illumina HiSeq®2000 (Illumina) by multiplexed single-read run with 33 cycles. The resulting FASTQ files were analyzed via FastQC to ensure sufficient data quality. The reads were mapped to the mouse genome (mm10) using commercial

software ArrayStudio (OmicSoft) with two mismatches allowed. In our samples, 83%-90% of the reads were uniquely mapped.

**Differential gene expression analysis:** Gene expressions were derived from raw sequencing reads using the OmicSoft ArrayStudio RNASeq analysis pipeline (Qiagen Inc). For each gene, reads uniquely mapped to the exons were identified and counted. The resulting read counts were summarized at the gene level as raw expression. Genes were flagged as “absent” or “present” in each sample using an empirical minimum raw read count of 10. For a comparison between two groups of samples, we excluded genes that were not flagged as “present” in at least 75% of the samples of the higher expressing group. For differential gene expression analyses using the DESeq2 package<sup>3</sup>, the raw read counts across samples were first normalized to adjust for the variation in sequencing depth. The dispersion of the expression was estimated by sharing information across genes with similar expression levels. Tests for differential expression were based on an expression model employing the negative binomial distribution. Independent group comparisons were used to identify differentially expressed genes for the post- versus pre-treatment groups, while paired comparisons were used to identify differentially expressed genes for ipsilateral versus contralateral hemispheres for every animal within each time point. The statistical significance level (p-value) of the differential expressions were assessed using the Wald test. The fold change was computed as the effect size of the treatment, reflecting the difference in the expression between the two groups. Significantly differentially expressed genes were identified using the criteria of i) fold changes greater than 1.5 and ii) p-values less than 0.05.

**Gene expression profiles:** The profiles were derived from raw sequencing reads using OmicSoft ArrayStudio RNASeq analysis pipeline (Qiagen Inc). Read counts were normalized using DESeq2.0 package. Differential gene expressions were identified using DESeq2 package<sup>3</sup> with a cutoff threshold  $\geq 1.5$  change and  $p$  value at 0.05.

**Heat map:** For each gene in each sample, the normalized read count was further normalized against the mean of all control samples followed by a log (base 2) transformation. Genes were organized by a hierarchical clustering algorithm using Euclidean distance (L2 norm) and an average linkage algorithm using Partek software (<https://www.partek.com/>). Gene expressions were derived from raw sequencing reads using OmicSoft ArrayStudio RNASeq analysis pipeline .

**Clustering analysis:** For each gene, DESeq2.0 normalized read counts of each sample were further normalized against the mean of the control samples (without the MCAO procedure). The normalized values in each biological replicate group were then averaged for each gene to produce a matrix of size  $m * n$ , with  $m$  being the number of significantly perturbed genes in either the ipsilateral or contralateral brain, and  $n$  being the 11 time points, including the pre-MCAO (or baseline/naive) group. The values of each gene across all time points were further normalized to a standard deviation of 1 and each value was then subtracted by the value of the control samples. The Davies-Bouldin method<sup>4</sup> was used to estimate the number of  $K$  clusters. The K-means method, based on Pearson dissimilarity, was used to cluster the genes using Partek software (St. Louis, Missouri)<sup>5</sup>.

**Pathway analysis:** Significant genes identified from each time point were subjected to canonical pathway analysis using Ingenuity Pathway Analysis software (Qiagen, Redwood, California). Gene clusters identified from clustering analysis were subjected to Pathway Enrichment Analysis using NextBio (Illumina, Cupertino, California). In the NextBio Pathway Enrichment Analysis, genes were ranked by the Pearson correlation of the expression pattern of

each gene in the cluster with the average pattern of the cluster. The results obtained by NextBio were further organized into MSigDB Reactome categories <sup>6</sup>.

**Isolation of brain immune cells:** Mice were anesthetized with isoflurane and pentobarbital and then perfused with ice-cold, heparinized phosphate-buffered saline (PBS) to remove blood. Brains were removed and the hemispheres were separated and placed into ice-cold Hanks' balanced salt solution (HBSS, Life Technologies, Grand Island, NY) without Ca<sup>2+</sup> and Mg<sup>2+</sup>. The tissue was enzymatically and mechanically dissociated with MACS Neural Tissue Dissociation Kits with Papain (Miltenyi Biotec, Bergische Gladbach, Germany). The dissociated tissue was used to obtain brain homogenates or isolated brain immune cells. Brain immune cells were isolated according to a previously described method<sup>7</sup>. Cells were centrifuged by discontinuous Percoll PLUS (GE Healthcare, Sweden) gradients and collected from the 37-70% interphases.

**Flow cytometry analysis:** Single cells ( $0.5-1 \times 10^5$ ) were pre-incubated with mouse BD Fc Block (anti-CD16/CD32,  $\leq 1 \mu\text{g}/10^6$  cells in 100  $\mu\text{l}$ , BD Biosciences), then incubated with 10% FBS in PBS at 4°C for 15 minutes, and stained with antibodies against CD11b (PE-Cy7 rat anti-mouse CD11b, 1:400, 552850) and CD45 (PE rat anti-mouse CD45, 1:1000, 553081) in 1% FBS in PBS at 4°C for 1 h. After washing with PBS, cells were immediately analyzed (Miltenyi Biotec, San Diego, CA). Unstained cells and stained cells with the corresponding isotype controls (PE-Cy7 rat IgG2b,  $\kappa$  isotype control, 552849; PE rat IgG2b) were used for negative controls. Antibodies and isotype controls used for flow cytometry were purchased from BD Bioscience or Miltenyi Biotec.

**Immunostaining of brain tissue:** The mice were perfused transcardially with 4% paraformaldehyde in 0.1 mol/L phosphate buffer. Brains were collected, post-fixed overnight, transferred into a 30% sucrose solution, and sectioned in a cryostat at a 30- $\mu\text{m}$  thickness for the immunohistochemistry. Brain sections were washed in PBS solution at pH 7.4, and incubated with 1% bovine serum albumin and 5% normal goat serum for 1 hour at room temperature. The sections were then incubated with anti-rabbit Iba-1 (1:1000, Wako, Richmond, VA, 019-19741) and anti-chicken GFP (1:1,000, Aves Lab, Davis, CA, AB16901) overnight at 4°C. Sections were washed with PBS and then incubated with secondary antibodies conjugated with Alexa Fluor 488 goat anti-chicken IgG (1:2000, Life Technologies, A11039) or Alexa Fluor 594 goat anti-rabbit IgG (1:2000, Life Technologies, A11012) for 1 hour. After washing with PBS, the sections were mounted using Fluoroshield reagent with DAPI (Sigma-Aldrich, F6057) and examined under a laser scanning confocal microscope (Carl Zeiss, Thornwood, NY, USA).

**Adoptive Transfer of Splenocytes:** According to our previously published method<sup>8</sup>, 13-week-old mice were anesthetized with isoflurane and an ~1 cm incision was made on the left side of the abdominal cavity under the rib cage. The spleen was removed by cutting the mesentery and connective tissue, and the splenic vessels were cauterized. As an analgesic, meloxicam (5 mg/kg, P.O.) was administered just prior to surgery, in addition to buprenorphine (0.5 mg/kg, S.C., every 12 h for first 48 h after surgery) and bupivacaine (0.1 ml of 0.25-0.5%, S.C., on incision site before incision). For the preparation of splenocytes, a spleen from GFP (green fluorescent protein positive) transgenic mice (Jackson lab C57BL/6-Tg(CAG-EGFP)10sb/J) was excised and minced using scissors, then pipetted in ice-cold Hanks' balanced salt solution (Life Technologies) without Ca<sup>2+</sup> and Mg<sup>2+</sup>. The mixture passed through a 70  $\mu\text{m}$  strainer and then centrifuged at 3,000 rpm for 10 minutes at 4°C to isolate splenocytes. Cells were centrifuged by discontinuous Percoll PLUS (GE Healthcare) gradients and collected from the 37-70% interphases. The mononuclear cells ( $1 \times 10^7$ ) were adoptively transferred into asplenic MCAO mice via the retroorbital venous sinus 1 day before sacrifice (2day after stroke for 3d survival and 59<sup>th</sup> day after stroke for 2m survival). Twenty-four hours after the cell transfer, the mice were sacrificed.

**Whole brain imaging:** Fixed adult mouse brains from GFP<sup>+</sup> MM cell injected animals were delipidated with a modified Adipo-Clear protocol<sup>9</sup>. Perfusion fixed brain samples were washed with B1n buffer (H<sub>2</sub>O/0.1% Triton X-100/0.3 M glycine, pH 7), then transferred to a methanol gradient series (20%, 40%, 60%, 80%) in B1n buffer, 4 mL for each brain, 1 h for each step; then 100% methanol for 1 h; then overnight incubation in 2:1 mixture of DCM:methanol and a 1.5 h incubation in 100% DCM the following day; then 100% methanol for 1 h three times, and reverse methanol gradient series (80%, 60%, 40%, 20%) in B1n buffer, 30 min for each step. Samples were then washed in B1n buffer for 1 h and overnight. The above procedures were done at room temperature with rocking to complete delipidation. The delipidated samples were then blocked in PTxwH buffer (PBS/0.1% Triton X-100/0.05% Tween 20/2 µg/ml heparin) with 5% DMSO and 0.3M glycine for 3 h and overnight at 37°C, then washed with PTxwH for 1 h, 2 h, and overnight at room temperature. For staining, brain samples were incubated in primary antibody (Aves 1020; chicken anti-GFP, 1:5000) diluted in PTxwH for 14 days at 37°C. After primary antibody incubation, samples were washed in PTxwH for 1 h, 2 h, 4 h, overnight, then 1 d three times, and then incubated in secondary antibody (Jackson ImmunoResearch 703-606-155, Alexa Fluor 647 donkey-anti-chicken, 1:1000) diluted in PTxwH for 10 days. Samples were then washed in PTxwH for 1 h, 2 h, 4 h, overnight, then 1 d three times. Samples were finally washed in PBS for one day, then proceeded for clearing with iDISCO<sup>+10</sup>. Samples were dehydrated with methanol gradient with water, then 100% methanol, DCM/methanol mixture overnight, and 100% DCM for 1h twice the next day. Brains were finally cleared for 4 h in dibenzyl ether and then stored in a fresh tube of dibenzyl ether before imaging with a LaVision Ultramicroscope II lightsheet fluorescent microscope using 4x objective. Volume imaging datasets were processed using Imaris x64 software (version 8.0.1, Bitplane) to generate the whole brain perspective views and coronal fly-through scanning movies.

**Data Availability:** A complete list of 24,475 genes analyzed and described in this study (Figure 1) was deposited and available in NCBI Short Read Archive (SRS), accession number: PRJNA525413. Lists of genes for cluster analyses and immunity described in Figures 4,5 are available in supplementary table I. Other relevant data are presented within the article.

## Supplemental Figures

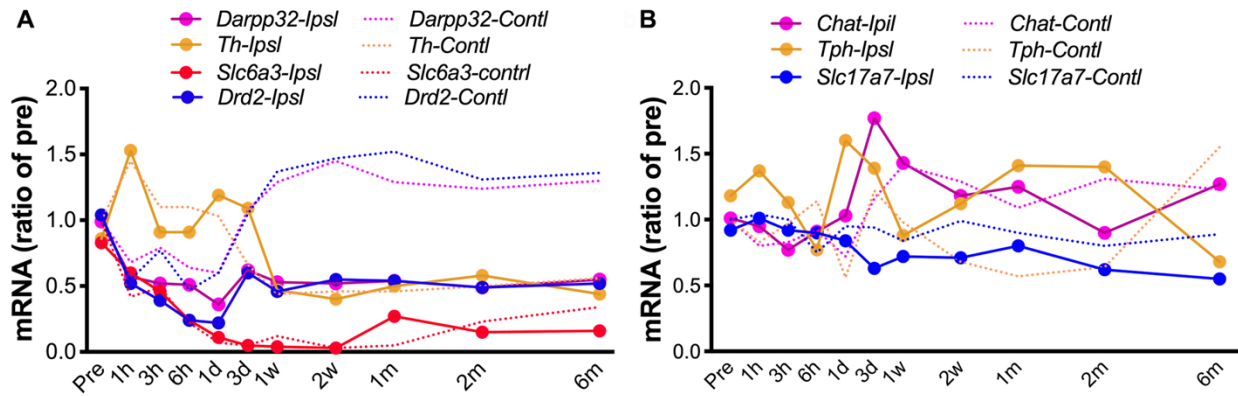

**Supplemental Figure I.** Neuronal marker gene expression across stroke stages. **A**, Markers for neurons in the striatum and substantia nigra. *Ppp1r1a* (*Darpp32*, striatal neurons) and *Drd2* (dopamine receptor D2) are among the significantly perturbed genes in cluster 2. *Th* (tyrosine hydroxylase) and *Slc6a3* (dopamine transporter) were downregulated in the ipsilateral hemisphere. **B**, Gene expression for cholinergic (*Chat*, choline acetyltransferase), serotonergic (*Tph1*) and glutaminergic (*Slc17a7*, vesicular glutamate transporter 1) markers. mRNA levels were expressed as ratios of pre-baseline values.

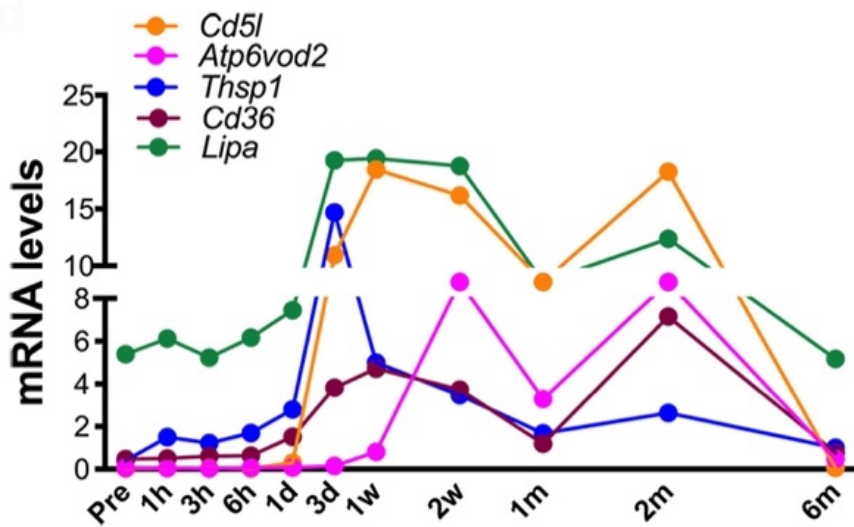

**Supplemental Figure II.** Expression profiles of selected M2 genes that showed biphasic gene profiles over time.

**Video I.** Video of cleared whole-brain imaging at 3 days post-stroke (related to Figure 6C). The movie shows the infiltrated GFP+ cells from cleared whole brain in 3 days after stroke. Two days after splenectomy, mice received GFP+ splenocytes and were sacrificed 24h after splenocyte infusions. GFP+ cells are infiltrated splenocytes.

**Video II.** Video of cleared whole-brain imaging at 2 month post-stroke (related to Figure 6C). The movie shows the infiltrated GFP+ cells from cleared whole brain in 2 month after stroke. Two days after splenectomy, mice received GFP+ splenocytes and were sacrificed 24h after splenocyte infusions. GFP+ cells are infiltrated splenocytes.

**Supplementary Table I.** A complete gene list by each cluster in the contralateral and ipsilateral hemisphere and the expression of innate immune, adaptive immune, M1, and M2, genes across time points in the ipsilateral stroked brain hemisphere. M1, M2, Adaptive and Innate immune gene lists were obtained from MSigDB (Broad Institute). They are:

MSigDB\_C2\_Coates\_Macrophage\_M1\_vs\_M2\_UP,

MSigDB\_C2\_Coates\_Macrophage\_M1\_vs\_M2\_DN,

MSigDB\_REACTOME\_ADAPTIVE\_IMMUNE\_SYSTEM,

MSigDB\_REACTOME\_INNATE\_IMMUNE\_SYSTEM from MSigDB (Broad Institute).

For each gene, the fold change was calculated for each post-stroke time point vs the pre-stroke value using DESeq normalized read counts and followed by log<sub>2</sub> transformation.



**Supplementary Table I.** A complete gene list by each cluster in the contralateral and ipsilateral hemisphere and the expression of innate immune, adaptive immune, M1, and M2, genes across time points in the ipsilateral stroked brain hemisphere. M1, M2, Adaptive and Innate immune gene lists were obtained from MSigDB (Broad Institute). They are:

MSigDB\_C2\_Coates\_Macrophage\_M1\_vs\_M2\_UP,

MSigDB\_C2\_Coates\_Macrophage\_M1\_vs\_M2\_DN,

MSigDB\_REACTOME\_ADAPTIVE\_IMMUNE\_SYSTEM,

MSigDB\_REACTOME\_INNATE\_IMMUNE\_SYSTEM from MSigDB (Broad Institute).

For each gene, the fold change was calculated for each post-stroke time point vs the pre-stroke value using DESeq normalized read counts and followed by log<sub>2</sub> transformation.

## contralateral

| Cluster | Column ID | pre | 1h       | 3h       | 6h       | 1d       | 3d       | 1w       | 2w       | 1m       | 2m       | 6m       |
|---------|-----------|-----|----------|----------|----------|----------|----------|----------|----------|----------|----------|----------|
| 1       | Gatm      | 0   | 0.191103 | 0.070277 | -0.06283 | -0.09936 | 0.996163 | 1.26282  | 1.85292  | 1.90691  | 2.06665  | 2.54689  |
| 1       | Kcnv1     | 0   | -2.51578 | -1.84023 | -0.85517 | -0.80207 | 0.170031 | 0.285184 | 0.1131   | 0.389414 | 0.570068 | 0.14664  |
| 1       | Exph5     | 0   | -2.91195 | -0.32798 | 0.33138  | 0.220907 | 0.377452 | 0.711151 | 0.197764 | 0.753415 | 0.096917 | 0.094705 |
| 1       | Pcdhb9    | 0   | 0.919091 | -0.10531 | 0.891479 | 1.13873  | 0.993246 | 1.41802  | 1.51902  | 2.06916  | 2.06662  | 3.45922  |
| 1       | Fam84b    | 0   | -1.8272  | -0.33171 | 0.432388 | 0.231072 | 0.852132 | 0.872464 | 1.279    | 1.14099  | 1.53796  | 1.60243  |
| 1       | Ddit4l    | 0   | -2.92424 | -1.68984 | -0.6283  | -0.82187 | -0.40838 | 0.077634 | 0.355278 | 0.277899 | 0.25209  | -0.18926 |
| 1       | Il33      | 0   | 0.894417 | 1.21738  | 0.962553 | -0.08168 | 1.20812  | 0.500835 | 2.12365  | 2.50728  | 1.98072  | 2.99392  |
| 1       | Enpp2     | 0   | -0.20342 | 0.668967 | 1.47336  | 2.25052  | 0.944486 | 1.84446  | 2.58093  | 2.23121  | 2.039    | 2.58333  |
| 1       | Mme       | 0   | -1.22861 | -0.46009 | -0.52533 | -0.40691 | -0.39686 | 1.69397  | 1.31351  | 1.39585  | 1.10835  | 1.01297  |
| 1       | Kdr       | 0   | -2.36392 | -1.82575 | -0.73765 | -0.22614 | -0.56331 | 0.313766 | 0.564858 | 0.895729 | 0.339632 | 0.01607  |
| 1       | Adrb1     | 0   | -2.14236 | -1.32149 | -0.64977 | -0.43313 | 0.541904 | -0.02028 | 0.748211 | 0.310133 | 1.05258  | 1.03285  |
| 1       | Trim59    | 0   | -0.7093  | -1.09233 | 0.351907 | 0.107704 | 1.41663  | 0.919293 | 1.09801  | 1.57651  | 1.88278  | 1.68571  |
| 1       | Slco1a4   | 0   | -1.82115 | -2.92757 | -0.72641 | 0.299353 | 0.32907  | 0.2826   | -0.34479 | -0.3632  | -0.21282 | -0.40148 |
| 1       | Arsg      | 0   | 0.962948 | 0.855773 | 1.00475  | 0.448568 | 0.909898 | 1.57117  | 2.66184  | 2.54903  | 1.85401  | 3.17051  |
| 1       | Kl        | 0   | -0.33619 | 0.563659 | 1.2895   | 1.84053  | 0.342648 | 1.49552  | 2.52188  | 2.27713  | 1.84517  | 2.34871  |
| 1       | Isl1      | 0   | -0.67595 | -0.37904 | -0.17928 | 0.209298 | 0.148906 | 1.91889  | 1.97492  | 1.1947   | 1.69728  | 1.58776  |
| 1       | 1500015O  | 0   | 0.897074 | 0.150305 | 1.67863  | 2.23729  | 0.738723 | 1.50386  | 2.621    | 2.40124  | 2.61159  | 2.58787  |
| 1       | Spry2     | 0   | -2.52333 | -0.45882 | -1.18699 | -0.34155 | 0.230819 | 0.646529 | 0.71408  | 0.687711 | 0.527607 | 0.536689 |
| 1       | Pygl      | 0   | 0.193712 | 1.03517  | 2.57787  | 1.83787  | 1.49189  | 1.03261  | 1.28997  | 1.55247  | 1.11046  | 3.54865  |
| 1       | Pou3f4    | 0   | -0.30852 | 0.368959 | 0.289927 | -0.095   | -0.48068 | 2.24417  | 1.48083  | 2.33025  | 1.18632  | 1.27679  |
| 1       | Dusp6     | 0   | -2.55181 | -0.35691 | -1.23279 | -0.17791 | 0.64031  | 0.12384  | 0.181175 | 0.308591 | 0.842699 | 0.847311 |
| 1       | Slc4a5    | 0   | -0.26887 | 1.5833   | 2.50721  | 2.10975  | 1.00894  | 2.00898  | 2.48993  | 2.50796  | 1.57478  | 2.46256  |
| 1       | Nqo1      | 0   | -0.25995 | -0.49795 | 1.46819  | 1.0153   | 0.07624  | 1.38965  | 1.63164  | 1.28066  | 2.49729  | 2.10997  |
| 1       | Sostdc1   | 0   | 0.385715 | 0.582169 | 0.725607 | 0.614046 | 1.18083  | 1.7084   | 2.32418  | 2.31133  | 2.51241  | 2.88568  |
| 1       | Ace       | 0   | -0.295   | 1.10245  | 1.74539  | 1.53185  | -0.22748 | 2.12344  | 2.14271  | 2.02815  | 0.898627 | 2.3646   |
| 1       | F5        | 0   | -0.52281 | 0.927339 | 1.46134  | 2.13007  | 0.643362 | 2.06953  | 2.34414  | 2.40961  | 1.56842  | 2.19099  |
| 1       | Gli3      | 0   | -2.72546 | -1.01883 | -1.20336 | 0.207523 | -0.31248 | 0.454834 | 0.265593 | 0.710129 | -0.23654 | 0.424015 |
| 1       | 1700040LC | 0   | 1.97539  | 1.24497  | 1.61782  | 1.46055  | 1.18425  | 2.12225  | 2.6543   | 3.09485  | 2.61963  | 3.52446  |
| 1       | Krt8      | 0   | 0.866651 | 0.177847 | 2.02472  | 2.75272  | 1.48044  | 1.00218  | 2.83475  | 1.61131  | 1.15872  | 2.76503  |
| 1       | Ttr       | 0   | 0.433715 | 0.234411 | 1.62457  | 2.04034  | 0.522221 | 1.51967  | 2.55166  | 1.97868  | 2.35234  | 2.80506  |
| 1       | Mfrp      | 0   | 0.876163 | 1.54969  | 1.89122  | 1.25536  | 0.198751 | 1.97694  | 3.51511  | 1.95684  | 1.30822  | 2.47015  |

|   |          |   |          |          |          |          |          |          |          |          |          |          |
|---|----------|---|----------|----------|----------|----------|----------|----------|----------|----------|----------|----------|
| 1 | Sox21    | 0 | -2.86217 | -1.49339 | -0.57629 | -0.03899 | -0.11495 | 0.106641 | 0.231443 | -0.3091  | 0.087492 | 0.801306 |
| 1 | Ntrk1    | 0 | -1.42522 | -0.77646 | 0.324259 | -0.01175 | -1.01935 | 1.12838  | 1.52191  | 1.06437  | 1.17284  | 0.950734 |
| 1 | Kcnj13   | 0 | 0.229252 | 0.703962 | 0.679027 | 1.85701  | 0.888934 | 1.59535  | 2.42755  | 2.54542  | 2.4019   | 2.75177  |
| 1 | Lhx8     | 0 | -1.14974 | -1.21371 | -1.3066  | 0.345414 | -0.34268 | 0.996037 | 1.01126  | 0.880586 | 1.18205  | 1.13517  |
| 1 | Csrp2    | 0 | 0.925675 | 0.538769 | 1.13069  | 1.14805  | 0.130318 | 1.48209  | 2.23811  | 2.01852  | 2.63291  | 3.04756  |
| 1 | Ascl1    | 0 | -2.45317 | -2.2428  | -0.78338 | -1.24362 | 0.08084  | -0.31842 | 0.395502 | -0.2404  | 0.58007  | -0.71896 |
| 1 | Kcne2    | 0 | 0.453947 | 0.646313 | 1.85199  | 2.44316  | 1.73188  | 1.92323  | 2.95643  | 2.39613  | 2.69232  | 2.63217  |
| 1 | Clic6    | 0 | 0.370777 | 1.92853  | 2.21692  | 2.58544  | 0.89483  | 2.34614  | 2.95524  | 2.71713  | 1.76301  | 2.60385  |
| 1 | Hyi      | 0 | 1.1887   | -0.2039  | 2.29208  | 3.37809  | 1.92028  | 0.806654 | 1.27492  | 1.06957  | 1.1209   | 1.43888  |
| 1 | Ecel1    | 0 | 0.936744 | 0.61123  | 0.905488 | 1.67995  | -0.0938  | 2.22586  | 2.10505  | 2.44401  | 2.28686  | 2.66713  |
| 1 | Tnfaip6  | 0 | 1.81998  | 0.705345 | 1.73337  | 0.118451 | 1.19739  | 0.201551 | 2.75774  | 1.67689  | 2.06404  | 2.74257  |
| 1 | Klhl1    | 0 | 0.945842 | 1.28372  | 1.31269  | 0.895876 | 1.58263  | 3.15239  | 2.22313  | 2.74262  | 2.02939  | 3.11778  |
| 1 | A230001M | 0 | 0.926986 | 0.82484  | -0.65857 | 0.594896 | 0.627176 | 1.13053  | 1.52192  | 2.43837  | 2.45702  | 2.24079  |
| 1 | Zic3     | 0 | 2.31466  | 2.35681  | 3.26396  | 3.46711  | 2.81423  | 3.42212  | 2.99124  | 1.5084   | 2.33115  | 2.49613  |
| 1 | Cldn5    | 0 | -1.15085 | -1.15881 | 0.83559  | -0.63505 | -1.01381 | 0.73721  | 0.953639 | 0.381168 | 1.66794  | 1.03504  |
| 1 | Inmt     | 0 | -0.71396 | -0.84607 | 0.36676  | 0.640389 | 0.788347 | 0.879702 | 1.77932  | 1.93967  | 1.09534  | 2.15645  |
| 1 | Enkur    | 0 | 1.97208  | 0.982739 | 2.90714  | 2.13397  | 2.27617  | 2.75109  | 1.8001   | 1.61266  | 3.71092  | 2.65099  |
| 1 | Krt18    | 0 | 1.34973  | 1.74623  | 2.92471  | 2.02752  | 0.412376 | 1.87058  | 2.65913  | 2.41079  | 2.80815  | 2.96214  |
| 1 | Abca1    | 0 | -0.66968 | 1.65914  | 1.25768  | 2.01057  | 1.47868  | 3.21743  | 1.37608  | 1.54403  | 1.17867  | 1.22116  |
| 1 | Stxbp3   | 0 | 1.59775  | 2.99317  | 3.87309  | 2.75998  | 1.58816  | 2.29621  | 1.57619  | 2.17422  | 2.01745  | 2.72984  |
| 1 | Prlr     | 0 | 0.999539 | 2.06383  | 2.57067  | 2.95007  | 2.38868  | 3.13401  | 2.86202  | 2.8136   | 3.28645  | 2.78919  |
| 1 | Serpind1 | 0 | 1.30204  | 0.310867 | 1.36212  | -0.22368 | 0.725079 | 0.995461 | 1.21916  | 2.31211  | 1.92415  | 3.1181   |
| 1 | Lbp      | 0 | -0.44571 | 0.085888 | 0.922041 | 2.34838  | 0.235085 | 2.156    | 2.27148  | 1.49106  | 1.21862  | 1.71691  |
| 1 | Barx2    | 0 | -2.71016 | -2.51882 | -0.70284 | -1.46361 | -1.72987 | -0.5055  | -0.70461 | -0.10867 | 0.315341 | -0.72022 |
| 1 | Ankrd55  | 0 | 2.03484  | 1.18157  | 1.33654  | 2.32545  | 2.35776  | 2.2557   | 2.56767  | 2.85017  | 3.00548  | 3.66113  |
| 1 | Gbp2     | 0 | -0.88674 | 0.076191 | -0.79978 | 1.13084  | 0.879752 | 1.69418  | 2.28168  | 1.13784  | 1.05315  | 1.27547  |
| 1 | Tfap2b   | 0 | -0.1011  | 0.98279  | 0.780301 | -0.4296  | 1.15231  | 1.88025  | 1.46847  | 1.91917  | 2.28155  | 2.54585  |
| 1 | Vamp8    | 0 | 0.956977 | 0.279421 | 0.699668 | 1.40721  | 1.7927   | 1.71658  | 1.57349  | 1.62953  | 2.94533  | 3.25439  |
| 1 | Rab29    | 0 | 0.117595 | -1.15325 | -0.56744 | 0.873788 | 1.5401   | 0.230566 | 1.28212  | 0.855039 | 2.32516  | 1.20818  |
| 1 | Fat4     | 0 | -3.25059 | -0.93847 | -0.01123 | -0.29885 | -0.03851 | -0.21295 | -0.74952 | 0.11188  | 0.488798 | -0.42444 |
| 1 | Gm5089   | 0 | 1.06748  | -0.16504 | 0.034174 | 0.221206 | -0.64775 | 2.06618  | 0.752592 | 1.43112  | 2.25211  | 1.90843  |
| 1 | Col8a2   | 0 | -0.12967 | -0.06567 | 0.698803 | 1.73977  | 0.030296 | 1.2633   | 1.73497  | 2.08977  | 2.08885  | 2.44941  |
| 1 | Otx2     | 0 | 1.59024  | 1.79449  | 2.1859   | 2.51942  | 1.76809  | 2.47078  | 3.51261  | 2.64094  | 3.3883   | 3.20063  |
| 1 | Gpr149   | 0 | 0.165591 | 1.31688  | 1.16469  | 1.57731  | 1.35295  | 2.79026  | 3.0707   | 2.79498  | 1.40201  | 1.7031   |
| 1 | C3       | 0 | 0.540493 | 1.2057   | 1.01572  | 3.17363  | 2.73349  | 2.24092  | 2.43717  | 1.97474  | 1.23893  | 2.53889  |

|   |           |   |          |          |          |          |          |          |          |          |          |          |
|---|-----------|---|----------|----------|----------|----------|----------|----------|----------|----------|----------|----------|
| 1 | A430035B: | 0 | -0.2726  | -0.59522 | 0.555577 | 1.05045  | -0.47044 | 0.164979 | 0.157173 | 1.05234  | 2.98506  | 0.361667 |
| 1 | Ifi27     | 0 | 1.02988  | 0.140064 | 1.21689  | 1.20352  | 2.30746  | 0.76954  | 1.45458  | 1.67348  | 3.42379  | 2.32238  |
| 1 | Tmem72    | 0 | -0.1962  | 0.897493 | 2.51938  | 2.02566  | 0.861114 | 1.8418   | 2.35225  | 2.28779  | 2.37838  | 2.27533  |
| 1 | Dlk1      | 0 | 2.45634  | 2.14515  | 2.54602  | 2.10514  | 1.04656  | 3.51386  | 2.98165  | 2.42682  | 1.76361  | 3.22618  |
| 1 | Gbp4      | 0 | -0.26213 | -0.69566 | -0.54608 | -0.06901 | 1.19362  | 0.141297 | 1.46731  | 2.10498  | 1.71556  | 1.39661  |
| 1 | Aqp1      | 0 | 1.58008  | 1.76782  | 3.21758  | 1.34968  | 1.51406  | 1.76417  | 3.13432  | 2.90015  | 2.96516  | 2.79559  |
| 1 | Cfap126   | 0 | 1.89151  | 0.126914 | 1.5828   | 2.36999  | 0.834284 | 1.4809   | 3.08857  | 1.64661  | 2.51171  | 2.58304  |
| 1 | Mir6240   | 0 | -0.51297 | 1.31922  | 0.402929 | 0.035743 | -0.08478 | 0.101133 | -1.75832 | 0.28896  | 2.24857  | 0.178984 |
| 1 | Igip      | 0 | 1.79331  | 0.89311  | 1.39904  | 1.10252  | 2.59706  | 0.857981 | 1.2612   | 1.30504  | 3.66572  | 2.38231  |
| 1 | Drc7      | 0 | -0.02517 | 0.894364 | 0.458993 | 2.25101  | 0.971271 | 1.38448  | 2.33313  | 2.49826  | 1.91885  | 2.67026  |
| 1 | Mamdc2    | 0 | 0.163513 | -0.96338 | 0.004423 | 1.4198   | 1.00552  | 0.782843 | 2.15104  | 2.29825  | 1.64789  | 1.00923  |
| 1 | Foxj1     | 0 | 2.2238   | 1.50466  | 2.43821  | 2.69701  | 1.05025  | 2.48815  | 3.22867  | 2.34694  | 2.68614  | 3.48506  |
| 1 | Adamts14  | 0 | -1.94282 | -1.05722 | 0.814422 | -0.75819 | -0.38223 | -0.76725 | 1.14109  | 0.616863 | 0.743906 | 0.966596 |
| 1 | Nup43     | 0 | 1.30867  | -1.22102 | 1.49805  | 0.395552 | 1.40566  | 2.16327  | 0.960951 | 0.408714 | 2.24837  | 0.933285 |
| 1 | Cfap43    | 0 | 1.53731  | 2.42447  | 3.57396  | 2.94854  | 2.01489  | 3.02099  | 2.55144  | 2.95002  | 1.36004  | 2.62648  |
| 1 | AW551984  | 0 | 2.7901   | 2.86695  | 3.26775  | 3.10842  | 3.41437  | 3.8336   | 3.32767  | 2.97254  | 2.5066   | 2.75939  |
| 1 | Sncg      | 0 | 3.07869  | 1.00169  | 2.51068  | 2.7487   | 2.35481  | 2.64747  | 2.77647  | 1.72969  | 2.65304  | 3.47524  |
| 1 | Nexn      | 0 | -0.50282 | -0.52838 | -1.126   | -0.30554 | -0.13496 | 0.853988 | 0.554699 | 0.97153  | 2.57602  | 0.411534 |
| 1 | Ttc21a    | 0 | 0.903648 | 1.81877  | 3.26845  | 3.02764  | 2.48596  | 2.80232  | 2.75818  | 2.62557  | 2.55789  | 2.92716  |
| 1 | Gabrq     | 0 | 2.87171  | 2.78045  | 3.26163  | 3.60229  | 3.08685  | 3.64377  | 3.0034   | 2.93796  | 2.12382  | 2.54011  |
| 1 | Scara5    | 0 | 1.17557  | 3.34252  | 3.03316  | 2.27435  | 1.50703  | 1.95233  | 2.46335  | 0.984712 | 1.61752  | 0.780882 |
| 1 | Slc2a12   | 0 | 0.99863  | 2.59491  | 2.28771  | 1.62539  | 1.16652  | 2.5297   | 3.22163  | 2.45367  | 1.69882  | 3.28752  |
| 1 | Abca4     | 0 | -1.49844 | 1.05032  | 0.637709 | 1.48081  | 0.142615 | 1.02117  | 2.23594  | 1.29004  | 1.32437  | 1.49247  |
| 1 | Folr1     | 0 | 0.074032 | 1.13716  | 1.55688  | 2.3598   | 0.553827 | 1.69079  | 2.54949  | 2.43429  | 1.55332  | 2.89356  |
| 1 | Asb4      | 0 | 3.10091  | 0.915848 | 2.56481  | 3.03066  | 1.76893  | 3.07403  | 2.7565   | 2.01653  | 2.0258   | 2.94349  |
| 1 | Fam183b   | 0 | 3.1558   | 1.36099  | 3.41179  | 3.07472  | 1.70136  | 2.50883  | 1.75148  | 1.9154   | 2.25752  | 3.02436  |
| 1 | Fzd5      | 0 | 0.448826 | -0.05814 | 0.216647 | 1.02678  | 1.15676  | 2.29723  | 2.52811  | 2.25931  | 2.0996   | 1.95006  |
| 1 | Gng5      | 0 | 1.25975  | -0.57282 | 0.606797 | 0.708185 | 1.458    | 1.39704  | 1.31635  | 1.81764  | 3.17358  | 1.85371  |
| 1 | Cdkn1c    | 0 | 0.442543 | 0.147157 | 0.394406 | 0.866329 | 0.271515 | 1.78366  | 1.70328  | 1.72104  | 2.04307  | 3.12961  |
| 1 | Mdfic     | 0 | 0.3741   | 1.2888   | 1.78424  | 1.17071  | 0.997219 | 2.86303  | 2.86322  | 2.52528  | 1.65208  | 2.71603  |
| 1 | Frem2     | 0 | -2.78426 | -2.07109 | -1.19381 | -1.00438 | -1.93425 | -0.3202  | -1.33019 | 0.029409 | 0.438584 | -1.27673 |
| 1 | Ankrd37   | 0 | -0.31127 | 1.46692  | 2.77444  | 0.689006 | 1.69977  | 1.49875  | 2.03802  | 1.49949  | 2.66269  | 2.21523  |
| 1 | 1500012FC | 0 | 0.371358 | -0.31671 | 0.591538 | 0.714737 | 0.113012 | 2.47915  | 1.39738  | 1.60532  | 2.38666  | 2.10418  |
| 1 | Cd24a     | 0 | 0.227897 | -0.2474  | 0.919602 | 3.1951   | 1.47127  | 2.00828  | 1.21942  | 0.650877 | 0.439205 | 0.413003 |
| 1 | Myb       | 0 | -0.43147 | 2.21481  | 1.26089  | 1.65937  | 0.781138 | 1.67852  | 1.61926  | 2.06294  | 0.110153 | 2.66883  |

|   |           |   |          |          |          |          |          |          |          |          |          |          |
|---|-----------|---|----------|----------|----------|----------|----------|----------|----------|----------|----------|----------|
| 1 | Gstt3     | 0 | 1.30453  | 1.23858  | 0.974063 | 0.838206 | 2.92669  | 2.10065  | 2.74925  | 1.85946  | 3.07807  | 2.63369  |
| 1 | ligp1     | 0 | -1.2759  | 0.822675 | -0.09192 | -0.5627  | 1.27136  | 1.18961  | 1.93686  | 1.34705  | 1.61171  | 0.921124 |
| 1 | Lrp2      | 0 | 1.43205  | 2.52393  | 3.00808  | 3.00731  | 2.37073  | 3.96975  | 2.06239  | 2.53808  | 2.33396  | 2.26199  |
| 1 | Cldn2     | 0 | -0.31809 | -0.01879 | 0.92615  | 1.47107  | 0.759484 | 0.774244 | 2.88264  | 1.62355  | 2.19347  | 1.79985  |
| 1 | Serpinb1b | 0 | 3.04396  | 1.81224  | 1.65783  | 2.86711  | 2.6598   | 2.60951  | 2.32814  | 3.12347  | 2.23307  | 3.83108  |
| 1 | Mboat1    | 0 | 0.440193 | -0.32478 | -0.57613 | 0.782596 | 1.63279  | 0.139037 | 1.94452  | 1.6458   | 2.41522  | 1.39174  |
| 1 | 311000112 | 0 | 1.21438  | 2.34739  | 2.19746  | 2.78178  | 2.86269  | 2.52988  | 1.95993  | 2.31284  | 3.59841  | 3.35695  |
| 1 | Klk6      | 0 | 0.569308 | 0.6058   | 0.446282 | 0.526399 | 1.39711  | -0.13688 | 1.86888  | 1.7922   | 2.87074  | 2.39961  |
| 1 | Baiap3    | 0 | 2.80739  | 2.35563  | 2.88931  | 1.86482  | 2.05482  | 3.41802  | 3.6516   | 3.18274  | 2.75674  | 2.94372  |
| 1 | Hcrtr2    | 0 | -1.15442 | 0.6848   | 0.162232 | 0.983044 | 0.669143 | 1.93456  | 0.593827 | 2.0116   | 1.61137  | 2.09232  |
| 1 | Ccdc180   | 0 | 0.148237 | -0.39241 | 2.6141   | 2.30205  | 0.494995 | 1.72232  | 0.908189 | -0.09044 | 1.11576  | 0.430047 |
| 1 | Clk1      | 0 | -0.7149  | 1.01738  | 1.76233  | 0.883428 | 1.59486  | 2.26687  | 0.357404 | 2.06334  | 2.45761  | 1.53527  |
| 1 | Pter      | 0 | 1.05557  | 0.63813  | 1.44781  | 1.06339  | 2.24077  | 2.16157  | 2.6337   | 1.14271  | 1.71097  | 3.57276  |
| 1 | Maats1    | 0 | 2.10446  | 0.285706 | 2.19056  | 3.09957  | 0.948167 | 2.80805  | 2.29643  | 2.28833  | 2.28762  | 2.12357  |
| 1 | Parp12    | 0 | 1.42603  | 2.17408  | 2.01401  | 1.78082  | 3.74249  | 3.21105  | 2.71988  | 2.24653  | 2.8444   | 2.75416  |
| 1 | Slc14a2   | 0 | 0.158578 | 1.56386  | 2.73322  | 2.38945  | 1.77523  | 2.65364  | 2.39463  | 2.77124  | 2.40315  | 2.60538  |
| 1 | Scn9a     | 0 | 2.43583  | 2.41821  | 2.88311  | 3.27156  | 3.01251  | 3.72611  | 2.35755  | 2.51086  | 1.96105  | 1.44182  |
| 1 | Gm15706   | 0 | -0.88595 | -0.94682 | 0.061985 | -0.36473 | 1.48949  | 0.244243 | 0.770207 | 0.576451 | 2.33717  | -0.47932 |
| 1 | Postn     | 0 | 0.162592 | -0.59043 | 0.161437 | 2.4457   | 1.18455  | 2.50134  | 0.617828 | 0.986064 | 0.934324 | -0.09323 |
| 1 | Sytl4     | 0 | 2.71681  | 2.44271  | 3.36426  | 3.33863  | 2.5871   | 3.40468  | 1.95469  | 1.83075  | 1.48926  | 2.39875  |
| 1 | Tagln     | 0 | 0.705209 | 0.380562 | -0.29061 | 0.431948 | 0.524583 | 1.85723  | 2.23996  | 1.98312  | 2.37129  | 2.16916  |
| 1 | Irs4      | 0 | 2.60292  | 2.76955  | 2.9549   | 3.31297  | 2.53771  | 3.92458  | 3.03853  | 2.93213  | 1.99906  | 2.19385  |
| 1 | Ppap2c    | 0 | 1.92047  | 0.026281 | 2.27887  | 1.33628  | 0.648116 | 1.30229  | 2.40906  | 2.48969  | 2.11427  | 2.87616  |
| 1 | 1700003M  | 0 | 1.09695  | -0.04031 | 1.34404  | 2.11162  | 1.15087  | 1.44638  | 1.75758  | 2.00589  | 3.56267  | 1.0417   |
| 1 | Zfp677    | 0 | 0.770618 | 1.20472  | 0.672969 | 2.71039  | 3.17066  | 1.72337  | 2.04973  | 2.3391   | 2.4828   | 2.53819  |
| 1 | Six3os1   | 0 | -1.20151 | -0.24514 | -0.9295  | 0.666679 | -0.22084 | 2.14828  | 0.80582  | 1.05496  | 1.30966  | 0.80152  |
| 1 | Rdh5      | 0 | 1.67573  | 1.34305  | 3.04279  | 1.78469  | 2.55202  | 2.45203  | 3.15591  | 2.62795  | 3.2896   | 3.1287   |
| 1 | Tuft1     | 0 | 1.85014  | 0.929693 | 0.518528 | 1.75786  | -0.46954 | 1.35201  | 3.00253  | 1.96616  | 1.70269  | 1.94602  |
| 1 | Fbln5     | 0 | 1.54041  | 2.76951  | 2.55601  | 3.11203  | 0.697614 | 2.78341  | 2.44423  | 1.98439  | 2.74447  | 2.89505  |
| 1 | Rgs22     | 0 | 2.10723  | 1.76555  | 1.90454  | 4.13356  | 2.16824  | 2.95248  | 2.43159  | 2.56913  | 2.38206  | 2.87386  |
| 1 | Sema3b    | 0 | 0.38651  | 1.5686   | 0.143409 | 1.87863  | -0.19526 | 2.0888   | 2.71126  | 1.57016  | 1.06837  | 2.20757  |
| 1 | Casq2     | 0 | -0.67864 | 0.760923 | 1.46152  | 2.43766  | 0.371989 | 1.38191  | 0.857217 | 1.11921  | 2.77185  | 0.636495 |
| 1 | Zfp185    | 0 | 0.272058 | 2.37685  | 2.27203  | 2.68702  | 0.522755 | 2.35082  | 1.90827  | 2.37456  | 2.57214  | 2.26249  |
| 1 | Steap4    | 0 | 0.213741 | 2.11542  | 1.75187  | 3.43084  | 0.824683 | 2.42466  | 2.08578  | 1.03937  | 1.60587  | 1.83043  |
| 1 | Nek5      | 0 | 2.58188  | 1.02573  | 3.26104  | 2.79699  | 1.01246  | 2.50151  | 2.65874  | 2.64558  | 1.84006  | 2.69095  |

|   |           |   |          |          |          |          |          |          |          |          |          |          |
|---|-----------|---|----------|----------|----------|----------|----------|----------|----------|----------|----------|----------|
| 1 | Plscr1    | 0 | -0.61178 | 2.20774  | 0.836287 | 0.639016 | 0.759023 | 0.067317 | 1.65985  | 1.78468  | 1.25773  | 2.65739  |
| 1 | Fam46a    | 0 | 0.820754 | 2.08128  | 1.14846  | 1.6194   | 3.0057   | 2.39756  | 1.43816  | 1.86851  | 3.20636  | 2.9807   |
| 1 | Znf41-ps  | 0 | -0.04328 | -0.70808 | 1.72683  | 1.63668  | 1.61719  | 1.87561  | 1.69226  | 2.13975  | 2.26876  | 1.33211  |
| 1 | Dnah10    | 0 | 0.780745 | 1.18907  | 2.22042  | 1.90683  | 0.975545 | 3.33052  | 2.52885  | 2.15379  | 3.01707  | 1.77868  |
| 1 | Iqca      | 0 | 2.5349   | 2.14733  | 2.7282   | 3.07062  | 1.75402  | 2.4225   | 2.42918  | 0.691156 | 3.21804  | 2.83746  |
| 1 | Rn4.5s    | 0 | 0.659979 | 1.24043  | 1.54341  | 2.13267  | 3.40203  | 1.7075   | 0.592992 | 2.06477  | 2.7473   | 1.00142  |
| 1 | Tmem220   | 0 | 1.24943  | 2.94401  | 3.54297  | 2.61303  | 1.53945  | 2.21473  | 2.64551  | 2.92824  | 2.85784  | 2.67203  |
| 1 | Atox1     | 0 | -0.25355 | -2.76096 | -0.03507 | -0.54175 | -0.01249 | -0.13349 | 1.11918  | -0.00865 | 0.797651 | 0.517362 |
| 1 | Ccdc122   | 0 | 1.44757  | 1.15257  | 2.02285  | 0.096009 | 1.64381  | 3.00111  | 1.69708  | 2.03587  | 2.84443  | 2.67551  |
| 1 | Fbxo36    | 0 | 1.39898  | 2.08826  | 2.45698  | 2.06876  | 1.74102  | 1.38736  | 2.68865  | 1.66695  | 3.37813  | 3.58424  |
| 1 | Spag16    | 0 | 1.98891  | 0.724653 | 1.93903  | 2.94595  | 1.90267  | 2.54076  | 2.66338  | 1.17265  | 3.04293  | 2.98057  |
| 1 | Fam216b   | 0 | 0.785518 | 1.68635  | 1.16707  | 2.42321  | 2.80924  | 2.68616  | 2.62361  | 1.54388  | 2.96134  | 2.95837  |
| 1 | Bok       | 0 | 3.13624  | 2.53563  | 2.44583  | 2.2583   | 1.46348  | 2.70706  | 3.34628  | 2.43707  | 3.08485  | 3.56208  |
| 1 | C4b       | 0 | -0.65043 | 0.216872 | 0.309103 | 1.52013  | 1.9387   | 2.43303  | 1.49758  | 1.26915  | 0.770304 | 2.28001  |
| 1 | Vkorc1    | 0 | 1.71506  | -0.09705 | 1.73761  | 0.55542  | 1.4227   | 1.87949  | 2.3931   | 0.926846 | 2.49699  | 2.90134  |
| 1 | Mthfs     | 0 | 1.29845  | -0.12317 | 0.943037 | 1.76976  | 0.418576 | 2.29768  | 1.88137  | 2.45272  | 2.76248  | 2.0398   |
| 1 | Adgb      | 0 | 2.19122  | 1.52786  | 3.61791  | 3.2232   | 2.33527  | 3.34728  | 2.95792  | 2.57633  | 2.26546  | 2.52381  |
| 1 | Igsf1     | 0 | 2.53221  | 1.03467  | 3.34392  | 2.52706  | 2.59283  | 1.83753  | 3.31677  | 2.92235  | 1.74401  | 2.05355  |
| 1 | 1700026Dl | 0 | 1.39243  | 1.57997  | 2.83969  | 3.44985  | 1.80906  | 1.41294  | 2.88876  | 1.53622  | 0.771313 | 2.3325   |
| 1 | Gm7120    | 0 | 2.03361  | 1.7044   | 0.467166 | 0.247066 | 1.45406  | 2.15961  | 1.76888  | 1.43861  | 3.01139  | 2.92665  |
| 1 | Dnah6     | 0 | 1.2702   | 2.04071  | 2.77189  | 2.94345  | 1.78198  | 2.63329  | 3.74418  | 2.8338   | 2.74247  | 2.19897  |
| 1 | Tnni1     | 0 | 1.57178  | 2.34978  | 2.43312  | 0.729836 | 0.942553 | 1.32787  | 2.43293  | -0.07538 | 2.65033  | 2.23755  |
| 1 | AF357355  | 0 | 0.072405 | 1.30522  | 2.23844  | 2.37093  | 2.8621   | 1.18635  | 0.43192  | 1.72503  | 1.95577  | 0.319859 |
| 1 | Apod      | 0 | 0.267224 | 0.243704 | 0.995339 | 2.20977  | 1.0093   | 3.32172  | 0.392613 | 0.410624 | 1.49493  | 1.34517  |
| 1 | Dnali1    | 0 | 2.23308  | 1.15525  | 2.63992  | 3.37559  | 1.84058  | 3.13225  | 3.32626  | 2.68165  | 2.08293  | 2.28435  |
| 1 | Bbox1     | 0 | 2.56808  | 1.1564   | 3.65522  | 3.12026  | 1.66409  | 1.5459   | 2.73758  | 2.13542  | 2.22052  | 2.42085  |
| 1 | Ccl21b    | 0 | 3.50962  | 2.24935  | 2.58879  | 2.80894  | 2.84867  | 3.27885  | 2.97572  | 2.47521  | 3.403    | 3.62173  |
| 1 | Eno4      | 0 | 0.582667 | 1.18984  | 2.8264   | 2.54688  | 1.53646  | 3.05355  | 2.35245  | 2.98848  | 1.81708  | 2.02013  |
| 1 | Nat2      | 0 | 2.51729  | 2.33652  | 0.526482 | 2.44596  | 1.86655  | 3.25353  | 2.56529  | 2.82158  | 2.77805  | 2.56036  |
| 1 | Ebf3      | 0 | 3.24671  | 2.03176  | 3.00221  | 2.69085  | 2.88149  | 3.41548  | 2.65517  | 3.00237  | 3.42697  | 3.54252  |
| 1 | Calcr     | 0 | 3.15143  | 1.33769  | 3.31247  | 2.45618  | 1.24782  | 3.22642  | 1.74369  | 1.75839  | 2.37246  | 2.16011  |
| 1 | Ak7       | 0 | 1.49388  | 0.86     | 3.00655  | 2.86575  | 2.15898  | 3.29574  | 2.97123  | 1.81319  | 2.1392   | 1.92636  |
| 1 | Calml4    | 0 | 0.096631 | -0.11758 | 1.64533  | 2.09013  | 1.04611  | 2.469    | 2.19797  | 2.37491  | 1.74855  | 2.1295   |
| 1 | S100a11   | 0 | 1.3372   | 1.03715  | 2.58524  | 1.92805  | 1.40961  | 3.38335  | 2.89454  | 2.31217  | 2.34803  | 3.00508  |
| 1 | Adgrv1    | 0 | 0.610774 | 2.72864  | 3.07403  | 1.85709  | 1.72404  | 2.41922  | 2.39632  | 0.852683 | 2.73609  | 2.46427  |

|   |          |   |          |          |          |          |          |          |          |          |         |          |
|---|----------|---|----------|----------|----------|----------|----------|----------|----------|----------|---------|----------|
| 1 | Ctxn2    | 0 | 2.56209  | 1.36391  | 1.90157  | 2.11929  | 2.26181  | 2.5161   | 2.24771  | 2.16832  | 3.63456 | 3.63996  |
| 1 | Mlf1     | 0 | 2.22692  | 2.32713  | 1.78472  | 3.43007  | 3.12404  | 2.70035  | 1.57329  | 1.75616  | 3.19068 | 3.13968  |
| 1 | Plcb2    | 0 | 1.7075   | 0.206178 | 1.96395  | 1.45189  | 1.25718  | 3.38458  | 2.88465  | 2.13906  | 1.38037 | 1.88125  |
| 1 | Aldh3b1  | 0 | 1.71297  | 1.19154  | 0.239541 | 0.763616 | 0.947742 | 1.93335  | 2.75838  | 3.07344  | 2.39323 | 1.87752  |
| 1 | Mmp11    | 0 | 1.6589   | 0.63097  | 0.635027 | 1.93009  | 2.13694  | 2.56644  | 2.59382  | 2.17941  | 2.73676 | 3.08776  |
| 1 | Pabpc5   | 0 | 2.30863  | 3.57597  | 2.28027  | 3.2914   | 1.59337  | 3.24384  | 2.82102  | 2.86773  | 1.87861 | 2.49691  |
| 1 | Spata18  | 0 | 2.63083  | 0.975442 | 3.15707  | 3.31818  | 2.37429  | 2.93223  | 3.01933  | 2.23189  | 2.69789 | 2.35908  |
| 1 | Cdhr3    | 0 | 1.25166  | 1.5253   | 3.61964  | 3.1754   | 2.68735  | 2.68662  | 2.46843  | 1.92498  | 1.70522 | 1.84095  |
| 1 | Rbm47    | 0 | 1.82574  | 3.09839  | 1.59461  | 2.02685  | 1.75921  | 2.98602  | 3.3951   | 3.01227  | 2.82786 | 3.03018  |
| 1 | Dap      | 0 | 3.33023  | 2.6353   | 3.34809  | 2.83369  | 2.50413  | 3.28697  | 3.606    | 2.16191  | 3.12182 | 3.15476  |
| 1 | Rbpms    | 0 | 1.92318  | 0.209468 | 1.51256  | 2.52066  | 2.54678  | 2.80332  | 2.18904  | 2.51503  | 1.11708 | 2.76329  |
| 1 | Steap1   | 0 | 0.798484 | 1.91943  | 3.08754  | 2.94154  | 1.67616  | 2.29884  | 2.94811  | 2.93361  | 2.53939 | 2.73976  |
| 1 | 2610305D | 0 | 1.10836  | 2.44293  | 2.62861  | 3.09528  | 2.57189  | 2.83619  | 2.6129   | 3.15758  | 3.00484 | 1.37404  |
| 1 | Sntn     | 0 | 1.07957  | -0.07831 | 1.89396  | 2.7567   | 2.543    | 2.07046  | 1.54639  | 2.27183  | 2.78729 | 1.86699  |
| 1 | Ccdc153  | 0 | 1.70638  | 0.458801 | 2.60292  | 2.35477  | 1.35443  | 1.64978  | 1.4482   | 1.35072  | 2.97933 | 3.24924  |
| 1 | Wdr63    | 0 | 1.59193  | 0.556537 | 1.15897  | 3.01614  | 2.67903  | 2.29531  | 2.69313  | 2.60041  | 2.77454 | 1.67734  |
| 1 | Ddc      | 0 | 1.31634  | 1.51496  | 3.2293   | 2.98035  | 0.784372 | 2.51136  | 0.784075 | 0.828803 | 1.684   | 1.77925  |
| 1 | Lhfp15   | 0 | 1.90788  | 0.632384 | 2.51327  | 2.32009  | 0.795087 | 1.80706  | 2.35091  | 1.59189  | 2.70819 | 3.358    |
| 1 | Ngb      | 0 | 1.82745  | 1.33077  | 2.3695   | 2.84945  | 0.743269 | 2.5592   | 2.30285  | 1.99466  | 1.96604 | 3.64163  |
| 1 | Cartpt   | 0 | 0.437208 | 0.158116 | 0.23846  | 0.703206 | -0.28312 | 0.526606 | 1.06679  | 2.14687  | 3.04176 | 1.40899  |
| 1 | Rpl37rt  | 0 | 0.980061 | 0.052041 | 0.135425 | 1.65324  | 3.03771  | 0.590787 | 0.112281 | -0.16707 | 1.80496 | 0.437195 |
| 1 | Lrrc9    | 0 | 0.755321 | 2.26396  | 0.316289 | 2.92136  | 2.37984  | 2.20098  | 2.88841  | 1.32935  | 1.16051 | 1.64917  |
| 1 | B3gnt9   | 0 | 0.67907  | 1.42633  | 0.220916 | 1.59205  | 1.9747   | -0.43526 | 1.34233  | 1.35585  | 1.66474 | 3.09673  |
| 1 | Pgr15l   | 0 | 2.46799  | 1.30006  | 2.11273  | 3.46201  | 2.4953   | 2.55861  | 2.95247  | 1.34161  | 1.91998 | 0.877387 |
| 1 | Dynlrb2  | 0 | 3.01972  | 1.97211  | 2.76612  | 3.16951  | 2.59259  | 3.08872  | 3.12556  | 3.29972  | 3.59375 | 3.29625  |
| 1 | Zfp429   | 0 | 0.294709 | 1.89143  | 2.61768  | 1.7985   | 2.92441  | 1.5845   | 2.22405  | 1.79652  | 3.28299 | 2.24019  |
| 1 | Cfap57   | 0 | 2.7501   | 3.63216  | 2.76072  | 2.42266  | 2.87579  | 3.27495  | 3.25379  | 3.32968  | 3.23517 | 3.44566  |
| 1 | Spef2    | 0 | 1.45993  | 2.04543  | 3.63643  | 1.81936  | 2.2715   | 3.5189   | 2.55597  | 2.52345  | 2.87371 | 2.26511  |
| 1 | Hydin    | 0 | 1.36042  | 1.67684  | 3.81512  | 2.50168  | 2.49353  | 3.00371  | 2.52964  | 1.61728  | 2.75412 | 2.19958  |
| 1 | lqck     | 0 | 0.832461 | 2.83559  | 2.77408  | 3.27043  | 2.62168  | 1.85995  | 1.32185  | 1.94843  | 2.01554 | 2.93388  |
| 1 | Upp1     | 0 | 1.40877  | 0.689039 | 0.683072 | 2.23399  | 2.27961  | 1.30173  | 3.0609   | 1.27296  | 1.69099 | 3.19208  |
| 1 | Hdc      | 0 | 2.30769  | 1.45737  | 1.76068  | 3.01627  | 1.68385  | 3.5081   | 0.694279 | 1.63921  | 2.16034 | 2.63502  |
| 1 | Gm2506   | 0 | -0.29511 | 0.096776 | -0.03985 | 1.59357  | 1.43079  | 0.6345   | 2.10919  | 2.5178   | 2.02832 | 1.43132  |
| 1 | Cfap70   | 0 | 3.04795  | 1.28391  | 2.73619  | 3.45232  | 3.01451  | 2.31492  | 2.90628  | 2.38516  | 1.71216 | 2.92421  |
| 1 | Cdr1     | 0 | 2.10445  | 2.82141  | 2.35159  | 2.65428  | 2.76292  | 3.79816  | 1.19051  | 2.67227  | 2.22432 | 2.96569  |

|   |          |   |          |          |          |          |          |          |          |          |          |          |
|---|----------|---|----------|----------|----------|----------|----------|----------|----------|----------|----------|----------|
| 1 | Erich2   | 0 | 2.09852  | 2.65608  | 1.49315  | 3.0184   | 2.38004  | 3.43153  | 2.9518   | 1.74445  | 3.46077  | 2.20218  |
| 1 | AF357425 | 0 | -0.03383 | 1.8206   | 2.19371  | 2.08129  | 2.01065  | 0.977485 | 0.006543 | 1.21052  | 2.90106  | 1.30606  |
| 1 | Gm3258   | 0 | 2.5838   | 1.4227   | 2.77071  | 2.60881  | 0.355135 | 2.69888  | 2.148    | 3.03202  | 2.02346  | 2.2832   |
| 1 | Tmem254a | 0 | -0.19701 | -0.32389 | 1.96384  | 1.48648  | 0.454504 | 1.79332  | 1.87954  | 2.47916  | 1.11947  | 0.133878 |
| 1 | Gpr50    | 0 | 2.87669  | 2.23158  | 2.86875  | 2.72613  | 2.20535  | 3.89539  | 3.3564   | 3.15895  | 2.15145  | 2.77696  |
| 1 | 4932438H | 0 | 1.07903  | 2.06566  | 2.99927  | 2.38083  | 2.15457  | 2.85747  | 2.22609  | 2.59269  | 3.79568  | 1.91717  |
| 1 | Lrrc23   | 0 | 3.02428  | 2.29587  | 3.10916  | 3.72167  | 2.18569  | 3.29055  | 1.91027  | 2.3698   | 2.78898  | 1.80041  |
| 1 | Apobec1  | 0 | 0.546727 | 0.264935 | -0.10715 | 0.928136 | 1.82102  | 2.92581  | 1.36752  | 1.60628  | 1.92212  | 2.39055  |
| 2 | Drd1     | 0 | -1.41282 | -0.83483 | -1.50043 | -1.21425 | -1.39051 | 0.698585 | 0.631095 | 0.719466 | 0.715469 | 0.700155 |
| 2 | Rxrg     | 0 | -1.31102 | -1.20281 | -1.58148 | -1.16705 | -1.35024 | 0.727542 | 0.71184  | 0.523711 | 0.671446 | 0.634932 |
| 2 | Sh3rf2   | 0 | -1.30078 | -0.96019 | -1.74985 | -0.87538 | -1.23971 | 0.579423 | 0.66186  | 0.897505 | 0.859629 | 0.55258  |
| 2 | Pde10a   | 0 | -1.38285 | -0.69682 | -1.43705 | -1.08145 | -1.51064 | 0.946982 | 0.832234 | 0.825815 | 0.531955 | 0.377925 |
| 2 | Gpr37    | 0 | -0.41681 | -0.48459 | -0.66283 | -0.21455 | 0.689018 | 0.504746 | 1.71596  | 1.65377  | 1.56273  | 1.97081  |
| 2 | Rasgrp2  | 0 | -0.17819 | -0.44313 | -1.28665 | -1.50071 | -1.0788  | 0.441125 | 1.01705  | 0.884929 | 1.22557  | 1.09044  |
| 2 | Tac1     | 0 | -0.74682 | -0.69114 | -0.79783 | -0.5895  | -0.74183 | 1.08903  | 1.22063  | 1.13969  | 1.46635  | 1.41385  |
| 2 | Gpr88    | 0 | -1.47102 | -0.99948 | -1.78758 | -1.36662 | -1.49201 | 0.477046 | 0.487901 | 0.466964 | 0.722919 | 0.444047 |
| 2 | Adora2a  | 0 | -1.46729 | -0.89377 | -1.64628 | -1.48812 | -1.74871 | 0.333796 | 0.672882 | 0.450137 | 0.568806 | 0.354681 |
| 2 | Rarb     | 0 | -1.29947 | -1.07932 | -1.31996 | -1.1699  | -1.41947 | 0.6835   | 0.67627  | 0.652058 | 0.885871 | 0.728283 |
| 2 | Drd2     | 0 | -1.34642 | -0.5241  | -1.60327 | -1.13355 | -1.49333 | 0.615305 | 0.745561 | 0.807686 | 0.603929 | 0.707127 |
| 2 | Stk26    | 0 | -0.50581 | -0.64943 | -0.83231 | -1.06177 | -0.51982 | 0.72812  | 0.970887 | 1.39179  | 1.70059  | 1.21198  |
| 2 | Plip     | 0 | -0.22386 | -0.6852  | -0.71518 | -0.44761 | 0.490725 | 0.733021 | 1.79505  | 1.33373  | 1.73129  | 1.7285   |
| 2 | Dach1    | 0 | -1.44911 | -0.82115 | -1.63536 | -0.92823 | -0.96365 | 0.906222 | 0.604476 | 0.908751 | 0.805475 | 0.65811  |
| 2 | Rgs9     | 0 | -1.489   | -0.56253 | -1.69448 | -1.23577 | -1.84006 | 0.783153 | 0.505761 | 0.536456 | 0.534349 | 0.057699 |
| 2 | Pthlh    | 0 | -1.7999  | -1.5643  | -1.56157 | -0.76503 | -0.70161 | 0.316373 | 0.226253 | 0.852658 | 0.572885 | 0.862566 |
| 2 | Ankrd63  | 0 | -0.38759 | -0.96211 | -2.24386 | -1.45464 | -1.63501 | 0.189049 | 0.609145 | 0.550731 | 0.462753 | 0.289875 |
| 2 | Slc35d3  | 0 | -1.62925 | -1.2093  | -1.85853 | -1.33714 | -1.03461 | 0.483618 | 0.710268 | 0.411215 | 0.576387 | 0.400922 |
| 2 | Pde1b    | 0 | -1.48891 | -0.79117 | -1.72804 | -1.36058 | -1.50348 | 0.276455 | 0.75843  | 0.712534 | 0.450871 | 0.517225 |
| 2 | Fgfr11   | 0 | -1.34596 | -2.00232 | -2.55251 | -0.12949 | 0.436901 | 0.024793 | 0.106154 | -0.38001 | 0.34553  | -0.07821 |
| 2 | Tek      | 0 | -1.83822 | -1.83625 | -2.53617 | -0.80731 | -0.11466 | 0.401997 | 0.105376 | 0.231966 | -0.09054 | -0.28302 |
| 2 | Ido1     | 0 | -1.13471 | -1.39628 | -1.54637 | -1.22484 | -0.4694  | 0.52026  | 0.741798 | 0.548769 | 1.15643  | 0.756774 |
| 2 | Scn4b    | 0 | -1.0835  | -0.53709 | -1.41474 | -1.48089 | -1.64672 | 0.498928 | 0.740548 | 0.726911 | 0.838313 | 0.560658 |
| 2 | 2810459M | 0 | -1.4079  | -1.84945 | -1.54556 | 0.083465 | 0.298351 | 0.465578 | 0.917371 | 0.477285 | 0.481318 | 0.855055 |
| 2 | Abca8a   | 0 | 0.113972 | 0.440578 | -0.73516 | 0.20531  | 0.618938 | -0.09175 | 0.779245 | 1.51795  | 1.41534  | 2.93543  |
| 2 | Gpr6     | 0 | -1.58126 | -0.98958 | -1.62185 | -1.47299 | -1.81164 | 0.240356 | 0.550444 | 0.535785 | 0.381259 | 0.457993 |
| 2 | Itga5    | 0 | -1.81085 | -1.33956 | -2.89416 | -1.9054  | -1.68383 | -0.01184 | -0.49298 | 0.072369 | -0.09945 | -0.59671 |



|   |           |   |          |          |          |          |          |          |          |          |          |          |
|---|-----------|---|----------|----------|----------|----------|----------|----------|----------|----------|----------|----------|
| 2 | H2-Aa     | 0 | -0.13131 | -0.34761 | -1.88494 | -0.10014 | 0.264935 | 0.082648 | 1.29016  | 1.26234  | 1.31261  | 1.47923  |
| 2 | Asic4     | 0 | -1.03774 | -0.69014 | -1.23586 | -1.83875 | -2.45879 | 0.013624 | 0.624935 | 0.169175 | 0.333813 | 0.269995 |
| 2 | Ppp1r1b   | 0 | -1.32385 | -0.75882 | -1.35097 | -1.53862 | -1.94674 | 0.431458 | 0.722274 | 0.383162 | 0.450769 | 0.588359 |
| 2 | Cdc42ep2  | 0 | -1.67854 | -2.05181 | -0.48903 | -1.47295 | -0.94756 | -0.14889 | 0.52299  | -0.26938 | 0.926324 | 0.759776 |
| 2 | Serpinb1a | 0 | -0.61735 | -0.99561 | -0.27667 | -0.76267 | 0.416677 | 0.303659 | 1.18873  | 1.53363  | 1.27192  | 1.94424  |
| 2 | Gpr52     | 0 | -2.08614 | -0.76614 | -0.59063 | -0.78857 | -1.20595 | 1.0058   | 0.596541 | 0.984758 | 0.52159  | 0.558292 |
| 2 | Cd4       | 0 | -1.59758 | -0.62302 | -1.54719 | -1.73777 | -1.69964 | 0.289616 | 0.780697 | 0.338444 | 0.459953 | 0.268879 |
| 2 | Cckbr     | 0 | -2.65481 | -2.50507 | -1.25033 | -1.4279  | -0.30665 | -0.8094  | -0.39087 | 0.077701 | 0.032893 | -0.05047 |
| 2 | Arpp21    | 0 | -2.43138 | -1.6312  | -2.26124 | -1.69412 | -1.43678 | 0.138129 | -0.17554 | 0.093114 | -0.14866 | -0.279   |
| 2 | Bche      | 0 | -1.08042 | -0.16495 | -1.14613 | -0.58607 | 0.294277 | 1.03617  | 1.26718  | 1.14614  | 1.38176  | 1.55007  |
| 2 | Clspn     | 0 | -1.6722  | -1.28565 | -1.80901 | -1.9247  | -1.17812 | 0.441178 | 0.024045 | 0.283545 | 0.677559 | 0.170012 |
| 2 | Slc5a7    | 0 | -0.93364 | -0.68451 | -0.87264 | -0.10512 | 0.211431 | 1.68829  | 1.21617  | 1.28749  | 1.04386  | 1.60298  |
| 2 | Rpe65     | 0 | 0.226287 | 0.156333 | 0.450806 | -1.62483 | 0.888013 | -0.07778 | 0.840753 | 1.80774  | 1.4945   | 1.82729  |
| 2 | Opalin    | 0 | -0.63135 | -0.80492 | -1.2654  | -0.76698 | 0.065117 | 0.179252 | 1.28772  | 1.19815  | 1.30633  | 1.52498  |
| 2 | Penk      | 0 | -1.67261 | -1.42499 | -2.1251  | -1.21984 | -1.40154 | 0.298965 | 0.367083 | 0.216559 | 0.63687  | 0.12879  |
| 2 | Gprin3    | 0 | -1.72467 | -0.27793 | -0.83577 | -0.87944 | -1.20833 | 1.44395  | 0.50311  | 1.095    | 0.505275 | 0.536909 |
| 2 | Ogn       | 0 | -0.22473 | -0.30282 | -1.548   | -0.81787 | 0.536465 | 1.54756  | 0.990455 | 1.0531   | 1.11092  | 1.44661  |
| 2 | Gadd45b   | 0 | 1.44855  | -0.84112 | -1.29667 | -1.88618 | -0.83367 | -0.42562 | 0.242296 | -0.0915  | 0.223801 | 1.19509  |
| 2 | Gng11     | 0 | -0.63633 | -0.80152 | -0.58569 | -1.03857 | 0.589023 | -0.27702 | 0.682583 | 0.659369 | 2.07921  | 1.52361  |
| 2 | Ier5l     | 0 | 1.02405  | -1.58123 | -1.51739 | -2.03209 | -1.20025 | -0.73073 | -0.07794 | -0.41783 | -0.79837 | 0.958647 |
| 2 | Pcdhga8   | 0 | -1.1571  | -0.88443 | -0.27743 | -1.46708 | -0.3682  | -0.2537  | 0.603982 | 1.10317  | 0.171467 | 1.96655  |
| 2 | Actn2     | 0 | -1.78824 | -1.02992 | -1.90233 | -1.81257 | -2.04406 | 0.350035 | 0.268704 | 0.185778 | 0.131207 | -0.23803 |
| 2 | Rem2      | 0 | -0.13981 | -0.91083 | -1.25036 | -1.55644 | -1.09842 | 0.311027 | 1.00822  | 1.03949  | 0.852599 | 1.04056  |
| 2 | Insc      | 0 | -1.2882  | -2.17308 | -1.7319  | -1.0587  | -0.57949 | -0.12632 | 0.292429 | 0.448698 | 0.602162 | 0.785321 |
| 2 | Egr1      | 0 | -1.52052 | -0.58618 | -1.89891 | -0.44616 | 0.432249 | 0.355724 | 0.650025 | 0.772076 | 0.770003 | 1.27209  |
| 2 | Slc10a4   | 0 | -1.26609 | -0.13308 | -0.9122  | -0.83411 | -0.35496 | 0.459904 | 1.50717  | 0.592438 | 0.996048 | 1.79144  |
| 2 | Serpina9  | 0 | -1.02191 | -0.87079 | -2.06788 | -1.2844  | -2.02785 | 0.226929 | 0.353312 | 0.332757 | 0.565231 | 0.42139  |
| 2 | Col6a2    | 0 | -1.81543 | -0.09668 | -1.76449 | -2.7284  | -2.3214  | -0.21478 | -0.71069 | 0.098973 | -1.32544 | -0.54854 |
| 2 | H2-Q1     | 0 | -0.18883 | -1.3378  | -1.06466 | -1.34392 | -0.6907  | 0.279769 | 0.9101   | 0.89134  | 1.74596  | 0.202156 |
| 2 | Lrrc10b   | 0 | -1.18143 | 0.164876 | -1.33658 | -1.33663 | -1.86602 | 0.572416 | 1.06221  | 0.445874 | 0.244471 | 0.644596 |
| 2 | Gng7      | 0 | -1.79844 | -0.95522 | -1.88647 | -1.79618 | -1.98505 | 0.217877 | 0.4224   | 0.201718 | 0.014133 | 0.045115 |
| 2 | Klf10     | 0 | 0.553362 | -1.28595 | -1.78775 | -0.88464 | 0.269823 | -0.88954 | -0.39141 | 0.119177 | 1.00875  | 1.5159   |
| 2 | 2810001G  | 0 | 0.241096 | -1.05417 | -0.36974 | -0.07999 | -0.17409 | 1.31724  | 0.759383 | 0.647837 | 1.97356  | 2.17102  |
| 2 | Slc22a8   | 0 | -2.06829 | -2.62393 | -2.35195 | -1.42668 | -0.90333 | -1.46519 | -0.26372 | 0.119909 | -0.03569 | -0.46941 |
| 2 | Mob3b     | 0 | -2.5617  | -2.17062 | -1.83656 | -0.61877 | -0.03946 | -0.40424 | -0.36347 | 0.057673 | 0.214654 | 0.031626 |

|   |          |   |          |          |          |          |          |          |          |          |          |          |
|---|----------|---|----------|----------|----------|----------|----------|----------|----------|----------|----------|----------|
| 2 | Aebp1    | 0 | -1.04034 | -0.93344 | -1.23896 | -2.11212 | -1.3555  | -0.09306 | 0.835365 | 0.765077 | 0.113705 | 0.764723 |
| 2 | Ano2     | 0 | -2.19599 | -0.31968 | -0.59312 | -1.18939 | -1.50748 | 0.216506 | 0.816955 | 0.707565 | 0.192344 | 0.801234 |
| 2 | Gas1     | 0 | -1.09938 | -1.85955 | -1.35128 | -1.79792 | -0.04522 | 0.296148 | 0.530135 | 0.37513  | 0.327621 | 0.942557 |
| 2 | Egr4     | 0 | -0.83054 | -0.31147 | -1.86823 | -0.77857 | -0.05967 | 0.423863 | 1.10638  | 0.449319 | 0.556227 | 1.79423  |
| 2 | Sertad1  | 0 | 0.231704 | -1.79949 | -1.71769 | -1.92684 | -0.87013 | -0.41634 | -0.04892 | -0.22031 | 0.082812 | 1.30087  |
| 2 | Thbs4    | 0 | 0.36472  | 1.07139  | 1.33484  | -1.77528 | -1.64516 | 0.203254 | 0.917819 | 0.55589  | 0.050067 | 0.111715 |
| 2 | Gm715    | 0 | 1.07134  | 0.067511 | -0.41198 | -1.33475 | -0.04878 | 0.826688 | 1.98233  | 1.41566  | 1.75617  | 0.706229 |
| 2 | Tcea3    | 0 | -0.79296 | -0.564   | -1.73855 | 0.490282 | 0.624263 | 0.943122 | 1.47222  | 0.963594 | 0.73033  | 1.42449  |
| 2 | Itm2a    | 0 | -1.18671 | -1.7325  | -2.29253 | -0.80012 | 0.492957 | -0.33981 | 0.386343 | 0.46102  | 0.593976 | 0.351854 |
| 2 | Tmem51   | 0 | -0.02235 | -1.59572 | -0.9156  | -0.17275 | -1.27032 | 0.616049 | 1.58149  | 0.629982 | 0.558383 | 1.18937  |
| 2 | Thbs1    | 0 | 0.442566 | 0.448972 | -0.68461 | -0.11622 | -0.05808 | 1.88019  | 1.66553  | 1.84818  | 1.77679  | 1.97185  |
| 2 | Egr2     | 0 | -1.78164 | -0.57652 | -1.60528 | -0.28692 | 0.513391 | 0.290405 | 0.577102 | 0.604453 | 0.893477 | 1.41055  |
| 2 | Gata3    | 0 | 0.182787 | 0.298915 | -0.76661 | -1.1753  | -0.23678 | 1.31107  | 1.01931  | 1.66714  | 1.65251  | 1.51844  |
| 2 | Fam78a   | 0 | 0.223957 | -0.26146 | -2.38951 | -1.82951 | -1.64603 | -2.1575  | -1.22141 | -0.53975 | -0.19632 | 0.35514  |
| 2 | Ntng2    | 0 | -1.3167  | -0.55364 | -2.36671 | -3.4352  | -1.954   | -2.50915 | -1.66375 | -2.38853 | -2.82137 | -2.30032 |
| 2 | Asb11    | 0 | -1.43246 | -0.61364 | -0.58448 | -0.49002 | -0.96497 | 0.826263 | 0.292527 | 0.30126  | 1.27254  | 1.89826  |
| 2 | Klf4     | 0 | 0.718727 | -1.51144 | -2.62003 | -0.86973 | -1.18821 | -1.4216  | -1.35424 | -1.0377  | -0.22798 | 0.615211 |
| 2 | Rab7b    | 0 | -1.54936 | -2.12474 | -2.46403 | -1.79989 | -0.27642 | 0.314251 | -0.50483 | -0.83896 | 0.480591 | -0.56381 |
| 2 | C030029H | 0 | -0.18785 | -0.95803 | -1.33455 | -0.93237 | 0.468483 | -1.06296 | 0.192339 | 0.18524  | 1.9341   | 1.12462  |
| 2 | ND3      | 0 | 0.668589 | -0.61057 | -0.45337 | -0.29132 | 0.378461 | 1.02954  | 0.979254 | 0.901495 | 2.48728  | 2.10594  |
| 2 | Dusp10   | 0 | -0.5794  | -1.1448  | -2.96196 | -0.26124 | -1.2367  | 0.611175 | 0.652754 | -0.2541  | -0.62724 | -0.26381 |
| 2 | Baz1a    | 0 | -1.31932 | -2.29913 | -1.08583 | -0.9636  | -1.01016 | 0.390649 | -1.38633 | 0.578721 | 0.719603 | 0.402162 |
| 2 | Slc22a6  | 0 | -1.6108  | -2.10314 | -2.44519 | -1.89461 | -1.64145 | -0.78926 | -0.00836 | 0.054334 | -0.66316 | 0.364956 |
| 2 | Lrrc75a  | 0 | 0.400017 | -1.10486 | -2.59255 | -0.59675 | 0.384214 | -0.2806  | -0.14366 | 0.368312 | 0.998087 | 0.694341 |
| 2 | Olf287   | 0 | -0.63257 | 0.22535  | -1.12403 | -3.34587 | -0.69367 | 0.199314 | -0.24145 | -0.38666 | -0.49746 | -0.04198 |
| 2 | Fos      | 0 | -0.33056 | -0.2658  | -1.73579 | -0.21943 | 0.744643 | 0.395546 | 0.944031 | 0.671875 | 1.63374  | 1.79989  |
| 2 | Fxyd1    | 0 | 0.129112 | -0.73095 | -0.08098 | -0.42653 | 0.761603 | 0.457077 | 1.67005  | 0.372895 | 1.25382  | 2.71647  |
| 2 | Nr4a1    | 0 | -0.6078  | -0.09013 | -1.43159 | -0.40593 | 0.722126 | 0.582254 | 1.0585   | 0.8371   | 1.60037  | 1.94295  |
| 2 | Dmkn     | 0 | 0.922968 | 0.14634  | 0.325516 | -0.83066 | 0.34315  | 1.47419  | 1.29867  | 0.586843 | 2.23959  | 2.53463  |
| 2 | Rtn4rl2  | 0 | 0.874019 | -0.4916  | -2.05929 | -1.32674 | -2.44057 | -1.56074 | -0.62358 | -0.98215 | -1.99295 | -0.30439 |
| 2 | Slc9a2   | 0 | -1.55606 | -0.73965 | -2.95616 | -1.85765 | -1.95714 | -0.13065 | -0.79613 | -0.5945  | 0.201405 | -0.12759 |
| 2 | Dact2    | 0 | -1.30525 | -2.0685  | -2.17507 | -3.03303 | -2.04086 | -1.28034 | 0.081753 | -0.78482 | -1.0738  | -0.20888 |
| 2 | Bfsp2    | 0 | 0.507349 | -0.71927 | -1.24286 | -1.55093 | -0.07182 | 0.234398 | 0.495276 | 1.62431  | 1.1416   | 1.11426  |
| 2 | Myoc     | 0 | -1.42273 | -1.75905 | -2.48668 | -3.08946 | -0.81725 | -2.09688 | -0.22585 | -0.46628 | -1.48626 | -0.45019 |
| 2 | Cyp2s1   | 0 | 0.373959 | 0.744431 | -0.35535 | -0.59101 | -0.85252 | 0.748323 | 1.58058  | 1.48834  | 2.38841  | 0.995605 |

|   |            |   |          |          |          |          |          |          |          |          |          |          |
|---|------------|---|----------|----------|----------|----------|----------|----------|----------|----------|----------|----------|
| 2 | Pcdhb2     | 0 | -0.03546 | 1.22053  | 0.9242   | -1.1115  | -0.36745 | 1.05892  | 0.367938 | 1.55724  | 0.56829  | 2.52357  |
| 2 | Klf2       | 0 | 0.331834 | -2.1405  | -2.9382  | -1.90729 | -1.07144 | -1.50926 | -1.2875  | -1.71473 | -1.118   | -0.00907 |
| 2 | Trib2      | 0 | -2.80044 | -0.19256 | -2.38781 | 0.064489 | 0.308912 | -0.33314 | -0.63733 | -0.5299  | -0.40815 | -0.30242 |
| 2 | Osr1       | 0 | -2.10229 | -1.9524  | -1.88248 | -2.47045 | -1.07304 | 0.298352 | -0.09552 | -0.61632 | -1.43713 | 0.04728  |
| 2 | TrnV       | 0 | 0.376085 | -0.95964 | -0.51847 | -0.19836 | 0.270649 | 1.25929  | 0.683795 | 0.501623 | 1.8253   | 2.41362  |
| 2 | St6galnac5 | 0 | -2.04703 | -2.25751 | -4.10515 | -2.40027 | -2.61974 | -2.14085 | -1.80609 | -1.41213 | -2.48649 | -1.40206 |
| 2 | Pcsk9      | 0 | -1.21449 | -0.97548 | -1.74881 | -3.54919 | -1.93629 | -1.32471 | -0.37505 | -1.273   | -0.24914 | -0.46342 |
| 2 | Rprml      | 0 | -0.53485 | -0.34104 | -0.91183 | -2.25361 | -2.75322 | -1.46716 | -1.42839 | -2.75126 | -2.46173 | -0.7524  |
| 2 | Rtn4r      | 0 | -0.35429 | -2.04727 | -1.26954 | -2.83033 | -3.02413 | -2.42674 | -0.80151 | -1.04878 | -1.88719 | -0.95803 |
| 2 | Ptgs2      | 0 | -0.79426 | 2.30847  | -0.23602 | 1.04121  | 0.181673 | 0.360182 | 0.232714 | 1.34191  | 0.381758 | 2.3158   |
| 2 | Upb1       | 0 | 0.30796  | 0.685643 | -0.44213 | -0.32239 | -1.13534 | 1.77449  | 1.65156  | 1.66167  | 1.591    | 0.681504 |
| 2 | Adamts8    | 0 | -0.68417 | -2.3049  | -2.74877 | -0.29185 | -0.10243 | -1.44527 | 0.42442  | -0.20468 | -0.94849 | -1.36196 |
| 2 | Ppic       | 0 | -3.01662 | -0.46215 | -2.18432 | -2.59707 | -1.79971 | -0.30285 | -0.844   | -0.49811 | -1.08663 | -1.02082 |
| 2 | Hs3st2     | 0 | 0.201091 | -1.17074 | -3.39353 | -1.14429 | -0.18012 | -0.98852 | 0.032986 | -0.48796 | -0.74618 | -1.21117 |
| 2 | Atp8b1     | 0 | -2.10724 | -2.35203 | -1.09679 | -0.13277 | -0.21157 | -0.7163  | -0.27739 | 0.728047 | -0.09837 | 0.682135 |
| 2 | Arhgap33   | 0 | -1.7162  | -0.95815 | -2.61311 | -3.12922 | -3.25421 | -2.11478 | -1.58203 | -1.90236 | -3.17485 | -2.28376 |
| 2 | Clec11a    | 0 | -1.47583 | -2.61729 | -2.27582 | -1.83803 | -2.69068 | -3.546   | -3.44383 | -2.2403  | -1.62638 | -1.51171 |
| 2 | Adamts13   | 0 | -2.51483 | -2.13013 | -3.04204 | -2.61083 | -1.60844 | -0.81732 | -0.8674  | -0.93973 | -0.4928  | -0.7571  |
| 2 | Bmp6       | 0 | 1.71303  | 1.42221  | 0.892137 | 0.050524 | 1.10786  | 1.46473  | 2.17246  | 2.95012  | 0.636008 | 2.88014  |
| 2 | Ushbp1     | 0 | -0.47708 | -2.97855 | -2.04158 | 0.723654 | -0.61276 | -0.40959 | -0.74538 | -0.56114 | -0.16311 | -0.49818 |
| 2 | C03003412  | 0 | -0.84614 | -0.37974 | -1.98976 | -3.26657 | -1.95335 | -0.23283 | -0.51685 | -0.35442 | -0.51177 | -0.69243 |
| 2 | Slc2a5     | 0 | -0.55929 | -0.62505 | -2.34084 | -0.68574 | 0.355535 | -2.00413 | 0.777482 | -0.33861 | 0.748608 | -0.12406 |
| 2 | Fosb       | 0 | 1.20368  | 1.66608  | -0.79704 | 0.159187 | -0.13698 | 0.134905 | 0.254139 | 1.63079  | 0.898392 | 2.61455  |
| 2 | Irak3      | 0 | -0.01538 | 2.59722  | -0.26753 | -0.9157  | 0.188241 | -0.40506 | 1.08553  | 1.37106  | 0.245457 | 1.15526  |
| 2 | Kcnk4      | 0 | -0.29733 | -0.99846 | -1.34904 | -1.56551 | -2.70217 | -1.14559 | 0.046497 | -0.35402 | -2.4608  | 0.230657 |
| 2 | Relb       | 0 | -0.08247 | -0.38943 | -2.53464 | -1.75864 | -1.94205 | -0.77065 | -0.17032 | -0.16532 | -0.6719  | 0.859214 |
| 2 | Prrt1      | 0 | -0.05749 | 0.118462 | -1.56864 | -1.72696 | -2.2069  | -1.15089 | -0.21539 | -1.311   | -2.95161 | -0.73922 |
| 2 | Krt80      | 0 | 0.318498 | -0.17313 | -0.9501  | -2.6746  | -2.43762 | -0.30463 | -0.4598  | -0.40752 | 0.194037 | -1.04736 |
| 2 | Cd74       | 0 | -0.58731 | -0.44342 | -1.27325 | -1.19618 | 0.122419 | -0.81617 | 1.84395  | 1.25427  | 0.545441 | 0.675184 |
| 2 | Npas4      | 0 | -1.36401 | -0.74934 | -1.89902 | -1.02729 | -0.10439 | 0.457674 | 0.894659 | 0.843941 | 1.00289  | 0.587435 |
| 2 | She        | 0 | -2.09953 | -2.69483 | -2.90369 | -0.89097 | -0.82136 | -1.09426 | 0.021427 | -0.39247 | -0.7525  | -1.35412 |
| 2 | Dbp        | 0 | -0.91767 | -1.36044 | -1.05711 | -2.41777 | -1.14593 | -1.60286 | 0.482949 | -1.12831 | -2.83056 | -0.00664 |
| 2 | Rpl14-ps1  | 0 | -2.63237 | -1.7484  | 0.044773 | -2.64315 | -2.43133 | -2.65667 | -1.36664 | -1.13984 | -1.11381 | -1.03575 |
| 2 | Grp        | 0 | -1.91394 | -2.82605 | -2.40128 | -3.28574 | -3.1637  | -2.24806 | -1.82513 | -1.69926 | -1.8033  | -0.61252 |
| 2 | Lum        | 0 | -1.97449 | -1.91889 | -2.11987 | -2.49413 | -0.78132 | -0.07278 | 0.200183 | -0.88536 | -0.2998  | -0.05074 |

|   |          |   |          |          |          |          |          |          |          |          |          |          |
|---|----------|---|----------|----------|----------|----------|----------|----------|----------|----------|----------|----------|
| 2 | Acot5    | 0 | -1.55736 | -0.19739 | -0.80486 | -1.95629 | -1.31355 | -2.49377 | -1.43015 | -0.66561 | -2.73259 | 0.328981 |
| 2 | Pak6     | 0 | -2.78302 | -2.09216 | -2.7349  | -2.23181 | -2.79455 | -2.92366 | -1.85725 | -1.44031 | -3.85503 | -2.8073  |
| 2 | Nr4a2    | 0 | -2.32215 | -2.03602 | -3.14257 | -2.94795 | -1.82147 | -1.21477 | -0.83144 | -1.63912 | -1.26872 | -0.32222 |
| 2 | Myom3    | 0 | -3.46334 | -2.64067 | -2.53196 | -1.889   | -1.351   | -1.36898 | -1.89213 | -1.05672 | -0.38858 | -1.59682 |
| 2 | Slc22a3  | 0 | -2.80601 | -1.3858  | -1.72393 | -1.93056 | -1.60469 | -0.20268 | 0.04361  | -0.02794 | -0.00485 | -0.51138 |
| 2 | Trpv4    | 0 | 1.28578  | 0.79444  | -0.08016 | 0.501292 | -1.03747 | 0.272518 | 1.99551  | 1.94848  | 1.53934  | 1.95027  |
| 2 | Nr2f6    | 0 | 0.191134 | -0.208   | -1.22822 | -2.65098 | -2.22848 | -0.71201 | 0.017621 | -0.91652 | -1.25399 | 0.41902  |
| 2 | Snurf    | 0 | 1.19408  | 0.610924 | 0.000243 | -0.02909 | 0.335938 | 0.119845 | 1.25657  | 1.18617  | 2.42173  | 2.87386  |
| 2 | Cyr61    | 0 | -1.16914 | -2.65531 | -3.2704  | -2.70318 | -2.44696 | -1.91109 | -1.14701 | -1.44711 | -0.86513 | -0.81666 |
| 2 | Foxq1    | 0 | 0.301132 | -0.68145 | -0.18424 | -0.02188 | 0.300654 | 1.06471  | 1.1297   | 1.43003  | 1.60227  | 2.77735  |
| 2 | Nr4a3    | 0 | -1.58151 | -0.50514 | -1.75597 | -0.20352 | 0.202591 | -0.30242 | -0.20661 | 0.172347 | 0.27502  | 2.03841  |
| 2 | Arhgef19 | 0 | -0.70679 | -2.04844 | -2.85555 | -2.12669 | -3.08515 | -0.85981 | -0.71369 | -1.95538 | -1.69771 | -0.603   |
| 2 | Phlda3   | 0 | 1.74171  | 1.23493  | 0.694795 | -0.0932  | -0.08293 | 0.819453 | 2.66572  | 1.59559  | 1.52285  | 2.66799  |
| 2 | Zdhhc23  | 0 | -3.24898 | -1.46808 | -2.55696 | -2.06612 | -3.00214 | -0.86891 | -1.66287 | -1.33744 | -2.99118 | -2.23028 |
| 2 | H2-Eb1   | 0 | 1.19233  | -0.28905 | 0.422337 | 0.031867 | -0.76711 | -0.24954 | 2.04153  | 1.86015  | 0.45483  | 1.96638  |
| 2 | Icam5    | 0 | -1.1493  | -1.00493 | -1.3889  | -3.59109 | -2.99644 | -1.42251 | -0.95699 | -1.47171 | -2.15888 | -1.20527 |
| 2 | Cited4   | 0 | -2.3252  | -2.9362  | -1.76025 | -1.23188 | -1.8763  | -0.48637 | -0.29564 | -0.61802 | -0.64986 | 0.084408 |
| 2 | Foxo6    | 0 | 1.11349  | 0.164318 | -2.46134 | -1.22923 | -1.21644 | -1.01049 | -0.08083 | -0.87957 | -0.4474  | 0.609326 |
| 2 | Frat2    | 0 | -0.57561 | -3.25531 | -1.24375 | -0.27847 | -0.87345 | -1.16334 | -1.60179 | -1.15004 | 0.578623 | -0.42866 |
| 2 | Anpep    | 0 | -3.05367 | -2.56946 | -2.76774 | -2.96365 | -3.05852 | -1.32143 | -1.22957 | -1.81505 | -2.80923 | -2.8515  |
| 2 | Sphk1    | 0 | -1.55329 | -2.61748 | -2.50262 | -2.46786 | -2.84992 | -1.91015 | -0.79832 | -0.32802 | -2.53802 | -1.20082 |
| 2 | Hmga1    | 0 | -0.67694 | -0.98274 | -1.75843 | -1.75239 | -3.51427 | -1.54464 | -0.53246 | -0.63894 | -2.48597 | -1.07496 |
| 2 | Dusp1    | 0 | -0.5112  | -0.60775 | -2.3671  | -1.22872 | 0.102764 | -0.02589 | 0.407365 | 0.343199 | 0.834518 | 1.2493   |
| 2 | Sstr2    | 0 | 0.280527 | -0.9566  | -3.20056 | -0.8472  | -0.5764  | -0.99184 | 0.203189 | -0.16867 | -0.08309 | 0.2261   |
| 2 | Id1      | 0 | -0.31213 | -2.93853 | -2.26327 | -2.13238 | -2.5012  | -1.83832 | -1.86764 | -2.49953 | -1.49903 | -0.35888 |
| 2 | Ehd2     | 0 | -0.43698 | -0.06265 | -0.69182 | -2.84653 | -1.75423 | -0.41417 | 0.178918 | 0.476707 | -1.73671 | -0.62284 |
| 2 | Edn3     | 0 | -2.45839 | -3.65207 | -2.67579 | -1.94425 | -0.41752 | -1.8193  | -1.60467 | -1.49783 | -1.98226 | -1.6104  |
| 2 | Lin7b    | 0 | -0.06934 | -1.07373 | -1.79015 | -2.59437 | -1.41076 | -1.32329 | 0.490127 | -0.50551 | -0.41102 | 0.632519 |
| 2 | Hba-a1   | 0 | -0.90531 | -0.37038 | -2.96971 | -1.7418  | -1.77777 | -2.06162 | -0.97256 | -0.17823 | -1.98364 | 0.057542 |
| 2 | Alas2    | 0 | -1.86409 | -0.86664 | -3.07685 | -1.80748 | -0.65504 | -1.28245 | 0.602621 | -0.64315 | -1.59853 | -1.53801 |
| 2 | Fibcd1   | 0 | -1.30907 | -1.21902 | -2.39127 | -3.20489 | -3.31597 | -1.20671 | -1.64807 | -1.72273 | -1.42916 | -0.65878 |
| 2 | Fmod     | 0 | -1.42497 | -0.49018 | -1.87152 | -2.66732 | -2.01188 | 0.250123 | -0.03663 | 0.156968 | -1.03359 | -0.39766 |
| 2 | Nptx2    | 0 | -0.92641 | -1.36253 | -3.17164 | -1.63022 | -2.75367 | -3.47016 | -2.0149  | -1.81101 | -2.35662 | -1.6837  |
| 2 | TrnH     | 0 | -0.59267 | -2.92644 | -0.50709 | 0.178599 | -1.04147 | 0.469771 | -0.55636 | -0.6484  | -0.30751 | 0.956858 |
| 2 | Map3k19  | 0 | -0.55075 | -0.0764  | -1.21742 | -2.16987 | -1.69197 | -0.83822 | -1.09973 | -0.60232 | -3.24405 | -0.07814 |

|   |         |   |          |          |          |          |          |          |          |          |          |          |
|---|---------|---|----------|----------|----------|----------|----------|----------|----------|----------|----------|----------|
| 3 | Map3k6  | 0 | 1.38451  | 2.03175  | 1.72767  | 0.835922 | 0.196294 | -0.55116 | -0.5366  | -0.58882 | -0.74618 | -0.02618 |
| 3 | Xdh     | 0 | 1.34729  | 2.84495  | 2.0008   | 1.04108  | 0.715394 | 0.228304 | 0.555429 | -0.06212 | -0.58609 | 0.214257 |
| 3 | Usp54   | 0 | 0.975295 | 2.01562  | 2.06082  | 0.995185 | -0.03031 | 0.239859 | -0.34496 | -0.03794 | -0.97339 | -0.57104 |
| 3 | Gm4285  | 0 | -0.92204 | 0.051543 | -0.1579  | 1.72256  | 1.38439  | 0.2245   | -1.41622 | -0.93112 | -0.61739 | -1.10342 |
| 3 | Ctla2a  | 0 | 1.22236  | 1.15807  | 1.76873  | 0.741402 | 0.575494 | -0.58787 | -1.03352 | -0.89467 | -0.47184 | -0.96298 |
| 3 | F2r     | 0 | 1.24489  | 1.58934  | 2.01927  | 2.06356  | 1.6038   | 0.30107  | 0.830153 | -0.08989 | -0.91871 | -0.10568 |
| 3 | Atp2c2  | 0 | 0.500254 | 1.3573   | 2.03964  | 0.680989 | -0.40616 | -0.25125 | -1.17974 | -0.2827  | -0.39416 | -1.22186 |
| 3 | Osmr    | 0 | 0.268285 | 2.89317  | 1.49655  | 1.41713  | 0.380392 | 0.573644 | -0.32398 | -0.0824  | -0.47403 | 0.059699 |
| 3 | Itgad   | 0 | 1.27969  | 2.22068  | 2.64868  | 1.77633  | 0.326433 | 0.946762 | 0.582749 | 0.526752 | -0.64331 | 0.176681 |
| 3 | Sdc4    | 0 | 1.08756  | 1.92344  | 1.72445  | 0.88495  | -0.13602 | -0.52167 | -0.17097 | -0.49451 | -1.03057 | -0.6122  |
| 3 | Acer2   | 0 | 0.588061 | 1.91313  | 2.54224  | 0.877003 | 0.554329 | -0.54716 | -0.34067 | -0.47158 | -0.32028 | 0.601752 |
| 3 | Tead1   | 0 | 0.110052 | 1.93944  | 2.63101  | -0.09099 | 0.036331 | 0.533049 | -0.1066  | 0.029406 | -0.24998 | -0.69893 |
| 3 | Nde1    | 0 | 0.432251 | 1.255    | 2.23356  | 0.340127 | -0.5229  | -0.56341 | -0.65487 | -0.54068 | -0.82957 | -1.06493 |
| 3 | Synpo2  | 0 | 0.38654  | 0.893423 | 1.03162  | 1.23832  | 0.328042 | -0.64179 | -0.47505 | -1.08798 | -1.60204 | -1.46116 |
| 3 | Tnnc1   | 0 | 0.419762 | -0.91446 | -0.08534 | 0.123728 | 0.407219 | -1.52264 | -1.94262 | -2.01035 | -1.33611 | -2.00747 |
| 3 | Mfsd2a  | 0 | 0.86743  | 1.44691  | 1.59708  | 0.406279 | -0.90606 | -0.59797 | -0.72309 | -0.78138 | -1.092   | -0.99441 |
| 3 | Plin4   | 0 | 1.37847  | 1.7319   | 1.79917  | 1.16174  | -0.42288 | 0.571068 | -0.46766 | -0.54425 | -0.76362 | -0.54261 |
| 3 | Vipr2   | 0 | 0.583995 | 0.424174 | 0.787755 | 0.324206 | 0.402148 | -1.41075 | -1.49213 | -1.31906 | -1.78264 | -1.20665 |
| 3 | Ccdc3   | 0 | -0.27428 | 0.370033 | 1.1725   | -0.01472 | -0.37613 | -1.13358 | -1.48682 | -1.96603 | -1.6971  | -1.56446 |
| 3 | Hif3a   | 0 | 1.09705  | 1.62938  | 1.31087  | 0.958816 | -0.08135 | -0.06796 | -0.47851 | -1.02289 | -1.33979 | -0.75184 |
| 3 | Tfcp2l1 | 0 | 1.17679  | 2.06833  | 2.52155  | 0.990498 | 1.00993  | 0.86969  | -0.12616 | -0.13417 | -0.6689  | -0.09466 |
| 3 | Abi3bp  | 0 | 0.261394 | -0.0434  | 0.180287 | 0.386219 | 0.817682 | -1.83126 | -1.19904 | -1.30205 | -1.70439 | -1.79253 |
| 3 | Rspo2   | 0 | -2.17266 | -2.55695 | -3.49958 | -2.08379 | -0.86753 | -2.53949 | -2.56369 | -2.05134 | -3.33758 | -2.13486 |
| 3 | Sgk3    | 0 | 0.355579 | 2.47936  | 3.2306   | 1.49291  | 0.248646 | 1.00977  | 0.337094 | 0.915246 | 1.20415  | 0.565576 |
| 3 | Fam19a4 | 0 | 0.237562 | 0.311455 | 2.01994  | 1.88435  | 1.00867  | -0.76694 | -0.41314 | -0.43962 | -0.68218 | -0.60986 |
| 3 | Pla2g3  | 0 | 1.18387  | 2.06884  | 2.09448  | 1.39062  | -0.00619 | 0.572599 | -0.3742  | -0.40454 | -0.42831 | -0.38539 |
| 3 | Zfp488  | 0 | 0.192107 | 0.629955 | 0.757973 | 0.610785 | 0.19488  | -0.90289 | -1.56154 | -1.67665 | -1.08577 | -1.8199  |
| 3 | Scube1  | 0 | 0.004798 | -0.19667 | -0.58625 | -0.55977 | -0.88054 | -1.85698 | -1.77881 | -2.16475 | -2.30034 | -2.71902 |
| 3 | Acss3   | 0 | 0.91665  | 2.03091  | 3.24884  | 1.93185  | 1.49027  | 1.34389  | 0.913792 | 0.887081 | -0.44957 | 0.974664 |
| 3 | Grk4    | 0 | 0.146106 | 0.294139 | 0.443184 | 0.410478 | 0.270088 | -0.83447 | -1.7906  | -2.17635 | -0.7336  | -1.82515 |
| 3 | Cdh19   | 0 | 0.842467 | 1.79748  | 2.31727  | 1.22184  | 1.01997  | 0.645269 | -0.51333 | -0.2445  | -0.77883 | -0.30072 |
| 3 | Plce1   | 0 | 0.319896 | 1.51484  | 2.53817  | 2.16268  | 0.301929 | 1.72675  | 0.835549 | 0.651784 | -0.71744 | 0.202565 |
| 3 | Sstr3   | 0 | 0.03779  | -1.34994 | -1.32865 | -1.58863 | -1.25532 | -2.67474 | -2.9679  | -2.42856 | -1.87584 | -2.44905 |
| 3 | Nmbr    | 0 | 0.118433 | 0.166286 | 0.64831  | 0.648382 | 0.428799 | -0.95005 | -1.16561 | -1.4998  | -1.89003 | -1.85944 |
| 3 | Rgs1    | 0 | 0.310575 | 0.820787 | -0.21185 | -0.06714 | -0.37742 | -1.12589 | -1.93755 | -1.95239 | -1.64011 | -1.8299  |

|   |            |   |          |          |          |          |          |          |          |          |          |          |
|---|------------|---|----------|----------|----------|----------|----------|----------|----------|----------|----------|----------|
| 3 | Mrgpra6    | 0 | 0.068679 | 0.513732 | 0.595633 | 0.357034 | 0.275049 | -1.28187 | -1.69978 | -1.67984 | -1.29068 | -1.84802 |
| 3 | Tmbim7     | 0 | 0.270717 | 0.32361  | 0.668758 | 0.093341 | -0.19842 | -1.71606 | -1.78265 | -1.6606  | -0.95524 | -1.97541 |
| 3 | Cdhr1      | 0 | 0.555703 | 0.229461 | 0.428533 | 0.598281 | 0.808339 | -1.41576 | -1.45524 | -1.41046 | -1.53051 | -1.37229 |
| 3 | Tnfrsf10b  | 0 | -0.00045 | 0.896407 | 0.709495 | 0.479374 | -0.28159 | -1.06555 | -1.65901 | -1.81427 | -0.82282 | -1.76058 |
| 3 | Olf856-ps: | 0 | -0.01834 | 0.741622 | 0.274484 | 0.481912 | 0.323512 | -1.64435 | -1.43334 | -1.73739 | -0.62012 | -1.91712 |
| 3 | Gabra2     | 0 | -0.86934 | -0.54483 | 0.375648 | 0.689313 | 0.531945 | -1.39501 | -1.82377 | -1.68509 | -1.55718 | -1.89224 |
| 3 | Ybey       | 0 | 0.341348 | 0.645631 | 0.530474 | 0.429995 | 0.258153 | -1.28971 | -1.63715 | -1.51024 | -1.25663 | -1.81222 |
| 3 | Cemip      | 0 | -1.4824  | -0.3772  | -1.59492 | -1.18142 | -1.61665 | -0.7186  | -1.71429 | -1.43661 | -3.0365  | -3.32854 |
| 3 | Dnah2      | 0 | 0.527631 | 1.29858  | 2.93283  | 2.5001   | 1.29441  | 2.51281  | 0.865723 | 1.14501  | 0.190791 | 0.449081 |
| 3 | Vmn1r58    | 0 | 0.227601 | 0.236437 | 0.426476 | 0.536965 | 0.622996 | -1.38714 | -1.77003 | -1.65137 | -0.88714 | -1.76832 |
| 3 | A230057Dl  | 0 | 0.168835 | 0.077849 | 1.24898  | 0.202486 | 0.100863 | -1.1458  | -2.00953 | -1.20052 | -1.34307 | -1.57616 |
| 3 | Il1rapl1   | 0 | -0.22041 | 1.60586  | 1.39002  | 2.47549  | 1.77389  | 1.20362  | -0.73113 | 0.792475 | 0.26789  | -0.0859  |
| 3 | Adamts17   | 0 | 0.105816 | 1.39143  | 1.09707  | 0.354692 | -0.15301 | -0.71312 | -1.61025 | -0.72787 | -1.51405 | -1.27161 |
| 3 | A930013F1  | 0 | 0.027562 | 0.694474 | 0.401172 | 0.115822 | 0.094225 | -0.88573 | -1.86782 | -1.56861 | -1.06156 | -2.25572 |
| 3 | Slc43a3    | 0 | 0.614606 | 2.79644  | 3.01598  | 1.97005  | 1.42677  | 0.885053 | 0.43172  | 0.482024 | 0.804125 | 0.593528 |
| 3 | Cplx3      | 0 | -1.13929 | -0.7862  | -1.58395 | -2.39194 | -1.76826 | -2.94608 | -2.40495 | -3.02134 | -3.16192 | -2.0555  |
| 3 | Nkain3     | 0 | 0.241225 | 0.634024 | 0.740783 | 0.308962 | 0.132524 | -1.28996 | -1.66069 | -1.73286 | -0.87239 | -1.80165 |
| 3 | Lgr6       | 0 | 1.00578  | 0.301166 | 0.384791 | 1.15537  | 1.32193  | -0.73066 | -0.66016 | -0.77475 | -0.84641 | -1.85059 |
| 3 | Gm17821    | 0 | 0.255514 | 0.525475 | 0.632462 | 0.412476 | 0.335046 | -1.15656 | -1.69748 | -1.62825 | -0.93992 | -1.91188 |
| 3 | Cypr1      | 0 | -1.29634 | 1.91245  | 0.968422 | -0.32512 | -0.21764 | -0.18901 | -0.39863 | -0.57972 | -0.76785 | -1.75778 |
| 3 | Adtrp      | 0 | 0.261023 | 0.463782 | 0.687085 | 0.118694 | -0.18892 | -1.44369 | -1.53082 | -1.83926 | -0.77919 | -2.11127 |
| 3 | Vmn1r65    | 0 | 0.312131 | 0.004824 | -0.19992 | 0.066689 | -0.69221 | -1.42364 | -1.9855  | -2.11758 | -1.28581 | -2.43373 |
| 3 | Miat       | 0 | -0.13508 | 0.212453 | -0.11807 | -0.10489 | -0.47377 | -1.05607 | -2.00985 | -1.78623 | -1.77611 | -2.67003 |
| 3 | 9530091Ct  | 0 | 0.695807 | 0.747271 | 0.658447 | 0.825123 | 0.11462  | -0.82545 | -1.57718 | -1.08825 | -0.34056 | -2.01951 |
| 3 | Cyp1b1     | 0 | 0.754848 | 2.40682  | 2.32828  | 1.06257  | 0.624605 | 0.864338 | -0.57774 | 0.076164 | -0.56655 | 0.287845 |
| 3 | Cpm        | 0 | 1.42461  | 2.41431  | 2.72715  | 2.30082  | 1.691    | 0.504866 | 0.382076 | 0.557293 | 0.055228 | 0.563911 |
| 3 | Th         | 0 | 1.92388  | 1.38218  | 1.37795  | 1.1952   | 1.1143   | -0.74869 | -0.65774 | -0.70049 | -0.33669 | -0.11206 |
| 3 | Sult1a1    | 0 | 0.906434 | 1.1128   | 1.83275  | 1.29869  | -0.8537  | 0.231515 | -0.98866 | -0.90018 | -0.40261 | -0.63006 |
| 3 | A130077B:  | 0 | 0.309099 | 0.564892 | 0.498041 | 0.337774 | 0.516193 | -1.16125 | -1.63944 | -1.79534 | -0.87038 | -1.80346 |
| 3 | Olf613     | 0 | 0.077022 | 0.735507 | 0.911378 | 0.664177 | 0.512048 | -1.02938 | -1.10306 | -1.56206 | -0.65486 | -1.95665 |
| 3 | Malat1     | 0 | 0.271054 | 0.677437 | 0.351878 | 0.456448 | 0.162873 | -0.42302 | -2.05807 | -1.3139  | -0.43369 | -2.13992 |
| 3 | Slc25a13   | 0 | 0.889673 | 2.79765  | 2.68816  | 2.01306  | 0.714588 | -0.03753 | 1.30318  | 0.243457 | 0.859249 | 0.617896 |
| 3 | Ms4a6c     | 0 | 0.544551 | 1.07356  | 0.8908   | 0.292555 | 0.260444 | -0.24734 | -1.73318 | -1.47757 | -0.72408 | -1.57919 |
| 3 | Cybrd1     | 0 | 0.396157 | 1.41401  | 1.92191  | 1.01386  | 0.409607 | 1.15921  | -0.17134 | -0.36141 | -1.08617 | -1.18068 |
| 3 | C230091Dl  | 0 | 0.299954 | 0.508233 | 0.967991 | 0.955274 | 0.635493 | -0.76327 | -1.72282 | -1.01408 | -0.81904 | -1.66463 |

|   |            |   |          |          |          |          |          |          |          |          |          |          |
|---|------------|---|----------|----------|----------|----------|----------|----------|----------|----------|----------|----------|
| 3 | Lrrc3      | 0 | -0.13065 | -0.83123 | -1.29049 | -0.64939 | -0.74591 | -2.01525 | -1.47652 | -2.12841 | -2.54288 | -3.10362 |
| 3 | Hkdc1      | 0 | -1.19413 | -0.22047 | -0.58868 | 0.28166  | 0.098143 | -2.67407 | -1.02515 | -1.47546 | -2.4107  | -1.56759 |
| 3 | Kcnq1ot1   | 0 | 0.229143 | 0.453127 | 0.773176 | 0.477491 | 0.441922 | -1.01687 | -1.65295 | -1.53022 | -0.71059 | -1.99324 |
| 3 | Gm7609     | 0 | 0.217072 | 0.550829 | 0.611384 | 0.250629 | 0.115096 | -1.5423  | -1.62419 | -1.78824 | -0.99855 | -1.81182 |
| 3 | 6030440G   | 0 | 0.577779 | 0.929334 | 1.1966   | 0.879916 | -0.24391 | -0.64931 | -1.59241 | -1.10949 | -0.79147 | -1.48218 |
| 3 | Rnf165     | 0 | -0.62637 | 0.84071  | -1.22093 | -0.93492 | -0.75661 | -1.88763 | -2.18606 | -1.97956 | -2.31987 | -1.9048  |
| 3 | Cmah       | 0 | -0.62707 | 0.350619 | 0.653132 | 0.96461  | 0.480751 | -1.63259 | -1.75803 | -1.38794 | -0.96443 | -1.34214 |
| 3 | A2m        | 0 | -0.09035 | 1.25542  | 1.54128  | 2.84236  | 1.09114  | 1.55631  | 0.226687 | -0.07983 | -0.49099 | 0.298727 |
| 3 | Gm20172    | 0 | -0.1568  | 0.179874 | 0.664319 | 0.048108 | -0.53041 | -1.28831 | -1.91236 | -1.72734 | -0.56817 | -2.46139 |
| 3 | Slc25a42   | 0 | -0.61782 | 0.588511 | -0.70136 | -1.16336 | -2.07183 | -0.93796 | -0.49143 | -1.5857  | -2.45328 | -2.56156 |
| 3 | Angptl4    | 0 | 0.880441 | 2.15361  | 1.32364  | 1.54417  | -0.22217 | -0.19048 | -0.4492  | -0.3607  | -0.56818 | -0.82989 |
| 3 | Cxcr2      | 0 | -0.16225 | 0.099738 | -0.16526 | -0.67591 | -0.67325 | -1.931   | -2.23721 | -2.2621  | -1.4182  | -2.44345 |
| 3 | Clca3a1    | 0 | 1.16039  | 0.32879  | 1.22274  | 1.23508  | 1.57024  | 0.081644 | -0.52113 | -1.6039  | -0.75271 | -0.37646 |
| 3 | Kcnk6      | 0 | -0.00788 | 0.718132 | 0.280817 | -0.25201 | -0.48428 | -1.41965 | -1.89436 | -1.718   | -2.2118  | -1.47274 |
| 3 | Lcn2       | 0 | 1.00224  | 1.36744  | 1.42006  | 0.494618 | -0.40615 | -0.28211 | -1.20426 | -1.19938 | -1.31216 | 0.096885 |
| 3 | Pot1b      | 0 | -0.22784 | 0.321974 | 0.855295 | -0.15115 | 0.449845 | -0.62774 | -2.00569 | -0.85639 | -1.86303 | -1.87559 |
| 3 | Cd163      | 0 | 0.128616 | 1.04933  | 0.247047 | 0.465488 | -0.14884 | -0.60932 | -1.03026 | -1.04423 | -2.42496 | -1.53837 |
| 3 | Nphs1      | 0 | -0.58302 | -0.71332 | 0.523828 | -1.63928 | -1.64381 | -0.96626 | -2.62914 | -2.2808  | -1.43649 | -2.33254 |
| 3 | G630064G   | 0 | 0.530812 | 0.758291 | 0.145138 | 0.805099 | 0.116211 | -1.04207 | -1.95679 | -0.8467  | -0.32091 | -2.01384 |
| 3 | A630089N   | 0 | 0.285147 | 0.475116 | 0.722519 | 0.409748 | 0.446312 | -1.13954 | -1.79867 | -1.5833  | -0.78605 | -1.78997 |
| 3 | Gbx2       | 0 | 1.32614  | 0.871465 | 2.22738  | 2.30992  | 1.2516   | 0.303223 | 0.693306 | -0.9375  | -0.21397 | 0.254045 |
| 3 | Fhad1      | 0 | 1.81613  | 1.50973  | 2.82531  | 1.91109  | 0.960984 | 0.97758  | -0.16332 | -0.1128  | 0.043614 | 0.305833 |
| 3 | Tmem181t   | 0 | -1.13136 | -0.69936 | 0.028955 | 0.221209 | -0.10743 | -2.21885 | -1.96232 | -2.05307 | -2.20048 | -1.81467 |
| 3 | Mterf1b    | 0 | 0.987456 | -0.30869 | 1.71256  | -0.17608 | 0.84885  | 0.021021 | -0.45981 | 0.500981 | 0.209338 | -2.20343 |
| 3 | Mir124a-1l | 0 | -0.33562 | -0.05828 | -0.21757 | -0.21146 | -0.17656 | -1.21839 | -2.44864 | -1.53215 | -1.85638 | -2.61456 |
| 3 | Mreg       | 0 | 1.81321  | 1.35526  | 2.42609  | 1.78773  | 1.96867  | -0.00077 | 0.728685 | -0.25877 | -0.25983 | 1.61302  |
| 3 | Meg3       | 0 | -0.31979 | 0.127221 | 0.058231 | -0.10171 | -0.48722 | -0.80993 | -2.32273 | -1.80144 | -1.2455  | -2.6658  |
| 3 | Obscn      | 0 | 0.935096 | 1.54461  | 2.33007  | 0.215611 | -0.27088 | -0.77806 | -1.05739 | 0.219932 | -0.40241 | 0.353671 |
| 3 | F830016BC  | 0 | 0.065188 | 0.193775 | 0.285086 | 0.238948 | 0.466574 | -1.47846 | -1.60184 | -1.96998 | -0.95632 | -2.07251 |
| 3 | Klhl14     | 0 | -0.73188 | -0.83637 | 0.187469 | -0.33014 | 0.711672 | -1.59166 | -1.60526 | -1.54575 | -1.85004 | -2.56234 |
| 3 | Epb4.1l4b  | 0 | -0.36605 | 0.839021 | 1.05005  | 0.469517 | -0.1553  | 0.249628 | -0.47964 | -0.18622 | -2.7046  | -0.73786 |
| 3 | Vmn2r55    | 0 | -0.03777 | 0.46064  | 0.55169  | 0.343553 | 0.589088 | -1.37239 | -1.53063 | -1.61083 | -0.84389 | -2.06022 |
| 3 | Arhgef37   | 0 | 1.60595  | 2.18153  | 2.50449  | 2.03566  | 0.399506 | 1.44844  | 0.18878  | 0.356034 | -0.50615 | 0.970511 |
| 3 | Omp        | 0 | 1.10294  | 0.654476 | 1.03861  | 0.994748 | 1.12293  | -0.76412 | -0.77461 | -0.39399 | -1.48063 | -1.22534 |
| 3 | C230037L1  | 0 | -0.17068 | -0.78305 | -0.27594 | 0.19062  | -0.79926 | -0.62814 | -2.27129 | -2.81701 | -1.34588 | -2.05243 |

|   |           |   |          |          |          |          |          |          |          |          |          |          |
|---|-----------|---|----------|----------|----------|----------|----------|----------|----------|----------|----------|----------|
| 3 | Arsj      | 0 | -2.72817 | 0.449115 | -0.06343 | -0.22557 | -0.0143  | -1.4718  | -1.49636 | -1.874   | -1.46955 | -1.27332 |
| 3 | Ace2      | 0 | -0.3938  | 0.796407 | 1.72344  | 2.23514  | -0.20154 | -0.19454 | -0.05148 | -0.14024 | 0.188066 | -1.3201  |
| 3 | Cmtm3     | 0 | 1.46356  | 2.34254  | 2.54918  | 1.36122  | 0.56833  | 1.20678  | 1.0701   | -0.46856 | -0.43976 | 0.937269 |
| 3 | Igf2bp2   | 0 | -0.64604 | -3.06881 | -1.80569 | -1.84068 | -0.64105 | -1.92545 | -1.58635 | -1.91048 | -2.00957 | -3.36439 |
| 3 | Fbn2      | 0 | -0.66028 | -2.63737 | -0.09576 | -0.39028 | -0.67139 | -1.11585 | -2.09772 | -1.07987 | -1.91846 | -2.84731 |
| 3 | Spaca6    | 0 | -0.60264 | 0.387898 | -0.03473 | 0.353222 | 0.915561 | 0.026858 | -1.68415 | -1.45201 | -0.78538 | -2.32845 |
| 3 | Tmem181c  | 0 | -1.43682 | -1.6113  | -0.2333  | -0.08572 | -0.33997 | -2.42338 | -2.106   | -2.57541 | -1.87815 | -2.20559 |
| 3 | Pisd-ps1  | 0 | -1.12619 | -0.02668 | 0.23701  | 0.578709 | -0.58996 | -1.39609 | -1.71175 | -2.48396 | -1.55404 | -1.87936 |
| 3 | Gm16287   | 0 | 0.338513 | 1.01914  | -0.39758 | 0.529338 | -0.06827 | -0.8503  | -1.80307 | -1.16908 | -0.79864 | -2.26784 |
| 3 | F13a1     | 0 | -1.15663 | 0.254359 | -0.28278 | -0.80824 | -1.42219 | -0.98538 | -1.73875 | -2.55273 | -2.85558 | -1.90536 |
| 3 | Gm29683   | 0 | 0.921207 | 0.496253 | 0.436317 | 0.81659  | 0.294787 | -1.26055 | -1.37779 | -1.36983 | -1.04325 | -1.67101 |
| 3 | Rreb1     | 0 | -0.84986 | 0.749276 | 0.627522 | -0.14613 | -1.52347 | -0.39114 | -2.24668 | -1.03481 | -1.34726 | -1.98029 |
| 3 | Dynlt1b   | 0 | -0.37636 | -1.43839 | 0.838868 | 0.564916 | 0.734192 | -1.59105 | -1.45136 | -1.66515 | -1.40087 | -1.04911 |
| 3 | Tbrg3     | 0 | -0.36195 | 0.222734 | 0.464019 | 0.41563  | 0.610166 | -0.71745 | -2.09929 | -1.244   | 0.08397  | -2.15988 |
| 3 | Atp10d    | 0 | 0.429204 | 1.93403  | 2.00101  | 0.984638 | 0.895174 | 0.533915 | -0.03088 | -0.16667 | -0.10114 | -1.49496 |
| 3 | Grid2ip   | 0 | 0.628223 | 0.496788 | 0.55711  | 1.05106  | 0.304047 | -0.75324 | -1.09584 | -1.12836 | -1.72633 | -1.68908 |
| 3 | Hrk       | 0 | -0.51974 | 0.686482 | -0.61943 | -0.43663 | -0.94089 | -1.70684 | -1.99635 | -2.03067 | -2.28732 | -2.15765 |
| 3 | Wnt9b     | 0 | 0.190292 | 0.187538 | 0.80298  | 1.22157  | 0.433272 | -2.03492 | -0.06702 | -1.33988 | -0.73188 | -1.33265 |
| 3 | Gimap1    | 0 | 1.0599   | 0.300945 | 1.42576  | 0.923816 | 0.287007 | -2.00939 | -0.67918 | -0.85789 | -0.25973 | -0.73624 |
| 3 | Cpne7     | 0 | -0.65249 | -0.36611 | -1.07048 | -0.43571 | -1.55333 | -1.81594 | -2.54903 | -3.11428 | -1.60039 | -2.33756 |
| 3 | 4930417O  | 0 | -0.0342  | 0.049593 | 1.00803  | 2.16503  | 0.437118 | -1.15479 | -0.80556 | -0.26756 | 0.206876 | -1.4171  |
| 3 | Htra4     | 0 | 1.15843  | 0.516342 | 1.82099  | 0.267083 | -0.42376 | -1.12563 | -0.7677  | -1.68716 | 0.013094 | 0.350471 |
| 3 | Gm4262    | 0 | -0.65373 | 0.171214 | 0.248715 | -0.41147 | -0.61001 | -1.18148 | -2.40934 | -2.25685 | -0.86723 | -2.36889 |
| 3 | Havcr2    | 0 | 1.17087  | 1.94253  | 2.12362  | 0.515139 | 1.49068  | 1.12349  | -0.51341 | -0.84396 | -0.21352 | 0.219368 |
| 3 | Wdfy1     | 0 | -1.32683 | -0.47738 | -0.91847 | 0.585496 | -1.23348 | -1.90773 | -2.24868 | -2.20665 | -2.10411 | -2.39088 |
| 3 | Gm17644   | 0 | 0.41817  | 0.426001 | 0.701762 | 0.408076 | 0.1943   | -0.72333 | -1.69613 | -1.67476 | -0.77913 | -2.05164 |
| 3 | 4930470H  | 0 | 0.53229  | 0.610773 | 0.87541  | 0.830618 | 0.234694 | -0.653   | -1.48056 | -1.57975 | -0.79363 | -1.72975 |
| 3 | Adm       | 0 | 1.38187  | 2.11973  | 3.34302  | 1.04775  | 0.40027  | 1.02993  | 0.104724 | 0.28521  | 0.347881 | 1.11333  |
| 3 | Fam227a   | 0 | -0.60645 | -0.97511 | -0.24371 | -1.41321 | -0.64732 | -0.90709 | -2.61427 | -2.33145 | -0.84907 | -3.04927 |
| 3 | Triobp    | 0 | -1.44597 | -1.17732 | -1.77264 | -1.76728 | -2.39496 | -1.97956 | -1.77578 | -2.43545 | -3.74463 | -3.21575 |
| 3 | Crx       | 0 | 1.03078  | 1.63572  | 0.905271 | 1.15717  | 0.934653 | 0.162056 | -1.5137  | -0.76464 | -0.45397 | -0.77979 |
| 3 | Shisa3    | 0 | 0.151829 | -0.00683 | 0.154521 | -0.19375 | 0.277948 | -1.20814 | -1.72467 | -1.72656 | -1.31146 | -2.60987 |
| 3 | A630075F1 | 0 | 0.406267 | 0.660515 | 0.063745 | 0.610402 | 0.659492 | -0.87644 | -1.86577 | -1.84921 | -0.73225 | -1.45864 |
| 3 | Lyve1     | 0 | 0.298749 | 0.814564 | 0.423846 | -0.32219 | -0.56601 | 0.039526 | -1.51567 | -1.1039  | -2.28126 | -1.7872  |
| 3 | Spc24     | 0 | -0.04291 | 0.323054 | 0.099055 | -0.37087 | -0.66333 | -1.52945 | -2.56391 | -2.03015 | -1.74765 | -1.58478 |



|   |           |   |          |          |          |          |          |          |          |          |          |          |
|---|-----------|---|----------|----------|----------|----------|----------|----------|----------|----------|----------|----------|
| 3 | Col26a1   | 0 | -2.51962 | -2.93181 | -2.70953 | -1.18987 | -2.36896 | -1.24733 | -3.1897  | -2.93649 | -2.65416 | -2.97649 |
| 3 | Tex15     | 0 | -0.22575 | 1.0745   | 1.65411  | 1.83036  | 1.33734  | 0.999359 | -0.60666 | -0.43727 | -0.55598 | -0.8292  |
| 3 | Brip1     | 0 | -1.18134 | -0.04373 | -0.56743 | -0.1027  | 0.576145 | -1.15671 | -2.25357 | -2.31921 | -1.59988 | -1.94602 |
| 3 | 6030443JC | 0 | 0.287445 | 0.967232 | 1.96524  | 1.34732  | 0.51356  | 0.681538 | -0.82871 | -1.41903 | 0.511537 | -0.76296 |
| 3 | Rnf207    | 0 | 0.299636 | 1.49439  | 0.556904 | 0.131383 | -1.52931 | -0.53567 | -0.40434 | -2.06904 | -1.09638 | -0.03544 |
| 3 | Gpr151    | 0 | 1.59819  | 1.75708  | 1.96321  | 2.38076  | 1.92527  | 0.622407 | 1.79701  | 0.686635 | -0.893   | 1.71525  |
| 3 | Mrc1      | 0 | -2.37607 | -0.53215 | -1.37376 | -0.89547 | -1.08686 | -2.2597  | -2.4688  | -2.66943 | -2.85552 | -2.70232 |
| 3 | 5031426D  | 0 | 0.407976 | -0.48195 | 0.021499 | -0.00346 | 0.028625 | -1.63626 | -2.48299 | -1.85786 | -0.02643 | -1.62112 |
| 3 | Snhg11    | 0 | -0.44486 | 0.01277  | -0.1006  | 0.148679 | 0.030991 | -0.69139 | -2.46684 | -1.81351 | -1.21595 | -2.38259 |
| 3 | 6330415B: | 0 | 0.282889 | 0.047644 | -0.11008 | 0.088194 | 0.039297 | -1.40833 | -2.42717 | -1.73397 | -0.92421 | -2.0746  |
| 3 | Socs3     | 0 | 0.426543 | 0.959743 | 0.465968 | 1.3923   | -0.16303 | -0.8265  | -1.0241  | -1.88297 | -0.91202 | -1.12345 |
| 3 | Phyhd1    | 0 | 0.171637 | 0.415392 | 0.715388 | 1.45438  | -0.677   | 0.881871 | -1.82409 | -0.72863 | -1.17834 | -0.9837  |
| 3 | A830011Kl | 0 | -1.3012  | -0.9046  | -1.97778 | -0.26059 | -2.23354 | -1.23587 | -1.47446 | -3.65024 | -1.27056 | -2.05548 |
| 3 | Fbxl12os  | 0 | -0.21043 | -0.14398 | -0.46631 | -0.82178 | 0.802449 | -1.10516 | -2.16951 | -1.7512  | -0.30234 | -2.46844 |
| 3 | BC021785  | 0 | 0.310998 | -0.70129 | -0.84177 | -0.22551 | -0.71183 | -1.58749 | -2.75416 | -2.12584 | -1.10978 | -2.37741 |
| 3 | Gm14827   | 0 | 0.064307 | -0.10213 | -0.00738 | -0.05311 | -0.28431 | -0.85588 | -2.52782 | -1.74677 | -1.26791 | -2.40744 |
| 3 | Hmmr      | 0 | -0.93575 | 0.169524 | -0.03268 | 0.494296 | 1.4129   | 0.121172 | -0.7719  | -2.06176 | -0.92425 | -1.65121 |
| 3 | 6530403Hl | 0 | -0.68461 | -0.34945 | 0.214801 | -0.38269 | -0.55876 | -1.55974 | -1.70472 | -2.75185 | -2.46567 | -1.69141 |
| 3 | Ptar1     | 0 | -1.91324 | 1.21688  | 1.61336  | 0.637573 | 1.40883  | 0.79431  | -0.29159 | 0.922584 | -0.18826 | 0.590139 |
| 3 | Trim65    | 0 | -0.635   | 0.429865 | 0.440642 | -0.26101 | -0.96832 | -0.0094  | -1.16024 | -1.17612 | -3.09918 | -0.80434 |
| 3 | Tspan18   | 0 | 0.353613 | 1.08907  | 0.413189 | 0.115431 | -0.84693 | -0.62032 | 0.002894 | -1.03229 | -2.48945 | -1.37551 |
| 3 | Alpk1     | 0 | -0.11644 | 0.927329 | 0.820665 | -0.54324 | -1.51091 | -1.50671 | -2.05777 | -0.97579 | -1.58539 | -1.11534 |
| 3 | E030024N: | 0 | -1.39362 | -1.37108 | -1.20852 | -1.20141 | -1.58632 | -3.27935 | -1.99423 | -3.18833 | -1.70629 | -3.02342 |
| 3 | Ccl9      | 0 | 1.27555  | 2.46138  | 2.35892  | 1.85174  | 2.78018  | 1.52262  | 1.24898  | 0.595687 | 0.703653 | -0.26369 |
| 3 | C730002Ll | 0 | -0.65766 | -0.10743 | 1.70278  | 2.21069  | 2.05339  | 1.03233  | -0.53851 | 0.256004 | 0.765188 | 0.923631 |
| 3 | Lancl3    | 0 | -0.42949 | 1.06295  | 1.32805  | 0.624136 | 0.313587 | 0.57191  | -0.98211 | -0.45731 | -2.05819 | -0.87842 |
| 3 | BC030499  | 0 | -0.34741 | 0.752863 | 0.958989 | 0.700278 | 0.327418 | -0.3278  | -2.2388  | -0.7913  | -0.38194 | -1.64927 |
| 3 | Csf3r     | 0 | -0.53384 | -0.02602 | 0.124753 | -1.0369  | -0.60173 | -1.07179 | -0.8512  | -2.50639 | -1.90179 | -2.81763 |
| 3 | 4831440E1 | 0 | -0.81721 | -0.64987 | -0.5283  | -0.54012 | -1.86149 | -0.51733 | -1.79802 | -1.6258  | -0.74916 | -3.56757 |
| 3 | C330013E1 | 0 | -0.00485 | -0.91092 | 1.19131  | 2.70642  | 1.3268   | -0.50302 | -0.19129 | 0.437543 | 0.54057  | 0.503122 |
| 3 | AY512931  | 0 | 0.228981 | 0.150488 | -0.40748 | -0.58462 | -0.61134 | -1.54176 | -2.39778 | -2.40709 | -0.92188 | -2.12745 |
| 3 | Fmo2      | 0 | 0.419887 | 1.05092  | 2.2863   | 0.192378 | 0.347481 | -0.83217 | -0.26079 | -0.61903 | -1.51006 | 0.276278 |
| 3 | Loxl2     | 0 | 0.11842  | 0.969118 | -0.64054 | 0.325915 | -0.26867 | -1.11843 | -0.91561 | -2.55487 | -1.20118 | -1.67399 |
| 3 | Prkcg     | 0 | -1.77114 | -1.15529 | -1.14646 | -2.22136 | -2.36003 | -2.05974 | -1.68706 | -2.55884 | -3.88071 | -2.6334  |
| 3 | Nhlh2     | 0 | 1.54746  | 1.94082  | 2.90093  | 1.93925  | 2.10897  | 1.10337  | 1.10368  | 0.204131 | -0.32827 | 0.672154 |

|   |          |   |          |          |          |          |          |          |          |          |          |          |
|---|----------|---|----------|----------|----------|----------|----------|----------|----------|----------|----------|----------|
| 3 | Isg15    | 0 | 0.198162 | 0.578485 | 0.56267  | 0.569374 | 0.914686 | -0.47078 | -1.80031 | -0.77532 | -0.72057 | -2.09937 |
| 3 | Zfand4   | 0 | 0.374881 | 1.91109  | 2.64686  | 0.857675 | 0.216761 | 0.559194 | -0.27509 | -0.66903 | 0.652863 | -0.46965 |
| 3 | Rnf122   | 0 | -2.79287 | -2.83237 | -0.75173 | -0.5752  | -1.44317 | -1.12563 | -0.26735 | -1.02305 | -1.87955 | -2.50426 |
| 3 | Tyms     | 0 | -0.21957 | 0.51912  | 0.377038 | 0.935113 | 0.291745 | -0.53316 | -1.06369 | -2.03468 | -1.18372 | -1.94006 |
| 3 | BC039771 | 0 | 1.32338  | 0.880273 | 0.550198 | 1.00214  | 0.716436 | -0.75614 | -0.01103 | -0.81374 | -0.79972 | -1.94471 |
| 3 | AY074887 | 0 | 0.635767 | 0.843846 | 0.252511 | 0.622669 | 0.154573 | -0.07986 | -1.11239 | -1.50483 | -0.19669 | -2.35442 |
| 3 | 9930111H | 0 | -0.08882 | -0.1133  | 0.496911 | -0.32797 | -0.61124 | -1.89656 | -2.18582 | -2.46377 | -1.23849 | -1.48716 |
| 3 | Sgms2    | 0 | 1.62956  | 1.92968  | 2.28949  | 3.21614  | 1.86762  | 1.67485  | 1.80742  | 1.737    | -0.13372 | 0.502618 |
| 3 | Tnfsf13  | 0 | -0.50868 | -0.85252 | -0.74799 | -0.74281 | -1.47111 | -1.45346 | -0.05512 | -3.05041 | 0.576348 | -1.81714 |
| 3 | Zim1     | 0 | 0.280982 | 1.98447  | 1.88057  | 2.18062  | 0.659554 | 0.838356 | 0.307337 | 0.104413 | -1.12028 | 0.180094 |
| 3 | Atp6ap1l | 0 | -2.1583  | -2.13951 | -0.86495 | -0.01819 | -0.5821  | -2.1627  | -1.51458 | -2.11609 | -0.33304 | -2.76316 |
| 3 | Podn     | 0 | -2.41142 | 0.085107 | -0.96981 | -1.33244 | -1.70573 | -1.13597 | -1.75247 | -1.97846 | -1.67392 | -3.39855 |
| 3 | 9530082P | 0 | -1.47156 | -1.08882 | 0.220049 | -0.34272 | -1.07997 | -1.45729 | -0.76986 | -0.74001 | -2.06497 | -3.34458 |
| 3 | Csf2rb   | 0 | 0.51131  | -0.27812 | -0.66244 | -0.33623 | -0.68196 | 0.051601 | -2.16818 | -2.00715 | -1.45148 | -2.43737 |
| 3 | A730017L | 0 | -1.31022 | -0.37198 | 0.368425 | -0.58608 | -1.1692  | -1.4393  | -1.83379 | -2.48137 | -1.58588 | -2.86589 |
| 3 | Gpr173   | 0 | -0.82071 | 0.065982 | 0.087279 | 0.251967 | 0.469361 | -0.51037 | -1.94961 | -1.19928 | -1.65275 | -2.50586 |
| 3 | Arid5a   | 0 | -1.36128 | -0.33612 | -1.89824 | -1.25028 | -1.61583 | -3.57422 | -2.52278 | -2.114   | -1.78674 | -0.87018 |
| 3 | Zic4     | 0 | 1.5675   | 1.65883  | 3.09501  | 2.96664  | 2.548    | 2.38697  | 1.31788  | 1.04048  | 0.713595 | 0.789065 |
| 3 | Tcaf2    | 0 | -0.04084 | 0.52678  | 2.10355  | 2.20243  | 0.819201 | 1.41546  | 1.09059  | 0.888053 | -0.11415 | -1.12413 |
| 3 | Zdhhc22  | 0 | 0.953495 | 1.07415  | 0.360176 | 0.311513 | -0.31291 | -0.63194 | -0.4753  | -0.24378 | -2.60103 | -0.82605 |
| 3 | Tmem181a | 0 | -1.38657 | -0.33611 | 0.10265  | 0.136476 | -0.82663 | -1.37217 | -1.25705 | -1.72321 | -2.8853  | -2.28591 |
| 3 | Igsf6    | 0 | 1.62656  | 0.472851 | 1.23771  | 1.93072  | 1.78828  | 2.05505  | -1.05543 | 0.223956 | 0.245994 | 0.115354 |
| 3 | Thpo     | 0 | -0.16838 | -0.3925  | 0.376407 | -0.79294 | -0.99693 | -1.14936 | -2.69134 | -2.04248 | -1.43317 | -2.37282 |
| 3 | Gm6537   | 0 | 1.67084  | 1.5582   | 2.26202  | -0.0803  | 1.78805  | -0.64462 | -0.0971  | -0.09465 | 0.170471 | 1.19311  |
| 3 | Lin28b   | 0 | 0.050693 | 0.522933 | 0.341453 | 0.102637 | 0.385057 | -0.39145 | -2.74111 | -0.70543 | -0.24367 | -1.72958 |
| 3 | Rac2     | 0 | -0.65063 | 0.10519  | -0.09596 | -0.05591 | -0.719   | -0.76799 | -2.56932 | -2.08694 | -1.38583 | -2.42585 |
| 3 | Was      | 0 | -0.12309 | 0.385274 | -0.08832 | -0.19928 | 0.158165 | -0.85049 | -2.2712  | -2.1302  | -0.32944 | -2.10212 |
| 3 | D130040H | 0 | -1.74267 | -0.36746 | 0.293527 | -0.04691 | 0.47927  | -1.21731 | -2.45661 | 0.907735 | -0.15948 | -0.39254 |
| 3 | Erg      | 0 | -1.46041 | -1.6361  | -0.00781 | 0.058543 | 0.362889 | -0.28191 | -1.58429 | -1.40396 | -2.64569 | -1.84866 |
| 3 | Ccdc109b | 0 | -0.19907 | -0.32664 | -1.43061 | -0.14751 | 0.577297 | -2.01281 | -0.37974 | -2.47202 | -2.0769  | -0.79209 |
| 3 | Ccdc40   | 0 | 2.08314  | 2.77983  | 3.30253  | 3.05557  | 2.17737  | 2.47536  | 2.04927  | 0.841472 | 1.01247  | 1.93264  |
| 3 | Adamts10 | 0 | -0.16625 | -0.12034 | 0.466215 | -0.10692 | -0.48605 | 0.550296 | -1.84309 | -0.75483 | -0.72605 | -2.8253  |
| 3 | AU023762 | 0 | -2.15603 | -2.26475 | -2.83184 | -0.93229 | -1.5882  | -0.92908 | -2.87051 | -2.81246 | -1.75877 | -3.15161 |
| 3 | 9630028B | 0 | -1.24584 | -0.15905 | 0.204311 | -0.61135 | -0.41325 | -1.9171  | -2.5149  | -1.83185 | -0.89456 | -2.59188 |
| 3 | Hmha1    | 0 | -1.22501 | -1.31432 | -0.59831 | -3.13605 | -1.64378 | -2.02039 | -2.39919 | -1.40732 | -2.54036 | -3.1571  |

|   |            |   |          |          |          |          |          |          |          |          |          |          |
|---|------------|---|----------|----------|----------|----------|----------|----------|----------|----------|----------|----------|
| 3 | Usp43      | 0 | -2.06389 | -1.72027 | -2.6336  | -0.39198 | -1.74891 | -2.55634 | -1.77136 | -2.4046  | -1.28167 | -3.47405 |
| 3 | Per2       | 0 | -3.20297 | -0.39802 | -0.78751 | -0.57313 | -0.14852 | -0.98678 | -0.93326 | -0.39187 | -2.56341 | -0.87672 |
| 3 | Nnt        | 0 | -2.5928  | -0.94988 | -3.15651 | -2.36308 | -2.29688 | -2.76585 | -3.36407 | -2.6267  | -2.4368  | -3.07383 |
| 3 | Dapl1      | 0 | -0.84107 | -0.3696  | 0.152799 | -0.78013 | -1.71554 | -2.32949 | -3.15159 | -1.68259 | -1.35556 | -1.58319 |
| 3 | Chrn4      | 0 | 2.2437   | 1.35926  | 2.16481  | 2.32154  | 1.5405   | 0.93833  | 0.73696  | 0.621748 | -0.89911 | 0.620243 |
| 3 | Igfbp7     | 0 | 1.33339  | 2.0686   | 3.16201  | 1.82067  | 0.489641 | 0.245056 | 1.37967  | -0.09793 | 1.85032  | 1.28275  |
| 3 | Tmco5      | 0 | -1.1681  | -1.36912 | -1.12834 | -0.65737 | -0.11416 | -0.98836 | -3.56572 | -2.17751 | -0.7997  | -1.76616 |
| 3 | Cep112     | 0 | 0.096433 | -0.63325 | 0.700275 | 0.587499 | 0.401929 | -0.49741 | -2.56826 | 0.181268 | 1.3166   | -0.05394 |
| 3 | Aim2       | 0 | 0.447045 | 0.534512 | 0.048466 | 0.577324 | 0.626662 | -0.48053 | -1.99379 | -1.80345 | -0.15924 | -1.62253 |
| 3 | Nfkbiz     | 0 | 0.75335  | 2.77006  | 1.91633  | 0.799913 | 1.10197  | -0.23859 | -0.6637  | 0.514055 | 0.439446 | 1.64352  |
| 3 | Tubd1      | 0 | 0.409977 | -1.82505 | 0.1078   | -0.7734  | -0.15334 | -0.61244 | -1.09387 | -2.87102 | -1.05624 | -1.9005  |
| 3 | Robo3      | 0 | 0.035843 | 0.64216  | 0.889899 | -0.61285 | -0.71816 | -0.94555 | -1.2515  | -1.03734 | -1.59432 | -2.53924 |
| 3 | Coro6      | 0 | -0.554   | -0.13154 | -0.88781 | 0.094594 | -1.24134 | -0.2063  | -2.2042  | -1.96587 | -2.63575 | -2.07143 |
| 3 | Inha       | 0 | -1.6077  | -0.59487 | -1.21287 | -0.50107 | -2.3585  | -2.13459 | -2.57364 | -1.97355 | -2.59644 | -3.09338 |
| 3 | Lamc3      | 0 | -1.13522 | 0.625571 | 0.430467 | -0.4035  | -1.06289 | -0.36467 | 0.919048 | 0.150961 | -2.63805 | -0.66629 |
| 3 | Cenpa      | 0 | -2.82082 | -0.33057 | -0.82161 | -1.49079 | -2.20038 | -3.06209 | -0.97682 | -2.03365 | -1.34627 | -2.36387 |
| 3 | Cd44       | 0 | -3.19612 | -0.25721 | -1.33385 | -0.19766 | -0.55266 | -1.19331 | -1.72104 | -1.42317 | -1.95749 | -2.40306 |
| 3 | Tpk1       | 0 | -1.24335 | -1.08375 | -0.14579 | 0.151221 | -0.66013 | -0.65835 | -3.10603 | -1.67818 | -0.65942 | 0.466808 |
| 3 | Igfn1      | 0 | -2.93203 | -1.55397 | -2.27834 | -2.574   | -2.75891 | -2.75869 | -3.66336 | -2.28077 | -3.23044 | -3.24131 |
| 3 | Col24a1    | 0 | -0.80748 | 0.353678 | -0.12898 | -0.81391 | 0.122258 | -0.62871 | -2.88764 | -1.6264  | -1.14352 | -2.06549 |
| 3 | Mill2      | 0 | -0.25361 | -0.12337 | -0.55561 | 0.586145 | -1.82921 | -0.79587 | -1.25327 | -0.69051 | -3.10782 | -0.65476 |
| 3 | Gpr157     | 0 | -1.01943 | -2.75069 | -0.58125 | -0.57773 | -1.58276 | -1.30728 | -1.70364 | -3.37154 | -1.68428 | -2.3072  |
| 3 | Npr1       | 0 | 2.10766  | 0.714083 | 2.15877  | 2.98626  | 1.77512  | 1.15056  | 1.60203  | 1.53861  | 0.459871 | -0.32262 |
| 3 | Pla2g4e    | 0 | -0.82393 | -0.01422 | -1.35023 | -2.08331 | -1.72125 | -2.16341 | -3.04753 | -2.50694 | -2.09904 | -2.34568 |
| 3 | H2-T9      | 0 | -0.42599 | -0.85637 | 0.91247  | -1.75701 | -0.55394 | -0.78218 | -0.19244 | -2.79109 | -0.15704 | 0.251373 |
| 3 | Rpl31-ps12 | 0 | -0.33239 | -0.32944 | 0.300772 | -0.08007 | -0.14802 | -1.17412 | -0.42473 | -0.07833 | -3.35373 | -0.46747 |
| 3 | 2310036O   | 0 | -0.5773  | -0.16865 | 0.614362 | -0.8685  | -1.55012 | -0.95755 | -0.94646 | -2.00614 | -2.99091 | -1.47317 |
| 4 | Samsn1     | 0 | -0.3081  | -1.02344 | -1.55115 | -0.10878 | 1.69248  | 0.139833 | -0.88338 | -1.64009 | -1.19961 | -1.55265 |
| 4 | Plekho2    | 0 | -1.45785 | -2.42047 | -1.93388 | -0.68208 | 0.676002 | 0.468332 | -0.07603 | -0.13263 | -0.24067 | 0.096885 |
| 4 | Bmp3       | 0 | -2.25775 | -1.61908 | 0.893067 | -0.55623 | 0.531532 | 0.470953 | 0.517152 | 0.453547 | -0.83252 | -0.53526 |
| 4 | Ly86       | 0 | -0.22627 | -0.7768  | -0.94026 | 0.067084 | 2.11353  | 1.34174  | 0.875699 | 0.734231 | 1.41169  | 1.5127   |
| 4 | Lat2       | 0 | 1.0863   | 0.61011  | 1.29406  | 1.07399  | 3.12614  | 2.42352  | 0.747661 | -0.1254  | 1.98843  | 1.87702  |
| 4 | Plau       | 0 | -1.01387 | -2.00808 | -0.16194 | -0.04884 | 0.68507  | 1.6882   | 0.830762 | 0.881284 | 0.491898 | -0.13028 |
| 4 | Top2a      | 0 | -0.15086 | -0.95337 | -0.50221 | -1.65684 | 1.72662  | 1.16763  | 0.193305 | -0.25088 | -0.88904 | -1.18499 |
| 4 | Fam198b    | 0 | -2.1284  | -1.50759 | -1.75164 | -1.50417 | 0.35408  | 0.572465 | 0.386237 | -0.28948 | 0.325338 | -0.15212 |

|   |          |   |          |          |          |          |          |          |          |          |          |          |
|---|----------|---|----------|----------|----------|----------|----------|----------|----------|----------|----------|----------|
| 4 | P2ry13   | 0 | -1.97823 | -2.7128  | -0.51459 | -2.13998 | -0.31468 | -0.02035 | 0.190985 | -0.12243 | -0.45546 | -0.61574 |
| 4 | Steap3   | 0 | -1.78931 | -0.9381  | -1.2167  | -1.85284 | 0.786655 | 0.613774 | 0.9069   | 0.241794 | -0.734   | -0.83722 |
| 4 | Prc1     | 0 | -0.23837 | 0.396298 | 0.955254 | -0.36174 | 2.6399   | 1.66438  | 0.616278 | -0.30823 | -0.32845 | -0.52211 |
| 4 | Gbp5     | 0 | -3.27648 | -0.9819  | -1.68919 | -1.0777  | 0.709321 | -0.71604 | -0.62749 | -0.89775 | -1.23419 | -0.59494 |
| 4 | Lox      | 0 | -1.45199 | 2.04989  | 0.858816 | -0.38628 | -0.18072 | 1.21855  | 0.485996 | -0.2579  | 0.804151 | -0.89198 |
| 4 | Tnfsf10  | 0 | -1.13877 | -0.76971 | -0.04515 | 0.015609 | 1.87094  | 1.1839   | 1.61097  | 1.36246  | 0.921518 | 1.17883  |
| 4 | Olfml3   | 0 | -1.27143 | -1.39266 | -2.14191 | -0.49144 | 1.54981  | 0.286314 | 0.445764 | -0.2831  | -0.2402  | -0.58026 |
| 4 | Ifit3b   | 0 | 1.52465  | 0.901073 | 1.49041  | 0.284746 | 3.50993  | 2.79173  | 1.86158  | 1.60254  | 1.7346   | 1.8232   |
| 4 | Acads    | 0 | 1.03738  | -0.20975 | 0.487739 | -0.59353 | 1.4077   | 1.57929  | 2.82375  | 0.480457 | 1.59202  | 1.5869   |
| 4 | Sparc    | 0 | 1.54013  | 1.14447  | 2.08398  | 2.16396  | 2.02668  | 3.20895  | 0.771239 | -0.04327 | 0.942053 | 0.603812 |
| 4 | Gbp3     | 0 | -1.36101 | -1.58008 | -1.81463 | -1.01989 | 1.4301   | 0.217768 | 0.459389 | -0.44893 | 0.146258 | 0.239384 |
| 4 | Lgals3bp | 0 | -0.37036 | 0.244308 | 0.252996 | 0.913025 | 1.9502   | 2.75032  | 2.03413  | 1.37369  | 0.459655 | 1.72673  |
| 4 | Ifit1    | 0 | 0.964523 | 2.01198  | 0.68514  | 0.875265 | 2.88378  | 2.70333  | 2.75631  | 2.2877   | 2.53446  | 2.28987  |
| 4 | Gfap     | 0 | 0.192599 | 0.899304 | 0.82752  | 1.47594  | 2.69157  | 2.11837  | 0.551539 | -0.08258 | -0.62487 | 0.196335 |
| 4 | Plscr2   | 0 | 0.17234  | 0.571181 | 1.2586   | 2.15288  | 2.9657   | 2.66596  | 1.62067  | 0.76595  | 1.1195   | 2.2227   |
| 4 | Mki67    | 0 | -0.27009 | 0.320551 | -0.28858 | -0.90246 | 2.16025  | 1.69407  | 0.077221 | 0.102568 | -0.29617 | -1.20877 |
| 4 | S100a4   | 0 | 0.762634 | 0.245786 | 1.63727  | 0.710083 | 1.22211  | 3.41705  | 1.11979  | 1.69048  | 0.341021 | 2.26315  |
| 4 | Bub1b    | 0 | 1.49781  | -0.32385 | 0.739371 | -0.71596 | 0.355719 | 2.66484  | 0.179596 | -0.06004 | -0.47572 | -0.42192 |
| 4 | Sfn2     | 0 | -0.54158 | 0.77031  | -0.15161 | 1.57067  | 2.06795  | 2.74705  | 0.653491 | 0.282344 | 0.25218  | 0.461567 |
| 4 | Erich5   | 0 | 0.201022 | -0.98306 | -0.54636 | -2.02626 | 0.598259 | -0.74216 | -1.86485 | -2.43932 | -0.84743 | -1.92253 |
| 4 | Lama4    | 0 | -3.49039 | -1.1176  | -1.44883 | -1.20321 | -0.33398 | 0.099082 | -0.32537 | -0.58008 | -1.08921 | -1.50041 |
| 4 | Cd248    | 0 | -2.38301 | -2.38436 | -1.20065 | -2.25851 | -2.59203 | -1.2093  | -0.68768 | -1.14939 | -3.1438  | -2.83282 |
| 4 | Tnc      | 0 | -1.52096 | -0.9041  | -1.54553 | 0.189295 | 1.11459  | -0.65346 | -0.27661 | -0.29857 | -2.20659 | -1.87927 |
| 4 | Cx3cr1   | 0 | -2.54633 | -2.54027 | -1.77971 | -1.07188 | 0.120985 | -0.73978 | -1.82442 | -2.01597 | -2.66083 | -2.15855 |
| 4 | Cmklr1   | 0 | 0.327165 | -0.79208 | -1.19207 | -0.07645 | 0.791341 | 0.03518  | -0.38951 | 0.469122 | -2.82104 | -0.84797 |
| 4 | Ctsc     | 0 | -0.56736 | 0.635054 | -0.42385 | 1.3855   | 2.34665  | 2.56912  | 1.07285  | 0.979412 | 1.02341  | 1.13242  |
| 4 | Aga      | 0 | 2.31052  | 1.83694  | 2.08285  | 1.11942  | 2.00176  | 2.90212  | 3.27754  | 3.22955  | 1.09432  | 1.3933   |
| 4 | Slc35g1  | 0 | -2.03333 | -0.84713 | -2.89227 | -2.85593 | -0.33766 | -0.66921 | -0.79043 | -1.81944 | -1.05099 | -2.20975 |
| 4 | Plekhg2  | 0 | -0.41193 | -0.76673 | 0.106077 | -0.76633 | -0.23135 | 0.201729 | -0.48766 | -0.84801 | -3.44742 | -0.28341 |
| 4 | Cys1     | 0 | 0.403764 | -0.32484 | -1.45996 | -3.18384 | -0.74431 | -0.32607 | -0.26344 | -1.15201 | -1.73185 | -0.51448 |
| 4 | Klhl3    | 0 | -1.25483 | -0.39606 | -1.67094 | -1.38361 | -2.2701  | -0.93554 | -0.69874 | -0.73788 | -3.54387 | -2.07478 |
| 4 | Cd180    | 0 | -1.64482 | -2.04634 | -0.92302 | -0.2595  | 1.04569  | 1.22339  | 0.278433 | 0.131362 | -0.1719  | -0.04498 |
| 4 | Eps8l1   | 0 | 0.543076 | -0.81584 | 0.666434 | -0.09447 | 0.686983 | 1.31377  | 2.95025  | 0.894609 | -0.33696 | 0.978414 |
| 4 | Ifitm3   | 0 | 0.013059 | 0.285536 | 0.032228 | 1.08678  | 2.27682  | 2.276    | 2.55031  | 0.698682 | 0.780577 | 1.92064  |
| 4 | Tlr2     | 0 | 0.443594 | 0.940799 | 1.59198  | 0.390664 | 1.45996  | 2.42424  | 1.59123  | 1.70966  | -1.21666 | 0.880386 |

|   |           |   |          |          |          |          |          |          |          |          |          |          |
|---|-----------|---|----------|----------|----------|----------|----------|----------|----------|----------|----------|----------|
| 4 | 93301170  | 0 | -0.68795 | 0.103087 | -0.07274 | 0.597165 | 1.97943  | 1.86208  | 1.1523   | 2.51312  | 0.894417 | 1.39128  |
| 4 | Cd109     | 0 | 0.87899  | 1.84507  | 3.22984  | 1.10452  | 1.41918  | 2.30206  | 2.06094  | 0.39339  | 0.01845  | 1.46534  |
| 4 | Bcl2a1b   | 0 | 0.370018 | 0.247212 | 0.318633 | 1.01484  | 1.64622  | 2.72987  | -0.7247  | 0.99438  | 0.936931 | -0.65054 |
| 4 | Tdg       | 0 | -0.82156 | 0.516104 | -0.3623  | -1.35781 | -0.35096 | -0.21437 | -0.30628 | -1.50447 | -3.15179 | -1.35696 |
| 4 | Igfbpl1   | 0 | 1.61963  | 0.50006  | 0.769644 | 1.55961  | 1.49953  | 2.45273  | 1.67843  | 0.884229 | 0.297006 | -1.17916 |
| 4 | Mns1      | 0 | 2.69966  | 2.28583  | 2.27793  | 2.47757  | 2.23885  | 3.59309  | 1.63321  | 2.59867  | 0.889232 | 1.10251  |
| 4 | Rsad2     | 0 | -1.02112 | 0.789768 | -0.64807 | 1.12413  | 1.82444  | 2.12885  | 1.44273  | 1.16186  | 0.99043  | 0.075614 |
| 4 | Sstr4     | 0 | -1.43397 | -0.17372 | -0.20477 | -1.94738 | -1.4212  | -0.19687 | -1.32628 | -0.73047 | -3.24115 | -1.89369 |
| 4 | Col3a1    | 0 | -1.04681 | -0.92662 | -1.27842 | -1.54548 | -1.02047 | 1.85956  | 0.274653 | 0.56443  | -0.0728  | -0.71569 |
| 4 | Oasl2     | 0 | -0.90461 | 0.120665 | -0.80404 | -0.16602 | 1.76222  | 2.25815  | 1.20631  | 0.968122 | 0.803003 | 0.492894 |
| 4 | Aldh1l2   | 0 | 0.498337 | 2.80697  | 1.69548  | 1.96699  | 2.49737  | 3.24028  | 1.56907  | 1.18176  | 0.628927 | 1.49452  |
| 4 | Cd52      | 0 | -0.68223 | -0.72391 | -0.26999 | -0.093   | 1.66515  | 2.28913  | 1.17711  | 1.23938  | 1.0912   | 0.790817 |
| 4 | Trim34a   | 0 | 0.483466 | 2.36044  | 0.697915 | 1.93213  | 2.68781  | 3.22202  | 2.21732  | 1.72916  | 1.93459  | 0.965087 |
| 4 | Serpina3n | 0 | 0.61934  | 1.13868  | 1.14613  | 2.79067  | 1.31804  | 3.30443  | 0.965652 | 0.422439 | 0.549459 | 0.796658 |
| 4 | Ddx60     | 0 | 1.20397  | 0.397029 | 1.24844  | 1.10415  | 3.12342  | 3.07533  | 1.30851  | 1.68194  | 1.37033  | 2.52388  |
| 4 | Plac9b    | 0 | 1.62032  | 0.435372 | 1.89452  | 1.13675  | 1.34388  | 3.27133  | 2.13994  | 2.92745  | 0.883524 | 2.20154  |
| 4 | Gm11992   | 0 | 1.35447  | 2.28181  | 2.22571  | 2.5498   | 1.37712  | 1.98515  | 2.64289  | 2.26751  | -0.31089 | 2.16435  |
| 4 | BC002163  | 0 | 1.93483  | 0.354201 | 1.07785  | -0.27899 | 3.03385  | 1.47611  | 0.077688 | 1.85318  | 0.909892 | 1.4313   |
| 4 | Vim       | 0 | 0.577185 | 0.900428 | 0.97605  | 1.85709  | 0.790022 | 3.47334  | 1.48885  | 0.865698 | -0.27426 | 0.774973 |
| 4 | Rad51     | 0 | 0.211599 | 0.868933 | 0.176784 | -0.15578 | 1.50488  | 2.91173  | 1.0912   | 0.515737 | 2.24242  | 0.064479 |
| 4 | E430018J2 | 0 | -0.98108 | -1.19365 | -1.84696 | -0.81601 | -0.14442 | -0.55474 | 0.28076  | -2.20707 | -0.15423 | -2.86869 |
| 4 | Met       | 0 | -3.1815  | -0.93861 | -1.24635 | -0.90023 | 0.002649 | -0.34506 | -1.4178  | -1.57112 | -1.38042 | -2.64734 |
| 4 | Mpeg1     | 0 | -0.19667 | -0.33046 | -0.59979 | -0.0295  | 1.96039  | 2.69769  | 0.48954  | 0.415683 | 0.212102 | 0.689    |
| 4 | Sim1      | 0 | 2.17267  | 2.35897  | 2.04835  | 1.97199  | 3.09479  | 3.13956  | 0.338111 | 1.71348  | 1.146    | 1.36064  |
| 4 | Cd84      | 0 | 0.219967 | 0.980005 | 0.751939 | 0.516054 | 2.26381  | 2.9017   | 0.82985  | -0.45627 | 1.11607  | -0.02313 |
| 4 | Cd68      | 0 | -1.36129 | -1.07096 | -0.65725 | 0.189036 | 1.19948  | 2.22635  | 0.406456 | -0.1316  | 0.255377 | 0.12947  |
| 4 | Stab1     | 0 | -0.84261 | 0.376516 | -0.42897 | -0.96939 | -0.8634  | 1.92747  | -1.49139 | -0.98548 | -1.04523 | -1.55422 |
| 4 | C3ar1     | 0 | 0.037169 | 0.01612  | 0.144713 | 0.887291 | 0.855166 | 3.44511  | 0.335892 | -0.03974 | 0.4089   | 0.468248 |
| 4 | Naip5     | 0 | 1.31159  | 1.94341  | 2.14711  | 2.32463  | 1.72537  | 3.34753  | 0.677216 | 0.741269 | 1.3453   | 0.184797 |
| 4 | Adgre1    | 0 | -0.46746 | -0.09546 | -1.13433 | 0.471771 | 1.15183  | 2.41797  | 0.918934 | -0.49701 | 0.068047 | 1.21976  |
| 4 | Spp1      | 0 | 0.298734 | 0.15747  | 0.304056 | -0.20864 | 0.18553  | 3.43324  | 0.052147 | 0.204442 | 0.344094 | 0.691551 |
| 4 | 2610042LC | 0 | 2.83617  | 2.1917   | 2.59134  | 2.0898   | 2.92106  | 2.8499   | 2.1154   | 1.03112  | 1.84415  | 0.428543 |
| 4 | Gpnmb     | 0 | 0.938986 | 0.473635 | 0.80077  | 0.969917 | 0.850731 | 3.78789  | 0.474977 | 0.504413 | 0.340124 | 0.880553 |
| 4 | Gdf1      | 0 | 0.408702 | 0.236079 | -0.39969 | -0.91728 | 1.50345  | -0.32122 | 2.58246  | 0.087941 | -0.60471 | 0.065641 |
| 4 | Cybb      | 0 | -0.39795 | -0.69988 | 0.600492 | 0.072516 | 1.2884   | 2.83017  | 0.775055 | -0.40618 | -0.11405 | 0.720788 |

|   |           |   |          |          |          |          |          |          |          |          |          |          |
|---|-----------|---|----------|----------|----------|----------|----------|----------|----------|----------|----------|----------|
| 4 | Plin2     | 0 | 0.613725 | 0.674947 | 1.55827  | 0.397025 | 0.352027 | 3.59148  | 1.00171  | 0.754438 | 0.008542 | 0.866926 |
| 5 | Adgrl4    | 0 | 2.05339  | 2.54703  | 2.60401  | 0.718531 | 0.768363 | 0.248128 | 0.334011 | 0.486705 | -0.12527 | 0.422474 |
| 5 | Crispld2  | 0 | 2.56283  | 1.75095  | 0.379259 | 0.11634  | -0.29457 | -0.37306 | -0.27372 | -0.46183 | -0.57238 | -0.14903 |
| 5 | Tekt4     | 0 | 1.55482  | 1.83216  | 2.06717  | 0.540391 | -0.76755 | 0.015825 | -0.21536 | -0.30093 | -0.18242 | -0.5763  |
| 5 | Fkbp5     | 0 | 1.22225  | 2.01715  | 1.72334  | 0.46008  | -0.6118  | -0.0507  | -0.51686 | -0.55899 | -0.6826  | -0.59859 |
| 5 | Synm      | 0 | 1.26538  | 2.90481  | 2.16472  | 0.43176  | 0.278916 | 0.165656 | 0.149437 | 0.412025 | -0.36893 | 0.352734 |
| 5 | Zbtb16    | 0 | 1.1582   | 2.4474   | 1.19026  | 1.1925   | -0.07404 | -0.16009 | -0.43225 | -0.22639 | -0.63769 | -0.67475 |
| 5 | Aff1      | 0 | 1.82755  | 3.16833  | 0.742443 | 1.04072  | 0.154772 | 0.193834 | -0.14321 | 0.460801 | -0.01821 | 0.263464 |
| 5 | Slc2a1    | 0 | 1.49466  | 2.22929  | 1.17018  | 0.552586 | -0.23002 | -0.73067 | -0.33919 | -0.59849 | -0.80737 | -0.14676 |
| 5 | Tsc22d3   | 0 | 2.32149  | 2.23929  | 1.33516  | 0.122268 | -0.22291 | -0.44205 | 0.016219 | -0.04666 | -0.27857 | 0.36383  |
| 5 | Il1r1     | 0 | 0.979458 | 3.00949  | 1.39282  | 0.966832 | 0.56079  | 0.089441 | -0.40452 | -0.24322 | -0.05362 | -0.13131 |
| 5 | Rcor2     | 0 | 1.4484   | -1.44755 | -1.98327 | -1.56581 | -1.09138 | -2.13967 | -1.16542 | -0.72581 | -1.30894 | -0.87873 |
| 5 | Smim3     | 0 | 1.99602  | 2.31015  | 2.19236  | 1.04543  | -0.15373 | -0.14853 | 0.440155 | 0.210884 | 0.437678 | -0.33669 |
| 5 | Arrdc2    | 0 | 2.05508  | 2.14262  | 1.26624  | 0.870797 | -0.26466 | 0.090424 | -0.60624 | -0.49529 | -0.34425 | -0.03961 |
| 5 | Alox12b   | 0 | 1.53461  | 2.44115  | 2.09542  | 0.842016 | -0.66508 | -0.13914 | -0.21784 | 0.415015 | 0.164088 | 0.381503 |
| 5 | Akap12    | 0 | 2.17497  | 2.71229  | 0.814869 | 0.833258 | 0.158991 | 0.215458 | -0.22053 | 0.133346 | -0.50969 | 0.235956 |
| 5 | Il6ra     | 0 | 0.974521 | 2.0575   | 0.401785 | 1.24701  | -0.09346 | -0.45374 | -0.70675 | -1.04179 | -0.70055 | -0.92859 |
| 5 | Angpt2    | 0 | 1.38033  | 2.36191  | 1.79291  | 0.236087 | -0.54943 | -0.43782 | -0.53492 | -0.01054 | -0.1466  | 0.047536 |
| 5 | Hmgb2     | 0 | 2.29348  | 1.57114  | 0.227285 | -0.10523 | -0.1802  | 0.248438 | -0.88454 | -0.47962 | -0.5407  | -0.96789 |
| 5 | Tinagl1   | 0 | 2.6015   | 1.608    | -0.41914 | -0.18887 | -0.53362 | -0.43532 | 0.584127 | 0.466149 | -0.58204 | 0.143752 |
| 5 | Zbtb7c    | 0 | 1.43834  | 2.88955  | 0.94751  | 0.624402 | 0.076419 | 0.135102 | 1.05253  | 0.164957 | -0.90752 | -0.04929 |
| 5 | Slc4a11   | 0 | 0.757487 | 1.10962  | 0.391495 | -1.15294 | -2.52548 | -0.02887 | -0.6639  | -0.65292 | -0.03638 | 0.244428 |
| 5 | Fas       | 0 | 1.90789  | 2.86328  | 1.69652  | 1.64953  | 1.13574  | 0.469559 | -0.14956 | -0.29914 | 0.291296 | 1.02707  |
| 5 | Pcolce2   | 0 | 2.06059  | 2.5602   | 3.11022  | 2.00158  | 0.162808 | 0.827142 | 1.07755  | 0.970682 | 1.80849  | 2.32938  |
| 5 | Tmem252   | 0 | 1.99705  | 2.83729  | 1.61328  | 0.258269 | -0.08149 | 0.269013 | 0.179799 | -0.27967 | 0.256927 | 0.796006 |
| 5 | 8430408G  | 0 | 1.47604  | 2.674    | 2.23538  | 0.761569 | -0.02482 | 0.851339 | 0.153864 | -0.28378 | -0.16345 | 1.1552   |
| 5 | Cebpd     | 0 | 1.94238  | 1.96753  | 1.20719  | 0.334315 | 0.053107 | -0.093   | -0.40115 | -1.10769 | -0.64984 | 0.485533 |
| 5 | Pdk4      | 0 | 2.02849  | 3.41023  | 1.08226  | 1.10808  | 0.462011 | 0.620824 | 0.014518 | 0.371029 | 0.418767 | 0.963388 |
| 5 | Trp53inp1 | 0 | 2.45421  | 3.17903  | 1.72184  | 1.53184  | 1.0745   | 0.682532 | 0.369736 | 0.210887 | 0.4904   | 0.656231 |
| 5 | Nostrin   | 0 | 2.55353  | 1.82069  | 0.888997 | 1.29595  | 0.93018  | -0.46261 | -0.69917 | -0.33199 | 0.754111 | 0.73819  |
| 5 | Rnf125    | 0 | 1.41062  | 2.84745  | 0.274907 | 0.756202 | 0.248981 | -0.00087 | -0.42109 | -0.84465 | 0.658303 | 1.06646  |
| 5 | Wnt4      | 0 | 0.502136 | 0.793515 | -1.08149 | -0.97273 | -0.76734 | -1.549   | -1.53002 | -2.34829 | -2.07296 | -1.00073 |
| 5 | Pglyrp1   | 0 | 1.40464  | 1.47614  | 1.67271  | -0.07548 | -1.06807 | -0.79968 | -0.78666 | -0.07851 | -0.59622 | -0.56124 |
| 5 | Gimap6    | 0 | 1.60821  | 1.5162   | 0.581125 | -0.10241 | 0.054763 | -0.96558 | -1.40248 | -1.20079 | 0.413204 | 0.60212  |
| 5 | Pnpla2    | 0 | 1.69923  | 2.46968  | 2.35755  | 0.782823 | -0.29846 | 0.137456 | 0.122938 | -0.00381 | 0.215436 | 0.201083 |

|   |         |   |          |          |          |          |          |          |          |          |          |          |
|---|---------|---|----------|----------|----------|----------|----------|----------|----------|----------|----------|----------|
| 5 | Adamts9 | 0 | 1.78682  | 2.9048   | 1.32066  | 0.093513 | 0.206536 | 0.100331 | -0.2569  | -0.31698 | 0.524757 | 0.202073 |
| 5 | Kirrel2 | 0 | 0.851667 | 1.29362  | 1.20892  | -0.43358 | -1.29895 | -0.87656 | -0.84285 | -0.99645 | -0.61035 | -1.54227 |
| 5 | Lrrc32  | 0 | 2.42889  | 0.060627 | -0.96353 | -0.92827 | -0.81425 | -0.0362  | -0.21616 | -0.38212 | -0.20583 | 1.18696  |
| 5 | Mc4r    | 0 | 0.953882 | 1.87303  | 1.22378  | 0.491787 | -0.49866 | 1.46021  | -0.59949 | -1.31338 | 0.005081 | -0.49913 |
| 5 | Cdkn1a  | 0 | 1.51705  | 2.13819  | 1.73918  | 1.28356  | -0.57702 | 0.068181 | -0.6074  | -0.28314 | -0.08146 | -0.1114  |
| 5 | Il4ra   | 0 | 1.92693  | 2.69691  | 1.36787  | 1.70367  | -0.04537 | 0.800447 | 0.006166 | 0.043569 | 0.230457 | -0.2588  |
| 5 | Sh2b2   | 0 | 0.262396 | 2.17323  | -0.79512 | 0.293717 | -0.93506 | -0.92567 | -0.9599  | -0.96935 | -1.38296 | -0.13081 |
| 5 | Mapk11  | 0 | 0.784278 | -0.2655  | -0.91637 | -1.50472 | -1.34906 | -2.06915 | -1.6758  | -2.13082 | -1.69113 | -2.41015 |
| 5 | Maff    | 0 | 1.51826  | 1.39371  | 0.866368 | 0.701636 | -0.69212 | 0.203521 | -1.0907  | -1.45079 | -0.84194 | 0.219167 |
| 5 | Emilin2 | 0 | 1.61116  | 3.10486  | 2.40887  | 1.04302  | -0.18677 | 0.485511 | 0.823343 | 1.34181  | 0.324684 | 0.934642 |
| 5 | Grasp   | 0 | 0.325886 | -0.85444 | -2.52269 | -1.78116 | -2.45112 | -2.45241 | -1.90114 | -2.1483  | -2.26986 | -1.61983 |
| 5 | Amigo2  | 0 | 2.852    | 2.45407  | 2.86391  | 2.62428  | 1.37921  | 1.26801  | 1.4867   | 0.868478 | 0.779163 | 0.533398 |
| 5 | Elmsan1 | 0 | 1.90106  | 2.74244  | 0.24372  | 0.632279 | -0.36335 | -0.15674 | -0.33274 | -0.10549 | -0.17221 | 0.276309 |
| 5 | Tma16   | 0 | 0.976272 | 2.34674  | 1.03121  | 0.241724 | -0.7342  | -0.46322 | -0.83367 | -0.81654 | -0.33156 | -0.51607 |
| 5 | Errfi1  | 0 | 2.66386  | 2.7127   | 0.640421 | 1.05947  | 0.15725  | 0.421304 | 0.106311 | 0.180895 | -0.04413 | 0.73999  |
| 5 | Mafk    | 0 | 1.30092  | 1.97223  | 0.497261 | 0.954565 | -0.2775  | -0.60437 | -1.03233 | -0.75168 | -1.11528 | -0.09227 |
| 5 | Def6    | 0 | 1.18011  | 0.493556 | 0.147803 | -0.62777 | -1.57208 | 0.49879  | 0.475265 | 0.794875 | -1.80981 | -1.14793 |
| 5 | Myom1   | 0 | -0.23551 | 0.363595 | -1.57089 | -2.40438 | -1.48824 | -1.8177  | -2.65594 | -1.70213 | -1.70712 | -2.16841 |
| 5 | Emp1    | 0 | 2.40086  | 2.81511  | 0.615389 | 1.31999  | 1.25438  | 1.37992  | -0.08716 | 0.946851 | 0.085789 | -0.13028 |
| 5 | Tlr7    | 0 | 1.42822  | 2.36413  | 0.996905 | 1.67107  | 0.713476 | 0.724108 | -0.83148 | -0.52563 | -0.31376 | -0.00913 |
| 5 | Ret     | 0 | 3.32477  | 2.55227  | 1.72259  | 2.12899  | 1.30549  | 0.721564 | 0.362306 | 1.17831  | 0.531699 | 1.214    |
| 5 | Txnip   | 0 | 2.25075  | 2.71915  | 0.780549 | 0.006762 | 0.176116 | 0.206224 | 0.496026 | 0.691743 | -0.59961 | 1.24685  |
| 5 | Gpr179  | 0 | 3.42614  | 2.0463   | 2.21977  | 3.73978  | 2.16405  | 2.87726  | 1.7338   | 1.74113  | 2.33515  | 1.59598  |
| 5 | Rhoj    | 0 | 2.09132  | 2.87875  | 2.43075  | 1.85379  | 0.036821 | 1.13864  | 0.340299 | 0.756742 | 0.874033 | 0.412488 |
| 5 | Cbfa2t3 | 0 | 1.33506  | -0.18084 | -2.48492 | -0.9567  | -1.2623  | -1.85873 | -1.13105 | -0.68881 | -0.96875 | -1.10394 |
| 5 | Ddit4   | 0 | 2.25668  | 2.07112  | 1.19221  | 0.837999 | 0.478772 | 0.215933 | -0.52987 | -0.57933 | -0.58351 | 0.15134  |
| 5 | Ncf1    | 0 | 0.57137  | 2.24651  | 0.412837 | 0.493275 | 0.275676 | 1.00532  | -0.52072 | -1.32126 | -1.15634 | -0.23806 |
| 5 | Arl4d   | 0 | 2.01486  | 1.04623  | -0.72524 | -0.84669 | -1.1189  | -0.17318 | -0.05418 | -0.54135 | 0.448263 | 1.42157  |
| 5 | Mov10   | 0 | 0.207108 | -1.3703  | -2.22852 | -1.74317 | -2.41182 | -1.96928 | -3.04183 | -1.28996 | -1.7696  | -2.45262 |
| 5 | Gadd45g | 0 | 2.05685  | 0.222274 | -0.41201 | -1.53519 | -1.5494  | -1.03145 | -0.04029 | -0.56144 | -0.79027 | -0.01131 |
| 5 | Gem     | 0 | 2.36592  | 1.08834  | -0.23898 | 1.49958  | 0.544935 | 0.889807 | 0.939927 | -1.00825 | 0.653269 | 2.16852  |
| 5 | Ccdc88b | 0 | 1.57997  | 2.00392  | 0.650464 | -1.04304 | -0.34368 | 1.07161  | 0.240899 | 0.452442 | -1.16402 | 0.901896 |
| 5 | Asap3   | 0 | 0.742021 | 1.83742  | -0.39999 | 2.22624  | 1.52292  | 1.12031  | 0.174986 | -0.3199  | -0.58876 | -0.35871 |
| 5 | Ccdc121 | 0 | 0.856796 | 2.36977  | 1.2561   | 1.68738  | -0.16684 | 1.32951  | 1.10738  | 1.79464  | 0.163251 | 3.07561  |
| 5 | Tcf15   | 0 | 2.37505  | -0.0309  | -0.85221 | -0.50528 | -1.44824 | -0.54858 | -0.80236 | -0.88693 | 0.319803 | -0.12383 |

|   |           |   |          |          |          |          |          |          |          |          |          |          |
|---|-----------|---|----------|----------|----------|----------|----------|----------|----------|----------|----------|----------|
| 5 | Cldn1     | 0 | 1.52442  | 2.93538  | 1.07774  | 2.34872  | 1.03395  | 0.483251 | 1.61985  | -0.44971 | 0.31941  | 1.22479  |
| 5 | Tnfrsf12a | 0 | 1.07429  | 0.012099 | -0.2092  | -0.14811 | -2.18601 | -2.10975 | -1.35055 | -1.04376 | -1.23403 | -1.28521 |
| 5 | Hmox1     | 0 | 2.41033  | 2.45359  | 1.62209  | 0.22799  | 0.291747 | 0.518112 | 0.858461 | 0.210685 | -0.61114 | 0.177976 |
| 5 | Gal       | 0 | 2.63156  | 1.55538  | 2.38723  | 2.99883  | 2.86351  | 1.5161   | 1.07856  | 0.582695 | 1.58416  | 0.655172 |
| 5 | Gm11627   | 0 | 1.9143   | 1.90139  | 2.27926  | 0.09195  | -0.50257 | 0.163613 | 0.011461 | -0.44107 | 1.17213  | 0.543252 |
| 5 | Hs3st3b1  | 0 | 1.41375  | 3.0424   | 1.53702  | 3.17489  | 2.83829  | 0.741438 | 1.23415  | 1.28976  | 1.34002  | 1.0774   |
| 5 | Cebpb     | 0 | 2.96969  | 1.16131  | 1.11028  | -0.08052 | 0.798366 | 0.786518 | 1.5415   | 0.731145 | 1.53037  | 2.93445  |
| 5 | Rin3      | 0 | 1.60211  | 2.04255  | -0.12644 | -0.69159 | 0.273837 | -0.68013 | -0.10926 | -0.68298 | -1.12742 | -0.69524 |
| 5 | Ung       | 0 | 2.86091  | 1.5392   | -0.61456 | 0.944734 | 0.673518 | -0.09054 | 0.03737  | 0.001213 | 1.17975  | -0.15038 |
| 5 | B4galt1   | 0 | 0.892678 | 2.85422  | -0.16532 | 0.562062 | 0.226279 | 0.612001 | -0.26777 | -0.74598 | -0.80035 | 0.160089 |
| 5 | Nes       | 0 | 1.63396  | -1.10952 | -2.55825 | -1.02381 | -0.7763  | -0.479   | -0.99577 | -0.24671 | -0.84413 | -0.7113  |
| 5 | Stbd1     | 0 | 1.01791  | 0.439919 | -1.47376 | -0.74082 | -1.22336 | -1.21702 | -1.60289 | -2.48363 | -1.0557  | -1.27157 |
| 5 | Gm14685   | 0 | 0.860257 | 2.73548  | 1.31999  | 1.57915  | 0.201404 | 0.510678 | 1.17726  | -1.22849 | 0.606719 | 0.82298  |
| 5 | Icosl     | 0 | 0.942126 | 2.26998  | 0.576292 | -0.96223 | -1.16033 | 0.137167 | 0.009202 | 1.18621  | 0.447862 | 1.3486   |
| 5 | Utp14b    | 0 | 2.20658  | 3.0887   | 1.16117  | 0.821145 | 1.11038  | 0.355496 | -0.42287 | 0.941302 | 0.28119  | 1.38944  |
| 5 | 6530402F1 | 0 | -0.36167 | 0.757004 | -1.82308 | -1.54553 | -1.35589 | -1.49007 | -1.72685 | -1.6985  | -2.69549 | -2.03898 |
| 5 | 1600029O  | 0 | 0.767639 | 0.630246 | -0.33474 | 0.327617 | -0.04649 | 0.035041 | -1.44195 | -2.58344 | 0.205564 | -1.05016 |
| 5 | Cfap53    | 0 | 2.14474  | 1.54321  | 1.17147  | 3.10797  | 0.301813 | 1.42841  | 0.408409 | -0.00156 | 2.14689  | 0.912313 |
| 5 | Tlr4      | 0 | 0.359264 | 2.07489  | -1.34366 | -1.19941 | 1.01812  | 0.391908 | 0.190693 | 0.490288 | 0.016114 | 1.37422  |
| 5 | Grin2d    | 0 | 1.06774  | 0.610355 | 0.238079 | -0.11676 | -1.75423 | -0.03567 | 0.751644 | 0.144938 | -2.21438 | 0.018172 |
| 5 | Acacb     | 0 | 1.05044  | 2.69301  | 1.8209   | 1.40258  | -0.45877 | -0.29917 | 1.05639  | 1.01499  | -0.24738 | 1.38435  |
| 5 | Ppl       | 0 | 1.33082  | 1.74941  | 0.750339 | -1.12521 | -1.51574 | 0.653027 | 0.215675 | 0.430796 | -0.17884 | 1.21776  |
| 5 | Ly6a      | 0 | 1.75709  | 2.37833  | 3.07801  | 0.326215 | 0.333286 | 0.454734 | 0.916554 | 0.539856 | 0.108502 | 1.01868  |
| 5 | Smco3     | 0 | 2.13489  | 3.14205  | 2.55811  | 1.89988  | 1.64006  | 1.10929  | 1.32298  | 1.96738  | 2.59489  | 3.61858  |
| 5 | Dsp       | 0 | 1.23919  | 2.50945  | 1.79407  | 0.988162 | -0.05061 | -0.37823 | 1.31372  | 0.371182 | -0.83503 | 0.366371 |
| 5 | Ctla2b    | 0 | 1.61083  | 1.36319  | 1.56137  | 0.097597 | -0.57666 | 1.0935   | -0.9509  | -0.46487 | -0.94236 | 0.892752 |
| 5 | Alkbh4    | 0 | 2.2866   | 2.39985  | 1.47688  | 0.320365 | 1.16748  | 0.778148 | 1.26191  | 1.33696  | 2.61556  | 3.22701  |
| 5 | Gch1      | 0 | 3.4193   | 3.07623  | 2.03033  | 1.47211  | 1.01005  | 1.81104  | 2.31615  | 1.0356   | 0.862174 | 2.01383  |
| 5 | Tiparp    | 0 | 2.33255  | 2.73468  | 0.98019  | 2.30733  | 2.9373   | 1.69244  | 1.38523  | 1.74685  | 3.13359  | 3.23969  |
| 5 | Plekhf1   | 0 | 2.52138  | 2.51253  | 1.15502  | 0.285407 | -0.27329 | 0.363946 | -0.14533 | 0.196668 | 0.908545 | 1.48236  |
| 5 | Itga2b    | 0 | 2.97956  | 2.55983  | 2.55414  | 2.97857  | 1.5957   | 3.13522  | 1.20827  | 2.23094  | 2.31879  | 0.883583 |
| 5 | Fam179a   | 0 | 2.69977  | 3.1772   | 1.42504  | 1.37785  | 2.59287  | 1.68468  | 2.22063  | 2.54194  | 0.286523 | 2.08784  |
| 5 | Atxn7l2   | 0 | 0.875011 | -0.81557 | -1.21415 | -1.78872 | -1.54062 | -0.32109 | -1.54805 | -1.32244 | -2.90614 | -1.22517 |
| 5 | Pmaip1    | 0 | 3.31143  | 3.60431  | 1.97806  | 1.8701   | 1.86629  | 1.66782  | 1.02932  | 1.26747  | 2.35436  | 1.62386  |
| 5 | Col5a3    | 0 | 0.787894 | 1.48435  | 1.64682  | 0.535292 | -0.26229 | 1.84092  | -1.54877 | -0.11137 | 0.237913 | -0.1836  |



|   |          |     |          |          |          |          |          |          |          |          |          |          |
|---|----------|-----|----------|----------|----------|----------|----------|----------|----------|----------|----------|----------|
| 5 | Icam1    | 0   | 1.48379  | 0.71704  | 0.064353 | 0.999635 | -0.35995 | -0.19144 | 0.199162 | -0.75708 | -0.30366 | 2.70068  |
| 5 | Rtkn2    | 0   | 1.38974  | 2.95752  | 1.10856  | 1.57644  | 0.728364 | -0.74807 | -0.07017 | 0.647748 | 0.157573 | 0.495531 |
| 5 | Dnaic2   | 0   | 3.07154  | 2.98509  | 2.44966  | 1.05178  | 0.268482 | 2.18849  | 1.64301  | 1.42953  | 1.4071   | 2.08282  |
| 5 | Kif23    | 0   | 0.477566 | 0.51481  | -1.78707 | -0.58003 | 0.070791 | -0.19184 | -2.50221 | 0.216678 | -0.17278 | -1.52533 |
| 5 | Tirap    | 0   | 2.14917  | 3.49234  | 1.88261  | 1.00675  | 1.24426  | 0.980005 | 1.21885  | -0.03507 | 0.804569 | 1.77049  |
| 5 | Zfp931   | 0   | 3.38149  | 2.3468   | 1.63761  | 1.83288  | 3.41814  | 2.15573  | 1.37523  | 1.63072  | 3.13317  | 1.85917  |
| 5 | Irx2     | 0   | 3.32485  | 2.26409  | 2.81922  | 1.74812  | 2.57953  | 1.79968  | 3.17819  | 1.36708  | 0.909364 | 2.3071   |
| 5 | Tppp3    | 0   | 2.6595   | 2.49462  | 2.90724  | 2.41706  | 0.118279 | 1.14555  | 1.32945  | 1.10755  | 1.76038  | 2.25527  |
| 5 | Gpx3     | 0   | 3.74536  | 2.5211   | 3.32363  | 3.43849  | 2.98535  | 2.76948  | 2.30007  | 2.07194  | 2.22599  | 2.76692  |
| 5 | Apold1   | 0   | -0.20783 | -0.0783  | -1.52307 | -0.97142 | -1.45668 | -2.32139 | -2.42323 | -2.75768 | -1.41981 | -0.26672 |
| 5 | Ms4a6d   | 0   | 2.23523  | 2.84849  | 1.57902  | 2.40778  | 1.67506  | 2.46265  | 0.011671 | 1.10668  | 0.649521 | 0.748393 |
| 5 | Hspa1a   | 0   | 0.723387 | 2.26771  | 1.2438   | -0.16072 | -0.36339 | 0.188903 | 0.476099 | 0.266006 | 1.83024  | 2.50425  |
| 5 | Fabp7    | 0   | 2.32209  | 0.106754 | 0.454816 | 1.96815  | 2.48879  | 0.138366 | 0.390948 | -0.35347 | 1.40944  | 0.813852 |
| 5 | Ccdc81   | 0   | 2.88536  | 1.33675  | 1.06565  | 2.61478  | 1.46789  | 1.45502  | 1.55418  | 0.750723 | 2.44058  | -0.24528 |
| 5 | St8sia6  | 0   | 0.463408 | 3.82742  | 1.76743  | 2.04051  | 2.33656  | 1.12233  | 1.63355  | 1.17702  | 1.48348  | 1.53193  |
| 5 | Hcrt     | 0   | 2.71822  | 2.72206  | 1.46102  | 1.98198  | 1.23742  | 0.798467 | 3.40338  | 0.797054 | 1.7398   | 2.0906   |
| 5 | Cracr2b  | 0   | 1.43211  | 3.0482   | 1.08219  | 0.435995 | 0.368007 | 1.61678  | 0.603715 | 0.355967 | -0.67179 | 1.52726  |
| 5 | Serpine1 | 0   | 1.85714  | 2.49927  | 1.76127  | 2.40077  | 0.511104 | 3.01081  | 1.67843  | 2.4464   | 0.191591 | 1.81258  |
| 5 | Ccl28    | 0   | 3.29275  | 3.36538  | 2.71039  | 1.83008  | 1.7941   | 3.57577  | 2.4111   | 2.18109  | 2.00161  | 2.78969  |
| 5 | Slc18a2  | 0   | 2.92207  | 1.90402  | 2.40513  | 0.916139 | 1.75774  | 2.61242  | 1.04888  | 1.0585   | 2.502    | 3.25067  |
| 5 | Flnc     | 0   | 2.42748  | 3.74267  | 2.2441   | 2.14755  | 1.87724  | 3.52418  | 1.77938  | 2.21436  | 2.27109  | 3.09346  |
|   |          | pre | 1h       | 3h       | 6h       | 1d       | 3d       | 1w       | 2w       | 1m       | 2m       | 6m       |
|   | cluster1 | 0   | 0.763413 | 0.874826 | 1.509735 | 1.72894  | 1.342794 | 1.952587 | 1.994447 | 1.853675 | 2.094874 | 2.123894 |
|   | cluster2 | 0   | -0.88219 | -0.9595  | -1.55744 | -1.34626 | -1.0194  | -0.24323 | 0.179366 | 0.12112  | 0.024861 | 0.433232 |
|   | cluster3 | 0   | -0.0521  | 0.417961 | 0.589853 | 0.356259 | -0.03169 | -0.68733 | -1.21393 | -1.20746 | -1.09781 | -1.37531 |
|   | cluster4 | 0   | -0.19216 | 0.02449  | 0.087158 | 0.100204 | 1.213134 | 1.686457 | 0.701016 | 0.33005  | -0.03389 | 0.144795 |
|   | cluster5 | 0   | 1.752426 | 1.964733 | 0.90935  | 0.689299 | 0.160729 | 0.35047  | 0.098584 | 0.040474 | 0.124862 | 0.54592  |



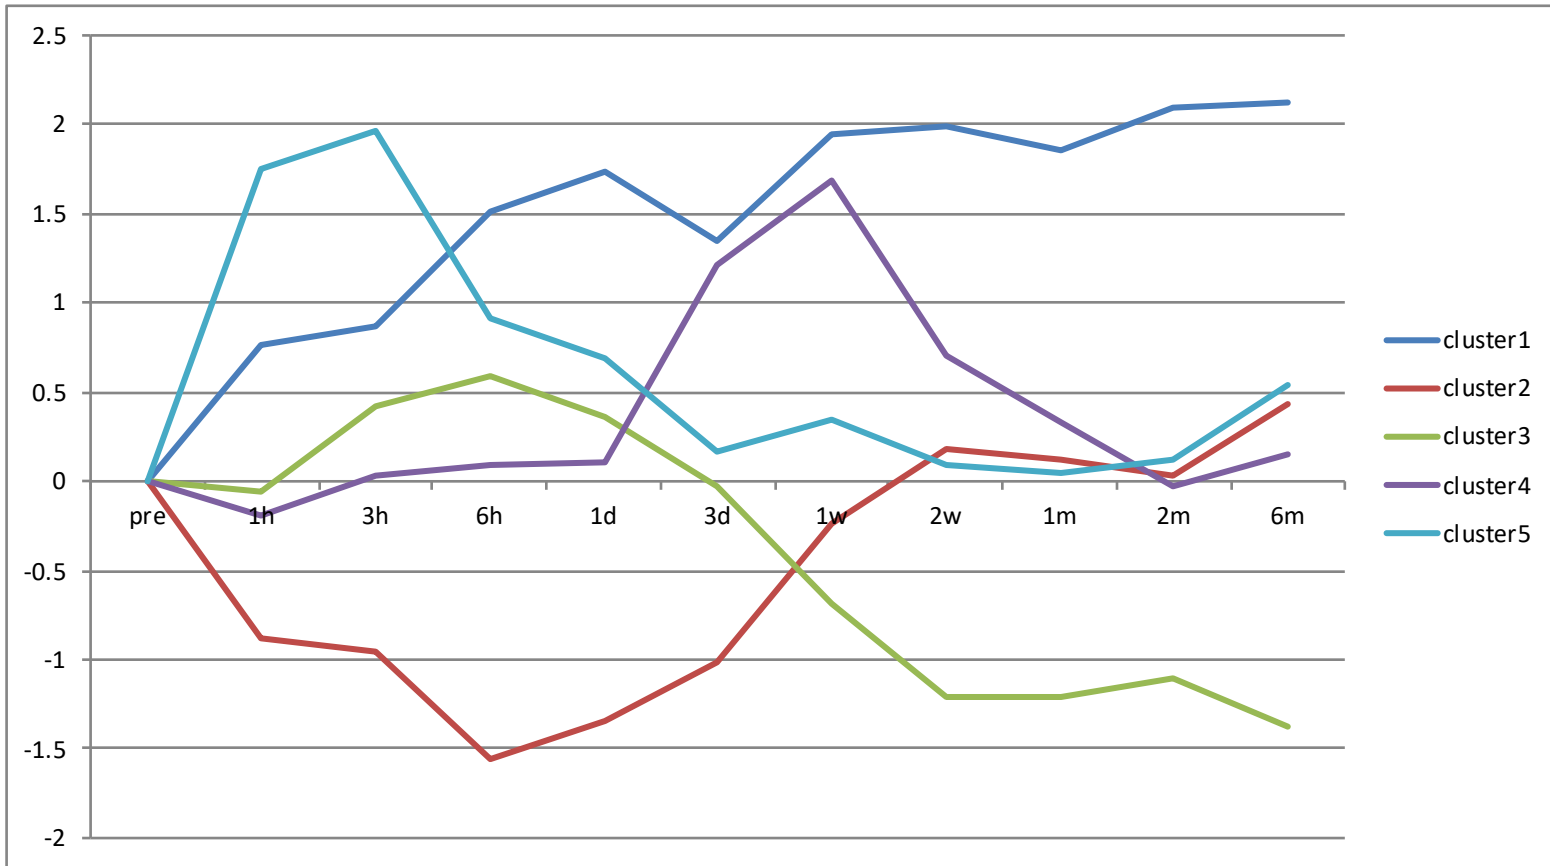

## Ipsilateral

| cluster | Gene          | pre | 1h         | 3h         | 6h         | 1d         | 3d        | 1w        | 2w       | 1m        | 2m         | 6m         |
|---------|---------------|-----|------------|------------|------------|------------|-----------|-----------|----------|-----------|------------|------------|
| 1       | 0610040J01Rik | 0   | -0.190018  | 0.541435   | 0.709241   | 0.591293   | 2.57285   | 2.16279   | 2.41253  | 1.33794   | 0.946539   | -0.0880033 |
| 1       | 1110008P14Rik | 0   | -0.612116  | -0.987415  | -1.26459   | -1.39878   | 0.599156  | -2.52925  | -2.69412 | -1.57001  | -2.05252   | -1.48904   |
| 1       | 1600029O15Rik | 0   | 0.222293   | 0.00092    | -0.19145   | 0.704023   | 2.03555   | -0.473837 | -1.15748 | -1.51699  | -0.950388  | -0.999022  |
| 1       | 1700012B09Rik | 0   | 0.691843   | 0.208789   | 1.17107    | 1.69272    | 3.34086   | 1.97946   | 1.694    | 2.0003    | 2.53386    | 2.12334    |
| 1       | 1700017B05Rik | 0   | -0.148148  | -0.27989   | -0.0729305 | 0.450106   | 1.96946   | 1.98942   | 1.28805  | -0.212399 | -0.242715  | -1.13021   |
| 1       | 1700112E06Rik | 0   | -0.0901118 | 0.170617   | 0.304478   | 0.288425   | 2.9078    | 2.04384   | 2.02341  | 1.54943   | 1.21978    | 1.2051     |
| 1       | 1810011H11Rik | 0   | 0.107459   | -0.137194  | -0.123356  | -0.172286  | 1.87104   | 2.26717   | 1.77564  | 0.764659  | 1.01449    | -0.726042  |
| 1       | 1810058I24Rik | 0   | 0.0481386  | -0.122733  | 0.323743   | 0.308282   | 2.90666   | 2.17483   | 1.06699  | -0.129187 | 0.603284   | 0.203793   |
| 1       | 2410004P03Rik | 0   | 0.0628966  | -1.41696   | -0.20239   | 0.0018373  | 1.33344   | 1.5031    | 1.05569  | 1.3051    | 2.04961    | 0.949596   |
| 1       | 2610305D13Rik | 0   | 1.49634    | 0.398152   | 0.772161   | 1.56334    | 3.15979   | 2.62831   | 1.06702  | 1.48698   | 2.70459    | 0.913297   |
| 1       | 2810417H13Rik | 0   | 0.0069149  | -0.0794139 | -0.112324  | 0.621192   | 2.76976   | 1.82842   | 1.01354  | 0.222926  | 0.129113   | -0.679559  |
| 1       | 2810474O19Rik | 0   | 0.556626   | 0.600815   | 1.02641    | 1.02861    | 3.43933   | 1.93599   | 1.8748   | 0.766598  | 1.11856    | -0.0640256 |
| 1       | 3110039M20Rik | 0   | -1.31587   | -2.60066   | -1.77975   | -0.414056  | -0.897943 | -1.66141  | -1.98655 | -2.63353  | -3.23089   | -0.858699  |
| 1       | 4831440E17Rik | 0   | -0.994933  | -1.91819   | -1.99178   | -1.99014   | 0.0372983 | -1.44926  | -2.35366 | -2.1433   | -1.86579   | -3.34508   |
| 1       | 4930523C07Rik | 0   | 2.87938    | 0.999875   | 1.45563    | 1.67376    | 3.12894   | 3.02218   | 2.5487   | 2.4025    | 2.69872    | 1.25607    |
| 1       | 4930556M19Rik | 0   | -0.302139  | -0.120899  | -0.733456  | -0.139691  | 1.82998   | 2.24178   | 1.73776  | 0.342448  | -0.0783533 | 0.143803   |
| 1       | 5031426D15Rik | 0   | 0.229949   | -0.921438  | -1.09277   | -0.999567  | 0.789671  | -1.8761   | -2.34437 | -2.08855  | -1.54678   | -1.46903   |
| 1       | 5730559C18Rik | 0   | -0.82022   | -0.969677  | -1.46042   | 0.345321   | 1.52466   | 1.31203   | 0.683737 | -0.555374 | -0.971453  | -0.79647   |
| 1       | 6330415B21Rik | 0   | 0.470623   | -0.845324  | -0.884346  | -0.25407   | 1.2136    | -1.20818  | -2.02167 | -1.6566   | -1.00225   | -1.80459   |
| 1       | 6430571L13Rik | 0   | 0.658272   | 0.0986491  | 0.355177   | -0.761595  | 1.01838   | -0.877233 | -1.74833 | -2.27886  | -0.82435   | -0.305046  |
| 1       | 9530091C08Rik | 0   | 1.05794    | -0.152457  | -0.17736   | -0.287721  | 1.55834   | -0.997906 | -1.54734 | -1.50205  | -1.20336   | -0.878232  |
| 1       | 9930111H07Rik | 0   | 0.792075   | 0.0281491  | -0.109031  | -0.0240523 | 1.31266   | -1.27532  | -1.54375 | -1.81603  | -1.13803   | -1.08665   |
| 1       | A4galt        | 0   | -0.346921  | 0.43681    | 1.21018    | 1.54473    | 3.02595   | 2.09192   | 2.0595   | 1.60076   | 1.46646    | 0.579019   |
| 1       | A630001G21Rik | 0   | -0.255938  | 0.0319914  | -0.35605   | 1.07198    | 2.19074   | 2.17593   | 2.17572  | 1.03722   | 1.28173    | 0.25595    |
| 1       | A930013F10Rik | 0   | 0.0895511  | -0.0802722 | -0.0507993 | -0.551428  | 0.693656  | -1.21464  | -1.36083 | -1.53349  | -1.70992   | -2.63369   |
| 1       | AA467197      | 0   | 0.854141   | 0.808417   | 1.24989    | 2.76783    | 3.29125   | 2.68623   | 2.44048  | 1.6919    | 1.71666    | 1.24872    |
| 1       | Abcc3         | 0   | -0.442456  | -0.26586   | -0.39906   | 0.404924   | 1.84986   | 2.29698   | 2.02656  | 0.80738   | 0.778573   | 0.105745   |
| 1       | Abhd17a       | 0   | -1.02956   | -2.5786    | -3.34118   | -1.84921   | -0.677974 | -2.50007  | -2.74629 | -2.19702  | -2.5775    | -1.93734   |
| 1       | Abi3          | 0   | -0.607756  | -0.614222  | -0.24094   | 0.790113   | 2.2468    | 1.77823   | 1.82645  | 0.687484  | 0.60633    | 0.0059103  |
| 1       | Acadl         | 0   | 0.215293   | 0.894013   | 1.00196    | 0.916896   | 3.76079   | 1.97649   | 1.59168  | 1.45797   | 1.45533    | 1.64689    |
| 1       | Acads         | 0   | -0.0826616 | -0.370318  | -0.124677  | 0.685558   | 2.55519   | 2.14805   | 2.00755  | 0.78682   | 0.888127   | 0.78787    |
| 1       | Acp5          | 0   | 0.142923   | -0.234963  | -0.0243677 | -1.02874   | 1.73854   | 1.28667   | 1.59455  | 0.303442  | 1.49676    | -0.990525  |
| 1       | Acvr1l        | 0   | 0.0407916  | -0.651579  | 0.379061   | 2.44643    | 2.06263   | 1.68746   | 1.77748  | 0.569116  | 0.680071   | 0.171047   |
| 1       | Adam8         | 0   | 0.0958023  | 0.283225   | 0.396501   | 1.74164    | 2.09877   | 2.31987   | 1.74462  | 0.202462  | 1.12466    | -0.690084  |

|   |           |   |            |            |            |           |           |          |           |            |           |            |
|---|-----------|---|------------|------------|------------|-----------|-----------|----------|-----------|------------|-----------|------------|
| 1 | Adamts10  | 0 | -0.544237  | -1.52772   | -1.16927   | -1.00466  | 1.18805   | 0.551792 | -0.118265 | -1.10982   | -0.716949 | -2.40695   |
| 1 | Adamts14  | 0 | 0.224759   | 0.440225   | 0.991845   | 1.70726   | 3.06557   | 2.48461  | 2.52066   | 1.67809    | 1.76517   | 1.10005    |
| 1 | Adap2     | 0 | -0.197402  | -0.191794  | 0.038807   | 0.581292  | 2.36001   | 2.26223  | 2.06834   | 0.890625   | 0.372974  | 0.16629    |
| 1 | Adgre1    | 0 | -0.0645644 | 0.212384   | 0.071633   | 0.534239  | 2.26434   | 2.59148  | 2.25764   | 1.3408     | 1.36209   | 0.543434   |
| 1 | Adgre5    | 0 | -0.323193  | -0.403044  | 0.245109   | 1.11027   | 2.2088    | 1.98993  | 2.34772   | 1.30373    | 1.57581   | 0.866393   |
| 1 | Adora3    | 0 | -0.565349  | -0.303824  | -0.527469  | 0.740839  | 1.91095   | 1.97328  | 2.17075   | 1.05011    | 0.565612  | 0.660831   |
| 1 | Adssl1    | 0 | 0.470555   | 0.367634   | 0.93293    | 1.48757   | 3.21084   | 2.41179  | 2.61981   | 1.62132    | 1.38597   | 1.17257    |
| 1 | AF251705  | 0 | 0.0194016  | 0.0862761  | -0.0572075 | 0.139733  | 2.10152   | 2.18603  | 2.28184   | 1.41579    | 1.28128   | -0.0273862 |
| 1 | Aga       | 0 | -0.314535  | -0.666392  | 0.105233   | 0.563528  | 2.05175   | 1.93007  | 2.40725   | 0.756645   | 0.887224  | 0.775224   |
| 1 | Agtrap    | 0 | 0.382301   | 0.392034   | 0.428204   | 0.738647  | 3.15025   | 2.12539  | 2.26485   | 1.10008    | 1.57065   | 0.48011    |
| 1 | AI662270  | 0 | 0.381672   | 0.351452   | 0.374197   | 1.37706   | 3.01125   | 2.06134  | 2.37027   | 1.66978    | 2.12944   | 0.819226   |
| 1 | Aif1      | 0 | 0.152348   | 0.0928567  | 0.0126121  | 0.546118  | 2.67841   | 2.2293   | 2.26006   | 1.24831    | 1.09403   | 0.455968   |
| 1 | Aim2      | 0 | 0.396079   | 0.438539   | 0.476152   | 0.540597  | 2.77164   | 2.13189  | 1.95589   | 0.627181   | 0.583439  | -0.559626  |
| 1 | Akip1     | 0 | -0.426573  | -0.88003   | -0.0410432 | 0.56524   | 2.52174   | 1.66874  | 1.39541   | 1.04106    | 1.2648    | 0.759403   |
| 1 | Akna      | 0 | -0.573746  | -0.907334  | -0.218567  | 0.362736  | 1.83772   | 1.44908  | 2.17347   | 0.832603   | 0.953384  | -0.0357698 |
| 1 | Akr1b8    | 0 | 0.714267   | 1.06269    | 1.24474    | 2.465     | 3.49979   | 2.49996  | 2.26521   | 1.27078    | 1.5899    | 0.876583   |
| 1 | Aldh16a1  | 0 | 0.182812   | -0.572164  | -0.632293  | 1.08008   | 2.44554   | 1.88041  | 1.4791    | 0.789298   | 0.125979  | 0.0801334  |
| 1 | Aldh1l2   | 0 | -0.0187783 | 0.189287   | 0.415967   | 1.91606   | 2.33741   | 2.36292  | 2.56273   | 1.61014    | 1.19833   | 0.695341   |
| 1 | Aldh3b1   | 0 | 0.08535    | 0.0291454  | 0.313157   | 0.979199  | 2.70015   | 2.47424  | 2.26242   | 1.04294    | 1.48669   | 0.925099   |
| 1 | Aldoart1  | 0 | 0.0948651  | -0.848711  | -0.667222  | -0.511687 | 0.795225  | -1.70046 | -2.85431  | -1.46861   | -1.38999  | -0.498574  |
| 1 | Alox5     | 0 | -1.02048   | -0.206866  | -1.38126   | 0.430855  | 1.04733   | 1.58331  | 1.3721    | -0.99193   | -0.543755 | 0.295609   |
| 1 | Alox5ap   | 0 | 0.108656   | -0.148869  | -0.0456106 | 0.545939  | 3.00175   | 1.89911  | 1.66468   | 0.527742   | 0.913131  | 0.240962   |
| 1 | Amdhd2    | 0 | -0.264287  | -0.675967  | -0.630105  | 0.419767  | 2.5401    | 1.36131  | 1.61947   | 0.319111   | 0.312063  | -0.04914   |
| 1 | Ang       | 0 | 0.137236   | -0.4157    | 0.0627228  | 0.0473225 | 2.25593   | 2.44845  | 1.92647   | 0.886418   | 0.911975  | 0.34149    |
| 1 | Apbb1ip   | 0 | -0.229219  | 0.0530021  | 0.435072   | 1.20923   | 2.25122   | 2.52516  | 2.37314   | 1.20094    | 1.08159   | 0.358773   |
| 1 | Apbb3     | 0 | -1.00173   | -2.53956   | -1.43044   | -2.02612  | -0.640106 | -2.78809 | -3.49161  | -1.43367   | -1.90717  | -1.37148   |
| 1 | Apobec1   | 0 | 0.0521667  | 0.0698079  | 0.22503    | 0.883444  | 2.63481   | 2.28233  | 2.14831   | 1.2804     | 1.63298   | 0.273048   |
| 1 | Apobec3   | 0 | 0.0113972  | 0.758946   | 0.891574   | 1.47546   | 3.12984   | 2.26745  | 2.23387   | 1.20278    | 1.20533   | 0.275437   |
| 1 | Apoc2     | 0 | 0          | 0          | 0.984655   | 1.02136   | 2.59452   | 2.30538  | 2.12464   | 1.40501    | 1.65774   | 0          |
| 1 | Arap1     | 0 | -0.126789  | -0.222208  | -0.224961  | 0.705439  | 2.06176   | 2.18804  | 2.37483   | 1.21273    | 1.3973    | 0.685336   |
| 1 | Arap3     | 0 | -0.872826  | -0.239558  | 0.346597   | 1.1248    | 2.3515    | 1.76018  | 0.98162   | 0.0008129  | -0.560102 | -0.0701652 |
| 1 | Arhgap11a | 0 | -0.0191995 | 0.405116   | 0.312543   | 1.2764    | 2.81122   | 2.42389  | 1.97229   | 0.798544   | 0.761601  | 0.158254   |
| 1 | Arhgap17  | 0 | 0.675988   | 0.50031    | 0.472357   | 1.23314   | 2.65967   | 2.6559   | 2.23851   | 0.652538   | 0.951782  | -0.112371  |
| 1 | Arhgap19  | 0 | -0.0020615 | -0.0515731 | -0.0963039 | -0.189749 | 1.86595   | 2.29042  | 2.30425   | 0.732508   | 0.749361  | -0.049975  |
| 1 | Arhgap22  | 0 | 0.0731594  | -0.405575  | -0.404747  | -0.364231 | 2.37909   | 1.44672  | 0.825626  | -0.772377  | -0.308259 | -0.810825  |
| 1 | Arhgap25  | 0 | -0.275386  | -0.613621  | -0.578632  | -0.118036 | 1.77147   | 2.00766  | 1.9061    | 0.914386   | 0.897444  | 0.0669512  |
| 1 | Arhgap30  | 0 | -0.288139  | 0.222798   | 0.279455   | 0.952383  | 2.3684    | 2.26857  | 2.38569   | 1.13502    | 1.48242   | 0.249933   |
| 1 | Arhgap4   | 0 | -1.04629   | -0.939401  | -0.991538  | -0.497562 | 1.47802   | 1.29961  | 1.66784   | -0.0301029 | 0.24226   | -0.370478  |

|   |               |   |            |            |           |            |           |           |           |            |           |            |
|---|---------------|---|------------|------------|-----------|------------|-----------|-----------|-----------|------------|-----------|------------|
| 1 | Arhgap9       | 0 | 0.280148   | -0.89325   | -0.176711 | 0.627527   | 1.93628   | 1.92284   | 2.03012   | 1.37946    | 1.59155   | 0.334764   |
| 1 | Arhgdib       | 0 | -0.367238  | -0.283609  | -0.35888  | 0.654716   | 2.47206   | 1.89741   | 1.91581   | 0.678603   | 0.957418  | 0.295405   |
| 1 | Arhgef19      | 0 | -0.426874  | -1.18035   | -2.71046  | -1.43252   | -0.463527 | 0.785868  | 0.189999  | -0.384833  | 0.675426  | -0.518947  |
| 1 | Arl11         | 0 | -0.440641  | -0.476463  | -0.245635 | 0.632007   | 2.06858   | 2.02521   | 1.95836   | 1.11754    | 1.33621   | 0.295234   |
| 1 | Arpc1b        | 0 | -0.0254821 | 0.291358   | 0.572416  | 1.69484    | 2.94343   | 2.28443   | 2.078     | 0.842059   | 1.02665   | 0.461154   |
| 1 | Arrb2         | 0 | 0.0623088  | -0.209384  | -0.442486 | 0.193074   | 2.67936   | 2.14598   | 1.31309   | 0.254968   | 0.425293  | 0.328612   |
| 1 | As3mt         | 0 | 0.660204   | 0.591794   | 0.49752   | 0.934821   | 2.99165   | 2.2524    | 2.83155   | 1.55328    | 1.92565   | 0.948702   |
| 1 | Asap3         | 0 | -0.395869  | 0.771111   | 0.656094  | 1.33697    | 2.61616   | 2.0559    | 2.28182   | 0.745496   | 1.09563   | -0.150422  |
| 1 | Aspm          | 0 | -0.853337  | -0.334663  | -0.787526 | -0.168652  | 2.44597   | 1.66781   | 0.816203  | 0.134795   | 0.3153    | 0.217901   |
| 1 | Atf5          | 0 | 0.435285   | 0.610683   | 0.604719  | 2.10442    | 3.44056   | 1.2745    | 1.2727    | 0.436127   | 0.73741   | 0.186655   |
| 1 | Atoh8         | 0 | 0.256407   | -0.161318  | 1.04555   | 0.99327    | 3.0646    | 2.09192   | 2.2426    | 1.53408    | 1.24984   | 0.670282   |
| 1 | Atp5g1        | 0 | -0.343706  | -0.920081  | -1.38597  | -0.210881  | 1.07473   | -1.74071  | -2.36517  | -1.62021   | -1.31612  | -1.77712   |
| 1 | Atp6ap1l      | 0 | -0.597898  | -1.20336   | -1.1808   | -0.802689  | 1.03564   | -1.79293  | -2.18896  | -1.58928   | -2.35749  | -1.72698   |
| 1 | Atp8b4        | 0 | -0.407028  | -0.896916  | -0.244455 | -0.244169  | 1.60944   | 0.564207  | 1.90485   | -0.558773  | 1.61006   | -0.466805  |
| 1 | Atxn7l2       | 0 | -1.04524   | -1.84966   | -1.82035  | -2.33327   | -0.700376 | -2.67795  | -2.60227  | -3.10876   | -3.11255  | -1.9106    |
| 1 | AU022793      | 0 | -1.30055   | -0.84531   | -0.203136 | 0.354491   | 1.51214   | 1.89368   | 1.37469   | 0.863759   | 0.890027  | -0.0001086 |
| 1 | Aurkb         | 0 | -0.185657  | 0.500295   | 0.57671   | 0.798267   | 3.0459    | 2.32117   | 1.63804   | 0.897267   | 0.460455  | 0.274868   |
| 1 | AW112010      | 0 | -0.0204067 | -0.9766    | -0.609367 | -0.0089058 | 1.31548   | 1.25837   | 2.37948   | 1.23114    | 1.25239   | 0.520941   |
| 1 | AY512931      | 0 | 0.784529   | -0.154215  | 0.137455  | -0.680853  | 1.47121   | -1.37484  | -0.957317 | -1.28215   | -0.590297 | -1.96074   |
| 1 | Azin2         | 0 | -1.02857   | -2.0235    | -3.86269  | -2.32415   | -1.81815  | -0.91696  | -1.47723  | -1.13318   | -1.62436  | -0.845466  |
| 1 | Bak1          | 0 | 0.218824   | 0.678029   | 1.3872    | 1.38963    | 3.28525   | 1.69151   | 1.20488   | 0.399921   | 0.0092729 | 0.0274886  |
| 1 | Bank1         | 0 | -0.524533  | -1.42133   | -2.62477  | -0.684135  | -0.758572 | -0.50677  | -1.11745  | -0.0461357 | 1.12478   | 0.540381   |
| 1 | BC021785      | 0 | 0.0551297  | 0.0788026  | -0.374617 | -0.425316  | 1.56822   | -1.15988  | -1.7935   | -1.32245   | -1.12391  | -1.80064   |
| 1 | BC028528      | 0 | -1.15737   | 0.187033   | -0.789763 | 0.0663151  | 1.86868   | 1.48244   | 1.74639   | 0.393928   | 0.232737  | -0.457368  |
| 1 | BC035044      | 0 | -0.865876  | 0.340708   | 0.471744  | 1.02008    | 2.4412    | 1.73267   | 1.93075   | 1.03788    | 1.47128   | -0.151067  |
| 1 | Bfsp2         | 0 | 0.707344   | 0.0032874  | -0.34464  | 0.339101   | 2.64565   | 2.20544   | 2.01928   | 1.60033    | 1.29906   | 1.27873    |
| 1 | Bgn           | 0 | -0.0772087 | -0.0982583 | -0.214718 | 0.350716   | 2.37754   | 2.27288   | 1.97072   | 0.840457   | 1.53093   | 0.601514   |
| 1 | Bin2          | 0 | -0.11518   | -0.251335  | -0.21422  | 0.901482   | 2.2448    | 2.27106   | 2.04866   | 0.907092   | 0.581931  | 0.0792539  |
| 1 | Birc5         | 0 | -0.38033   | -0.257062  | -0.182811 | -0.0780505 | 2.59392   | 1.41569   | 0.290743  | -0.459728  | -0.449221 | -0.871033  |
| 1 | Blvrb         | 0 | 0.279919   | -0.0181224 | 0.216409  | 1.28997    | 3.0549    | 1.70802   | 2.41322   | 0.800815   | 1.28154   | 0.986975   |
| 1 | Bmp4          | 0 | -0.727753  | -0.37499   | -0.902677 | -0.285887  | 1.56745   | 2.09984   | 1.5906    | 0.630073   | 0.652302  | 0.277198   |
| 1 | Bmyc          | 0 | -1.60863   | -2.3636    | -3.38107  | -1.18012   | -0.25857  | -1.83907  | -2.5977   | -1.86372   | -1.75232  | -0.848746  |
| 1 | Bnip2         | 0 | 0.334705   | 0.930773   | 0.871161  | 2.00551    | 3.16133   | 2.74461   | 2.47204   | 1.49477    | 1.59874   | 1.10294    |
| 1 | Brca1         | 0 | 0.332069   | 0.679055   | 0.45445   | -0.0368948 | 2.77992   | 2.46323   | 1.05628   | 0.503439   | -0.103785 | -0.033687  |
| 1 | Btd           | 0 | -0.135121  | -1.45694   | -0.725695 | 0.417299   | 1.81      | 1.63984   | 1.52092   | 0.569462   | 0.560748  | 0.341281   |
| 1 | Bub1          | 0 | 0.319583   | -0.254701  | 0.179656  | 0.669981   | 2.84178   | 2.05866   | 1.02219   | 0.0392162  | 0.443144  | -0.394122  |
| 1 | Bub1b         | 0 | 0.487551   | -0.243577  | 0.412873  | -0.0345772 | 2.83883   | 2.2245    | 1.1103    | -0.0428518 | 0.223922  | 0.354594   |
| 1 | C030029H02Rik | 0 | 0.753385   | -0.503446  | -0.364107 | -1.18257   | 1.23403   | -0.769297 | 0.647579  | 0.678111   | 1.57281   | 1.9002     |

|   |               |   |            |            |            |            |           |          |           |           |            |            |
|---|---------------|---|------------|------------|------------|------------|-----------|----------|-----------|-----------|------------|------------|
| 1 | C1qa          | 0 | 0.108616   | 0.0347636  | 0.0486019  | 0.641498   | 2.37461   | 2.3555   | 2.37618   | 1.43834   | 1.1811     | 0.371717   |
| 1 | C1qb          | 0 | 0.0329908  | 0.0559782  | 0.157446   | 0.735135   | 2.37373   | 2.39939  | 2.38481   | 1.41292   | 1.26418    | 0.372696   |
| 1 | C1qc          | 0 | 0.107024   | -0.116542  | -0.0872722 | 0.636829   | 2.23372   | 2.36518  | 2.27919   | 1.30401   | 1.15484    | 0.242471   |
| 1 | C1ql2         | 0 | -0.835592  | -0.770476  | -0.770109  | -0.565954  | 1.58508   | 0.386344 | 0.205664  | 1.01933   | 2.00276    | 1.00359    |
| 1 | C1qtnf4       | 0 | -0.631448  | -1.91732   | -2.57779   | -1.55939   | 0.702788  | -1.55487 | -2.57564  | -1.21442  | -1.39434   | -1.54978   |
| 1 | C1qtnf6       | 0 | 0.346241   | -1.12262   | 0.18087    | 1.1245     | 1.57717   | 1.93341  | 2.34745   | 0.360339  | 0.0076843  | 0.528274   |
| 1 | C1rl          | 0 | 1.40813    | 1.06367    | 1.47699    | 2.38017    | 3.50525   | 2.62545  | 2.1882    | 1.44234   | 1.31755    | 0.431744   |
| 1 | C230037L18Rik | 0 | -1.29119   | -1.26129   | -1.52728   | -0.184766  | 0.359667  | -0.48919 | -2.23099  | -1.68773  | -2.67359   | -2.20002   |
| 1 | C330027C09Rik | 0 | 0.103879   | 0.60596    | 0.566447   | 0.491341   | 3.02616   | 2.2619   | 1.61826   | 0.294196  | 0.453063   | 0.0330827  |
| 1 | C5ar2         | 0 | -0.453465  | 0.941441   | 0.455398   | 0.368465   | 2.4767    | 2.42364  | 2.02399   | 1.06992   | 1.03776    | 0.0185311  |
| 1 | Calb2         | 0 | 1.27403    | 0.409846   | 0.940405   | 0.739227   | 3.4478    | 0.374706 | -0.199803 | 0.758069  | 1.79873    | 1.0432     |
| 1 | Cald1         | 0 | 0.387402   | 0.742018   | 0.705387   | 1.67298    | 3.53169   | 2.31259  | 1.8032    | 0.888141  | 1.77876    | 1.08021    |
| 1 | Calhm2        | 0 | -0.818274  | -1.00858   | -1.01786   | -0.814549  | 1.71471   | 1.18589  | 1.06405   | 0.70989   | 1.00553    | 0.378293   |
| 1 | Capg          | 0 | 0.128936   | 0.51114    | 0.644142   | 1.71448    | 2.808     | 2.47047  | 2.32463   | 1.44017   | 2.04766    | 0.623751   |
| 1 | Capn3         | 0 | -0.529383  | -0.975473  | -0.875146  | -0.653145  | 1.61573   | 1.41115  | 1.5994    | 0.510142  | -0.321827  | -0.459176  |
| 1 | Car4          | 0 | -1.03414   | -1.15436   | -2.54001   | -3.27312   | -0.789767 | -2.24795 | -2.69173  | -1.51652  | -2.62908   | -2.31864   |
| 1 | Card9         | 0 | 0.554442   | 0.0121664  | 0.226933   | 1.38185    | 2.85892   | 2.53163  | 2.26633   | 1.3912    | 1.44703    | 1.0641     |
| 1 | Casc5         | 0 | 0.146835   | 0.143101   | -0.144201  | -0.0160802 | 2.64666   | 2.07819  | 1.48702   | 0.660578  | 0.732195   | -0.47261   |
| 1 | Casp1         | 0 | 0.0186193  | 0.0913476  | -0.517882  | 0.904791   | 2.29552   | 2.10609  | 2.27869   | 1.17798   | 1.56808    | 0.901139   |
| 1 | Casp6         | 0 | -0.0316056 | 0.264429   | 0.163971   | -0.0959451 | 2.50385   | 2.22411  | 1.88229   | 1.31398   | 1.04173    | -0.0736434 |
| 1 | Casp7         | 0 | -0.232462  | 0.181826   | -0.103312  | 0.260001   | 2.45542   | 1.99138  | 1.59223   | 0.251096  | 0.401569   | -0.688255  |
| 1 | Casp8         | 0 | -0.359115  | 0.116004   | 0.283931   | 1.18561    | 2.46857   | 2.32455  | 2.11419   | 0.888638  | 0.786646   | 0.156852   |
| 1 | Ccdc102a      | 0 | -0.403303  | -0.81915   | 0.221002   | 0.648286   | 2.04724   | 1.82492  | 1.84027   | 0.153719  | 1.63958    | 0.254278   |
| 1 | Ccdc109b      | 0 | 0.928616   | 0.7921     | 0.970101   | 1.24242    | 3.94494   | 1.62594  | 2.0823    | 1.37361   | 1.94059    | 1.682      |
| 1 | Ccdc122       | 0 | -0.522715  | -0.0041151 | 0.703205   | 1.30292    | 2.89377   | 1.8283   | 1.64553   | 0.190997  | 0.926796   | 0.370573   |
| 1 | Ccdc18        | 0 | 0.628085   | -0.0540736 | -0.173842  | 0.114313   | 2.93431   | 1.56663  | 0.445117  | 0.204135  | -0.0473528 | -0.682858  |
| 1 | Ccdc36        | 0 | -1.2015    | -1.19045   | -1.27211   | -1.25547   | 0.0563659 | -1.78233 | -3.28507  | -1.81426  | -2.01187   | -0.0662486 |
| 1 | Ccdc61        | 0 | -0.301047  | -2.39437   | -2.0461    | -0.57909   | 1.13771   | 0.450071 | -0.301819 | -0.326142 | -0.641863  | -0.26395   |
| 1 | Ccdc80        | 0 | -0.538618  | -0.253359  | 0.036253   | 0.718049   | 1.996     | 1.85066  | 2.11961   | 0.464391  | -0.232083  | -0.294173  |
| 1 | Ccdc88b       | 0 | -0.295376  | -0.440526  | -0.286086  | 0.516051   | 1.88123   | 2.21596  | 2.17125   | 0.798323  | 0.659753   | 0.103517   |
| 1 | Cchcr1        | 0 | -0.0899543 | -0.424526  | -0.423823  | 1.68345    | 2.30106   | 1.74348  | 1.70115   | 0.598177  | 0.719791   | -0.152141  |
| 1 | Ccna2         | 0 | 0.483034   | 0.222512   | 0.649042   | 0.591779   | 3.20117   | 2.42724  | 1.35685   | 0.480209  | 0.4258     | 0.478935   |
| 1 | Ccnb1         | 0 | 0.216915   | 0.0730518  | 0.773499   | -0.151433  | 2.74682   | 2.27647  | 1.21307   | 0.615732  | 0.186684   | -0.271958  |
| 1 | Ccnb2         | 0 | -0.633774  | 0.229613   | -0.0134703 | -0.518457  | 2.53956   | 1.77077  | 0.797346  | 0.263074  | 0.225099   | -0.637686  |
| 1 | Ccnd1         | 0 | -0.0349813 | 0.235063   | 0.524154   | 1.09961    | 2.94148   | 1.60121  | 0.632572  | 0.037716  | -0.550746  | -0.256945  |
| 1 | Ccr2          | 0 | -0.178814  | 0.0160339  | 0.620421   | 1.31952    | 2.84437   | 1.22493  | 2.35712   | 1.4496    | 1.72682    | 0.35175    |
| 1 | Cd151         | 0 | 0.0016794  | -0.0303433 | 0.300673   | 2.0165     | 2.45057   | 2.38705  | 2.21671   | 1.33327   | 1.27976    | 0.857104   |
| 1 | Cd180         | 0 | -0.42043   | -0.241022  | 0.0030457  | 0.993037   | 2.1762    | 2.30516  | 2.18525   | 1.08819   | 1.034      | 0.748245   |

|   |          |   |            |            |            |            |         |            |           |            |            |            |
|---|----------|---|------------|------------|------------|------------|---------|------------|-----------|------------|------------|------------|
| 1 | Cd248    | 0 | -1.07375   | -0.802298  | -0.404178  | 0.268501   | 2.19754 | 1.68802    | 0.856108  | 0.204431   | 0.106828   | -0.382128  |
| 1 | Cd300a   | 0 | 0.448746   | 0.666196   | 0.309057   | 0.502333   | 2.56487 | 2.25634    | 2.64604   | 1.29313    | 1.74991    | 0.159577   |
| 1 | Cd300lf  | 0 | 0.0850263  | 0.411217   | 0.471581   | 1.47135    | 2.76391 | 2.20903    | 2.44365   | 1.06106    | 1.43691    | 0.177738   |
| 1 | Cd300lh  | 0 | -0.330946  | -0.431847  | -0.226118  | 0.414689   | 1.98811 | 1.72073    | 1.50149   | 0.870687   | 1.17902    | -1.03383   |
| 1 | Cd33     | 0 | -0.461146  | -0.268458  | -0.860454  | -0.660068  | 1.21509 | 1.86135    | 2.0483    | 1.00257    | 0.426417   | 0.157408   |
| 1 | Cd37     | 0 | -0.0962206 | -0.0819112 | 0.0723359  | 0.351514   | 2.41423 | 2.23937    | 2.25515   | 1.21959    | 1.02006    | 0.443829   |
| 1 | Cd40     | 0 | 0.452593   | 0.510475   | 1.27437    | 1.86773    | 3.2838  | 2.17532    | 2.78414   | 1.22826    | 1.44411    | 1.13319    |
| 1 | Cd63     | 0 | 0.183857   | 0.32747    | 0.556296   | 1.83071    | 3.10983 | 2.24038    | 2.23796   | 1.28087    | 1.50451    | 0.847356   |
| 1 | Cd68     | 0 | -0.0902248 | 0.283592   | 0.259686   | 0.994689   | 2.43673 | 2.56282    | 2.17923   | 1.39327    | 1.41673    | 0.246978   |
| 1 | Cd72     | 0 | -0.172325  | 0.150228   | 0.100627   | 1.65348    | 2.29317 | 2.18066    | 2.18302   | 1.21293    | 1.56525    | 0.0820376  |
| 1 | Cd9      | 0 | 0.0576447  | 0.248802   | 0.576732   | 1.44715    | 2.51182 | 2.55543    | 2.60551   | 1.56221    | 1.52532    | 0.785617   |
| 1 | Cdc20    | 0 | -0.0843828 | 0.511004   | -0.103643  | 0.279805   | 2.37    | 1.52807    | 0.8624    | 0.157839   | -0.360864  | -1.4334    |
| 1 | Cdc42ep1 | 0 | -0.240812  | -1.73731   | -0.259319  | 1.7589     | 1.77778 | 0.811874   | 1.10713   | 0.418367   | 0.470093   | 0.503839   |
| 1 | Cdc42ep5 | 0 | 0.991682   | 0.0417848  | 0.918678   | 1.41554    | 3.20672 | 2.69503    | 1.53674   | 2.21421    | 1.74662    | 1.82824    |
| 1 | Cdc45    | 0 | 0.522342   | 0.630063   | 1.11456    | 0.559938   | 2.81665 | 3.00319    | 1.83943   | 0.973898   | 0.309658   | 0.656223   |
| 1 | Cdca2    | 0 | -0.172776  | -0.42154   | 0.355124   | 0.0741778  | 2.86518 | 2.03533    | 1.20922   | 0.412906   | 0.324079   | 0.469743   |
| 1 | Cdca3    | 0 | -0.0807749 | -0.0316506 | 0.15979    | -0.421836  | 2.48437 | 1.92124    | 0.89965   | 0.0393868  | -0.0806158 | -0.795184  |
| 1 | Cdca7l   | 0 | 0.675081   | 0.266257   | 0.872503   | 1.76493    | 1.8181  | 3.26447    | 1.79949   | 1.10921    | 0.872451   | -0.196388  |
| 1 | Cdca8    | 0 | 0.265045   | 0.0490174  | -0.0249694 | -0.0229335 | 2.84828 | 1.98076    | 1.13897   | 0.617087   | -0.169856  | -0.175665  |
| 1 | Cdk1     | 0 | -0.0749454 | -0.203846  | -0.356161  | 0.167471   | 2.73368 | 1.9317     | 0.97683   | 0.0447236  | -0.0213479 | -0.0906751 |
| 1 | Cdk2     | 0 | -1.1622    | -0.320028  | -0.470624  | 1.2397     | 1.93973 | 1.78521    | 1.22594   | -0.180266  | 0.580511   | 0.823541   |
| 1 | Cdkn1c   | 0 | 0.138232   | -0.0044928 | -0.287201  | -0.150669  | 2.35171 | 1.84342    | 1.06039   | 0.875052   | 2.17567    | 1.69425    |
| 1 | Cdkn2b   | 0 | 2.11792    | 0.340318   | 1.46567    | 2.57355    | 3.06698 | 3.12702    | 2.46303   | 1.89603    | 1.98209    | 1.61313    |
| 1 | Cdkn2c   | 0 | -0.15415   | -0.56538   | -0.442664  | 0.156683   | 2.63919 | 1.85487    | 1.27014   | 0.813376   | 0.222631   | 0.314828   |
| 1 | Cdkn3    | 0 | -0.192686  | -0.338323  | -0.103038  | -0.831585  | 2.63912 | 1.56377    | 0         | -0.419775  | -0.152045  | 0.138817   |
| 1 | Cdt1     | 0 | 1.17988    | 1.2053     | 1.52136    | 2.1102     | 3.76955 | 2.63752    | 1.39321   | 0.901032   | 1.01661    | 1.11249    |
| 1 | Cebpa    | 0 | 0.219957   | 0.232008   | 0.196324   | 0.729065   | 2.62975 | 2.59791    | 2.29562   | 0.902917   | 1.03851    | 0.555214   |
| 1 | Cela1    | 0 | -0.50879   | -0.346769  | 0.643722   | 1.21448    | 2.47039 | 2.22923    | 1.96719   | 0.938188   | 1.05669    | 0.584591   |
| 1 | Cenpa    | 0 | 1.59081    | 1.03826    | 0.628501   | -0.398565  | 2.62917 | 1.52696    | 0.914411  | -0.145131  | -0.2763    | -0.443619  |
| 1 | Cenpe    | 0 | -0.300831  | -0.0519287 | -0.0165382 | -0.0405463 | 2.90024 | 1.83939    | 0.883611  | 0.332462   | 0.0955292  | -0.0927353 |
| 1 | Cenph    | 0 | -1.09766   | -0.693726  | -0.935928  | 0.0750963  | 1.70131 | 1.15144    | -0.14142  | -0.238359  | -1.8621    | -0.509033  |
| 1 | Cenpi    | 0 | -0.0481086 | -0.0539351 | -0.122712  | 0.687715   | 2.85094 | 1.90174    | 0.854383  | 0.504545   | 0.0475156  | -0.467723  |
| 1 | Cenpm    | 0 | -0.327049  | -0.100373  | -0.0068807 | -0.193597  | 3.00123 | 1.04089    | -0.638661 | 0.158282   | 0.15405    | -0.217089  |
| 1 | Cenpn    | 0 | 0.879858   | 0.903362   | -0.0516344 | 0.743903   | 3.1269  | 1.75746    | 0.607454  | 0.161781   | -0.353875  | 0.0266395  |
| 1 | Cep55    | 0 | 0.188951   | -0.327266  | 0.196214   | 0.564839   | 2.897   | 2.11597    | 1.13922   | 0.359037   | 0.188141   | -0.0305363 |
| 1 | Cfap126  | 0 | 0.13562    | 0.702372   | 0.217976   | 0.700638   | 2.94499 | 1.92794    | 1.93791   | 1.68889    | 2.47992    | 1.43386    |
| 1 | Cfp      | 0 | 0.118205   | -0.281698  | 0.459459   | 0.524973   | 1.98523 | -0.0935779 | 2.23177   | -0.0540621 | 1.24431    | -1.11035   |
| 1 | Chaf1a   | 0 | 0.0069076  | -0.174847  | -0.480598  | 0.729316   | 2.71692 | 1.8879     | 1.29974   | -0.31033   | 0.509104   | 0.828695   |



|   |         |   |            |           |            |            |           |           |            |            |           |            |
|---|---------|---|------------|-----------|------------|------------|-----------|-----------|------------|------------|-----------|------------|
| 1 | Chd7    | 0 | 1.09755    | 1.08433   | 1.34851    | 1.46408    | 3.74844   | 2.3149    | 1.82852    | 0.949522   | 0.944217  | 0.452292   |
| 1 | Chek2   | 0 | -0.0246622 | -0.471613 | -0.114667  | 0.492365   | 2.81152   | 1.7662    | 1.13606    | 0.155168   | 0.0848305 | -0.215454  |
| 1 | Chil1   | 0 | 0.0788739  | 0.0926474 | 0.429305   | 1.59213    | 2.87924   | 0.749854  | 1.29908    | 2.5429     | 1.6115    | 0.48396    |
| 1 | Chil3   | 0 | -0.350264  | 0.65377   | 0.210098   | 1.50055    | 2.28894   | 2.34266   | 1.19652    | -0.325831  | 0.674241  | -0.302279  |
| 1 | Chst1   | 0 | -0.028705  | -0.745036 | -0.911095  | -1.10186   | 0.175944  | -2.10601  | -2.4405    | -2.14489   | -2.32586  | -1.89587   |
| 1 | Ciita   | 0 | -0.0278387 | -0.663869 | -0.141559  | 0.551485   | 2.14663   | 1.17025   | 2.26596    | 1.40011    | 1.85849   | 0.660488   |
| 1 | Cited4  | 0 | -0.456513  | -2.32795  | -1.39755   | -2.70868   | -0.984406 | -0.388698 | -2.47519   | -1.03918   | -2.3035   | -0.222146  |
| 1 | Ckap2   | 0 | -0.0225369 | 0.249035  | 0.431655   | 0.992732   | 2.74363   | 2.33228   | 1.43036    | 0.617355   | 0.297942  | -0.383127  |
| 1 | Ckap2l  | 0 | -0.314709  | -0.142041 | -0.0192168 | 0.0709745  | 2.70451   | 1.99131   | 0.972755   | 0.302078   | -0.192618 | -0.132683  |
| 1 | Cks1b   | 0 | -0.979009  | -0.354228 | -0.829203  | -0.136479  | 2.42834   | 1.15117   | 0.218601   | -0.46317   | -0.326064 | -0.787246  |
| 1 | Cks2    | 0 | 0.636162   | 0.646447  | 0.242422   | 0.636754   | 3.42987   | 2.23684   | 0.971531   | 0.495781   | 0.787576  | 0.430791   |
| 1 | Clcf1   | 0 | -0.0654001 | -0.300342 | 0.408015   | 1.81858    | 1.88779   | 0.844423  | 0.49976    | -0.122661  | -0.668131 | -1.47348   |
| 1 | Cldn11  | 0 | 0.172539   | 0.368171  | 0.55512    | 2.1633     | 2.72757   | 2.45202   | 1.54021    | 0.664043   | 0.355858  | 0.320495   |
| 1 | Cldn5   | 0 | -0.637026  | 0.0334336 | 0.389614   | 0.926231   | 3.08265   | 1.76335   | 1.02851    | 0.657919   | 1.37765   | 0.999391   |
| 1 | Clec14a | 0 | -0.379021  | 0.0505324 | 0.431753   | 0.870789   | 2.68473   | 2.47894   | 1.88194    | 1.16277    | 1.05817   | 0.843182   |
| 1 | Clec1a  | 0 | 0.382564   | 0.784749  | 0.547405   | -0.149362  | 2.75615   | 2.46088   | 1.99038    | 0.440549   | 1.77889   | 0.929211   |
| 1 | Clec4n  | 0 | 1.05412    | 1.50026   | 0.0653949  | 1.81121    | 2.30082   | 0.951713  | 2.7036     | 1.01845    | 2.14063   | -0.328293  |
| 1 | Clic1   | 0 | 0.378872   | 0.745594  | 1.10162    | 1.97299    | 3.25647   | 2.56051   | 2.309      | 1.30308    | 1.41447   | 0.670961   |
| 1 | Cln3    | 0 | 1.25473    | 0.793941  | 0.961538   | 0.733467   | 2.85664   | 3.14156   | 2.63326    | 1.17773    | 1.29818   | 0.862848   |
| 1 | Clspn   | 0 | -0.578271  | -1.12255  | -1.555     | -0.615127  | 1.89944   | 1.03989   | 0.0160963  | -0.767616  | -0.724628 | -0.891543  |
| 1 | Cmklr1  | 0 | -0.914506  | -0.46536  | -0.581898  | 0.524172   | 1.59174   | 1.70172   | 2.06231    | 0.448771   | 0.367931  | -0.308764  |
| 1 | Cmtm3   | 0 | 0.880467   | 0.791149  | 1.25343    | 1.31534    | 3.07654   | 2.71098   | 2.5297     | 1.24079    | 1.32727   | 0.160816   |
| 1 | Cmtm7   | 0 | 0.109562   | -0.364881 | -0.145826  | 0.124768   | 2.34644   | 1.91942   | 2.15695    | 0.822235   | 1.04792   | -0.0294751 |
| 1 | Cmtm8   | 0 | 0.062227   | 0.672437  | -0.220387  | 1.34533    | 3.03321   | 2.2472    | 1.75528    | 1.19842    | 1.59155   | 0.960061   |
| 1 | Cnn2    | 0 | 1.00299    | 0.234046  | 0.111019   | 1.61542    | 2.99382   | 2.34883   | 2.30665    | 1.18622    | 1.85549   | 0.780292   |
| 1 | Col16a1 | 0 | -0.46983   | -0.805753 | -0.453467  | 1.0936     | 2.30777   | 1.65673   | 1.33037    | 0.299047   | 0.0241234 | -0.057318  |
| 1 | Col20a1 | 0 | 0.270223   | 0.263584  | -0.347381  | 0.899667   | 1.66228   | 3.01143   | 0.913598   | 0.232187   | 0.105556  | -0.404595  |
| 1 | Col26a1 | 0 | -2.30855   | -2.45103  | -2.82759   | -1.79433   | -1.80624  | -0.351223 | -0.0723838 | -1.79214   | -1.82443  | -2.40385   |
| 1 | Col5a2  | 0 | -0.50536   | -0.191245 | -0.094336  | 0.402652   | 1.70494   | 2.488     | 2.12595    | 0.660661   | 0.811657  | 0.160629   |
| 1 | Col5a3  | 0 | 0.212882   | 0.442483  | 1.21349    | 1.58775    | 2.9777    | 2.32205   | 1.13513    | -0.0779391 | 0.899537  | 0.0874238  |
| 1 | Col7a1  | 0 | 0.0395123  | 0.144911  | 0.0271775  | 0.672729   | 1.90601   | 2.99978   | 1.32926    | 0.203423   | 0.115358  | -0.0710121 |
| 1 | Col9a2  | 0 | 0.0700883  | -0.455528 | -0.973217  | 0.540484   | 1.83759   | 1.50045   | 1.73434    | 0.729742   | 2.06134   | 1.0265     |
| 1 | Cotl1   | 0 | 0.202436   | 0.197875  | 0.442372   | 0.787673   | 2.92003   | 2.07241   | 1.79724    | 0.491321   | 0.538662  | -0.318344  |
| 1 | Cracr2b | 0 | -1.03373   | -0.958577 | -0.441929  | 0.0908882  | 1.74157   | 1.682     | 1.55254    | -0.0020228 | 0.417439  | 0.870852   |
| 1 | Crip1   | 0 | 0.67938    | 0.447454  | 0.869556   | 0.622444   | 3.23166   | 2.21615   | 2.30881    | 1.57963    | 2.30853   | 1.24577    |
| 1 | Crocc   | 0 | -1.01156   | -2.50128  | -3.39029   | -2.23772   | -1.82596  | -0.599263 | -1.18204   | -1.02181   | -0.772668 | -0.617833  |
| 1 | Crtap   | 0 | -0.149263  | 0.0577823 | -0.724229  | 1.10495    | 2.15498   | 2.22983   | 1.92332    | 1.20729    | 1.36495   | 0.954431   |
| 1 | Csf1r   | 0 | -0.078698  | -0.270208 | -0.385903  | -0.0781586 | 1.85259   | 2.08178   | 2.23761    | 0.82597    | 0.42659   | -0.0805111 |

|   |             |   |            |            |            |           |          |          |           |            |            |            |
|---|-------------|---|------------|------------|------------|-----------|----------|----------|-----------|------------|------------|------------|
| 1 | Csf2ra      | 0 | -0.433658  | -0.461949  | -0.578469  | -0.157342 | 2.39418  | 1.2148   | 1.14352   | 0.153272   | -0.144375  | -1.0379    |
| 1 | Csf2rb      | 0 | -0.144489  | 0.0234027  | 0.119581   | 1.02773   | 2.00404  | 1.64495  | 2.15435   | 0.674061   | 0.901684   | -1.0769    |
| 1 | Csf2rb2     | 0 | 0.0302125  | -0.0964134 | 0.508838   | 1.60575   | 2.28744  | 2.20315  | 2.57749   | 1.42271    | 1.61912    | 0.43133    |
| 1 | Csf3r       | 0 | 0.158718   | -0.0490798 | 0.0071361  | 0.132857  | 2.10663  | 2.18561  | 2.42414   | 1.38373    | 0.794721   | 0.0500309  |
| 1 | Csk         | 0 | -0.0928714 | -0.174195  | -0.0749408 | 1.03522   | 2.79385  | 2.0235   | 1.80862   | 0.573073   | 1.22307    | 0.445942   |
| 1 | Cspg4       | 0 | -0.114947  | -0.906483  | -0.745586  | -0.732621 | 1.69032  | 1.96708  | 1.33482   | -0.0267976 | -0.111948  | -0.104314  |
| 1 | Csrp2       | 0 | 0.597168   | 1.08477    | 1.05816    | 1.37325   | 3.6066   | 2.49561  | 2.16618   | 0.972997   | 2.14365    | 1.43875    |
| 1 | Cstb        | 0 | 0.894683   | 1.25312    | 1.3172     | 2.12081   | 3.67065  | 2.36724  | 2.21748   | 1.01016    | 1.88783    | 0.714196   |
| 1 | Ctdsp1      | 0 | -0.208514  | -0.46695   | 0.013139   | 1.02389   | 2.92784  | 1.59632  | 1.67457   | 0.774622   | 0.884216   | 0.431129   |
| 1 | Ctsa        | 0 | -0.0646541 | -0.205394  | -0.119922  | 0.331051  | 1.87659  | 2.47777  | 2.22628   | 0.908946   | 0.696627   | 0.0665018  |
| 1 | Ctsb        | 0 | 0.0830549  | 0.15039    | 0.242179   | 0.542792  | 2.30117  | 2.69385  | 2.26258   | 1.01851    | 1.0699     | 0.290531   |
| 1 | Ctsc        | 0 | -0.0187384 | -0.132919  | 0.202421   | 1.60684   | 2.34008  | 2.15268  | 2.33883   | 1.10524    | 1.31681    | 0.195675   |
| 1 | Ctsd        | 0 | 0.113425   | 0.0657834  | 0.121306   | 0.470468  | 2.39187  | 2.64483  | 2.21041   | 1.21032    | 1.04113    | 0.63145    |
| 1 | Ctse        | 0 | -1.36425   | -1.36425   | -0.611892  | 0.174452  | 1.22256  | 1.14107  | 1.35988   | 1.10147    | 0.775361   | 0.317847   |
| 1 | Ctsh        | 0 | 0.0211675  | -0.187102  | 0.0429793  | 0.347375  | 2.40642  | 2.14752  | 2.27123   | 1.34334    | 1.39893    | 0.63562    |
| 1 | Ctsl        | 0 | 0.291603   | 0.474172   | 0.594471   | 1.1805    | 2.75297  | 2.51169  | 2.47299   | 1.44815    | 1.97199    | 0.48042    |
| 1 | Ctsz        | 0 | 0.0798081  | 0.103121   | 0.266538   | 0.898784  | 2.46474  | 2.54673  | 2.37682   | 1.30887    | 1.25614    | 0.487398   |
| 1 | Ctxn2       | 0 | 1.28549    | 0.829695   | 0.726132   | 1.19675   | 2.94603  | 0.821785 | -0.746045 | 1.44107    | 1.30546    | 2.31729    |
| 1 | Cx3cr1      | 0 | -0.252717  | -0.392074  | -0.237314  | 0.706067  | 1.99518  | 2.06292  | 2.26257   | 0.717428   | 0.52522    | -0.0309725 |
| 1 | Cyba        | 0 | 0.213396   | 0.0635864  | 0.218354   | 0.907347  | 2.57174  | 2.40503  | 2.31195   | 1.48444    | 1.6592     | 0.531356   |
| 1 | Cyp27a1     | 0 | 0.142419   | 0.177191   | 0.234149   | -0.882087 | 2.58593  | 1.41005  | 2.11617   | 0.78234    | 0.929341   | 0.410529   |
| 1 | Cysltr1     | 0 | 0.277798   | -0.198734  | 0.632985   | 0.773664  | 2.40452  | 2.59788  | 2.35524   | 1.58373    | 1.31549    | 0.54819    |
| 1 | D17H6S56E-5 | 0 | 0.0520543  | 0.694987   | 0.715341   | 1.10723   | 2.87379  | 1.95994  | 1.38425   | 0.0331193  | -0.0003108 | -0.41919   |
| 1 | Dap         | 0 | -0.454838  | -0.404986  | 0.160689   | 1.14931   | 2.52499  | 2.07109  | 1.62057   | 0.841372   | 0.918202   | 0.071525   |
| 1 | Dbf4        | 0 | -0.146091  | 0.339265   | 0.341511   | 0.949521  | 3.13355  | 2.26183  | 1.31721   | 0.501093   | 0.450599   | 0.599124   |
| 1 | Dbi         | 0 | 0.711928   | 0.288963   | 0.755346   | 0.97487   | 3.42031  | 2.21876  | 2.17498   | 1.62977    | 1.83588    | 1.00804    |
| 1 | Dbp         | 0 | -1.36392   | -1.86825   | -2.2184    | -2.05239  | 0.714156 | -1.04382 | -0.593325 | -1.03542   | -1.97399   | 0.212701   |
| 1 | Dcn         | 0 | -0.28039   | 0.142801   | -0.0098525 | 1.15505   | 2.45773  | 1.35977  | 2.28236   | 1.68397    | 2.07193    | 0.692787   |
| 1 | Dcxr        | 0 | -0.286202  | -1.3511    | -0.475893  | 0.372904  | 1.59384  | 1.67066  | 1.70062   | 0.213332   | 0.389773   | -0.538377  |
| 1 | Ddah2       | 0 | -0.0153063 | -0.497352  | -0.66202   | 0.669648  | 2.92815  | 1.41803  | 1.06983   | 0.209172   | 0.539506   | 0.637415   |
| 1 | Ddias       | 0 | -0.0631284 | 0.187694   | 0.315222   | 1.78888   | 2.75144  | 2.15462  | 0.839473  | 0.03738    | 0.0069844  | 0.366784   |
| 1 | Ddx11       | 0 | 0.041751   | 0.466902   | 1.10318    | 0.680781  | 3.29558  | 1.92672  | 1.40151   | 0.630641   | 0.604779   | -0.0873008 |
| 1 | Def6        | 0 | -0.0567763 | 0.317974   | 0.368762   | 1.20396   | 2.53928  | 2.59741  | 2.31149   | 0.983748   | 0.941951   | 0.394802   |
| 1 | Dennd1c     | 0 | 0.609691   | 0.66129    | 0.0003044  | 0.515406  | 2.64984  | 2.52451  | 2.37053   | 1.54741    | 1.35282    | 0.378773   |
| 1 | Dera        | 0 | 0.201845   | 0.725602   | 0.508496   | 1.46856   | 3.01434  | 2.84914  | 2.14114   | 1.22179    | 1.63361    | 1.50029    |
| 1 | Dhrs1       | 0 | -0.0562309 | -0.172115  | -0.0152287 | 0.526481  | 2.47224  | 2.37014  | 2.07297   | 0.710511   | 0.718915   | 0.556816   |
| 1 | Dhrs4       | 0 | 0.526712   | 0.839136   | 0.575451   | 0.592223  | 3.54105  | 2.40469  | 1.56666   | 1.13049    | 1.28581    | 0.826789   |
| 1 | Dhx58       | 0 | -0.574     | -0.431009  | 0.131161   | 0.24634   | 1.76052  | 1.89674  | 2.25182   | 0.561894   | 0.78998    | -0.436445  |

|   |               |   |            |            |            |            |           |           |           |            |           |           |
|---|---------------|---|------------|------------|------------|------------|-----------|-----------|-----------|------------|-----------|-----------|
| 1 | Diap3         | 0 | 0.301726   | 0.390578   | 0.781054   | 0.710786   | 3.57982   | 1.96062   | 0.670409  | 0.729583   | 1.15153   | 0.520184  |
| 1 | Dkk2          | 0 | 0.931396   | 0.996497   | 1.06143    | 0.818693   | 3.08724   | 2.19788   | 2.50579   | 2.01581    | 0.888371  | 0.0110362 |
| 1 | Dlgap5        | 0 | -0.277221  | 0.439032   | 0.634803   | 0.351251   | 2.89252   | 2.16378   | 1.30308   | 0.349269   | 0.0269962 | 0.0107489 |
| 1 | Dna2          | 0 | -1.13327   | -0.0078802 | 0.0446416  | 0.457717   | 2.24492   | 1.94282   | 1.4166    | 0.317051   | 0.319899  | -0.264994 |
| 1 | Dnase2a       | 0 | 0.100305   | -0.107508  | 0.0337852  | 0.737223   | 2.60351   | 2.2861    | 2.06586   | 1.10374    | 1.08704   | 0.190547  |
| 1 | Dnm2          | 0 | 0.457706   | 0.315026   | 0.731841   | 1.69313    | 2.23965   | 3.03925   | 2.52358   | 1.27046    | 0.885223  | 0.518613  |
| 1 | Dock2         | 0 | -0.218837  | -0.201601  | -0.355049  | 0.563098   | 2.07179   | 2.16984   | 2.21001   | 1.13498    | 1.12598   | 0.322438  |
| 1 | Dock6         | 0 | -0.479533  | -1.23536   | -1.07446   | -0.55817   | 1.09115   | 1.87341   | 1.40117   | 0.156559   | 0.434744  | -0.258447 |
| 1 | Dock8         | 0 | -0.148421  | -0.118882  | -0.106006  | 0.375377   | 1.94852   | 2.40313   | 2.32109   | 1.04077    | 1.07085   | 0.264696  |
| 1 | Dpp7          | 0 | 0.531007   | 0.586958   | 0.584931   | 0.493822   | 2.76774   | 2.68768   | 2.46922   | 1.36844    | 1.40676   | 0.486134  |
| 1 | Dtl           | 0 | 0.235637   | 0.0060414  | -1.26707   | 0.334013   | -0.563181 | -0.644799 | -1.51356  | -1.41821   | -2.8012   | -1.89808  |
| 1 | Dusp27        | 0 | -1.38983   | -0.890806  | -0.625088  | -0.502659  | -0.378022 | 1.42818   | 0.0117779 | -0.657716  | -1.48665  | -2.4997   |
| 1 | Dynlrb2       | 0 | 0.332691   | 0.421495   | 0.438073   | 0.324394   | 2.82137   | 2.02045   | 1.81491   | 1.09544    | 1.84354   | -0.306834 |
| 1 | Dynlt1b       | 0 | -0.0681304 | -0.864759  | 0.289288   | 1.03827    | 2.1324    | -0.453068 | -0.275199 | -1.32165   | -1.04852  | -0.756148 |
| 1 | Dynlt1c       | 0 | 0.717655   | 0.545281   | 1.9027     | 1.7101     | 3.08103   | 2.89277   | 2.65695   | 1.67795    | 1.65622   | 0.924224  |
| 1 | Dynlt1f       | 0 | 1.14272    | -0.396838  | 0.25425    | 1.56169    | 1.98177   | 1.65609   | 1.47755   | 0.901827   | 1.60471   | 3.15818   |
| 1 | E030024N20Rik | 0 | 0.707099   | 0.620745   | 0.0663211  | 0.0984396  | 2.81054   | 1.23293   | 0.0538172 | -0.0800666 | 0.533908  | 2.43293   |
| 1 | E230029C05Rik | 0 | 0.937243   | 0.827462   | 0.980618   | 1.49981    | 3.50576   | 2.30634   | 2.92006   | 1.51225    | 1.22997   | 1.58349   |
| 1 | E2f2          | 0 | -1.00642   | -1.03334   | -0.210002  | -0.172544  | 1.84558   | 1.65439   | 0.765079  | 0.128313   | -0.658949 | -0.829154 |
| 1 | E2f8          | 0 | -0.425894  | 0.298298   | -0.0714198 | -0.213441  | 2.28921   | 1.95528   | 0.770751  | 0.0565938  | -0.817649 | -0.568715 |
| 1 | E430018J23Rik | 0 | -1.52175   | -1.49841   | -3.5163    | -1.77154   | -2.84369  | -1.23005  | -2.22334  | -2.12046   | -3.05039  | -2.85571  |
| 1 | EC12          | 0 | -0.652969  | -1.57519   | -1.05539   | -1.02912   | 1.14018   | -1.64453  | -1.48973  | -1.45693   | -1.94173  | -2.53402  |
| 1 | Ecm1          | 0 | 0.351812   | 0.651967   | 0.943945   | 1.51174    | 3.01814   | 2.70665   | 2.06915   | 1.05932    | 1.41936   | 0.187298  |
| 1 | Ecsr          | 0 | -0.942408  | -0.112464  | 0.361702   | 1.56194    | 2.36599   | 1.98011   | 1.25857   | 0.406683   | 0.19002   | 0.211547  |
| 1 | Ect2          | 0 | -0.217943  | -0.497009  | 0.311693   | -0.473046  | 2.34819   | 1.86283   | 1.46704   | 0.654916   | -0.435719 | 0.095299  |
| 1 | Eda2r         | 0 | 0.649478   | 0.668484   | 0.438017   | 3.21596    | 2.68796   | 2.08349   | 2.12047   | 1.80524    | 1.69816   | 1.44755   |
| 1 | Edem1         | 0 | -0.25983   | 0.214401   | 0.400293   | 0.900339   | 2.28665   | 2.60739   | 2.07279   | 0.373892   | 0.563292  | 0.156727  |
| 1 | Edem2         | 0 | 0.0071073  | -0.445117  | -0.768473  | -0.0328768 | 2.28476   | 1.83442   | 1.60776   | 0.252608   | 0.352751  | -0.190845 |
| 1 | Eef2kmt       | 0 | 0.852607   | 0.835676   | 1.09999    | 1.6496     | 3.96191   | 1.97811   | 1.80207   | 1.54087    | 1.57106   | 0.928406  |
| 1 | Efemp2        | 0 | 0.0301475  | -0.4611    | 0.0402955  | 0.997282   | 2.89772   | 1.70504   | 1.45466   | 0.616576   | 0.953073  | -0.149921 |
| 1 | Ehbp1l1       | 0 | 0.183745   | 0.447947   | 0.439401   | 1.34217    | 2.90049   | 2.25501   | 2.19509   | 0.529276   | 1.09777   | 0.119645  |
| 1 | Ehd4          | 0 | 0.0074226  | 0.598949   | 0.747637   | 1.23118    | 2.78699   | 2.49861   | 2.51828   | 0.783451   | 0.858337  | 0.593382  |
| 1 | Eif2ak2       | 0 | 0.579914   | 0.53203    | 0.858136   | 1.85099    | 2.51474   | 2.58015   | 2.8073    | 0.780077   | 1.03597   | 0.302209  |
| 1 | Elk3          | 0 | -0.598447  | 0.360017   | 0.551342   | 1.49121    | 2.50061   | 2.41548   | 1.89232   | 0.808185   | 0.947297  | 0.284035  |
| 1 | Eln           | 0 | -0.374932  | -0.326425  | 0.0157559  | 0.589436   | 1.14031   | 2.9373    | 1.3605    | -0.0174373 | 0.135887  | -0.258907 |
| 1 | Emcn          | 0 | -0.174386  | 1.09656    | 0.185689   | 2.36033    | 2.52561   | 2.53345   | 1.12063   | 1.03284    | 0.821016  | 0.339958  |
| 1 | Emilin1       | 0 | -0.798683  | -0.488695  | -0.0550586 | 0.360013   | 2.20841   | 1.93815   | 1.68813   | 0.493704   | 0.986968  | 0.0587097 |
| 1 | Eml3          | 0 | 0.372179   | 0.330604   | 0.766313   | 1.3719     | 3.26572   | 2.44452   | 1.96082   | 0.844939   | 1.39909   | 0.614101  |

|   |          |   |            |            |           |            |           |            |           |           |           |            |
|---|----------|---|------------|------------|-----------|------------|-----------|------------|-----------|-----------|-----------|------------|
| 1 | Emp3     | 0 | -0.224884  | -0.159354  | 0.411054  | 1.39239    | 2.88465   | 2.03375    | 1.72765   | 1.00756   | 1.51922   | 0.514096   |
| 1 | Enkur    | 0 | 0.118224   | -0.320993  | -0.879575 | -0.309265  | 1.60939   | 1.01966    | 0.790523  | 1.48907   | 2.05552   | 1.80783    |
| 1 | Enpp6    | 0 | -0.175189  | -0.088964  | -0.235249 | 0.260663   | 1.77468   | 2.62891    | 2.12418   | 1.16796   | 0.555459  | 0.683517   |
| 1 | Entpd1   | 0 | 0.376829   | 1.32162    | 0.0173902 | 1.03759    | 2.16841   | 2.35434    | 2.81228   | 1.11598   | 0.760229  | -0.0322654 |
| 1 | Ephb4    | 0 | -0.482774  | 0.0959527  | 0.419586  | 1.99854    | 2.76598   | 1.92176    | 1.7535    | 0.804526  | 1.05665   | 0.729866   |
| 1 | Erich2   | 0 | -0.063335  | 0.335233   | 0.20505   | 1.85957    | 2.82849   | 1.14046    | 1.16859   | 1.83794   | 2.5122    | 1.08313    |
| 1 | Ermard   | 0 | 0.137113   | -0.156655  | 0.864879  | 2.68752    | 2.48592   | 2.15708    | 1.95749   | 1.39996   | 0.960277  | 1.01899    |
| 1 | Espl1    | 0 | -0.381057  | -0.75428   | 0.517014  | 0.253631   | 2.22148   | 1.91369    | 0.906982  | -0.14161  | -0.206117 | -0.784086  |
| 1 | Esyt1    | 0 | 0.215171   | 0.153108   | 0.624355  | 0.970561   | 2.55162   | 2.58291    | 2.31165   | 0.847608  | 1.52354   | 0.177006   |
| 1 | Ezh2     | 0 | 0.175555   | 0.46226    | 0.414098  | 0.889409   | 3.46952   | 1.8155     | 0.80767   | 0.420232  | 0.73711   | 0.151847   |
| 1 | F11r     | 0 | 0.239192   | 0.0119518  | 0.476409  | 1.11357    | 2.91306   | 2.32506    | 2.35046   | 0.998279  | 1.10743   | 0.757269   |
| 1 | F13a1    | 0 | 0.0106553  | 0.152684   | 0.38409   | 1.39018    | 2.753     | 2.15026    | 2.0032    | 0.662834  | 0.880414  | -0.136765  |
| 1 | Fabp5    | 0 | 0.0797836  | 0.203928   | 0.185482  | 0.413245   | 3.09302   | 1.83358    | 2.12468   | 1.14068   | 1.29204   | 0.740721   |
| 1 | Fabp7    | 0 | 0.957316   | 0.31796    | 0.516133  | 0.954868   | 3.55416   | 1.99278    | 1.47331   | 0.745612  | 1.05211   | 0.253774   |
| 1 | Fadd     | 0 | -0.897118  | -0.505621  | -1.06487  | 0.332963   | 1.70681   | 1.66718    | 1.32593   | 0.556942  | 0.22289   | -0.715892  |
| 1 | Fam105a  | 0 | -0.161421  | -0.016846  | -0.198098 | -0.561259  | 1.97673   | 2.20134    | 1.8869    | 0.7599    | 0.719813  | -0.13487   |
| 1 | Fam111a  | 0 | 0.129783   | 0.0598846  | 0.32695   | 1.65755    | 2.75823   | 2.37053    | 1.9124    | 1.23193   | 1.2656    | 0.209818   |
| 1 | Fam167b  | 0 | 0.522487   | 0.0226703  | 0.184495  | 0.572729   | 2.65588   | 2.35162    | 2.42558   | 1.42824   | 1.11063   | 0.520528   |
| 1 | Fam183b  | 0 | 0.531794   | -0.169682  | -0.799413 | 0.719785   | 1.7592    | 0.856476   | 1.14042   | 1.4358    | 2.46994   | 2.1008     |
| 1 | Fam212a  | 0 | 0.132403   | 0.0933817  | -0.267898 | 0.553097   | 2.80918   | 2.19679    | 1.89719   | 1.03961   | 1.32292   | 1.06399    |
| 1 | Fam216b  | 0 | 0.0506778  | -1.23358   | -0.602557 | 0.239848   | 1.5304    | 0.930861   | 1.37909   | 1.61894   | 1.72327   | 1.32831    |
| 1 | Fam227a  | 0 | -0.26815   | -0.967895  | -0.994728 | -0.898606  | -0.036919 | -1.94044   | -2.89789  | -2.12538  | -2.53776  | -1.62956   |
| 1 | Fam46c   | 0 | 1.04078    | 1.40325    | 1.07776   | 1.31215    | 2.86239   | 3.09131    | 3.12765   | 1.72768   | 1.36559   | 0.880314   |
| 1 | Fam64a   | 0 | -0.0207899 | 0.0262953  | -0.129455 | 0.0520003  | 2.52202   | 1.69177    | 0.833034  | -0.845623 | -0.204147 | -0.572559  |
| 1 | Fam72a   | 0 | 0.80687    | -0.0138146 | 0.497977  | 0.626257   | 2.24353   | 2.03607    | 0.671546  | 0.357125  | 1.10822   | -1.43266   |
| 1 | Fanci    | 0 | -0.44793   | -0.313798  | -0.932437 | -1.04947   | 2.00671   | 1.73       | 1.04899   | 0.256272  | 0.132028  | 0.602508   |
| 1 | Fblim1   | 0 | 0.250269   | 0.55051    | 0.430143  | 1.26764    | 2.78228   | 2.50294    | 2.31698   | 1.32037   | 1.54112   | 0.170652   |
| 1 | Fbl1     | 0 | -0.731726  | -2.65869   | -3.36625  | -1.29617   | -0.438512 | -1.82023   | -1.40575  | -1.45774  | -0.862759 | -0.502007  |
| 1 | Fbln2    | 0 | 0.801321   | 0.759162   | 1.26503   | 1.47073    | 3.28468   | 2.82858    | 1.55557   | 1.15093   | 0.91494   | 0.191997   |
| 1 | Fbn2     | 0 | -0.590674  | 0.309213   | -0.335143 | 0.195505   | 2.75961   | 1.70725    | 0.542518  | -0.235317 | -0.178116 | -0.0923359 |
| 1 | Fbxl12os | 0 | 0.647772   | -1.30488   | 0.234232  | -0.0362667 | 0.282097  | -0.0343082 | -0.714062 | -2.16299  | -1.40297  | -2.1407    |
| 1 | Fbxo36   | 0 | 1.2658     | 1.10306    | 1.95178   | 1.42092    | 3.63082   | 3.07029    | 2.45234   | 1.73831   | 2.54595   | 2.02234    |
| 1 | Fbxo5    | 0 | -0.0844135 | -0.0478952 | 0.125688  | -0.114573  | 2.8502    | 1.31534    | 0.692504  | 0.0603071 | 0.0828092 | -0.994956  |
| 1 | Fcer1g   | 0 | 0.0386692  | 0.35888    | 0.307921  | 1.03802    | 2.74549   | 2.46501    | 2.2124    | 1.32682   | 1.35685   | 0.35281    |
| 1 | Fcgr1    | 0 | -0.487586  | -0.364893  | -0.132621 | 0.809077   | 2.1696    | 1.89573    | 2.09362   | 0.807195  | 0.929494  | -0.11578   |
| 1 | Fcgr3    | 0 | 0.237751   | 0.357164   | 0.579455  | 1.13058    | 2.43509   | 2.5057     | 2.69588   | 1.67653   | 1.47319   | 0.323457   |
| 1 | Fcgrt    | 0 | -0.311857  | -0.887684  | -1.18738  | -0.433884  | 1.60434   | 1.45728    | 1.62357   | 0.874598  | 0.783933  | 0.574016   |
| 1 | Fcrls    | 0 | -0.0609421 | 0.112328   | 0.054195  | 1.1681     | 2.45214   | 2.28762    | 2.18465   | 1.19264   | 0.721977  | 0.0271618  |

|   |         |   |           |            |            |           |           |          |          |            |           |            |
|---|---------|---|-----------|------------|------------|-----------|-----------|----------|----------|------------|-----------|------------|
| 1 | Fermt3  | 0 | -0.415101 | -0.519962  | -0.074743  | 1.00299   | 1.9076    | 2.02293  | 2.14235  | 0.767345   | 0.755119  | -0.193465  |
| 1 | Fes     | 0 | 0.0801412 | 0.329401   | 0.440567   | 1.41627   | 2.47403   | 2.28573  | 2.46401  | 1.4165     | 1.34608   | -0.0432933 |
| 1 | Fgd2    | 0 | -0.348092 | -0.506019  | -1.03357   | -0.163343 | 1.86487   | 1.85533  | 1.6985   | 0.466821   | 0.391494  | 0.0334923  |
| 1 | Fgd3    | 0 | -0.053305 | 0.605907   | 0.540928   | 1.57299   | 2.91951   | 1.11701  | 2.06299  | 0.649682   | 0.621206  | -0.516872  |
| 1 | Fgfr1   | 0 | -0.376773 | -0.460221  | -0.335069  | 1.26089   | 2.71206   | 1.42282  | 1.21043  | 0.460531   | 0.441372  | -0.248217  |
| 1 | Fhod1   | 0 | -0.230703 | -0.084841  | 0.622563   | 0.938768  | 2.28427   | 2.58044  | 1.89626  | 0.930056   | 0.770672  | -0.160289  |
| 1 | Figl1   | 0 | 0.221153  | 0.360714   | -0.367073  | 1.04471   | 2.88591   | 2.37638  | 1.4119   | 0.551191   | 0.610017  | 0.415897   |
| 1 | Fkbp10  | 0 | -0.451014 | -0.419479  | -0.384504  | 0.996209  | 2.43581   | 1.96049  | 1.71269  | 0.50266    | 0.710416  | 0.65935    |
| 1 | Fkbp7   | 0 | -0.531457 | -0.444315  | -0.0023239 | -0.229433 | 2.18617   | 1.59581  | 1.89704  | 0.661377   | 1.39949   | -0.0215655 |
| 1 | Fli1    | 0 | -0.616354 | -0.0645124 | 0.336371   | 0.92796   | 2.15071   | 2.10637  | 2.27619  | 0.864164   | 0.918025  | -0.0048921 |
| 1 | Flna    | 0 | 0.211197  | 0.77401    | 0.699531   | 2.23373   | 2.48896   | 2.57847  | 2.35289  | 1.01258    | 1.38806   | 0.122795   |
| 1 | Fmnl3   | 0 | -0.445858 | -0.247131  | 0.250831   | 0.739714  | 2.146     | 2.33886  | 2.08576  | 1.14916    | 1.02796   | 0.156603   |
| 1 | Fmo1    | 0 | -0.398609 | -0.149436  | -0.183653  | -0.620096 | 1.92722   | 1.59785  | 2.06335  | 1.23398    | 0.033096  | -0.0970907 |
| 1 | Fn1     | 0 | -0.131851 | 0.321367   | 0.323209   | 1.38062   | 2.3984    | 2.42999  | 2.26222  | 0.729249   | 0.806245  | 0.0147477  |
| 1 | Folr2   | 0 | -0.205412 | -0.747091  | 0.114395   | 0.94797   | 2.02452   | 2.18981  | 1.88071  | 0.711384   | 1.10783   | -0.113242  |
| 1 | Foxm1   | 0 | 0.292849  | -0.0583415 | 0.372073   | 0.446498  | 2.88801   | 2.00892  | 1.22165  | -0.0724541 | -0.137057 | -0.0654411 |
| 1 | Foxq1   | 0 | 0.956359  | 0.66801    | 0.402787   | 1.2236    | 3.57132   | 2.44735  | 1.0345   | 1.08775    | 1.34647   | 1.93342    |
| 1 | Frat2   | 0 | 0.507696  | 0.109336   | -0.462971  | -0.658345 | 1.65238   | -1.49826 | -1.63282 | -1.5242    | 0.100624  | 0.202758   |
| 1 | Frmnd8  | 0 | 0.0237616 | -0.412359  | 0.235807   | 1.11378   | 3.01105   | 1.97106  | 1.56374  | 0.968608   | 0.905624  | 0.494872   |
| 1 | Frrs1   | 0 | 0.157942  | 0.751128   | 0.582818   | 0.833328  | 3.36181   | 2.28411  | 1.90374  | 0.649304   | 1.11697   | 0.806838   |
| 1 | Fstl1   | 0 | 0.280641  | 0.61145    | 0.93936    | 1.88828   | 2.59021   | 2.62038  | 2.33621  | 0.574052   | 0.872611  | 0.15274    |
| 1 | Ftl1    | 0 | 0.0814114 | -0.169763  | -0.0638506 | 1.00207   | 2.86326   | 2.06188  | 1.46532  | 0.656854   | 1.0214    | -0.0688098 |
| 1 | Fuca1   | 0 | 0.364702  | 0.306077   | 0.38912    | 0.626596  | 3.0676    | 2.6102   | 1.96255  | 1.21384    | 1.12898   | 1.00291    |
| 1 | Fxyd1   | 0 | 0.388639  | 0.260069   | 0.423865   | 0.781398  | 2.9504    | 2.20598  | 2.11778  | 1.89395    | 2.06599   | 1.78856    |
| 1 | Fxyd5   | 0 | -0.216826 | 0.35603    | 0.851823   | 1.39484   | 2.72217   | 2.30526  | 2.1944   | 0.838015   | 1.5908    | 0.225345   |
| 1 | Fxyd7   | 0 | -0.401187 | -1.24389   | -2.05913   | -2.37174  | 0.0412528 | -2.39518 | -2.39699 | -2.10933   | -2.53333  | -1.62863   |
| 1 | Fyb     | 0 | 0.237483  | 0.338039   | 0.623136   | 1.14922   | 2.59911   | 2.59373  | 2.5061   | 1.40538    | 1.32159   | 0.253901   |
| 1 | Gal3st1 | 0 | -0.589074 | -0.732962  | -0.674555  | 0.727176  | 2.31408   | 1.68867  | 1.10256  | 0.851883   | 0.4649    | -0.166781  |
| 1 | Gal3st4 | 0 | -0.379464 | -0.558508  | -0.867964  | 0.118821  | 1.80745   | 1.8273   | 1.757    | 0.788466   | -0.229441 | -0.0735479 |
| 1 | Galm    | 0 | 1.33721   | 0.171048   | 0.226215   | 0.732004  | 2.39672   | 2.67341  | 2.8325   | 1.63586    | 1.44323   | 1.2532     |
| 1 | Galns   | 0 | -0.642285 | -0.704777  | -0.182299  | -0.160892 | 1.8517    | 1.91084  | 1.40799  | -0.002186  | 0.0506404 | -0.801638  |
| 1 | Galnt12 | 0 | 0.230587  | -0.501546  | -0.505834  | -0.192531 | 1.88804   | 2.47035  | 1.63025  | 0.595431   | 0.939247  | 0.268515   |
| 1 | Galt    | 0 | -1.67109  | -1.61      | -1.74456   | -1.82312  | -0.548765 | -2.64624 | -2.7217  | -2.43172   | -3.55868  | -2.26459   |
| 1 | Gas2l3  | 0 | 0.472402  | 0.394725   | 1.25355    | 0.340325  | 2.33076   | 1.89552  | 2.56344  | 0.401442   | 0.735506  | -0.594614  |
| 1 | Gas6    | 0 | -0.068819 | -0.26871   | -0.101675  | 0.0314547 | 1.58259   | 2.75324  | 2.03382  | 0.7538     | 0.798873  | 0.37203    |
| 1 | Gba     | 0 | -0.479416 | -0.235067  | 0.377181   | 0.700475  | 2.43731   | 2.30907  | 1.5218   | 0.408607   | 0.294098  | -0.0918959 |
| 1 | Gbp7    | 0 | -0.187805 | 0.394161   | 0.600945   | 1.34904   | 2.53414   | 2.20987  | 2.65697  | 0.852615   | 1.04367   | 0.35649    |
| 1 | Gcnt1   | 0 | 0.270401  | 0.496911   | 0.334571   | 1.23783   | 2.33283   | 2.78131  | 2.4114   | 1.0349     | 0.728096  | 0.133247   |

|   |         |   |           |            |            |            |            |           |           |           |            |            |
|---|---------|---|-----------|------------|------------|------------|------------|-----------|-----------|-----------|------------|------------|
| 1 | Gdf1    | 0 | -1.96746  | -2.7289    | -3.07759   | -1.47673   | -2.77138   | -3.14787  | -3.14022  | -2.91449  | -3.24909   | -3.13094   |
| 1 | Ggt5    | 0 | 0.250175  | -0.19277   | -0.747478  | 0.542316   | 1.68412    | 2.46213   | 1.75498   | 1.21836   | 1.1934     | -0.137614  |
| 1 | Gins1   | 0 | 0.34364   | 1.25374    | 0.785279   | 1.72838    | 3.03327    | 2.48623   | 1.56326   | 0.580108  | 0.689398   | -0.0810804 |
| 1 | Gins2   | 0 | -0.177802 | 0.392103   | -0.226683  | 1.15825    | 2.6055     | 2.05675   | 1.46654   | 0.584321  | 0.116173   | -0.37861   |
| 1 | Gja4    | 0 | 2.29745   | 1.33686    | -0.194175  | 1.77495    | 2.77056    | 2.77096   | 0.714734  | 0.907306  | 1.10706    | 1.20411    |
| 1 | Glipr1  | 0 | -0.044553 | -0.540312  | 0.215641   | 1.03127    | 2.00859    | 1.95193   | 1.78193   | 0.998282  | 1.56271    | -0.650465  |
| 1 | Glipr2  | 0 | 0.296815  | 0.300931   | 0.543812   | 2.41589    | 2.65377    | 2.06238   | 1.92006   | 0.720099  | 1.06169    | -0.0442981 |
| 1 | GImp    | 0 | 0.0941654 | -0.320271  | 0.0591766  | -0.0640542 | 2.58498    | 2.14591   | 1.35122   | 0.0857744 | 0.208221   | -0.122363  |
| 1 | Glrp1   | 0 | 0.628418  | 0.723081   | 0.980866   | 1.15934    | 2.98129    | 2.94765   | 2.69183   | 1.45273   | 1.26208    | 0.974341   |
| 1 | GltP    | 0 | 0.0564888 | 0.0016143  | 0.0823908  | 0.993656   | 3.03358    | 1.78975   | 1.57361   | 0.299524  | 0.290027   | 0.0404478  |
| 1 | Gm10094 | 0 | 0.0264626 | -0.921055  | -2.93507   | -0.597832  | 0.308839   | 0.403519  | 0.277405  | 0.350332  | 0.328586   | 0.365654   |
| 1 | Gm11681 | 0 | 1.87288   | 1.34692    | 0.8351     | 0.272526   | 2.80721    | 1.00575   | 1.51383   | 2.55788   | 1.51607    | 3.10505    |
| 1 | Gm13139 | 0 | 0.52169   | 0.288336   | 0.351109   | 1.38717    | 2.79483    | 2.30283   | 2.60131   | 1.7803    | 1.76397    | 0.671012   |
| 1 | Gm20172 | 0 | 0.67924   | -0.177756  | -0.7598    | -0.388418  | 1.43359    | -1.38007  | -2.1951   | -1.25551  | -0.939549  | -0.332623  |
| 1 | Gm29683 | 0 | -0.535239 | -0.406088  | -0.528764  | -0.750283  | 0.832671   | -1.23568  | -1.45759  | -1.8108   | -1.99094   | -2.70279   |
| 1 | Gm3230  | 0 | -0.602997 | -0.940521  | -1.21708   | -1.42125   | 0.279825   | -2.28924  | -2.58647  | -1.56151  | -2.8542    | -1.58416   |
| 1 | Gm3414  | 0 | 0.69752   | 1.06997    | 1.38636    | 1.52695    | 3.28798    | 1.51827   | 2.32953   | 0.247677  | 0.289513   | 0.364919   |
| 1 | Gm4285  | 0 | 0.634042  | 0.499543   | -0.210696  | 1.6183     | 2.29289    | 0.952633  | -0.866257 | -0.664432 | -0.485294  | -0.375428  |
| 1 | Gm4980  | 0 | -0.373059 | -1.62317   | -1.67892   | -0.629675  | -0.223877  | 1.92847   | 0.509671  | -1.01083  | -0.49376   | -0.458705  |
| 1 | Gm5086  | 0 | -0.914119 | -1.03369   | -1.3606    | -0.452122  | 0.970228   | 1.65352   | 1.40568   | 0.356994  | 0.471488   | -0.309124  |
| 1 | Gm5523  | 0 | -0.670159 | -0.937446  | -0.383235  | -0.986917  | -0.0717347 | -0.424883 | -2.29394  | -1.72279  | -2.93434   | -2.28086   |
| 1 | Gm6548  | 0 | -0.329899 | 0.149341   | 0.54509    | 0.92117    | 2.50408    | 1.84055   | 1.82425   | 0.0880651 | 0.0546332  | -0.524098  |
| 1 | Gm6682  | 0 | -0.510468 | -2.54151   | -1.8698    | -3.09453   | 0.0821273  | -0.874588 | -1.03587  | -1.31917  | -0.636246  | -0.784328  |
| 1 | Gm7609  | 0 | 0.462042  | -0.0111109 | -0.0554613 | 0.0146291  | 1.17559    | -1.1836   | -1.42347  | -1.99632  | -1.29273   | -1.56814   |
| 1 | Gm973   | 0 | 0.435423  | -0.199564  | -0.273527  | -0.0217718 | 2.64776    | 1.48752   | 1.29597   | 1.42141   | 1.97751    | 1.65772    |
| 1 | Gmfg    | 0 | 0.141945  | 0.140828   | 0.154689   | 0.4625     | 2.86946    | 2.05963   | 2.18766   | 1.28746   | 1.09881    | 0.362434   |
| 1 | Gmip    | 0 | -0.306336 | -0.602734  | -0.317962  | -0.0718304 | 1.89347    | 1.85244   | 1.74255   | 0.212657  | -0.0706179 | -0.720277  |
| 1 | Gmpr    | 0 | -0.869661 | -2.68032   | -3.1463    | -1.36045   | -0.151777  | -0.881379 | -0.871864 | -0.774729 | -0.74198   | -0.224948  |
| 1 | Gna15   | 0 | -0.922909 | -0.320467  | -0.290668  | 0.446332   | 1.96701    | 1.82303   | 1.74576   | 0.464521  | 0.138209   | -0.454904  |
| 1 | Gnai2   | 0 | 0.117413  | 0.0928426  | 0.153981   | 0.649574   | 3.2898     | 1.93522   | 1.46029   | 0.823976  | 1.02728    | 0.464968   |
| 1 | Gng11   | 0 | 0.221812  | 0.287606   | 0.356239   | 0.637651   | 3.59652    | 1.21754   | 1.04284   | 1.17109   | 1.60432    | 1.42976    |
| 1 | Gng5    | 0 | 0.282421  | 0.22374    | 0.673066   | 1.24825    | 3.14152    | 2.61812   | 1.76854   | 1.20208   | 1.21259    | 0.578075   |
| 1 | Gngt2   | 0 | -0.115887 | -0.237358  | 0.196843   | 0.378559   | 2.43332    | 1.887     | 2.22773   | 1.06281   | 1.52319    | 0.117983   |
| 1 | Golm1   | 0 | 0.0250446 | 0.577888   | 0.646978   | -0.0419358 | 1.86042    | 2.44897   | 1.9626    | 0.491549  | -0.34398   | -0.474955  |
| 1 | Gp1bb   | 0 | -0.302371 | -0.783471  | -0.849755  | -0.985101  | 0.575837   | -1.63093  | -2.1744   | -1.86005  | -2.23696   | -2.47778   |
| 1 | Gpr157  | 0 | 0.222007  | 0.220146   | 0.319892   | -0.03685   | 2.32017    | 2.21031   | 1.91453   | 0.0583405 | 0.165987   | -0.457024  |
| 1 | Gpr183  | 0 | 0.859803  | 1.04982    | 1.31419    | 1.41896    | 2.79951    | 2.41001   | 2.87977   | 1.70051   | 1.29364    | -0.133349  |
| 1 | Gpr34   | 0 | -0.368464 | -0.599329  | -0.788022  | -0.652474  | 1.30086    | 1.9953    | 1.8636    | 0.793912  | 0.323809   | 0.102015   |

|   |            |   |            |            |            |            |           |          |           |            |           |            |
|---|------------|---|------------|------------|------------|------------|-----------|----------|-----------|------------|-----------|------------|
| 1 | Gpsm3      | 0 | -0.260116  | -1.48501   | -0.590549  | 0.226459   | 1.70724   | 1.42893  | 1.59673   | 0.546065   | 0.390603  | -0.481599  |
| 1 | Gpx1       | 0 | -0.122301  | -0.278782  | -0.441339  | 0.67125    | 2.85996   | 1.64645  | 1.27625   | 0.22959    | 0.798143  | -0.0482979 |
| 1 | Gpx3       | 0 | 0.806667   | 0.154299   | 0.43322    | 1.34654    | 2.95102   | 2.77442  | 1.74419   | 1.07618    | 2.20582   | 1.09865    |
| 1 | Gpx8       | 0 | -0.025732  | 0.471511   | 0.822837   | 1.1522     | 3.09138   | 2.29026  | 2.18046   | 1.19792    | 1.92613   | 0.785942   |
| 1 | Grap       | 0 | -0.104759  | -0.295399  | -0.346538  | 0.161064   | 2.82833   | 1.86455  | 1.36139   | 0.290617   | 0.485303  | 0.704518   |
| 1 | Grid2ip    | 0 | -0.75322   | -1.2646    | -0.260123  | -0.471797  | 0.423337  | -1.65083 | -2.48163  | -1.49753   | -2.34987  | -2.24366   |
| 1 | Grm2       | 0 | -0.893012  | -1.65064   | -2.09573   | -1.59073   | -1.05073  | -3.31583 | -3.01164  | -2.80609   | -2.47617  | -1.61865   |
| 1 | Grn        | 0 | -0.0818044 | -0.117591  | -0.178586  | 0.262511   | 2.08945   | 2.48829  | 1.97739   | 0.646278   | 0.629434  | -0.0063153 |
| 1 | Gsdmd      | 0 | -0.45397   | -0.523923  | 0.107782   | 0.709027   | 2.08552   | 2.10096  | 2.15069   | 1.0359     | 1.03362   | 0.275829   |
| 1 | Gsg2       | 0 | -0.992896  | -0.395058  | -0.997476  | 0.115859   | 2.03893   | 1.78301  | 0.946131  | -0.137846  | -0.225764 | 0.27964    |
| 1 | Gsn        | 0 | -0.0109516 | 0.125767   | 0.206848   | 0.905765   | 2.50387   | 2.73463  | 2.009     | 1.14166    | 1.09818   | 0.488953   |
| 1 | Gstt3      | 0 | 0.854322   | -0.0447158 | 0.199148   | 0.0403723  | 2.45832   | 1.04845  | 1.82746   | 1.65434    | 2.51143   | 2.00981    |
| 1 | Gtse1      | 0 | -0.387347  | 0.203216   | 0.449531   | 2.39778    | 2.48891   | 1.93377  | 1.16419   | 0.367787   | 0.694896  | 0.103908   |
| 1 | Gusb       | 0 | -0.129463  | -0.11935   | -0.0777394 | 0.567834   | 2.1619    | 2.52826  | 1.98007   | 0.76117    | 1.06345   | 0.0778797  |
| 1 | H19        | 0 | -0.512185  | -0.234194  | 0.138794   | 1.36655    | 2.20605   | 1.97457  | 1.8347    | 0.0760952  | 0.682016  | -0.223415  |
| 1 | H2-Aa      | 0 | -0.472405  | -0.503738  | -0.447569  | -0.0448597 | 1.86584   | 0.641581 | 2.0165    | 1.46726    | 1.76622   | 0.408833   |
| 1 | H2-DMa     | 0 | 0.760235   | -0.301633  | -0.746224  | 0.0823099  | 2.47332   | 1.23887  | 2.26654   | 1.07607    | 0.57847   | 0.68501    |
| 1 | H2-DMb1    | 0 | 0.0965809  | -0.398491  | -0.620953  | 0.344939   | 2.06107   | 1.70959  | 2.20065   | 1.00433    | 1.58897   | 0.380528   |
| 1 | H2-Q4      | 0 | 0.426343   | 0.804234   | 0.98656    | 1.11008    | 3.07277   | 1.82463  | 2.81537   | 1.05059    | 1.43777   | 0.112286   |
| 1 | H2-Q7      | 0 | 0.12764    | -1.07915   | -0.0785675 | -0.703298  | 2.32958   | 0.801718 | 1.74266   | 0.9319     | 0.686457  | 0.863891   |
| 1 | H2-T24     | 0 | -0.0681252 | -0.544242  | -0.410601  | -0.0556997 | 1.53462   | 2.03528  | 2.27913   | 0.709854   | 1.01615   | -0.106241  |
| 1 | H6pd       | 0 | -0.696324  | -0.287737  | 0.0772824  | 1.17242    | 2.2113    | 1.76094  | 1.90048   | 0.03559    | 0.251536  | -0.108921  |
| 1 | Hacd4      | 0 | -0.382826  | -0.479801  | -0.628658  | -0.180134  | 1.821     | 1.83418  | 1.94787   | 1.0571     | 1.13178   | 0.336976   |
| 1 | Hadh       | 0 | -0.292875  | 0.153742   | 0.371123   | 0.358289   | 2.97394   | 2.09197  | 1.80824   | 1.00381    | 1.12984   | 0.698136   |
| 1 | Haus4      | 0 | 0.128453   | -0.265664  | -0.265815  | 0.219179   | 2.37524   | 2.03959  | 1.72501   | 0.783687   | 0.957709  | -0.475873  |
| 1 | Havcr2     | 0 | 0.307535   | 0.629308   | 0.606957   | 0.495879   | 2.5185    | 2.81042  | 2.44262   | 1.22487    | 0.811844  | 0.396187   |
| 1 | Hba-a1     | 0 | -1.77072   | -1.39059   | -3.67481   | -0.781599  | -0.337602 | -1.75046 | -0.430558 | -1.78262   | -1.28419  | -1.57217   |
| 1 | Hck        | 0 | -0.171301  | -0.246457  | 0.395858   | 1.21149    | 2.1491    | 2.21012  | 2.49038   | 0.896932   | 1.06892   | 0.159315   |
| 1 | Hcls1      | 0 | -0.13787   | 0.248284   | 0.468675   | 1.3941     | 2.35245   | 2.31487  | 2.48249   | 1.22081    | 1.19355   | 0.0552915  |
| 1 | Hells      | 0 | 0.117345   | 0.342253   | 0.531481   | 0.939343   | 2.98741   | 1.73881  | 0.941217  | -0.0270447 | 0.4137    | -0.71185   |
| 1 | Helz2      | 0 | -0.323923  | -0.140476  | 0.679799   | 0.379037   | 1.33478   | 1.66962  | 2.4204    | -0.516638  | 0.248666  | -0.840135  |
| 1 | Hexa       | 0 | 0.0920999  | 0.062769   | -0.114842  | -0.102621  | 1.91958   | 2.40629  | 2.3402    | 0.971022   | 0.976855  | 0.169192   |
| 1 | Hexb       | 0 | -0.0863086 | -0.0663097 | -0.0826605 | 0.32173    | 2.12575   | 2.45007  | 2.2266    | 1.14722    | 0.802726  | 0.359066   |
| 1 | Hhex       | 0 | 0.0587388  | -0.184609  | 0.727821   | 0.564733   | 2.68236   | 2.41659  | 2.18543   | 1.43077    | 1.30697   | 1.38918    |
| 1 | Hist1h1c   | 0 | 1.08634    | 0.741948   | -0.195112  | 1.0761     | 2.35999   | 2.51481  | 2.65566   | 1.43018    | 1.45319   | 0.167528   |
| 1 | Hist1h2ao  | 0 | -0.629923  | -0.809369  | -1.52204   | -0.258833  | 2.11937   | 1.31072  | 0.364458  | -0.411127  | -0.199539 | 0.117194   |
| 1 | Hist2h2aa1 | 0 | -0.242161  | -1.05574   | -1.41768   | -0.348121  | 1.95736   | 1.11299  | 0.820129  | 0.491258   | 1.01231   | 0.736088   |
| 1 | Hist2h2be  | 0 | -1.30926   | -2.78368   | -2.63738   | -1.60279   | 0.0905367 | -1.5734  | -1.92605  | -0.668057  | -0.289662 | -0.592749  |

|   |           |   |            |            |           |           |          |            |           |           |            |            |
|---|-----------|---|------------|------------|-----------|-----------|----------|------------|-----------|-----------|------------|------------|
| 1 | Hist3h2a  | 0 | -0.656724  | -2.78665   | -2.61174  | -0.675708 | -1.20666 | -0.0691805 | -0.211042 | -0.107959 | -0.0378711 | -0.789856  |
| 1 | Hk2       | 0 | -0.438228  | -0.115983  | 0.318499  | 1.0589    | 2.14209  | 2.16703    | 2.33417   | 1.09163   | 0.90208    | 0.0179666  |
| 1 | Hk3       | 0 | 0.170177   | 0.356169   | 0.744302  | 1.33215   | 2.74404  | 2.53317    | 2.50701   | 1.31455   | 1.71171    | 0.517228   |
| 1 | Hlx       | 0 | 0.529004   | -0.165925  | 0.931797  | 1.13097   | 2.39647  | 2.43498    | 2.66831   | 1.78737   | 1.61557    | 0.446963   |
| 1 | Hmga2-ps1 | 0 | -0.552401  | -0.511448  | 0.0768031 | 0.305017  | 2.10759  | 2.03703    | 1.8244    | 0.764301  | 0.448335   | -0.319158  |
| 1 | Hmgb2     | 0 | 1.28967    | 1.22775    | 1.09433   | 1.29768   | 3.70631  | 2.04587    | 1.54941   | 0.76123   | 0.586296   | 0.263341   |
| 1 | Hmha1     | 0 | -0.119446  | -0.270376  | -0.140806 | 0.186164  | 2.0165   | 2.27694    | 2.22365   | 1.13203   | 1.03094    | 0.291956   |
| 1 | Hmmr      | 0 | -0.168616  | -0.396553  | -0.377051 | 0.145499  | 2.50087  | 1.55306    | 0.450075  | -0.295378 | -0.128865  | -1.06154   |
| 1 | Hn1l      | 0 | -0.157908  | 0.648518   | 0.336046  | 2.19003   | 2.58942  | 2.5145     | 1.90876   | 1.15453   | 1.33138    | 0.486635   |
| 1 | Hpgd      | 0 | 0.0132693  | -0.270932  | -0.386842 | 0.718194  | 2.13766  | 2.31454    | 1.98973   | 1.36313   | 1.03993    | 0.236914   |
| 1 | Hpgds     | 0 | 0.122359   | 0.249663   | -0.141839 | 0.648923  | 2.46238  | 2.38559    | 2.27478   | 1.09661   | 1.04779    | 0.239146   |
| 1 | Hrsp12    | 0 | 0.411482   | 0.410831   | 0.672416  | 0.098203  | 2.81358  | 1.53125    | 1.80698   | 2.28733   | 2.36522    | 1.72843    |
| 1 | Hscb      | 0 | 0.121329   | 0.462964   | 0.394424  | 0.470466  | 3.06952  | 2.06223    | 2.04265   | 1.48587   | 1.77161    | 0.598119   |
| 1 | Hsd3b7    | 0 | 0.128583   | 0.671342   | 1.06791   | 1.64649   | 3.14004  | 2.21085    | 1.75395   | 1.27166   | 0.686066   | -0.0637218 |
| 1 | Hspa12b   | 0 | -0.995614  | -0.798973  | 0.370348  | 2.33072   | 1.74918  | 1.29264    | 0.959273  | 0.97073   | 0.517139   | 0.455946   |
| 1 | Hspb6     | 0 | 0.0916315  | 0.271314   | 0.528733  | 2.16056   | 3.11587  | 2.10593    | 1.68865   | 0.746436  | 0.772996   | 1.21858    |
| 1 | Htr2b     | 0 | 0.510171   | 0.301127   | 0.523931  | 1.19842   | 2.45864  | 2.64428    | 1.99422   | 1.29129   | 1.52081    | -0.389484  |
| 1 | Htra3     | 0 | -0.503236  | -0.577707  | -1.09089  | 0.334604  | 1.67486  | 2.09819    | 1.48703   | 0.365645  | 0.798378   | 0.292674   |
| 1 | Hyi       | 0 | 0.36168    | 0.203201   | 0.870004  | 1.79904   | 3.60925  | 1.36625    | 1.21283   | 0.522634  | 0.650388   | 1.05973    |
| 1 | Id3       | 0 | -0.727836  | -0.697537  | 0.0172649 | 0.910845  | 2.07954  | 1.86174    | 1.74889   | 1.19214   | 1.38349    | 0.846181   |
| 1 | Ier5l     | 0 | -0.411928  | -1.78852   | -2.32087  | -0.810316 | 0.599315 | -1.77639   | -2.29323  | -1.81646  | -1.06697   | -0.103261  |
| 1 | Ifi205    | 0 | 0.0212196  | -0.0219379 | 0.569948  | 1.4593    | 2.29037  | 1.49744    | 2.39963   | 1.16016   | 1.91154    | -0.369049  |
| 1 | Ifi27     | 0 | 0.472401   | 0.300061   | 0.574037  | 1.07765   | 3.37026  | 2.13342    | 2.28302   | 1.05477   | 1.26708    | 0.991127   |
| 1 | Ifi27l2a  | 0 | 0.154091   | -0.0124268 | 0.490809  | 1.05148   | 2.67696  | 2.29537    | 2.51243   | 1.07847   | 1.45884    | 0.601683   |
| 1 | Ifi30     | 0 | 0.41776    | 0.543516   | 0.843837  | 1.41338   | 3.20732  | 2.48264    | 2.4207    | 1.53147   | 1.56873    | 0.683392   |
| 1 | Ifi35     | 0 | -0.300389  | 0.362829   | 0.58889   | 1.45442   | 2.62778  | 2.059      | 2.4425    | 0.917962  | 1.0438     | 0.17567    |
| 1 | Ifi44     | 0 | -0.126384  | -0.401915  | 0.248692  | 0.823443  | 1.90498  | 2.17614    | 2.25304   | 0.677462  | 1.07194    | -0.411917  |
| 1 | Ifitm1    | 0 | -1.11876   | 0.0917502  | 0.106953  | 1.56739   | 2.60716  | 1.27645    | 1.53276   | 0.815116  | 0.873109   | 0.481584   |
| 1 | Ifitm2    | 0 | 0.210398   | 0.528622   | 0.85607   | 1.81408   | 3.17993  | 2.12005    | 2.14411   | 1.24603   | 1.82654    | 0.368818   |
| 1 | Ifitm3    | 0 | -0.0377769 | 0.178866   | 0.938262  | 1.86034   | 2.70466  | 2.16322    | 2.3878    | 0.817628  | 1.51974    | 0.402576   |
| 1 | Ifnar2    | 0 | 0.0162619  | 0.267438   | 0.582143  | 0.791094  | 2.98234  | 2.20793    | 2.38672   | 1.17058   | 1.36927    | 0.822043   |
| 1 | Igfbp2    | 0 | 0.389997   | 0.314946   | 0.2802    | 0.843733  | 3.46414  | 2.04403    | 1.66409   | 0.806682  | 1.11122    | 0.862599   |
| 1 | Igfbp7    | 0 | 0.40554    | 0.692753   | 1.20418   | 2.21945   | 3.34554  | 2.26678    | 1.44465   | 0.68475   | 0.948677   | 0.476067   |
| 1 | Igfbpl1   | 0 | 1.24083    | -0.335853  | 0.823968  | 2.23556   | 2.85309  | 1.94609    | 2.28911   | 2.03951   | 2.06875    | 1.28173    |
| 1 | Igsf8     | 0 | -0.852621  | -2.43613   | -3.44227  | -0.902281 | -0.99254 | -0.764658  | -0.506019 | -1.10429  | -0.574674  | -0.280961  |
| 1 | Ikzf1     | 0 | -0.248868  | -0.226805  | -0.269347 | 0.927729  | 1.91354  | 2.26645    | 2.36949   | 1.08501   | 0.731205   | 0.467908   |
| 1 | Il15      | 0 | -0.348693  | 0.24217    | -0.431814 | 0.174953  | 2.59563  | 1.57991    | 2.08362   | 1.2217    | 0.989959   | 0.435076   |
| 1 | Il21r     | 0 | -0.134796  | -0.197407  | -0.47852  | -0.275291 | 2.46166  | 1.5625     | 1.93091   | 0.309341  | 0.0341921  | 0.699161   |



|   |         |   |            |            |            |            |           |           |          |           |           |            |
|---|---------|---|------------|------------|------------|------------|-----------|-----------|----------|-----------|-----------|------------|
| 1 | Inf2    | 0 | -0.792604  | -2.06615   | -2.28881   | -2.615     | -0.449988 | -1.7637   | -1.47078 | -2.43523  | -3.33909  | -2.09624   |
| 1 | Inpp5d  | 0 | -0.0881026 | -0.209805  | -0.222722  | 0.342198   | 1.75846   | 2.25658   | 2.35987  | 0.768979  | 0.551972  | -0.176549  |
| 1 | Inpp1   | 0 | -0.330496  | -0.848369  | -0.365599  | 1.03943    | 1.62163   | 2.06755   | 1.45655  | 0.261065  | 0.0309091 | -0.700254  |
| 1 | Iqca    | 0 | 0.213153   | 0.995978   | -0.367081  | 0.0470867  | 2.53634   | 1.42858   | 1.80858  | 1.62585   | 2.2064    | 1.85064    |
| 1 | Iqgap3  | 0 | 0.632226   | 0.7556     | 0.811508   | 0.558487   | 2.94059   | 2.91493   | 2.17662  | 1.5818    | 0.956628  | 0.573109   |
| 1 | Irak4   | 0 | 0.242481   | -0.0373966 | 0.372343   | 1.46548    | 2.57567   | 2.22039   | 2.46988  | 1.27064   | 1.01767   | 0.228549   |
| 1 | Irf5    | 0 | 0.0151859  | 0.151803   | 0.425307   | 0.810168   | 2.23996   | 2.06694   | 2.29813  | 0.994864  | 1.24022   | -0.644484  |
| 1 | Irx2    | 0 | 2.0073     | -0.474545  | 1.82279    | 1.43872    | 2.28902   | 2.16707   | 0.890904 | 1.53526   | 2.90239   | 1.13103    |
| 1 | Isg15   | 0 | -0.313746  | -0.612149  | -0.116119  | 0.540744   | 1.81689   | 1.19508   | 1.59955  | -0.878432 | -0.200853 | -1.19481   |
| 1 | Islr    | 0 | -0.485037  | -1.04059   | -1.0058    | -0.0465676 | 1.80278   | 1.46342   | 1.43897  | 0.579095  | 1.16786   | 0.296311   |
| 1 | Itgam   | 0 | -0.123344  | -0.151383  | -0.217762  | 0.4539     | 2.40554   | 1.99297   | 2.26313  | 0.937652  | 0.802634  | 0.26261    |
| 1 | Itgb1   | 0 | 0.139165   | 0.654445   | 0.656507   | 1.6539     | 2.80896   | 2.73737   | 2.52893  | 1.20856   | 1.57998   | 0.977174   |
| 1 | Itgb3   | 0 | -0.30735   | 0.203051   | -0.315872  | 0.0172296  | 2.08555   | 2.20064   | 1.89922  | 0.328834  | 0.40764   | -0.36509   |
| 1 | Itgb5   | 0 | 0.0058443  | -0.0480199 | -0.261308  | 0.024813   | 1.87414   | 2.44393   | 2.22237  | 1.13675   | 0.912133  | 0.269052   |
| 1 | Itgb7   | 0 | 0.576375   | 0.204356   | 1.16354    | 1.24334    | 2.87504   | 1.79167   | 3.11175  | 1.47551   | 2.05347   | 0.999422   |
| 1 | Itm2a   | 0 | -0.270058  | -0.500296  | -1.27291   | -0.462877  | 1.62585   | 1.19244   | 1.53854  | 1.09453   | 1.38338   | 0.867479   |
| 1 | Itpr2   | 0 | 0.357796   | 0.462129   | 0.449769   | 0.432036   | 2.3824    | 2.70268   | 2.23826  | 0.793425  | 0.509587  | -0.0455061 |
| 1 | Itpr3   | 0 | 0.0919198  | -0.637571  | -0.0328163 | 1.10326    | 2.02576   | 2.54426   | 1.80161  | 1.01998   | 1.06587   | 1.59053    |
| 1 | Itpr1p  | 0 | 1.60337    | 0.427198   | 0.92076    | 2.07284    | 2.1835    | 1.99526   | 2.20872  | -0.160276 | 0.781205  | -0.393333  |
| 1 | Itpr1p2 | 0 | 0.0116127  | 0.184784   | 0.43162    | 1.3776     | 2.52394   | 2.44802   | 2.47231  | 1.31487   | 1.2218    | 0.419201   |
| 1 | Jak3    | 0 | 0.0832638  | -0.385376  | 0.125613   | 1.17201    | 2.30213   | 1.78901   | 1.54335  | 0.342453  | 0.387393  | -0.994478  |
| 1 | Kank2   | 0 | -1.23377   | -0.773635  | -0.50662   | 0.568153   | 1.74871   | 1.54816   | 1.51433  | 0.52126   | 0.831807  | -0.214167  |
| 1 | Kcnk13  | 0 | -0.0159399 | -0.178605  | -0.953104  | 0.931319   | 2.12644   | 1.84589   | 1.79701  | 0.493161  | 1.09804   | 1.58491    |
| 1 | Kcnk6   | 0 | -0.0719622 | -0.360222  | 0.0499923  | 0.499668   | 2.05064   | 2.16745   | 2.12826  | 0.513189  | 0.149536  | -0.322147  |
| 1 | Kcnn4   | 0 | 0.348525   | -0.128693  | -0.109971  | 0.803598   | 2.70495   | 2.15685   | 2.14255  | 0.964953  | 1.71782   | 1.06375    |
| 1 | Kdelc2  | 0 | 0.531925   | 0.488133   | 0.2142     | 1.70037    | 2.74792   | 2.71469   | 2.23431  | 1.10473   | 2.15147   | 1.65945    |
| 1 | Kif11   | 0 | 0.0460089  | 0.321592   | 0.238112   | 0.155228   | 3.00206   | 2.16367   | 1.0667   | 0.50092   | 0.221567  | -0.064435  |
| 1 | Kif14   | 0 | 0.71511    | 0.991616   | 1.46713    | 1.05549    | 2.97968   | 2.16724   | 1.01563  | 0.100689  | -0.178764 | -0.1305    |
| 1 | Kif15   | 0 | 0.526441   | 0.37954    | 0.301994   | 0.531387   | 2.93121   | 2.43969   | 1.25949  | 0.352459  | 0.565836  | -0.247178  |
| 1 | Kif18a  | 0 | 1.75742    | 1.08939    | 0.952596   | 1.85012    | 3.53048   | 2.97661   | 2.15142  | 1.29364   | 1.34063   | 0.8328     |
| 1 | Kif20a  | 0 | -0.67328   | -0.0953886 | -0.0006968 | -0.336548  | 2.48696   | 1.94921   | 1.02323  | 0.378323  | 0.0953575 | -0.309711  |
| 1 | Kif20b  | 0 | -0.172841  | 0.172142   | 0.399745   | 0.569053   | 3.08755   | 2.08049   | 1.21069  | 0.42795   | 0.597374  | 0.0254867  |
| 1 | Kif22   | 0 | -0.382659  | 0.160537   | 0.238651   | 0.910987   | 2.99488   | 2.00794   | 1.19848  | 0.445277  | 0.0401713 | 0.427634   |
| 1 | Kif23   | 0 | 0.763776   | 0.799045   | 0.818688   | -0.108501  | 2.72809   | 2.13667   | 0.446843 | -0.230407 | -0.148806 | -0.330997  |
| 1 | Kif2c   | 0 | 0.306396   | 0.602      | 0.053972   | 0.741415   | 2.87981   | 2.39018   | 1.67653  | 0.988391  | 0.739514  | -0.212427  |
| 1 | Kif4    | 0 | 0.822808   | 1.0673     | 1.28913    | 0.811516   | 3.36984   | 2.6342    | 1.47364  | 1.01194   | 0.358436  | 0.388992   |
| 1 | Klf4    | 0 | 1.94405    | -0.645383  | -0.474402  | 1.09613    | 0.728602  | -0.909345 | -1.22886 | -1.1364   | -0.22104  | 0.430352   |
| 1 | Klk6    | 0 | 0.270686   | 0.0991866  | 0.342535   | 1.88203    | 3.06259   | 2.01995   | 1.99571  | 1.15416   | 0.986439  | 0.465955   |

|   |         |   |            |            |            |            |            |           |           |           |           |            |
|---|---------|---|------------|------------|------------|------------|------------|-----------|-----------|-----------|-----------|------------|
| 1 | Klk8    | 0 | -0.0768116 | -0.0510869 | -0.538426  | 0.645004   | 3.14731    | 0.960338  | 0.673513  | 0.231262  | -0.297649 | 0.202154   |
| 1 | Knstrn  | 0 | -0.131534  | -0.0998183 | -0.0368382 | -0.382744  | 2.49765    | 1.7757    | 0.475001  | -0.432179 | -0.219562 | -0.785123  |
| 1 | Kntc1   | 0 | -0.412366  | 0.0328086  | -0.844797  | 0.217177   | 2.50794    | 2.04222   | 0.983054  | 0.674229  | 0.266812  | 0.207945   |
| 1 | Krcc1   | 0 | -0.183425  | -0.364562  | 0.266262   | 0.986602   | 3.08754    | 1.76125   | 1.38873   | 0.649264  | 1.17061   | 0.525932   |
| 1 | Krtcap2 | 0 | 0.248938   | 0.498772   | 0.566039   | 1.94517    | 3.29796    | 0.763434  | 0.519191  | 0.08446   | 0.31692   | 0.0534373  |
| 1 | Lair1   | 0 | -0.0224719 | 0.0871715  | 0.431111   | 0.537384   | 2.13679    | 2.63022   | 2.43504   | 1.09082   | 0.951821  | 0.234894   |
| 1 | Laptm5  | 0 | 0.0242321  | 0.0501756  | 0.0067341  | 0.30461    | 2.09953    | 2.3555    | 2.44015   | 1.21385   | 1.10551   | 0.20786    |
| 1 | Lat2    | 0 | 0.0352786  | -0.283275  | 0.224417   | 1.05704    | 2.67743    | 2.04805   | 2.09692   | 1.1293    | 1.43306   | 0.288756   |
| 1 | Layn    | 0 | -0.374072  | -0.0082311 | 0.335632   | 2.29519    | 2.25856    | 2.00443   | 1.99222   | 1.28471   | 1.3348    | 0.507883   |
| 1 | Lcp1    | 0 | 0.143495   | 0.389363   | 0.334684   | 1.4343     | 2.40889    | 2.53897   | 2.47844   | 1.35939   | 1.76855   | 0.336463   |
| 1 | Lcp2    | 0 | -0.346852  | 0.294282   | 0.495857   | 1.48504    | 2.28894    | 2.45567   | 2.27643   | 0.989494  | 1.0519    | 0.112831   |
| 1 | Ldlrap1 | 0 | -0.0841627 | 0.112128   | -0.0873562 | 1.21822    | 2.60114    | 2.25526   | 1.81202   | 0.519978  | 1.10713   | 0.0100091  |
| 1 | Leprot  | 0 | -0.755551  | -0.710848  | -0.587637  | 0.067748   | 1.31033    | 1.91841   | 2.10792   | 0.492256  | 0.302871  | 0.0545493  |
| 1 | Lgals1  | 0 | -0.05622   | 0.0646138  | 0.151845   | 0.880119   | 3.14736    | 2.11075   | 1.38536   | 0.794354  | 1.08242   | 0.429049   |
| 1 | Lgals9  | 0 | -0.150022  | -0.218723  | -0.036134  | 0.79709    | 2.38004    | 2.24584   | 2.12279   | 0.801815  | 0.856525  | 0.180711   |
| 1 | Lgmn    | 0 | 0.232112   | 0.220099   | 0.345948   | 0.705118   | 2.78206    | 2.55456   | 2.07916   | 0.849165  | 0.803634  | 0.314271   |
| 1 | Lgr6    | 0 | 0.358186   | -1.41997   | -0.331023  | 0.380981   | -0.0347979 | -1.5079   | -2.11858  | -1.46768  | -1.97003  | -2.04348   |
| 1 | Lhfp15  | 0 | 0.44179    | 0.204412   | -0.382776  | 0.515529   | 2.57223    | -0.272672 | -0.496285 | 0.819543  | 1.99324   | 1.40417    |
| 1 | Limd1   | 0 | -0.310208  | 0.526204   | 0.449477   | 0.91545    | 3.36492    | 1.76778   | 1.4763    | 0.460582  | 1.08104   | 0.740701   |
| 1 | Lin7b   | 0 | -0.512717  | -2.0197    | -2.73778   | -1.86481   | -0.655556  | -2.66254  | -2.90517  | -1.70864  | -2.2843   | -0.860715  |
| 1 | Lipa    | 0 | 0.108675   | -0.173532  | 0.107851   | 0.452087   | 2.09911    | 2.32439   | 2.22699   | 0.70677   | 1.53059   | -0.0759917 |
| 1 | Liph    | 0 | 0.213452   | 0.661172   | 1.30831    | 0.982024   | 2.79282    | 1.63709   | 1.55163   | 0.883682  | 0.0963583 | -0.926442  |
| 1 | Lmnb1   | 0 | -0.298847  | -0.135329  | -0.0510618 | 0.678405   | 3.12003    | 1.56292   | 1.13118   | 0.425265  | 0.545589  | 0.0653578  |
| 1 | Loxl1   | 0 | -0.400563  | -0.23811   | -0.387041  | 1.05423    | 1.60986    | 2.71176   | 1.69877   | 0.408996  | 0.314553  | 0.786947   |
| 1 | Loxl3   | 0 | -0.766509  | -1.06525   | -0.350659  | 0.0905898  | 1.39652    | 1.7857    | 1.74082   | 0.821615  | 1.15451   | -0.0744325 |
| 1 | Lpar5   | 0 | 0.0403418  | -1.13473   | 0.283292   | 0.106943   | 1.64015    | 1.68135   | 2.16631   | 0.672088  | 0.278669  | -0.560108  |
| 1 | Lpcat2  | 0 | -0.12205   | -0.0760232 | -0.472335  | 0.0071073  | 1.87752    | 2.01185   | 2.44119   | 1.1371    | 0.985098  | 0.602539   |
| 1 | Lpcat3  | 0 | 0.28892    | -0.243471  | -0.161148  | 0.850753   | 2.59164    | 2.16209   | 2.0025    | 0.413858  | 0.695775  | 0.157742   |
| 1 | Lpxn    | 0 | 0.0885021  | 0.240266   | 0.233472   | 1.2167     | 2.65452    | 2.44886   | 2.39269   | 1.40049   | 1.75516   | 1.02965    |
| 1 | Lrp10   | 0 | 0.0690728  | -0.534861  | -0.60009   | 0.893156   | 2.3073     | 1.68141   | 1.55985   | 0.50287   | 0.563579  | -0.660348  |
| 1 | Lrp5    | 0 | 0.515475   | 0.793779   | 0.528249   | 1.42578    | 2.69084    | 2.77548   | 2.6135    | 1.30191   | 1.03278   | 0.337689   |
| 1 | Lrrc17  | 0 | -0.657836  | -0.582016  | -0.707312  | -0.549318  | 0.768794   | -1.64782  | -2.95022  | -1.53662  | -1.43255  | -1.77012   |
| 1 | Lrrc25  | 0 | -0.160837  | -0.691061  | 0.316133   | 1.17306    | 2.08939    | 1.94139   | 2.20758   | 0.79127   | 1.08059   | -0.103915  |
| 1 | Lrrc39  | 0 | 0.76653    | 0.797115   | -0.56142   | -0.0744995 | 1.87833    | 2.3007    | 1.96276   | 0.941951  | -0.205655 | -0.239533  |
| 1 | Lrrc4b  | 0 | -1.10458   | -2.78675   | -3.3944    | -1.50421   | -0.581704  | -1.59992  | -1.66551  | -1.43333  | -1.11983  | -0.312586  |
| 1 | Lrriq1  | 0 | 0.180495   | 0.276044   | -0.220062  | 0.0208969  | 2.87654    | 1.16806   | 1.37422   | 0.95345   | 2.31029   | 1.1525     |
| 1 | Lrrk1   | 0 | -0.782368  | -0.941995  | -0.734614  | 0.186902   | 1.64598    | 1.61946   | 1.80473   | 0.786477  | 0.633057  | 0.095869   |
| 1 | Lsr     | 0 | 1.37705    | 0.688427   | 1.21173    | 2.23041    | 3.86881    | 2.22181   | 1.47094   | 0.988635  | 1.82557   | 1.79029    |

|   |          |   |            |            |           |            |          |           |           |            |            |            |
|---|----------|---|------------|------------|-----------|------------|----------|-----------|-----------|------------|------------|------------|
| 1 | Lst1     | 0 | 0.274608   | -0.475055  | -0.504637 | -0.236686  | 2.82859  | 1.2232    | 1.45245   | 1.0203     | 0.801221   | 1.07596    |
| 1 | Ltbp1    | 0 | 0.585985   | 0.568975   | 1.32395   | 1.58359    | 2.76573  | 2.44219   | 3.00042   | 0.959391   | 1.16152    | 0.444797   |
| 1 | Ltbr     | 0 | 0.133782   | 0.560577   | 0.888979  | 2.23552    | 3.10419  | 2.15022   | 2.11755   | 1.03004    | 1.21231    | 0.497165   |
| 1 | Ltc4s    | 0 | -0.158627  | -1.23346   | -0.987262 | -0.447223  | 2.11603  | 1.26291   | 1.13172   | 0.0007511  | 0.400463   | 0.677429   |
| 1 | Ly6e     | 0 | -0.393477  | -1.23098   | -1.38942  | -0.618225  | 0.732747 | 1.23352   | 1.95346   | -0.0153407 | 0.204279   | -0.320809  |
| 1 | Ly86     | 0 | 0.0795635  | -0.0432035 | 0.124783  | 1.05976    | 2.53712  | 2.24761   | 2.49354   | 1.46585    | 1.26719    | 1.02681    |
| 1 | Ly96     | 0 | -0.0322794 | 1.11553    | 0.815657  | 1.37951    | 3.16928  | 2.21146   | 2.35222   | 0.69556    | 1.89271    | 0.957472   |
| 1 | Lyl1     | 0 | -0.83526   | -0.396931  | -0.14025  | -0.0531218 | 2.25579  | 1.89338   | 1.43868   | 0.858163   | 0.500737   | -0.143739  |
| 1 | Lyn      | 0 | 0.252903   | 0.409004   | 0.513596  | 1.37602    | 2.34917  | 2.66822   | 2.75221   | 1.45624    | 1.30946    | 0.437441   |
| 1 | Maf      | 0 | -0.0134802 | 0.0635497  | -0.295201 | -0.200589  | 2.23504  | 2.30804   | 2.03987   | 0.84916    | 1.08074    | 0.743216   |
| 1 | Mafb     | 0 | 0.312175   | 0.356988   | 0.254973  | 0.531849   | 2.55547  | 2.62224   | 2.25059   | 0.815739   | 0.684032   | 0.222585   |
| 1 | Malat1   | 0 | 0.605972   | 0.0133967  | 0.0792587 | -0.0633674 | 1.55707  | -0.528618 | -1.32701  | -1.36022   | -0.978108  | -1.9398    |
| 1 | Maml2    | 0 | 0.311999   | 0.0434367  | 0.682404  | 0.676184   | 3.28482  | 1.74938   | 1.74704   | 0.646539   | 0.591188   | 0.0464506  |
| 1 | Mamstr   | 0 | -0.0554554 | -0.650473  | -1.23145  | 0.671183   | 0.254897 | -1.70857  | -1.29337  | -1.86658   | -2.56969   | -0.890275  |
| 1 | Man1c1   | 0 | 0.212082   | 0.201506   | -0.241394 | -0.362288  | 1.19311  | 2.60736   | 2.04505   | 0.286777   | -0.0612866 | -0.285214  |
| 1 | Man2a1   | 0 | -0.512282  | -0.0149998 | 0.343514  | -0.0671909 | 1.8614   | 2.66337   | 1.80537   | 0.742603   | 0.860665   | 0.0992099  |
| 1 | Map1lc3a | 0 | -0.698183  | -1.24972   | -1.87218  | -1.39971   | 0.786284 | -2.10326  | -2.65289  | -1.69227   | -1.85276   | -0.673294  |
| 1 | Map4k1   | 0 | 0.147481   | 0.137254   | 0.575728  | 0.799492   | 3.02142  | 1.54801   | 1.97682   | 0.717869   | 1.03072    | -0.445508  |
| 1 | Mapkapk3 | 0 | -0.059468  | 0.389089   | 0.758721  | 1.6122     | 2.64495  | 2.07069   | 2.62286   | 1.04278    | 1.08784    | 0.143997   |
| 1 | Mastl    | 0 | -0.114804  | -0.0207671 | -0.262057 | 0.107507   | 2.94687  | 1.78355   | 0.787608  | 0.160736   | 0.0455527  | -0.0733857 |
| 1 | Matn4    | 0 | -0.0716573 | -0.683603  | -0.523874 | -0.152318  | 2.07027  | 1.69595   | 1.95659   | 1.06242    | 0.317198   | 0.0684627  |
| 1 | Mc4r     | 0 | -0.441431  | -0.982865  | -1.20111  | 2.47004    | 0.299222 | -1.01162  | -0.134037 | 0.444018   | -0.0982328 | -0.0938047 |
| 1 | Mcm10    | 0 | 0.274217   | 0.461704   | 0.896547  | 1.18963    | 3.24324  | 1.93234   | 1.19522   | 0.03524    | 0.145546   | 0.141581   |
| 1 | Mcm2     | 0 | 0.279535   | -0.291893  | -0.153672 | 1.18845    | 2.92157  | 2.05772   | 1.3353    | 0.253075   | 0.639714   | 0.420178   |
| 1 | Mcm3     | 0 | 0.0270912  | -0.429924  | -0.351557 | 1.20722    | 2.55987  | 2.09386   | 1.60817   | 0.908083   | 0.625753   | 0.252533   |
| 1 | Mcm5     | 0 | -0.598682  | -0.338963  | -0.499229 | 0.774023   | 2.68358  | 1.66492   | 0.761122  | 0.103607   | -0.158181  | 0.295248   |
| 1 | Mcm6     | 0 | -0.528362  | -0.427923  | -0.590931 | 0.895094   | 2.34771  | 2.06795   | 1.3172    | 0.627515   | 0.665256   | 0.322792   |
| 1 | Mcm7     | 0 | -0.0314952 | 0.197856   | 0.0598223 | 1.30183    | 3.12436  | 2.0145    | 1.19854   | 0.596241   | 0.12719    | 0.75223    |
| 1 | Meg3     | 0 | -0.349663  | -0.964572  | -1.02563  | -1.89087   | 0.523331 | -1.54772  | -2.53438  | -1.95632   | -1.67993   | -2.48287   |
| 1 | Meis2    | 0 | 0.179021   | -0.44291   | -0.609432 | -0.556643  | 0.326358 | -1.93798  | -2.00413  | -1.93398   | -2.51478   | -1.37136   |
| 1 | Melk     | 0 | 0.0633175  | -0.923229  | 0.178984  | 0.160439   | 2.60904  | 1.86088   | 0.546861  | 0.169328   | -0.345118  | -0.0771669 |
| 1 | Mettl1   | 0 | -0.322091  | -0.847683  | -0.463986 | 0.525147   | 1.80601  | -1.07091  | -0.968513 | -1.34586   | -1.67749   | -1.26265   |
| 1 | Mfap2    | 0 | -0.104701  | -1.33351   | -1.4984   | -0.0607344 | 1.04192  | 1.69233   | 1.2525    | 0.0215888  | -0.159558  | -0.649121  |
| 1 | Mfng     | 0 | 0.921194   | 0.604287   | 0.0717667 | 1.72704    | 2.42805  | 2.64451   | 2.27767   | 0.711846   | 1.11558    | -0.0766211 |
| 1 | Mgp      | 0 | -0.335166  | 0.291682   | 0.734077  | 0.597592   | 2.75645  | 2.50144   | 1.55342   | 0.954558   | 1.85071    | 0.629291   |
| 1 | Mgst3    | 0 | -0.494271  | -0.945347  | -1.1838   | -1.96028   | 0.442528 | -1.94712  | -2.90639  | -2.03084   | -2.00924   | -1.42255   |
| 1 | Mical1   | 0 | 0.0158061  | 0.0508509  | 0.151941  | 0.411477   | 2.42796  | 2.1025    | 2.48206   | 0.710493   | 1.60054    | 0.563479   |
| 1 | Mical2   | 0 | 0.743059   | 0.908751   | 1.60439   | 2.23795    | 3.57012  | 2.69236   | 2.55877   | 1.85117    | 1.46962    | 1.89029    |

|   |          |   |            |            |            |            |          |            |           |            |            |            |
|---|----------|---|------------|------------|------------|------------|----------|------------|-----------|------------|------------|------------|
| 1 | Mif4gd   | 0 | 0.0405414  | 0.0972602  | 0.0108311  | 0.15726    | 2.94502  | 1.58167    | 1.8808    | 0.914971   | 1.64706    | 0.348153   |
| 1 | Milr1    | 0 | -0.125635  | 0.597069   | 1.10315    | 1.6928     | 2.79519  | 2.4925     | 2.41757   | 1.11401    | 1.34809    | 0.48768    |
| 1 | Mis18bp1 | 0 | -0.115477  | -0.397961  | -0.0241271 | 0.150838   | 2.73945  | 1.93065    | 1.13145   | 0.427721   | -0.0260553 | -0.154239  |
| 1 | Mki67    | 0 | 0.0212796  | 0.255172   | 0.143446   | 0.34987    | 2.63991  | 2.47178    | 1.56489   | 0.69726    | 0.328324   | -0.118143  |
| 1 | Mlph     | 0 | 1.09108    | 1.14744    | -0.252032  | 0.66436    | 2.86343  | 2.58239    | 2.39192   | 1.10517    | 0.948495   | 1.15723    |
| 1 | Mlxipl   | 0 | -0.839183  | -0.482682  | -1.09982   | -0.828339  | 0.945732 | 1.64287    | 1.8027    | 0.292657   | -0.0136195 | -0.55349   |
| 1 | Mmp11    | 0 | -0.757231  | -0.000434  | -0.50167   | 0.341896   | 2.04328  | 2.20204    | 1.39831   | 0.688518   | 1.56529    | 0.526845   |
| 1 | Mmp14    | 0 | 0.0753021  | 0.0136703  | 0.0877863  | 0.776676   | 2.83543  | 1.92648    | 1.98735   | 0.912005   | 1.79847    | 0.330112   |
| 1 | Mms22l   | 0 | -0.717989  | -0.251583  | -0.702434  | -0.0881213 | 1.53934  | 1.94141    | 0.666463  | -0.520073  | -0.616883  | -1.29862   |
| 1 | Mndal    | 0 | 0.261887   | 0.37067    | 0.467524   | 0.843986   | 2.84636  | 1.76222    | 2.58512   | 0.94406    | 2.24043    | 0.711886   |
| 1 | Mns1     | 0 | 0.674073   | 0.200593   | 0.974067   | 0.782099   | 3.46205  | 2.24613    | 1.53384   | 1.76223    | 1.92895    | 0.973436   |
| 1 | Mob3b    | 0 | -0.301324  | -1.59015   | -1.0367    | -0.349245  | 1.22506  | 0.926831   | 1.37543   | 0.906591   | 0.98943    | 1.0215     |
| 1 | Mob3c    | 0 | 0.534482   | 0.58495    | 1.10442    | 1.00471    | 2.94374  | 2.08721    | 1.50624   | -0.648617  | 0.431347   | 0.323169   |
| 1 | Mocos    | 0 | -0.559292  | -0.0432404 | 0.431886   | 1.01452    | 1.55177  | 1.43985    | 1.94767   | 0.820324   | 0.60473    | -1.4672    |
| 1 | Mospd3   | 0 | -0.832003  | -1.84245   | -2.28105   | -0.206157  | 1.42822  | 0.376892   | -0.44343  | -0.678473  | -0.276301  | -0.595212  |
| 1 | Mov10    | 0 | -0.40229   | 0.199961   | -0.0142633 | -1.17384   | 0.132583 | 1.72241    | 1.14051   | -0.855203  | -1.0139    | -1.64532   |
| 1 | Mpzl1    | 0 | -0.313394  | -0.232065  | -0.0106774 | 0.371854   | 1.63988  | 2.85749    | 1.63199   | 0.471146   | 0.793436   | -0.0483909 |
| 1 | Mrap2    | 0 | 0.826321   | 0.130055   | -0.0954599 | 0.350103   | 1.45802  | -0.820657  | 0.0241887 | 0.147686   | 2.01696    | 2.47725    |
| 1 | Mrpl34   | 0 | -0.892654  | -1.36892   | -1.47068   | -0.101295  | 1.69891  | -0.0989594 | -0.524737 | -1.00697   | -1.54103   | -1.77673   |
| 1 | Ms4a4a   | 0 | 0.962735   | 0.510002   | -0.429457  | -0.0171411 | 2.62393  | 1.126      | 2.06572   | -0.0746057 | -0.316036  | 0.105688   |
| 1 | Ms4a6b   | 0 | 0.376382   | 0.156885   | 0.129615   | 1.51596    | 2.52696  | 2.55816    | 2.15124   | 0.723562   | 1.24981    | 0.174374   |
| 1 | Ms4a6c   | 0 | 0.428008   | 0.241305   | 0.328488   | 1.19235    | 2.75965  | 2.16797    | 2.24057   | 0.666733   | 1.30639    | -0.186066  |
| 1 | Ms4a6d   | 0 | 0.491894   | 0.975411   | 1.14974    | 2.13761    | 3.15261  | 2.61318    | 2.53311   | 1.57773    | 1.99451    | 0.664591   |
| 1 | Ms4a7    | 0 | 0.0870123  | -0.497125  | -0.193048  | 0.180425   | 1.94263  | 1.95208    | 2.03624   | 1.39584    | 1.78828    | 0.245107   |
| 1 | Msrb1    | 0 | 0.174022   | -0.655284  | 0.30529    | 0.497835   | 3.0714   | 1.49497    | 1.09934   | 0.428478   | 0.496649   | -0.167591  |
| 1 | Mthfs    | 0 | 2.83573    | 2.51555    | 0.638779   | 2.36152    | 3.16254  | 2.93487    | 2.12037   | 2.23115    | 1.51496    | 2.79757    |
| 1 | Mthfs1   | 0 | -0.692921  | -0.341299  | -0.443762  | -0.382183  | 1.95447  | 1.41823    | 1.83053   | 0.0492776  | 0.841217   | -0.604485  |
| 1 | Mustn1   | 0 | 0.664004   | 0.773956   | 1.30345    | 2.04837    | 3.72475  | 2.13178    | 1.92217   | 1.50866    | 2.31219    | 1.18048    |
| 1 | Mvb12a   | 0 | -0.199259  | -1.91403   | -0.916026  | -0.562487  | 1.94553  | 0.976788   | 0.612535  | -0.105486  | -0.144622  | 0.0378264  |
| 1 | Mybl2    | 0 | 0.0594035  | 0.0425674  | -0.0217956 | 1.25118    | 2.21121  | 2.53492    | 0.234539  | -0.384326  | -0.223917  | 0.216357   |
| 1 | Myh9     | 0 | 1.24433    | 1.17576    | 1.32707    | 1.96609    | 3.30112  | 3.08266    | 2.69035   | 1.31059    | 1.43989    | 0.832771   |
| 1 | Myl12a   | 0 | 1.23159    | 0.662278   | 1.3611     | 1.8588     | 3.2504   | 2.70284    | 2.00996   | 0.901726   | 1.72816    | 0.204277   |
| 1 | Myo18b   | 0 | 0.145581   | -0.624928  | 0.0083308  | 1.51805    | 2.71174  | 2.03197    | 1.21144   | 0.706133   | 0.383442   | 0.299972   |
| 1 | Myo1f    | 0 | -0.481599  | -0.696927  | -0.365418  | 0.594143   | 1.79919  | 1.90988    | 2.02671   | 1.06745    | 1.11354    | 0.143739   |
| 1 | Naalad2  | 0 | 1.06395    | 0.721325   | -0.524394  | 0.24288    | 2.05024  | 2.51736    | 2.51768   | 1.55553    | 1.51171    | 1.29977    |
| 1 | Naga     | 0 | 0.11027    | -0.483526  | -0.543815  | -0.0144807 | 1.30227  | 2.21975    | 2.12782   | 0.900422   | 0.451684   | -0.429886  |
| 1 | Naglu    | 0 | -0.0467495 | -0.10078   | -0.212329  | 0.359096   | 1.96424  | 2.47585    | 2.337     | 1.04893    | 0.910207   | 0.603923   |
| 1 | Nagpa    | 0 | -0.203359  | -0.444313  | -0.327966  | 0.177326   | 2.40069  | 2.13089    | 1.62684   | 0.504063   | 0.213465   | 0.3389     |

|   |           |   |           |           |            |           |         |          |           |            |            |            |
|---|-----------|---|-----------|-----------|------------|-----------|---------|----------|-----------|------------|------------|------------|
| 1 | Ncapg     | 0 | 0.413442  | 0.0730885 | 0.448341   | 0.848227  | 2.91966 | 2.33429  | 1.70406   | 0.788605   | 0.837227   | -0.226502  |
| 1 | Ncapg2    | 0 | 0.803058  | 0.692152  | 1.03558    | 0.598722  | 3.16276 | 2.88247  | 2.26885   | 1.25537    | 0.884275   | 1.0648     |
| 1 | Ncaph     | 0 | -0.266559 | 0.188453  | -0.306178  | 0.258996  | 2.54986 | 2.05605  | 1.28642   | 0.509129   | 0.139754   | -0.500734  |
| 1 | Ncf1      | 0 | 0.188256  | -0.107604 | 0.0340664  | 0.50164   | 2.32359 | 2.39989  | 2.25976   | 0.905474   | 0.772797   | 0.0980369  |
| 1 | Ncf2      | 0 | 0.0415216 | 0.109784  | 0.663543   | 0.79664   | 2.37548 | 2.3137   | 2.57272   | 1.35526    | 1.49986    | 0.142146   |
| 1 | Ncf4      | 0 | 0.186575  | 0.361299  | 0.754701   | 1.66548   | 2.79607 | 2.41207  | 2.6467    | 1.68527    | 1.91921    | 1.04812    |
| 1 | ND3       | 0 | 0.0412848 | 0.525662  | 0.0323156  | -0.691499 | 1.63294 | -1.28563 | -2.22995  | -0.80118   | -0.720434  | -0.466372  |
| 1 | Ndc80     | 0 | 0.0530018 | 0.20774   | 0.736183   | 0.627918  | 2.96576 | 2.26992  | 1.3461    | 0.315011   | 0.426716   | -0.145294  |
| 1 | Necap2    | 0 | 0.166167  | 0.179318  | 0.841592   | 1.26729   | 2.88092 | 2.56597  | 2.14181   | 0.997497   | 0.927094   | 0.369169   |
| 1 | Nek2      | 0 | -0.796015 | -0.166011 | -0.406221  | -0.412083 | 2.4013  | 1.81251  | 0.40348   | -0.0691585 | -0.514829  | 0.0513769  |
| 1 | Nek6      | 0 | -0.367292 | 0.564136  | 0.386427   | 1.7113    | 2.43309 | 1.84964  | 1.88655   | 0.595816   | 0.460916   | -0.555285  |
| 1 | Nes       | 0 | 0.653346  | 0.127879  | 1.03586    | 2.32649   | 3.21227 | 1.53756  | 0.799945  | 0.438768   | 0.488899   | 0.251333   |
| 1 | Neurl3    | 0 | 0.319657  | -0.105038 | 0.130998   | 0.49185   | 2.16094 | 2.20918  | 2.52794   | 1.10783    | 1.47679    | 0.0208772  |
| 1 | Nfam1     | 0 | -0.394582 | -0.189469 | 0.493219   | 1.01447   | 2.33796 | 2.14182  | 2.37533   | 1.04828    | 0.92884    | 0.315237   |
| 1 | Nfkbie    | 0 | -0.460557 | 0.0659158 | 0.235934   | 0.474356  | 2.16326 | 1.44271  | 2.18032   | 0.433405   | 0.50152    | -0.954736  |
| 1 | Ngfr      | 0 | -0.887871 | 0.585496  | 0.133493   | 1.9254    | 2.64044 | 1.18614  | 1.27488   | 0.706641   | 0.922765   | 1.89358    |
| 1 | Ninj1     | 0 | 0.553848  | 0.690805  | 0.806445   | 1.61558   | 3.00289 | 2.28462  | 2.55986   | 0.555717   | 1.19734    | 0.264849   |
| 1 | Nipsnap3b | 0 | 0.260525  | -0.175878 | 0.0203375  | 1.88942   | 2.15906 | 2.36225  | 2.48916   | 1.14867    | 1.30173    | 1.10395    |
| 1 | Nkain3    | 0 | 0.593205  | 0.0112928 | -0.0455469 | -0.12342  | 1.3764  | -1.20218 | -1.28022  | -1.80336   | -1.15874   | -1.59388   |
| 1 | Nkx2-2    | 0 | 0.398604  | -1.47156  | 0.290417   | 1.06314   | 2.00166 | 1.79224  | 1.88726   | 0.744562   | 1.11482    | 0.763007   |
| 1 | Nlrc3     | 0 | 0.321545  | 0.271627  | 0.583822   | 0.0835323 | 1.21735 | 2.30044  | 1.85467   | 0.422501   | 0.669107   | -1.47747   |
| 1 | Nlrc4     | 0 | 0.240456  | 1.07898   | 0.612195   | -0.375807 | 2.40146 | 2.00434  | 2.08548   | 0.531864   | 1.77029    | -0.215871  |
| 1 | Nlrp1b    | 0 | -0.607129 | -0.893336 | -1.67701   | -0.226654 | 1.48638 | 1.21202  | 1.50086   | 0.0157612  | 0.120616   | -0.255766  |
| 1 | Nlrp3     | 0 | -0.909847 | -0.120495 | 0.322239   | 1.08279   | 1.70853 | 1.87182  | 1.85555   | 0.43415    | -0.0811347 | -0.718347  |
| 1 | Nmi       | 0 | -0.259067 | 0.546672  | 0.819125   | 1.25134   | 2.8987  | 2.17552  | 2.57993   | 1.23425    | 1.55031    | 1.03428    |
| 1 | Notch3    | 0 | -0.335763 | -1.12856  | -0.818854  | 0.758127  | 1.62868 | 2.02242  | 1.46973   | 0.302127   | 0.26671    | 0.213576   |
| 1 | Notch4    | 0 | -0.146788 | -0.273245 | -0.132796  | 1.43097   | 1.63517 | 1.76849  | 0.0385987 | -0.71073   | -1.01476   | -0.876957  |
| 1 | Npc2      | 0 | 0.169387  | 0.108857  | 0.282055   | 0.398456  | 2.20391 | 2.45712  | 2.6525    | 1.12504    | 1.40969    | 0.592187   |
| 1 | Npepl1    | 0 | 0.0318242 | -0.336075 | -0.104102  | 1.3352    | 2.35798 | 1.98976  | 1.8076    | 0.593173   | 1.10082    | -0.382831  |
| 1 | Npl       | 0 | 0.518349  | 0.021428  | 0.335627   | 1.15888   | 2.44126 | 2.93873  | 1.77297   | 0.907704   | 0.554768   | 0.159193   |
| 1 | Nr1h3     | 0 | 0.903633  | 0.720702  | -0.0151703 | 1.37843   | 2.77687 | 2.77791  | 2.3721    | 1.13821    | 2.06652    | 1.11853    |
| 1 | Nrm       | 0 | -0.325321 | -1.47032  | -0.491622  | -0.304773 | 2.05211 | 1.5449   | 0.278575  | -0.476252  | -0.541629  | -0.453084  |
| 1 | Nrp1      | 0 | -0.447571 | 0.06386   | -0.374903  | -0.563526 | 1.80826 | 1.9521   | 1.92768   | 0.83659    | 1.01631    | -0.240177  |
| 1 | Nrros     | 0 | 1.22324   | 1.43061   | 0.762122   | 1.41452   | 2.58975 | 2.649    | 2.72482   | 0.570349   | 0.817549   | -0.0067186 |
| 1 | Nsl1      | 0 | -0.691273 | 0.0118855 | 1.02943    | 1.18244   | 2.63625 | 2.19949  | 0.994132  | 0.284124   | -0.0347991 | 0.752968   |
| 1 | Nt5dc2    | 0 | -0.233855 | -0.551671 | -0.148415  | -0.100658 | 2.82783 | 1.65907  | 1.2207    | 0.37444    | 0.748031   | 0.402262   |
| 1 | Nucb1     | 0 | 0.144796  | -0.233851 | -0.269302  | 0.339678  | 2.2338  | 2.51343  | 1.99911   | 0.646431   | 0.888879   | 0.585952   |
| 1 | Nuf2      | 0 | 0.0342906 | 0.059269  | -0.320835  | -0.230599 | 2.78666 | 2.18395  | 1.03472   | 0.852006   | 0.903703   | 0.566241   |

|   |        |   |           |            |            |            |           |           |           |           |           |            |
|---|--------|---|-----------|------------|------------|------------|-----------|-----------|-----------|-----------|-----------|------------|
| 1 | Nupr1  | 0 | 0.630513  | 0.374506   | 0.765585   | 1.34377    | 3.19057   | 2.72112   | 2.17372   | 1.79229   | 1.87357   | 1.09801    |
| 1 | Nusap1 | 0 | 0.270916  | 0.922041   | 0.563474   | 0.145271   | 3.08708   | 2.59417   | 1.41928   | 0.725433  | 0.696085  | 0.450605   |
| 1 | Oas1a  | 0 | 0.18844   | 0.144445   | 0.331913   | 1.03636    | 2.33736   | 2.42451   | 2.74461   | 0.840161  | 1.55706   | 0.666308   |
| 1 | Oas1b  | 0 | -0.241317 | 0.464559   | -0.0740099 | 0.950902   | 1.80301   | 2.25024   | 2.09283   | -0.513868 | 0.615133  | -0.247988  |
| 1 | Olfm13 | 0 | -0.193751 | -0.394589  | -0.619348  | 0.398429   | 2.12061   | 2.04768   | 1.93007   | 0.768881  | 0.478683  | 0.0775258  |
| 1 | Omp    | 0 | 1.0676    | 0.048439   | -0.0087567 | 0.535579   | 1.25045   | -0.813897 | -1.52609  | -1.65734  | -1.1445   | -0.93996   |
| 1 | Orai1  | 0 | 0.608534  | 0.0379378  | 0.478384   | 0.807777   | 3.15068   | 2.0355    | 1.49385   | 0.163246  | 0.30049   | 0.118314   |
| 1 | Ostf1  | 0 | -0.124877 | 0.0539783  | 0.206358   | 0.911353   | 2.8404    | 2.15884   | 2.00954   | 0.802167  | 1.38433   | 0.477385   |
| 1 | P2rx4  | 0 | 0.176409  | -0.18887   | -0.204813  | 0.289973   | 2.05441   | 1.89752   | 2.48446   | 0.804866  | 1.11734   | -0.219143  |
| 1 | P2ry12 | 0 | -0.593103 | -0.805724  | -1.43378   | -1.98527   | 0.784433  | 1.22461   | 1.04602   | 0.170924  | -0.135254 | 0.0464121  |
| 1 | P2ry13 | 0 | -0.902134 | -1.27592   | -1.09887   | -0.921348  | 0.650768  | 1.69636   | 1.37832   | 0.452721  | -0.200176 | -0.280432  |
| 1 | P2ry6  | 0 | -0.390324 | -0.0150944 | 0.0192162  | 1.18566    | 2.13713   | 2.15106   | 2.1184    | 0.922495  | 0.725948  | -0.27369   |
| 1 | P4ha3  | 0 | 0.308252  | 0.12433    | 0.0357094  | 1.29571    | 2.27029   | 2.58035   | 2.6282    | 1.56037   | 1.04275   | 1.17386    |
| 1 | P4hb   | 0 | 0.340126  | 0.746758   | 0.835339   | 1.79298    | 2.87065   | 3.03827   | 2.44752   | 1.52096   | 1.33982   | 1.09899    |
| 1 | Pak4   | 0 | 0.125347  | -0.268128  | -0.722674  | 0.600067   | 2.31276   | 2.2238    | 1.4531    | 0.0584575 | 0.460312  | 1.20511    |
| 1 | Pald1  | 0 | 0.506784  | 0.546463   | 0.722355   | 0.8984     | 2.57957   | 2.8595    | 2.74285   | 1.46648   | 1.23467   | 0.639803   |
| 1 | Pald   | 0 | -0.436147 | -0.0020096 | 0.530924   | 1.28428    | 2.30859   | 2.21065   | 1.94637   | 0.662423  | 1.13743   | -0.293812  |
| 1 | Paox   | 0 | -0.329828 | -1.19      | -0.580435  | -0.0919471 | 1.73557   | 1.5613    | 1.63195   | -0.144403 | -0.387132 | -0.383953  |
| 1 | Parp10 | 0 | -0.22984  | -0.123764  | -0.0665893 | 0.928292   | 1.90371   | 2.31253   | 2.51551   | 0.483282  | 1.12397   | 0.559354   |
| 1 | Parp12 | 0 | 0.211236  | 0.379689   | 0.84877    | 1.3445     | 2.65265   | 2.67648   | 2.81819   | 1.26111   | 1.24599   | 1.09221    |
| 1 | Parp3  | 0 | -0.241014 | 0.414563   | 0.693938   | 2.23743    | 2.45615   | 2.27307   | 2.01175   | 1.03308   | 1.10553   | 0.093886   |
| 1 | Parvb  | 0 | 0.320762  | 0.719057   | 0.674014   | 1.79667    | 2.38531   | 2.17906   | 1.06014   | 0.34004   | -0.193658 | -0.762086  |
| 1 | Parvg  | 0 | -0.262336 | -0.183206  | -0.291287  | 0.270496   | 2.13394   | 2.09493   | 2.15487   | 0.897625  | 0.650263  | 0.0062574  |
| 1 | Pbk    | 0 | -0.21957  | 0.200437   | 0.0538796  | 0.182079   | 2.69488   | 2.157     | 1.12016   | 0.441276  | 0.372687  | -0.484504  |
| 1 | Pbxip1 | 0 | 0.208038  | 0.136264   | 0.296948   | 0.861546   | 3.03153   | 2.1605    | 2.03      | 0.860057  | 0.891778  | 0.255862   |
| 1 | Pcolce | 0 | -0.636963 | -0.703545  | -0.631211  | 0.0883848  | 1.79144   | 1.96891   | 1.68399   | 0.465333  | 1.00134   | 0.206286   |
| 1 | Pcsk1n | 0 | -0.756543 | -1.80707   | -2.70133   | -1.13768   | 0.595319  | -1.35029  | -2.33191  | -1.31697  | -1.08049  | -0.0478286 |
| 1 | Pctp   | 0 | -0.558089 | 0.0654467  | -0.925635  | 0.327757   | 2.27418   | 1.84341   | 1.67696   | 0.463974  | 0.890481  | 0.595776   |
| 1 | Pde3b  | 0 | 0.228293  | 0.710421   | 0.703383   | 1.07696    | 1.89389   | 2.92235   | 2.46688   | 0.852175  | 0.282735  | -0.0224314 |
| 1 | Pdgfrb | 0 | -0.562763 | -0.521616  | 0.4273     | 0.914879   | 1.94346   | 2.39428   | 1.86353   | 0.422361  | 0.65849   | 0.0256045  |
| 1 | Pdgfrl | 0 | -0.281938 | -0.454594  | -1.2351    | -0.397539  | 1.60722   | 1.60575   | 1.73967   | 0.521633  | 1.18103   | 0.545813   |
| 1 | Pdia4  | 0 | 0.482722  | -0.072401  | -1.03412   | 0.648479   | 1.70876   | 2.18328   | 1.93669   | 1.45326   | 0.651016  | -0.0374626 |
| 1 | Pdlim2 | 0 | 0.14611   | 0.0295558  | 0.999374   | 0.372926   | 3.11762   | 2.25774   | 1.92235   | 1.07889   | 0.969179  | 0.771873   |
| 1 | Pdlim4 | 0 | 0.0614914 | 0.598848   | 0.783077   | 2.13331    | 3.26286   | 1.71819   | 1.30181   | 0.914201  | 0.84669   | 0.046596   |
| 1 | Pear1  | 0 | -0.140679 | -0.284295  | 0.880682   | 1.82638    | 2.47834   | 2.12157   | 2.07468   | 0.579463  | 1.00582   | 0.237453   |
| 1 | Pecr   | 0 | 0.391308  | 0.470039   | 0.125248   | 1.08205    | 3.0519    | 1.46126   | 2.74829   | 1.46629   | 1.38282   | 0.739553   |
| 1 | Pet117 | 0 | -0.769672 | -1.78269   | -2.45545   | -0.673918  | -0.586653 | -1.05097  | -0.512359 | 0.0699461 | -0.162945 | 1.37826    |
| 1 | Pex13  | 0 | -0.704269 | -1.03178   | -1.46404   | -0.76539   | 0.13067   | -1.48426  | -2.7939   | -1.50885  | -0.812033 | 0.956169   |

|   |           |   |            |            |            |            |          |          |          |            |            |            |
|---|-----------|---|------------|------------|------------|------------|----------|----------|----------|------------|------------|------------|
| 1 | Pf4       | 0 | 0.572619   | 0.651773   | -0.438124  | 1.28734    | 3.01238  | 2.14559  | 1.53545  | 0.231878   | 1.58334    | 1.04495    |
| 1 | Pgd       | 0 | 0.371093   | 0.101713   | 1.02423    | 2.07345    | 2.83969  | 2.52353  | 2.06878  | 0.914633   | 1.40451    | 0.436558   |
| 1 | Pgls      | 0 | -0.416765  | -0.863611  | -0.873409  | 0.353091   | 2.69954  | 1.08205  | 0.5777   | -0.0788965 | 0.272615   | -0.0173894 |
| 1 | Phf11a    | 0 | 0.905521   | 0.29176    | 1.04071    | 1.75325    | 3.09266  | 2.48384  | 2.8448   | 1.50558    | 1.90974    | 1.05913    |
| 1 | Phf11b    | 0 | -0.683485  | -1.42513   | -0.219178  | 1.00817    | 1.46674  | 1.47857  | 1.66542  | 0.90985    | 1.16238    | 0.374297   |
| 1 | Phlda3    | 0 | 0.0930628  | -0.47464   | 0.545776   | 2.38946    | 2.37194  | 1.53273  | 1.21103  | 0.766597   | 1.44445    | 2.23116    |
| 1 | Piezo2    | 0 | 0.537875   | -0.287657  | 0.470107   | 1.65675    | 2.85344  | 2.19751  | 2.2225   | 1.51274    | 1.64347    | 0.856804   |
| 1 | Pik3cg    | 0 | -0.694049  | -0.628082  | -0.389955  | -0.0792833 | 1.48285  | 2.08083  | 1.81491  | 0.926989   | 0.324964   | -0.272179  |
| 1 | Pilra     | 0 | 0.831481   | 0.668025   | 0.619335   | 2.05629    | 2.92048  | 2.11937  | 2.13281  | 0.935055   | 1.42216    | -0.309737  |
| 1 | Pipox     | 0 | 0.748699   | 0.895116   | 0.696016   | 1.70577    | 3.71794  | 1.36211  | 2.39204  | 2.09835    | 1.5998     | 1.71386    |
| 1 | Plac9b    | 0 | 0.0313523  | -0.498256  | -0.431584  | 0.747873   | 2.75364  | 1.9515   | 0.956872 | 1.03824    | 1.29767    | 1.10773    |
| 1 | Plbd1     | 0 | -0.185818  | 0.275467   | -0.624833  | 0.897568   | 2.42217  | 1.09904  | 2.24559  | 1.15183    | 1.76213    | 0.309092   |
| 1 | Plcb2     | 0 | -0.773697  | -0.989497  | -1.34574   | -0.724651  | 1.15282  | 1.41016  | 1.61006  | 0.351933   | 0.0098381  | -0.264093  |
| 1 | Plcb3     | 0 | -0.191769  | 0.133544   | -0.0824742 | 1.05791    | 2.35667  | 2.52203  | 2.12451  | 1.08351    | 1.21892    | 0.574525   |
| 1 | Plcg2     | 0 | 0.0397189  | 0.101943   | 0.204626   | 0.858904   | 2.40844  | 2.47422  | 2.32166  | 1.1845     | 1.10823    | 0.181164   |
| 1 | Pld4      | 0 | 0.292748   | 0.139669   | -0.346023  | -0.148274  | 2.12925  | 2.32974  | 2.22797  | 1.14498    | 0.908858   | 0.37241    |
| 1 | Plekha4   | 0 | -0.385361  | 0.532765   | 0.103013   | 0.543488   | 1.84262  | 1.83246  | 2.29436  | 1.17454    | 0.733025   | -0.90226   |
| 1 | Plekhg2   | 0 | -0.0093097 | -0.383706  | 0.119258   | 1.217      | 2.37654  | 1.92061  | 1.10381  | 0.0710267  | -0.0520004 | -0.787742  |
| 1 | Plgrkt    | 0 | -0.469661  | -0.366684  | -0.302693  | 0.279375   | 2.57394  | 1.96981  | 1.49867  | 0.79808    | 0.891831   | 0.558754   |
| 1 | Plin2     | 0 | 0.0097911  | 0.217908   | 0.517202   | 1.34206    | 2.71168  | 2.67078  | 1.85029  | 0.855922   | 1.22706    | 0.239371   |
| 1 | Plin3     | 0 | 1.0114     | 0.544184   | 0.55614    | 0.802999   | 3.42643  | 2.11444  | 1.82223  | 0.869029   | 0.840562   | 0.0972101  |
| 1 | Plk1      | 0 | 0.0334826  | -0.241726  | 0.0684969  | -0.606579  | 2.14151  | 1.7118   | 0.385254 | -1.05777   | -0.912481  | -0.296724  |
| 1 | Plip      | 0 | -0.371091  | -0.520543  | -0.503945  | 0.313394   | 2.47432  | 1.57929  | 1.5901   | 1.13745    | 1.08868    | 1.17351    |
| 1 | Plod1     | 0 | 0.329563   | -0.0184066 | -0.166185  | 0.760122   | 1.9825   | 2.73026  | 2.18082  | 0.932688   | 0.814525   | 0.062125   |
| 1 | Plod3     | 0 | 0.0653074  | -0.0945427 | -0.680279  | 1.39367    | 1.90535  | 1.77179  | 1.82676  | 0.204979   | 0.0271174  | -0.665482  |
| 1 | Plp1      | 0 | 0.661456   | 0.683215   | 0.899288   | 0.527359   | 3.64828  | 2.1249   | 1.8832   | 1.1704     | 0.94761    | 0.908395   |
| 1 | Plp2      | 0 | 0.219096   | 0.134056   | 0.533244   | 1.49804    | 3.0697   | 2.4197   | 1.15734  | 0.606943   | 1.0698     | 0.167841   |
| 1 | Plxdc2    | 0 | 0.132119   | 0.15283    | -0.312573  | -0.0709116 | 1.58102  | 2.59531  | 2.35239  | 1.0221     | 0.660173   | 0.356308   |
| 1 | Plxna4os1 | 0 | -0.811252  | -0.32876   | -0.394848  | -0.465505  | 1.75689  | 1.78298  | 1.75681  | 0.598262   | 0.351172   | -0.531236  |
| 1 | Plxnb3    | 0 | -0.313422  | -0.760748  | -0.690299  | 0.770791   | 1.92998  | 2.15025  | 1.554    | 0.636377   | 0.589902   | 0.144068   |
| 1 | Pmf1      | 0 | 0.120729   | 0.563626   | 0.544569   | 0.844067   | 3.54425  | 2.0956   | 1.33844  | 0.733637   | 0.979659   | 1.01232    |
| 1 | Pnp       | 0 | -0.162051  | -0.0142607 | 0.493854   | 1.25029    | 3.03624  | 2.08427  | 1.92704  | 1.17844    | 1.24728    | 0.717074   |
| 1 | Pnpla3    | 0 | -0.64524   | -2.96347   | -1.46181   | -2.56393   | -1.23705 | -1.13629 | -2.83354 | -2.32935   | -2.01335   | -2.90969   |
| 1 | Pola1     | 0 | 0.299617   | -0.113702  | 0.0050251  | 1.2202     | 3.04082  | 1.74298  | 1.66547  | 1.4909     | 0.936484   | 0.0708795  |
| 1 | Pold4     | 0 | 0.195761   | -0.19877   | 0.197567   | 0.950119   | 3.16758  | 1.80348  | 1.50171  | 0.663738   | 0.912106   | 0.0946119  |
| 1 | Pole      | 0 | 0.149521   | 0.166973   | 0.12505    | 0.892378   | 2.69017  | 2.7012   | 1.66954  | 0.969511   | 0.283851   | 1.30495    |
| 1 | Pou2f2    | 0 | 0.122526   | -0.384684  | 0.032941   | -0.0891564 | 2.43572  | 1.71406  | 1.46987  | 0.225865   | 0.194053   | -0.904152  |
| 1 | Ppap2c    | 0 | -0.0398247 | -0.311275  | 0.699413   | 1.84687    | 2.84221  | 1.75527  | 1.77729  | 1.4361     | 1.44706    | 0.303287   |

|   |          |   |            |            |            |          |           |          |          |           |           |           |
|---|----------|---|------------|------------|------------|----------|-----------|----------|----------|-----------|-----------|-----------|
| 1 | Ppib     | 0 | -0.213613  | -0.285885  | -0.668548  | 0.408916 | 2.55447   | 2.01989  | 1.4505   | 0.778466  | 0.690642  | 0.62605   |
| 1 | Ppic     | 0 | -0.0353206 | -0.104109  | 0.224364   | 0.751172 | 2.44829   | 2.32081  | 2.17778  | 1.24892   | 1.23323   | 0.144681  |
| 1 | Ppp1r14a | 0 | -0.197194  | -0.610588  | -1.32159   | 0.207265 | 2.13793   | 1.24232  | 1.02275  | 0.882916  | 0.988183  | 1.35943   |
| 1 | Ppp1r14b | 0 | -0.281373  | -0.188736  | -0.523044  | 1.2196   | 2.97434   | 1.1843   | 0.762853 | 0.0782707 | 0.338566  | 0.0125858 |
| 1 | Ppp1r18  | 0 | -0.0261876 | 0.379443   | 0.614239   | 1.69514  | 2.76763   | 2.48745  | 2.28259  | 0.643455  | 0.983368  | 1.59456   |
| 1 | Prc1     | 0 | 0.221752   | 0.289258   | 0.404853   | 0.341954 | 2.97943   | 2.21244  | 1.19676  | 0.220639  | 0.3486    | -0.206973 |
| 1 | Prcp     | 0 | -0.240139  | 0.0274247  | -0.0627175 | 0.300434 | 2.29353   | 1.61931  | 2.61001  | 1.18925   | 1.15966   | 0.306765  |
| 1 | Prdm1    | 0 | 1.12102    | 1.19578    | 0.978879   | 0.926518 | 2.73673   | 1.82633  | 3.35476  | 0.689102  | 1.32168   | 0.256616  |
| 1 | Prdx1    | 0 | 0.0091871  | 0.0131121  | 0.549588   | 1.46035  | 3.328     | 1.87008  | 1.6447   | 1.1147    | 1.45225   | 0.970231  |
| 1 | Prdx4    | 0 | 0.22614    | 0.0913568  | 0.168701   | 0.529705 | 3.29169   | 1.87068  | 1.45332  | 0.383476  | 1.04727   | 1.31704   |
| 1 | Prdx6    | 0 | 0.05064    | 0.454027   | 0.29657    | 0.865864 | 3.04875   | 2.29239  | 2.11268  | 1.24957   | 0.934985  | 0.569603  |
| 1 | Prkd2    | 0 | 1.04546    | 0.944769   | 1.31936    | 1.90875  | 3.63853   | 2.34895  | 1.96814  | 0.667075  | 1.63098   | 2.50476   |
| 1 | Prr5l    | 0 | 0.191949   | 0.508141   | 1.08458    | 2.10725  | 2.9973    | 2.03193  | 2.7166   | 1.26379   | 1.27171   | 0.698763  |
| 1 | Prr7     | 0 | -1.79203   | -1.8094    | -3.16735   | -2.12552 | -0.396651 | -2.16962 | -2.74153 | -2.27038  | -1.80918  | -0.510519 |
| 1 | Prrx1    | 0 | -0.935068  | -0.512242  | -0.0636559 | 0.54029  | 2.61636   | 1.37912  | 1.39087  | 0.59197   | 0.845057  | 0.0647498 |
| 1 | Psd4     | 0 | -0.683821  | -0.555239  | -0.741848  | 0.54917  | 1.78029   | 1.29186  | 2.15514  | 0.591386  | 0.96707   | -0.184217 |
| 1 | Psmb8    | 0 | -0.342198  | -0.366325  | -0.214239  | 0.839458 | 2.17956   | 1.90787  | 2.27362  | 1.13764   | 1.26294   | 0.570458  |
| 1 | Psme1    | 0 | 0.190349   | 0.377255   | 0.214564   | 0.794048 | 3.15829   | 2.11545  | 2.20172  | 1.25224   | 1.36323   | 0.975897  |
| 1 | Psme2    | 0 | -0.0808452 | -0.610562  | -0.28554   | 0.865543 | 2.63269   | 1.67302  | 1.89569  | 0.869699  | 1.0632    | 0.668793  |
| 1 | Psme2b   | 0 | -0.0382207 | -0.0316621 | 0.15155    | 0.357685 | 2.51159   | 1.54985  | 1.70575  | -0.160216 | -0.669752 | -0.303637 |
| 1 | Pstpip1  | 0 | -0.189137  | 0.0674761  | 0.640762   | 1.12841  | 2.54381   | 1.43804  | 2.30921  | 1.03779   | 2.2095    | 0.0921031 |
| 1 | Ptbp3    | 0 | 0.0847797  | 0.556394   | 0.732325   | 1.69024  | 2.32074   | 2.43631  | 2.47227  | 0.744268  | 0.934883  | -0.194936 |
| 1 | Pter     | 0 | 0.898149   | 0.740747   | 1.35706    | 1.55394  | 3.29351   | 2.80386  | 2.76538  | 2.17759   | 1.87958   | 2.29882   |
| 1 | Ptgr1    | 0 | 0.579731   | 0.468805   | -0.145689  | 1.25897  | 3.1287    | 2.32385  | 1.72368  | 1.54767   | 1.54007   | 0.621493  |
| 1 | Ptgs1    | 0 | 0.186832   | 0.493115   | 0.916756   | 1.1364   | 2.20503   | 2.34337  | 3.02279  | 1.0365    | 0.250052  | 0.498101  |
| 1 | Ptpn18   | 0 | -0.0683656 | -0.0583747 | -0.444897  | 0.340139 | 2.38287   | 2.04786  | 2.09639  | 1.31901   | 1.16369   | 0.716774  |
| 1 | Pusl1    | 0 | -1.92478   | -2.87987   | -1.07326   | -1.5463  | -0.694962 | -1.73833 | -1.35041 | -1.50064  | -1.03879  | -3.64806  |
| 1 | Pvrl2    | 0 | 0.945064   | 0.713586   | 1.20468    | 1.30802  | 3.9834    | 2.13278  | 1.80146  | 1.62586   | 1.3454    | 1.4643    |
| 1 | Pycard   | 0 | -0.254509  | -0.486768  | 0.0726406  | 1.22082  | 2.27428   | 2.15136  | 2.11579  | 1.15499   | 1.20205   | 0.652292  |
| 1 | Rab13    | 0 | 1.18036    | 0.907719   | 0.889956   | 1.10871  | 3.46457   | 2.94718  | 2.45173  | 1.74992   | 1.64561   | 1.53202   |
| 1 | Rab29    | 0 | -0.23648   | -0.0015729 | 0.57127    | 1.15948  | 2.56976   | 2.42354  | 2.21322  | 1.54366   | 1.51359   | 0.95227   |
| 1 | Rab32    | 0 | -0.333165  | 0.297465   | 0.230572   | 0.975751 | 2.56549   | 2.47696  | 2.102    | 1.07578   | 0.988926  | 0.464961  |
| 1 | Rab3il1  | 0 | -0.413712  | -0.722399  | -0.375961  | 0.792385 | 1.84659   | 2.09456  | 1.93093  | 0.925618  | 1.00741   | 0.287885  |
| 1 | Rab7b    | 0 | -0.115987  | 0.282267   | 0.307164   | 0.864814 | 2.82931   | 2.31825  | 2.17725  | 1.01342   | 1.46165   | 0.659897  |
| 1 | Rac2     | 0 | 0.0431692  | -0.370918  | 0.0588571  | 0.576376 | 2.63414   | 1.71231  | 2.0204   | 0.594443  | 0.777238  | -0.289659 |
| 1 | Racgap1  | 0 | -0.0906146 | -0.0686902 | 0.435356   | 0.186502 | 2.59418   | 2.07737  | 0.372468 | -0.164695 | -0.783317 | 0.322701  |
| 1 | Rad51    | 0 | -0.1302    | 0.0151405  | 0.245723   | 0.79251  | 2.9342    | 2.30354  | 0.585591 | 0.490211  | 0.0324295 | 0.433431  |
| 1 | Rad51ap1 | 0 | -0.507446  | 0.825664   | -0.462746  | 0.163183 | 2.43399   | 1.86256  | 0.323708 | -0.67786  | -0.35292  | 0.152175  |



|   |            |   |            |            |            |           |          |          |           |           |           |            |
|---|------------|---|------------|------------|------------|-----------|----------|----------|-----------|-----------|-----------|------------|
| 1 | Ramp2      | 0 | -0.238488  | -0.272106  | 0.191928   | 0.71584   | 3.24247  | 1.62391  | 0.986862  | 0.594054  | 0.898734  | 0.591694   |
| 1 | Rarres2    | 0 | 0.166613   | -0.099114  | 0.348315   | 0.219694  | 2.59492  | 1.69665  | 1.89406   | 1.69467   | 2.2659    | 1.56043    |
| 1 | Rasa4      | 0 | -0.450025  | 0.0560553  | -0.542236  | 0.194434  | 1.95968  | 1.91712  | 2.35321   | 0.662876  | 0.701504  | 0.248339   |
| 1 | Rasal3     | 0 | -0.572546  | -0.444532  | -0.536892  | 0.14552   | 1.53388  | 2.05142  | 2.0453    | 1.06815   | 0.71751   | -0.0409865 |
| 1 | Rassf10    | 0 | -0.45002   | -0.185181  | -0.727453  | -0.111573 | 0.825113 | 2.45918  | 1.18492   | 0.638779  | -0.164794 | -1.08246   |
| 1 | Rbl1       | 0 | -0.518783  | 0.0288797  | 0.0638085  | 0.775601  | 2.0515   | 2.54323  | 2.03268   | 0.790494  | 1.03796   | 0.245047   |
| 1 | Rbms2      | 0 | -0.503251  | 0.0910617  | 0.696971   | 1.10121   | 2.61738  | 2.41111  | 1.13118   | 0.508106  | 0.127034  | 0.0657269  |
| 1 | Rbp1       | 0 | 0.295888   | 0.511231   | 0.612412   | 0.667042  | 3.60525  | 1.92221  | 1.2703    | 0.747128  | 0.975378  | 0.520119   |
| 1 | Rbpms      | 0 | 1.1        | 1.35555    | 0.546658   | 1.52587   | 3.27571  | 2.18922  | 3.00925   | 1.23199   | 1.19759   | 0.724742   |
| 1 | Rcctb2     | 0 | -0.105049  | -0.103676  | -0.233654  | 0.214935  | 1.8838   | 2.41951  | 2.20903   | 0.942682  | 0.996578  | 0.0982374  |
| 1 | Rcsd1      | 0 | 0.659186   | 0.0708802  | -0.0016129 | 0.613639  | 2.21158  | 2.33622  | 2.63937   | 1.60143   | 1.61811   | 0.4413     |
| 1 | Reep4      | 0 | 0.884189   | 0.488962   | 0.692783   | 0.897856  | 3.31355  | 2.6307   | 1.58856   | 0.714121  | 1.32049   | 0.363921   |
| 1 | Renbp      | 0 | 0.614232   | 0.198672   | 0.372527   | 0.997022  | 2.63454  | 2.47764  | 2.55468   | 1.27096   | 1.65749   | 0.334417   |
| 1 | Rfc4       | 0 | 0.368504   | -0.0369405 | -0.805731  | 1.2011    | 2.81912  | 1.79811  | 0.288514  | 0.593496  | 0.0842597 | 0.25295    |
| 1 | Rgl3       | 0 | -0.259365  | 0.363279   | -0.200632  | 0.341594  | 2.22465  | 2.21575  | 1.70045   | 1.09279   | -0.416139 | -0.0457271 |
| 1 | Rgs10      | 0 | 0.446992   | 0.598215   | 0.314872   | 0.147862  | 2.75037  | 2.42313  | 2.51658   | 1.46038   | 1.39791   | 1.17826    |
| 1 | Rhbd1      | 0 | -0.423372  | -2.2474    | -1.78891   | -1.40969  | -1.41243 | -2.57027 | -3.24748  | -2.0409   | -2.45504  | -2.90979   |
| 1 | Rhoc       | 0 | 0.86554    | 0.834953   | 1.27831    | 2.17764   | 3.59643  | 2.47483  | 1.7716    | 1.07812   | 1.47475   | 0.599926   |
| 1 | Rhog       | 0 | 0.208282   | 0.160996   | 0.625826   | 0.73862   | 2.81883  | 2.28701  | 2.2286    | 0.901447  | 0.980701  | 0.0115662  |
| 1 | Rhoh       | 0 | 0.905375   | 0.512838   | 0.0778084  | 1.13674   | 2.62786  | 2.5153   | 2.63675   | 1.45333   | 0.9537    | 0.316739   |
| 1 | Rin3       | 0 | 0.9086     | 1.11413    | 0.674577   | 1.34261   | 2.92815  | 2.32829  | 2.68063   | 1.37884   | 1.36706   | -0.152862  |
| 1 | Rinl       | 0 | -0.0226681 | 0.331339   | 0.620436   | 0.653093  | 2.70825  | 2.34334  | 2.16287   | 0.531588  | 1.09435   | 0.0161245  |
| 1 | Rmrp       | 0 | 0.224783   | 0.286642   | 0.17175    | 1.69511   | 3.40924  | 1.58774  | 0.508585  | 0.988008  | 1.58026   | 1.16565    |
| 1 | Rnase4     | 0 | -0.0066616 | 0.0389108  | 0.167212   | 0.0453925 | 2.27226  | 2.63963  | 1.98684   | 0.998231  | 1.17826   | 0.472796   |
| 1 | Rnase6     | 0 | -0.401056  | -0.949962  | -1.07625   | -0.597504 | 1.1453   | 0.144789 | 1.68646   | 1.05501   | 1.40492   | -0.660655  |
| 1 | Rnaseh2c   | 0 | -0.707951  | -1.40956   | -1.45976   | -0.253228 | 2.21188  | 0.53751  | -0.211377 | -0.228017 | 0.390934  | -0.235668  |
| 1 | Rnaset2a   | 0 | -0.017782  | 0.338674   | 1.05594    | 0.911118  | 2.68655  | 2.67488  | 2.13542   | 1.5575    | 1.63527   | 0.390007   |
| 1 | Rnaset2b   | 0 | -0.0284024 | -0.0613697 | -0.672758  | 0.0413073 | 2.477    | 1.60316  | 2.10455   | 0.924394  | 0.582979  | 0.417124   |
| 1 | Rnf122     | 0 | -0.527092  | -0.0723073 | -0.0782727 | 1.40267   | 1.10035  | 1.88615  | 0.980378  | 0.550091  | 0.0036563 | -1.69111   |
| 1 | Rnf135     | 0 | 0.45026    | -0.369768  | -0.833075  | 0.0881292 | 1.7014   | 2.05966  | 2.3044    | 0.82957   | 0.325311  | 0.525128   |
| 1 | Rnf26      | 0 | -0.32149   | -2.4169    | -2.79144   | -1.01162  | 0.381366 | -1.32576 | -1.54379  | -1.35441  | -2.25828  | -1.31048   |
| 1 | Rnh1       | 0 | 0.256649   | 0.0980881  | 0.623234   | 1.12932   | 3.24952  | 1.64779  | 1.67094   | 0.395909  | 1.0063    | -0.131907  |
| 1 | Rom1       | 0 | 0.0958721  | -0.667758  | -0.159839  | 0.73178   | 2.86273  | 1.93702  | 1.14136   | 0.403463  | 0.877801  | 0.858698   |
| 1 | Rplp0      | 0 | 0.0087522  | -0.120477  | -0.0984067 | 1.22665   | 3.22826  | 1.5355   | 1.48256   | 0.752982  | 0.852809  | 0.620222   |
| 1 | Rprml      | 0 | -0.554559  | -1.78429   | -3.2064    | -2.11549  | -1.19293 | -2.45831 | -2.72165  | -2.37014  | -2.88857  | -2.31708   |
| 1 | Rps15a-ps4 | 0 | 0.0698826  | 0.24518    | 0.419956   | 1.11463   | 3.55297  | 1.59142  | 1.41692   | 1.26184   | 1.4464    | 0.925183   |
| 1 | Rps27l     | 0 | 0.317217   | -0.62722   | 0.783819   | 2.02816   | 3.00506  | 1.28869  | 0.973143  | 0.430653  | 0.61263   | 0.265455   |
| 1 | Rps6ka1    | 0 | -0.3455    | -0.262636  | 0.256718   | 0.555613  | 1.98255  | 2.44284  | 2.35475   | 1.05805   | 0.815471  | 0.637806   |

|   |           |   |            |           |            |           |           |          |          |            |            |            |
|---|-----------|---|------------|-----------|------------|-----------|-----------|----------|----------|------------|------------|------------|
| 1 | Rpusd3    | 0 | 0.478535   | -3.19998  | -1.5144    | -1.87043  | -0.438101 | -1.06376 | -1.55876 | -1.58083   | -0.777667  | -1.5794    |
| 1 | Rras      | 0 | 0.0428178  | 0.393603  | 0.809502   | 1.64651   | 3.14112   | 1.97791  | 1.00858  | 0.654766   | 0.311725   | -0.115323  |
| 1 | Rrbp1     | 0 | 0.306268   | 0.372122  | 0.508158   | 1.47557   | 2.82988   | 2.40252  | 2.40289  | 0.976738   | 1.10153    | 0.228137   |
| 1 | Rrm2      | 0 | 0.0983055  | 0.0677965 | 0.0881639  | 0.185905  | 2.72895   | 2.14319  | 0.936797 | 0.0178326  | -0.151573  | -0.291809  |
| 1 | Rsu1      | 0 | -0.0874854 | -0.401126 | -0.0506872 | 0.811059  | 1.85727   | 2.4203   | 2.35813  | 0.92716    | 0.712818   | 0.339751   |
| 1 | Rtkn2     | 0 | 1.14071    | 2.28952   | 0.359416   | 1.02973   | 2.53653   | 2.98546  | 1.81644  | 1.20446    | 0.281505   | 2.24576    |
| 1 | Runx1     | 0 | 0.506876   | 0.721985  | 0.763742   | 1.65677   | 2.58443   | 2.65892  | 2.58971  | 1.09831    | 1.34261    | -0.0206396 |
| 1 | S100a1    | 0 | 0.0397157  | 0.0261357 | 0.0080844  | 0.0477949 | 3.12282   | 1.7931   | 1.21737  | 1.11494    | 1.13984    | 1.3707     |
| 1 | S100a10   | 0 | 0.487467   | 0.887856  | 0.598522   | 1.8202    | 3.75879   | 1.43477  | 0.969743 | 0.846982   | 0.755292   | 0.63165    |
| 1 | S100a11   | 0 | 0.240929   | 0.484785  | 1.04026    | 2.13778   | 3.27327   | 2.40101  | 2.04548  | 1.42335    | 1.68178    | 0.969251   |
| 1 | S100a13   | 0 | 0.197102   | 0.275419  | 0.473369   | 1.11841   | 3.57352   | 1.84934  | 1.34692  | 1.19162    | 1.00481    | 0.705508   |
| 1 | S100a16   | 0 | -0.123093  | 0.107235  | 0.102728   | 1.53018   | 3.36592   | 1.11719  | 0.888814 | 0.531904   | 0.458036   | 0.423529   |
| 1 | S100a4    | 0 | -0.183476  | 0.0449563 | 0.246009   | 1.56596   | 2.63073   | 2.05614  | 2.24438  | 1.50932    | 1.52998    | 0.689222   |
| 1 | S100a6    | 0 | -0.103377  | 0.0184481 | 0.454518   | 1.41431   | 3.08692   | 2.10407  | 1.786    | 1.33423    | 1.24889    | 0.708527   |
| 1 | S1pr2     | 0 | -1.11108   | -0.709959 | 0.184673   | 0.269095  | 2.14641   | 1.55007  | 1.22531  | -0.643891  | 0.255258   | -0.111107  |
| 1 | Sall1     | 0 | -0.240533  | -0.860438 | 0.111012   | 0.398546  | 1.95466   | 2.11678  | 2.13182  | 0.764701   | 0.502      | 0.392763   |
| 1 | Sall3     | 0 | 0.917584   | 0.470109  | 0.895915   | 1.09078   | 3.35566   | 1.66409  | 1.55065  | 0.159663   | 0.449734   | -0.19514   |
| 1 | Samhd1    | 0 | -0.532144  | -0.579862 | -0.362506  | 0.363014  | 1.68822   | 1.79238  | 2.34182  | 0.309057   | 0.698099   | 0.0397708  |
| 1 | Samsn1    | 0 | 0.236324   | 0.218409  | 0.839975   | 1.24756   | 2.59224   | 2.13921  | 2.7181   | 1.62233    | 1.00629    | 0.0972149  |
| 1 | Sap30     | 0 | 1.35985    | 1.21756   | 1.38519    | 1.55365   | 3.61796   | 2.4589   | 1.77518  | 0.334435   | 1.66566    | 2.4638     |
| 1 | Sash3     | 0 | 0.36238    | 0.375178  | 0.11719    | 0.66905   | 2.40926   | 2.55997  | 2.5803   | 1.69908    | 1.68803    | 1.0348     |
| 1 | Scamp2    | 0 | -0.0228268 | -0.514995 | -0.542665  | 0.373253  | 2.6483    | 1.49689  | 1.55882  | 0.399112   | 0.178471   | -0.207968  |
| 1 | Sdf2l1    | 0 | 1.00291    | 0.836166  | -0.139685  | 0.861795  | 3.12716   | 2.20965  | 0.992738 | 1.21089    | 0.753812   | -0.255596  |
| 1 | Selplg    | 0 | -0.225373  | -0.774997 | -1.15979   | -1.26478  | 1.29742   | 1.3645   | 1.56526  | 0.339361   | -0.153555  | -0.536982  |
| 1 | Sepw1     | 0 | 0.0657361  | -0.49237  | -0.265835  | -0.596597 | 0.124492  | -1.62283 | -2.27624 | -1.67583   | -2.38175   | -2.12388   |
| 1 | Serhl     | 0 | -0.0954263 | 0.526763  | 0.40288    | 0.573813  | 2.71335   | 2.37703  | 2.33453  | 1.211      | 1.64812    | 0.648081   |
| 1 | Serpina3n | 0 | 0.171103   | 0.501263  | 0.690196   | 2.36756   | 2.71331   | 2.40949  | 2.21154  | 1.76263    | 1.44324    | 0.516574   |
| 1 | Serpinb1b | 0 | 0.657252   | -0.127014 | 0.0525339  | 0.637823  | 2.9282    | 0.740719 | 1.59064  | 1.54995    | 2.03827    | 2.09148    |
| 1 | Serpinf1  | 0 | 0.0893769  | 0.212972  | 0.0969703  | 0.393296  | 2.45774   | 1.97864  | 2.43394  | 1.23468    | 1.60361    | 0.0919769  |
| 1 | Sgol1     | 0 | 0.403425   | 0.753009  | 0.716811   | 1.04231   | 3.06041   | 2.40396  | 1.45805  | 1.10203    | 0.822064   | -0.429296  |
| 1 | Sgol2a    | 0 | -0.063582  | -0.118566 | 0.123893   | 0.373846  | 2.93176   | 1.76833  | 0.668702 | 0.686684   | -0.0133426 | -0.52637   |
| 1 | Sgsh      | 0 | -0.531144  | -0.381519 | -0.377347  | 0.213627  | 1.65767   | 2.14567  | 2.04239  | 0.404392   | 1.27266    | 0.13772    |
| 1 | Sh3bp2    | 0 | 0.34044    | 1.27877   | 1.12407    | 1.51301   | 2.91121   | 2.48561  | 2.76764  | 1.58667    | 1.19641    | 0.214792   |
| 1 | Sh3tc1    | 0 | -0.40905   | 0.0550758 | 0.396718   | 0.970941  | 2.3734    | 2.07826  | 2.2103   | 0.930279   | 0.439803   | -0.152373  |
| 1 | Shc1      | 0 | 0.0294095  | 0.554338  | 1.07488    | 1.28975   | 2.33351   | 2.44048  | 2.30884  | -0.0223735 | 0.75743    | -0.0520626 |
| 1 | Shcbp1    | 0 | -0.144695  | 0.0480616 | 0.444633   | 0.572026  | 3.06483   | 2.10857  | 1.1523   | 0.720526   | 0.207808   | 0.150793   |
| 1 | Shisa5    | 0 | 0.122959   | -0.366691 | -0.311073  | 0.758788  | 2.33912   | 1.70303  | 2.02571  | 0.0557146  | 0.389909   | -0.408025  |
| 1 | Shmt1     | 0 | 0.232887   | -0.372694 | 0.592628   | 1.44907   | 2.43012   | 2.70723  | 0.826347 | 0.181386   | 0.0804087  | 0.883212   |

|   |          |   |            |            |            |            |           |           |           |            |           |            |
|---|----------|---|------------|------------|------------|------------|-----------|-----------|-----------|------------|-----------|------------|
| 1 | Shmt2    | 0 | -0.397368  | -1.04774   | -0.355513  | 2.02311    | 1.83218   | 0.641724  | 0.388255  | -0.603687  | 0.0725287 | -0.732911  |
| 1 | Siah1b   | 0 | -1.08934   | -0.234332  | -0.592371  | -0.656849  | 1.33252   | -1.20696  | -0.912007 | -2.58902   | -0.823583 | -1.78545   |
| 1 | Siglech  | 0 | -0.0856245 | -0.105697  | -0.351138  | -1.23359   | 2.41811   | 0.997722  | 1.62499   | 0.606494   | 0.261196  | 0.0427166  |
| 1 | Sipa1    | 0 | -0.0557037 | -0.413224  | 0.0392876  | 0.570391   | 2.90725   | 1.83775   | 1.42445   | 0.44852    | 0.53771   | 0.0073782  |
| 1 | Six6     | 0 | 0.896539   | -0.618429  | 0.846422   | 0.180332   | 1.68503   | 0.663816  | -0.64828  | 1.05947    | 2.44364   | 1.93829    |
| 1 | Sla      | 0 | -0.732591  | -0.450327  | -0.20982   | 1.20403    | 1.79592   | 1.1965    | 1.52253   | -0.1845    | -0.426715 | -1.09525   |
| 1 | Slamf9   | 0 | -0.527519  | -0.683563  | -0.178436  | 1.02228    | 2.05742   | 2.03462   | 1.85687   | 0.903985   | 0.839453  | 0.262517   |
| 1 | Slc13a3  | 0 | 0.161883   | -0.473047  | -0.582353  | -0.054542  | 2.71169   | 0.997154  | 1.59222   | 0.926177   | 1.48465   | 0.881201   |
| 1 | Slc14a2  | 0 | 0.740615   | -0.456155  | -0.580858  | 0.265341   | 2.0148    | 1.46615   | 1.32852   | 1.52865    | 2.00976   | 2.07384    |
| 1 | Slc16a3  | 0 | -0.251174  | -0.735631  | 0.365509   | 0.86413    | 2.30154   | 1.77857   | 1.59299   | 0.273657   | 0.293999  | -0.661515  |
| 1 | Slc22a2  | 0 | -1.1117    | -0.708092  | -0.06378   | 0.789441   | 2.18142   | 0.627529  | 1.73776   | 0.0362619  | 1.33755   | 0.432278   |
| 1 | Slc22a8  | 0 | -1.10734   | -1.95938   | -2.23647   | -0.76896   | 0.675533  | 0.0281254 | 0.522646  | 0.0932766  | 0.507236  | -0.0217153 |
| 1 | Slc25a10 | 0 | 0.087931   | -1.6997    | -0.464889  | 0.0770239  | 1.77665   | 1.72868   | 0.809059  | 0.469863   | 0.201505  | -0.586473  |
| 1 | Slc25a45 | 0 | 0.844086   | 0.06288    | 0.257653   | 0.871798   | 2.46833   | 2.58259   | 2.57765   | 1.2203     | 1.51232   | 0.397937   |
| 1 | Slc26a10 | 0 | -0.943053  | -1.22753   | -0.871396  | -0.429767  | 0.25786   | -2.11173  | -1.75095  | -3.12269   | -0.717357 | -0.202023  |
| 1 | Slc2a5   | 0 | -0.560571  | -1.27328   | -2.8571    | -2.27341   | -0.128226 | -0.282643 | 0.458235  | -0.550886  | -1.1705   | -0.377021  |
| 1 | Slc31a2  | 0 | -0.115859  | -0.221422  | 0.197889   | 0.890843   | 2.56648   | 2.15525   | 2.09533   | 0.797153   | 1.34128   | 0.251312   |
| 1 | Slc39a1  | 0 | 0.0642755  | 0.0635184  | 0.400089   | 1.52291    | 3.101     | 1.64865   | 1.33603   | 0.339654   | 0.374815  | -0.148582  |
| 1 | Slc39a8  | 0 | 0.174741   | 0.0824227  | -0.0207888 | 0.35482    | 2.91828   | 2.29344   | 1.28387   | 0.595194   | 1.14828   | 0.1149     |
| 1 | Slc46a1  | 0 | -0.7821    | -1.08741   | -0.922642  | -0.955933  | 1.2901    | 1.70551   | 0.0526978 | 0.145548   | -1.07017  | -1.1913    |
| 1 | Slc52a3  | 0 | 0.502647   | -0.943482  | -0.531821  | 2.17946    | 1.73297   | 1.27877   | 0.939921  | 0.19146    | 0.795803  | -0.630585  |
| 1 | Slc7a7   | 0 | -0.118285  | 0.114781   | 0.128509   | 0.89974    | 2.41345   | 2.44073   | 2.34638   | 1.27662    | 1.0141    | 0.516915   |
| 1 | Slco2b1  | 0 | -0.299713  | -0.0054812 | -0.268453  | 0.352768   | 2.02395   | 2.19501   | 2.33274   | 0.853751   | 0.602687  | 0.176674   |
| 1 | Slfn9    | 0 | 0.100689   | -0.0595824 | 0.285091   | 0.832951   | 2.27357   | 2.37433   | 2.2392    | 0.653198   | 0.506793  | -0.219944  |
| 1 | Smagp    | 0 | -0.811191  | 0.490726   | -0.18412   | 0.899757   | 2.46248   | 2.15083   | 1.78711   | 0.815022   | 0.516593  | 1.04268    |
| 1 | Smarcd2  | 0 | 0.0775597  | 0.490047   | 1.04966    | 1.36435    | 2.28435   | 2.68917   | 2.19788   | 0.718166   | 0.924157  | -0.323304  |
| 1 | Smc2     | 0 | -0.0725746 | -0.0631495 | -0.206948  | 0.486009   | 3.18332   | 1.68015   | 0.786098  | 0.489384   | 0.501362  | 0.155796   |
| 1 | Smc4     | 0 | 0.128567   | 0.101747   | 0.319766   | 0.541795   | 3.30882   | 1.75541   | 0.987808  | 0.544026   | 0.714472  | -0.112639  |
| 1 | Smtn     | 0 | 1.78376    | 1.33543    | 1.31846    | 1.44143    | 3.90029   | 2.59812   | 1.70611   | 1.3498     | 1.18187   | 0.763349   |
| 1 | Sncg     | 0 | 0.976468   | -0.179897  | 0.954251   | 1.29539    | 2.75427   | 1.2044    | 0.88857   | 1.86176    | 2.68661   | 2.48305    |
| 1 | Sntn     | 0 | -0.750843  | -0.854029  | -0.525319  | -0.0558672 | 2.41475   | 0.337173  | 1.12214   | 0.455232   | 1.53262   | 0.511862   |
| 1 | Snx20    | 0 | 0.452798   | 0.30498    | 0.789507   | 0.999054   | 2.55824   | 2.28571   | 2.55805   | 1.39384    | 1.66806   | -0.170767  |
| 1 | Snx8     | 0 | 0.621822   | 0.711836   | 0.625127   | 0.850047   | 3.52736   | 1.56914   | 1.88791   | 0.157928   | 0.843219  | 0.383323   |
| 1 | Sox4     | 0 | 0.391709   | 0.247506   | 0.217732   | 0.86805    | 3.20019   | 1.52745   | 0.628399  | -0.0543354 | 0.104308  | -0.380106  |
| 1 | Sp110    | 0 | 0.287836   | 0.217987   | 0.424774   | 1.00068    | 2.6395    | 2.42123   | 2.62064   | 1.26215    | 1.40615   | 0.484504   |
| 1 | Spaca6   | 0 | -0.877353  | -1.7629    | -1.31556   | 0.248627   | 0.465748  | -0.418074 | -1.47244  | -1.154     | -1.16683  | -3.00237   |
| 1 | Spag17   | 0 | 0.634741   | -0.523359  | -0.367615  | 0.504774   | 2.20168   | 1.59565   | 1.74817   | 1.36364    | 2.14792   | 1.78907    |
| 1 | Sparc    | 0 | 0.604562   | 0.585973   | 0.759975   | 1.0395     | 3.29264   | 2.19667   | 1.3136    | 0.25869    | 0.719791  | -0.0991672 |

|   |         |   |            |            |            |            |          |          |            |            |            |            |
|---|---------|---|------------|------------|------------|------------|----------|----------|------------|------------|------------|------------|
| 1 | Spc25   | 0 | 0.149981   | -0.0830642 | 0.0289611  | 0.882836   | 2.81061  | 2.17997  | 1.5242     | 0.52784    | 0.618098   | -0.194636  |
| 1 | Spi1    | 0 | -0.613214  | 0.159812   | 0.295606   | 1.15407    | 2.22787  | 2.16836  | 2.09451    | 0.957013   | 0.937406   | -0.178502  |
| 1 | Spidr   | 0 | 0.809353   | 0.849966   | 0.89336    | 2.12507    | 2.70806  | 3.07213  | 2.93607    | 1.28409    | 1.48661    | 1.16259    |
| 1 | Spp1    | 0 | -0.0274714 | 0.219292   | 0.395512   | 1.60786    | 2.53022  | 2.35205  | 2.2427     | 1.38932    | 1.54351    | 0.204875   |
| 1 | Spsb2   | 0 | 0.864754   | 0.697432   | 0.492359   | 1.57952    | 3.63476  | 2.30836  | 1.98599    | 1.43768    | 1.65852    | 0.978026   |
| 1 | Ssc5d   | 0 | 0.215512   | -0.146482  | -0.14103   | 0.210887   | 2.36571  | 2.21617  | 2.06683    | 0.597116   | 0.848495   | -0.108917  |
| 1 | St6gal1 | 0 | -0.215041  | 0.35513    | 0.438542   | 0.431839   | 2.32672  | 2.49266  | 2.52534    | 0.9591     | 0.997109   | 0.607841   |
| 1 | Stab1   | 0 | -0.186705  | -0.0997173 | 0.0390175  | 0.610431   | 2.08606  | 2.60249  | 1.72832    | 0.395233   | 0.414608   | -0.236922  |
| 1 | Stag3   | 0 | -0.0482406 | 0.828628   | 0.570819   | 1.05512    | 2.84666  | 2.30018  | 1.70065    | 1.2607     | 0.778611   | -0.406148  |
| 1 | Stat2   | 0 | 0.170325   | -0.33292   | 0.206364   | 0.332226   | 0.571305 | 1.7864   | 2.28288    | -0.598057  | -0.482638  | -1.06593   |
| 1 | Stat6   | 0 | 0.193957   | -0.246546  | -0.0447745 | 0.331866   | 1.94804  | 2.31771  | 2.51975    | 0.727768   | 0.815865   | 0.183198   |
| 1 | Steap3  | 0 | -0.342057  | -0.33033   | -0.222352  | 1.2641     | 2.11113  | 1.60021  | 2.3478     | 0.91122    | 1.22873    | 0.0454383  |
| 1 | Stra6l  | 0 | -0.0778385 | 0.123918   | -1.43336   | 0.540091   | 1.54473  | 1.83198  | 1.76143    | 1.22407    | 1.43832    | 0.449021   |
| 1 | Stx2    | 0 | -0.563191  | -0.427007  | 0.254004   | 0.270567   | 1.57521  | 2.8267   | 1.41901    | 0.0450641  | 0.481838   | 0.250817   |
| 1 | Susd3   | 0 | -1.33953   | -0.546162  | -1.00101   | -0.0743139 | 1.92378  | 1.19708  | 1.2601     | -0.139995  | 0.431272   | -0.369076  |
| 1 | Syk     | 0 | -0.281514  | -0.239309  | -0.255585  | 0.691758   | 1.85994  | 2.04914  | 2.33851    | 0.970135   | 1.23465    | -0.0587135 |
| 1 | Syngnr2 | 0 | 0.18993    | -0.0445558 | 0.402125   | 1.30767    | 2.86309  | 2.27105  | 2.19712    | 1.29677    | 1.13289    | 0.468884   |
| 1 | Syt15   | 0 | -0.617309  | 0.296971   | -0.106846  | 0.705025   | 2.59809  | 2.3436   | 1.38553    | 0.963775   | 0.786439   | 0.267085   |
| 1 | Tacc3   | 0 | 0.197103   | 0.0188436  | 0.628848   | 0.567195   | 3.30364  | 2.10579  | 0.943274   | 0.499081   | 0.351129   | 0.616035   |
| 1 | Tagln   | 0 | 0.607974   | 0.158414   | 0.785556   | 1.55958    | 3.26443  | 2.36099  | 2.15699    | 1.67914    | 2.0592     | 1.30408    |
| 1 | Tap1    | 0 | -0.444456  | -0.379812  | 0.320596   | 1.18047    | 2.08508  | 1.87656  | 2.60787    | 0.873345   | 1.05856    | 0.728589   |
| 1 | Tap2    | 0 | 0.307076   | -0.289478  | 0.156426   | 1.39909    | 2.35321  | 1.97016  | 2.77389    | 1.07298    | 1.44178    | 1.03016    |
| 1 | Tapbp   | 0 | 0.0323898  | -0.250937  | -0.0527559 | 0.649676   | 1.93755  | 2.30527  | 2.57362    | 0.807844   | 1.11038    | 0.399196   |
| 1 | Tax1bp3 | 0 | 0.102394   | 0.573513   | 0.764304   | 1.35499    | 3.14377  | 2.24218  | 1.96378    | 0.944798   | 1.346      | 0.0786373  |
| 1 | Tbx2    | 0 | -1.2131    | -0.8709    | 0.0522194  | 0.675055   | 2.08587  | 1.55797  | -0.0249738 | -0.765443  | -0.0157636 | -0.279101  |
| 1 | Tbxas1  | 0 | -0.063047  | 0.48973    | 0.207498   | 0.660271   | 2.55689  | 2.32532  | 2.39715    | 1.34053    | 1.2611     | 0.247795   |
| 1 | Tcea3   | 0 | 0.198682   | 0.532311   | -1.17207   | 0.559154   | 1.97903  | 1.25313  | 1.86331    | 1.41455    | 2.17751    | 1.09878    |
| 1 | Tcf7l1  | 0 | -0.646977  | 0.0437184  | -0.166985  | 0.642985   | 2.38076  | 2.30508  | 1.39059    | 0.210229   | 0.732357   | 0.0323982  |
| 1 | Tcigr1  | 0 | -0.35503   | -0.816373  | -0.509869  | 0.187201   | 1.84306  | 1.95689  | 1.70294    | 0.565119   | 0.584054   | -0.414148  |
| 1 | Tcn2    | 0 | -0.0127299 | -0.0890093 | 0.115056   | -0.0292852 | 2.11508  | 2.41538  | 2.23213    | 0.786699   | 0.777814   | 0.191944   |
| 1 | Tead2   | 0 | 0.0999343  | -0.41328   | 0.0809195  | 1.51396    | 2.76741  | 2.06874  | 1.67685    | 0.404535   | 0.974242   | 0.634628   |
| 1 | Tep1    | 0 | 0.221957   | -0.142466  | 0.146515   | 0.79028    | 2.43516  | 2.38921  | 2.39665    | 1.12485    | 1.43639    | 0.571938   |
| 1 | Tfeb    | 0 | -0.487967  | 0.168852   | -0.224088  | 1.38779    | 2.56359  | 2.28297  | 1.61258    | 1.10805    | 0.854181   | 0.963374   |
| 1 | Tgfa    | 0 | -0.553324  | -0.284335  | 0.306253   | 2.27606    | 2.13766  | 1.33661  | 1.05698    | -0.0898696 | -0.210311  | -0.0523999 |
| 1 | Tgfb1   | 0 | 0.0469692  | 0.206162   | 0.445871   | 1.10603    | 2.52257  | 2.42698  | 2.51235    | 1.20714    | 1.12748    | 0.283368   |
| 1 | Tgfb1   | 0 | 0.182522   | 0.478917   | 1.14325    | 2.05255    | 3.26876  | 2.13466  | 2.23817    | 1.2021     | 1.62824    | 0.767385   |
| 1 | Tgif1   | 0 | 0.450447   | 1.16863    | 1.14849    | 1.99411    | 2.8636   | 2.7293   | 2.7657     | 1.29179    | 1.40946    | 0.426425   |
| 1 | Them6   | 0 | -0.457994  | -1.67911   | -1.2077    | -2.25332   | 0.34479  | -2.07423 | -1.95991   | -2.46891   | -2.56751   | -1.47986   |

|   |           |   |            |            |            |           |           |            |           |           |            |           |
|---|-----------|---|------------|------------|------------|-----------|-----------|------------|-----------|-----------|------------|-----------|
| 1 | Themis2   | 0 | 0.372756   | -0.690507  | 0.352529   | 0.906317  | 1.8297    | 2.0487     | 2.57518   | 1.05278   | 1.44441    | 0.0209469 |
| 1 | Thpo      | 0 | -0.176084  | -1.09244   | -0.511059  | -0.550137 | -0.518612 | -1.79699   | -2.4613   | -2.28078  | -2.5942    | -2.28794  |
| 1 | Ticam1    | 0 | 1.49285    | 0.974493   | 0.691648   | 1.61474   | 3.37915   | 2.30842    | 3.01546   | 1.32469   | 1.62165    | 0.913564  |
| 1 | Tie1      | 0 | -0.104088  | -0.625911  | -0.512996  | 0.729558  | 2.85714   | 1.71456    | 0.745038  | 0.662238  | 0.641441   | 0.450003  |
| 1 | Tifab     | 0 | -0.237567  | -0.966391  | -0.749612  | 0.543955  | 1.92349   | 1.59811    | 1.91155   | 0.988594  | 0.566961   | 0.305483  |
| 1 | Timm22    | 0 | -1.33207   | -1.09789   | -1.06273   | -0.954832 | 0.226905  | -1.71873   | -2.99699  | -1.79726  | -1.2574    | 0.478621  |
| 1 | Tln1      | 0 | 0.0270479  | -0.0388514 | 0.272696   | 1.18771   | 2.27492   | 2.54624    | 2.50639   | 1.22987   | 1.20398    | 0.680483  |
| 1 | Tlr7      | 0 | 0.657438   | 0.931381   | 0.539113   | 1.16616   | 2.35482   | 2.80287    | 2.82843   | 1.49151   | 1.08446    | 0.123913  |
| 1 | Tmbim7    | 0 | 0.612892   | 0.0614581  | 0.0986047  | 0.182361  | 1.49845   | -0.88858   | -1.14565  | -1.69852  | -1.163     | -1.56625  |
| 1 | Tmc6      | 0 | -0.0446432 | 0.245053   | 0.0936961  | 0.659483  | 3.00726   | 1.9532     | 1.94455   | 0.589226  | 1.59973    | 0.786263  |
| 1 | Tmco6     | 0 | -1.21425   | -2.57379   | -1.70895   | -0.417082 | 0.491028  | -0.0333568 | -0.629432 | -0.765311 | -0.216068  | 0.961673  |
| 1 | Tmed3     | 0 | -0.214062  | -0.23221   | -0.544929  | 0.336192  | 2.77535   | 1.74012    | 1.51286   | 0.592635  | 0.94898    | 0.72143   |
| 1 | Tmem104   | 0 | -0.105635  | -0.26858   | -0.59897   | 0.355587  | 2.0816    | 2.3378     | 1.80808   | 0.480318  | 0.302261   | 0.263588  |
| 1 | Tmem106a  | 0 | -0.163969  | -0.435295  | -0.0620291 | 0.683138  | 2.03778   | 2.20584    | 2.15459   | 1.09836   | 1.36556    | 0.166371  |
| 1 | Tmem119   | 0 | -0.0402107 | -0.728702  | -0.878841  | -0.561176 | 1.92955   | 1.92525    | 1.38764   | 0.215444  | -0.0339455 | 0.212116  |
| 1 | Tmem125   | 0 | 0.586567   | 0.237284   | 0.951773   | 1.90013   | 3.73613   | 1.75046    | 1.27302   | 1.20462   | 1.07559    | 1.24793   |
| 1 | Tmem143   | 0 | 0.0040423  | -1.31507   | -1.17199   | -1.236    | -1.32998  | -1.02967   | -1.87129  | -1.38366  | -1.61389   | -3.76955  |
| 1 | Tmem150a  | 0 | -0.414998  | 0.0346147  | 0.160911   | 0.806068  | 2.87107   | 1.68929    | 2.0357    | 0.428287  | 1.08151    | 0.516832  |
| 1 | Tmem173   | 0 | -0.354403  | -0.363994  | 0.189932   | 1.07149   | 2.32667   | 1.99402    | 2.30849   | 0.645811  | 1.0873     | 0.457758  |
| 1 | Tmem176a  | 0 | 0.102777   | -0.182353  | 0.143629   | 1.40499   | 3.02585   | 1.91298    | 1.97085   | 1.10701   | 1.18489    | 0.923158  |
| 1 | Tmem176b  | 0 | 0.175612   | 0.0452146  | 0.382559   | 1.4531    | 3.06023   | 1.97123    | 2.20377   | 1.209     | 1.51578    | 0.644468  |
| 1 | Tmem179b  | 0 | -0.052042  | -0.741063  | -0.173903  | 0.797753  | 2.82911   | 1.63783    | 1.18929   | 0.263064  | 0.543739   | 0.0773634 |
| 1 | Tmem198b  | 0 | 0.162421   | 0.2676     | 0.565814   | 0.996995  | 2.5417    | 2.70384    | 1.48254   | 0.0756512 | 0.784536   | -0.179967 |
| 1 | Tmem203   | 0 | 0.179757   | -2.64109   | -1.01159   | -0.26254  | 0.619442  | -0.290828  | 0.0826012 | -1.96295  | -1.39794   | -0.359716 |
| 1 | Tmem37    | 0 | -1.2675    | 0.230015   | 0.306488   | 0.958019  | 2.41523   | 1.72197    | 1.69916   | 1.09959   | 0.451566   | 0.585139  |
| 1 | Tmem51    | 0 | -0.364611  | -0.0129696 | -0.941316  | 0.714211  | 2.28658   | 1.28397    | 1.77153   | 1.00845   | 1.68594    | 0.38117   |
| 1 | Tmem71    | 0 | -0.194042  | -0.765742  | 0.420623   | -0.254101 | 2.36645   | 1.91335    | 1.63611   | 1.0059    | 1.28276    | 0.553232  |
| 1 | Tmem86a   | 0 | 0.0390775  | -0.577721  | -0.501648  | -0.008187 | 1.97929   | 2.11858    | 2.02904   | 0.646414  | 0.518096   | 0.29071   |
| 1 | Tmem98    | 0 | -0.122838  | -0.716293  | -0.477933  | 0.740035  | 2.01574   | 1.76876    | 1.80559   | 1.248     | 1.76942    | 0.8725    |
| 1 | Tmie      | 0 | 1.15909    | 0.747726   | 0.874846   | 1.21027   | 3.43337   | 1.44667    | 1.82694   | 1.76638   | 2.92332    | 2.39335   |
| 1 | Tmsb4x    | 0 | 0.0113604  | 0.0160751  | -0.248628  | 0.362867  | 3.09687   | 1.81713    | 0.88041   | 0.403416  | 0.408776   | 0.0433293 |
| 1 | Tnfaip8   | 0 | 0.180211   | 0.169633   | 0.432792   | 1.10746   | 2.90375   | 2.28189    | 2.32427   | 1.21507   | 1.70994    | 0.683243  |
| 1 | Tnfaip8l2 | 0 | -0.502041  | -0.849157  | -0.421383  | 0.264304  | 2.03729   | 1.70417    | 1.68851   | 0.819518  | 0.880604   | -0.241408 |
| 1 | Tnfrsf13c | 0 | 1.4103     | 0.982128   | 0.181273   | 0.697195  | 2.56443   | -0.488046  | -0.368993 | -0.496297 | 1.70888    | 0.102054  |
| 1 | Tnfrsf1b  | 0 | -0.106227  | 0.278576   | 0.384885   | 0.914701  | 2.42834   | 2.2443     | 2.37361   | 1.14241   | 1.38105    | -0.108974 |
| 1 | Tnfsf12   | 0 | -0.548272  | -0.274062  | -1.16323   | -0.706761 | 2.15075   | 1.46854    | 0.986221  | 0.282527  | 0.175112   | -0.480653 |
| 1 | Tnfsf13   | 0 | 0.292644   | -0.0281971 | -0.517189  | -0.606859 | 2.12658   | 1.8934     | 1.58062   | 0.625905  | 1.83098    | 0.373771  |
| 1 | Tnfsf13b  | 0 | 0.864526   | 0.674387   | 0.600457   | 0.857125  | 3.06324   | 2.52395    | 2.70421   | 1.30943   | 2.10491    | 1.81231   |

|   |          |   |            |            |           |           |          |           |           |           |           |            |
|---|----------|---|------------|------------|-----------|-----------|----------|-----------|-----------|-----------|-----------|------------|
| 1 | Tnni2    | 0 | 0.0695651  | 0.864487   | 1.03418   | 0.681277  | 2.82859  | 2.33782   | 2.63634   | 2.11492   | 1.01675   | 0.841184   |
| 1 | Top2a    | 0 | 0.107778   | 0.0200247  | 0.24695   | 0.336615  | 2.79294  | 2.24789   | 1.44226   | 0.578519  | 0.358612  | -0.250775  |
| 1 | Tpcn2    | 0 | -0.0299983 | 0.441079   | 0.13877   | 1.01998   | 2.14371  | 1.67281   | 1.62092   | 0.774395  | 0.80795   | -1.45067   |
| 1 | Tpgs1    | 0 | -0.879147  | -1.9293    | -2.91513  | -0.70329  | 0.903958 | -0.961576 | -1.22105  | -1.26332  | -1.3833   | -0.303451  |
| 1 | Tpp1     | 0 | -0.257322  | -0.486312  | -0.406547 | -0.474723 | 1.24082  | 2.08738   | 1.81986   | 0.514053  | 0.12491   | -0.889731  |
| 1 | Tpt1     | 0 | 0.842028   | 0.965789   | 1.16972   | 1.37412   | 3.87311  | 2.48062   | 2.07937   | 1.57045   | 1.8247    | 1.53248    |
| 1 | Tpx2     | 0 | -0.218509  | -0.447665  | -0.260574 | 0.0978524 | 2.63585  | 1.69929   | 0.66025   | -0.173939 | -0.268181 | -0.497541  |
| 1 | Traf3ip3 | 0 | -1.01986   | -0.203372  | -0.991093 | -0.134046 | 1.72809  | 1.43951   | 1.85007   | 0.733597  | 0.569892  | -0.0121891 |
| 1 | Trf      | 0 | 0.292917   | 0.349575   | 0.418757  | 2.1522    | 3.32208  | 1.91517   | 1.93362   | 1.31847   | 1.32324   | 1.15382    |
| 1 | Trim12c  | 0 | 0.540518   | -0.0900352 | 0.325701  | 0.674463  | 2.64595  | 2.07254   | 2.6608    | 1.27195   | 1.4882    | 0.527246   |
| 1 | Trim14   | 0 | -0.838646  | -0.433166  | -0.934421 | 0.171342  | 0.929806 | 1.564     | 1.98741   | 0.25234   | 0.149481  | -1.07106   |
| 1 | Trim47   | 0 | -0.294285  | 0.0777672  | 0.873237  | 2.03772   | 2.87541  | 1.84092   | 1.53704   | 0.120474  | 1.30846   | 0.912872   |
| 1 | Trim56   | 0 | 0.360767   | 1.22682    | 1.09237   | 1.7786    | 3.37093  | 2.03458   | 2.81925   | 1.10261   | 1.6647    | 0.847446   |
| 1 | Tspan4   | 0 | -0.0627119 | 0.278495   | 0.216743  | 2.13205   | 2.57859  | 2.11338   | 2.0971    | 0.956377  | 0.484733  | 0.490253   |
| 1 | Tspo     | 0 | -0.286153  | -0.0334329 | 0.0098434 | 0.737149  | 2.90424  | 1.87881   | 1.79278   | 0.510725  | 1.29297   | 0.738032   |
| 1 | Ttc7     | 0 | -0.433226  | -0.703057  | -0.24233  | -0.648667 | 1.7781   | 1.94351   | 1.65621   | -0.105984 | 0.401074  | -0.222774  |
| 1 | Ttf2     | 0 | -0.508124  | -0.977612  | -0.115859 | 1.34134   | 1.54075  | 2.01347   | 1.9901    | 0.70661   | 0.796571  | 0.426465   |
| 1 | Ttk      | 0 | 0.059401   | 0.437593   | -0.174307 | 0.396248  | 2.29787  | 1.88779   | 1.19174   | 0.198651  | 0.0290384 | -1.27643   |
| 1 | Tyk2     | 0 | 0.0216864  | 0.215856   | -0.24501  | 0.721725  | 2.86239  | 1.87152   | 1.46932   | 0.126354  | 0.404977  | -0.242205  |
| 1 | Tyms     | 0 | 0.125722   | -0.740173  | 0.241016  | -0.451207 | 1.59234  | -0.270532 | -0.413309 | -1.43538  | -1.43122  | -2.11317   |
| 1 | Tyrbp    | 0 | 0.0422105  | 0.0965344  | 0.0935034 | 0.682347  | 2.2261   | 2.44646   | 2.35327   | 1.58065   | 1.42143   | 0.359395   |
| 1 | Uap1l1   | 0 | 0.0335553  | 0.01723    | -0.008622 | 0.82406   | 2.53423  | 2.35033   | 2.23255   | 0.803843  | 0.967362  | 0.380388   |
| 1 | Uba7     | 0 | 0.19976    | -0.292339  | -0.421426 | 0.475944  | 2.12554  | 2.24274   | 2.19202   | 1.26646   | 1.00819   | 0.370274   |
| 1 | Ube2c    | 0 | 0.395996   | 0.48997    | 0.872153  | 0.953441  | 3.26465  | 2.15988   | 1.0944    | 0.206215  | 0.410793  | -0.0095305 |
| 1 | Ube2l6   | 0 | -0.459765  | -0.322303  | -0.423031 | 0.394041  | 1.92221  | 1.82706   | 2.32851   | 0.576807  | 0.940546  | 0.122901   |
| 1 | Ucp2     | 0 | 0.389261   | 0.609861   | 0.587466  | 1.55021   | 3.02703  | 2.7287    | 2.1108    | 0.733643  | 0.947764  | 0.677169   |
| 1 | Ugt1a7c  | 0 | -0.301251  | -0.557228  | -0.38766  | 0.187493  | 1.86297  | 2.06925   | 1.91416   | 1.02909   | 0.895705  | -0.168668  |
| 1 | Uhrf1    | 0 | -0.442923  | 0.229673   | 0.181287  | 1.28928   | 2.76518  | 2.09527   | 1.14427   | 0.551304  | 0.318337  | -0.191379  |
| 1 | Unc13d   | 0 | 0.3554     | -0.726722  | -1.08197  | 0.068162  | 1.42597  | 1.50659   | 2.40972   | 0.614477  | 0.563998  | 0.561867   |
| 1 | Ung      | 0 | 2.37177    | 1.10574    | 0.952679  | 1.07492   | 2.35527  | 0.662503  | 0.377285  | -1.16096  | 0.320366  | 0.726947   |
| 1 | Usp2     | 0 | -0.57285   | -1.30506   | -1.64627  | -1.92036  | 0.316097 | -1.84698  | -1.93643  | -2.21908  | -3.1005   | -1.59096   |
| 1 | Usp43    | 0 | -0.939751  | -1.33595   | -1.42845  | -0.441975 | -1.66707 | -1.6683   | -2.21448  | -2.64145  | -2.24799  | -3.52253   |
| 1 | Vamp8    | 0 | 0.514943   | 0.368852   | 1.04721   | 1.13686   | 3.18965  | 2.50573   | 2.56673   | 1.60772   | 1.88452   | 1.53634    |
| 1 | Vasp     | 0 | 0.734423   | 0.0719139  | 0.790293  | 1.75751   | 2.6531   | 2.53421   | 2.38701   | 0.713412  | 1.38547   | 0.189929   |
| 1 | Vat1     | 0 | 0.376132   | 0.181519   | 0.158529  | 0.839388  | 2.76486  | 2.18024   | 2.45788   | 1.33487   | 1.99164   | 1.20396    |
| 1 | Vav1     | 0 | -0.173325  | 0.112455   | 0.440467  | 1.17891   | 2.54657  | 2.33317   | 2.32493   | 1.21181   | 1.10549   | 0.277833   |
| 1 | Vim      | 0 | 0.0951657  | 0.529775   | 0.745418  | 1.75097   | 2.92194  | 2.61254   | 2.23064   | 1.51227   | 1.71221   | 0.712946   |
| 1 | Vkorc1   | 0 | -0.0625771 | -0.0106189 | 0.374924  | 0.46892   | 2.72969  | 2.52919   | 1.84449   | 0.823039  | 1.13863   | 0.676787   |

|   |               |   |            |            |            |            |            |           |           |           |            |            |
|---|---------------|---|------------|------------|------------|------------|------------|-----------|-----------|-----------|------------|------------|
| 1 | Vmn1r65       | 0 | 0.584553   | 0.0955594  | 0.151436   | -0.0818314 | 2.03941    | -0.863345 | -0.58136  | -1.59723  | -0.957204  | -1.19879   |
| 1 | Vwf           | 0 | -0.141421  | -0.0493954 | 0.38232    | 1.43959    | 2.81291    | 2.34136   | 1.60823   | 0.848983  | 0.797487   | 0.261164   |
| 1 | Was           | 0 | 0.653737   | 1.24987    | 1.11917    | 0.982022   | 2.99271    | 2.11797   | 2.60472   | 0.751399  | 0.540777   | -0.0427207 |
| 1 | Wasf2         | 0 | 0.141429   | 0.658265   | 0.792116   | 1.64545    | 2.70575    | 2.76612   | 2.60692   | 1.03945   | 1.31846    | 0.772154   |
| 1 | Wdfy4         | 0 | -0.484705  | -0.647877  | -0.179039  | 0.362093   | 1.64708    | 2.06211   | 2.17974   | 0.935679  | 0.791942   | -0.0031908 |
| 1 | Wdr62         | 0 | -0.0268461 | -0.716795  | 0.0809809  | 0.687235   | 2.74992    | 2.13538   | 1.23938   | 0.609133  | 0.986056   | 0.717448   |
| 1 | Xlr           | 0 | 0.001555   | -0.119032  | 0.65456    | 1.12627    | 2.53542    | 2.52183   | 2.28158   | 1.45736   | 1.34534    | 0.608928   |
| 1 | Ybey          | 0 | 0.361781   | -0.0207346 | -0.0470606 | 0.126491   | 1.17021    | -1.38361  | -1.45478  | -1.5392   | -1.32126   | -1.90261   |
| 1 | Yif1a         | 0 | 0.625121   | 0.310179   | 0.483213   | 2.41469    | 3.42206    | 1.01351   | 1.26313   | 0.710242  | 0.852633   | 0.648043   |
| 1 | Zeb2os        | 0 | -0.287257  | 0.21089    | -0.255741  | 0.664476   | 2.74533    | 1.96221   | 1.83994   | 1.18252   | 0.953619   | 0.226216   |
| 1 | Zfp575        | 0 | -0.822299  | -2.43833   | -2.34336   | -0.950618  | -1.23804   | -3.05724  | -2.63051  | -2.13547  | -3.11275   | -1.98275   |
| 1 | Zfp764        | 0 | -1.4384    | -2.34376   | -0.443913  | -1.02912   | 1.06097    | 0.527654  | 0.524054  | -0.149675 | -0.123951  | 0.492274   |
| 1 | Zfp771        | 0 | 0.0388142  | -0.979664  | -2.29635   | -0.12496   | -0.22034   | -0.598562 | -0.280287 | -0.828206 | 0.625555   | 1.72423    |
| 1 | Zfp85         | 0 | -1.76237   | -2.6949    | -0.808859  | -0.367945  | -0.055229  | 0.125908  | -0.139985 | 0.403873  | 0.349882   | 0.536825   |
| 1 | Zfp865        | 0 | -1.05606   | -2.90657   | -2.30975   | -1.26545   | 0.556892   | -1.0098   | -0.597269 | -0.934624 | -1.88987   | -1.79885   |
| 1 | Zic4          | 0 | 0.528546   | 0.24691    | 0.355161   | 0.683249   | 2.99069    | 2.17155   | 1.87642   | 1.50936   | 2.44689    | 1.45304    |
| 1 | Zmynd10       | 0 | 0.697438   | -0.299159  | -0.64909   | -2.09917   | 1.16616    | 0.51727   | 0.610872  | 1.22443   | 1.09652    | 0.895724   |
| 1 | Znf41-ps      | 0 | 1.52884    | 1.29629    | 0.568136   | 1.98068    | 2.93867    | 2.94579   | 2.90487   | 2.3937    | 1.37865    | 2.55197    |
| 1 | Zwilch        | 0 | 0.264159   | 0.0293072  | -0.0596012 | 0.506745   | 2.66898    | 2.24643   | 1.05629   | -0.450766 | -0.0433043 | 0.399414   |
| 2 | 1700001L19Rik | 0 | -0.464123  | 0.162724   | -0.931306  | -1.52325   | -0.0802675 | -1.1858   | -1.30521  | -0.195907 | -0.0620998 | 2.12192    |
| 2 | 1700030J22Rik | 0 | -0.830728  | -0.302353  | 0.163874   | -1.16494   | -2.6439    | -2.51284  | -1.65452  | -0.996031 | -1.8552    | 0.0044936  |
| 2 | 2810032G03Rik | 0 | -0.320267  | -0.0063022 | -1.36466   | -2.76449   | -1.79372   | -2.35304  | -2.4383   | -2.11137  | -1.9282    | -0.974271  |
| 2 | 2900055J20Rik | 0 | -0.100789  | -0.800365  | -1.25591   | -1.30125   | -0.0465613 | -3.32659  | -1.90062  | -1.52627  | -0.369321  | -0.563251  |
| 2 | 4930429B21Rik | 0 | 0.4615     | -0.434933  | -0.747695  | -1.42054   | -2.78968   | -2.15715  | -1.80098  | -1.99892  | -1.92032   | -1.54776   |
| 2 | 4930452N14Rik | 0 | -0.256894  | -0.328839  | -0.680339  | -0.345356  | -0.106031  | -1.55554  | -2.93394  | -2.5774   | -1.2099    | -0.691142  |
| 2 | 4931440F15Rik | 0 | -0.455412  | -0.217424  | -1.29389   | -1.24784   | -0.556092  | -2.91046  | -2.9777   | -1.10642  | -1.95017   | -1.36653   |
| 2 | 6530402F18Rik | 0 | -0.598397  | -0.580459  | -0.681184  | -2.18775   | -2.78884   | -2.95397  | -1.30963  | -1.48578  | -2.53643   | -1.24727   |
| 2 | A230103J11Rik | 0 | -1.44326   | -1.83618   | -0.978806  | -0.974163  | -3.8192    | -1.62011  | -2.54907  | -2.49438  | -2.01496   | -2.07577   |
| 2 | A730017L22Rik | 0 | 0.220175   | -1.03716   | -0.799635  | -0.899744  | -0.867927  | -2.98341  | -2.06355  | -2.67263  | -1.4297    | -1.45419   |
| 2 | Abhd8         | 0 | -0.460322  | -1.641     | -2.11271   | -0.853761  | -1.65082   | -2.75939  | -3.47667  | -2.08227  | -2.17591   | -1.52818   |
| 2 | Ackr2         | 0 | -0.307861  | -2.30561   | -1.20207   | -0.87679   | -3.03673   | -0.460608 | -2.05542  | -1.24062  | -2.6336    | -1.85384   |
| 2 | Acot5         | 0 | -0.441083  | -0.842153  | -1.87216   | -0.4317    | -2.23223   | -3.43327  | -0.678705 | -1.16754  | -1.25007   | -0.494943  |
| 2 | Actn2         | 0 | -0.931082  | -0.845131  | -1.65315   | -2.60926   | -3.5634    | -1.67177  | -1.16891  | -0.801271 | -1.24065   | -0.499945  |
| 2 | Actr3b        | 0 | -0.513282  | -0.467985  | -1.00174   | -2.21976   | -3.4746    | -2.33835  | -1.49229  | -0.899953 | -1.39859   | -1.0247    |
| 2 | Acvr1c        | 0 | -0.078881  | -0.448167  | -0.243452  | -1.94568   | -2.33356   | -2.64497  | -2.13583  | -1.69127  | -1.89257   | -0.601903  |
| 2 | Adamts17      | 0 | -1.46937   | -1.79373   | -1.57848   | -2.69513   | -3.38828   | -2.30446  | -2.36573  | -2.4309   | -2.83828   | -3.5872    |
| 2 | Adcy5         | 0 | -0.952361  | -1.15874   | -1.65677   | -2.80021   | -3.76887   | -1.62453  | -1.16889  | -1.27417  | -1.22086   | -1.03212   |
| 2 | Adora2a       | 0 | -1.28385   | -1.64993   | -2.12248   | -2.88203   | -3.56072   | -1.22842  | -1.1933   | -1.22996  | -0.958344  | -0.717514  |

|   |               |   |            |            |           |            |           |            |            |            |            |           |
|---|---------------|---|------------|------------|-----------|------------|-----------|------------|------------|------------|------------|-----------|
| 2 | Adra2c        | 0 | -1.46815   | -2.10469   | -2.56545  | -3.71271   | -2.34793  | -2.85728   | -2.69694   | -2.64039   | -2.07488   | -1.04874  |
| 2 | AI593442      | 0 | -1.31854   | -1.65183   | -2.13018  | -2.17496   | -3.35487  | -2.013     | -1.74805   | -1.27994   | -1.52259   | 0.245123  |
| 2 | Akap5         | 0 | 0.242746   | -0.0310357 | -0.896158 | -1.75689   | -3.13214  | -0.591965  | -0.191633  | -0.0167431 | -0.325738  | -0.161644 |
| 2 | Alkbh4        | 0 | -2.01593   | -1.8181    | -1.17747  | -1.97924   | -1.16624  | -3.27962   | -2.83987   | -2.6851    | -2.63765   | -3.19725  |
| 2 | Amy2a5        | 0 | 1.09958    | 0.338328   | 1.27287   | 0.766789   | -0.410317 | 0.715206   | -0.0748386 | 0.130301   | -0.0717254 | 3.18678   |
| 2 | Ankrd34a      | 0 | -0.947112  | -1.47721   | -1.77134  | -1.58501   | -1.87725  | -3.09023   | -3.20506   | -1.73431   | -2.39361   | -0.369885 |
| 2 | Ankrd34c      | 0 | -2.32562   | -0.835578  | -1.37678  | -0.570688  | -3.40056  | -2.89888   | -1.54884   | -1.15121   | -1.81319   | -1.37758  |
| 2 | Ankrd63       | 0 | -0.302876  | -1.1708    | -1.26804  | -2.54056   | -3.27292  | -1.31833   | -0.712917  | -0.681983  | -0.733646  | -0.195033 |
| 2 | Arc           | 0 | 1.45647    | 1.92249    | 2.24822   | 0.355875   | -1.0823   | -0.162585  | 0.019346   | 0.370693   | 1.03641    | 1.2732    |
| 2 | Arf3          | 0 | -0.257401  | -0.530425  | -0.965862 | -2.05905   | -2.92014  | -2.64178   | -1.92121   | -1.87201   | -2.49095   | -1.88604  |
| 2 | Arhgap32      | 0 | -0.825608  | -1.00375   | -1.30175  | -1.44049   | -4.00285  | -1.98123   | -1.42039   | -1.09978   | -1.85822   | -1.00616  |
| 2 | Arhgap33      | 0 | -1.19296   | -1.49829   | -2.0712   | -2.27651   | -3.21823  | -3.30915   | -2.83967   | -2.1582    | -3.02508   | -2.72296  |
| 2 | Arl4d         | 0 | 2.36756    | 1.33725    | 0.302964  | 0.0705147  | -0.658825 | -0.790989  | -0.91248   | -0.745059  | -0.284677  | -0.107737 |
| 2 | Arpp19        | 0 | -0.51242   | -1.13747   | -1.37615  | -1.7438    | -3.65868  | -2.15456   | -2.14886   | -1.27723   | -1.80038   | -0.540141 |
| 2 | Arpp21        | 0 | -0.959925  | -0.861918  | -1.85273  | -2.46345   | -3.73614  | -2.03959   | -1.91596   | -1.22609   | -1.99768   | -0.870925 |
| 2 | Asic4         | 0 | -0.642102  | -1.14871   | -2.33129  | -2.79673   | -2.60083  | -1.74509   | -1.52454   | -0.959511  | -0.707131  | 0.163709  |
| 2 | Asphd2        | 0 | -0.43156   | -1.59863   | -1.8996   | -1.65193   | -3.3738   | -2.97351   | -2.38396   | -2.22114   | -2.54738   | -1.94189  |
| 2 | Atp2b2        | 0 | -0.114017  | -0.676313  | -0.83455  | -1.64551   | -3.58966  | -2.02117   | -1.24341   | -0.766795  | -1.66956   | -1.1462   |
| 2 | AU023762      | 0 | -0.340947  | -0.207747  | -1.25674  | -0.621893  | -2.0622   | -2.34396   | -2.43489   | -1.77599   | -2.84515   | -0.873232 |
| 2 | Baiap2        | 0 | 0.164502   | -0.238195  | -0.305633 | -1.52876   | -1.66429  | -2.10866   | -2.12104   | -1.59892   | -2.66168   | -2.07132  |
| 2 | Barx2         | 0 | -0.545706  | 0.16482    | -1.35759  | -0.841571  | -1.90056  | -1.63906   | -2.41895   | -1.4766    | -2.91248   | -0.231734 |
| 2 | BC030499      | 0 | -2.68622   | -2.13673   | -2.5377   | -2.76717   | -2.18377  | -3.06785   | -3.26726   | -3.48483   | -3.65638   | -3.10778  |
| 2 | BC031361      | 0 | -1.06059   | -0.0806035 | -0.693748 | -1.50069   | -3.53757  | -1.70139   | -2.18127   | -1.51606   | -1.58691   | -2.0136   |
| 2 | BC052040      | 0 | 0.89998    | 0.198337   | -0.18902  | 0.180413   | -0.487081 | 0.0629561  | 0.293631   | 0.467797   | 0.221128   | 3.26881   |
| 2 | Bcl11b        | 0 | -1.23036   | -1.98614   | -3.00464  | -3.2225    | -3.22058  | -3.05784   | -2.46314   | -2.25797   | -2.50686   | -1.46445  |
| 2 | Bcor          | 0 | 0.992742   | 1.72525    | 2.14658   | 0.175334   | -1.6779   | -0.0622235 | 0.515755   | 0.453888   | 0.09629    | 0.363384  |
| 2 | Btg2          | 0 | 2.48029    | 0.96197    | 0.466412  | -0.0803087 | -1.19179  | -0.593427  | 0.155671   | -0.442501  | 0.290088   | -0.865384 |
| 2 | C030034I22Rik | 0 | -1.12207   | 0.314411   | -1.85567  | -2.93917   | -0.95663  | -0.646497  | -0.928317  | -0.228901  | 0.121932   | 0.270398  |
| 2 | C730002L08Rik | 0 | -0.45237   | -1.60438   | -1.82833  | -0.822153  | -3.27158  | -2.52923   | -2.58223   | -1.14152   | -1.8168    | -0.801761 |
| 2 | Cabp1         | 0 | 0.367851   | -0.118811  | -0.230457 | -1.44892   | -1.53442  | -2.3688    | -2.4731    | -1.55815   | -2.05723   | -1.09004  |
| 2 | Cacna1i       | 0 | -0.0756614 | -0.637472  | -1.01461  | -1.46897   | -3.26966  | -2.73515   | -1.62554   | -1.75166   | -1.69719   | -1.28732  |
| 2 | Cacna2d3      | 0 | -0.386039  | -0.173168  | -1.03391  | -1.87401   | -3.5412   | -1.2167    | -0.72981   | -0.377102  | -0.7222    | -0.624599 |
| 2 | Cacng3        | 0 | -0.278041  | -0.612388  | -1.50732  | -1.65846   | -3.54729  | -2.28646   | -1.554     | -1.1545    | -2.21427   | -1.40761  |
| 2 | Caln1         | 0 | -1.03639   | -0.833682  | -2.0544   | -1.86115   | -3.95873  | -2.4316    | -1.49225   | -1.50012   | -1.75849   | -1.47153  |
| 2 | Camk2a        | 0 | -0.455232  | -0.639304  | -0.973612 | -2.31394   | -1.94587  | -2.87678   | -2.61455   | -1.88955   | -2.71183   | -2.13744  |
| 2 | Camk2n1       | 0 | -0.319255  | -0.175888  | -0.670414 | -1.39117   | -1.61123  | -2.63116   | -2.58209   | -2.07548   | -2.27287   | -2.23311  |
| 2 | Camk4         | 0 | -0.527484  | -0.447245  | -1.05666  | -2.44511   | -3.52351  | -2.02104   | -1.61644   | -1.12725   | -1.73547   | -1.19937  |
| 2 | Camkk2        | 0 | -0.379012  | -1.10366   | -1.35901  | -2.57796   | -3.16136  | -2.81811   | -2.10016   | -1.64594   | -2.48291   | -1.76311  |



|   |               |   |           |           |           |           |           |           |           |           |            |            |
|---|---------------|---|-----------|-----------|-----------|-----------|-----------|-----------|-----------|-----------|------------|------------|
| 2 | Car11         | 0 | -0.929995 | -1.78571  | -2.47677  | -2.8284   | -1.61554  | -3.28262  | -3.22246  | -1.93203  | -2.77804   | -1.80605   |
| 2 | Car7          | 0 | 0.0150886 | -0.739279 | 0.0757625 | -0.896966 | -0.894694 | -2.36413  | -2.44896  | -1.85938  | -2.159     | -2.08965   |
| 2 | Ccdc85c       | 0 | -0.988463 | -1.61862  | -2.72537  | -1.31143  | -3.15265  | -2.00922  | -2.22534  | -1.57509  | -0.916792  | -0.0593948 |
| 2 | Cd4           | 0 | -0.975057 | -1.17364  | -1.84186  | -3.41916  | -2.74029  | -0.757747 | -0.432494 | -1.11509  | -0.807916  | -1.2043    |
| 2 | Cdk5r2        | 0 | -0.519828 | -1.514    | -2.34637  | -2.36532  | -1.83033  | -3.3945   | -2.79476  | -2.34971  | -2.47682   | -1.31143   |
| 2 | Cdr1          | 0 | 0.843757  | -0.131341 | -0.34952  | -0.104155 | -0.253248 | -1.1983   | -1.41217  | -0.557067 | -0.738191  | 2.24444    |
| 2 | Cecr6         | 0 | -1.32088  | -2.08385  | -2.72259  | -2.567    | -3.97276  | -2.50276  | -2.51253  | -1.60118  | -2.67064   | -1.95172   |
| 2 | Chn1          | 0 | -0.315544 | -0.58477  | -1.21374  | -2.09424  | -3.49225  | -1.45238  | -1.21755  | -0.407072 | -0.926481  | -0.367419  |
| 2 | Chrm1         | 0 | -1.2407   | -1.31627  | -1.53188  | -2.13524  | -3.54024  | -3.0378   | -2.65294  | -2.04884  | -2.89676   | -2.28006   |
| 2 | Clec11a       | 0 | -0.597716 | -0.871637 | -1.55618  | -3.21967  | -1.36755  | -2.49647  | -1.55929  | -1.73465  | -0.0617676 | -2.21054   |
| 2 | Cnih2         | 0 | -0.582476 | -1.10592  | -1.65603  | -1.99649  | -0.789425 | -2.76992  | -3.00691  | -2.27086  | -2.31812   | -2.72633   |
| 2 | Coch          | 0 | -1.45634  | -0.61273  | -1.18747  | -2.10727  | -3.8641   | -2.07648  | -1.2478   | -0.905814 | -1.36015   | -1.08916   |
| 2 | Col19a1       | 0 | -0.598407 | -0.636414 | -1.36341  | -2.24276  | -3.53943  | -2.01128  | -2.19477  | -1.31397  | -1.83104   | -0.742714  |
| 2 | Col24a1       | 0 | -0.556736 | -1.2219   | -0.961304 | -2.46198  | -0.752235 | -2.14956  | -3.32972  | -1.51754  | -2.62762   | -1.55641   |
| 2 | Cort          | 0 | -0.964581 | -0.610609 | -2.86579  | -1.5559   | -0.558127 | -2.10245  | -2.47409  | -1.28027  | -1.03647   | 0.340629   |
| 2 | Cplx3         | 0 | 0.368496  | 0.556017  | 0.0724552 | -0.713701 | -2.31757  | -1.62515  | -1.63369  | -0.989983 | -2.08743   | -0.660194  |
| 2 | Cpne5         | 0 | -0.527074 | -1.23137  | -0.743798 | -2.08502  | -3.02372  | -2.90678  | -2.45816  | -1.87747  | -2.21751   | -1.0692    |
| 2 | Cpne7         | 0 | -0.53238  | 0.137506  | -1.166    | -1.66912  | -0.477459 | -2.4038   | -2.7572   | -1.70541  | -1.06792   | -2.42624   |
| 2 | Ctxn1         | 0 | -0.7044   | -0.819232 | -1.53187  | -2.47666  | -1.67122  | -2.73134  | -3.10041  | -2.37369  | -2.83384   | -2.15741   |
| 2 | Cx3cl1        | 0 | -0.443515 | -1.60043  | -2.28771  | -2.39713  | -3.1384   | -3.03225  | -2.44618  | -1.96062  | -2.73362   | -2.2951    |
| 2 | Cyp2s1        | 0 | -0.59312  | -2.25692  | -1.25771  | -2.32194  | -3.81516  | -2.13795  | -2.26566  | -1.7461   | -2.06802   | -1.54428   |
| 2 | Cyp46a1       | 0 | -0.821164 | -0.934097 | -1.3179   | -2.60461  | -2.27606  | -2.89472  | -2.69092  | -1.99472  | -2.95598   | -2.66366   |
| 2 | D430036J16Rik | 0 | -0.578277 | -0.769385 | -2.28988  | -2.08216  | -3.02647  | -1.04709  | -0.904195 | -0.574104 | -0.559389  | 0.214565   |
| 2 | Dach1         | 0 | -1.34712  | -1.62858  | -1.97974  | -2.29388  | -2.48903  | -0.773785 | -1.33002  | -0.437024 | -0.572783  | 0.755809   |
| 2 | Dact2         | 0 | -2.33333  | -3.35846  | -3.59305  | -3.1475   | -3.10184  | -2.39018  | -1.97346  | -2.28136  | -2.62764   | -1.62903   |
| 2 | Dact3         | 0 | -0.62282  | -1.11699  | -2.10017  | -2.26282  | -1.88236  | -3.0121   | -3.06752  | -2.19099  | -1.97792   | -0.608472  |
| 2 | Dapl1         | 0 | -1.25242  | -1.79231  | -1.51871  | -2.56665  | -0.35076  | -2.36135  | -3.52179  | -1.20266  | -1.01234   | -1.71396   |
| 2 | Dazl          | 0 | -1.17138  | -0.797001 | -1.43983  | -0.85515  | -3.45826  | -2.76741  | -1.99235  | -1.77231  | -1.64925   | -0.525916  |
| 2 | Ddn           | 0 | -0.898116 | -1.0822   | -1.44688  | -2.44747  | -3.74156  | -2.61882  | -2.41515  | -1.76858  | -2.08259   | -1.72954   |
| 2 | Dhcr24        | 0 | 0.150233  | -0.394095 | -0.125901 | 0.0552529 | -1.78871  | -2.39097  | -2.13505  | -1.55672  | -1.72712   | -0.0835236 |
| 2 | Diras2        | 0 | -0.434315 | -0.814143 | -1.19934  | -2.10134  | -3.68096  | -1.98101  | -1.41971  | -0.949026 | -1.37165   | -0.662927  |
| 2 | Dlg2          | 0 | -0.576443 | -0.430771 | -1.0411   | -1.4438   | -3.69075  | -2.08684  | -1.51957  | -0.848329 | -1.26345   | -0.66447   |
| 2 | Dlgap3        | 0 | -1.04278  | -1.81313  | -2.67336  | -2.44241  | -2.96325  | -3.22806  | -3.11684  | -2.57677  | -3.12889   | -2.27269   |
| 2 | Dph1          | 0 | -0.71151  | -1.56086  | -2.01519  | -0.96636  | -3.36756  | -1.61536  | -1.89134  | -0.843856 | -3.08458   | -1.29035   |
| 2 | Drd2          | 0 | -0.748899 | -1.35956  | -2.36114  | -2.67789  | -3.23183  | -1.1991   | -0.777478 | -0.77861  | -0.923404  | -0.552954  |
| 2 | Dusp1         | 0 | 1.53897   | 0.0741435 | -0.935632 | -0.381009 | -2.40743  | -1.09091  | -0.819073 | -1.03147  | -0.0921467 | 0.244078   |
| 2 | E130012A19Rik | 0 | -0.428287 | -0.59873  | -1.52682  | -1.38844  | -0.357754 | -2.27655  | -2.94335  | -2.09525  | -2.58694   | -0.833565  |
| 2 | Efna3         | 0 | 0.0683568 | -0.245771 | -0.787396 | -1.4833   | -3.02856  | -2.5384   | -1.39944  | -1.64505  | -1.07143   | -0.547601  |

|   |          |   |            |            |            |            |            |           |           |           |           |           |
|---|----------|---|------------|------------|------------|------------|------------|-----------|-----------|-----------|-----------|-----------|
| 2 | Egr1     | 0 | 1.12475    | 1.48171    | 1.0967     | -0.592337  | -1.77976   | -0.957181 | -0.480048 | 0.0649876 | 0.108732  | 0.856276  |
| 2 | Egr3     | 0 | 0.429606   | -0.14019   | -0.581608  | -1.85729   | -3.16104   | -1.49118  | -1.19218  | -0.625178 | -1.23972  | -0.562812 |
| 2 | Egr4     | 0 | 1.05637    | -0.354228  | -1.46824   | -1.90134   | -1.26785   | -1.65633  | -1.63522  | -1.04662  | -0.494438 | 0.717503  |
| 2 | Ephx4    | 0 | -0.373142  | -0.630261  | -0.981479  | -1.58502   | -3.26206   | -2.32472  | -2.49648  | -1.38282  | -2.21395  | -1.1155   |
| 2 | Fam163b  | 0 | -0.551844  | -1.10746   | -1.14789   | -1.19181   | -1.31633   | -2.30993  | -2.19633  | -1.6677   | -1.22229  | 1.23763   |
| 2 | Fam184b  | 0 | -1.38943   | -2.02928   | -2.46219   | -3.07065   | -2.9636    | -1.80759  | -1.72859  | -0.674902 | -0.674939 | -0.778644 |
| 2 | Fam189a1 | 0 | -0.624917  | -0.636858  | -1.3559    | -1.22499   | -3.66612   | -2.4329   | -1.97597  | -1.28214  | -1.98851  | -1.79897  |
| 2 | Fam189b  | 0 | -1.44826   | -2.29312   | -2.51469   | -1.99541   | -3.63941   | -3.12315  | -3.42376  | -2.09796  | -2.15397  | -2.52305  |
| 2 | Fam19a1  | 0 | -0.680476  | -1.08054   | -2.74722   | -2.64478   | -3.16877   | -2.23766  | -1.82947  | -1.16858  | -1.39386  | -0.723329 |
| 2 | Fam19a2  | 0 | -0.636147  | -0.723885  | -1.38499   | -1.50033   | -3.87673   | -2.2022   | -1.86347  | -1.3122   | -1.5595   | -1.21742  |
| 2 | Fam78a   | 0 | -0.843798  | -2.62314   | -2.14835   | -3.90988   | -2.58855   | -1.76054  | -1.79828  | -2.03257  | -2.31729  | -2.25727  |
| 2 | Fbxl16   | 0 | -0.859065  | -1.4113    | -1.62885   | -2.49153   | -3.26412   | -2.96636  | -2.57179  | -1.90738  | -2.74551  | -1.20566  |
| 2 | Fbxl18   | 0 | -1.18192   | -2.29772   | -2.04433   | -1.24112   | -3.95643   | -2.65428  | -1.62984  | -2.47747  | -2.18999  | -1.82597  |
| 2 | Fgf5     | 0 | 0.619811   | 1.53373    | 1.05392    | -0.639932  | -1.17739   | -1.29918  | -1.46911  | -0.637014 | -0.710678 | 0.341671  |
| 2 | Fibcd1   | 0 | -0.35861   | -0.4892    | -1.37651   | -2.04511   | -1.03245   | -2.65686  | -1.41508  | -0.453935 | 0.98893   | -0.635753 |
| 2 | Fosb     | 0 | 2.2718     | 1.49491    | 0.836283   | -0.061949  | -0.815008  | -0.741975 | -0.615516 | -0.424997 | -0.194388 | 0.833963  |
| 2 | Fosl2    | 0 | 2.25638    | 0.995602   | 0.366107   | 0.318189   | -0.80286   | -1.28043  | -0.88788  | -0.733008 | -0.230856 | 0.145556  |
| 2 | Foxb1    | 0 | 1.59159    | 0.319732   | 1.86968    | -0.72531   | 0.751677   | 0.441577  | 0.54075   | 1.44123   | 2.87413   | 1.42736   |
| 2 | Frzb     | 0 | 0.186061   | -0.444348  | -0.828808  | -2.0778    | -1.01299   | -2.82025  | -2.42637  | -1.6372   | -1.99691  | -1.86203  |
| 2 | Fstl4    | 0 | -0.409005  | -1.24876   | -1.04275   | -1.73352   | -3.11693   | -2.89356  | -2.29096  | -2.53278  | -2.26783  | -1.54945  |
| 2 | Gabrd    | 0 | -0.0697067 | -0.0953859 | 0.149478   | -2.15031   | -0.650156  | -2.2895   | -2.25635  | -1.48651  | -2.07552  | -1.09925  |
| 2 | Gdf10    | 0 | 0.758608   | 0.0752828  | -0.0421957 | -0.335312  | -1.34186   | -1.9908   | -2.35425  | 0.010289  | 0.0314859 | 0.351986  |
| 2 | Gm11549  | 0 | 0.634777   | -0.254875  | 0.0136772  | -0.459573  | -2.66273   | -1.38086  | -1.65183  | -0.972251 | -2.06071  | -0.490461 |
| 2 | Gm11627  | 0 | 1.14345    | 1.07192    | 1.10563    | -0.656079  | -2.30964   | -0.191081 | -0.588834 | -0.14384  | -0.463573 | -0.322945 |
| 2 | Gm12992  | 0 | -0.113792  | -0.804233  | -0.513234  | -1.36988   | -3.48102   | -1.8785   | -1.05682  | -0.540503 | -0.834696 | -1.91696  |
| 2 | Gm14827  | 0 | -0.612285  | -1.8808    | -1.41306   | -2.34264   | -1.21773   | -2.21386  | -3.31815  | -2.24872  | -2.17107  | -3.14046  |
| 2 | Gm1976   | 0 | -0.606297  | -1.12593   | -0.763036  | -2.03917   | -0.0701695 | -2.25714  | -3.08059  | -2.07952  | -2.22498  | -1.67484  |
| 2 | Gm7334   | 0 | 1.41377    | 2.29691    | -0.29786   | 1.23271    | -0.492321  | 0.123983  | -0.564641 | 0.92508   | 0.0267338 | 1.89673   |
| 2 | Gm7337   | 0 | 0.138685   | -0.552277  | -0.432858  | -0.536029  | -1.25034   | -1.51602  | -2.74488  | -1.74067  | -1.10009  | 0.855481  |
| 2 | Gng7     | 0 | -1.46856   | -1.57802   | -1.92007   | -2.9455    | -3.93467   | -1.96312  | -1.55565  | -1.59076  | -1.64404  | -1.04826  |
| 2 | Gpr12    | 0 | -2.06434   | -1.30136   | -2.696     | -2.54083   | -3.08816   | -3.50072  | -2.80326  | -2.11501  | -2.09775  | -1.11384  |
| 2 | Gpr173   | 0 | -0.137343  | 0.169681   | -0.305081  | -0.0256878 | -1.57732   | -1.02841  | -1.10155  | -0.787864 | -0.137965 | 2.26022   |
| 2 | Gpr25    | 0 | -1.02597   | -0.898307  | -1.38355   | -1.31233   | -2.40222   | -2.92765  | -3.32493  | -1.65181  | -2.43227  | -0.926047 |
| 2 | Gpr26    | 0 | -0.304068  | -0.39754   | -1.56192   | -1.47407   | -3.57523   | -1.8485   | -0.806093 | -0.901634 | -0.887183 | -0.427424 |
| 2 | Gpr27    | 0 | -1.1262    | -1.78406   | -3.15413   | -0.845884  | -2.62839   | -2.61456  | -2.85945  | -1.38622  | -1.61341  | -0.815375 |
| 2 | Gpr88    | 0 | -1.12063   | -1.5233    | -2.47579   | -2.93428   | -3.48731   | -1.35075  | -1.49873  | -1.09741  | -1.22211  | -0.807588 |
| 2 | Grasp    | 0 | 0.571377   | 0.155257   | -0.412313  | -1.74209   | -1.74084   | -2.13097  | -2.05019  | -1.46562  | -2.10399  | -1.23339  |
| 2 | Grik5    | 0 | -0.564533  | -1.06545   | -1.44514   | -0.791248  | -1.43126   | -1.77187  | -1.3658   | -1.27162  | -0.829146 | 1.83291   |

|   |         |   |            |            |           |            |            |          |           |           |           |            |
|---|---------|---|------------|------------|-----------|------------|------------|----------|-----------|-----------|-----------|------------|
| 2 | Grm4    | 0 | 0.467823   | -0.360222  | -0.566436 | -1.1817    | -0.0618283 | -2.14413 | -2.1438   | -1.71264  | -2.18132  | -1.93566   |
| 2 | Grp     | 0 | -0.865387  | -0.707382  | -2.63886  | -2.57384   | -3.0825    | -2.47925 | -1.96526  | -1.23096  | -0.692281 | -1.76069   |
| 2 | Gsg1l   | 0 | -0.16326   | -0.0754071 | -0.358404 | -1.8261    | -3.14205   | -1.67928 | -1.42322  | -1.52827  | -2.16497  | -1.01817   |
| 2 | Hkdc1   | 0 | -0.510369  | -0.924683  | -0.674489 | -0.862729  | -3.23725   | -2.7199  | -0.997303 | -1.50121  | -2.28258  | -1.77319   |
| 2 | Homer1  | 0 | -0.0289902 | -0.447701  | -0.900776 | -1.17679   | -2.61908   | -1.66782 | -1.31349  | -0.514938 | -0.85957  | 1.2251     |
| 2 | Hpca    | 0 | -1.00189   | -1.19534   | -1.43119  | -2.92558   | -3.30395   | -2.86241 | -2.83668  | -1.85691  | -2.05641  | -2.14715   |
| 2 | Hrk     | 0 | -0.676686  | -0.112758  | -0.213239 | -1.08994   | -2.53102   | -2.13447 | -2.11196  | -2.16323  | -2.37291  | -2.10843   |
| 2 | Hs3st2  | 0 | -0.276436  | -1.36892   | -2.05308  | -1.38115   | -3.03813   | -2.73834 | -2.28081  | -1.89233  | -2.82471  | -1.19917   |
| 2 | Hs6st3  | 0 | -0.933294  | -0.0381619 | -1.82946  | -1.84468   | -3.44677   | -2.3282  | -0.70857  | -1.27029  | -1.21066  | -1.50574   |
| 2 | Htr1d   | 0 | -0.708348  | -2.0723    | -2.25588  | -1.94511   | -3.50792   | -2.75268 | -3.10791  | -2.05193  | -2.50884  | -1.97885   |
| 2 | Htr2a   | 0 | 0.0022298  | -0.398209  | -0.718367 | -0.587604  | -3.59682   | -1.11454 | -1.68803  | -0.890874 | -1.36408  | -0.87912   |
| 2 | Icam5   | 0 | -1.52008   | -2.29876   | -3.30104  | -3.31783   | -3.38068   | -2.88323 | -2.88669  | -2.13453  | -2.75083  | -1.98069   |
| 2 | Inha    | 0 | -0.679972  | -1.37715   | -3.20454  | -1.748     | -1.97757   | -2.21283 | -3.42029  | -2.27562  | -2.35568  | -2.32546   |
| 2 | Itpka   | 0 | -0.800673  | -0.785033  | -1.26525  | -3.09468   | -3.25769   | -2.1976  | -1.74819  | -1.04375  | -1.87957  | -1.05556   |
| 2 | Itp1    | 0 | -0.385604  | -0.328698  | -0.534501 | -1.69577   | -3.62928   | -1.47187 | -1.02266  | -0.791375 | -1.27366  | -0.497449  |
| 2 | Junb    | 0 | 2.98501    | 0.511801   | -0.449777 | 0.9354     | -0.194932  | 0.265494 | 0.80133   | 0.0343846 | 1.16379   | 1.80454    |
| 2 | Kcnab1  | 0 | -0.889373  | -0.954518  | -1.54646  | -2.08984   | -3.72021   | -1.64735 | -1.24097  | -0.70963  | -0.682555 | -0.503001  |
| 2 | Kcnb1   | 0 | 0.112872   | -0.580552  | -0.64922  | -1.5606    | -2.48995   | -2.51616 | -2.27231  | -1.70115  | -2.43569  | -1.79185   |
| 2 | Kcne4   | 0 | 2.70705    | 1.56124    | 1.81962   | 0.564114   | -0.707841  | 0.550543 | 0.112386  | -0.311653 | 0.383215  | 0.741389   |
| 2 | Kcnh3   | 0 | -0.452946  | -1.01063   | -1.33531  | -2.09156   | -2.51482   | -2.94669 | -2.57264  | -1.73348  | -3.05981  | -1.90012   |
| 2 | Kcnh4   | 0 | -0.449216  | -0.52123   | -0.773009 | -1.77054   | -3.68907   | -1.92992 | -1.59617  | -1.29922  | -1.46921  | -0.790306  |
| 2 | Kcnip2  | 0 | -0.425202  | -0.958786  | -2.02474  | -3.59046   | -2.10507   | -2.45978 | -1.99393  | -1.15452  | -1.70987  | -1.21729   |
| 2 | Kcnj4   | 0 | -0.19888   | -0.861485  | -1.06804  | -1.90637   | -1.77203   | -2.92708 | -2.49587  | -1.72015  | -1.88685  | -0.0004732 |
| 2 | Kcnk4   | 0 | -0.171853  | -1.04325   | -1.9695   | -1.36597   | -2.2729    | -2.30199 | -3.41185  | -1.81895  | -2.40483  | -1.48566   |
| 2 | Kcnq3   | 0 | -0.429462  | -0.0861196 | -1.07871  | -1.30102   | -3.37022   | -1.47689 | -0.410366 | -0.292014 | -0.794006 | 0.157839   |
| 2 | Kcnq5   | 0 | -0.474762  | -0.758623  | -1.12778  | -1.60434   | -3.7394    | -1.28417 | -0.685743 | -0.442764 | -0.668329 | -0.562953  |
| 2 | Kcns2   | 0 | -0.36077   | -0.57717   | -0.400823 | -1.76274   | -3.46263   | -2.08867 | -1.74727  | -0.884817 | -1.50744  | -0.843522  |
| 2 | Kcnv1   | 0 | -0.951836  | -2.02896   | -2.55969  | -2.19515   | -3.79011   | -2.11565 | -1.80204  | -1.07169  | -2.17996  | -1.07889   |
| 2 | Kirrel2 | 0 | 0.814438   | 0.502157   | 0.549782  | -0.626612  | -1.86538   | -1.80027 | -1.55622  | -0.871716 | -1.59187  | -0.989138  |
| 2 | Klhl3   | 0 | -0.0337805 | -0.251483  | -0.367002 | -0.63504   | -3.49948   | -1.34044 | -0.728691 | -0.820839 | -1.32754  | -1.63841   |
| 2 | Krt10   | 0 | -1.29163   | -1.37175   | -2.28978  | -2.31744   | -0.718531  | -1.631   | -2.35679  | -0.342657 | 0.177783  | 0.152808   |
| 2 | Krt12   | 0 | -0.729122  | -0.901475  | -1.39048  | -2.3314    | -1.5869    | -2.85258 | -1.99152  | -2.03597  | -2.43766  | 0.193066   |
| 2 | Ky      | 0 | -0.53432   | -0.537603  | -0.551285 | -2.97865   | -2.91777   | -1.86347 | -1.2995   | -1.0824   | -0.409077 | -0.968172  |
| 2 | Lamp5   | 0 | 0.142729   | -0.584906  | -1.32187  | -2.46624   | -2.86819   | -1.70202 | -1.18851  | -0.509886 | -1.1565   | 0.0113897  |
| 2 | Lgi2    | 0 | -0.723014  | -0.285989  | -1.01701  | -1.28033   | -3.39207   | -2.63716 | -1.36746  | -0.859511 | -1.58355  | -0.629423  |
| 2 | Lhx2    | 0 | -0.455676  | -0.242396  | -0.872624 | -1.86709   | -1.98718   | -2.64278 | -3.06635  | -1.91765  | -2.10622  | -1.39491   |
| 2 | Lin28b  | 0 | -0.0968247 | 0.399967   | 1.47905   | -0.0661313 | -2.22135   | -1.05716 | -1.48779  | -1.08055  | -0.201324 | -0.218777  |
| 2 | Lingo1  | 0 | -0.808698  | -1.39677   | -1.84744  | -2.23917   | -3.25287   | -3.14165 | -2.77462  | -1.96785  | -2.80912  | -2.14491   |

|   |             |   |           |            |            |            |           |           |           |           |           |            |
|---|-------------|---|-----------|------------|------------|------------|-----------|-----------|-----------|-----------|-----------|------------|
| 2 | Lingo3      | 0 | -1.38751  | -0.907621  | -1.51363   | -2.89443   | -3.54021  | -2.81035  | -2.32456  | -2.10191  | -2.35717  | -1.61228   |
| 2 | Lipg        | 0 | 0.483301  | 0.615192   | 0.492999   | -0.810142  | -1.99161  | -2.10225  | -1.50204  | -0.751616 | -1.51111  | -0.794783  |
| 2 | Lmo3        | 0 | -0.540817 | -0.38073   | -0.871946  | -1.07368   | -3.66411  | -1.96837  | -1.66152  | -1.15589  | -1.9888   | -1.28556   |
| 2 | Lmo7        | 0 | -0.833308 | -0.841708  | -1.61452   | -1.68763   | -3.9033   | -1.30347  | -1.06573  | -0.771004 | -1.14681  | -0.5748    |
| 2 | Lmtk2       | 0 | -0.5015   | -0.796456  | -1.02735   | -1.22151   | -3.91938  | -1.94004  | -1.3639   | -1.10065  | -1.42817  | -1.19641   |
| 2 | LOC432842   | 0 | -1.34507  | -1.28185   | -2.4183    | -1.51783   | -3.2149   | -3.47444  | -2.28277  | -1.45266  | -2.78894  | -1.94542   |
| 2 | Lpcat4      | 0 | -0.853319 | -2.53443   | -2.35302   | -2.00527   | -3.19426  | -3.27979  | -2.82591  | -1.61425  | -2.39666  | -1.49938   |
| 2 | Lrrc10b     | 0 | -1.11618  | -1.49166   | -2.14864   | -3.67754   | -3.41101  | -2.22484  | -2.16231  | -2.00818  | -2.0136   | -1.76305   |
| 2 | Lrrtm1      | 0 | -2.39315  | -2.57539   | -2.35498   | -1.24137   | -2.40066  | -3.3335   | -3.50393  | -1.94868  | -2.51535  | -3.19819   |
| 2 | Lrrtm3      | 0 | -1.01481  | -2.77511   | -2.88649   | -2.23357   | -2.7356   | -1.33368  | -1.07327  | -0.344001 | -1.26435  | -0.951373  |
| 2 | Lzts1       | 0 | -0.560628 | -0.870055  | -0.791451  | -1.03352   | -3.85292  | -1.74178  | -0.971705 | -0.834204 | -1.45362  | -0.668877  |
| 2 | Mal2        | 0 | -0.669657 | -0.279773  | -1.01774   | -1.7246    | -3.58593  | -2.23048  | -2.09253  | -1.32533  | -1.48607  | -1.1917    |
| 2 | Map3k13     | 0 | -1.10126  | -1.13697   | -1.08273   | -1.55226   | -3.93157  | -2.26973  | -1.25987  | -0.915618 | -0.939767 | -1.04083   |
| 2 | Mapk11      | 0 | -0.244894 | 0.0630151  | -0.397429  | -1.50217   | -2.02193  | -2.5159   | -2.21999  | -1.78847  | -2.40399  | -1.74834   |
| 2 | Mas1        | 0 | -0.15225  | -0.459173  | -0.994272  | -1.94988   | -3.22614  | -2.46351  | -1.56799  | -0.538949 | -1.4112   | -1.50682   |
| 2 | Mchr1       | 0 | 0.254324  | -0.0970026 | -0.788599  | -1.62016   | -2.97086  | -2.19115  | -1.89976  | -1.01101  | -1.47792  | -0.753517  |
| 2 | Miat        | 0 | -0.785435 | -1.44599   | -1.48482   | -2.0359    | -2.26657  | -2.57854  | -3.19973  | -2.6695   | -2.58534  | -3.14843   |
| 2 | Mir124a-1hg | 0 | -1.58697  | -1.91932   | -1.4012    | -1.63285   | -1.80147  | -2.82311  | -3.50555  | -2.69988  | -3.06984  | -2.94069   |
| 2 | Mirg        | 0 | -0.291617 | -1.04075   | -0.291827  | -0.831864  | -0.475164 | -1.93303  | -3.41162  | -1.35916  | -2.05209  | -1.41148   |
| 2 | Mlip        | 0 | 0.397333  | -0.339588  | -1.29798   | -1.6833    | -2.47932  | -2.0626   | -2.37378  | -0.849493 | -0.960739 | -0.0655823 |
| 2 | Mn1         | 0 | 0.234397  | -1.08877   | -1.01185   | -1.68843   | -3.15725  | -2.5088   | -1.90239  | -1.40071  | -1.73024  | -0.791189  |
| 2 | Myl4        | 0 | -0.116358 | -0.38897   | -0.0688882 | -1.60341   | -0.296201 | -1.79418  | -1.39747  | -1.30836  | -3.22029  | -0.43572   |
| 2 | Myom3       | 0 | -2.86791  | -1.52113   | -0.522095  | -2.5125    | -1.40666  | -1.73275  | -0.80494  | -1.14344  | -2.50531  | 0.0585994  |
| 2 | Ndst4       | 0 | -0.395515 | -0.759082  | -0.584011  | -0.0933158 | -2.53033  | -3.10813  | -1.76059  | -1.30151  | -1.59797  | -1.70745   |
| 2 | Necab3      | 0 | -0.380925 | -0.854257  | -1.04226   | -1.19416   | -1.29676  | -2.62473  | -2.24359  | -1.64917  | -2.97596  | -2.82238   |
| 2 | Nefl        | 0 | -0.18288  | -0.484998  | -0.965778  | -1.20456   | -2.04093  | -1.6994   | -1.20937  | -0.34322  | 0.0308757 | 1.59867    |
| 2 | Neur1a      | 0 | -0.442895 | -1.01938   | -1.1942    | -1.53489   | -2.42126  | -3.06477  | -2.84685  | -1.95774  | -2.69821  | -1.88611   |
| 2 | Neurod6     | 0 | -1.59747  | -2.1241    | -3.14557   | -2.25753   | -2.5415   | -2.08357  | -1.67539  | -0.246816 | -0.654124 | -0.888706  |
| 2 | Ngb         | 0 | 1.23777   | 0.568237   | 0.257473   | 0.259622   | 0.806818  | 0.126892  | -0.584937 | -0.135553 | 1.59529   | 3.01324    |
| 2 | Ngef        | 0 | -0.797246 | -0.815457  | -1.48694   | -2.30338   | -3.70342  | -2.31917  | -1.92261  | -1.50946  | -2.36405  | -1.27207   |
| 2 | Nnt         | 0 | -2.00507  | -0.535793  | -2.83525   | -3.08253   | -2.65921  | -1.8185   | -2.17449  | -2.63067  | -2.25034  | -3.06268   |
| 2 | Nog         | 0 | -1.49881  | -0.689304  | -2.42968   | -3.63251   | -1.39609  | -1.65177  | -1.77033  | -0.954136 | -0.979139 | -0.448917  |
| 2 | Npas2       | 0 | -0.702019 | -1.06044   | -1.35231   | -2.08368   | -3.67856  | -2.47841  | -2.19018  | -1.69576  | -2.31071  | -2.36086   |
| 2 | Npas4       | 0 | 1.97415   | 1.62643    | 1.55072    | -0.119662  | -0.823424 | -0.633111 | -0.529531 | -0.223425 | -0.241154 | -0.252736  |
| 2 | Npcd        | 0 | -0.257421 | 0.214976   | -0.461624  | -1.61537   | -2.56539  | -1.92948  | -1.69213  | -1.35671  | -1.96455  | 0.211848   |
| 2 | Nr4a1       | 0 | 1.91972   | 0.401493   | -0.14597   | -0.808115  | -1.26229  | -0.699132 | -0.430964 | -0.215673 | 0.765327  | 1.64413    |
| 2 | Nr4a2       | 0 | 1.06424   | 0.0994519  | -0.924662  | -1.68786   | -2.54617  | -1.72199  | -0.949645 | -0.630657 | -1.02252  | -0.274812  |
| 2 | Nr4a3       | 0 | 1.19295   | 0.537439   | -0.111979  | -0.556759  | -1.42985  | -0.542582 | -0.248482 | 0.0687064 | 0.425689  | 2.37595    |

|   |          |   |           |            |           |           |           |           |           |            |           |            |
|---|----------|---|-----------|------------|-----------|-----------|-----------|-----------|-----------|------------|-----------|------------|
| 2 | Nrgn     | 0 | -0.633138 | -1.73934   | -2.37922  | -2.86141  | -1.58476  | -2.97359  | -2.83828  | -2.15461   | -3.10359  | -2.3905    |
| 2 | Ntng2    | 0 | -0.840295 | -0.946855  | -2.1737   | -2.89389  | -3.08734  | -1.98702  | -1.76849  | -1.89874   | -3.21619  | -2.26279   |
| 2 | Obscn    | 0 | -0.22765  | -0.399233  | 0.652312  | -1.01279  | -3.02619  | -1.60836  | -1.45741  | -1.7623    | -1.2147   | -0.979867  |
| 2 | Olfr287  | 0 | -0.364617 | -0.0425579 | -0.949011 | -3.64381  | -0.857672 | -0.685419 | -0.357173 | -0.747004  | -0.570443 | -0.32546   |
| 2 | Otof     | 0 | -0.700861 | -1.14434   | -1.69897  | -3.01841  | -3.27829  | -1.78167  | -1.62946  | -0.690145  | -1.27058  | -0.658099  |
| 2 | Pak6     | 0 | -0.977404 | -0.997625  | -1.44664  | -1.43733  | -3.77145  | -2.86992  | -1.97104  | -1.69992   | -2.19089  | -1.71545   |
| 2 | Pappa2   | 0 | 0.0300975 | -0.809467  | -0.736305 | -1.49521  | -2.97772  | -0.831445 | -1.35909  | -0.998303  | -2.98849  | -1.02277   |
| 2 | Pcdha1   | 0 | 0.0257647 | 1.00811    | -0.679852 | -0.767991 | -0.584363 | -2.06769  | 0.635529  | 1.07924    | -0.765908 | 1.11791    |
| 2 | Pcdha11  | 0 | 0.823419  | -0.60909   | -1.6      | -0.623613 | -2.58076  | -1.42154  | -0.607444 | -0.0750009 | -0.244759 | 0.674071   |
| 2 | Pcdha3   | 0 | 0.0125475 | -0.881554  | -0.802044 | -0.702743 | -2.85748  | -3.0768   | -1.75737  | -1.25124   | -1.42938  | -1.21883   |
| 2 | Pcdha9   | 0 | -1.47976  | 0.496483   | -0.947216 | -1.42669  | -1.90702  | -2.8416   | -1.49704  | -0.0589729 | -1.10345  | -0.0035525 |
| 2 | Pcp4     | 0 | 0.274214  | 0.139382   | 0.267298  | -1.3277   | 0.801146  | -1.82595  | -2.31748  | -0.848834  | -1.34679  | -0.747843  |
| 2 | Pcsk9    | 0 | -0.4907   | -0.553896  | -0.907212 | -2.01459  | -3.64714  | -1.36242  | -1.23974  | -1.60783   | -1.8789   | -0.602173  |
| 2 | Pde10a   | 0 | -1.07119  | -1.23715   | -1.85533  | -2.52004  | -3.77206  | -1.43459  | -0.905694 | -1.00156   | -1.27241  | -0.75742   |
| 2 | Pde1b    | 0 | -1.30092  | -1.5951    | -2.2952   | -3.04855  | -3.56553  | -1.73369  | -1.32642  | -0.997883  | -1.44756  | -0.91938   |
| 2 | Pde7b    | 0 | -0.246823 | -0.400819  | -1.09278  | -2.02943  | -3.67345  | -1.41685  | -0.867924 | -1.04951   | -1.2493   | -1.08287   |
| 2 | Penk     | 0 | -0.525676 | -0.754684  | -1.76171  | -2.29983  | -2.65574  | -0.693339 | -0.887464 | -0.617385  | -0.479289 | 0.815955   |
| 2 | Per2     | 0 | -1.17723  | 0.525836   | -0.514525 | -1.09813  | -2.94139  | -2.02831  | -1.375    | -0.873014  | -2.20585  | -0.652123  |
| 2 | Phf24    | 0 | -0.479014 | -0.396731  | -0.829486 | -1.5869   | -3.69725  | -2.01174  | -1.39669  | -1.05353   | -1.66719  | -1.05609   |
| 2 | Pianp    | 0 | -0.61525  | -1.46126   | -2.45361  | -2.22326  | -1.0746   | -3.01746  | -3.24995  | -2.18515   | -2.30221  | -1.44154   |
| 2 | Pim2     | 0 | 0.753647  | -0.123978  | 0.0324012 | -0.374318 | -1.70599  | -1.97357  | -2.38572  | -1.50662   | -1.34642  | -0.464551  |
| 2 | Pla2g4e  | 0 | -0.734482 | -0.31044   | -1.00878  | -2.168    | -3.14982  | -2.38065  | -2.04463  | -2.51251   | -2.00649  | -2.04945   |
| 2 | Plcx3    | 0 | -0.726696 | -0.775117  | -2.20579  | -0.634689 | -1.09218  | -2.6621   | -0.212173 | 0.404916   | -0.541053 | 0.62123    |
| 2 | Plekhf1  | 0 | 2.30824   | 1.56094    | 0.941073  | 0.666127  | -0.290481 | 1.81741   | 0.622178  | -1.13942   | 0.711612  | 1.46707    |
| 2 | Ppp1r1a  | 0 | -1.25491  | -0.680315  | -1.61203  | -2.41713  | -1.56934  | -2.98223  | -3.42954  | -1.93333   | -2.63152  | -1.91368   |
| 2 | Ppp1r1b  | 0 | -1.16089  | -1.41698   | -1.54455  | -2.67896  | -3.97216  | -1.7083   | -1.73472  | -1.50186   | -1.67769  | -0.948698  |
| 2 | Prkcb    | 0 | -0.401211 | -0.187297  | -0.825265 | -2.17076  | -3.31754  | -2.26479  | -1.55247  | -1.39936   | -1.84619  | -1.37629   |
| 2 | Prkcg    | 0 | -0.461803 | -0.636542  | -0.979381 | -2.51596  | -2.67605  | -2.24585  | -2.1735   | -1.79457   | -2.67368  | -2.61074   |
| 2 | Prrt1    | 0 | -1.23431  | -2.55841   | -3.40093  | -2.28263  | -3.55345  | -2.00809  | -2.65026  | -1.72408   | -2.51283  | -2.72185   |
| 2 | Prrt2    | 0 | -0.903846 | -2.10493   | -2.3111   | -3.23715  | -2.2756   | -2.40733  | -3.57648  | -2.21139   | -2.86327  | -2.1622    |
| 2 | Psd      | 0 | -0.552374 | -1.06351   | -1.50424  | -2.04372  | -2.9074   | -3.1183   | -2.76972  | -2.25846   | -2.44979  | -2.02113   |
| 2 | Ptpn5    | 0 | -0.841655 | -1.68728   | -2.32071  | -2.82726  | -3.7737   | -2.5589   | -2.38958  | -1.80474   | -2.18426  | -1.69723   |
| 2 | R3hdm2   | 0 | -0.36283  | -0.57711   | -1.1308   | -1.14876  | -1.16821  | -1.91249  | -1.86405  | -1.40846   | -1.09265  | 1.6355     |
| 2 | Rab40b   | 0 | -1.34857  | -1.74215   | -1.68577  | -2.23562  | -4.00991  | -3.08631  | -2.08529  | -1.76222   | -1.74781  | -1.83589   |
| 2 | Rasd2    | 0 | -0.776251 | -1.40904   | -1.92191  | -2.90218  | -3.19854  | -2.55777  | -2.76341  | -2.42706   | -2.90397  | -1.79454   |
| 2 | Rasgef1c | 0 | -0.373516 | -0.169615  | -0.138785 | -1.38157  | -1.71109  | -2.84174  | -2.54651  | -1.76305   | -2.00801  | -1.3578    |
| 2 | Rasgrp2  | 0 | -0.761684 | -2.32454   | -2.23941  | -3.34514  | -3.05982  | -2.54844  | -1.93211  | -1.59747   | -1.60543  | -1.01361   |
| 2 | Rasl10b  | 0 | -0.494393 | -1.13163   | -1.75412  | -2.201    | -2.4825   | -3.28474  | -2.78291  | -2.23161   | -2.63743  | -1.74488   |

|   |           |   |            |            |            |           |            |            |           |           |           |            |
|---|-----------|---|------------|------------|------------|-----------|------------|------------|-----------|-----------|-----------|------------|
| 2 | Rbfox1    | 0 | -0.0749591 | -0.871136  | -1.30082   | -2.17089  | -1.27395   | -2.70936   | -3.05757  | -1.60097  | -2.43413  | -1.74823   |
| 2 | Rem2      | 0 | -0.326646  | -0.124954  | -0.0129471 | -2.72717  | -2.56852   | -2.031     | -1.02289  | -1.21457  | -0.584255 | -0.700376  |
| 2 | Ret       | 0 | 2.74139    | 1.92919    | 1.70154    | 1.017     | 0.243235   | -0.532979  | -0.101307 | 1.21654   | 1.60988   | 0.724753   |
| 2 | Rgs14     | 0 | -0.670325  | -1.36509   | -1.60178   | -2.58032  | -3.63261   | -2.72182   | -2.16458  | -1.40118  | -2.03544  | -2.13864   |
| 2 | Rgs4      | 0 | -0.230935  | -0.932751  | -1.73223   | -2.34596  | -3.00848   | -2.89579   | -2.38172  | -1.50558  | -2.17117  | -1.41923   |
| 2 | Rgs7bp    | 0 | 0.127817   | 0.0667305  | -0.455007  | -1.33765  | -0.229576  | -2.39487   | -1.96463  | -1.65417  | -2.36138  | -1.70977   |
| 2 | Rgs9      | 0 | -1.3199    | -1.02539   | -1.51156   | -2.87523  | -3.37679   | -1.07483   | -0.843148 | -0.924067 | -0.696065 | -0.505289  |
| 2 | Rgs11     | 0 | -0.511493  | 0.320475   | 0.0422056  | -1.504    | -1.16336   | -1.4086    | -2.42203  | -1.61992  | -2.46322  | -2.11636   |
| 2 | Rims1     | 0 | -0.0679353 | 0.240517   | 0.131582   | -0.785061 | -3.30479   | -1.37685   | -0.824685 | -0.4347   | -1.16026  | -0.609039  |
| 2 | Rnf165    | 0 | -0.537642  | -0.600298  | -1.1236    | -1.35053  | -0.843071  | -2.66318   | -2.27656  | -1.8678   | -1.74579  | 0.706665   |
| 2 | Rnf208    | 0 | -0.460334  | -1.87525   | -2.03015   | -1.50588  | -1.93492   | -3.63993   | -2.62575  | -2.66984  | -1.95319  | -1.92714   |
| 2 | Robo3     | 0 | -0.37541   | -1.13062   | -0.737828  | -2.56246  | -1.68829   | -1.27716   | -2.68988  | -1.6689   | -2.34857  | -3.07837   |
| 2 | Rpe65     | 0 | 0.356899   | 0.578373   | 1.0002     | 0.0404868 | -1.96261   | -1.19956   | -1.27492  | 0.696778  | 0.183232  | 1.06084    |
| 2 | Rpl14-ps1 | 0 | 2.68566    | 1.08891    | 2.17309    | 0.657925  | 1.07396    | 0.723008   | 0.317655  | 2.65824   | 2.12372   | 2.55689    |
| 2 | Rspo2     | 0 | -2.16606   | -1.40816   | -2.67749   | -2.65883  | -3.93643   | -2.91205   | -2.85259  | -2.44633  | -2.50978  | -1.84903   |
| 2 | Rtl1      | 0 | 1.09961    | 1.20251    | 2.22825    | 0.357785  | -0.407447  | 0.562549   | -0.378015 | 0.0664525 | 1.33832   | 2.57344    |
| 2 | Rtn4r     | 0 | -1.22187   | -2.70945   | -2.78713   | -2.66624  | -2.658     | -3.34775   | -2.89284  | -2.21556  | -3.45731  | -2.83573   |
| 2 | Rtn4rl2   | 0 | -0.270931  | -0.473416  | -1.42749   | -1.41904  | -2.42394   | -2.95562   | -2.66786  | -2.07294  | -2.1603   | -1.992     |
| 2 | Rxrg      | 0 | -1.13255   | -1.38985   | -2.5972    | -2.59385  | -2.50584   | -1.24193   | -1.12686  | -0.972222 | -1.26136  | 0.522306   |
| 2 | Ryr1      | 0 | -0.422156  | -0.806768  | -1.44627   | -2.61133  | -0.966279  | -3.33003   | -2.26     | -1.41593  | -1.91773  | -0.791156  |
| 2 | Ryr3      | 0 | -0.745801  | -0.10858   | -0.840207  | -2.69808  | -3.13367   | -1.34817   | -1.26643  | -0.604417 | -0.344495 | -0.96216   |
| 2 | Scn4b     | 0 | -0.999454  | -1.33527   | -1.67259   | -3.0504   | -3.63664   | -1.81468   | -1.67969  | -1.44966  | -1.39958  | -0.798567  |
| 2 | Scrt2     | 0 | 0.163523   | 0.438651   | 0.574668   | -0.433868 | -1.61475   | -1.79904   | -1.89053  | -1.79992  | -1.68496  | -1.31809   |
| 2 | Scube1    | 0 | -0.0079613 | -0.523254  | -0.489043  | -1.71158  | -1.84664   | -1.97962   | -2.13069  | -2.45212  | -2.47301  | -2.45832   |
| 2 | Sftpd     | 0 | 0.118092   | -1.27143   | -0.472074  | -0.496162 | -0.59113   | -2.61371   | -1.82055  | -1.72903  | -1.18413  | 0.850727   |
| 2 | Sh2d5     | 0 | -0.562776  | -0.894338  | -1.20982   | -1.44856  | -2.13088   | -2.6637    | -3.10044  | -1.95945  | -2.7894   | -2.44679   |
| 2 | Sh3rf2    | 0 | -1.0831    | -1.44143   | -2.10036   | -2.80953  | -3.23225   | -1.28592   | -1.15411  | -0.697254 | -0.581127 | -0.454416  |
| 2 | Shisa7    | 0 | -0.323896  | -0.577942  | -0.845412  | -1.42604  | -3.57104   | -1.91585   | -1.82862  | -1.58193  | -2.10932  | -1.88907   |
| 2 | Sipa111   | 0 | -0.321493  | -0.326688  | -0.812564  | -1.73364  | -3.24669   | -2.1252    | -1.58333  | -1.22704  | -1.89742  | -0.240494  |
| 2 | Slc17a7   | 0 | -0.601746  | -0.942511  | -1.19634   | -1.63458  | -3.02531   | -2.6068    | -2.63673  | -1.93908  | -2.95786  | -1.83393   |
| 2 | Slc18a2   | 0 | 2.32184    | 1.69114    | 1.30683    | 0.604344  | -0.0393728 | -0.0477698 | -0.251428 | 1.49418   | 2.07558   | 2.17866    |
| 2 | Slc22a3   | 0 | -1.24494   | -0.0567968 | -1.45458   | -2.45117  | -2.04573   | -2.81509   | -1.82056  | -2.08443  | -1.71272  | -0.0039622 |
| 2 | Slc30a3   | 0 | -0.474275  | -1.53018   | -1.92085   | -2.5244   | -2.67013   | -3.01487   | -2.59605  | -2.22393  | -3.13166  | -2.08851   |
| 2 | Slc39a10  | 0 | -0.561879  | -0.336842  | -0.930021  | -1.51987  | -3.69964   | -1.42179   | -1.05464  | -0.433273 | -0.94417  | -0.442616  |
| 2 | Smpd3     | 0 | -1.14686   | -1.81743   | -2.98508   | -3.43412  | -2.3971    | -3.01282   | -3.14811  | -1.98328  | -2.57191  | -2.33151   |
| 2 | Snhg11    | 0 | -0.682727  | -0.774539  | -0.707038  | -1.48621  | -0.834168  | -1.82677   | -3.11782  | -2.32134  | -2.41625  | -2.61922   |
| 2 | Snurf     | 0 | -0.010717  | -0.102205  | -1.15804   | -2.36242  | -0.229781  | -2.45022   | -1.53948  | -1.796    | -2.16586  | -2.04836   |
| 2 | Sowaha    | 0 | -0.12968   | 0.111515   | -0.554254  | -1.98323  | -3.28448   | -1.46177   | -1.5837   | -0.927688 | -1.4037   | -0.890104  |

|   |               |   |            |            |           |           |            |           |           |           |           |            |
|---|---------------|---|------------|------------|-----------|-----------|------------|-----------|-----------|-----------|-----------|------------|
| 2 | Spata2l       | 0 | -0.895578  | -1.84706   | -2.35401  | -3.0593   | -2.44484   | -3.43493  | -2.89976  | -2.1323   | -2.44785  | -2.8587    |
| 2 | Sst           | 0 | 0.0080228  | 0.186227   | -0.369353 | -0.915667 | -0.0499152 | -1.72716  | -2.95195  | -1.5225   | -1.83226  | -0.727324  |
| 2 | Sstr3         | 0 | -0.557386  | -0.366826  | -0.822568 | -1.98751  | -1.9466    | -3.05232  | -2.7553   | -1.71232  | -2.29992  | -1.74909   |
| 2 | St6galnac5    | 0 | -1.19119   | -1.42248   | -2.71323  | -2.96754  | -2.97817   | -1.85797  | -1.62729  | -0.781817 | -0.404836 | -1.32155   |
| 2 | Stx1a         | 0 | -0.350766  | -0.613568  | -1.20528  | -2.50072  | -3.15075   | -2.35565  | -1.89471  | -1.37648  | -2.50888  | -1.56657   |
| 2 | Syndig1l      | 0 | 0.16399    | -0.832153  | -0.919926 | -0.840691 | -0.619127  | -1.60826  | -3.41801  | -2.04693  | -1.59575  | -0.899913  |
| 2 | Synpr         | 0 | -0.120703  | -0.0357308 | -0.581008 | -1.73012  | -2.40085   | -2.73293  | -2.07347  | -0.991811 | -1.71006  | -0.473218  |
| 2 | Tbr1          | 0 | 0.0215119  | -0.830926  | -1.45989  | -1.01196  | -3.38491   | -1.93174  | -1.81672  | -1.27799  | -2.46165  | -1.33821   |
| 2 | Tekt4         | 0 | 2.84021    | 2.40987    | 2.17693   | 0.574272  | -0.218927  | 1.31276   | 0.76299   | 1.04664   | 0.57711   | 0.438162   |
| 2 | Tesc          | 0 | 0.253697   | 0.261124   | -0.158124 | -2.14915  | -1.39629   | -2.148    | -2.02093  | -1.60574  | -1.91687  | -0.66695   |
| 2 | Tgm3          | 0 | -0.567666  | -1.71738   | -1.39599  | -0.177059 | -3.09664   | -1.42762  | -1.37678  | -1.35228  | -3.08016  | -1.65242   |
| 2 | Tmco5         | 0 | -0.046948  | 0.510804   | -0.190084 | 0.710722  | -1.90771   | -1.78303  | -2.2791   | -0.4492   | -0.715807 | -0.0892718 |
| 2 | Tmem14a       | 0 | -0.548207  | -1.26487   | -1.32704  | -2.54281  | -3.08337   | -2.5779   | -2.9208   | -1.69322  | -1.81821  | -0.954415  |
| 2 | Tmem181a      | 0 | -2.04587   | -1.15084   | -0.78274  | -0.803748 | -3.24423   | -2.71313  | -1.16285  | -1.91315  | -1.89818  | -0.319459  |
| 2 | Tmem181b-ps   | 0 | -1.32561   | -0.90538   | -0.644236 | -0.396655 | -2.76898   | -2.7167   | -2.12585  | -2.47357  | -2.52739  | -1.49008   |
| 2 | Tmem198       | 0 | 0.363325   | -0.815194  | -0.685604 | -0.92616  | -2.30234   | -2.54047  | -2.52045  | -1.91287  | -1.89476  | -1.12924   |
| 2 | Tmem35        | 0 | 0.628651   | -0.20839   | -0.822617 | -0.609106 | -1.85319   | -2.84171  | -1.98973  | -1.41926  | -1.55329  | -1.06733   |
| 2 | Tpbg          | 0 | -0.948985  | -1.08438   | -1.21713  | -1.09212  | -2.93505   | -2.80178  | -2.31768  | -1.95139  | -2.55917  | -3.03512   |
| 2 | Trim17        | 0 | 0.814205   | 1.29009    | 1.70481   | 0.216498  | -1.80608   | -0.305824 | -0.575924 | 0.133982  | -0.978723 | -0.248891  |
| 2 | TrnE          | 0 | -0.0011148 | -0.389837  | -0.59643  | -0.104938 | 0.0251756  | -1.44814  | -1.84119  | -1.18942  | -1.54871  | 1.68534    |
| 2 | TrnM          | 0 | 0.300126   | 0.390709   | -0.701789 | -0.808652 | -2.30351   | -1.79872  | -2.55226  | -0.890054 | -0.84891  | -0.157426  |
| 2 | Tsc22d3       | 0 | 1.47397    | 1.08739    | 0.661526  | -0.492601 | -1.13184   | -1.34295  | -1.33807  | -1.02883  | -0.962995 | -0.539736  |
| 2 | Ttc9b         | 0 | -0.816856  | -1.28306   | -1.82463  | -1.47548  | -1.34331   | -3.18695  | -3.00734  | -2.68317  | -2.80192  | -1.57599   |
| 2 | Unc13a        | 0 | -0.625648  | -0.768253  | -1.49536  | -2.45947  | -3.61302   | -2.50541  | -1.58801  | -1.22678  | -1.77246  | -1.50995   |
| 2 | Vstm2l        | 0 | -0.20009   | -0.819827  | -1.99693  | -2.23553  | -0.824339  | -1.70189  | -2.52458  | -1.35898  | -1.36287  | 0.691335   |
| 2 | Ypel4         | 0 | -1.03407   | -2.12556   | -3.14614  | -1.06397  | -3.40751   | -2.1206   | -2.24559  | -1.39463  | -1.53637  | -0.998549  |
| 2 | Zdhhc22       | 0 | -0.601886  | -1.66266   | -1.27243  | -1.09721  | -2.33765   | -3.05232  | -2.49781  | -2.44029  | -2.67121  | -2.8296    |
| 2 | Zfp385b       | 0 | -0.0615746 | -1.37379   | -1.89299  | -1.87433  | -1.90033   | -2.44572  | -2.70226  | -2.37772  | -2.57428  | -2.97502   |
| 2 | Zfyve28       | 0 | -0.80501   | -0.308202  | -1.04007  | -1.62135  | -2.6779    | -2.605    | -2.23465  | -2.01402  | -3.01552  | -1.93942   |
| 3 | 1110007C09Rik | 0 | 0.27727    | 0.677769   | 1.21743   | 1.96559   | 2.83783    | 1.96806   | 1.55521   | 0.542869  | 1.05541   | -0.606551  |
| 3 | 1110038B12Rik | 0 | 0.0944976  | 1.41587    | 1.64175   | 2.43186   | 2.52926    | 0.815518  | 0.137842  | 0.619566  | 0.399575  | -0.446427  |
| 3 | 1110046J04Rik | 0 | 0.442977   | 1.86109    | 2.11211   | 1.4228    | 2.24883    | 0.19348   | -0.377659 | 1.00404   | -0.488817 | 0.132002   |
| 3 | 1200014J11Rik | 0 | 0.35608    | 1.8237     | 2.26947   | 1.61369   | 0.960342   | 0.216035  | -0.502808 | -0.647239 | -0.212954 | -0.19718   |
| 3 | 1500012F01Rik | 0 | 0.908157   | 1.14934    | 1.97396   | 2.40228   | 3.55587    | 2.05265   | 0.519782  | 1.02956   | 0.749511  | 1.36749    |
| 3 | 1700007J10Rik | 0 | 0.521113   | 1.91224    | 1.82089   | 2.03563   | 1.18944    | 0.32237   | -0.212528 | -0.39198  | -0.496062 | -0.449346  |
| 3 | 1700016D06Rik | 0 | 1.28276    | 2.54005    | 3.0299    | 2.58162   | 1.16739    | 0.26133   | 0.675095  | 0.682322  | 0.91388   | 0.948364   |
| 3 | 1810011O10Rik | 0 | 2.4655     | 1.82955    | 1.73039   | 1.17708   | -0.142869  | 1.67815   | 0.657396  | 0.146225  | -0.477578 | -0.0838387 |
| 3 | 1810032O08Rik | 0 | 0.24831    | 0.20682    | 1.43861   | 1.87821   | 0.419704   | -0.442886 | -0.693979 | -0.589381 | -1.28982  | -1.19726   |

|   |               |   |            |            |           |           |           |            |            |           |            |            |
|---|---------------|---|------------|------------|-----------|-----------|-----------|------------|------------|-----------|------------|------------|
| 3 | 2010109I03Rik | 0 | -0.107151  | 0.91851    | 0.999521  | 0.330288  | 0.64657   | -0.938787  | -0.85255   | -1.3435   | -1.19825   | -1.97371   |
| 3 | 2200002D01Rik | 0 | 0.702577   | 0.913646   | 1.54329   | 2.97245   | 3.49288   | 1.94153    | 1.00941    | 1.16706   | 1.68064    | 1.26967    |
| 3 | 2410006H16Rik | 0 | 0.202341   | 0.247743   | 0.822659  | 2.90844   | 2.37308   | 2.09805    | 2.44975    | 1.24531   | 1.719      | 1.31401    |
| 3 | 2410131K14Rik | 0 | 1.22312    | 1.58169    | 2.28383   | 0.869453  | -0.805045 | -0.567933  | -0.440391  | -0.256226 | -0.190535  | -0.0103257 |
| 3 | 2500004C02Rik | 0 | 0.524546   | 1.90861    | 2.17824   | 1.39032   | 0.821725  | -0.366804  | -0.548909  | -0.264716 | -0.310165  | -0.500144  |
| 3 | 2700038G22Rik | 0 | 0.4533     | 1.66486    | 1.94661   | 1.71872   | 1.15415   | -0.321035  | -0.455917  | -0.473365 | -0.322314  | -0.606115  |
| 3 | 2700070H01Rik | 0 | 1.03023    | 2.06941    | 2.68686   | 1.18545   | 1.90558   | 0.0523148  | 0.416535   | -0.135561 | -0.0976973 | 0.168852   |
| 3 | 2700097O09Rik | 0 | 0.774238   | 2.00081    | 1.98764   | 0.357474  | 0.925848  | 0.776268   | -0.361352  | -0.516048 | 1.66107    | -0.893749  |
| 3 | 4930470H14Rik | 0 | 0.979196   | 0.0855513  | 0.039377  | 0.383655  | 0.0308158 | -1.57659   | -1.51618   | -2.12775  | -0.781309  | -1.48228   |
| 3 | 4930486L24Rik | 0 | 1.25267    | 1.65117    | 1.90165   | 2.02074   | 2.9623    | 2.55827    | 2.65385    | 0.344784  | 0.852715   | 0.553384   |
| 3 | 5430416N02Rik | 0 | 0.786085   | 0.948366   | 1.2248    | 2.51835   | 0.871667  | -0.418253  | -0.517638  | -0.350584 | -0.269163  | -0.822302  |
| 3 | 5830416P10Rik | 0 | 0.494778   | 1.37844    | 1.57977   | 1.03096   | -0.741128 | -0.0389277 | -0.851938  | 0.0066259 | 0.118506   | -1.77145   |
| 3 | 6030440G07Rik | 0 | 0.179088   | -0.0518758 | 0.124708  | 0.148802  | 1.21862   | -1.33117   | -1.74715   | -1.62047  | -1.05574   | -1.73495   |
| 3 | 6030443J06Rik | 0 | 0.615235   | 1.91881    | 2.01843   | 1.40501   | 1.41395   | -0.96856   | -0.653612  | 0.0558572 | 0.462467   | 0.114847   |
| 3 | 6530403H02Rik | 0 | 0.0243516  | -0.145791  | -0.281941 | 0.138699  | -0.005741 | -1.13098   | -1.28152   | -2.08422  | -2.55817   | -1.98926   |
| 3 | 8430408G22Rik | 0 | 2.44607    | 2.46032    | 2.22356   | 1.24862   | 1.24191   | 0.752033   | 0.561689   | 0.189302  | -0.442066  | 1.55439    |
| 3 | 9030612E09Rik | 0 | -1.09281   | -1.04175   | -0.420095 | -0.109599 | 0.355008  | -1.68825   | -2.63028   | -2.23268  | -2.21044   | -1.26621   |
| 3 | 9230114K14Rik | 0 | 0.73888    | 1.90212    | 2.44703   | 1.84435   | 1.73126   | -0.122901  | -0.0720082 | -0.259437 | 0.183223   | 0.200087   |
| 3 | 9330136K24Rik | 0 | 0.578218   | 1.931      | 2.24609   | 1.63333   | 1.49205   | -0.168973  | -0.141078  | -0.20428  | -0.287538  | -0.251129  |
| 3 | 9330188P03Rik | 0 | -0.0617125 | -0.360464  | 0.382758  | 2.44417   | 2.38618   | 0.67689    | -0.20877   | -0.105177 | -0.0394466 | 0.100834   |
| 3 | 9430038I01Rik | 0 | 0.228838   | 2.14844    | 2.3707    | 1.20164   | 1.12606   | -0.125281  | 0.116811   | -0.633939 | -0.360859  | 0.235454   |
| 3 | 9630028B13Rik | 0 | 0.714476   | 0.785587   | 1.17556   | 0.497416  | 1.81971   | 0.0924234  | -0.615097  | -1.4291   | -1.08409   | -0.688147  |
| 3 | A130077B15Rik | 0 | 0.453667   | 0.117365   | 0.363673  | -0.253457 | 0.81932   | -1.477     | -1.48549   | -1.74705  | -1.55946   | -1.67914   |
| 3 | A230046K03Rik | 0 | 0.499911   | 2.25265    | 2.85894   | 2.53298   | 0.774894  | 0.731078   | 0.658047   | 0.229433  | 0.516796   | 0.426428   |
| 3 | A230057D06Rik | 0 | -0.587154  | -0.575414  | -0.120403 | -0.2959   | -0.801654 | -1.13036   | -2.50975   | -1.67957  | -2.60423   | -2.52036   |
| 3 | A330032B11Rik | 0 | 0.752631   | 1.93119    | 2.46026   | 1.6867    | -0.267743 | 0.328306   | -0.332282  | -0.349616 | -0.101356  | 0.255579   |
| 3 | A330069E16Rik | 0 | 0.722843   | 1.99057    | 2.46003   | 1.87374   | 1.79848   | 0.0874114  | -0.266688  | 0.16042   | -0.104753  | 0.391722   |
| 3 | A630089N07Rik | 0 | 0.602128   | 0.366688   | 0.632501  | 0.457391  | 1.67846   | -0.61264   | -0.856738  | -1.25249  | -0.940685  | -1.65552   |
| 3 | A830011K09Rik | 0 | -1.52134   | -1.07607   | -1.11796  | -0.683171 | -0.985757 | -2.8981    | -2.98807   | -2.54741  | -1.64791   | -2.70784   |
| 3 | A930003A15Rik | 0 | 1.01186    | 1.95114    | 1.26505   | 3.69175   | 2.3893    | 1.66122    | 2.1897     | 1.33319   | 2.69255    | 2.70949    |
| 3 | Abcc9         | 0 | 0.263193   | 0.996779   | 1.2746    | 1.85261   | 1.65175   | 3.3202     | 1.66437    | 1.28701   | -0.122621  | 0.447155   |
| 3 | Abhd15        | 0 | 0.861582   | 0.943034   | 1.33737   | 1.2238    | 2.02764   | 2.08157    | 1.32918    | -0.669151 | 0.193616   | -0.91025   |
| 3 | Abi3bp        | 0 | 0.0644624  | 0.0374529  | 0.444406  | 0.439448  | 0.0035106 | -1.82975   | -1.59936   | -1.53168  | -1.98475   | -1.62341   |
| 3 | Acer2         | 0 | 0.964508   | 2.45111    | 2.45378   | 1.78198   | 1.07619   | 0.535072   | -0.0313406 | -0.365574 | -0.0778801 | 0.823763   |
| 3 | Acnat1        | 0 | 0.522446   | 0.776851   | 1.48751   | -0.249876 | 0.850035  | -1.53106   | -0.44558   | -0.868344 | -0.481917  | -1.68427   |
| 3 | Acot1         | 0 | 0.750294   | 2.22443    | 2.65895   | 1.49729   | 3.5956    | 2.81363    | 1.51184    | 1.54007   | 1.31335    | 1.68369    |
| 3 | Adam28        | 0 | 1.01466    | 1.14419    | 1.43561   | 0.760233  | 0.668273  | -0.547912  | -0.801021  | -0.799982 | -1.0282    | -1.39821   |
| 3 | Adamts1       | 0 | 2.23392    | 1.98958    | 2.56077   | 3.161     | 1.08985   | 0.958176   | 0.98469    | 0.364249  | 0.814263   | 0.556402   |



|   |               |   |           |           |            |           |           |           |            |            |           |            |
|---|---------------|---|-----------|-----------|------------|-----------|-----------|-----------|------------|------------|-----------|------------|
| 3 | Adamts9       | 0 | 0.806032  | 2.06662   | 2.32122    | 3.02778   | 0.644872  | 0.630812  | 0.967292   | -0.0266577 | 0.715085  | 0.2369     |
| 3 | Adcy4         | 0 | 0.303783  | -0.143613 | 0.508879   | 2.31745   | 2.17773   | 0.904328  | 0.0548072  | -0.337614  | -0.66864  | -0.397583  |
| 3 | Adgrl4        | 0 | 2.08289   | 3.12726   | 3.21638    | 1.37712   | 1.18168   | 1.79972   | 1.30059    | 1.10222    | 0.496162  | 0.863936   |
| 3 | Adm           | 0 | 1.23685   | 1.92084   | 2.16479    | 1.95679   | 0.703682  | 1.24934   | 0.308687   | -0.35227   | -0.421618 | -0.40706   |
| 3 | Adtrp         | 0 | 0.436772  | 0.142037  | 0.129997   | 0.0407395 | 1.27405   | -1.11226  | -1.49318   | -1.74555   | -1.02057  | -1.70748   |
| 3 | Aen           | 0 | 0.522456  | 0.858172  | 0.646385   | 3.32377   | 2.03626   | 0.669726  | 0.658411   | 0.292321   | 0.0279789 | 0.108482   |
| 3 | AF357425      | 0 | 2.25643   | 2.16072   | 1.60208    | 1.21692   | 1.48477   | -0.344871 | -0.0990202 | 0.104338   | 0.135502  | -0.23999   |
| 3 | Aff1          | 0 | 2.38322   | 3.27531   | 2.53649    | 3.20136   | 1.50016   | 2.12654   | 1.98276    | 0.767437   | 1.21343   | 1.43642    |
| 3 | AK010878      | 0 | 0.438641  | 2.04968   | 2.5427     | 1.97614   | 0.367597  | -0.128716 | -0.187691  | -0.17079   | 0.288726  | 0.409324   |
| 3 | Akap12        | 0 | 2.07321   | 2.69856   | 2.43167    | 2.41052   | 0.499648  | 0.65809   | 0.561043   | 0.441997   | 0.759413  | 0.416426   |
| 3 | Aldh1a2       | 0 | 0.0431164 | 1.57841   | 1.85874    | 3.23979   | 2.54655   | 2.00733   | 2.55724    | 1.61084    | 2.11038   | 1.21839    |
| 3 | Aldh1a3       | 0 | -0.188447 | 0.346875  | -0.167782  | 2.19791   | 2.24184   | -1.03039  | 0.588393   | 0.0415306  | 0.693184  | -0.102157  |
| 3 | Amica1        | 0 | 1.37971   | 1.36801   | 2.22901    | 1.58428   | 2.38557   | 1.03852   | 2.59233    | 0.0049064  | 1.28333   | -0.379542  |
| 3 | Amigo2        | 0 | 2.41996   | 1.68666   | 3.05554    | 2.33299   | 1.22751   | 1.30406   | 1.42733    | 2.15628    | 3.73136   | 2.28622    |
| 3 | Angpt2        | 0 | 1.41193   | 2.77006   | 2.80656    | 2.79453   | 1.1316    | 2.43672   | 1.68803    | 0.548135   | 1.38757   | 0.563448   |
| 3 | Angptl4       | 0 | 0.909754  | 2.72899   | 2.02903    | 2.70412   | 2.9013    | 2.47435   | 1.85206    | 0.343473   | 1.12434   | 1.42295    |
| 3 | Ankfy1        | 0 | 0.377342  | 2.28766   | 2.69849    | 2.06444   | 0.604591  | 0.514703  | 0.496427   | 0.124348   | 0.288691  | -0.127844  |
| 3 | Ano6          | 0 | -0.195532 | 0.905577  | 1.1513     | 2.07396   | 2.17743   | 2.61514   | 2.38994    | 0.27483    | 0.876909  | 0.537109   |
| 3 | Anxa2         | 0 | 0.17147   | 0.927845  | 1.50882    | 2.45973   | 2.989     | 2.58061   | 2.32103    | 1.55763    | 1.97271   | 0.788829   |
| 3 | Apold1        | 0 | 1.3166    | 0.5753    | 0.475856   | 0.181983  | -0.254916 | -1.57491  | -1.76272   | -1.35597   | -1.07139  | -0.862113  |
| 3 | Apoo          | 0 | -0.458376 | 0.532943  | -0.0499663 | -0.496396 | 0.864606  | -1.38327  | -2.13818   | -0.565265  | -1.93324  | -1.67944   |
| 3 | Apopt1        | 0 | 0.652285  | 1.7691    | 2.11369    | 1.51362   | 2.32906   | 0.225233  | -0.142166  | -0.0407909 | -0.170528 | -0.205494  |
| 3 | Aqp9          | 0 | -0.539823 | -0.35354  | -0.0992133 | 2.56381   | 1.5646    | 0.24155   | 1.45186    | 0.669535   | 0.642496  | -0.58027   |
| 3 | Arhgef37      | 0 | 1.83086   | 2.3488    | 3.26078    | 2.04121   | -0.149874 | 1.8876    | 1.54945    | 1.1917     | 1.32671   | 0.761425   |
| 3 | Arid5a        | 0 | 1.73415   | 2.38846   | 2.21093    | 1.76711   | 2.1218    | 0.131404  | 0.805404   | -0.0830944 | 0.336692  | 0.0850604  |
| 3 | Arrdc2        | 0 | 1.82158   | 1.98107   | 1.27971    | 0.966347  | 0.541862  | 0.548233  | -0.88016   | -0.588429  | -0.592313 | -0.36865   |
| 3 | Arrdc4        | 0 | 0.13587   | 1.35271   | 1.43215    | 2.65137   | 1.97285   | 1.60324   | 2.40123    | 0.314692   | 0.892449  | -0.287017  |
| 3 | Arsj          | 0 | -2.72139  | -0.902784 | -0.581667  | -0.670797 | -2.21493  | -2.63899  | -2.50423   | -1.50071   | -2.74119  | -2.15199   |
| 3 | Ash2l         | 0 | 0.388757  | 1.89752   | 2.41231    | 1.77388   | 1.15426   | 0.175599  | -0.165872  | -0.461627  | -0.207519 | -0.0373557 |
| 3 | Aspg          | 0 | 0.750791  | 0.827398  | 1.59082    | 2.94283   | 3.03216   | 2.31484   | 2.361      | 1.51681    | 1.45032   | 0.524975   |
| 3 | Atf3          | 0 | 2.7449    | 2.56638   | 2.56405    | 2.3856    | 1.59624   | 1.67644   | 1.83222    | 0.537132   | 1.31179   | 0.0552925  |
| 3 | Atp10d        | 0 | 1.02043   | 2.36385   | 2.27799    | 2.48486   | 1.28297   | 1.90416   | 1.32691    | 0.562085   | 0.141367  | -0.321856  |
| 3 | Atp2c2        | 0 | -0.596132 | -0.429458 | 1.7819     | 0.547111  | -1.01677  | -1.22027  | -1.24103   | -0.983178  | -1.79909  | -0.936209  |
| 3 | Atp8b1        | 0 | -0.977226 | 0.368407  | 2.04954    | 2.42453   | 1.63514   | 1.41599   | 1.19511    | 0.697051   | 0.0996437 | 0.467247   |
| 3 | AY074887      | 0 | 0.372843  | 0.417208  | 0.842385   | 0.106426  | 0.923446  | -0.597352 | -1.08697   | -1.5082    | -1.48996  | -1.85646   |
| 3 | B230208H11Rik | 0 | -0.859647 | 1.33318   | 2.24892    | 0.883418  | 1.50952   | 0.854607  | 0.817103   | 0.613302   | 1.04031   | -1.15557   |
| 3 | B3gnt3        | 0 | 0.640744  | 1.46534   | 2.44419    | 2.83286   | 3.03774   | 1.37245   | 1.25283    | 0.924384   | 1.04596   | 0.277194   |
| 3 | B3gnt5        | 0 | -0.742357 | 0.884852  | 1.29045    | 2.51594   | 2.2174    | 1.70804   | 1.46071    | 0.908713   | 1.14619   | -0.161006  |

|   |               |   |            |            |           |          |           |            |            |           |            |           |
|---|---------------|---|------------|------------|-----------|----------|-----------|------------|------------|-----------|------------|-----------|
| 3 | B4galt1       | 0 | 0.57768    | 1.82776    | 1.16926   | 1.88786  | 2.95915   | 2.97655    | 2.83887    | 1.17719   | 1.18122    | 0.93374   |
| 3 | Bach1         | 0 | 1.4078     | 2.16692    | 2.56764   | 2.65014  | 2.23094   | 2.19335    | 2.70877    | 0.914317  | 1.29749    | 0.0098553 |
| 3 | Bag3          | 0 | 2.12814    | 3.31386    | 3.28716   | 2.6348   | 2.2527    | 1.77704    | 1.65536    | 1.10948   | 1.791      | 0.880648  |
| 3 | Baz1a         | 0 | 0.111707   | 1.23942    | 1.48275   | 1.63401  | 3.33791   | 2.16877    | 1.86614    | 0.852179  | 1.20321    | 0.152479  |
| 3 | BB283400      | 0 | 0.234665   | 0.589117   | 0.794633  | 0.819481 | 0.911844  | -1.1618    | -0.968057  | -1.33128  | -1.10217   | -1.72459  |
| 3 | BC030870      | 0 | 0.652217   | 1.82349    | 2.20087   | 1.79715  | 1.44292   | 0.389213   | -0.546807  | -0.68107  | 0.221136   | 0.0198386 |
| 3 | BC039771      | 0 | 0.588528   | 1.03526    | 0.843729  | 0.052962 | 1.84626   | -0.263512  | -0.867259  | -1.00771  | -1.0402    | -1.24084  |
| 3 | Bcas1         | 0 | 0.691029   | 0.878435   | 1.3372    | 2.67304  | 3.70373   | 2.073      | 1.5776     | 1.42814   | 1.30454    | 1.92543   |
| 3 | Bcas2         | 0 | 0.874671   | 2.23118    | 2.56804   | 1.54201  | 2.46149   | 0.301308   | -0.241704  | 0.405859  | 0.521515   | 0.950666  |
| 3 | Bcl3          | 0 | 0.236489   | 1.31517    | 2.03354   | 2.67181  | 2.96731   | 2.09215    | 2.13307    | 1.22687   | 1.22789    | 0.310074  |
| 3 | Bcl6b         | 0 | 1.10773    | 0.967759   | 2.14821   | 0.513417 | 2.39275   | 0.898426   | -0.654695  | -0.732493 | 0.520521   | 1.3079    |
| 3 | Blnk          | 0 | 0.272639   | 1.17771    | 2.12096   | 1.31125  | 1.86608   | 2.02667    | 2.21486    | 0.497502  | 0.4025     | -0.788105 |
| 3 | Brip1         | 0 | 0.359902   | 1.44265    | 1.69899   | 1.2109   | 1.30143   | -0.0715833 | -0.416354  | -0.928517 | -0.750157  | -0.949961 |
| 3 | Brip1os       | 0 | 0.370878   | 1.74275    | 2.03582   | 1.53481  | 2.82901   | 1.28123    | 1.10661    | 0.134095  | 0.0372798  | -0.258723 |
| 3 | Btbd16        | 0 | 0.24641    | -0.49001   | 0.154914  | 2.62502  | 1.73077   | 0.0068661  | -0.109572  | -0.609737 | -0.545843  | 0.184199  |
| 3 | Btc           | 0 | 0.41737    | 0.725567   | 1.35735   | 2.57706  | 1.12681   | -0.415318  | 0.145124   | -0.400026 | -0.078401  | -0.996791 |
| 3 | Btg1          | 0 | 1.42125    | 1.85403    | 2.07477   | 2.04028  | 3.59814   | 2.91746    | 3.27486    | 1.3585    | 2.06775    | 1.55096   |
| 3 | C330013E15Rik | 0 | 0.706324   | -1.11091   | 0.422947  | 2.20208  | -0.131171 | -0.994651  | -0.0893263 | -0.563831 | -0.0874508 | -1.41461  |
| 3 | C5ar1         | 0 | 0.999225   | 1.6868     | 2.1       | 2.81841  | 3.03439   | 2.84276    | 2.175      | 0.968198  | 1.4118     | 0.569518  |
| 3 | Car5b         | 0 | -0.0456522 | 1.80151    | 1.91215   | 1.29373  | 2.23618   | 0.0438944  | 0.582585   | -0.331948 | -0.477604  | -0.152583 |
| 3 | Cast          | 0 | 1.34679    | 2.51458    | 2.33277   | 3.14261  | 2.92706   | 3.24879    | 3.53634    | 1.98619   | 2.47587    | 1.98921   |
| 3 | Ccdc86        | 0 | 0.521891   | 0.794226   | 1.62483   | 2.41274  | 2.08689   | 1.42369    | 1.0563     | -0.195304 | -0.0096141 | -0.69957  |
| 3 | Ccl11         | 0 | 0.527472   | 0.708069   | 1.7662    | 2.77448  | 2.57104   | 1.72196    | 1.47771    | 0.599377  | 0.120806   | 0.0223895 |
| 3 | Ccl12         | 0 | -0.318173  | 0.531541   | 0.946255  | 2.33984  | 1.89059   | 1.56821    | 1.41494    | 0.332321  | 0.357284   | -0.965686 |
| 3 | Ccl2          | 0 | 0.80979    | 1.20932    | 1.84914   | 2.06767  | 1.8325    | 1.29612    | 1.42847    | 0.996692  | 0.906521   | -1.46707  |
| 3 | Ccl24         | 0 | 0.939251   | 0.765441   | 1.50026   | 1.01022  | -1.38932  | -0.147461  | -0.11121   | -0.512301 | -0.80103   | -1.54922  |
| 3 | Ccl3          | 0 | 1.81168    | 2.29605    | 3.21472   | 2.50462  | 2.29488   | 2.27951    | 2.55026    | 1.6668    | 1.49146    | 0.102733  |
| 3 | Ccl4          | 0 | 2.47871    | 2.70661    | 3.55158   | 3.31659  | 3.0135    | 2.78178    | 2.91334    | 2.18213   | 2.05698    | 1.3887    |
| 3 | Ccl7          | 0 | 1.0427     | 0.751555   | 1.35448   | 1.80401  | 1.28179   | 0.726028   | 1.21292    | 0.50375   | 0.820702   | -1.96268  |
| 3 | Ccl9          | 0 | 1.04204    | 1.73258    | 2.38346   | 3.20509  | 2.57001   | 1.79158    | 2.69184    | 1.26182   | 1.93568    | 0.303108  |
| 3 | Ccm2l         | 0 | -0.884136  | -0.0448218 | 0.0217024 | 1.791    | 1.23953   | 0.63975    | -0.441039  | 0.213478  | -0.787387  | -1.78956  |
| 3 | Cd101         | 0 | 1.12332    | 1.55961    | 1.72538   | 1.6036   | 2.68703   | 2.11558    | 3.021      | 1.86352   | 0.991415   | -0.246738 |
| 3 | Cd14          | 0 | 0.983728   | 1.55694    | 2.44339   | 3.48766  | 2.2498    | 1.73809    | 2.30753    | 1.32027   | 1.10037    | 0.369484  |
| 3 | Cd163         | 0 | 1.57387    | 2.21496    | 1.73346   | 3.32222  | 1.64439   | 2.27003    | 2.43153    | 0.580044  | 0.697814   | 0.545525  |
| 3 | Cd24a         | 0 | 0.275843   | 1.66549    | 1.55711   | 2.65583  | 3.44934   | 1.82374    | 1.84217    | 1.54384   | 2.24665    | 0.811137  |
| 3 | Cd300ld       | 0 | 0.806332   | 1.0364     | 1.35188   | 2.17276  | 2.93244   | 2.6799     | 2.30632    | 1.52873   | 2.52865    | 0.260274  |
| 3 | Cd44          | 0 | 0.0763854  | 0.829954   | 1.235     | 2.64449  | 2.85493   | 2.25224    | 2.50963    | 1.59548   | 1.79892    | 0.88536   |
| 3 | Cd93          | 0 | 1.73944    | 2.61441    | 2.39849   | 2.78256  | 3.00963   | 2.67       | 2.13224    | 0.869167  | 1.56494    | 0.557586  |

|   |          |   |           |           |           |           |           |           |           |           |           |            |
|---|----------|---|-----------|-----------|-----------|-----------|-----------|-----------|-----------|-----------|-----------|------------|
| 3 | Cdc14a   | 0 | 0.369126  | 1.03726   | 1.79006   | 3.50155   | 2.54732   | 2.35274   | 2.20713   | 1.75219   | 2.25055   | 1.84795    |
| 3 | Cdh19    | 0 | 1.37278   | 1.88501   | 3.23387   | 1.58025   | -0.495048 | 1.30815   | 0.887079  | 0.989971  | 0.292723  | 0.961036   |
| 3 | Cdh5     | 0 | 0.185458  | 2.07676   | 1.97892   | 2.88367   | 2.19194   | 2.5547    | 2.11043   | 0.87331   | 1.11728   | 0.478919   |
| 3 | Cdhr1    | 0 | 0.678562  | 0.257845  | 0.27892   | 0.59117   | 1.1182    | -1.45552  | -1.3562   | -1.15887  | -1.21448  | -1.52359   |
| 3 | Cdk6     | 0 | -0.186181 | 1.69137   | 1.66019   | 2.4725    | 0.458223  | 1.10678   | 1.49097   | -0.694654 | 0.0025525 | 0.0604583  |
| 3 | Cdkn1a   | 0 | 1.10105   | 1.61384   | 1.52982   | 2.02981   | 1.41696   | 0.329928  | -0.329144 | -0.549169 | -0.544901 | -0.51414   |
| 3 | Cdr2     | 0 | 1.71788   | 2.91559   | 2.80093   | 2.92301   | 0.530152  | 1.46963   | 0.557527  | 1.27358   | 1.28651   | 1.83883    |
| 3 | Cdsn     | 0 | -1.31263  | -0.397103 | 0.257651  | 2.41329   | 1.2349    | -0.458241 | 0.923549  | 0.889286  | 0.106106  | -0.0745438 |
| 3 | Ceacam1  | 0 | 0.0266124 | 1.64602   | 1.43186   | 2.89683   | 1.96461   | 1.98568   | 1.30942   | 0.397468  | 0.262532  | -0.0106272 |
| 3 | Ceacam2  | 0 | 1.01908   | 3.02103   | 3.28218   | 0.928402  | 0.63813   | 1.51766   | 1.01068   | 1.48672   | 1.78275   | 2.31387    |
| 3 | Cebpb    | 0 | 1.50522   | 1.69449   | 1.77631   | 2.40414   | 2.63998   | 0.289775  | 1.10853   | -0.5006   | 0.829431  | 0.428057   |
| 3 | Cebpd    | 0 | 1.0727    | 1.9521    | 1.61053   | 2.71232   | 3.22017   | 1.64801   | 1.5186    | 0.601655  | 0.96807   | 0.115825   |
| 3 | Cenpf    | 0 | 0.584225  | 1.92599   | 2.20887   | 1.69276   | 2.97064   | 1.85309   | 0.817751  | 0.169505  | 0.202817  | 0.39885    |
| 3 | Cfap45   | 0 | 1.27965   | 2.50917   | 2.56314   | 1.56424   | 3.02997   | 2.16804   | 1.48759   | 2.08022   | 3.38397   | 3.26596    |
| 3 | Cflar    | 0 | 0.4132    | 1.81441   | 2.35123   | 2.13801   | 2.46641   | 1.8238    | 1.66757   | 0.456579  | 0.337535  | -0.160609  |
| 3 | Ch25h    | 0 | 0.715169  | 1.82535   | 2.06279   | 2.38166   | 2.91857   | 2.66614   | 2.48156   | 1.2773    | 0.551299  | 0.638028   |
| 3 | Chac1    | 0 | 0.841915  | 1.8399    | 2.1838    | 2.17633   | -0.257323 | -0.674543 | 0.0843817 | 0.100126  | 0.21742   | 0.404095   |
| 3 | Chek1    | 0 | 1.17387   | 0.294245  | 0.695115  | 1.13817   | 1.31923   | 0.866616  | -0.177514 | -0.987834 | 0.0816584 | 2.82984    |
| 3 | Chrb4    | 0 | 3.25769   | 2.17701   | 2.88996   | 3.29051   | 3.58493   | 2.20563   | 1.70721   | 2.48104   | 2.80164   | 1.82125    |
| 3 | Churc1   | 0 | 0.546111  | 2.07922   | 2.54127   | 1.90308   | 1.03031   | -0.123754 | -0.236587 | -0.185294 | 0.116493  | 0.716821   |
| 3 | Clca3a1  | 0 | 0.844435  | 0.757573  | 0.844967  | 1.24143   | 1.73107   | 1.07772   | -0.334947 | -1.19021  | -0.671418 | -1.11484   |
| 3 | Cldn1    | 0 | 2.00632   | 3.40617   | 1.85939   | 2.82587   | 0.559367  | 2.15904   | 2.06129   | 0.877786  | 2.19513   | 2.40571    |
| 3 | Clec4d   | 0 | 1.85915   | 2.18889   | 2.27834   | 3.05869   | 3.5027    | 2.932     | 3.32979   | 2.90638   | 3.36854   | 2.21216    |
| 3 | Clic4    | 0 | 1.68063   | 2.52697   | 2.73453   | 3.73994   | 0.813513  | 1.31689   | 1.91771   | 1.31794   | 1.54541   | 2.05497    |
| 3 | Cnn3     | 0 | 0.574908  | 1.26604   | 1.67271   | 2.67185   | 2.87975   | 2.69852   | 2.94274   | 1.73168   | 1.75198   | 0.815602   |
| 3 | Cnr2     | 0 | 0.811717  | 2.00544   | 2.70855   | 2.17329   | 1.62756   | 0.967638  | 0.885     | 0.12817   | 0.400423  | -0.461409  |
| 3 | Col4a1   | 0 | 0.551432  | 1.07594   | 1.47213   | 2.24691   | 1.68624   | 2.64073   | 1.55437   | 0.037943  | 0.0970086 | -0.34319   |
| 3 | Col4a2   | 0 | 0.485356  | 0.926188  | 1.27697   | 2.04025   | 1.05427   | 2.42289   | 1.11875   | -0.20272  | -0.323511 | -0.77027   |
| 3 | Commd7   | 0 | 0.655514  | 2.43129   | 2.40689   | 1.61034   | 1.30891   | -0.266946 | -0.343079 | 0.106912  | 0.295577  | 0.892475   |
| 3 | Comt     | 0 | 0.186652  | 1.17568   | 1.65235   | 0.814168  | 1.39723   | -0.197918 | -0.1688   | -0.835217 | -1.21585  | -1.11951   |
| 3 | Coq10b   | 0 | 1.71914   | 1.86057   | 2.49384   | 1.36304   | 0.0771503 | -0.580698 | 0.0709704 | 0.534482  | 0.722356  | 1.96259    |
| 3 | Coro6    | 0 | -1.18973  | -1.26215  | -0.846498 | -0.789202 | -1.87165  | -1.24931  | -2.46291  | -2.5286   | -2.70453  | -3.31571   |
| 3 | Cpm      | 0 | 1.0272    | 2.30128   | 2.70959   | 2.54638   | 1.02179   | 1.41466   | 0.695319  | 0.125861  | 0.0990941 | 0.432211   |
| 3 | Creb3l2  | 0 | 1.56368   | 2.80426   | 2.69291   | 2.53775   | 2.5133    | 2.53673   | 2.68924   | 2.06164   | 0.982337  | 0.433121   |
| 3 | Crispld2 | 0 | 3.10464   | 2.47841   | 1.52535   | 2.0826    | 1.11455   | 1.09678   | 0.393912  | 0.098079  | 0.628217  | 0.747536   |
| 3 | Crx      | 0 | 0.356053  | 1.21632   | 1.58914   | 1.28519   | 1.09527   | -0.933386 | -0.722671 | -0.907562 | -0.766629 | -0.657214  |
| 3 | Csrnp1   | 0 | 1.06092   | 1.55451   | 1.86106   | 1.44837   | -0.190615 | -0.67906  | -0.101285 | -0.830731 | -0.677776 | -0.340394  |
| 3 | Ctla2a   | 0 | 0.935461  | 1.60207   | 1.8853    | 1.62817   | 2.24642   | 1.21775   | 0.300186  | -0.365551 | -0.220576 | -0.58574   |

|   |               |   |            |          |            |           |           |            |            |            |           |            |
|---|---------------|---|------------|----------|------------|-----------|-----------|------------|------------|------------|-----------|------------|
| 3 | Ctla2b        | 0 | 1.25233    | 1.90643  | 1.58987    | 2.07949   | 3.08543   | 3.32007    | 2.19623    | 1.3997     | 1.21297   | 0.436018   |
| 3 | Cxcl1         | 0 | 1.59617    | 1.8659   | 3.01826    | 3.35712   | 1.96371   | 0.461926   | 2.70609    | 1.82385    | 1.66584   | 1.414      |
| 3 | Cxcr2         | 0 | 0.196609   | 0.631634 | 0.426022   | -0.117331 | 1.43694   | -1.127     | -1.52279   | -1.64441   | -0.957275 | -1.21156   |
| 3 | Cyb5r1        | 0 | 1.22264    | 0.693442 | 1.31211    | 3.61209   | 1.63894   | 1.76249    | 2.04637    | 0.856212   | 0.607152  | 0.283264   |
| 3 | Cyp2e1        | 0 | 0.462301   | 1.99341  | 2.21112    | 1.76053   | 1.16844   | -0.0638653 | -0.318095  | -0.581877  | -0.118394 | 0.133698   |
| 3 | Cyr61         | 0 | 1.03228    | 0.282326 | 0.491647   | 0.808567  | -1.2243   | -1.35798   | -0.605794  | -1.57061   | -1.18583  | -1.611     |
| 3 | Cyyr1         | 0 | -0.232444  | 2.25967  | 1.79317    | 2.78165   | 0.612226  | 1.1565     | 1.02849    | 0.762707   | 0.508332  | -0.285138  |
| 3 | D3Erttd254e   | 0 | 0.360901   | 2.12028  | 2.61919    | 1.59081   | 0.217904  | -0.268005  | -0.0799185 | -0.0330985 | 0.108521  | 0.140116   |
| 3 | D730005E14Rik | 0 | 1.0031     | 1.96681  | 2.21295    | 2.22835   | 3.12573   | 2.25592    | 2.29774    | 1.27247    | 1.63802   | -0.0834937 |
| 3 | Dab2          | 0 | -0.208401  | 1.16195  | 1.12924    | 2.561     | 2.65504   | 2.77457    | 2.06089    | 1.07679    | 1.42495   | 1.56414    |
| 3 | Dach2         | 0 | 0.0279107  | 0.407366 | -0.0732456 | 2.93327   | -0.933604 | 0.48392    | -0.706697  | 0.515429   | 0.521621  | 0.0037545  |
| 3 | Dcaf10        | 0 | 0.157297   | 1.45248  | 2.25006    | 1.27669   | 0.269808  | -0.345005  | -0.476095  | -0.752579  | -0.464622 | -0.766423  |
| 3 | Dclre1c       | 0 | 0.531377   | 1.53936  | 2.30323    | 1.16241   | 1.36051   | 0.458606   | 0.145578   | -0.624407  | -0.734953 | -0.649395  |
| 3 | Ddc           | 0 | 2.55641    | 1.80692  | 3.19991    | 1.92523   | 1.95441   | 2.28869    | 0.998434   | 1.93402    | 3.096     | 3.42904    |
| 3 | Ddit4         | 0 | 2.23533    | 2.31305  | 1.6497     | 0.591969  | 0.891918  | 0.860407   | -0.262523  | -0.674634  | 0.107232  | 0.0614741  |
| 3 | Ddx21         | 0 | 0.0647928  | 0.435487 | 1.20889    | 2.67617   | 2.90411   | 1.55552    | 1.34055    | 0.605029   | 0.650609  | 0.186922   |
| 3 | Ddx39         | 0 | 0.560579   | 1.00469  | 2.22332    | 2.60332   | 1.86091   | 0.935227   | 0.586925   | 0.181367   | -0.102316 | -0.475646  |
| 3 | Dennd2c       | 0 | 0.321274   | 1.52729  | 1.00989    | 1.60908   | 1.34373   | 2.30633    | 1.15535    | 0.657435   | 0.481831  | -1.45674   |
| 3 | Des           | 0 | 0.842688   | 0.998259 | 1.49331    | 2.34667   | 3.92971   | 2.01713    | 1.58014    | 1.532      | 1.58354   | 1.02157    |
| 3 | Dll1          | 0 | -0.0401339 | 1.16127  | 2.76989    | -0.721147 | -0.234012 | 0.028622   | -0.668618  | -0.501094  | 0.441854  | 0.322004   |
| 3 | Dmkn          | 0 | 2.07192    | 1.77866  | 3.67108    | 1.91684   | 2.43787   | 1.31977    | 0.563301   | 2.02854    | 2.79178   | 1.90315    |
| 3 | Dnaja1        | 0 | 0.845853   | 1.64593  | 1.9833     | 1.4821    | -1.39212  | -0.243984  | -0.385511  | 0.414167   | 0.788603  | 0.914606   |
| 3 | Dnajib1       | 0 | 1.59828    | 2.426    | 2.50424    | 0.966568  | -0.406135 | 0.0372465  | 0.0437851  | 0.134185   | 0.484777  | 0.786605   |
| 3 | Dusp10        | 0 | 0.363688   | 1.0723   | 1.31947    | 3.11629   | 2.10111   | 0.60163    | 0.450256   | 0.341661   | -0.160562 | 0.0957306  |
| 3 | Dusp16        | 0 | 1.86702    | 2.99249  | 3.32397    | 2.43009   | 0.680007  | 1.49154    | 1.95699    | 0.76301    | 1.68992   | 1.23078    |
| 3 | Dusp2         | 0 | 0.524099   | 1.06628  | 2.31694    | 0.431494  | -0.374854 | -1.0446    | 0.638328   | -0.186367  | 0.205911  | -1.33256   |
| 3 | Dysf          | 0 | -0.132773  | 0.668495 | 1.76905    | 2.03726   | 2.2664    | 1.15794    | 0.85667    | 0.0189387  | -0.528289 | -0.406332  |
| 3 | E030011O05Rik | 0 | 2.43937    | 3.69235  | 2.60985    | 2.64383   | 0.710356  | 1.48038    | 1.80776    | 1.80342    | 1.59097   | 2.25545    |
| 3 | Eaf1          | 0 | -0.502884  | 1.29573  | 2.44421    | 2.93349   | 1.25684   | 1.51787    | 1.1432     | 0.627642   | 0.715837  | 0.431299   |
| 3 | Edn1          | 0 | 0.792177   | 1.34666  | 1.44214    | 2.24086   | 1.42256   | 0.287959   | -0.519368  | -0.334741  | -0.508326 | -0.675096  |
| 3 | Efna1         | 0 | 1.09049    | 3.19901  | 2.0463     | 1.79296   | 3.22515   | 1.40988    | 2.19032    | 1.30014    | 1.6926    | 0.450753   |
| 3 | Egr2          | 0 | 1.16766    | 2.23911  | 2.52021    | 0.281415  | -0.926363 | -0.0219369 | 0.618938   | 0.612917   | 0.931128  | 1.23216    |
| 3 | Ehd2          | 0 | 0.160914   | 1.48719  | 2.01624    | 2.49986   | 2.98043   | 2.90458    | 1.94381    | 1.47201    | 1.47434   | 0.814148   |
| 3 | Eif4ebp1      | 0 | -0.0036819 | 0.508901 | 1.3867     | 2.17251   | 2.96766   | 1.84232    | 1.82097    | 0.624791   | 0.998037  | 0.0048734  |
| 3 | Elovl1        | 0 | -0.0117311 | 0.323714 | 1.49772    | 2.71575   | 2.49707   | 1.85402    | 1.05087    | 0.662221   | 0.238411  | 0.187443   |
| 3 | Emilin2       | 0 | 1.34045    | 2.53753  | 2.02164    | 2.35685   | 3.86991   | 2.18139    | 2.36101    | 1.30255    | 1.43196   | 1.05352    |
| 3 | Emp1          | 0 | 0.663859   | 1.5425   | 1.67645    | 2.85747   | 2.86402   | 2.65441    | 2.25777    | 1.35684    | 1.94268   | 0.304185   |
| 3 | Eng           | 0 | 0.236115   | 0.57465  | 0.731081   | 2.42026   | 2.38536   | 1.57648    | 0.901547   | 0.128153   | 0.0007372 | -0.672712  |

|   |               |   |            |            |          |           |            |            |            |            |            |            |
|---|---------------|---|------------|------------|----------|-----------|------------|------------|------------|------------|------------|------------|
| 3 | Epha2         | 0 | 1.35026    | 0.939397   | 1.24423  | 1.46787   | 0.879317   | 1.4659     | 0.658645   | -0.674665  | -0.616447  | -1.40216   |
| 3 | Erccl6l       | 0 | 0.421902   | 2.21297    | 1.69843  | 2.16683   | 3.22032    | 3.09311    | 2.49198    | 1.46152    | 1.48753    | 1.39122    |
| 3 | Errfi1        | 0 | 2.34509    | 2.21165    | 1.73792  | 1.50737   | -0.376642  | 0.371566   | 0.0756318  | -0.0987154 | 0.288718   | 0.111816   |
| 3 | Esam          | 0 | 0.0101648  | 1.67647    | 1.57739  | 2.26742   | 2.98658    | 1.57622    | 0.519213   | 0.252517   | 0.569226   | 0.348316   |
| 3 | Esr1          | 0 | -0.144041  | -0.163304  | 0.551856 | 1.93828   | -2.32538   | -0.420771  | -0.233997  | -0.695702  | -0.0996433 | -0.045978  |
| 3 | Ets1          | 0 | -1.0232    | 0.160916   | 1.20317  | 1.78284   | 2.60505    | 1.482      | 1.12835    | 0.383312   | 0.612752   | 0.114184   |
| 3 | Eva1c         | 0 | 1.7452     | 2.32966    | 2.34704  | 2.27501   | 1.89217    | 1.46265    | 1.24405    | 1.98118    | 3.895      | 3.08306    |
| 3 | Exosc2        | 0 | 1.06915    | 2.1505     | 2.4168   | 2.28415   | 1.81634    | 0.0586246  | 0.0132686  | 0.0832529  | 0.241912   | 0.724956   |
| 3 | F2r           | 0 | -0.0720435 | 1.16118    | 2.37848  | 1.4721    | 0.880895   | 1.86449    | 0.988046   | -0.373767  | 0.237123   | -0.864902  |
| 3 | F830016B08Rik | 0 | 0.994137   | 0.492779   | 0.534967 | 0.302052  | 1.40986    | -0.669955  | 0.202374   | -1.38319   | -1.11508   | -1.68329   |
| 3 | Fam107b       | 0 | 2.22962    | 3.20643    | 2.66097  | 3.71427   | 2.11139    | 2.41352    | 2.90781    | 1.52138    | 2.43011    | 1.43225    |
| 3 | Fam129b       | 0 | 0.306032   | 0.749611   | 1.68012  | 3.10176   | 2.59135    | 2.08068    | 2.23801    | 0.894383   | 1.61624    | 0.63788    |
| 3 | Fam196b       | 0 | 1.4481     | 1.11478    | 2.96563  | 2.54652   | 1.89831    | 0.352048   | 1.96652    | 1.42391    | 3.01797    | 0.826428   |
| 3 | Fam83a        | 0 | 0.799185   | 1.97375    | 2.27935  | 2.19453   | 1.4764     | 0.0271794  | 0.262499   | -0.228866  | 0.0317661  | -0.126189  |
| 3 | Fas           | 0 | 0.950627   | 3.29253    | 2.73994  | 3.02362   | 2.88124    | 2.13887    | 1.71461    | 1.32047    | 2.03544    | 1.44153    |
| 3 | Fbxo17        | 0 | 0.808167   | 2.26942    | 2.7618   | 2.33051   | 1.62717    | 0.375126   | 0.622647   | 0.017794   | 0.498677   | 0.384107   |
| 3 | Fbxo43        | 0 | 1.80161    | 3.15062    | 2.45796  | 1.03576   | 2.61488    | 1.47047    | 2.82346    | 1.09115    | 2.10414    | 0.55599    |
| 3 | Fhad1         | 0 | 1.56846    | 1.53187    | 2.9987   | 3.05148   | 3.20722    | 2.49237    | 1.29187    | 1.13603    | 2.56647    | 2.48244    |
| 3 | Fhl2          | 0 | 0.319242   | -0.0414721 | 0.330863 | -0.158521 | -0.922317  | -1.88892   | -1.78995   | -2.00925   | -2.28693   | -0.936303  |
| 3 | Filip1l       | 0 | 2.28302    | 2.59339    | 1.93867  | 2.52016   | 3.8479     | 2.49237    | 2.06751    | 1.08954    | 2.44643    | 1.20932    |
| 3 | Fkbp5         | 0 | 1.28991    | 2.27417    | 2.37605  | 1.29956   | 0.389553   | 0.99923    | 0.0181566  | -0.2681    | -0.205094  | -0.353311  |
| 3 | Flnc          | 0 | 1.45793    | 1.59378    | 1.99008  | 3.73232   | 2.8554     | 2.76334    | 2.60488    | 1.55106    | 1.75329    | 1.21338    |
| 3 | Flt4          | 0 | 0.22928    | 2.17285    | 1.91605  | 2.93166   | 2.17534    | 1.17018    | 1.12259    | 0.0260338  | 0.521361   | 0.588563   |
| 3 | Fmo2          | 0 | 0.696932   | 1.8125     | 2.96354  | 0.528046  | 0.52908    | 1.89754    | 1.16355    | 0.0925709  | -0.243178  | 1.86917    |
| 3 | Fndc9         | 0 | 1.22179    | 1.86406    | 3.22849  | 1.49943   | -0.294771  | 0.622129   | 0.330268   | 0.153465   | 1.09939    | 1.01882    |
| 3 | Fos           | 0 | 2.71599    | 2.19466    | 1.73555  | 1.16885   | -0.024064  | -0.109275  | -0.0758036 | 0.150161   | 0.713128   | 0.608012   |
| 3 | Foxf1         | 0 | 2.20321    | 0.887163   | 0.568627 | 1.77425   | 0.446918   | 1.24763    | 0.729321   | -1.09832   | 0.992907   | -0.855041  |
| 3 | Foxf2         | 0 | 0.689861   | 1.34249    | 1.40479  | 2.83212   | 3.4182     | 1.80975    | 1.60486    | 0.428038   | 0.96565    | 1.76355    |
| 3 | Fpr2          | 0 | 0.849767   | 2.2416     | 2.4232   | 2.44273   | 2.01655    | 1.09828    | 1.34588    | -0.604794  | 1.44734    | 0.619473   |
| 3 | Fst           | 0 | -0.140781  | 1.184      | 1.20774  | -0.760009 | -0.0374245 | -1.73248   | -1.65471   | -0.798034  | -1.26617   | -0.818503  |
| 3 | Fxn           | 0 | 0.139855   | 2.05409    | 1.78979  | 1.84922   | 2.23221    | 0.611845   | -0.190743  | -0.386683  | 0.0112738  | 0.374058   |
| 3 | Gabra2        | 0 | -0.100965  | 0.578755   | 0.502777 | 1.05118   | -0.132431  | -1.51211   | -1.31189   | -1.30805   | -1.28885   | -1.88645   |
| 3 | Gadd45a       | 0 | 2.06031    | 2.27273    | 2.40028  | 3.2989    | 3.75593    | 2.13257    | 2.2551     | 2.00331    | 2.61497    | 1.07845    |
| 3 | Gadd45b       | 0 | 1.86567    | 1.72693    | 2.07295  | 2.15067   | 0.868055   | -0.546149  | 0.211922   | 0.0058851  | 0.128913   | -0.0292507 |
| 3 | Gadd45g       | 0 | 2.06747    | 2.17126    | 2.15516  | 2.10052   | 1.83294    | 0.32069    | 0.267806   | -0.0449139 | 0.152663   | 0.326863   |
| 3 | Gch1          | 0 | 2.36587    | 1.55136    | 1.86978  | 1.72796   | 2.13864    | 1.09988    | 1.43679    | -0.548976  | 1.62588    | -0.271843  |
| 3 | Gclm          | 0 | -0.565142  | -0.0917866 | 0.527667 | 2.68473   | -0.840511  | -0.0844322 | -0.254482  | -0.610717  | -0.894016  | -0.523532  |
| 3 | Gdf15         | 0 | 0.450766   | -0.092604  | 0.229176 | 1.82607   | 0.918938   | 0.854617   | 1.32128    | 0.365522   | 0.432445   | -2.0916    |

|   |         |   |           |            |           |           |          |            |            |            |            |            |
|---|---------|---|-----------|------------|-----------|-----------|----------|------------|------------|------------|------------|------------|
| 3 | Gdnf    | 0 | -0.34335  | 0.111315   | 0.735143  | 2.35432   | 2.40263  | -0.218758  | 0.592046   | 0.0021288  | 0.248971   | -0.468799  |
| 3 | Gem     | 0 | 3.052     | 2.76365    | 2.91376   | 2.25185   | 0.706638 | 1.1501     | 1.62742    | 0.680328   | 1.61986    | 1.47237    |
| 3 | Ghdc    | 0 | 0.272812  | 1.16542    | 1.69918   | 1.11968   | 2.10504  | 0.0644135  | -0.0930123 | -0.705429  | -0.434271  | -0.961564  |
| 3 | Gimap6  | 0 | 2.22623   | 2.63786    | 2.00488   | 0.75766   | 1.77981  | 0.360885   | 0.667447   | -0.531213  | 0.657348   | 0.601887   |
| 3 | Gimap8  | 0 | 0.447664  | 1.15877    | 1.9071    | 2.29      | 3.05963  | 2.50566    | 2.79525    | 1.10352    | 2.31126    | 1.04303    |
| 3 | Gjb1    | 0 | 0.0861524 | 0.440783   | 2.32869   | 2.84948   | 2.68736  | 1.20389    | 1.29773    | 0.820452   | 0.771862   | 0.753694   |
| 3 | Gla     | 0 | 1.29602   | 2.30502    | 2.3265    | 1.71176   | 3.05571  | 2.59596    | 2.46294    | 0.620288   | 1.43963    | 0.375043   |
| 3 | Gldn    | 0 | -0.236888 | -0.0248445 | 1.32666   | 2.88013   | 1.6992   | 1.33349    | 1.55857    | -0.284378  | 0.423679   | 1.12392    |
| 3 | Glod4   | 0 | 0.429918  | 2.34252    | 2.56863   | 1.46774   | 1.30657  | 0.0307182  | 0.179194   | 0.0844291  | -0.108492  | -0.0521421 |
| 3 | Gm10190 | 0 | 0.870312  | 2.09321    | 2.511     | 1.69729   | 1.71592  | -0.207736  | -0.0252595 | -0.226711  | 0.175944   | 0.770063   |
| 3 | Gm10778 | 0 | 0.706143  | 2.19569    | 2.6447    | 2.06077   | 1.41869  | -0.0923746 | 0.0148494  | -0.0108943 | 0.436422   | 0.812098   |
| 3 | Gm10791 | 0 | 1.48891   | 1.37978    | 1.31346   | 2.81131   | 1.60886  | -0.503077  | -0.337324  | 0.562844   | 0.704173   | 0.0671741  |
| 3 | Gm11974 | 0 | 0.566748  | 1.49077    | 2.27824   | 2.89628   | 2.51728  | 0.743828   | 0.69197    | 0.304994   | 0.631093   | 0.328468   |
| 3 | Gm12338 | 0 | -1.35066  | 0.377941   | -0.11617  | 1.13855   | 0.976889 | -1.25777   | -2.07848   | -0.567019  | -0.411986  | -1.0379    |
| 3 | Gm13305 | 0 | 0.934004  | 1.75386    | 0.326632  | 0.715594  | 0.446214 | 0.820887   | 0.381315   | 0.479382   | -2.27599   | 0.920597   |
| 3 | Gm13889 | 0 | 1.67335   | 1.24105    | 1.57179   | 1.67844   | 2.23562  | 0.0094773  | -0.531455  | -0.521315  | 0.0050413  | 0.222831   |
| 3 | Gm13985 | 0 | 1.13323   | 2.05048    | 2.3743    | 1.45037   | 0.533822 | -0.262753  | 0.0093172  | -0.386928  | -0.289768  | -0.119869  |
| 3 | Gm14005 | 0 | 0.142635  | 0.727765   | 1.50186   | 1.58585   | 2.74819  | 0.608644   | 0.51878    | -0.41958   | 0.304972   | -0.775489  |
| 3 | Gm16287 | 0 | 0.255872  | 0.948813   | 1.31213   | 0.317543  | 0.976283 | -0.43965   | -0.950686  | -1.15442   | -1.37673   | -1.46992   |
| 3 | Gm16973 | 0 | 1.12588   | 1.34284    | 1.85044   | 1.43723   | 0.253497 | -0.334603  | -0.244618  | -1.24808   | -0.0630671 | -0.80156   |
| 3 | Gm17644 | 0 | 0.906309  | 0.549656   | -0.00448  | 0.525088  | 0.695385 | -1.2348    | -1.58703   | -1.9828    | -1.05328   | -0.0889902 |
| 3 | Gm17821 | 0 | 0.78725   | 0.482604   | 0.543235  | 0.35979   | 1.541    | -0.768003  | -0.937988  | -1.32815   | -0.979241  | -1.57298   |
| 3 | Gm20337 | 0 | 0.785903  | 1.15679    | 1.47515   | 0.608852  | 1.4487   | -0.605267  | -1.20155   | -1.28963   | -0.511973  | 0.0721817  |
| 3 | Gm3258  | 0 | 2.3234    | 3.16416    | 2.62457   | 2.48997   | 3.8601   | 2.47606    | 2.62717    | 3.50915    | 3.04495    | 3.08735    |
| 3 | Gm6537  | 0 | 0.78842   | 0.916757   | 2.92785   | -0.145241 | 2.79005  | 1.84033    | 1.46246    | 1.66392    | 1.63485    | 2.09692    |
| 3 | Gm694   | 0 | -0.267371 | 1.16464    | 1.48443   | 2.79103   | 2.9092   | 1.72766    | 0.728808   | 0.751659   | 0.791378   | 1.14035    |
| 3 | Gm7367  | 0 | 0.391074  | 0.550855   | 0.429707  | 1.62535   | 0.071973 | 0.342423   | 0.810302   | -2.20882   | -0.110072  | -1.05477   |
| 3 | Gng13   | 0 | 0.589864  | 1.31276    | 0.826886  | 0.225939  | 0.983303 | -1.35846   | -1.88044   | -0.688743  | -0.540058  | -0.396786  |
| 3 | Gpr151  | 0 | 0.851965  | 1.07889    | 2.29035   | 2.16982   | 0.987057 | 0.47689    | 0.306229   | 1.71201    | 3.00983    | 2.55909    |
| 3 | Gpr182  | 0 | -1.09062  | 0.769542   | 0.832349  | 2.24343   | 2.08755  | 1.15565    | 1.7859     | 0.804092   | 0.933879   | -0.176198  |
| 3 | Gpr35   | 0 | 0.844109  | 1.93649    | 2.36765   | 2.92068   | 2.84887  | 2.20416    | 2.67112    | 1.39796    | 1.98967    | 0.373453   |
| 3 | Gpr84   | 0 | -0.303083 | 0.771053   | 2.03963   | 2.14538   | 1.84047  | 2.10285    | 2.17136    | 0.824989   | -0.0570973 | 0.308119   |
| 3 | Grap2   | 0 | -0.671218 | -0.379676  | -0.186548 | -0.483543 | 0.508643 | -2.39905   | -1.47381   | -2.27769   | -2.21532   | -1.13681   |
| 3 | Grk1    | 0 | 2.52953   | 0.825642   | 1.81728   | 1.83153   | 2.30658  | 0.377222   | 0.620713   | 0.761373   | 0.787398   | -0.712208  |
| 3 | Grk4    | 0 | 0.570079  | 0.25668    | 0.397297  | 0.174289  | 1.52118  | -0.846478  | -1.01827   | -1.50834   | -1.06801   | -1.69689   |
| 3 | Grrp1   | 0 | 0.0862884 | 0.822855   | 0.887975  | 1.53234   | 3.289    | 0.582443   | -0.139566  | -0.183191  | 0.307715   | 0.51399    |
| 3 | H2-T23  | 0 | 0.86304   | 2.20443    | 2.58936   | 2.09987   | 2.5146   | 1.47796    | 2.12664    | 0.233472   | 0.801643   | 0.088705   |
| 3 | H2-T3   | 0 | 0.658878  | 1.06309    | 1.34891   | 0.695766  | 1.31501  | -0.835791  | -1.50934   | -1.08174   | -0.328255  | -0.464543  |

|   |          |   |            |            |          |           |            |            |           |            |            |            |
|---|----------|---|------------|------------|----------|-----------|------------|------------|-----------|------------|------------|------------|
| 3 | Has2     | 0 | -0.61671   | 0.936376   | 1.167    | 2.19715   | 2.96536    | 1.46279    | 1.68334   | 1.36579    | 0.579394   | 0.536442   |
| 3 | Hbegf    | 0 | 0.434415   | 1.12718    | 1.50166  | 1.9875    | 2.70214    | 0.476472   | -0.272639 | -0.147544  | -0.110978  | -0.0592377 |
| 3 | Hcar2    | 0 | 2.17316    | 2.22474    | 2.73806  | 3.03388   | 2.863      | 3.13686    | 3.59465   | 2.74182    | 2.42685    | 1.24056    |
| 3 | Hcrt     | 0 | 1.76547    | 0.642577   | 0.590243 | 3.09426   | 2.72533    | 0.782204   | 0.128767  | 0.789968   | 0.970484   | 0.776598   |
| 3 | Hif3a    | 0 | 0.909573   | 0.879075   | 0.755307 | 0.547553  | -0.627378  | -0.278649  | -1.21647  | -1.53835   | -1.69111   | -1.20044   |
| 3 | Hmox1    | 0 | 0.966746   | 1.80754    | 2.21035  | 3.11672   | 2.53174    | 2.05853    | 1.97606   | 0.964818   | 1.14926    | 0.0008584  |
| 3 | Hs3st3b1 | 0 | 1.32337    | 2.9233     | 2.20695  | 3.5842    | 2.00988    | 2.37837    | 1.57155   | 1.23931    | 2.39449    | 3.05795    |
| 3 | Hspa1a   | 0 | 1.84784    | 2.24698    | 2.24329  | 1.54189   | -0.211244  | -0.0706091 | -0.108589 | 0.0716695  | 0.343937   | 0.332012   |
| 3 | Hspa1b   | 0 | 1.86796    | 2.27778    | 2.26821  | 1.67858   | -0.0543806 | -0.018142  | -0.150917 | 0.138441   | 0.388094   | 0.355697   |
| 3 | Hspa1l   | 0 | 1.77633    | 2.37596    | 2.31333  | 1.46423   | 0.190141   | -0.267069  | 0.160023  | -0.0984093 | 0.209718   | 0.452756   |
| 3 | Hspb1    | 0 | 1.97031    | 2.36107    | 2.14765  | 2.69119   | 1.18492    | 0.768855   | 0.063026  | 0.193943   | 0.451103   | 0.481312   |
| 3 | Hspb8    | 0 | 0.771618   | 1.53706    | 1.70543  | 2.73303   | 3.51156    | 2.38366    | 2.8731    | 2.04251    | 2.62665    | 1.74647    |
| 3 | Hspd1    | 0 | 0.681348   | 1.6954     | 2.4803   | 2.85804   | 0.126684   | 0.039164   | 0.237335  | 0.42174    | 0.558628   | 0.662154   |
| 3 | Hspe1    | 0 | 0.729892   | 1.89125    | 2.45067  | 2.98825   | 0.953553   | 0.0957572  | 0.176873  | 0.379674   | 0.596543   | 0.82424    |
| 3 | Hsph1    | 0 | 0.580389   | 1.46935    | 2.0068   | 1.66501   | -1.08832   | -0.606639  | -0.483001 | -0.133502  | -0.0442682 | 0.148961   |
| 3 | Htra4    | 0 | -0.0080505 | 1.66401    | 2.1424   | 0.366775  | -0.578628  | 0.232189   | 0.981531  | -1.42766   | -0.129356  | -0.0837298 |
| 3 | Hyal1    | 0 | -0.0839055 | 0.371305   | 0.813609 | 2.00716   | 2.36825    | 0.53042    | 0.584228  | -0.39131   | -0.471629  | -0.849372  |
| 3 | Hyal3    | 0 | 0.413071   | 1.65762    | 1.60837  | 0.660291  | 0.727116   | -0.385963  | -1.04438  | -0.937942  | -1.27003   | 0.100086   |
| 3 | Hykk     | 0 | 0.705985   | 2.41685    | 2.78874  | 0.77469   | -0.0807239 | -0.0809761 | 0.421374  | 0.0941279  | 0.302995   | 0.0844003  |
| 3 | Icam1    | 0 | 1.71938    | 1.76679    | 3.53508  | 2.88724   | 2.7594     | 2.72466    | 3.26874   | 1.7492     | 2.06806    | 1.46406    |
| 3 | Id1      | 0 | 0.931206   | -0.0581898 | 0.759455 | 3.12115   | 2.63471    | 1.02498    | 0.46766   | 0.533683   | 0.626028   | 0.930608   |
| 3 | Ier2     | 0 | 3.0227     | 2.54786    | 2.93372  | 2.86108   | 1.84321    | 1.26555    | 1.60448   | 0.873685   | 1.30017    | 0.848543   |
| 3 | Ier3     | 0 | 1.75554    | 1.60774    | 2.17954  | 1.96      | 2.32165    | 0.545747   | 0.446567  | -0.337081  | -0.241289  | 0.598308   |
| 3 | Ifrd1    | 0 | 1.66295    | 1.1162     | 0.952528 | 1.27786   | -0.490313  | -0.923832  | -0.740147 | -0.732737  | -0.825793  | -0.7823    |
| 3 | Igf2bp2  | 0 | 0.141197   | 1.18352    | 1.91182  | 2.03235   | 2.00725    | 1.20777    | 0.653449  | -0.268906  | -0.108607  | -0.771834  |
| 3 | Igfbp3   | 0 | 0.203011   | 0.501684   | 0.989303 | 2.33305   | 2.70512    | 1.33264    | 0.185246  | -0.313004  | 0.134952   | 0.0245493  |
| 3 | Il11     | 0 | 0.366296   | 0.763119   | 1.51572  | 2.46677   | 1.60454    | -0.17881   | -0.50404  | -0.618633  | -0.257987  | -0.0094632 |
| 3 | Il1a     | 0 | 1.56538    | 2.43725    | 3.75021  | 2.14425   | 2.38382    | 2.24677    | 3.48239   | 2.10008    | 2.17052    | 1.4081     |
| 3 | Il1b     | 0 | 1.51594    | 1.42662    | 3.60436  | 2.57209   | 2.29578    | 0.782181   | 2.66593   | 2.10682    | 1.98101    | 1.06926    |
| 3 | Il1r1    | 0 | -0.0160175 | 2.6018     | 2.0823   | 2.71809   | 2.05356    | 2.38679    | 2.17759   | 0.946627   | 1.55322    | 0.724067   |
| 3 | Il1rap   | 0 | 0.101504   | 0.616068   | 1.56606  | 3.5599    | 0.887746   | 1.41713    | 1.96326   | 1.43854    | 0.562064   | 0.848836   |
| 3 | Il1rn    | 0 | 0.281616   | 1.34126    | 2.52573  | 3.18321   | 1.93069    | 1.50831    | 2.59929   | 1.5666     | 2.08643    | 0.642039   |
| 3 | Il33     | 0 | 0.651303   | 0.941747   | 1.2212   | 3.82405   | 1.72075    | 1.47936    | 2.41846   | 1.95776    | 1.82784    | 1.99393    |
| 3 | Il4ra    | 0 | 0.506837   | 1.69904    | 1.42216  | 2.41752   | 2.88508    | 2.19996    | 2.02572   | 0.643842   | 0.857468   | -0.0385469 |
| 3 | Il6      | 0 | 0.438368   | 0.200427   | 1.6603   | 2.10587   | 0.234951   | -0.263497  | -1.14871  | -0.110371  | -0.257938  | -1.14871   |
| 3 | Il6ra    | 0 | 0.318166   | 1.97049    | 1.61945  | 1.50319   | 3.46195    | 2.28344    | 2.60104   | 1.22169    | 1.39134    | 0.865691   |
| 3 | Imp4     | 0 | 0.713048   | 1.45558    | 0.944314 | 3.70024   | 1.826      | 1.58566    | 1.62379   | 0.76969    | 0.296617   | 1.86903    |
| 3 | Inhba    | 0 | 0.870604   | 0.701269   | 0.45995  | -0.162622 | 0.162682   | -1.73704   | -1.58515  | -0.974789  | -1.72229   | -1.2307    |

|   |          |   |           |           |          |          |            |            |           |            |            |            |
|---|----------|---|-----------|-----------|----------|----------|------------|------------|-----------|------------|------------|------------|
| 3 | Irak1    | 0 | -0.025525 | 1.10741   | 1.60875  | 1.33625  | 2.00347    | -0.242463  | -0.369576 | -0.677954  | -0.51289   | -0.751993  |
| 3 | Irf9     | 0 | 0.224719  | 1.23961   | 1.70228  | 2.15486  | 2.51941    | 2.68851    | 2.56409   | 0.680196   | 1.10241    | 0.351482   |
| 3 | Irx3     | 0 | 2.94198   | 0.937414  | 1.89557  | 2.58333  | 1.72767    | 2.40132    | 0.918827  | 1.90631    | 3.3261     | 2.70701    |
| 3 | Itga2b   | 0 | 1.19839   | 1.57155   | 1.63118  | 2.81842  | 3.67704    | 1.87058    | 2.00906   | 0.537871   | 1.24571    | 1.52578    |
| 3 | Itga5    | 0 | 0.311128  | 0.530855  | 1.16698  | 2.22535  | 2.78207    | 2.25656    | 1.65013   | 0.483658   | 0.653198   | -0.135524  |
| 3 | Itga7    | 0 | 0.298878  | 0.793887  | 1.22641  | 2.91536  | 2.57678    | 0.627387   | 1.34891   | -0.0927105 | 0.173705   | 0.617254   |
| 3 | Itgad    | 0 | 0.84912   | 1.43382   | 2.26438  | 1.93714  | -0.0569246 | 1.32592    | -0.108984 | 0.240746   | -0.83931   | -0.217014  |
| 3 | Itih3    | 0 | 1.63348   | 0.855271  | 2.06048  | 2.47115  | 3.34236    | 2.3279     | 1.76024   | 1.84884    | 3.21646    | 2.93742    |
| 3 | Itpkc    | 0 | 1.08671   | 0.655476  | 2.04116  | 1.24924  | 1.09476    | -0.66448   | -0.421669 | -1.46136   | 0.758357   | 0.301354   |
| 3 | Jun      | 0 | 2.00794   | 1.87941   | 1.47093  | 0.861913 | 0.733459   | -0.126617  | -0.500851 | -0.741601  | -0.275971  | -0.473276  |
| 3 | Kcnj8    | 0 | 0.47363   | 0.266164  | 1.86318  | 2.40919  | 2.70804    | 1.54147    | 0.657359  | 0.184471   | 0.308787   | -0.0074067 |
| 3 | Kcnq1ot1 | 0 | 0.700509  | 0.174176  | 0.532934 | 0.441418 | 1.2935     | -0.817667  | -0.976588 | -1.42313   | -0.992595  | -1.86425   |
| 3 | Kctd11   | 0 | 1.75506   | 1.33049   | 1.77693  | 3.02518  | 3.09113    | 2.81637    | 2.84918   | 0.776162   | 1.94784    | 1.31435    |
| 3 | Kdm6b    | 0 | 1.12134   | 0.861087  | 1.58669  | 1.62216  | 0.407874   | -0.619189  | -0.764671 | -1.09882   | -0.486656  | -0.767314  |
| 3 | Klf6     | 0 | 1.02759   | 2.29944   | 2.63637  | 2.14647  | 1.62295    | 0.968916   | 0.985901  | -0.291612  | 0.162871   | 0.215841   |
| 3 | Klhl14   | 0 | -0.101344 | 0.24902   | 0.086627 | 0.511511 | 0.233328   | -1.36345   | -2.18575  | -1.66584   | -1.58375   | -1.66745   |
| 3 | Klk9     | 0 | -0.276485 | 0.0731332 | 0.111687 | 2.74472  | 2.40465    | 1.11458    | 0.974461  | 0.431146   | 0.566034   | 0.0551006  |
| 3 | Kremen2  | 0 | 0.39379   | 1.01174   | 1.28544  | 0.623647 | 0.652101   | -0.664337  | -0.794443 | -1.57217   | -1.08001   | -1.36011   |
| 3 | Lama5    | 0 | 2.28737   | 0.527596  | 1.42403  | 3.13047  | 2.67991    | 2.20851    | 1.94132   | 2.1527     | 2.1675     | 0.445448   |
| 3 | Lax1     | 0 | 1.39633   | 2.48082   | 2.70277  | 1.61619  | 1.32276    | -0.729858  | 0.979868  | 0.742052   | 1.81451    | 1.53797    |
| 3 | Lcmt2    | 0 | 0.565671  | 1.73989   | 1.98669  | 1.62232  | 1.21873    | -0.27895   | -0.621539 | -0.334817  | -0.528152  | -0.286853  |
| 3 | Lcn2     | 0 | 1.54487   | 2.23591   | 2.33745  | 2.84946  | 2.38554    | 1.87816    | 3.14843   | 3.08622    | 2.81565    | 0.710182   |
| 3 | Ldlr     | 0 | 1.13032   | 0.593855  | 0.611205 | 1.82379  | 0.175026   | -1.02981   | -1.52643  | -0.992244  | -0.311713  | 0.504045   |
| 3 | Lepr     | 0 | 1.28752   | 2.72606   | 3.47912  | 3.34826  | 2.08742    | 1.65766    | 2.60522   | 1.34101    | 2.23227    | 1.87012    |
| 3 | Lif      | 0 | 0.611262  | 1.04187   | 2.26059  | 2.93723  | 1.53479    | 0.467602   | 0.0184165 | 0.3119     | 0.150678   | -0.0172881 |
| 3 | Lilr4b   | 0 | 0.178049  | 0.457598  | 1.40796  | 2.32088  | 2.69286    | 2.36252    | 2.26125   | 1.57259    | 2.18563    | 0.478935   |
| 3 | Lilrb4a  | 0 | 0.984506  | 1.7715    | 2.1118   | 2.75022  | 3.14272    | 3.10121    | 2.97126   | 2.43056    | 2.70542    | 1.39528    |
| 3 | Litaf    | 0 | 0.993915  | 1.74136   | 1.65756  | 2.37791  | 3.44673    | 2.49267    | 2.82898   | 1.46382    | 1.86563    | 0.619436   |
| 3 | Lmna     | 0 | 1.21373   | 1.53509   | 2.1374   | 2.83836  | 3.70633    | 1.58085    | 1.09046   | 0.720727   | 1.55175    | 1.55461    |
| 3 | Loxl2    | 0 | 1.02542   | 2.15424   | 2.41547  | 2.21133  | 2.9203     | 2.15814    | 1.89878   | 0.475174   | 0.898601   | 0.18333    |
| 3 | Lpar2    | 0 | -0.422737 | 2.81747   | 2.21218  | 0.423533 | 0.190236   | 0.632817   | 0.0627515 | -0.138245  | 0.423261   | 0.484367   |
| 3 | Lpin3    | 0 | 0.962177  | 1.91362   | 1.63874  | 2.21927  | 3.22644    | 1.60366    | 0.756254  | 0.600639   | -0.0026046 | 0.496334   |
| 3 | Lrg1     | 0 | -0.50899  | 1.23001   | 0.79673  | 1.94459  | 2.67783    | 1.7689     | 0.766289  | 0.480293   | 0.0367439  | -0.201955  |
| 3 | Lrrc2    | 0 | 0.798669  | 2.15726   | 2.19974  | 1.08905  | 0.390405   | -0.220739  | -0.190525 | -0.431959  | -0.0227245 | -0.74445   |
| 3 | Lrrc3    | 0 | -0.111341 | 1.11457   | 1.24732  | 0.207916 | 0.629586   | 0.217785   | 0.0513912 | -1.41837   | -1.48033   | -1.61833   |
| 3 | Lrrc32   | 0 | 2.01465   | 2.01501   | 2.51727  | 2.39521  | 1.34956    | 0.987344   | 0.591863  | 0.280734   | -0.09059   | 0.0958183  |
| 3 | Lrrc8c   | 0 | 0.648527  | 2.21825   | 2.30199  | 1.59856  | -0.466558  | -0.0260529 | 0.919281  | 0.52315    | 0.600744   | 2.32426    |
| 3 | Lrm4cl   | 0 | 0.266729  | 2.07162   | 2.96022  | 1.94121  | 2.51676    | 1.7486     | 1.20343   | 1.45771    | 2.54808    | 0.350821   |



|   |          |   |           |          |          |           |           |            |            |            |            |           |
|---|----------|---|-----------|----------|----------|-----------|-----------|------------|------------|------------|------------|-----------|
| 3 | Ly6a     | 0 | 0.548565  | 1.45823  | 2.40747  | 3.09981   | 2.75262   | 1.76966    | 1.55047    | 0.651613   | 0.884043   | 0.623458  |
| 3 | Ly6c1    | 0 | 0.388197  | 1.26118  | 1.54256  | 2.14707   | 0.868607  | 0.363123   | -0.175091  | -0.347997  | -0.71825   | -1.14371  |
| 3 | Lyve1    | 0 | -0.533331 | 0.38222  | 0.380747 | 1.49064   | 0.110349  | 0.710377   | -0.765294  | -1.29888   | -1.30424   | -1.83156  |
| 3 | Maff     | 0 | 2.54901   | 2.52342  | 2.63079  | 2.52677   | 1.35835   | 0.912392   | 0.76339    | 0.248454   | 0.754132   | 0.859534  |
| 3 | Mafk     | 0 | 1.96071   | 2.58507  | 2.34517  | 2.9943    | 1.03096   | 1.04579    | 0.660935   | 0.246413   | 0.606473   | 0.94792   |
| 3 | Mak      | 0 | -0.251752 | 1.1865   | 2.08333  | 1.34728   | -1.3938   | -0.746775  | -0.161512  | 0.255584   | 0.830413   | 0.618683  |
| 3 | Mall     | 0 | 0.837429  | 1.91584  | 2.02389  | 2.21236   | 1.08862   | 0.600787   | -0.0153602 | -0.397916  | -0.115558  | -0.495803 |
| 3 | Malt1    | 0 | -0.242731 | 0.849847 | 2.16101  | 1.88831   | 1.25832   | 1.73471    | 2.7452     | 0.697778   | 0.471148   | -0.135528 |
| 3 | Map3k14  | 0 | 0.365364  | 1.23976  | 1.84425  | 1.46671   | 1.35009   | 1.65308    | 1.58773    | -0.510511  | 0.852001   | -1.21851  |
| 3 | Map3k6   | 0 | 1.59395   | 2.18023  | 2.16433  | 2.36145   | 1.42269   | 0.185453   | 0.22115    | -0.108725  | 0.0635847  | 0.273594  |
| 3 | Mapkapk2 | 0 | 0.467662  | 1.0894   | 1.50235  | 2.22057   | 2.6034    | 1.83894    | 2.24547    | 0.441772   | 0.406233   | -0.298349 |
| 3 | Marveld2 | 0 | 0.515693  | 2.34317  | 2.66055  | 1.1991    | 1.14682   | -0.239917  | 0.598778   | -0.290808  | 0.0021345  | 0.314485  |
| 3 | Mat2a    | 0 | 0.592975  | 1.22061  | 2.29738  | 2.46707   | -0.786525 | 0.0891528  | -0.115245  | 0.270117   | 0.501766   | 0.990577  |
| 3 | Mb21d1   | 0 | 0.0742665 | 0.748823 | 0.955136 | 1.14396   | 2.62555   | 1.05787    | 0.901782   | -1.10202   | -0.0807296 | -0.500128 |
| 3 | Mboat1   | 0 | 0.249027  | 0.766715 | 2.08968  | 1.72108   | 3.55177   | 1.71729    | 2.23347    | 0.840525   | 1.52475    | 1.28893   |
| 3 | Mcidas   | 0 | 0.0443924 | 1.72696  | 1.00115  | -0.410986 | 0.842688  | -0.730055  | -1.19956   | -0.936233  | -0.696722  | -1.44813  |
| 3 | Mcl1     | 0 | 1.37739   | 2.86752  | 2.65851  | 3.21116   | 2.95058   | 2.80335    | 3.12871    | 1.23757    | 2.38119    | 1.94009   |
| 3 | Mfsd11   | 0 | 0.473692  | 2.06812  | 2.50932  | 1.78035   | 1.38261   | 0.11508    | 0.128144   | -0.230588  | 0.0479135  | -0.157743 |
| 3 | Mfsd2a   | 0 | 0.84307   | 0.568533 | 1.07091  | 0.102919  | -1.15047  | -0.679466  | -1.39995   | -1.48243   | -1.49865   | -1.37634  |
| 3 | Mfsd2b   | 0 | 0.714183  | 1.55281  | 1.95305  | 1.53319   | 1.1269    | -0.0649392 | -0.99839   | -0.498722  | -0.606038  | -0.050138 |
| 3 | Mfsd4    | 0 | -0.46999  | 0.542716 | 0.978476 | 0.162228  | -0.608128 | -1.77576   | -1.61183   | -1.25441   | -1.95117   | -1.40067  |
| 3 | Mir17hg  | 0 | 0.314642  | 1.7348   | 2.74458  | 3.5385    | 1.94046   | 0.953719   | 1.53305    | 1.62143    | 1.95814    | 1.40764   |
| 3 | Mir3473f | 0 | 0.564346  | 1.64622  | 1.92089  | 1.42233   | 0.836761  | -0.404555  | -0.743668  | -0.433984  | -0.377191  | -0.830512 |
| 3 | Mmp8     | 0 | 1.58232   | 1.74598  | 1.90134  | 1.48036   | 3.20599   | 3.23756    | 2.88318    | 1.2231     | 1.95646    | 0.78657   |
| 3 | Mmrn2    | 0 | 0.650883  | 1.33837  | 1.30798  | 2.63159   | 3.65723   | 1.62837    | 1.37859    | 0.806208   | 0.83808    | 1.03223   |
| 3 | Morc4    | 0 | 0.85938   | 2.27328  | 3.14602  | 3.1239    | 1.09409   | 0.999126   | 0.978384   | 0.911522   | 0.897308   | 1.19535   |
| 3 | Mreg     | 0 | 0.870944  | 1.0088   | 1.8617   | 2.13995   | -0.631043 | -0.392216  | -0.374555  | -0.531852  | 0.604716   | -0.546882 |
| 3 | Mrgpra6  | 0 | 0.496911  | 0.294603 | 0.352573 | 0.190668  | 0.869822  | -1.27373   | -1.18025   | -1.71797   | -1.35744   | -1.83233  |
| 3 | Mrpl27   | 0 | 0.829213  | 1.85121  | 1.86881  | 1.28991   | 2.03239   | 0.0644461  | -0.270487  | -0.0486876 | -0.757059  | -0.160419 |
| 3 | Mrpl43   | 0 | 0.528967  | 1.96432  | 2.2339   | 1.49344   | 1.55003   | -0.264445  | -0.247793  | -0.401412  | -0.0562705 | -0.110202 |
| 3 | Mrps6    | 0 | 0.633628  | 0.857195 | 1.22667  | 2.04473   | 3.62977   | 1.54322    | 0.655835   | 0.523738   | 0.821055   | 0.460001  |
| 3 | Msn      | 0 | 0.254672  | 0.919936 | 1.31004  | 2.5282    | 2.96854   | 2.67639    | 2.53202    | 1.27039    | 1.52835    | 1.1205    |
| 3 | Msr1     | 0 | 0.30513   | 0.762661 | 1.19386  | 2.3918    | 2.7336    | 2.55786    | 2.21532    | 1.37908    | 2.00122    | 0.269338  |
| 3 | Mt1      | 0 | 0.412818  | 0.955123 | 0.791119 | 3.14991   | 2.0178    | 1.00974    | 0.348401   | 0.383135   | 0.16687    | -0.365628 |
| 3 | Mt2      | 0 | 0.548607  | 1.18343  | 1.16139  | 3.48614   | 2.08799   | 0.893936   | 0.658906   | 0.537833   | 0.278574   | 0.284723  |
| 3 | Mthfd2   | 0 | 0.357773  | 2.14957  | 2.18128  | 3.55439   | 1.66645   | 0.477274   | 1.68756    | 1.25624    | 1.81598    | 1.23179   |
| 3 | Mtmr11   | 0 | -0.202427 | 0.368048 | 0.943542 | 2.07972   | 2.80405   | 1.26634    | 0.404348   | 0.114255   | 0.312335   | -0.437596 |
| 3 | Muc1     | 0 | 0.357894  | 0.718816 | 1.41036  | 2.26326   | 1.34608   | 1.36804    | 0.691967   | -0.223919  | -0.19208   | -1.31985  |

|   |              |   |           |           |            |           |           |           |            |            |           |            |
|---|--------------|---|-----------|-----------|------------|-----------|-----------|-----------|------------|------------|-----------|------------|
| 3 | Mvp          | 0 | 0.0348231 | 0.406203  | 0.864553   | 2.61545   | 2.79441   | 2.08255   | 2.30476    | 1.21331    | 1.62841   | 1.04803    |
| 3 | Myc          | 0 | 1.48859   | 2.07986   | 2.30585    | 2.98934   | 2.14341   | 2.20859   | 1.92647    | 0.886278   | 0.872181  | -0.138168  |
| 3 | Myd88        | 0 | 0.248929  | 1.1332    | 1.56089    | 2.67354   | 2.90098   | 2.15116   | 2.28997    | 1.00414    | 1.12719   | 0.324943   |
| 3 | Myo1c        | 0 | -0.12743  | 0.829229  | 1.5412     | 2.40348   | 1.99771   | 1.85829   | 1.2408     | -0.0280124 | 0.389059  | -0.55157   |
| 3 | Nab2         | 0 | 0.568024  | 1.3833    | 2.57602    | 0.0058375 | -1.12693  | -0.562596 | -0.119309  | -0.149845  | 0.109765  | 0.752744   |
| 3 | Nde1         | 0 | 0.889615  | 2.26565   | 3.10948    | 1.67767   | 3.24686   | 3.02722   | 2.04033    | 1.79062    | 1.40246   | 1.29885    |
| 3 | Nedd9        | 0 | 1.54796   | 2.6803    | 2.87646    | 1.95382   | -0.140075 | 1.40377   | 1.42419    | 0.736704   | 1.38869   | 0.296526   |
| 3 | Nfil3        | 0 | 2.13705   | 2.28475   | 2.4644     | 1.7951    | 0.96846   | -0.26328  | 0.338876   | 0.407476   | 1.02446   | 0.052245   |
| 3 | Nfkb2        | 0 | 1.13351   | 1.08547   | 2.06867    | 2.4825    | 2.9575    | 2.80922   | 3.4505     | 1.79041    | 1.86279   | 1.26059    |
| 3 | Nfkbiz       | 0 | 1.48416   | 2.05117   | 2.55709    | 1.935     | 0.563506  | 0.7848    | 1.17094    | -0.12533   | 0.217371  | -0.51205   |
| 3 | Nhlh2        | 0 | 1.56492   | 1.74426   | 2.42953    | 1.9864    | 2.4399    | 0.329329  | -0.106354  | 1.09744    | 2.21768   | 2.53931    |
| 3 | Nip7         | 0 | 0.590122  | 2.05082   | 2.36973    | 1.68043   | 0.844427  | -0.320879 | -0.271648  | -0.214072  | -0.169709 | 0.0404934  |
| 3 | Nmbr         | 0 | -0.402937 | -0.708553 | -0.288595  | 0.193458  | -1.38486  | -2.90272  | -2.22493   | -2.02175   | -1.43542  | -1.65658   |
| 3 | Nmrk1        | 0 | 0.728411  | 2.44242   | 2.72643    | 1.76089   | 1.17738   | 0.0366809 | 0.226783   | 0.0412865  | 0.131837  | 0.580953   |
| 3 | Nop58        | 0 | 0.60417   | 1.01884   | 1.5714     | 2.4848    | 3.07256   | 0.241591  | -0.0726987 | 0.507408   | 0.970721  | 0.776937   |
| 3 | Nos3         | 0 | 0.155944  | 0.509271  | 1.28483    | 3.45296   | 1.60941   | 1.67758   | 1.00601    | 0.883514   | 0.220043  | 0.295014   |
| 3 | Nostrin      | 0 | 2.83498   | 2.84044   | 1.38357    | 1.07796   | 2.20509   | 0.0484903 | 0.562913   | 0.637567   | 1.69922   | 1.41087    |
| 3 | Nphs1        | 0 | -0.511133 | -0.159991 | 1.02039    | -0.234409 | -0.775202 | -1.53932  | -1.83025   | -1.89532   | -1.51985  | -2.20439   |
| 3 | Npm3         | 0 | -0.177633 | 0.569767  | 0.747146   | 2.21663   | 3.10929   | 0.828842  | 0.484488   | 0.421241   | 0.494215  | -0.0203108 |
| 3 | Npr1         | 0 | 1.90578   | 1.89061   | 2.43034    | 2.7869    | 4.19134   | 2.56613   | 2.73118    | 1.88416    | 2.40745   | 1.91789    |
| 3 | Nptx2        | 0 | 0.880519  | 1.06764   | 0.941782   | 0.474157  | -0.740095 | -1.37085  | -1.71977   | -0.846506  | -1.22438  | -0.38932   |
| 3 | Nrap         | 0 | -0.075598 | 1.50133   | 1.44001    | 1.82571   | 2.52004   | 2.66395   | 2.47655    | 0.436186   | 0.520522  | 1.26553    |
| 3 | Nufip1       | 0 | -0.326677 | 0.419146  | 0.669932   | 0.811372  | 0.242658  | -0.203558 | -0.360691  | -0.228984  | 0.235399  | 3.17113    |
| 3 | Nup43        | 0 | 1.28392   | 0.818163  | 1.8308     | 2.22956   | 3.5011    | 2.29107   | 0.693045   | 1.05745    | 1.55216   | 2.63735    |
| 3 | Nup98        | 0 | 1.27253   | 2.14428   | 2.79375    | 2.54284   | -0.375211 | 0.701536  | 1.17221    | 0.691168   | 0.772325  | 1.58522    |
| 3 | Odc1         | 0 | 0.70145   | 1.39199   | 1.56433    | 3.51649   | 2.30137   | 0.455918  | 0.869697   | 0.528194   | 0.719007  | 0.715686   |
| 3 | Oip5         | 0 | 1.39163   | 2.5446    | 2.57142    | 2.12442   | 2.69781   | 1.41391   | 0.900051   | 0.280109   | 0.441832  | 0.534659   |
| 3 | Olfir613     | 0 | 1.12406   | 1.39507   | 1.02795    | 1.26695   | 1.08763   | -0.432584 | 0.121621   | -1.79863   | 0.110752  | -0.668658  |
| 3 | Olfir856-ps1 | 0 | 0.738587  | 0.171361  | -0.0352019 | 0.535945  | 0.520766  | -1.36643  | -1.29988   | -1.83489   | -1.1361   | -1.86285   |
| 3 | Osgin1       | 0 | 1.21216   | 1.08021   | 1.41734    | 3.35777   | 1.55147   | 1.28376   | 1.16293    | 1.24927    | -0.108855 | -0.262295  |
| 3 | Osmr         | 0 | 0.438856  | 2.27882   | 2.51965    | 3.28339   | 2.33929   | 2.45714   | 2.60834    | 1.68737    | 1.77986   | 1.02226    |
| 3 | P2ry2        | 0 | 1.36321   | 0.837658  | 1.49053    | 2.86512   | 3.12963   | 1.93882   | 1.88711    | 1.7237     | 1.74433   | -0.0295564 |
| 3 | Pappa        | 0 | 0.929165  | 1.05106   | 1.71205    | 2.37096   | 0.572768  | -1.10495  | 0.538203   | -0.463099  | 0.0020273 | -0.232016  |
| 3 | Pblid1       | 0 | 0.469133  | 2.12049   | 2.13855    | 1.48503   | 0.751663  | -0.537461 | -0.488103  | -0.519044  | -0.047074 | 0.36145    |
| 3 | Pcdhgb8      | 0 | 1.8054    | 1.20518   | 1.57097    | 2.45351   | 2.98164   | 0.258604  | 0.452517   | -0.158743  | 1.00812   | 1.17328    |
| 3 | Pcolce2      | 0 | 1.19714   | 1.68145   | 2.34517    | 0.547316  | 3.44838   | 1.02432   | 1.31896    | 0.391287   | 1.43862   | 2.3741     |
| 3 | Pdk4         | 0 | 2.32865   | 3.14015   | 2.28395    | 1.60746   | -0.098171 | 1.87293   | 1.03448    | 0.610756   | 1.22254   | 1.67557    |
| 3 | Pdpn         | 0 | 0.331053  | 1.13702   | 1.18104    | 2.59113   | 3.11619   | 2.4068    | 2.6513     | 1.84842    | 1.81684   | 1.03606    |

|   |          |   |           |           |           |          |           |           |            |            |            |            |
|---|----------|---|-----------|-----------|-----------|----------|-----------|-----------|------------|------------|------------|------------|
| 3 | Pecam1   | 0 | 0.335287  | 1.88369   | 2.82066   | 3.07919  | 1.96544   | 2.19539   | 1.55095    | 1.06797    | 0.77808    | 0.72639    |
| 3 | Pgf      | 0 | 1.03635   | 1.21239   | 1.69124   | 1.3306   | 3.41792   | 2.52202   | 1.25395    | 0.126688   | 0.933585   | 0.530387   |
| 3 | Pglyrp1  | 0 | 1.58789   | 1.98604   | 2.09618   | 1.54625  | 1.27207   | -0.17832  | 0.125101   | 0.0932796  | -0.728743  | -0.0509064 |
| 3 | Pgm1     | 0 | 0.809175  | 1.34854   | 2.19927   | 2.4174   | 3.39002   | 2.98329   | 2.31108    | 1.23832    | 1.53055    | 1.11036    |
| 3 | Phf13    | 0 | 2.30067   | 1.84274   | 2.70803   | 0.609703 | 0.219103  | 0.325678  | 0.561953   | -0.283756  | 1.45787    | 1.65466    |
| 3 | Piezo1   | 0 | 0.329297  | 0.800076  | 1.00788   | 2.34022  | 2.28465   | 2.69552   | 1.83111    | 0.388139   | 0.942906   | -0.147796  |
| 3 | Pik3r5   | 0 | -0.205463 | 1.05465   | 1.09262   | 1.47078  | 2.59011   | 2.33805   | 2.43101    | 0.700591   | 1.61208    | 0.0524432  |
| 3 | Pim1     | 0 | 1.55193   | 1.4731    | 1.90692   | 2.34345  | 2.43365   | 0.178554  | 1.66282    | -0.205589  | 0.673828   | -0.0922119 |
| 3 | Pisd-ps1 | 0 | -0.794784 | -0.246314 | -0.160496 | 0.439411 | 0.541969  | -1.43574  | -1.51661   | -2.25023   | -1.95802   | -1.7784    |
| 3 | Pla2g3   | 0 | 0.653971  | 1.25075   | 1.36875   | 0.724105 | 0.410031  | 0.256974  | -1.56017   | -1.12642   | -0.99067   | -0.832908  |
| 3 | Pla2g4b  | 0 | 0.372112  | 1.74486   | 1.98402   | 1.71248  | 1.50739   | -0.485728 | 0.0878056  | -0.915171  | 0.310102   | -0.102418  |
| 3 | Plagl2   | 0 | -0.426535 | 0.857985  | 2.64086   | 1.44623  | 1.96627   | 2.04367   | 2.14028    | 0.354298   | 1.0107     | 0.309309   |
| 3 | Plat     | 0 | 1.79709   | 3.02119   | 3.00024   | 1.8126   | 1.32288   | 2.42681   | 1.85314    | 0.829597   | 1.71171    | 0.200762   |
| 3 | Plaur    | 0 | 1.77287   | 2.18347   | 2.70586   | 2.8161   | 2.46233   | 1.77124   | 2.00939    | 0.423256   | 1.18775    | 0.231514   |
| 3 | Plin4    | 0 | 1.58867   | 1.8492    | 2.11451   | 1.68499  | -0.49682  | 1.02801   | 0.0366643  | -0.260099  | -0.26528   | -0.0863519 |
| 3 | Pmaip1   | 0 | 1.76306   | 2.92772   | 2.29518   | 2.89333  | 0.685762  | 0.729691  | 1.31155    | 0.69086    | 1.06622    | 0.40098    |
| 3 | Pmch     | 0 | 1.53591   | 1.05427   | 3.05955   | 2.76442  | 1.88853   | 2.28152   | 0.817344   | 1.64834    | 2.81519    | 3.00983    |
| 3 | Pnpla2   | 0 | 1.75643   | 1.94556   | 2.53221   | 1.40402  | 2.16363   | 1.70317   | 1.11182    | 0.549071   | 0.0203799  | -0.502221  |
| 3 | Pola2    | 0 | 0.629484  | 2.17712   | 2.44868   | 2.0485   | 1.82556   | 0.648403  | 0.0506008  | -0.0566971 | 0.0232481  | 0.233347   |
| 3 | Polr2l   | 0 | 0.207196  | 1.15355   | 1.46714   | 1.51502  | 1.67993   | -0.432955 | -0.844572  | -0.751815  | -0.67497   | -0.4361    |
| 3 | Pou4f1   | 0 | 2.10202   | 0.505178  | 1.82762   | 1.96517  | 2.419     | 1.59014   | -0.0627675 | 1.96223    | 3.00351    | 2.11966    |
| 3 | Ppp1r15a | 0 | 2.13324   | 2.04461   | 1.78149   | 1.88005  | 0.515291  | 0.0025992 | 0.208434   | -0.0129386 | -0.079216  | -0.40476   |
| 3 | Ppp1r15b | 0 | 0.530658  | 2.34401   | 3.39027   | 2.56583  | 1.59171   | 1.15589   | 1.28662    | 0.880517   | 0.828516   | 0.794038   |
| 3 | Ppp2r1b  | 0 | 0.0041003 | 1.41451   | 1.70985   | 2.60308  | 1.29567   | 1.39144   | 0.634484   | -0.108698  | -0.0814251 | -0.640407  |
| 3 | Pramel4  | 0 | 1.90954   | 2.60539   | 2.64221   | 1.99006  | 2.19896   | 0.631655  | 0.0904127  | 1.00839    | 0.262647   | 1.02075    |
| 3 | Prg4     | 0 | -1.06225  | 2.20483   | 1.54825   | 2.18181  | 0.449153  | 1.23112   | 0.678629   | 0.50558    | 1.35442    | -0.0581389 |
| 3 | Prkx     | 0 | 0.9712    | 2.05988   | 2.55579   | 2.21186  | 0.689465  | 1.48798   | 1.26901    | -0.10899   | 0.574395   | -0.474414  |
| 3 | Procr    | 0 | 0.314371  | 1.02175   | 1.48265   | 2.29731  | 2.3075    | 1.78065   | 1.32548    | -0.173511  | 0.467408   | -0.607368  |
| 3 | Prorsd1  | 0 | 1.08183   | 2.68939   | 3.11177   | 2.66038  | 3.34069   | 1.78731   | 1.46023    | 1.1015     | 1.55938    | 1.73131    |
| 3 | Prr11    | 0 | 0.887161  | 1.40947   | 1.74044   | 1.12196  | 2.46964   | 1.28271   | 0.12723    | -0.383287  | -0.393337  | -0.542169  |
| 3 | Ptbp1    | 0 | 0.435959  | 0.724829  | 1.72131   | 2.47663  | 2.92816   | 2.15241   | 1.97725    | 0.369268   | 1.02662    | 0.353892   |
| 3 | Ptcra    | 0 | 0.851369  | 1.49869   | 2.24989   | 1.8788   | 1.15879   | -0.359066 | -0.666235  | 0.43286    | 0.229945   | -0.588313  |
| 3 | Ptges    | 0 | 1.64013   | 1.93198   | 2.77648   | 3.34022  | 2.92025   | 1.76919   | 2.22664    | 1.01096    | 1.31181    | 0.754208   |
| 3 | Ptgs2    | 0 | 2.39727   | 1.55463   | 2.0379    | 1.49662  | -0.491252 | -0.219369 | -0.05119   | 0.337001   | 0.0598633  | 0.371284   |
| 3 | Ptx3     | 0 | 0.376772  | 1.79153   | 2.13506   | 3.49129  | 2.48793   | 2.08463   | 2.2045     | 2.06747    | 1.64315    | 0.80299    |
| 3 | Pvr      | 0 | 0.699908  | 1.74078   | 2.28579   | 2.67661  | 1.70457   | 0.578965  | 0.222338   | 0.0148469  | 0.200189   | -0.0415209 |
| 3 | Pvrl4    | 0 | 0.562719  | 0.46107   | 1.70097   | 0.8651   | 2.12454   | 2.45534   | 2.55979    | -0.440388  | 0.582359   | 0.938717   |
| 3 | Pxdc1    | 0 | 0.306283  | 1.98823   | 1.91161   | 2.683    | 2.96327   | 2.65423   | 1.66878    | 0.863971   | 1.27387    | 0.733577   |

|   |           |   |            |          |          |          |           |           |           |            |            |            |
|---|-----------|---|------------|----------|----------|----------|-----------|-----------|-----------|------------|------------|------------|
| 3 | Pxmp4     | 0 | 0.198544   | 1.28926  | 2.33261  | 0.314728 | 0.903529  | -0.434052 | -0.368394 | -0.517779  | -0.977317  | -0.848606  |
| 3 | Rab11fip1 | 0 | 1.23614    | 2.50546  | 2.81201  | 2.76417  | 3.16874   | 3.07434   | 3.23166   | 1.47444    | 2.32653    | 2.69223    |
| 3 | Rab20     | 0 | 0.969249   | 2.57258  | 2.32388  | 2.78738  | 3.4408    | 2.72536   | 3.30515   | 2.321      | 2.58545    | 2.06347    |
| 3 | Rab31     | 0 | 0.836576   | 2.22121  | 2.3194   | 1.61792  | 2.11572   | 3.10844   | 2.89854   | 1.15723    | 0.936711   | 0.554831   |
| 3 | Rab33b    | 0 | 0.418431   | 2.11116  | 2.4583   | 1.69985  | 0.821767  | -0.26001  | -0.33643  | -0.147474  | 0.0353816  | 0.233379   |
| 3 | Rabggta   | 0 | -0.0893897 | 0.872555 | 1.66449  | 1.61368  | 1.15113   | -0.772119 | -0.777313 | -0.815821  | -0.806548  | -0.484505  |
| 3 | Rai14     | 0 | 0.60544    | 1.93007  | 1.60326  | 2.9858   | 0.972134  | 2.23339   | 2.3254    | 0.484557   | 0.694387   | 0.0970177  |
| 3 | Rasip1    | 0 | 0.710579   | 1.13984  | 1.07864  | 2.64574  | 1.76028   | 0.431296  | -0.526988 | -0.475821  | -0.435752  | 0.380291   |
| 3 | Rassf1    | 0 | 2.37699    | 1.86602  | 2.51711  | 2.35419  | 0.34129   | 1.11381   | 1.05435   | -0.47158   | 1.23668    | 0.878986   |
| 3 | Rbbp8     | 0 | 0.618128   | 1.97133  | 1.5716   | 2.36462  | 3.57782   | 2.35464   | 2.87017   | 1.4464     | 2.04089    | 1.37552    |
| 3 | Rdh10     | 0 | 0.901855   | 2.00533  | 2.60263  | 4.08707  | 2.16288   | 1.87407   | 2.01892   | 1.80075    | 1.99863    | 1.78757    |
| 3 | Rel       | 0 | 1.40677    | 1.48282  | 2.06832  | 1.27419  | 0.785307  | 0.565653  | 2.08332   | 0.667848   | 0.435511   | -1.40648   |
| 3 | Rela      | 0 | 0.498244   | 0.390592 | 1.49715  | 2.33478  | 2.35617   | 2.55129   | 2.33978   | 0.713746   | 0.639239   | 0.184058   |
| 3 | Relb      | 0 | 1.63614    | 1.61826  | 2.42112  | 1.52594  | 3.09174   | 2.15725   | 3.37248   | 1.63475    | 1.50313    | 0.43256    |
| 3 | Rest      | 0 | -0.323416  | 0.802802 | 1.63003  | 1.57851  | 2.84434   | 1.95206   | 2.58593   | 0.802525   | 1.55456    | 0.613818   |
| 3 | Rft1      | 0 | 0.376863   | 2.08341  | 2.24605  | 1.33243  | 1.65524   | -0.117788 | 0.042697  | -0.38948   | -0.204763  | -0.164108  |
| 3 | Rgs1      | 0 | 2.30557    | 2.21992  | 2.50966  | 2.30582  | 2.92895   | 2.82083   | 2.91694   | 2.24596    | 3.14213    | 0.548702   |
| 3 | Rgs2      | 0 | 3.94944    | 2.06123  | 1.54018  | 0.870475 | 1.73069   | 1.24746   | 1.47332   | 1.35507    | 0.977642   | 0.688098   |
| 3 | Rhag      | 0 | 0.379284   | 1.55359  | 1.52352  | 1.08622  | 0.312666  | -0.732361 | -0.194767 | -0.765661  | -1.43546   | -0.833811  |
| 3 | Rhoj      | 0 | 0.969343   | 1.66839  | 1.92021  | 3.64289  | 2.2542    | 1.89981   | 1.02861   | 0.586362   | 1.0541     | 0.633011   |
| 3 | Ripk1     | 0 | -0.0243264 | 1.55791  | 1.08531  | 1.99598  | 2.48787   | 2.56288   | 2.63223   | 0.764841   | 1.61144    | 0.379824   |
| 3 | Ripply3   | 0 | -0.0381242 | 1.60013  | 2.02395  | 1.49893  | 1.04075   | -0.843731 | -0.665228 | -0.578359  | -0.104244  | 0.137114   |
| 3 | Rmi2      | 0 | 0.604567   | 1.69592  | 2.04581  | 1.52359  | 1.25777   | -0.274733 | -0.488582 | -0.469111  | -0.345933  | -0.542705  |
| 3 | Rn4.5s    | 0 | 0.925392   | 2.30335  | 2.6286   | 1.57002  | 1.10262   | -0.271134 | 0.317198  | -0.0048275 | 0.330322   | -0.0984324 |
| 3 | Rnf125    | 0 | 1.93509    | 3.06166  | 2.01751  | 3.80034  | 2.60893   | 1.38074   | 1.46977   | 1.32726    | 1.63721    | 1.65544    |
| 3 | Rnf207    | 0 | 2.06761    | 0.752231 | 2.33041  | 0.774908 | -0.250254 | 0.270584  | -0.469062 | -0.70164   | 0.0491837  | -0.33292   |
| 3 | Rnf225    | 0 | 0.445099   | 1.34746  | 1.88931  | 0.576831 | -0.604061 | -0.900292 | 0.243586  | -0.386106  | -0.472419  | -1.58277   |
| 3 | Rpl37rt   | 0 | 0.549843   | 2.10775  | 1.29151  | 0.112457 | 1.68016   | -0.232647 | -0.988564 | -0.587008  | -0.402328  | -0.35865   |
| 3 | Rplp2-ps1 | 0 | 0.678602   | 2.12427  | 2.39431  | 1.88026  | 1.07024   | -0.284033 | -0.12104  | -0.259554  | 0.0403226  | 0.405655   |
| 3 | Rrad      | 0 | 1.75679    | 2.69751  | 3.48133  | 0.83804  | 0.769258  | 0.86695   | 1.05059   | 0.624421   | 0.865626   | 1.31715    |
| 3 | Rrnad1    | 0 | 0.237931   | 1.09458  | 1.58066  | 0.790787 | 0.473298  | -0.691416 | -1.11673  | -1.08129   | -1.04356   | -1.2254    |
| 3 | S100a9    | 0 | 1.67361    | 1.73579  | 2.5612   | 2.81431  | 2.58607   | 0.634396  | 2.64828   | 1.24634    | 2.16553    | 0.324863   |
| 3 | Sap18     | 0 | 0.691055   | 2.02577  | 2.23779  | 1.72529  | 1.2844    | -0.283431 | -0.26079  | -0.214232  | -0.0939505 | -0.127564  |
| 3 | Sbno2     | 0 | 0.0804795  | 1.37034  | 1.49856  | 2.79907  | 2.33201   | 1.4648    | 1.39445   | 0.317541   | 0.326484   | -0.216205  |
| 3 | Scd3      | 0 | 0.785879   | 2.16741  | 2.27257  | 1.95505  | 0.738145  | -0.110976 | -0.216194 | -0.291341  | 0.0169655  | 0.0994422  |
| 3 | Scgb3a1   | 0 | 0.903102   | 1.19699  | 1.33869  | 2.4944   | 2.68213   | 1.59276   | 1.2501    | -0.336492  | -0.202875  | 0.609327   |
| 3 | Sdc1      | 0 | -0.579919  | 0.489649 | 0.778818 | 1.98654  | 2.67269   | 1.2539    | 1.71302   | 0.632861   | 1.3159     | -0.309727  |
| 3 | Sdcbp2    | 0 | 0.754002   | 0.735704 | 0.901279 | 2.6873   | -0.618727 | -0.717278 | -0.412301 | 0.498183   | -0.620641  | -0.129721  |

|   |           |   |            |            |            |           |            |            |            |           |            |            |
|---|-----------|---|------------|------------|------------|-----------|------------|------------|------------|-----------|------------|------------|
| 3 | Sele      | 0 | 1.17127    | 1.97126    | 3.36385    | 3.03633   | 1.98133    | 0.923442   | 1.53395    | 0.924102  | 0.705681   | 1.23768    |
| 3 | Selp      | 0 | 1.35968    | 2.07099    | 2.56439    | 2.60104   | 3.18213    | 1.90819    | 2.06406    | 1.5323    | 1.60076    | 0          |
| 3 | Sema3g    | 0 | 0.712319   | 1.12821    | 0.689118   | 3.24026   | -0.0354156 | 1.22953    | 0.146772   | -0.387131 | -0.0382043 | 0.847827   |
| 3 | Serinc5   | 0 | -0.0881799 | -0.0289436 | 0.926066   | 3.09611   | 1.68269    | 1.56867    | 2.04615    | 0.960079  | 0.807528   | 0.333762   |
| 3 | Serpine1  | 0 | 1.41747    | 1.70725    | 1.89416    | 2.58686   | 3.00261    | 1.76313    | 1.1101     | 0.575495  | 0.446452   | -0.012156  |
| 3 | Serpinh1  | 0 | 0.675401   | 0.822754   | 1.32216    | 2.79008   | 2.68009    | 2.44846    | 2.38936    | 1.10081   | 1.42895    | 0.193834   |
| 3 | Sertad1   | 0 | 2.02659    | 1.60943    | 0.869407   | 1.50675   | 1.9913     | -0.428063  | -0.0913704 | -0.398494 | -0.520456  | 0.652664   |
| 3 | Sesn2     | 0 | 1.31813    | 0.327348   | 1.10772    | 3.06608   | -0.581932  | 0.697394   | 0.309931   | -0.227693 | -0.123735  | 0.472906   |
| 3 | Setd8     | 0 | 0.200649   | 0.086536   | 0.984481   | 2.55357   | 0.704374   | 0.258841   | -0.167001  | -1.01708  | -0.667277  | -0.880883  |
| 3 | Sgk3      | 0 | 0.67022    | 2.2944     | 3.70728    | 1.5661    | 1.92363    | 2.37846    | 2.0718     | 1.34593   | 1.56929    | 0.765528   |
| 3 | Sgms2     | 0 | 1.56292    | 3.2645     | 2.87127    | 3.34722   | 0.915662   | 2.5331     | 2.4073     | 1.96365   | 2.40189    | 2.21962    |
| 3 | Sh2b2     | 0 | 0.728375   | 1.83909    | -0.144447  | 1.99313   | 1.41722    | 1.14331    | 1.69209    | -0.009809 | -0.641504  | -0.655784  |
| 3 | Sh3bgr    | 0 | 0.614935   | 1.19728    | 1.16327    | 2.01744   | 3.51577    | 0.340954   | 0.722492   | 1.24617   | 2.24318    | 1.82177    |
| 3 | She       | 0 | 0.567799   | 0.192953   | 1.68474    | 3.17589   | 2.82962    | 2.00716    | 1.46003    | 1.01253   | 1.22403    | 1.67417    |
| 3 | Shisa3    | 0 | 0.913158   | -0.0786815 | 0.458927   | 0.790488  | 1.69264    | -0.80386   | -1.26536   | -1.70205  | -0.0634099 | -0.591115  |
| 3 | Sik1      | 0 | 2.04913    | 1.75859    | 1.85809    | 1.0287    | 0.753465   | -0.874567  | -0.0151584 | -0.666226 | 1.06048    | 1.07364    |
| 3 | Ska3      | 0 | -0.52014   | 0.87166    | 1.2514     | 0.446499  | 2.2523     | 0.867004   | -0.107538  | -1.16913  | -0.922334  | 0.107758   |
| 3 | Slamf8    | 0 | -0.345431  | 0.570462   | 1.54203    | 1.38115   | 1.596      | 0.637309   | 2.17851    | 1.40009   | 1.43054    | -1.15102   |
| 3 | Slc10a1   | 0 | 0.607397   | 0.690256   | 1.059      | 0.648879  | 0.510709   | -0.48922   | -1.21704   | -1.12035  | -1.52755   | -1.60812   |
| 3 | Slc14a1   | 0 | -0.466608  | 0.308537   | 0.394194   | 2.56857   | 2.00487    | 2.1135     | 2.06808    | 1.09583   | 1.01653    | 0.570019   |
| 3 | Slc16a14  | 0 | -0.553058  | -0.476043  | -0.0396552 | 0.0565464 | -1.70443   | -2.50869   | -0.614747  | -1.83415  | -1.89439   | -2.47283   |
| 3 | Slc22a4   | 0 | 1.29917    | 1.6375     | 2.40778    | 3.1682    | 3.59452    | 2.91101    | 2.68886    | 1.83199   | 2.64007    | 2.41806    |
| 3 | Slc23a1   | 0 | 0.454894   | 1.67563    | 2.00358    | 1.35178   | 1.0775     | -0.155668  | -0.613909  | -0.608938 | -0.512584  | -0.648177  |
| 3 | Slc25a13  | 0 | 1.09848    | 2.79557    | 3.08751    | 1.61682   | 3.33816    | 2.4958     | 2.09833    | 2.11968   | 1.3164     | 1.12098    |
| 3 | Slc25a24  | 0 | -0.0369442 | 1.19776    | 1.52255    | 1.77862   | 2.91765    | 2.26238    | 1.57597    | 0.674756  | 2.12028    | 0.0527638  |
| 3 | Slc25a42  | 0 | 0.211435   | 0.0297767  | 0.655867   | -0.14035  | -1.22844   | -1.97805   | -1.49897   | -1.83034  | -1.77945   | -1.82153   |
| 3 | Slc35g1   | 0 | 0.762805   | 1.59541    | 2.91358    | 1.65043   | 1.25739    | 2.88184    | 2.12965    | 0.171403  | 1.79273    | 0.4861     |
| 3 | Slc39a14  | 0 | 0.486495   | 0.420495   | 1.0529     | 3.08512   | -0.842351  | -0.0143231 | 0.342167   | -0.119413 | 0.41427    | -0.0680929 |
| 3 | Slc3a2    | 0 | 0.490897   | 0.706264   | 1.11439    | 3.52949   | 1.93964    | 1.59443    | 2.08908    | 0.505114  | 0.803633   | 0.696928   |
| 3 | Slc4a11   | 0 | 1.70719    | 1.19024    | 2.80995    | 1.86588   | 1.18956    | 1.03052    | 0.525869   | -0.79942  | 0.457175   | 0.156134   |
| 3 | Slc5a3    | 0 | 1.24767    | 2.85755    | 2.70096    | 3.14288   | 1.24767    | 1.54759    | 0.705552   | 0.546312  | 1.51126    | 1.18582    |
| 3 | Slc7a1    | 0 | 0.676317   | 1.48251    | 1.34087    | 2.66666   | -0.39249   | -0.784735  | 0.0033037  | 0.128311  | -0.193934  | 0.285083   |
| 3 | Slfn10-ps | 0 | 0.53022    | 0.815562   | 0.987574   | 2.19833   | 2.90454    | 2.1316     | 1.93348    | 0.753057  | 1.51271    | -0.32262   |
| 3 | Slfn3     | 0 | -1.04343   | -0.602166  | 0.893798   | 1.76997   | 1.24903    | 0.613096   | 1.99699    | 1.17146   | 0.316251   | -0.546399  |
| 3 | Slfn5     | 0 | 0.338469   | 1.52954    | 1.77567    | 1.63761   | 2.90851    | 2.07481    | 2.94883    | 0.547296  | 1.29926    | 0.48695    |
| 3 | Smad6     | 0 | 0.0663232  | 0.608064   | 0.681367   | 3.52805   | 0.845491   | 1.90741    | 1.63979    | 1.05276   | 1.0851     | 0.465383   |
| 3 | Smim3     | 0 | 1.11428    | 1.42414    | 1.37834    | 1.55856   | 1.51311    | 0.281017   | 0.184174   | -0.421761 | -1.23317   | -0.772555  |
| 3 | Snhg1     | 0 | 0.979184   | 1.66276    | 2.25981    | 3.2521    | 1.87416    | 0.733476   | 0.115717   | 0.464543  | 0.771156   | 0.555073   |

|   |         |   |            |           |           |           |           |            |           |            |            |            |
|---|---------|---|------------|-----------|-----------|-----------|-----------|------------|-----------|------------|------------|------------|
| 3 | Snhg12  | 0 | 0.326496   | 1.73142   | 2.09031   | 2.61746   | 1.91311   | 0.17751    | 0.360995  | 0.167015   | 0.671326   | -0.273082  |
| 3 | Snhg17  | 0 | -0.133192  | 0.790503  | 1.42356   | 1.90576   | 0.66173   | -1.09612   | -0.844678 | -0.427763  | -0.174744  | -1.10602   |
| 3 | Snhg5   | 0 | 1.06805    | 1.71      | 2.36767   | 3.16854   | 2.62054   | 0.492365   | 0.621572  | 0.971321   | 0.691828   | 1.80758    |
| 3 | Snhg6   | 0 | 0.65763    | 1.24149   | 1.73083   | 1.47357   | 2.88157   | 0.319789   | -0.220466 | -0.129059  | 0.126341   | -0.188744  |
| 3 | Snord22 | 0 | 0.100709   | 1.74394   | 1.92035   | 1.67274   | 1.84855   | 0.479223   | -0.374885 | -0.267184  | -0.713954  | 0.169031   |
| 3 | Snx18   | 0 | -0.0695028 | 1.39771   | 2.01091   | 1.81691   | 2.45822   | 2.75045    | 2.52841   | 1.1973     | 1.20609    | 0.377828   |
| 3 | Soat2   | 0 | 0.577768   | 1.7616    | 2.04172   | 1.6542    | 1.67484   | -0.0420829 | -0.266566 | -0.30814   | -0.527745  | -0.23171   |
| 3 | Socs3   | 0 | 1.09583    | 1.47499   | 1.96423   | 2.73283   | 2.34485   | 1.14451    | 1.28418   | 0.579234   | 0.390057   | -0.598359  |
| 3 | Sox7    | 0 | 2.66108    | 3.30594   | 3.53966   | 2.40112   | 1.816     | 2.27304    | 1.51247   | 1.32961    | 1.48103    | 1.48557    |
| 3 | Spc24   | 0 | 0.417907   | 0.750419  | 0.888263  | 0.444676  | 1.9437    | -0.205693  | -0.795909 | -1.39404   | -0.882519  | -1.04918   |
| 3 | Sphk1   | 0 | -0.497576  | 0.0372254 | 0.0690824 | 3.33123   | 0.188083  | 0.176144   | 0.824715  | 0.452425   | 0.394638   | 0.356077   |
| 3 | Spry1   | 0 | 0.0902235  | 1.13051   | 2.15872   | 2.99254   | 2.86993   | 1.57665    | 1.10738   | 1.05955    | 0.791619   | 0.729984   |
| 3 | Spry4   | 0 | -0.489837  | 2.18174   | 2.76575   | 1.84898   | 0.801385  | 0.494216   | 0.0842802 | 0.45237    | 1.25448    | 1.24249    |
| 3 | Spsb1   | 0 | 1.55213    | 1.69746   | 1.54302   | 1.89873   | 2.70764   | 2.14536    | 0.800479  | -0.0638296 | 0.0013393  | 0.0649197  |
| 3 | Spty2d1 | 0 | 1.64928    | 2.47431   | 2.93867   | 1.73058   | -0.478779 | 0.635176   | 1.66504   | 1.24878    | 1.72876    | 1.58809    |
| 3 | Srgn    | 0 | 0.454554   | 0.856206  | 1.65298   | 2.47633   | 3.21712   | 2.08712    | 2.42711   | 1.33529    | 1.83712    | 0.50818    |
| 3 | Srp54c  | 0 | 1.86008    | 2.10784   | 1.97557   | 0         | 2.10636   | 0          | 1.7874    | 0          | 0.470086   | 0          |
| 3 | Srxn1   | 0 | 0.736732   | 1.23218   | 1.92149   | 2.25812   | 0.126303  | -0.471601  | -0.373226 | -0.44596   | -0.519336  | -0.123033  |
| 3 | St8sia5 | 0 | -0.206352  | -0.278034 | -0.260698 | -0.446532 | -0.855484 | -1.7076    | -1.72008  | -1.16431   | -3.2612    | -1.93795   |
| 3 | Stat3   | 0 | 0.561187   | 1.34964   | 1.57445   | 3.14908   | 2.34703   | 1.85306    | 1.87701   | 0.80158    | 0.641373   | -0.0615665 |
| 3 | Stc2    | 0 | -0.0909774 | 1.45062   | 2.05038   | 1.78583   | -0.976075 | -0.669189  | -0.363318 | 0.0021881  | 0.425008   | 0.0513204  |
| 3 | Steap1  | 0 | 0.138543   | 1.45117   | 1.70824   | 2.87047   | 2.96769   | 2.19851    | 2.10198   | 2.38334    | 2.29384    | 2.57289    |
| 3 | Stk40   | 0 | 0.155639   | 1.06094   | 1.71188   | 1.80149   | 1.01375   | -0.80226   | -0.693379 | -0.935548  | -0.535746  | -0.101877  |
| 3 | Stra6   | 0 | -0.21596   | 0.0599765 | 1.1324    | 2.95802   | 1.29086   | 0.58275    | 0.452783  | -0.695615  | -0.0678916 | 0.0357015  |
| 3 | Stx11   | 0 | 2.18239    | 2.67002   | 3.25678   | 2.98645   | 3.74444   | 2.73762    | 3.12067   | 2.53801    | 3.03495    | 1.75306    |
| 3 | Stxbp2  | 0 | 0.552855   | 2.12327   | 3.07767   | 1.84827   | 1.70266   | 1.13486    | 0.943798  | 0.135535   | 0.520231   | -0.0482135 |
| 3 | Sult1a1 | 0 | 0.955658   | 1.25771   | 2.30793   | 0.893483  | -0.808915 | 1.48049    | -0.272926 | -0.73934   | 0.118994   | -0.289966  |
| 3 | Swap70  | 0 | 0.745536   | 2.10499   | 2.10815   | 2.97631   | 2.41388   | 2.97915    | 3.29534   | 1.34415    | 1.53835    | 1.78943    |
| 3 | Syde1   | 0 | -0.490586  | 0.216513  | 0.694869  | 2.31513   | 2.89278   | 1.63796    | 1.21645   | 0.779947   | 1.18063    | 0.52649    |
| 3 | Synpo2  | 0 | -0.448806  | 0.149105  | 0.719581  | -0.367996 | -1.31328  | -1.18009   | -1.14618  | -1.99754   | -2.06046   | -2.35587   |
| 3 | Synpo2l | 0 | 0.263377   | 1.34689   | 1.65032   | 0.352212  | 1.77981   | -0.229001  | -1.04868  | -0.348013  | -1.08999   | -0.358448  |
| 3 | Synrg   | 0 | 0.454817   | 1.77654   | 2.40858   | 1.77931   | -0.194729 | -0.261104  | -0.195813 | -0.277438  | -0.167122  | 0.0037224  |
| 3 | Tagln2  | 0 | 0.421489   | 0.875119  | 1.18361   | 2.29732   | 3.34892   | 2.20966    | 1.66116   | 0.533141   | 1.11403    | 0.543695   |
| 3 | Tapbp1  | 0 | 0.836632   | 2.64067   | 3.45373   | 1.93797   | 1.31055   | 1.21117    | 1.72059   | 0.706823   | 0.706211   | 0.643181   |
| 3 | Tc2n    | 0 | 1.07032    | 2.45175   | 2.38782   | 2.38146   | 1.75449   | 0.529775   | 0.179307  | 0.0877905  | 0.186379   | 0.632812   |
| 3 | Tcaf2   | 0 | 0.463503   | 1.6216    | 2.52015   | 2.47954   | 3.06969   | 3.06446    | 2.75066   | 2.25551    | 2.17771    | 2.32568    |
| 3 | Tead1   | 0 | 0.550359   | 2.68335   | 3.24374   | 2.53387   | 1.86197   | 2.19417    | 1.93185   | 0.772456   | 1.4972     | 0.967355   |
| 3 | Tes     | 0 | 0.618569   | 1.07901   | 1.38285   | 1.92693   | 3.24722   | 2.44177    | 2.16582   | 0.380496   | 1.43231    | 0.434794   |

|   |             |   |            |           |            |           |          |            |            |            |           |            |
|---|-------------|---|------------|-----------|------------|-----------|----------|------------|------------|------------|-----------|------------|
| 3 | Tex15       | 0 | 0.0750355  | 1.4537    | 2.0414     | 3.49962   | 1.83322  | 0.883116   | 0.400645   | 1.14882    | 1.27166   | 0.89341    |
| 3 | Tfcp2l1     | 0 | 1.57335    | 3.01004   | 3.70652    | 1.83465   | 1.57923  | 2.86443    | 2.54549    | 1.96696    | 1.27074   | 1.67819    |
| 3 | Tgm1        | 0 | -0.0162094 | 0.935586  | 1.25005    | 2.6858    | 2.83263  | 2.34326    | 2.26624    | 1.88541    | 1.74361   | 0.87532    |
| 3 | Tgm2        | 0 | 0.411689   | 1.20366   | 1.61499    | 2.76474   | 3.05163  | 2.31614    | 1.99672    | 0.89361    | 1.549     | 0.412856   |
| 3 | Th          | 0 | 1.3858     | 0.549704  | 0.48534    | 0.891818  | 2.1672   | -0.769912  | -1.03188   | -0.61847   | -0.286058 | -0.59834   |
| 3 | Thbd        | 0 | 0.978841   | 2.11803   | 2.76701    | 2.7745    | 0.622636 | 2.02085    | 2.41611    | 1.26593    | 2.50089   | 0.446045   |
| 3 | Thbs1       | 0 | 1.63581    | 1.40481   | 1.80956    | 2.4993    | 3.62994  | 3.14459    | 2.65812    | 1.72603    | 2.37158   | 1.21558    |
| 3 | Themis      | 0 | 0.901902   | 1.93367   | 2.85185    | 2.2661    | 1.44307  | 0.480226   | 1.20229    | 0.605867   | 0.793439  | -0.567268  |
| 3 | Thoc6       | 0 | 0.973873   | 1.39686   | 0.906507   | 2.48061   | 2.84528  | 2.32614    | 1.57255    | 1.58131    | 1.23807   | -0.454054  |
| 3 | Timeless    | 0 | 0.268468   | 0.764439  | 1.0243     | 1.78867   | 2.79377  | 1.75066    | 0.986998   | 0.156069   | 0.113796  | -0.700349  |
| 3 | Timp1       | 0 | 0.23089    | 1.43582   | 1.55089    | 2.3352    | 2.74824  | 1.90403    | 1.791      | 1.15778    | 1.1378    | -0.513523  |
| 3 | Tinagl1     | 0 | 2.82994    | 2.13456   | 2.51953    | 1.80888   | 0.341538 | 0.972363   | 0.623927   | 0.502242   | 0.306361  | 0.4534     |
| 3 | Tiparp      | 0 | 2.63896    | 3.32      | 2.81658    | 2.67774   | 1.74966  | 1.2842     | 0.996328   | 0.798381   | 1.86338   | 1.97103    |
| 3 | Tirap       | 0 | 0.304479   | 1.71167   | 2.66438    | 1.78138   | 1.76709  | 0.871257   | 0.659129   | 0.0377863  | 0.261315  | -0.631336  |
| 3 | Tm4sf1      | 0 | 0.539644   | 0.902889  | 1.85857    | 2.98843   | 3.42651  | 2.10254    | 1.69402    | 1.23616    | 1.72587   | 1.29672    |
| 3 | Tma16       | 0 | 0.772156   | 2.2471    | 1.7507     | 2.59663   | 0.54034  | -0.0423038 | -0.206023  | 0.0488973  | 0.174006  | 0.133319   |
| 3 | Tmbim1      | 0 | 0.762806   | 1.6088    | 1.63541    | 3.25714   | 3.17753  | 2.63944    | 2.45479    | 1.29933    | 1.5968    | 1.38243    |
| 3 | Tmco4       | 0 | 0.786977   | 1.79505   | 2.50302    | 2.79672   | 2.47877  | 2.88049    | 3.16498    | 1.5286     | 1.82316   | 0.932488   |
| 3 | Tmem181c-ps | 0 | -0.414008  | -0.341403 | -0.0092236 | -0.015086 | 0.623057 | -1.81535   | -1.88833   | -1.94443   | -2.28635  | -0.781777  |
| 3 | Tmem252     | 0 | 1.48657    | 2.11275   | 1.74386    | 2.34926   | 2.21156  | 1.20326    | 0.474343   | 0.0543669  | 0.448772  | -0.483412  |
| 3 | Tmem39a     | 0 | 0.589463   | 1.38629   | 2.44261    | 1.25528   | 1.22222  | 1.91772    | 1.04333    | 0.838185   | 0.96171   | 3.71093    |
| 3 | Tmem69      | 0 | 0.475341   | 1.82026   | 2.32362    | 1.72419   | 1.09917  | -0.460868  | -0.249324  | -0.305148  | -0.155757 | -0.0539245 |
| 3 | Tmem88b     | 0 | -0.331422  | -0.2466   | 0.589774   | 2.76509   | 1.29913  | 1.12009    | 1.17759    | 0.716964   | 1.08365   | 2.47583    |
| 3 | Tmod3       | 0 | 0.76085    | 1.71058   | 1.9507     | 2.50135   | 2.53804  | 3.2267     | 2.83757    | 1.51304    | 1.7934    | 0.603972   |
| 3 | Tnc         | 0 | 0.275083   | 0.805491  | 0.984989   | 2.59427   | 2.84025  | 0.969723   | 1.00028    | 0.0883374  | 0.574731  | -0.269959  |
| 3 | Tnfaip6     | 0 | 2.39096    | 2.42254   | 3.68929    | 2.70077   | 1.74438  | 1.16706    | 2.5918     | 1.82134    | 1.58205   | 0.957454   |
| 3 | Tnfrsf10b   | 0 | 0.806326   | 0.206191  | 0.224167   | 0.343885  | 1.11394  | -1.25883   | -0.732077  | -1.85794   | -1.62532  | -0.98652   |
| 3 | Tnfrsf12a   | 0 | 1.28371    | 1.53876   | 2.08886    | 2.70833   | 2.14756  | 0.611852   | 0.608414   | -0.146244  | 0.0781813 | 0.139161   |
| 3 | Tnfrsf1a    | 0 | 0.325273   | 1.10412   | 1.23278    | 2.4562    | 2.96458  | 2.34973    | 2.30499    | 1.00847    | 1.12203   | 0.277369   |
| 3 | Tnnc1       | 0 | 0.660933   | 0.200705  | 0.669712   | 0.478409  | 0.718858 | -1.15665   | -1.77336   | -0.891006  | -2.00135  | -0.375086  |
| 3 | Tnnt1       | 0 | 0.244955   | 0.172754  | 0.375461   | -0.75268  | 0.903598 | -0.974791  | -1.82527   | -1.46401   | -2.00759  | -1.45243   |
| 3 | Tor4a       | 0 | 0.653118   | 2.19658   | 2.58759    | 2.15243   | 1.66251  | 0.351548   | 0.141776   | -0.0486719 | 0.318589  | 0.30636    |
| 3 | Tpm4        | 0 | 1.77525    | 2.3219    | 2.2082     | 2.93755   | 3.4772   | 2.83388    | 2.16494    | 1.01812    | 1.5882    | 1.03989    |
| 3 | Tppp3       | 0 | 2.14643    | 2.57931   | 3.10996    | 1.43891   | 3.52992  | 1.45136    | 1.02713    | 1.35291    | 1.66325   | 1.28988    |
| 3 | Trh         | 0 | 2.242      | 1.50064   | 1.3988     | 1.90561   | 3.31588  | 0.776054   | 0.468625   | 0.459815   | 2.51177   | 1.69589    |
| 3 | Trib1       | 0 | 0.395703   | 1.39362   | 1.94226    | 2.43637   | 2.35076  | 0.351899   | 0.121259   | -0.26974   | 0.105009  | 0.372743   |
| 3 | Trim16      | 0 | 2.08664    | 2.84849   | 2.70501    | 2.54383   | 1.2039   | 1.46176    | 0.854318   | 0.151455   | 1.53205   | 0.639475   |
| 3 | Trim72      | 0 | 0.230299   | 0.623837  | 1.3476     | 0.741792  | 0.647692 | 0.377542   | -0.0118427 | -0.821079  | -2.40479  | -0.42504   |

|   |             |   |           |            |            |           |           |           |            |            |           |           |
|---|-------------|---|-----------|------------|------------|-----------|-----------|-----------|------------|------------|-----------|-----------|
| 3 | Trip10      | 0 | 1.84437   | 3.10743    | 3.30162    | 2.56011   | 2.53583   | 3.08231   | 2.49587    | 0.91594    | 2.04472   | 1.70095   |
| 3 | Trmt10c     | 0 | 0.335414  | 1.70679    | 3.12476    | 2.83428   | 0.416923  | 0.925708  | 0.660522   | 0.958819   | 1.61989   | 1.24632   |
| 3 | TrmH        | 0 | -1.66594  | -1.25144   | 0.0838964  | 0.0122834 | -0.522733 | -1.90313  | -2.71618   | -2.40454   | -1.66613  | -1.78     |
| 3 | TrmN        | 0 | -0.538265 | -0.0077574 | 0.278346   | 0.153099  | 0.802755  | -1.60737  | -2.36746   | -1.72103   | -1.23508  | -0.171693 |
| 3 | TrmP        | 0 | -0.517763 | -0.0692723 | 0.279157   | 0.425313  | 0.363919  | -1.47812  | -2.50378   | -1.83697   | -1.37439  | -0.302317 |
| 3 | Trmp1       | 0 | 0.206908  | 0.0418448  | 0.536039   | -0.29582  | 1.14379   | -1.46     | -2.18582   | -0.926164  | -1.33663  | -1.20318  |
| 3 | TrmV        | 0 | -0.429408 | 0.460617   | 0.101002   | 0.347949  | 0.204649  | -1.62361  | -2.21004   | -1.73476   | -1.61489  | -1.40302  |
| 3 | TrmW        | 0 | -0.577635 | -0.535954  | -0.292493  | -0.289175 | 0.282092  | -2.01616  | -2.81061   | -1.79804   | -1.7503   | -1.68273  |
| 3 | TrmY        | 0 | -0.250723 | -0.142737  | 0.82777    | 1.18364   | 0.88937   | -1.02845  | -2.28104   | -0.449471  | -0.827248 | -0.805401 |
| 3 | Tspan15     | 0 | 1.29759   | 2.59957    | 3.3748     | 2.51974   | 2.44926   | 1.03726   | 1.41568    | 0.981679   | 0.77269   | 1.13638   |
| 3 | Ttf1        | 0 | 0.774719  | 2.22792    | 2.87316    | 2.12367   | 0.902595  | 0.555129  | 0.505233   | -0.216841  | 0.503394  | 0.285661  |
| 3 | Tubb6       | 0 | 1.22293   | 1.69015    | 2.20241    | 2.85294   | 3.17009   | 1.93968   | 1.6941     | 0.457473   | 1.09646   | 0.474543  |
| 3 | Txnrd1      | 0 | -0.325072 | 0.886871   | 1.91098    | 3.44827   | 0.937401  | 1.00545   | 1.10059    | 0.564329   | 0.868028  | 0.568395  |
| 3 | Ubc         | 0 | 0.368306  | 1.25177    | 2.187      | 2.20727   | -0.582944 | 0.429395  | 0.689881   | -0.16302   | -0.187782 | -0.631697 |
| 3 | Ucn2        | 0 | 0.473833  | 0.736157   | 0.856339   | 2.08353   | 1.60759   | 0.361212  | -0.086888  | -0.725444  | -1.50987  | 0.0980297 |
| 3 | Upp1        | 0 | 0.893014  | 1.76917    | 2.02096    | 3.4357    | 3.12833   | 2.65509   | 2.24338    | 1.38309    | 2.62187   | 1.63244   |
| 3 | Uspl1       | 0 | 0.0991281 | 1.25622    | 2.4026     | 1.4148    | -1.11946  | -0.419785 | -0.367547  | -0.0403289 | 0.151927  | -0.118819 |
| 3 | Utp14b      | 0 | 2.80981   | 3.34902    | 2.97374    | 1.50905   | 1.17691   | 1.18712   | 0.932172   | 1.60278    | 2.11937   | 2.27137   |
| 3 | Veph1       | 0 | 0.500689  | 1.58153    | 1.88295    | 0.924913  | 0.899367  | -0.454541 | -0.833087  | -1.02469   | -0.659964 | -0.418474 |
| 3 | Vipr2       | 0 | 0.550118  | -0.0781966 | 0.493189   | 0.3738    | 0.877404  | -1.49042  | -1.32525   | -0.970022  | -2.09678  | -1.15667  |
| 3 | Vmn1r58     | 0 | 1.06169   | 0.865978   | 0.9692     | 0.56889   | 1.96599   | -0.577105 | -0.810062  | -0.749118  | -1.07854  | -0.700182 |
| 3 | Vmn2r55     | 0 | 0.598776  | 0.314326   | 0.284523   | 0.245658  | 1.47082   | -0.906721 | -0.72552   | -1.35256   | -1.21097  | -1.86993  |
| 3 | Vmn2r-ps129 | 0 | 0.0024225 | 1.4033     | 1.57266    | 1.40174   | 1.04892   | -0.643377 | -0.674928  | -1.04831   | -0.538611 | -0.726349 |
| 3 | Wdfy1       | 0 | -0.46721  | -0.051321  | 0.0651853  | 1.40213   | 0.12439   | -1.16535  | -1.54228   | -1.72062   | -1.56283  | -1.57787  |
| 3 | Wdr34       | 0 | 0.627909  | 1.95202    | 2.16445    | 1.48579   | 1.3074    | -0.589229 | -0.0754414 | -0.188409  | -0.192289 | -0.390706 |
| 3 | Wdr92       | 0 | 1.70199   | 2.87708    | 2.75758    | 2.50681   | 1.84382   | 0.650912  | 0.526157   | 0.740581   | 0.913734  | 0.686241  |
| 3 | Wisp1       | 0 | 0.326768  | 0.94252    | 1.8879     | 1.14171   | 0.784009  | -0.604309 | -0.688586  | -0.681254  | -1.53389  | -0.197046 |
| 3 | Wnt4        | 0 | -0.162677 | 0.252263   | -0.0479803 | -0.957746 | 0.0762544 | -2.2644   | -1.7505    | -1.92585   | -1.98246  | -1.83349  |
| 3 | Wnt9b       | 0 | -0.339855 | -0.383776  | -0.161766  | -0.148018 | -0.457743 | -1.59391  | -2.2164    | -1.81132   | -2.89354  | -1.65212  |
| 3 | Wwtr1       | 0 | 0.331434  | 1.98976    | 2.11734    | 3.53881   | 2.25657   | 2.66876   | 2.10907    | 1.39314    | 2.06768   | 1.4154    |
| 3 | Xaf1        | 0 | 0.510161  | 2.52922    | 2.89373    | 2.36132   | 1.6945    | 0.945858  | 1.18427    | 0.344404   | 0.437502  | 0.506449  |
| 3 | Xcr1        | 0 | 1.75424   | 2.18181    | 2.35767    | 1.52875   | 2.0884    | 0.391907  | 1.29362    | -0.196748  | 0.199204  | -0.104414 |
| 3 | Ybx3        | 0 | 0.358534  | 0.295617   | 0.915738   | 3.10739   | 2.84416   | 1.55927   | 1.06922    | 0.803305   | 1.03722   | 0.642316  |
| 3 | Zc3h12a     | 0 | 0.634382  | 1.81525    | 2.19015    | 1.56287   | 1.23011   | -0.209458 | -0.205751  | -0.255054  | -0.258324 | -0.660535 |
| 3 | Zc3h12d     | 0 | 1.98933   | 2.09733    | 2.78844    | 2.51024   | 3.53757   | 3.1537    | 3.37744    | 1.74805    | 3.14607   | 2.25427   |
| 3 | Zfand4      | 0 | 1.56484   | 1.7544     | 2.97672    | 2.76305   | 1.1151    | 2.82029   | 0.10882    | 1.13659    | 1.52118   | 1.64048   |
| 3 | Zfp202      | 0 | 0.355894  | 2.01873    | 2.38488    | 1.8271    | 1.30352   | 0.0597603 | -0.321067  | -0.0904698 | 0.0465917 | -0.124692 |
| 3 | Zfp36       | 0 | 2.12719   | 1.23049    | 1.88743    | 2.65491   | 0.991038  | 1.16231   | 1.06394    | -0.152358  | 0.109396  | -0.417441 |



|   |                |   |            |            |            |            |           |            |            |            |           |            |
|---|----------------|---|------------|------------|------------|------------|-----------|------------|------------|------------|-----------|------------|
| 3 | Zfp408         | 0 | 0.193256   | 1.50852    | 2.67589    | 0.966898   | 0.239816  | -0.0228322 | 0.213165   | -0.598948  | -0.503987 | -0.611671  |
| 3 | Zfp488         | 0 | 1.36184    | 0.564929   | 1.12798    | 0.598573   | 1.34915   | -0.427059  | -0.270715  | -1.80115   | -0.538631 | -0.837304  |
| 3 | Zfp597         | 0 | -0.07776   | 1.33504    | 2.21313    | 0.818309   | -1.45576  | -0.52208   | -0.515443  | -0.348919  | 0.0825865 | 0.470711   |
| 3 | Zfp607         | 0 | 0.720034   | 2.14947    | 2.65568    | 2.1691     | 1.46702   | 0.134846   | 0.256139   | -0.0235459 | 0.305204  | 0.283973   |
| 3 | Zfp626         | 0 | 0.518931   | 1.57988    | 2.79543    | 2.55391    | 1.31776   | -0.0221726 | -0.0157162 | 0.262656   | 0.726184  | 0.890594   |
| 3 | Zfp78          | 0 | 1.06956    | 1.84952    | 3.01243    | 2.33447    | 0.518738  | -0.129234  | 0.0757928  | 0.726879   | 0.867453  | 1.05024    |
| 3 | Zfp9           | 0 | 0.480447   | 1.62255    | 2.06012    | 0.916971   | -1.53325  | -0.48234   | -0.170279  | -0.168092  | -0.208975 | 0.222811   |
| 3 | Zfp935         | 0 | 0.733284   | 1.36501    | 1.97998    | 1.69105    | 1.02915   | -0.748804  | -0.599067  | -0.631617  | -0.49774  | 0.173088   |
| 3 | Zic3           | 0 | 1.61713    | 1.35893    | 3.10495    | 1.47442    | 3.23801   | 2.49296    | 0.568653   | 1.59603    | 2.58018   | 1.90064    |
| 4 | Sept1          | 0 | 0.251994   | -0.491156  | 0.849221   | 0.669268   | 1.59688   | 1.14732    | 2.57794    | 1.81443    | 2.6208    | 0.909836   |
| 4 | Sept2          | 0 | 0.141453   | 0.554192   | 1.29081    | 2.03015    | 2.16468   | 2.78173    | 3.02984    | 1.65745    | 2.02756   | 1.62306    |
| 4 | Sept10         | 0 | -0.154732  | 0.359333   | 0.566968   | 1.46866    | 2.51048   | 2.59462    | 2.40807    | 1.77246    | 1.53541   | 1.63065    |
| 4 | 1500015O10Rik  | 0 | 1.26423    | 1.08052    | 1.5897     | 1.96278    | 2.65429   | 2.645      | 2.72999    | 2.35554    | 3.63966   | 2.51885    |
| 4 | 1700003M02Rik  | 0 | 0.640993   | 0.520795   | 1.04431    | 1.07447    | -0.11418  | 1.50106    | 1.75074    | 1.1828     | 3.0133    | -0.606427  |
| 4 | 1700026D08Rik  | 0 | 0.163763   | 0.61361    | 0.794817   | 0.193418   | 2.20512   | 1.46266    | 1.87924    | 1.60154    | 2.72696   | 2.62658    |
| 4 | 1700040L02Rik  | 0 | 0.494242   | -1.10726   | 0.727289   | 0.949242   | 0.786345  | 1.10121    | 1.16881    | 2.16189    | 2.24203   | 2.12296    |
| 4 | 1700084C01Rik  | 0 | 1.01731    | 0.877561   | 1.18919    | 1.96975    | 2.0711    | 3.24616    | 3.02609    | 2.56531    | 2.60348   | 2.0295     |
| 4 | 2010320M18Rik  | 0 | 0.398326   | -0.143864  | 0.909728   | 0.769534   | 1.79855   | 2.30476    | 1.47026    | 2.74347    | 1.77781   | 2.47617    |
| 4 | 2610020H08Rik  | 0 | 1.05655    | 2.18613    | 1.591      | 2.08472    | 2.3986    | 3.25543    | 3.37459    | 1.28205    | 2.19305   | 1.0297     |
| 4 | 2610306M01Rik  | 0 | 0.863291   | -0.0644491 | -0.42735   | -0.019383  | 1.01207   | 0.0939829  | 0.725317   | 0.990716   | 1.54263   | 3.11917    |
| 4 | 2810459M11Rik  | 0 | -0.956657  | -0.190569  | -0.527478  | 0.564414   | 1.98518   | 1.63506    | 1.54842    | 1.26792    | 1.57311   | 1.04962    |
| 4 | 3110001I22Rik  | 0 | 0.466542   | 1.27397    | 1.94316    | 2.21474    | 0.66265   | 2.64622    | 0.433933   | 2.50791    | 2.26008   | 2.59626    |
| 4 | 4632428N05Rik  | 0 | -0.254505  | -0.357781  | -0.447533  | -0.230178  | 1.20582   | 2.00083    | 2.44494    | 0.99341    | 0.84725   | 0.0844334  |
| 4 | 4931406C07Rik  | 0 | -0.923447  | -0.329049  | -0.0284274 | -0.0555736 | 1.1799    | 2.5108     | 1.80649    | 0.490029   | 0.432714  | 0.0030079  |
| 4 | 4932438H23Rik  | 0 | 2.31768    | 1.8026     | 1.92594    | 3.1966     | 2.82542   | 2.94795    | 2.48266    | 2.68192    | 3.96576   | 2.40931    |
| 4 | 5031414D18Rik  | 0 | 0.749783   | 0.929767   | 0.861428   | 0.983951   | 1.86807   | 3.08435    | 3.09895    | 1.31124    | 0.473704  | 0.909741   |
| 4 | 5430427O19Rik  | 0 | -0.383217  | 0.230545   | 0.12331    | 0.212908   | 2.07936   | 2.2676     | 2.29533    | 1.18164    | 1.61544   | 0.428194   |
| 4 | 9330117O12Rik  | 0 | 0.0311279  | 0.245962   | -0.401051  | -0.439881  | -2.15997  | 0.741644   | 1.38957    | 1.35452    | 0.409045  | 0.910914   |
| 4 | 9630013A20Rik  | 0 | 0.265473   | 0.130522   | 0.668268   | 0.734034   | -0.532031 | 2.20531    | 1.21236    | 0.626433   | 0.0235003 | -1.75553   |
| 4 | 9930111J21Rik1 | 0 | -0.618339  | 0.445541   | 0.373029   | 0.605037   | 1.27967   | 2.28275    | 2.8709     | 1.07116    | 1.34879   | 0.514163   |
| 4 | 9930111J21Rik2 | 0 | -0.741383  | -0.617842  | -0.488179  | -0.474807  | 0.0341162 | 0.913009   | 1.17338    | -0.0495779 | 0.300833  | -2.62765   |
| 4 | A230001M10Rik  | 0 | 1.18579    | 1.09667    | 0.476648   | -0.177223  | -1.40646  | -0.366348  | 1.65089    | 1.36681    | 1.37056   | 1.69208    |
| 4 | A2m            | 0 | 0.119028   | 1.0524     | 1.59906    | 2.62928    | 2.44936   | 2.59447    | 2.72368    | 2.23618    | 2.10419   | 1.02204    |
| 4 | AB124611       | 0 | -0.0742138 | 0.35062    | 0.0840562  | 1.20153    | 2.2012    | 1.99768    | 2.36247    | 1.66458    | 1.88754   | -0.0290018 |
| 4 | Abca1          | 0 | -0.147625  | 0.420865   | 0.411114   | 0.549472   | 1.08647   | 2.54511    | 2.8797     | 1.58864    | 1.70528   | 0.72038    |
| 4 | Abca4          | 0 | 0.572951   | 1.3075     | 1.52954    | 1.8363     | 1.42104   | 2.62916    | 3.11993    | 2.56322    | 2.75568   | 2.75471    |
| 4 | Abca8a         | 0 | 0.41586    | 0.164503   | -0.189199  | -0.49171   | -0.904537 | 0.173697   | 1.00907    | 1.32332    | 1.74809   | 2.39734    |
| 4 | Abca9          | 0 | -0.57307   | -0.348265  | -0.778392  | -1.31779   | -0.695057 | 1.31916    | 1.99886    | 0.846727   | 0.595066  | -0.0699784 |

|   |          |   |            |            |            |           |           |            |            |           |          |           |
|---|----------|---|------------|------------|------------|-----------|-----------|------------|------------|-----------|----------|-----------|
| 4 | Abcb1b   | 0 | -0.234905  | 0.734069   | 0.804383   | 1.22018   | 1.68927   | 2.94639    | 2.58577    | 1.79882   | 1.81952  | 0.706246  |
| 4 | Abcc4    | 0 | 0.973699   | 2.19943    | 2.71847    | 2.66894   | 1.53938   | 3.44514    | 3.25289    | 1.84834   | 2.37385  | 1.97695   |
| 4 | Abcg1    | 0 | -0.301686  | -0.644844  | -0.176118  | -0.468116 | 0.344561  | 1.66446    | 2.62439    | 0.83614   | 1.1086   | 0.666992  |
| 4 | Ace      | 0 | 0.32372    | 1.11387    | 1.74086    | 1.54098   | 1.39047   | 3.3443     | 2.48795    | 2.49846   | 2.36539  | 2.2997    |
| 4 | Acss3    | 0 | 0.283686   | 1.2881     | 1.01449    | 0.338499  | -1.47186  | 1.81693    | 1.95746    | 1.643     | 1.00231  | 1.37216   |
| 4 | Adam12   | 0 | -0.499917  | -0.132645  | -0.466759  | 0.555289  | 1.12085   | 2.22499    | 2.40914    | 0.324743  | 0.726071 | -0.103285 |
| 4 | Adam17   | 0 | -0.333004  | 0.167578   | 0.323191   | 0.981289  | 1.68383   | 2.40495    | 2.66863    | 1.08006   | 0.866069 | 0.0321793 |
| 4 | Adamts12 | 0 | 1.08718    | 0.294584   | 0.520118   | 1.18968   | 1.42769   | 3.01866    | 3.04432    | 1.49447   | 1.27738  | 0.526445  |
| 4 | Adamts4  | 0 | -0.0097039 | -0.0262853 | 1.76112    | 3.04808   | 0.868522  | 1.90457    | 2.31185    | 1.0626    | 1.23323  | 1.1635    |
| 4 | Adamtsl3 | 0 | -0.805181  | -0.52058   | 0.0034457  | 0.887642  | 0.913166  | 1.70574    | 2.18583    | 1.52462   | 1.85249  | 0.912132  |
| 4 | Adcy7    | 0 | -0.162154  | 0.286529   | 0.673508   | 1.11212   | 1.58116   | 2.61822    | 2.83218    | 1.18881   | 1.57411  | 0.335863  |
| 4 | Adgb     | 0 | 0.570929   | 0.637198   | 0.224553   | 0.414423  | 2.16229   | 1.92927    | 2.42316    | 2.11794   | 2.24979  | 2.52868   |
| 4 | Adgrg6   | 0 | -0.324751  | -0.176277  | 0.375765   | 1.51236   | -0.246335 | 1.80941    | 2.52695    | 0.773645  | 0.07926  | -0.475483 |
| 4 | Adgrv1   | 0 | -0.55588   | 1.45628    | 0.473959   | 1.69937   | 1.80611   | 1.97585    | 2.2582     | 1.549     | 2.46518  | 2.33525   |
| 4 | Aebp1    | 0 | 0.0026131  | 0.169475   | -0.19853   | 0.900733  | 1.7307    | 1.9871     | 2.5554     | 1.63057   | 2.28642  | 1.15764   |
| 4 | AF357355 | 0 | 1.4246     | 2.34375    | 2.35166    | 1.51779   | -1.07318  | 0.772657   | 1.58433    | 0.510237  | 1.14581  | 1.06172   |
| 4 | Afap1l2  | 0 | -0.897758  | -0.146584  | 0.247829   | 1.2493    | 0.524701  | 2.25047    | 2.08709    | 1.20847   | 1.72161  | 0.323326  |
| 4 | Agpat2   | 0 | 0.751914   | 1.4755     | 0.665765   | 2.37784   | 1.70112   | 2.60894    | 3.28308    | 2.36233   | 2.40279  | 1.09439   |
| 4 | Ahnak    | 0 | 0.340348   | 2.40778    | 2.12848    | 2.48527   | 1.55539   | 2.73492    | 3.32763    | 1.85937   | 2.21342  | 1.2836    |
| 4 | AI427809 | 0 | -0.533757  | -0.362351  | -0.378162  | 0.532152  | 1.1048    | 2.04108    | 2.26083    | 1.38031   | 1.59353  | 0.997484  |
| 4 | AI607873 | 0 | 0.831677   | 1.2289     | 1.30409    | 2.02223   | 2.57183   | 2.91029    | 3.04001    | 1.837     | 2.30216  | 0.485852  |
| 4 | Aim1     | 0 | 0.201736   | 1.64273    | 0.963721   | 1.52626   | 2.81146   | 1.87853    | 3.12927    | 1.01112   | 1.96348  | 0.583016  |
| 4 | Ak7      | 0 | 0.658631   | 0.286843   | 0.908385   | 0.815036  | 1.83655   | 2.15062    | 2.04098    | 2.29569   | 3.24441  | 2.00202   |
| 4 | Alas2    | 0 | -0.759028  | -0.894986  | -1.94326   | 0.273905  | -0.234275 | 0.212029   | 1.86052    | 0.424605  | 0.100723 | -1.20191  |
| 4 | Alx4     | 0 | 0.806187   | 1.07502    | 1.52221    | 1.73823   | 3.01673   | 1.93796    | 2.63017    | 1.3863    | 3.47526  | 1.89327   |
| 4 | Ampd3    | 0 | -1.13065   | 0.563135   | 0.583914   | 2.70602   | 0.355939  | 1.64127    | 1.60681    | 0.315278  | 0.343609 | 0.669995  |
| 4 | Angpt1   | 0 | 0.247304   | 0.488864   | 0.640614   | 0.914192  | 0.643717  | 2.21074    | 2.84855    | 2.28975   | 2.45099  | 1.34571   |
| 4 | Angptl2  | 0 | -0.245553  | -0.473808  | -0.0654588 | 0.424373  | 1.80351   | 1.87092    | 2.63578    | 1.04871   | 1.19438  | 0.953835  |
| 4 | Ankrd44  | 0 | -0.761317  | -0.616941  | -0.446026  | -0.197766 | 0.0440225 | 1.84622    | 1.64183    | 0.61676   | 0.727985 | 1.97672   |
| 4 | Ankrd55  | 0 | 0.0002526  | 0.905601   | 0.234512   | 0.725646  | -0.212468 | -0.0150026 | 1.41483    | 1.18116   | 2.69519  | 2.41447   |
| 4 | Ano1     | 0 | -0.160998  | -0.411996  | 0.637749   | 1.79751   | 0.723194  | 2.1526     | 1.9924     | 0.830379  | 2.4734   | 1.57935   |
| 4 | Ano2     | 0 | -1.49096   | -1.2115    | -1.68286   | -1.42592  | -2.6642   | -0.262154  | -0.0021838 | 0.0323045 | 0.161196 | 0.45291   |
| 4 | Anpep    | 0 | -0.250702  | -0.395443  | -0.430665  | 0.14274   | 1.06348   | 1.71283    | 2.25024    | 1.07894   | 2.05719  | 0.172125  |
| 4 | Antxr1   | 0 | 0.0778769  | 0.918941   | 0.907164   | 1.37389   | 1.49502   | 2.53086    | 3.20216    | 2.02112   | 2.34309  | 1.78704   |
| 4 | Antxr2   | 0 | -0.275994  | 0.408806   | 0.118039   | 0.743384  | 1.85407   | 2.08061    | 2.48253    | 1.42669   | 1.97988  | 0.0286692 |
| 4 | Anxa1    | 0 | -0.140405  | 0.441929   | 0.604386   | 0.845809  | 1.69306   | 1.63007    | 2.21414    | 1.43696   | 3.24832  | 1.21141   |
| 4 | Anxa3    | 0 | 0.983215   | 0.798798   | 1.0158     | 1.80122   | 2.7015    | 3.13864    | 3.00217    | 1.95973   | 1.95154  | 1.05633   |
| 4 | Anxa4    | 0 | -0.255917  | 0.0958899  | 0.117913   | 0.569155  | 1.84077   | 2.20181    | 2.5242     | 1.41601   | 1.99161  | 0.851389  |

|   |               |   |           |           |            |           |            |          |          |          |          |           |
|---|---------------|---|-----------|-----------|------------|-----------|------------|----------|----------|----------|----------|-----------|
| 4 | Anxa5         | 0 | 0.357593  | 0.11474   | 0.362902   | 0.704318  | 2.36597    | 2.33121  | 2.57802  | 1.65648  | 2.21137  | 1.20674   |
| 4 | Aoah          | 0 | 0.103937  | -0.814332 | -0.495288  | 0.433269  | 1.16747    | 1.47535  | 2.61795  | 1.29424  | 1.40432  | 0.579135  |
| 4 | Aoc3          | 0 | 0.894052  | 0.502943  | 0.783283   | 0.668618  | 1.41558    | 2.13332  | 2.82477  | 1.87051  | 2.78297  | 0.162863  |
| 4 | Aox3          | 0 | -0.600068 | -0.510917 | 0.403554   | 0.0206909 | 0.785909   | 1.42756  | 2.76602  | 1.13186  | 1.50867  | 1.11154   |
| 4 | Apobr         | 0 | 0.0578739 | 0.770177  | 0.651599   | 1.61922   | 2.53694    | 2.62895  | 2.65017  | 1.28797  | 1.94006  | 0.625379  |
| 4 | Apoc1         | 0 | -0.169345 | -0.808388 | -0.604486  | -0.119965 | 1.03608    | 1.77667  | 2.06448  | 1.45323  | 1.27263  | 0.125114  |
| 4 | Apod          | 0 | 0.368905  | 0.557776  | 0.605305   | 1.46626   | 2.71467    | 2.87832  | 2.4503   | 1.72346  | 1.97261  | 0.963631  |
| 4 | Apoe          | 0 | 0.0208286 | -0.129153 | -0.176577  | -0.302785 | 1.13908    | 2.20128  | 2.4149   | 1.55167  | 1.40882  | 0.482392  |
| 4 | Apoo-ps       | 0 | 1.45499   | 1.09401   | 1.22187    | 1.20387   | -0.220273  | 1.44565  | 1.9654   | 2.23077  | 2.78639  | 2.93652   |
| 4 | Aqp1          | 0 | 1.75716   | 2.29868   | 2.09852    | 1.7632    | 3.34775    | 2.09087  | 3.48992  | 2.23393  | 3.23594  | 3.10633   |
| 4 | Aqp4          | 0 | 0.074262  | 0.470823  | 0.0863443  | 0.392213  | 1.04074    | 2.07883  | 2.98325  | 1.89666  | 1.8991   | 0.902613  |
| 4 | Arhgap18      | 0 | -0.268257 | 0.249189  | 0.961303   | 0.886435  | 2.14476    | 2.66363  | 2.43762  | 1.00871  | 1.93597  | 0.732681  |
| 4 | Arhgap28      | 0 | -0.156867 | 0.720611  | 0.474232   | 2.52275   | 0.221431   | 1.76198  | 1.98028  | 0.799425 | 0.988374 | -0.83862  |
| 4 | Arhgap36      | 0 | 0.617557  | 0.34757   | 1.43213    | 1.88953   | -0.597814  | 1.61119  | 1.30957  | 1.78464  | 2.93034  | 1.66856   |
| 4 | Arhgef5       | 0 | 0.339416  | -0.257876 | 0.465432   | 1.76202   | -0.0726011 | 2.66648  | 2.05755  | 1.43455  | 1.93808  | 1.14416   |
| 4 | Arhgef6       | 0 | -0.113301 | 0.0500398 | -0.160749  | -0.107631 | -0.634725  | 1.74163  | 2.44943  | 1.49128  | 1.38864  | 0.303292  |
| 4 | Arl10         | 0 | -0.224573 | -0.51149  | -1.6453    | 0.452858  | -1.50042   | 0.64062  | 0.858589 | 1.05391  | 0.992018 | 1.19985   |
| 4 | Arl5c         | 0 | -0.639637 | 0.328773  | 1.46814    | 0.756802  | 1.56653    | 1.72489  | 2.87696  | 1.51358  | 0.637348 | 0.0715681 |
| 4 | Armc3         | 0 | 1.64649   | 0.853502  | 0.724314   | 0.477149  | 2.49205    | 2.2691   | 2.40195  | 1.78288  | 2.98156  | 2.63145   |
| 4 | Arsg          | 0 | 0.412485  | 0.610118  | 0.331478   | -0.397629 | 0.837943   | 1.57291  | 2.67452  | 1.93023  | 1.6675   | 2.30959   |
| 4 | Asah1         | 0 | 0.0592199 | 0.141411  | 0.502379   | 0.634459  | 1.07725    | 2.57766  | 3.05005  | 1.30111  | 1.48769  | 0.874833  |
| 4 | Asb4          | 0 | 2.00834   | 1.74129   | 1.01717    | 0.6613    | 1.12567    | 0.281941 | 0.966174 | 1.55251  | 2.66839  | 3.32765   |
| 4 | Ascl1         | 0 | -1.53552  | -0.951792 | -0.43582   | -1.19272  | 0.904197   | 1.4538   | 0.967776 | 0.76215  | 0.83837  | 0.285517  |
| 4 | Atg4a         | 0 | -0.542898 | 0.476468  | 1.59484    | 0.654003  | 1.93565    | 3.14465  | 1.43706  | 1.24508  | 1.60036  | 0.991535  |
| 4 | Atp6v0d2      | 0 | 0.0404197 | -0.523098 | -0.0030794 | 0.0273157 | 0.687572   | 1.15669  | 2.26165  | 1.87728  | 2.28857  | 1.17559   |
| 4 | Atp6v0e       | 0 | 0.412874  | 0.569578  | 1.02539    | 0.977225  | 2.80255    | 2.78678  | 2.62601  | 1.42207  | 1.8674   | 0.731042  |
| 4 | Atp7a         | 0 | 0.551133  | 2.35952   | 2.22245    | 1.98034   | 2.58693    | 3.11177  | 3.21929  | 1.34736  | 2.29707  | 2.37486   |
| 4 | AW551984      | 0 | 0.130305  | 0.3155    | 0.57639    | 0.949428  | 0.178649   | 1.32109  | 1.37136  | 2.13517  | 2.81838  | 2.4946    |
| 4 | Axl           | 0 | -0.135658 | 0.413333  | 0.358482   | 0.409667  | 1.27552    | 2.06777  | 3.11952  | 1.22574  | 0.994843 | 0.0036925 |
| 4 | B2m           | 0 | 0.202482  | 0.349685  | 0.38541    | 0.511392  | 2.3751     | 2.25602  | 2.77448  | 1.71684  | 1.62787  | 0.662043  |
| 4 | B3gnt9        | 0 | 1.07471   | 1.23629   | 0.987838   | 1.23131   | 1.90451    | 2.99332  | 2.93784  | 2.68494  | 2.5371   | 2.75052   |
| 4 | B430306N03Rik | 0 | -0.643077 | -0.407099 | -0.001242  | 0.408658  | 1.64646    | 2.02801  | 2.39675  | 0.518297 | 1.23996  | 0.49761   |
| 4 | Bace2         | 0 | -0.126629 | 0.138965  | -0.270822  | 0.630268  | 1.57031    | 1.32022  | 2.18674  | 1.67222  | 2.68827  | 0.644401  |
| 4 | Baiap3        | 0 | 0.381489  | -0.258848 | -0.269181  | 0.0049384 | 0.700928   | 1.10487  | 1.42161  | 1.54439  | 2.6762   | 2.12722   |
| 4 | BC026585      | 0 | 0.526669  | -0.229218 | 0.677396   | 0.665748  | 2.21339    | 2.38454  | 2.78194  | 1.7591   | 1.66386  | 0.977587  |
| 4 | BC147527      | 0 | 1.47187   | 1.50135   | 1.22841    | 1.13128   | 3.14774    | 2.82279  | 3.31289  | 2.01797  | 2.67169  | 1.96555   |
| 4 | Bche          | 0 | -0.326325 | 0.268071  | -0.0516001 | -0.603818 | -1.1795    | 1.10626  | 1.65085  | 1.23209  | 1.72031  | 1.47811   |
| 4 | Bcl10         | 0 | 0.330438  | 1.68818   | 2.72914    | 2.85955   | 0.914331   | 2.50566  | 2.535    | 1.39159  | 2.52557  | 2.1008    |

|   |         |   |            |            |           |            |           |           |           |            |           |            |
|---|---------|---|------------|------------|-----------|------------|-----------|-----------|-----------|------------|-----------|------------|
| 4 | Bcl2a1a | 0 | -0.711342  | 0.952038   | 0.622225  | 1.82077    | 2.15119   | 2.0305    | 2.12751   | 1.7714     | 1.81298   | 0.207649   |
| 4 | Bcl2a1b | 0 | 0.486751   | 1.04094    | 1.28032   | 1.95482    | 2.80901   | 2.80888   | 2.78725   | 2.13955    | 2.16957   | 0.736249   |
| 4 | Bcl2a1d | 0 | 0.963153   | -0.0580706 | 1.4902    | 2.11706    | 2.61636   | 2.61404   | 2.58669   | 2.0895     | 2.39707   | 1.25862    |
| 4 | Bcl2l11 | 0 | -0.136324  | 0.704491   | 0.848528  | 0.381728   | 1.61758   | 2.63883   | 2.95232   | 0.981753   | 0.732335  | 0.481115   |
| 4 | Bco2    | 0 | -0.0755996 | 0.187061   | -0.460737 | 0.125958   | 1.48878   | 1.82609   | 2.58964   | 1.89542    | 0.544674  | 1.25721    |
| 4 | Bicc1   | 0 | -0.269563  | 0.0979642  | 0.382146  | 0.763322   | 1.87128   | 2.39273   | 2.46992   | 1.3291     | 1.56642   | 0.0739247  |
| 4 | Birc3   | 0 | 1.11649    | 1.9741     | 2.71233   | 2.7953     | 1.43694   | 2.5475    | 3.58092   | 1.53232    | 2.49646   | 1.27673    |
| 4 | Bmf     | 0 | -0.273229  | -0.461889  | -0.623993 | -0.365866  | 1.09743   | 1.90536   | 2.30898   | 1.08805    | 0.541369  | -0.0199087 |
| 4 | Bmp2k   | 0 | -0.20965   | 0.7067     | 0.843248  | 1.71276    | 1.84314   | 2.91017   | 2.8093    | 1.40724    | 1.34515   | 0.952404   |
| 4 | Bmp6    | 0 | 0.553554   | 1.70527    | 0.660722  | 0.365314   | 0.203662  | 2.1084    | 2.41868   | 1.88856    | 2.68176   | 2.28665    |
| 4 | Bnc2    | 0 | -0.641566  | -0.0800102 | -0.483074 | 0.864943   | 1.76787   | 0.820472  | 2.19728   | 1.4297     | 2.01853   | 1.09908    |
| 4 | Brinp3  | 0 | -0.895705  | -2.23372   | -2.80369  | -0.872535  | -1.91887  | -1.03491  | -0.858591 | -0.0315991 | -0.115501 | 0.279004   |
| 4 | Bst2    | 0 | 0.149068   | 0.277513   | 0.182582  | 1.30779    | 2.38502   | 2.48467   | 2.66594   | 1.33584    | 1.77613   | 1.05847    |
| 4 | Btk     | 0 | -0.580529  | 0.0633084  | 0.151844  | 0.929221   | 1.99996   | 2.32261   | 2.31079   | 1.17034    | 1.39753   | 0.450809   |
| 4 | Btla    | 0 | 2.24257    | 1.74381    | 2.05233   | 2.22165    | 0.539524  | 1.92069   | 3.33382   | 1.87205    | 3.38948   | 1.85687    |
| 4 | C1qtnf1 | 0 | -0.917345  | -0.756847  | -0.818534 | 0.424372   | 0.95322   | 1.43566   | 2.21925   | 0.52211    | 0.173673  | 1.12565    |
| 4 | C1qtnf5 | 0 | 0.412751   | 0.229619   | 1.01684   | 0.72786    | 2.85537   | 2.50004   | 2.48503   | 1.3411     | 2.12113   | 1.66115    |
| 4 | C1qtnf7 | 0 | -0.427345  | -0.197194  | 0.0101974 | 1.08381    | 1.84568   | 2.18426   | 1.68316   | 1.63903    | 2.21056   | 1.30831    |
| 4 | C1ra    | 0 | 0.0696805  | 0.208624   | 0.42192   | 1.17445    | 1.63886   | 1.6135    | 2.99347   | 1.8419     | 2.49789   | 1.04154    |
| 4 | C1s1    | 0 | 0.208157   | 0.498723   | 0.239142  | 1.20096    | 1.12406   | 1.74847   | 2.90619   | 2.21176    | 2.60305   | 1.19165    |
| 4 | C2      | 0 | -0.732876  | -0.015272  | -0.318183 | -0.29165   | 0.0649859 | 0.829511  | 2.48981   | 1.19651    | 1.5396    | 1.44376    |
| 4 | C3      | 0 | 0.315684   | 0.331707   | 0.638931  | 1.45091    | 1.69564   | 1.67072   | 2.80084   | 2.63158    | 2.61171   | 1.61183    |
| 4 | C3ar1   | 0 | 0.352059   | 1.18297    | 1.32012   | 1.85667    | 2.67684   | 2.91313   | 2.63545   | 1.64293    | 1.89823   | 0.346061   |
| 4 | C4b     | 0 | 0.119566   | 0.157206   | 0.364867  | 1.43212    | 2.01813   | 2.21939   | 2.64102   | 1.99866    | 2.16175   | 1.91365    |
| 4 | C6      | 0 | -1.05725   | -0.0860641 | -0.156612 | -0.0570145 | -1.05725  | 1.37184   | 1.90393   | 1.15962    | 1.44029   | 0.38554    |
| 4 | Calcr   | 0 | 0.816147   | 0.562828   | 0.558768  | 1.54045    | 1.16421   | 0.162388  | 1.63829   | 1.20791    | 3.26044   | 2.60469    |
| 4 | Calcr1  | 0 | -0.253353  | 0.0033707  | 1.30358   | 2.19144    | 1.18183   | 2.49897   | 2.51823   | 1.50169    | 1.8517    | 1.67861    |
| 4 | Calml4  | 0 | 0.800915   | 1.12643    | 1.3154    | 1.09792    | 2.97255   | 2.80316   | 2.42936   | 1.87876    | 2.98998   | 2.4172     |
| 4 | Capza1  | 0 | 0.107273   | 1.03684    | 1.41836   | 2.33024    | 0.900451  | 2.8112    | 2.75285   | 1.21278    | 1.67281   | 0.27706    |
| 4 | Car13   | 0 | -0.656381  | 0.351448   | 1.20354   | 0.939707   | 1.14842   | 1.805     | 2.72765   | 1.54684    | 2.43458   | 1.21699    |
| 4 | Car14   | 0 | -0.174387  | -0.0433726 | 0.260109  | 0.181686   | -0.538981 | 1.62588   | 2.04967   | 1.62157    | 1.69365   | 2.03128    |
| 4 | Card11  | 0 | -0.273722  | -0.0545449 | 0.0750351 | -0.288618  | 1.95349   | 1.76281   | 2.3749    | 0.693182   | 1.77486   | 0.531024   |
| 4 | Card6   | 0 | -0.467349  | 0.199722   | -0.873216 | -0.933076  | 0.100526  | 1.68514   | 2.12362   | 0.757049   | 1.04722   | 1.03053    |
| 4 | Cartpt  | 0 | 0.299159   | -0.100214  | 0.107917  | 0.0846023  | 0.181883  | -0.122324 | 0.114888  | 1.08677    | 2.09442   | 2.8692     |
| 4 | Casp12  | 0 | -0.0504213 | 0.437639   | 0.336477  | 1.2651     | 2.13378   | 2.38688   | 2.81338   | 1.82279    | 1.81508   | 1.64048    |
| 4 | Casp4   | 0 | 0.200205   | 1.89563    | 1.67091   | 1.82091    | 2.78106   | 2.48914   | 2.94727   | 1.9404     | 2.26769   | 0.660871   |
| 4 | Casq2   | 0 | 0.603636   | -0.453534  | -0.147594 | 0.424172   | 0.290627  | 2.40329   | 0.272035  | 0.193712   | 2.55915   | 1.34412    |
| 4 | Cav1    | 0 | -0.704506  | -0.409011  | 0.641442  | 1.14456    | 1.81437   | 2.18604   | 2.1959    | 1.42343    | 1.44804   | 1.28255    |

|   |         |   |            |            |           |            |           |           |          |          |         |           |
|---|---------|---|------------|------------|-----------|------------|-----------|-----------|----------|----------|---------|-----------|
| 4 | Ccdc108 | 0 | -0.255536  | -0.549917  | 0.138152  | 0.0609011  | 0.00031   | 1.62375   | 1.33994  | 0.692913 | 1.91424 | 2.45804   |
| 4 | Ccdc121 | 0 | 1.01236    | 0.851974   | -0.167354 | 0.370851   | 1.30383   | 1.39791   | 1.75619  | 2.24297  | 2.97792 | 2.34486   |
| 4 | Ccdc146 | 0 | -0.117053  | 0.1395     | -0.848694 | -0.452499  | 1.35422   | 1.52609   | 1.16051  | 0.978304 | 2.34079 | 1.54257   |
| 4 | Ccdc153 | 0 | 0.167414   | 0.212383   | -0.202985 | -0.213159  | 2.12104   | 1.2513    | 1.23166  | 1.60817  | 2.56279 | 1.77662   |
| 4 | Ccdc170 | 0 | 0.466311   | -0.231062  | 0.616789  | 0.812368   | 0.256239  | 1.34938   | 2.86124  | 2.01092  | 2.19706 | 1.72545   |
| 4 | Ccdc180 | 0 | 0.665473   | 0.684144   | -0.59093  | -0.201518  | 0.812188  | 1.44281   | 1.6873   | 1.67564  | 2.64459 | 1.97598   |
| 4 | Ccdc40  | 0 | -0.624119  | 0.696102   | 0.134339  | -0.0714515 | 1.25098   | 1.88395   | 1.94734  | 1.88235  | 2.36205 | 1.11521   |
| 4 | Ccdc60  | 0 | 0.484853   | 1.01432    | 1.20503   | 2.01612    | 2.76729   | 1.86886   | 1.50731  | 2.69017  | 3.00829 | 2.67345   |
| 4 | Ccdc69  | 0 | -1.45877   | 0.475345   | 1.16426   | 0.592838   | 2.03561   | 1.79965   | 1.81317  | 1.33045  | 1.28962 | 0.789891  |
| 4 | Ccdc81  | 0 | 2.62301    | 1.34608    | 2.13869   | 1.4698     | 3.2336    | 2.89883   | 2.46889  | 1.78144  | 3.35568 | 2.95872   |
| 4 | Ccdc96  | 0 | -0.907737  | 0.0587408  | -1.43347  | -0.137809  | 0.373591  | 0.94151   | 0.906174 | 0.79789  | 2.27703 | 0.819458  |
| 4 | Ccl22   | 0 | -0.0612828 | 0.544097   | 0.784918  | 1.39066    | 0.649315  | 0.0923179 | 2.92441  | 1.34765  | 1.05393 | -0.899623 |
| 4 | Ccl28   | 0 | 2.68064    | 2.67372    | 2.4895    | 1.37608    | 0.447423  | 3.01979   | 1.52836  | 1.91147  | 2.40983 | 2.80303   |
| 4 | Ccl5    | 0 | -0.0141852 | -0.345312  | 0.258604  | 1.04021    | 1.92152   | 1.80499   | 2.79297  | 1.65369  | 1.66856 | 0.772225  |
| 4 | Ccl6    | 0 | 0.769345   | 0.774814   | 0.945976  | 2.06616    | 2.5877    | 1.90641   | 3.29659  | 2.29866  | 2.42074 | 1.02037   |
| 4 | Ccl8    | 0 | 0.681524   | 0          | 0         | 0.797782   | 2.26799   | 1.83948   | 2.68064  | 1.93272  | 2.17864 | 1.41112   |
| 4 | Ccr5    | 0 | -0.388234  | 0.262116   | 0.73927   | 1.77586    | 2.3209    | 2.02925   | 2.66052  | 1.43426  | 1.45504 | 0.544952  |
| 4 | Ccr12   | 0 | 1.39185    | -0.175486  | 0.981314  | 0.0568114  | 1.90265   | 1.86873   | 2.77448  | 1.12348  | 1.96236 | 0.0062624 |
| 4 | Cd109   | 0 | 0.502097   | 1.71187    | 1.35677   | 2.37984    | 2.25064   | 3.10913   | 3.25684  | 2.22944  | 2.47367 | 1.78303   |
| 4 | Cd2     | 0 | 1.65173    | 1.13419    | 0         | 1.92158    | 1.89378   | 1.73861   | 2.99384  | 2.29356  | 2.97461 | 2.09802   |
| 4 | Cd200r1 | 0 | 0.0761258  | 1.17959    | 0.507684  | 1.29958    | 1.59816   | 2.2874    | 3.10715  | 1.84398  | 2.43152 | 0.736484  |
| 4 | Cd209a  | 0 | 0.0118134  | -0.0035803 | -1.43842  | 0.0262267  | 0.890027  | -0.307538 | 2.28525  | 1.25152  | 1.09021 | 1.13273   |
| 4 | Cd22    | 0 | 0.651039   | 1.08293    | 0.684721  | 0.574195   | 2.40093   | 2.69759   | 2.8659   | 1.89279  | 2.13747 | 0.645855  |
| 4 | Cd274   | 0 | 0.733207   | 1.13114    | 0.738977  | 1.73852    | 2.09487   | 1.78244   | 3.26964  | 1.23021  | 1.09111 | 3.11275   |
| 4 | Cd28    | 0 | -0.334655  | 0.13861    | 0.381436  | 0.948614   | 1.22274   | 1.63921   | 2.68687  | 0.775022 | 1.46915 | -0.808869 |
| 4 | Cd300lb | 0 | 0.274123   | 0.940136   | 1.81939   | 1.69571    | 2.62248   | 2.60765   | 2.83997  | 2.0205   | 2.47926 | 0.78607   |
| 4 | Cd36    | 0 | 0.153618   | 0.389245   | 0.39536   | 1.27623    | 2.15323   | 2.37857   | 2.13473  | 0.989467 | 2.86323 | 0.774454  |
| 4 | Cd38    | 0 | 0.947968   | 0.949697   | 0.871965  | 1.4827     | 1.84485   | 2.43749   | 3.34037  | 1.32913  | 1.68431 | -0.102093 |
| 4 | Cd3g    | 0 | -0.697192  | -0.715147  | -1.03547  | -0.105033  | 0.0942488 | 0.125864  | 1.94748  | 1.38801  | 1.62183 | 0.769573  |
| 4 | Cd48    | 0 | -0.118605  | 0.27458    | -0.112363 | 0.634426   | 2.10731   | 2.17739   | 2.45371  | 1.62505  | 1.85669 | 0.789663  |
| 4 | Cd52    | 0 | 0.114029   | 0.171139   | 0.295361  | 1.26178    | 2.41525   | 2.2096    | 2.59775  | 1.732    | 1.82415 | 0.585596  |
| 4 | Cd53    | 0 | 0.002506   | 0.369978   | 0.647174  | 1.27025    | 2.2512    | 2.45903   | 2.69618  | 1.52965  | 1.79966 | 0.344345  |
| 4 | Cd5l    | 0 | -0.586114  | -0.0014745 | 0.202828  | 0.861531   | 1.92267   | 2.02322   | 1.97888  | 1.75169  | 2.02504 | 0.390683  |
| 4 | Cd74    | 0 | 0.275182   | 0.0512863  | 0.13176   | 0.872316   | 2.38141   | 1.10106   | 2.55968  | 2.02758  | 2.25271 | 0.831385  |
| 4 | Cd82    | 0 | 0.620634   | 0.911907   | 0.912947  | 1.57555    | 2.52266   | 2.76757   | 3.11103  | 2.22278  | 2.3121  | 2.2027    |
| 4 | Cd83    | 0 | 1.3496     | 1.67278    | 1.82082   | 1.14057    | 1.15634   | 1.7823    | 3.75849  | 2.37847  | 3.01835 | 1.60607   |
| 4 | Cd84    | 0 | -0.0288769 | 0.216562   | 0.244522  | 0.825689   | 2.16088   | 2.46852   | 2.45525  | 1.57904  | 1.71051 | 0.399087  |
| 4 | Cd86    | 0 | 1.12189    | 1.70957    | 1.72006   | 1.88025    | 2.51515   | 2.88768   | 3.55959  | 2.01128  | 1.56699 | 0.619534  |

|   |          |   |            |           |            |           |            |          |            |            |            |           |
|---|----------|---|------------|-----------|------------|-----------|------------|----------|------------|------------|------------|-----------|
| 4 | Cdc42bpg | 0 | 0.181799   | 0.656551  | 1.34449    | 1.94183   | 2.80642    | 2.8374   | 2.39775    | 0.92536    | 1.68546    | 2.15788   |
| 4 | Cdh1     | 0 | -0.460351  | 2.47761   | 1.668      | 1.53615   | 1.67354    | 2.40232  | 2.2816     | 1.92111    | 2.69033    | 1.74338   |
| 4 | Cdhr3    | 0 | -0.0797538 | 0.602849  | 0.0359542  | 0.774213  | 0.912918   | 1.9966   | 2.3727     | 1.80702    | 2.68335    | 1.8128    |
| 4 | Cdk5rap2 | 0 | 0.792493   | 1.58325   | 1.38421    | 1.57392   | 3.28253    | 2.85896  | 2.93735    | 2.55975    | 2.50116    | 2.04918   |
| 4 | Cemip    | 0 | -1.04831   | -0.434737 | -0.775923  | -0.520525 | -1.71329   | 0.448327 | 2.15768    | -0.0945767 | -0.0976518 | -0.919889 |
| 4 | Cenpj    | 0 | -0.324277  | -0.835001 | 0.245729   | 0.813257  | 1.70869    | 2.40501  | 1.95475    | 0.815102   | 1.357      | 0.533258  |
| 4 | Cep192   | 0 | -1.05969   | 0.0673015 | 0.0227413  | 0.346551  | 1.07805    | 2.55657  | 1.88386    | 0.536756   | 0.618788   | -0.13287  |
| 4 | Cfap43   | 0 | -0.502151  | 0.0666511 | -0.893435  | -0.173145 | 0.6686     | 1.65274  | 1.49581    | 0.973559   | 1.92184    | 1.83637   |
| 4 | Cfap44   | 0 | -0.644225  | 0.321166  | 0.605033   | 0.026708  | 0.420492   | 2.1849   | 2.05714    | 1.49398    | 2.1854     | 1.53494   |
| 4 | Cfap53   | 0 | 2.40994    | 1.57634   | 3.21983    | 3.3561    | 2.33117    | 2.98365  | 2.78935    | 3.13194    | 3.40699    | 2.80541   |
| 4 | Cfap57   | 0 | 0.179193   | 0.639003  | -0.619891  | -1.15742  | 0.381193   | 0.142739 | 0.507456   | 1.34635    | 1.42466    | 2.47897   |
| 4 | Cfap70   | 0 | 0.791432   | 1.7553    | 1.40735    | 1.7171    | 1.69247    | 2.65408  | 2.00127    | 2.74187    | 3.56556    | 2.7734    |
| 4 | Cfb      | 0 | 0.10096    | 0.370784  | 0.708364   | 1.11707   | 2.46741    | 1.93684  | 2.95826    | 1.7377     | 1.99147    | 0.633334  |
| 4 | Cfh      | 0 | -0.0377658 | 0.510796  | 0.353915   | 0.894257  | 1.33831    | 2.40899  | 3.01927    | 1.62102    | 1.9326     | 0.691105  |
| 4 | Cgn      | 0 | 0.980098   | 0.261862  | 0.925205   | 1.10011   | 1.3744     | 2.15009  | 2.25272    | 2.41942    | 2.78596    | 2.91144   |
| 4 | Cgnl1    | 0 | 0.494124   | 1.26147   | 1.33752    | 2.05249   | 2.33973    | 3.2638   | 2.98826    | 2.11074    | 2.50452    | 2.0934    |
| 4 | Chdh     | 0 | -0.763029  | -0.485822 | 1.28626    | 0.22024   | -0.0324556 | 1.44746  | 1.51247    | 1.2539     | 2.14582    | 1.83307   |
| 4 | Chp2     | 0 | 2.09873    | 2.31558   | 2.37137    | 2.01437   | 3.11656    | 3.78445  | 3.42668    | 2.36467    | 2.78855    | 1.7953    |
| 4 | Clcn5    | 0 | -0.442801  | 0.713976  | 0.501715   | 0.620428  | -1.86276   | 0.989504 | 1.63592    | 0.865168   | 1.54048    | 1.19151   |
| 4 | Cldn2    | 0 | 1.2155     | 2.12055   | 2.53007    | 2.73031   | 1.77412    | 3.13378  | 2.41979    | 3.08389    | 2.39098    | 3.58977   |
| 4 | Clec12a  | 0 | -0.0691145 | -0.635473 | 0.25131    | 0.150405  | 1.34894    | 1.89047  | 2.20831    | 1.39208    | 2.21576    | 0.643218  |
| 4 | Clec2d   | 0 | -0.598106  | 0.807497  | 1.1619     | 0.916993  | 2.56025    | 1.83698  | 2.33077    | 0.456326   | 1.69146    | 0.159856  |
| 4 | Clec3b   | 0 | -0.171641  | -0.40075  | -0.696185  | -0.802835 | 0.622556   | 1.0483   | 2.29994    | 1.29967    | 1.39908    | -0.180045 |
| 4 | Clec4a1  | 0 | 0.809971   | 2.11901   | 2.07853    | 2.38562   | 2.87106    | 2.33453  | 3.42072    | 1.97921    | 2.91096    | 1.16578   |
| 4 | Clec4a3  | 0 | -0.549091  | -0.375854 | -0.0853013 | 0.0306218 | 1.58182    | 1.36479  | 2.36716    | 1.34851    | 1.64053    | 0.0414972 |
| 4 | Clec4e   | 0 | -0.0819577 | 0.691956  | 0.224176   | 1.57358   | 1.58314    | 0.907692 | 2.07915    | 1.49603    | 1.76766    | -1.19103  |
| 4 | Clec5a   | 0 | -0.366369  | -0.207128 | 0.519232   | 1.37394   | 1.9395     | 2.13234  | 2.59485    | 1.50108    | 1.41304    | 0.559476  |
| 4 | Clec7a   | 0 | 0.105529   | 0.39273   | 0.496312   | 1.01373   | 1.74799    | 2.31851  | 2.74234    | 2.23648    | 2.2737     | 0.864314  |
| 4 | Clic6    | 0 | 0.430768   | 0.550193  | 1.20334    | 1.40709   | 0.738187   | 2.54054  | 2.33381    | 2.07871    | 2.92564    | 2.44038   |
| 4 | Clk1     | 0 | -0.565834  | 0.404101  | 1.41473    | 0.342434  | -0.133597  | 1.94086  | 1.20209    | 1.78932    | 2.26229    | 2.0805    |
| 4 | Cln5     | 0 | 0.0861507  | 0.823477  | 1.29508    | 1.32505   | 2.63258    | 2.98531  | 2.73153    | 1.44224    | 1.70084    | 1.06778   |
| 4 | Cmtm6    | 0 | 0.0296433  | 0.257928  | 0.584092   | 1.25735   | 1.96386    | 2.29403  | 3.16664    | 1.22461    | 1.56556    | 0.828679  |
| 4 | Cnn1     | 0 | 2.56375    | 3.22184   | 1.8245     | 1.12234   | 1.85566    | 2.54229  | 2.68305    | 2.12134    | 3.49778    | 2.92381   |
| 4 | Cntf     | 0 | 0.664633   | 0.8067    | 1.15515    | 1.25269   | -0.99893   | 1.94893  | 2.29464    | 1.90049    | 2.14727    | 1.58632   |
| 4 | Cntrl    | 0 | 0.0625095  | 0.19651   | 0.457016   | 0.55069   | 2.24703    | 2.65089  | 2.46641    | 1.1608     | 1.63311    | 0.54522   |
| 4 | Col10a1  | 0 | 0.21823    | 0.64523   | 0.939484   | 0.170323  | -1.92081   | 2.12515  | -0.0849534 | -0.203138  | -0.706475  | 0.0080657 |
| 4 | Col12a1  | 0 | -1.49334   | 0.353019  | -0.381806  | 0.320391  | -1.29854   | 1.28048  | 1.82348    | 0.122445   | 0.31604    | -0.797836 |
| 4 | Col13a1  | 0 | -0.387292  | -1.04209  | -0.778181  | -0.153029 | 0.806348   | 1.49206  | 1.98172    | 1.35471    | 1.15935    | 0.803259  |

|   |           |   |            |            |            |            |           |           |         |          |          |            |
|---|-----------|---|------------|------------|------------|------------|-----------|-----------|---------|----------|----------|------------|
| 4 | Col14a1   | 0 | 0.392161   | 1.23902    | 0.0757162  | 1.09829    | 0.603986  | 2.06711   | 2.9885  | 2.32343  | 1.68036  | 2.21653    |
| 4 | Col15a1   | 0 | 0.0382596  | -0.0746681 | -0.100253  | -0.392341  | 1.61465   | 1.8947    | 2.57797 | 1.4404   | 1.28476  | 0.461557   |
| 4 | Col18a1   | 0 | 0.0640337  | 0.294046   | 0.298717   | 1.03978    | 1.74952   | 3.02875   | 2.47014 | 0.951157 | 1.09744  | 0.452695   |
| 4 | Col1a1    | 0 | -0.144509  | 0.03561    | -0.102508  | 0.52988    | 1.43609   | 2.65276   | 2.41681 | 1.11998  | 1.3858   | 0.381945   |
| 4 | Col1a2    | 0 | -0.27414   | -0.244254  | -0.28221   | 0.29461    | 1.46288   | 2.34814   | 2.36649 | 0.996848 | 1.28368  | 0.42196    |
| 4 | Col3a1    | 0 | -0.281659  | 0.299412   | 0.233233   | 0.560661   | 1.77866   | 2.5981    | 2.58981 | 1.1518   | 1.28052  | 0.446066   |
| 4 | Col4a5    | 0 | 0.0944463  | 0.232558   | -0.171366  | 0.39499    | 0.869165  | 2.4708    | 2.86007 | 1.24738  | 1.37248  | 1.17694    |
| 4 | Col4a6    | 0 | -0.167961  | -0.322914  | -0.210608  | 0.0083545  | 0.976129  | 2.05568   | 2.65154 | 1.29191  | 1.28308  | 0.601991   |
| 4 | Col6a2    | 0 | -0.816828  | -1.01655   | -0.610676  | -0.0138959 | -0.480996 | 1.64514   | 1.95127 | 0.410495 | 1.23898  | 0.127811   |
| 4 | Col6a3    | 0 | 0.139835   | 0.698829   | 1.02742    | 0.923109   | 2.01993   | 3.09045   | 2.87945 | 1.6751   | 1.69972  | 1.43185    |
| 4 | Col6a5    | 0 | -0.823139  | -0.330521  | 0.253587   | -0.170854  | 1.30252   | 1.39215   | 1.31994 | 1.28971  | 1.33074  | 2.49161    |
| 4 | Col8a2    | 0 | 0.236576   | -0.219153  | -0.0742099 | 1.12443    | 0.983334  | 2.01071   | 1.86755 | 1.45767  | 2.62684  | 2.11673    |
| 4 | Col9a3    | 0 | 0.143474   | -0.278608  | -0.185043  | 0.493415   | 1.8702    | 2.60022   | 2.01209 | 1.1667   | 1.74763  | 1.21395    |
| 4 | Colec12   | 0 | 0.27735    | 0.366723   | 0.19924    | -0.247787  | 0.668694  | 2.34049   | 2.67221 | 0.95338  | 1.72418  | -0.0178394 |
| 4 | Cox6b2    | 0 | 0.196065   | -0.347589  | 0.771046   | -0.249554  | 2.06236   | 2.47166   | 1.38192 | 1.56271  | 1.98764  | 1.44586    |
| 4 | Cp        | 0 | 0.44281    | 1.15372    | 1.27323    | 2.07082    | 2.11227   | 2.41346   | 3.37256 | 2.22274  | 2.5241   | 1.00454    |
| 4 | Cped1     | 0 | -0.221569  | 0.0636634  | -0.0493906 | 0.641889   | 0.824183  | 2.3797    | 2.52779 | 1.33724  | 1.78923  | 1.62998    |
| 4 | Cpne3     | 0 | -0.156754  | 1.13637    | 0.589675   | 1.74486    | 1.95358   | 2.43182   | 2.96912 | 1.01852  | 1.52779  | 0.361403   |
| 4 | Cpq       | 0 | 0.151861   | 0.562256   | 0.523768   | 0.0286794  | 1.35211   | 2.22095   | 2.76965 | 1.56657  | 2.44953  | 1.28862    |
| 4 | Cpt1a     | 0 | -0.240411  | 0.641483   | 0.87051    | 0.877332   | 1.67124   | 2.96592   | 2.69115 | 1.0333   | 0.920893 | 0.5469     |
| 4 | Cpt2      | 0 | -0.461063  | 0.709075   | 0.820931   | 1.43484    | 2.35959   | 2.33285   | 2.37363 | 1.70754  | 1.33446  | 0.152534   |
| 4 | Cpxm1     | 0 | 0.619293   | 0.249517   | 0.118474   | 0.161913   | 1.11896   | 2.26874   | 2.97169 | 1.34606  | 1.96093  | 0.48429    |
| 4 | Cpxm2     | 0 | 0.327842   | 0.669859   | 0.993884   | 1.4805     | 1.61678   | 1.68758   | 3.11199 | 2.34894  | 2.93712  | 1.52737    |
| 4 | Cr1l      | 0 | 0.175645   | 0.917567   | 1.23482    | 1.83596    | 2.40192   | 2.8043    | 2.94711 | 1.39919  | 1.48761  | 0.548501   |
| 4 | Crabp2    | 0 | -0.424283  | 0.351914   | 0.523452   | 0.0947132  | 1.2909    | 1.88241   | 2.07083 | 1.57189  | 2.68161  | 1.61602    |
| 4 | Creb3l1   | 0 | 0.628426   | 0.851904   | 1.48265    | 1.50271    | 2.75488   | 3.38124   | 1.90152 | 0.894572 | 2.47354  | 1.83671    |
| 4 | Creb5     | 0 | -0.0182017 | 2.63007    | 1.66692    | -0.304432  | -0.111503 | -0.135489 | 1.86994 | 1.01165  | 1.08422  | 0.103385   |
| 4 | Creg1     | 0 | 0.2014     | 0.212247   | 0.50214    | 0.375863   | 2.08605   | 2.58677   | 2.6561  | 1.2563   | 1.29486  | 0.272313   |
| 4 | Crocc2    | 0 | -0.48584   | -0.422311  | -0.921944  | 0.631238   | 0.990409  | 1.72547   | 1.04401 | 1.19084  | 2.08191  | 1.6002     |
| 4 | Csf1      | 0 | -0.115918  | 0.92131    | 1.98956    | 2.17134    | 2.44877   | 2.51089   | 2.96131 | 1.46196  | 1.48952  | 1.21325    |
| 4 | Cst7      | 0 | 1.3802     | 1.20978    | 1.2466     | 1.87671    | 2.78016   | 2.93185   | 3.33157 | 2.92726  | 2.51031  | 1.80432    |
| 4 | Ctsk      | 0 | 0.439347   | 0.157121   | -0.368126  | 0.632528   | -0.217418 | 1.88241   | 2.13395 | 0.586196 | 2.63212  | 0.586093   |
| 4 | Ctss      | 0 | 0.122975   | 0.239648   | 0.302648   | 0.469298   | 2.00013   | 2.32906   | 2.76152 | 1.7239   | 1.78974  | 0.741686   |
| 4 | Cttnbp2nl | 0 | 0.906538   | 1.49382    | 1.87058    | 1.69396    | 2.12307   | 3.3283    | 3.49913 | 1.3251   | 1.38033  | 1.37339    |
| 4 | Cxcl10    | 0 | 0.574913   | 0.996909   | 1.84734    | 2.68672    | 2.67626   | 2.61001   | 3.18152 | 1.74888  | 1.8991   | 1.09128    |
| 4 | Cxcl13    | 0 | 0.731983   | 0          | 0.970807   | 1.21047    | 1.53722   | 1.58727   | 2.66307 | 2.58721  | 2.93615  | 1.43695    |
| 4 | Cxcl16    | 0 | 0.330095   | 0.666063   | 1.07225    | 1.60154    | 2.78846   | 2.59885   | 2.82197 | 1.83439  | 2.26427  | 1.04569    |
| 4 | Cxcl5     | 0 | 0.715512   | 0.968488   | 0.892687   | 1.83806    | 2.60396   | 1.81223   | 2.84222 | 2.82897  | 2.8695   | 2.17208    |

|   |          |   |            |            |            |            |           |           |           |           |           |            |
|---|----------|---|------------|------------|------------|------------|-----------|-----------|-----------|-----------|-----------|------------|
| 4 | Cxcl9    | 0 | -0.343276  | 0.883578   | 0.579458   | 0.406864   | 1.44713   | 2.02325   | 3.03707   | 1.78974   | 1.82053   | 0.661226   |
| 4 | Cxcr4    | 0 | 0.370176   | 0.453463   | 1.08642    | 0.407198   | 2.48345   | 2.54565   | 2.74184   | 1.6505    | 2.07531   | 0.915531   |
| 4 | Cybb     | 0 | 0.0417957  | 0.0361892  | 0.0441537  | 1.24255    | 2.09172   | 2.04952   | 2.48101   | 1.62916   | 2.18032   | 0.679446   |
| 4 | Cybrd1   | 0 | 0.442293   | 0.821659   | 0.979776   | 1.01167    | 1.9051    | 3.01132   | 2.86047   | 1.47112   | 1.49492   | 0.131513   |
| 4 | Cyfip1   | 0 | -0.402204  | 0.0725361  | 0.0523674  | 0.480989   | 1.36081   | 2.45693   | 2.58506   | 1.05611   | 0.656682  | 0.166564   |
| 4 | Cyp1b1   | 0 | 0.794358   | 1.92938    | 2.40826    | 2.39905    | 1.65598   | 2.92617   | 3.35821   | 2.12898   | 2.64595   | 0.993373   |
| 4 | Cyp4v3   | 0 | 0.0411083  | 0.632643   | 0.611566   | 1.06128    | 1.44095   | 2.34678   | 3.20648   | 1.76195   | 2.19087   | 1.34377    |
| 4 | Cyth4    | 0 | -0.563022  | -0.0805543 | 0.326567   | 0.695173   | 2.05391   | 2.20965   | 2.26831   | 1.15359   | 1.18697   | 0.0743201  |
| 4 | Cytip    | 0 | 1.12534    | 0.154534   | 0.70122    | 1.48927    | 2.38612   | 1.08501   | 3.22034   | 1.47365   | 2.35148   | 0.572126   |
| 4 | Dapp1    | 0 | -0.255268  | 0.389386   | 0.200057   | 0.0882372  | 1.62712   | 2.6333    | 2.49113   | 1.47728   | 1.18481   | 1.18414    |
| 4 | Ddr1     | 0 | 0.150516   | -0.132294  | -0.0625451 | 0.885439   | 1.88304   | 2.31699   | 2.65729   | 1.47125   | 1.66241   | 1.03975    |
| 4 | Ddr2     | 0 | 0.217148   | 1.21847    | 0.845874   | 1.99175    | 2.06102   | 2.69105   | 3.15664   | 1.7097    | 2.50636   | 1.50615    |
| 4 | Ddx58    | 0 | -0.161592  | 0.316139   | 0.535943   | 1.3582     | 1.80197   | 2.5628    | 2.88943   | 1.12143   | 1.33871   | 0.542398   |
| 4 | Ddx60    | 0 | -0.0028566 | -0.59693   | -0.203675  | 0.702654   | 1.52761   | 2.16361   | 2.50738   | 0.944821  | 1.24067   | 0.318789   |
| 4 | Dgkk     | 0 | 1.06774    | 0.77933    | 0.960295   | 1.7385     | 1.28794   | 0.679813  | 2.14539   | 1.34805   | 3.55764   | 2.64546    |
| 4 | Dhrs3    | 0 | -0.0287033 | -0.0862125 | -0.509356  | -0.648606  | 1.48818   | 1.92636   | 1.91      | 0.915894  | 1.13518   | 1.822      |
| 4 | Dlk1     | 0 | 1.41181    | 0.76826    | 0.910889   | 1.11196    | 0.67058   | 1.13358   | 1.53963   | 1.62965   | 3.09881   | 3.33947    |
| 4 | Dnaaf3   | 0 | 0.0911638  | -1.24018   | 0.427518   | 1.07293    | 1.36558   | 1.3214    | 2.25496   | 1.35094   | 1.82897   | 0.156845   |
| 4 | Dnah10   | 0 | -0.111566  | 0.461627   | 0.115506   | 0.633327   | 0.179394  | 2.2465    | 1.939     | 1.80267   | 2.40204   | 1.93375    |
| 4 | Dnah11   | 0 | -0.570454  | -0.773556  | -0.420928  | 0.474498   | 1.68044   | 1.47045   | 1.47483   | 0.455185  | 1.92726   | 1.5446     |
| 4 | Dnah2    | 0 | 0.439042   | 0.199578   | 0.822499   | 0.465182   | 0.641847  | 2.17709   | 2.40402   | 2.38705   | 2.46512   | 1.99344    |
| 4 | Dnah5    | 0 | -0.56718   | 0.261043   | -0.0584105 | -1.32203   | -0.791645 | 0.556942  | 1.26829   | 1.27017   | 1.76823   | 1.35963    |
| 4 | Dnah6    | 0 | 0.0997317  | 0.382977   | 0.0255427  | 0.555635   | -0.59153  | 1.49914   | 1.63793   | 2.12118   | 2.18154   | 1.96642    |
| 4 | Dnah7b   | 0 | 1.58034    | 1.82171    | 1.04586    | 1.52782    | 1.76374   | 2.59346   | 3.04729   | 2.26303   | 3.76423   | 2.03063    |
| 4 | Dnah9    | 0 | 0.165261   | 0.573233   | 0.0615258  | -0.0827078 | -0.490294 | 1.78785   | 1.76508   | 1.98956   | 2.31542   | 1.38128    |
| 4 | Dnaic2   | 0 | 1.16829    | 1.62095    | 1.47603    | 1.35399    | 2.63991   | 3.27963   | 2.77803   | 2.57507   | 2.44596   | 3.14547    |
| 4 | Dnali1   | 0 | 0.298874   | -0.0958899 | -0.131675  | 0.165693   | 1.66559   | 1.46842   | 1.94198   | 1.78079   | 2.52901   | 1.9279     |
| 4 | Dnase1l1 | 0 | -0.808886  | -0.209738  | 0.0619941  | 0.328707   | 2.10784   | 1.90827   | 2.00829   | 0.716639  | 1.50063   | 0.423875   |
| 4 | Dock11   | 0 | -0.243346  | 0.403229   | 0.120234   | 0.203281   | 0.609104  | 2.07678   | 2.60416   | 1.70931   | 2.14302   | 0.86847    |
| 4 | Dock5    | 0 | 0.182107   | 0.699585   | 0.62693    | 0.311508   | -1.10286  | 1.24726   | 2.10548   | 1.64519   | 2.05236   | 1.77009    |
| 4 | Dok1     | 0 | -0.344313  | 0.405196   | 0.584025   | 0.906266   | 2.33762   | 2.36664   | 2.47657   | 1.80564   | 1.82251   | 0.998061   |
| 4 | Dpyd     | 0 | 0.580437   | 0.971638   | -0.119047  | 0.445383   | -0.604227 | 1.08445   | 2.34013   | 1.85519   | 2.00709   | 2.07387    |
| 4 | Dram1    | 0 | -0.785864  | 0.660297   | 0.806685   | 0.303834   | 1.4505    | 2.01908   | 2.52102   | 1.0353    | 2.25041   | 1.28378    |
| 4 | Draxin   | 0 | 1.30227    | 1.28253    | 1.14016    | 0.457775   | 0.698796  | 2.29474   | 3.54462   | 1.61299   | 2.36205   | 0.948106   |
| 4 | Drc7     | 0 | 0.771229   | 1.15999    | 1.17536    | 1.43313    | 1.69471   | 2.6668    | 2.4332    | 2.50026   | 3.25299   | 2.80152    |
| 4 | Drd1     | 0 | -1.06001   | -1.42967   | -1.58162   | -1.82986   | -3.46356  | -0.677976 | -0.512139 | -0.337132 | -0.648554 | -0.0801714 |
| 4 | Dse      | 0 | -0.375915  | 1.37471    | 1.46718    | 1.14689    | 1.15312   | 2.35636   | 3.10416   | 1.41134   | 1.92586   | 0.491786   |
| 4 | Dsp      | 0 | -1.15531   | -0.621545  | 0.174658   | -1.90957   | -2.32915  | -0.953985 | 0.422766  | 0.451823  | 0.743793  | -0.410238  |



|   |          |   |            |            |            |            |            |            |           |           |          |            |
|---|----------|---|------------|------------|------------|------------|------------|------------|-----------|-----------|----------|------------|
| 4 | Dtx3l    | 0 | -0.352481  | 0.163413   | 0.504149   | 0.864416   | 2.02998    | 2.27338    | 2.8095    | 0.784327  | 1.26656  | 0.635975   |
| 4 | Ebf3     | 0 | 2.05752    | 1.33959    | 1.36561    | 1.89753    | 1.65124    | 2.04869    | 2.67067   | 2.62688   | 3.91327  | 2.72684    |
| 4 | Ecel1    | 0 | -0.161112  | -0.591573  | -0.431309  | 0.650279   | 0.70796    | 1.54923    | 1.87804   | 1.36358   | 1.95099  | 2.06083    |
| 4 | Edn3     | 0 | -0.845676  | -0.969984  | -1.50234   | -1.04614   | -0.0792583 | 0.958405   | 1.60505   | 0.963754  | 0.387262 | 0.643385   |
| 4 | Ednra    | 0 | 0.307546   | 1.31624    | 1.21953    | 1.26364    | 2.76888    | 3.03988    | 2.45663   | 1.33022   | 1.69369  | 0.384661   |
| 4 | Efemp1   | 0 | -0.110652  | 0.733042   | 0.246924   | 0.331785   | 1.33805    | 1.70301    | 2.60645   | 1.78596   | 2.70673  | 1.5288     |
| 4 | Egflam   | 0 | 0.0232772  | -0.258441  | -0.240821  | 0.0185234  | 1.97257    | 1.79208    | 1.87044   | 0.729828  | 1.69802  | 2.10433    |
| 4 | Elf1     | 0 | 0.59766    | 1.33166    | 1.40744    | 1.92325    | 2.93545    | 3.06805    | 3.08248   | 1.16037   | 1.77475  | 1.55989    |
| 4 | Elf4     | 0 | 0.274555   | 0.991525   | 1.31352    | 2.11188    | 2.46614    | 2.9731     | 3.06759   | 1.73915   | 1.9022   | 1.29259    |
| 4 | Eno4     | 0 | 0.203191   | 0.388046   | 0.189818   | 0.734177   | 0.0202105  | 1.76521    | 1.8633    | 2.39895   | 2.43251  | 2.02908    |
| 4 | Enpp1    | 0 | 0.0919487  | 0.412221   | 0.269839   | 0.679597   | 2.41201    | 2.64502    | 2.56071   | 1.25097   | 1.58094  | 1.04117    |
| 4 | Enpp2    | 0 | 0.84297    | 1.21778    | 1.38283    | 1.24097    | 0.948242   | 2.59213    | 2.57351   | 2.60675   | 2.91609  | 2.8962     |
| 4 | Epb4.112 | 0 | -0.103765  | 0.187961   | 0.0484492  | -0.208139  | 0.650356   | 2.59597    | 2.51643   | 0.907705  | 0.298542 | 0.162051   |
| 4 | Eps8l1   | 0 | 0.219723   | 1.0965     | 0.696543   | 1.03003    | 2.05632    | 2.47027    | 3.296     | 2.20311   | 1.13153  | 1.62707    |
| 4 | Epsti1   | 0 | -0.121641  | -0.0985163 | -0.0404453 | 0.288896   | 2.02551    | 2.04758    | 2.57044   | 1.32106   | 1.43624  | 0.663827   |
| 4 | Erap1    | 0 | -0.110446  | 0.381883   | 0.404474   | 1.44364    | 1.49107    | 2.4839     | 2.99685   | 1.71687   | 1.72152  | 1.15732    |
| 4 | Erbp2ip  | 0 | 0.124293   | 0.860303   | 1.37059    | 2.2174     | 0.463203   | 2.37028    | 2.8886    | 2.10709   | 2.17417  | 2.07911    |
| 4 | Esyt3    | 0 | -0.133848  | -0.50454   | 0.807762   | -0.0943583 | -2.20234   | -0.0239395 | 0.329326  | 0.772906  | 0.921852 | 1.69823    |
| 4 | Evi2a    | 0 | 0.309392   | 0.134702   | 0.553017   | 0.0485165  | 1.35995    | 2.33624    | 2.90764   | 1.69059   | 1.75341  | 1.56654    |
| 4 | Evi2b    | 0 | -0.262979  | -0.224424  | 0.371577   | 1.29648    | 1.79629    | 2.30636    | 2.09089   | 0.902002  | 1.29344  | -0.455994  |
| 4 | Exph5    | 0 | -1.43412   | -0.848649  | -0.993428  | -1.28832   | -3.94092   | -1.63775   | -0.966905 | -0.685479 | -1.4444  | -0.659032  |
| 4 | Eya2     | 0 | 1.38566    | 0.999024   | 1.15384    | 1.15637    | 1.00725    | 2.89534    | 2.96752   | 1.31662   | 2.98132  | 2.4953     |
| 4 | Eya4     | 0 | -0.227543  | 0.382164   | 0.51092    | -0.247389  | 0.458118   | 2.31677    | 2.82532   | 1.42271   | 0.940946 | 1.03868    |
| 4 | F5       | 0 | 0.991951   | 1.56966    | 1.67018    | 1.96767    | 1.65511    | 3.18071    | 2.83978   | 2.85876   | 2.95454  | 2.92532    |
| 4 | Fabp4    | 0 | -0.19256   | 0.217772   | 0.876168   | 0.395037   | 1.78509    | 1.59272    | 2.56596   | 1.89566   | 2.48677  | 0.486373   |
| 4 | Fam114a1 | 0 | 0.372036   | 0.775364   | 0.227779   | 1.04118    | 2.39529    | 2.93534    | 2.56344   | 1.66611   | 1.56538  | 0.768735   |
| 4 | Fam129a  | 0 | 0.929743   | 1.19016    | 0.964144   | 1.7875     | 2.02343    | 2.43727    | 3.76976   | 1.99746   | 2.55306  | 1.71941    |
| 4 | Fam167a  | 0 | 0.69921    | 2.30966    | 1.36179    | 2.16009    | 2.03112    | 2.71461    | 3.37371   | 2.42574   | 3.06002  | 2.30528    |
| 4 | Fam179a  | 0 | 2.43159    | 0.454153   | 2.12536    | 3.26519    | 1.57978    | 2.29403    | 3.16886   | 1.97576   | 1.6176   | 2.29727    |
| 4 | Fam180a  | 0 | -0.779134  | -0.860927  | -1.06176   | -0.371879  | 0.815356   | 0.809121   | 1.84838   | 1.08224   | 1.40321  | 0.901791   |
| 4 | Fam198b  | 0 | -1.57411   | -2.19966   | -3.13515   | -1.93078   | -3.43559   | -0.878695  | -0.757382 | -2.15474  | -1.81638 | -1.66509   |
| 4 | Fam26f   | 0 | 0.112954   | 0.70004    | -0.579272  | 0.578694   | 1.33874    | 1.77321    | 2.78195   | 1.64746   | 2.05538  | 0.812706   |
| 4 | Fam46a   | 0 | 1.51143    | 2.20883    | 1.78858    | 1.20009    | 3.23857    | 2.8262     | 3.4464    | 1.40731   | 2.45322  | 1.57776    |
| 4 | Fam84b   | 0 | -0.819757  | -0.0303384 | 0.508628   | 0.0403937  | -0.76236   | 1.7605     | 1.45948   | 1.02711   | 2.04893  | 1.42612    |
| 4 | Fat4     | 0 | -1.81988   | 0.780961   | 0.776023   | -0.638566  | -1.85022   | 0.276431   | 0.879006  | 0.533482  | 0.722805 | -0.0162135 |
| 4 | Fbln1    | 0 | -0.0312239 | 0.202464   | -0.29601   | 0.598414   | 2.07513    | 1.77526    | 2.42139   | 1.15738   | 2.20849  | 0.54403    |
| 4 | Fbln5    | 0 | -1.07847   | -0.309549  | 0.472563   | 1.81608    | 0.150836   | 2.3462     | 1.30775   | 0.998366  | 1.44496  | 0.807399   |
| 4 | Fbln7    | 0 | 0.2055     | -0.0389153 | -0.609959  | -0.803415  | 0.636093   | 1.88706    | 1.95518   | 1.06219   | 1.81347  | 1.32456    |

|   |        |   |            |            |           |           |           |          |         |          |          |           |
|---|--------|---|------------|------------|-----------|-----------|-----------|----------|---------|----------|----------|-----------|
| 4 | Fbn1   | 0 | 0.179084   | 1.3034     | 1.07221   | 0.932048  | 0.358552  | 2.80863  | 3.15935 | 1.18134  | 1.77841  | 1.37667   |
| 4 | Fbxl7  | 0 | -0.450486  | 2.15415    | 0.628133  | 2.21071   | 1.16912   | 1.9349   | 1.9398  | 0.378445 | 2.54384  | 1.05863   |
| 4 | Fcgr2b | 0 | 0.069215   | 0.109008   | 0.162446  | 1.42555   | 2.13585   | 2.21646  | 2.7271  | 1.70098  | 1.48541  | 0.547983  |
| 4 | Fcgr4  | 0 | 0.723343   | 0.788296   | 0.721642  | 2.01077   | 2.86336   | 2.71631  | 2.79114 | 1.99435  | 2.35681  | 1.25613   |
| 4 | Fcrl1  | 0 | 0.805767   | 1.01831    | 1.47494   | 0.290699  | 2.32273   | 2.91519  | 2.80439 | 1.93759  | 2.28642  | 0.877948  |
| 4 | Fgf2   | 0 | 0.794983   | 1.8333     | 1.94584   | 2.67078   | -0.685853 | 1.06527  | 2.119   | 1.26831  | 0.300235 | 1.44475   |
| 4 | Fgl2   | 0 | 0.0564774  | 1.11037    | 0.911763  | 1.65757   | 1.37191   | 2.04862  | 3.48386 | 1.73755  | 2.11283  | 0.719142  |
| 4 | Fgr    | 0 | -0.420353  | 0.0815865  | 0.699564  | 1.48207   | 2.53254   | 1.58028  | 2.48538 | 1.58789  | 1.95177  | 0.929538  |
| 4 | Fkbp15 | 0 | -0.629093  | -0.0856622 | -0.118765 | -0.291769 | 0.274965  | 1.62216  | 2.55314 | 0.903193 | 0.289924 | -0.795191 |
| 4 | Fmo5   | 0 | 1.08944    | 0.578039   | 0.610167  | -0.89311  | 0.727936  | 2.48538  | 2.22497 | 1.86143  | 1.55755  | 0.499673  |
| 4 | Fmod   | 0 | -0.656313  | -0.583414  | -1.227    | -1.37721  | -1.29468  | 0.970904 | 1.26011 | 0.637618 | 1.05477  | 0.401316  |
| 4 | Fnip2  | 0 | -0.385774  | 0.61711    | 0.396412  | 1.04965   | 1.23156   | 2.47162  | 2.53334 | 0.724067 | 0.664703 | -0.498533 |
| 4 | Folr1  | 0 | 0.82129    | 1.24349    | 2.04042   | 2.13626   | 2.87275   | 2.8344   | 2.77274 | 2.58956  | 2.87891  | 2.98401   |
| 4 | Foxc1  | 0 | -0.121131  | 0.767904   | 0.35849   | 1.05653   | 2.4598    | 2.77835  | 2.2706  | 1.46751  | 1.91594  | 0.848506  |
| 4 | Foxd1  | 0 | -1.46248   | -0.199111  | 0.267698  | 0.116065  | 1.37817   | 1.73652  | 1.65281 | 0.680226 | 1.74421  | 0.892494  |
| 4 | Foxj1  | 0 | 0.702106   | 0.131504   | 0.873708  | 1.09091   | 2.15853   | 2.73073  | 2.77996 | 1.8942   | 2.41243  | 1.82765   |
| 4 | Foxn3  | 0 | 1.27056    | 2.14932    | 1.99642   | 1.28068   | 0.300402  | 1.96647  | 3.11967 | 2.97143  | 2.36483  | 2.38319   |
| 4 | Frem2  | 0 | -1.67355   | -0.311013  | -0.791479 | 0.0274734 | -0.451284 | 1.14952  | 1.38405 | 1.30856  | 1.26801  | 0.486566  |
| 4 | Frk    | 0 | 1.54991    | 1.41003    | 2.16145   | 1.10983   | 2.08941   | 3.54349  | 2.35293 | 2.85535  | 2.62022  | 0.915678  |
| 4 | Frmf4a | 0 | 0.244359   | 0.392566   | 0.523788  | 1.89683   | 0.319887  | 2.53632  | 2.14518 | 0.356677 | 0.118992 | -0.599583 |
| 4 | Frmf4b | 0 | -0.0090038 | 0.388432   | -0.156317 | 0.34485   | 0.433863  | 2.24002  | 2.94961 | 1.50899  | 1.20495  | 0.854275  |
| 4 | Fsip1  | 0 | -0.238184  | 0.547939   | 0.792537  | 0.0612296 | 1.34355   | 1.58881  | 1.80234 | 1.54897  | 2.90645  | 2.2341    |
| 4 | Fut4   | 0 | 0.852853   | 1.04827    | 1.29551   | 1.79068   | 3.06991   | 3.16135  | 2.56794 | 2.04029  | 2.5277   | 1.16158   |
| 4 | Fzd5   | 0 | 2.50144    | 2.14888    | 2.9957    | 1.74473   | 2.10724   | 3.35673  | 3.19943 | 2.01748  | 3.61519  | 2.7455    |
| 4 | Fzd6   | 0 | -0.332225  | 0.253605   | 0.525954  | 0.803479  | 1.93549   | 2.75978  | 2.287   | 1.25994  | 1.719    | 0.510751  |
| 4 | Fzd7   | 0 | -0.627086  | 0.886314   | 0.945076  | 0.713635  | 1.95721   | 2.19905  | 2.47996 | 1.29181  | 1.97266  | 2.23586   |
| 4 | Gabrq  | 0 | 0.73561    | -0.151496  | 1.49946   | 1.26725   | 0.888373  | 0.665344 | 1.37401 | 1.45938  | 3.13315  | 2.68923   |
| 4 | Galnt3 | 0 | -0.0453679 | -0.377458  | 0.216149  | 0.188006  | 0.241643  | 2.25396  | 2.48008 | 0.280251 | 1.13293  | -0.502142 |
| 4 | Galnt4 | 0 | -0.308375  | 0.950542   | 1.25762   | 1.55411   | 2.02243   | 2.75575  | 2.91251 | 1.21155  | 1.41114  | 0.772381  |
| 4 | Galnt6 | 0 | 0.0086013  | -0.118147  | 1.14104   | 2.04722   | 2.55628   | 2.42209  | 2.21121 | 1.29542  | 1.91606  | 1.50832   |
| 4 | Gata3  | 0 | 1.33852    | 1.00408    | 0.599546  | -0.256273 | 0.450207  | 1.70708  | 1.8993  | 2.04147  | 2.98055  | 2.13765   |
| 4 | Gatm   | 0 | 0.802147   | 0.739275   | 1.24666   | 1.93033   | 2.75326   | 2.58903  | 2.7675  | 2.26865  | 2.38879  | 2.94843   |
| 4 | Gbgt1  | 0 | -0.338924  | -0.291139  | -0.497577 | -0.299274 | 1.08083   | 1.96551  | 2.32729 | 1.47301  | 0.925288 | 0.765199  |
| 4 | Gbp10  | 0 | 0.151454   | -2.02179   | 0.191875  | 0.364752  | 0.390587  | 1.04887  | 1.97757 | 0.592708 | 1.22621  | 0.905599  |
| 4 | Gbp2   | 0 | -0.35499   | 0.62877    | 1.27393   | 1.82814   | 2.05293   | 2.26561  | 3.002   | 1.48172  | 1.82925  | 0.894388  |
| 4 | Gbp3   | 0 | -0.558904  | -0.360686  | 0.248807  | 1.11356   | 1.94466   | 2.17061  | 2.39864 | 0.926986 | 1.12055  | 0.859111  |
| 4 | Gbp4   | 0 | -1.14852   | -0.190719  | 0.320097  | 0.733278  | 1.57593   | 1.54417  | 2.56457 | 1.0972   | 0.924366 | 0.652777  |
| 4 | Gbp5   | 0 | -1.53564   | 0.520644   | 1.15471   | 0.777733  | 1.28556   | 1.57008  | 2.36217 | 0.752854 | 0.970761 | 0.121013  |

|   |         |   |            |            |            |           |          |           |           |            |           |           |
|---|---------|---|------------|------------|------------|-----------|----------|-----------|-----------|------------|-----------|-----------|
| 4 | Gbp6    | 0 | -0.350736  | 0.184731   | 0.448497   | 1.14779   | 1.55437  | 2.17697   | 2.97414   | 1.48906    | 1.69992   | 0.918919  |
| 4 | Gbp9    | 0 | -0.459089  | 0.12567    | 0.629736   | 0.818626  | 1.54296  | 2.20404   | 2.95243   | 1.35389    | 1.55256   | 1.03149   |
| 4 | Gfap    | 0 | 0.104441   | 0.467701   | 0.607077   | 1.94884   | 2.63746  | 2.61834   | 2.47307   | 1.76664    | 1.80196   | 1.08326   |
| 4 | Ggh     | 0 | -0.413006  | 0.415635   | 0.384367   | 0.633242  | 2.44291  | 2.32297   | 2.32941   | 1.41114    | 1.72711   | 1.22108   |
| 4 | Ggta1   | 0 | -0.0447651 | 1.25597    | 1.23025    | 1.94562   | 2.57516  | 2.9429    | 2.72823   | 1.87316    | 2.11975   | 1.4888    |
| 4 | Ghsr    | 0 | 0.82021    | 1.39419    | 0.968064   | 0.638775  | -1.5303  | 0.764514  | -0.155422 | 0.972469   | 2.15666   | 1.71586   |
| 4 | Gimap4  | 0 | 0.197034   | 1.05018    | 1.00502    | 1.70793   | 2.21448  | 1.82553   | 3.26485   | 1.95289    | 2.80936   | 1.46785   |
| 4 | Gjb2    | 0 | 1.56184    | 2.88181    | 3.29645    | 2.14849   | 0.925665 | 2.23423   | 3.22662   | 1.98753    | 2.58354   | 1.46871   |
| 4 | Glb1    | 0 | 0.178397   | -0.37836   | -0.335845  | 0.0628642 | 0.970201 | 2.25787   | 2.69546   | 0.896151   | 0.69626   | 0.415107  |
| 4 | Glb1l   | 0 | 0.008629   | 1.33402    | -0.770687  | -0.567965 | 1.31241  | 2.50006   | 1.67441   | 0.95243    | 1.1643    | 1.00055   |
| 4 | Glis3   | 0 | -0.0153105 | 1.14025    | 1.6947     | 2.64483   | 1.08697  | 2.66447   | 2.78485   | 1.5971     | 1.22507   | 0.594462  |
| 4 | Gm11992 | 0 | 0.377503   | 0.589848   | 0.677029   | 1.19356   | 1.50661  | 2.2038    | 2.58273   | 1.74048    | 3.24996   | 1.8568    |
| 4 | Gm12250 | 0 | -0.861657  | 0.647445   | 1.11505    | 1.19028   | 2.07143  | 2.04179   | 2.63593   | 0.96942    | 1.59638   | 0.573835  |
| 4 | Gm13157 | 0 | 0.86892    | 1.11246    | 2.13251    | 0.982557  | 2.61903  | 1.93461   | 2.77236   | 2.01188    | 2.29889   | -0.104669 |
| 4 | Gm13251 | 0 | 0.0581779  | -0.0608184 | 0.180158   | 0.302875  | 1.30704  | 2.73313   | 2.54579   | 1.30463    | 1.09771   | 0.404009  |
| 4 | Gm13293 | 0 | 0.100287   | 1.34363    | 0.187695   | 1.5444    | 1.08492  | 2.43587   | 3.04356   | 1.49311    | 2.26551   | 1.87511   |
| 4 | Gm14685 | 0 | 0.353165   | 0.15537    | -0.948152  | 0.521224  | -2.02911 | 0.624083  | 0.639373  | 0.508719   | 1.44401   | 1.446     |
| 4 | Gm15880 | 0 | 1.04416    | 2.15233    | 1.8114     | 2.06868   | 3.2264   | 2.92268   | 3.61418   | 2.15507    | 1.98601   | 1.7143    |
| 4 | Gm17757 | 0 | 0.775995   | 1.12647    | 1.07337    | 0.372952  | 1.60234  | 2.23813   | 2.76021   | 1.25786    | 1.51352   | -0.812711 |
| 4 | Gm18853 | 0 | 0.803817   | 1.08776    | 1.09892    | 0.274371  | 1.43279  | 2.2263    | 2.7466    | 1.28612    | 1.46608   | -0.845793 |
| 4 | Gm1966  | 0 | -0.286201  | -0.127769  | -0.00973   | 0.409399  | 1.79614  | 1.7944    | 2.5764    | 1.32937    | 1.74851   | 0.306174  |
| 4 | Gm21188 | 0 | 0.105686   | 0.720996   | 0.190138   | 0.390232  | 2.32821  | 1.70141   | 2.79333   | 1.44052    | 2.20146   | 0.579818  |
| 4 | Gm21992 | 0 | -1.76977   | -1.50837   | -2.55323   | -1.11293  | -3.35103 | -0.909702 | -1.20866  | -0.711391  | -0.214478 | -0.549367 |
| 4 | Gm2a    | 0 | -0.0681057 | 0.0910374  | 0.0501172  | -0.463377 | 1.15875  | 1.95488   | 2.88014   | 0.55571    | 0.863557  | 0.247946  |
| 4 | Gm3558  | 0 | 1.01533    | 2.28249    | 1.31994    | 0.548972  | 0.569384 | 1.55647   | 1.96453   | 2.20131    | 2.2157    | 3.47879   |
| 4 | Gm3636  | 0 | 1.24329    | 1.12934    | 1.60232    | 1.47649   | -1.40382 | -0.518811 | 0.287985  | 1.20674    | 1.73435   | 1.15784   |
| 4 | Gm4070  | 0 | 0.409229   | 0.830188   | 0.665559   | 1.10108   | 2.06087  | 2.64475   | 3.27305   | 1.6361     | 2.03555   | 1.00384   |
| 4 | Gm4841  | 0 | 0.958263   | 1.57361    | 0.121401   | 1.00339   | 0.491777 | 1.95861   | 3.27871   | 0.323137   | 1.51279   | 2.14748   |
| 4 | Gm4951  | 0 | 0.478915   | 0.857548   | 1.16683    | 1.34167   | 2.76603  | 2.09408   | 3.32456   | 0.667687   | 1.4187    | 0.884486  |
| 4 | Gm5089  | 0 | 0.366785   | 0.266174   | -0.0190652 | -0.596769 | 1.23988  | 2.18792   | 1.80505   | 1.88507    | 2.25655   | 1.12177   |
| 4 | Gm5141  | 0 | -0.753591  | -1.91295   | -0.756884  | -0.777109 | -1.46867 | 0.828937  | 0.965531  | 0.97698    | 0.572166  | 0.0614109 |
| 4 | Gm5424  | 0 | 2.13267    | 2.7485     | 2.75387    | 3.17324   | 2.45774  | 2.82561   | 3.82482   | 2.89552    | 3.22755   | 3.41293   |
| 4 | Gm5431  | 0 | 0.99747    | 0.611856   | 0.691667   | 1.02054   | 1.61545  | 2.48111   | 3.07415   | -0.0579697 | 1.20489   | 0.122101  |
| 4 | Gm6377  | 0 | 1.78641    | 2.24862    | 1.92793    | 1.57831   | 2.93403  | 2.27042   | 3.78961   | 2.38436    | 2.88938   | 1.15872   |
| 4 | Gm7120  | 0 | 2.5722     | 2.67687    | 2.52037    | 0.252608  | 1.24575  | 2.27313   | 1.42696   | 1.84397    | 2.1329    | 3.10545   |
| 4 | Gm8979  | 0 | -0.150419  | 0.471591   | 0.490356   | 1.02237   | -2.49833 | 1.16516   | 1.02431   | 0.511174   | 0.121999  | 0.108745  |
| 4 | Gns     | 0 | -0.0234769 | 0.12032    | 0.0644941  | 0.164011  | 1.19491  | 2.64995   | 2.57528   | 1.0325     | 0.833036  | 0.0998951 |
| 4 | Gpam    | 0 | -1.08372   | 0.0759481  | -0.0134801 | 0.16062   | -1.61928 | 1.15489   | 2.00705   | 0.927454   | 0.49525   | -0.192005 |

|   |            |   |            |            |            |            |           |           |           |           |           |            |
|---|------------|---|------------|------------|------------|------------|-----------|-----------|-----------|-----------|-----------|------------|
| 4 | Gpnmb      | 0 | 0.159873   | 0.242552   | 0.426741   | 0.716928   | 1.98774   | 2.56898   | 2.42008   | 1.94409   | 2.26198   | 0.911764   |
| 4 | Gpr137b    | 0 | 0.189782   | 0.686924   | 0.227378   | -0.0023625 | 1.036     | 2.68502   | 2.80338   | 1.47568   | 1.61019   | 1.01212    |
| 4 | Gpr137b-ps | 0 | -0.0798307 | 0.100117   | 0.226672   | 0.560848   | 1.41318   | 2.65834   | 2.66644   | 1.19597   | 1.56615   | 0.578484   |
| 4 | Gpr149     | 0 | -0.131949  | 0.780693   | 0.516823   | 0.811431   | 0.111738  | 1.83111   | 1.91935   | 1.70976   | 2.73927   | 2.33714    |
| 4 | Gpr160     | 0 | -0.874684  | -0.0873791 | 0.329888   | 0.275028   | 2.01311   | 2.22456   | 2.05878   | 1.01859   | 1.00255   | 1.12303    |
| 4 | Gpr17      | 0 | -0.562251  | -0.0757015 | -0.118898  | -0.466175  | 0.444929  | 2.51824   | 1.4739    | 0.361277  | -0.219352 | -1.0248    |
| 4 | Gpr37      | 0 | 0.113773   | 0.0851119  | 0.297018   | -0.41286   | 0.750592  | 1.47483   | 2.30289   | 1.95648   | 1.85225   | 2.13101    |
| 4 | Gpr50      | 0 | 1.64       | 0.354537   | 0.419296   | 1.17679    | 0.249282  | 1.30474   | 1.89029   | 2.1675    | 2.89603   | 2.63199    |
| 4 | Gpr52      | 0 | -1.16806   | -1.04804   | -1.80311   | -1.63954   | -3.47247  | -0.718981 | -0.413243 | -0.251756 | -0.771977 | -0.115699  |
| 4 | Gpr6       | 0 | -1.16452   | -1.26196   | -2.29413   | -2.31797   | -2.80494  | -0.77656  | -0.510595 | -0.275336 | -0.134224 | -0.154753  |
| 4 | Gpr65      | 0 | 0.504519   | 0.740855   | 0.737537   | 1.6281     | 2.77592   | 2.69762   | 2.7724    | 1.72276   | 2.15652   | 0.849085   |
| 4 | Grin2a     | 0 | -0.483336  | -0.262416  | -1.12293   | -1.57157   | -3.5195   | -1.52865  | -0.370447 | -0.283012 | -0.49573  | -0.689664  |
| 4 | Gsap       | 0 | 0.402766   | 0.714233   | 0.590921   | 1.24156    | 2.26084   | 2.88979   | 3.023     | 1.88111   | 1.44695   | 1.13474    |
| 4 | Gstm2      | 0 | -0.0475029 | 0.685624   | -0.0506573 | 0.850718   | 2.19032   | 2.30124   | 2.5021    | 1.58113   | 2.17686   | 1.4928     |
| 4 | Gvin1      | 0 | 1.0449     | 0.778094   | 0.628788   | 1.03591    | 1.92791   | 2.4767    | 3.61473   | 1.53176   | 1.90484   | 0.945763   |
| 4 | Gypc       | 0 | 0.018888   | 0.294809   | 0.421922   | 1.34964    | 1.74103   | 2.613     | 2.78537   | 1.2955    | 2.16915   | 1.39415    |
| 4 | H2-Ab1     | 0 | 0.59596    | 0.627688   | 0.497284   | 1.13368    | 2.82897   | 1.69299   | 2.77621   | 2.20662   | 2.51409   | 1.20213    |
| 4 | H2-D1      | 0 | 0.245299   | 0.220044   | 0.358217   | 0.879836   | 2.29758   | 2.08155   | 2.98911   | 1.6394    | 1.76463   | 0.772525   |
| 4 | H2-Eb1     | 0 | 0.330892   | 0.191837   | 0.296818   | 0.774878   | 2.50543   | 1.33742   | 2.61862   | 2.06823   | 2.34562   | 1.13166    |
| 4 | H2-K1      | 0 | 0.145569   | 0.0070484  | 0.337497   | 0.645455   | 2.15986   | 2.05524   | 2.93918   | 1.53921   | 1.61661   | 0.939619   |
| 4 | H2-L       | 0 | 1.2858     | 0          | 0          | 0          | 0         | 2.06073   | 2.57253   | 1.62646   | 1.9643    | 0.795341   |
| 4 | H2-M3      | 0 | 0.0782657  | -0.0186151 | -0.272368  | 0.429846   | 1.76875   | 2.12558   | 2.71763   | 1.43205   | 1.41964   | 1.0626     |
| 4 | H2-Oa      | 0 | -0.448508  | -1.4022    | 0.177904   | -1.00517   | 1.03095   | 0.948736  | 1.8436    | 1.08441   | 1.09584   | 0.749396   |
| 4 | H2-Ob      | 0 | 0.85973    | 0.445628   | 0.243847   | 0.0818497  | 1.6532    | 2.33461   | 2.57487   | 2.11955   | 2.4391    | 1.21487    |
| 4 | H2-Q1      | 0 | 1.32242    | 1.52945    | 0.620349   | -0.0926816 | 0.334359  | 2.79676   | 1.63439   | 1.65407   | 2.67466   | 2.04848    |
| 4 | H2-Q8      | 0 | 1.18813    | 2.05788    | 1.68795    | 1.72223    | 2.4303    | 2.9086    | 3.51684   | 2.97969   | 2.9077    | 2.67839    |
| 4 | H2-Q9      | 0 | 0          | 1.54621    | 0.721508   | 1.43916    | 2.29405   | 1.99412   | 2.5602    | 1.93279   | 2.34032   | 0          |
| 4 | H2-T9      | 0 | 0.0030067  | 0.419994   | 0.0576831  | 0.626538   | 2.06713   | 2.35462   | 2.81317   | 0.511161  | 1.34575   | 1.18991    |
| 4 | Hba-a2     | 0 | 1.06121    | 1.46827    | 0.620314   | 1.70319    | 2.47689   | 2.57284   | 3.34348   | 2.83646   | 2.23335   | 1.71086    |
| 4 | Hcctr2     | 0 | 0.280675   | 0.489438   | -0.504179  | 0.545409   | -1.69661  | 1.17761   | 0.400772  | 2.20597   | 1.20716   | 0.681498   |
| 4 | Hdc        | 0 | 1.1492     | 1.77364    | 1.88086    | 2.84923    | 1.5654    | 1.77409   | 2.16738   | 1.74334   | 3.78409   | 2.99103    |
| 4 | Heatr5a    | 0 | -0.532654  | 0.452381   | 0.24316    | 1.11129    | 1.40883   | 2.70152   | 2.50106   | 1.31438   | 0.726805  | 0.44022    |
| 4 | Herc6      | 0 | 0.209015   | 0.234011   | 1.07078    | 1.03626    | -0.283035 | 2.13962   | 3.05656   | 0.358148  | 0.246834  | 0.837698   |
| 4 | Hfe        | 0 | 0.294285   | -0.0941352 | 0.309538   | 1.25766    | 2.21032   | 2.49083   | 2.62894   | 1.55803   | 1.81459   | 0.998882   |
| 4 | Hmgcs2     | 0 | 0.0042198  | 0.0853259  | 0.176633   | 1.49255    | 1.6482    | 2.95776   | 2.00447   | 1.15785   | 2.09986   | 1.3086     |
| 4 | Hnrnpf     | 0 | 0.33504    | 0.912191   | 1.36971    | 2.47818    | 2.8557    | 2.83037   | 2.82      | 1.80949   | 1.68947   | 1.52036    |
| 4 | Hp         | 0 | 0.791685   | 0.880636   | 1.23004    | 1.74116    | 2.79801   | 1.94932   | 3.39577   | 2.07693   | 2.18789   | 0.728138   |
| 4 | Hpse       | 0 | -0.274556  | -0.309942  | -0.103844  | -0.544594  | 0.630321  | 1.53619   | 2.39751   | 1.55937   | 1.47842   | -0.0704736 |

|   |               |   |            |            |            |            |           |           |          |          |          |            |
|---|---------------|---|------------|------------|------------|------------|-----------|-----------|----------|----------|----------|------------|
| 4 | Hspg2         | 0 | 0.559693   | 0.69309    | 1.05852    | 2.55076    | 2.68659   | 2.76831   | 2.71518  | 1.43623  | 1.74427  | 0.875371   |
| 4 | Hvcn1         | 0 | -0.395804  | 0.144964   | -0.216056  | 0.342176   | 1.69918   | 2.00967   | 2.28211  | 1.38543  | 1.45226  | -0.215473  |
| 4 | Hydin         | 0 | -0.469786  | -0.0021015 | 0.0190102  | 0.005776   | 0.277918  | 0.883898  | 1.95895  | 2.04295  | 2.17338  | 1.70199    |
| 4 | I830077J02Rik | 0 | -1.60407   | -0.675917  | -0.207884  | -1.19104   | 1.03906   | 1.12789   | 1.58255  | 0.798731 | 0.400477 | -0.0012096 |
| 4 | Icosl         | 0 | 1.66944    | 1.95587    | 3.09455    | 1.15733    | 1.98757   | 2.67145   | 3.23547  | 2.4486   | 2.7273   | 0.870357   |
| 4 | Ifi203        | 0 | -0.366696  | 0.151833   | 0.537262   | 1.26062    | 2.36261   | 1.65274   | 2.64086  | 0.889645 | 1.86281  | 0.359597   |
| 4 | Ifi204        | 0 | -0.0576467 | 0.503846   | 0.571914   | 1.54771    | 2.36215   | 2.4738    | 2.70685  | 1.51574  | 1.82029  | 0.634069   |
| 4 | Ifi47         | 0 | 0.0456709  | 0.630459   | 1.03271    | 1.15578    | 2.06018   | 2.27812   | 3.22459  | 1.81549  | 2.25405  | 1.37082    |
| 4 | Ifih1         | 0 | 0.0790594  | 0.0404521  | 0.407088   | 1.07228    | 1.87477   | 2.52901   | 2.8772   | 1.0394   | 1.26352  | 0.528432   |
| 4 | Ifit1         | 0 | -0.39302   | 0.319046   | 0.685696   | 1.31436    | 2.16804   | 2.31654   | 2.68463  | 0.79329  | 1.1943   | 0.36711    |
| 4 | Ifit2         | 0 | 0.298404   | 0.157652   | 0.44387    | 0.803505   | 2.08221   | 2.43819   | 3.06069  | 1.01582  | 1.4212   | 0.869922   |
| 4 | Ifit3         | 0 | 0.236387   | 0.533876   | 0.733857   | 1.50313    | 2.55517   | 2.58854   | 2.99185  | 1.10355  | 1.44503  | 1.00576    |
| 4 | Ifit3b        | 0 | 0.641653   | 0.98436    | 0.944001   | 1.80103    | 2.59498   | 2.86758   | 3.08717  | 1.41813  | 1.24076  | 0.668684   |
| 4 | Ifngr1        | 0 | -0.424126  | -0.260745  | 0.0338702  | 0.339185   | 1.65511   | 2.08043   | 2.61131  | 1.12705  | 0.993346 | 0.418154   |
| 4 | Igf1          | 0 | 0.193422   | -0.0019076 | 0.0182003  | 0.300856   | 1.51855   | 2.69548   | 2.49778  | 1.11272  | 0.959121 | 0.157698   |
| 4 | Igf2          | 0 | 0.0699874  | 0.354037   | 0.133352   | 0.1553     | -0.142017 | 2.53259   | 2.55219  | 1.21971  | 1.60357  | 0.951303   |
| 4 | Igfbp5        | 0 | -0.158951  | 0.154851   | -0.0305356 | 0.430509   | 0.213303  | 2.01646   | 2.70636  | 1.67837  | 1.66324  | 1.41065    |
| 4 | Igsf1         | 0 | 0.433367   | -0.192551  | 0.48044    | -0.556635  | 0.0276921 | 0.398123  | 2.10688  | 1.86857  | 2.28215  | 1.51464    |
| 4 | Igsf10        | 0 | -0.236536  | 0.526027   | 1.0834     | 1.73714    | 0.789667  | 2.53466   | 2.63316  | 1.61176  | 1.83492  | 0.107238   |
| 4 | Igsf6         | 0 | 0.0497298  | 0.843218   | 0.521869   | 1.09332    | 2.545     | 2.65427   | 2.65763  | 1.75424  | 1.87291  | 0.899942   |
| 4 | Igtp          | 0 | -0.175711  | 0.916864   | 0.744096   | 1.44581    | 1.42614   | 2.45973   | 3.35063  | 1.20218  | 1.30313  | 0.952031   |
| 4 | Iigp1         | 0 | -0.666085  | 0.523319   | 0.405999   | 1.09035    | 2.02148   | 2.0189    | 2.8163   | 1.07582  | 1.37555  | 0.656732   |
| 4 | Ikbke         | 0 | -0.949641  | -0.212407  | 0.144682   | 0.380441   | 1.64029   | 1.90195   | 2.33585  | 0.893592 | 1.23946  | 0.238408   |
| 4 | Ii10ra        | 0 | -0.228138  | -0.0675248 | 0.238322   | -0.0522619 | 1.76979   | 2.10424   | 2.56027  | 1.26714  | 1.2498   | 0.205474   |
| 4 | Ii10rb        | 0 | -0.503812  | -0.255394  | 0.289031   | 0.672648   | 1.96466   | 2.26789   | 2.22505  | 1.17576  | 1.42884  | 0.305717   |
| 4 | Ii13ra1       | 0 | 0.254854   | 1.41563    | 1.61581    | 2.50474    | 2.55862   | 2.76925   | 3.11462  | 2.10281  | 2.35443  | 1.53801    |
| 4 | Ii16          | 0 | -0.0980604 | 0.45988    | 0.363132   | 0.115783   | 1.96264   | 2.24224   | 2.35189  | 1.23573  | 1.71638  | -0.232793  |
| 4 | Ii18bp        | 0 | -0.651392  | -0.602895  | -0.0868597 | 0.128408   | 0.127894  | 1.59628   | 2.4098   | 0.250675 | 0.661429 | -1.01819   |
| 4 | Ii18r1        | 0 | -0.0337114 | 0.803489   | -0.646483  | 0.467328   | 1.55686   | -0.077173 | 2.76857  | 1.11006  | 1.84064  | 1.05593    |
| 4 | Ii2rg         | 0 | 0.130621   | 0.882117   | 1.26367    | 1.82097    | 2.73206   | 2.2265    | 3.01125  | 1.69004  | 1.84124  | 0.571664   |
| 4 | Ii6st         | 0 | 0.0043808  | 1.03198    | 0.766119   | 1.37712    | 0.541287  | 2.4259    | 3.30549  | 1.63948  | 1.82719  | 1.18308    |
| 4 | Ii7r          | 0 | -0.669415  | 0.426975   | -0.479556  | -0.4814    | 1.32907   | 1.17272   | 1.78625  | 0.49172  | 2.38967  | 0.148546   |
| 4 | Inmt          | 0 | 0.676996   | -0.514037  | 0.82899    | 0.507403   | 1.85439   | 1.9077    | 2.48453  | 2.26249  | 2.15045  | 1.58286    |
| 4 | Iqcg          | 0 | 0.267315   | 0.348538   | 0.117527   | -0.328172  | 1.3237    | 2.49687   | 1.82624  | 1.11508  | 2.33302  | 1.8292     |
| 4 | Iqck          | 0 | -0.473982  | -0.503977  | -0.153427  | 0.0790487  | 0.402566  | 0.134768  | 0.730294 | 0.492633 | 1.21592  | 3.05065    |
| 4 | Iqgap1        | 0 | 0.210654   | 0.736767   | 1.1108     | 1.36647    | 2.68682   | 2.79338   | 2.56609  | 1.09569  | 1.80917  | 0.443851   |
| 4 | Iqub          | 0 | 0.49782    | 0.595964   | 0.962398   | 1.20711    | 1.00996   | 2.68448   | 1.99165  | 1.83417  | 2.77914  | 2.88602    |
| 4 | Irak3         | 0 | -0.220255  | 1.88526    | 2.1835     | 2.48929    | 0.994713  | 2.58407   | 2.75788  | 1.91216  | 2.01953  | 1.70572    |

|   |         |   |            |            |            |            |            |            |            |          |           |           |
|---|---------|---|------------|------------|------------|------------|------------|------------|------------|----------|-----------|-----------|
| 4 | Irf1    | 0 | 0.98141    | 0.748775   | 1.42006    | 1.40716    | 2.15079    | 2.72108    | 3.65145    | 1.33943  | 1.55693   | 0.914072  |
| 4 | Irf7    | 0 | -0.564079  | -0.0574606 | 0.172874   | 0.960998   | 1.94126    | 2.06955    | 2.50943    | 0.62032  | 1.27122   | 0.281262  |
| 4 | Irf8    | 0 | -0.413873  | 0.141412   | 0.12319    | 0.708721   | 2.07635    | 2.26992    | 2.45238    | 1.21872  | 1.13542   | 0.250967  |
| 4 | Irgm1   | 0 | 0.451143   | 1.3975     | 1.38017    | 2.1871     | 2.73072    | 2.72326    | 3.13922    | 1.34147  | 1.37214   | 0.788436  |
| 4 | Irgm2   | 0 | -0.439751  | 0.438941   | 0.785251   | 1.00354    | 1.8983     | 2.35114    | 2.93101    | 1.41575  | 1.64595   | 1.03093   |
| 4 | Irs4    | 0 | -0.0388667 | 0.346115   | -0.0729231 | 0.497213   | -0.358399  | 1.03755    | 1.16412    | 1.02474  | 2.5048    | 2.56364   |
| 4 | Isg20   | 0 | 1.26176    | 1.39685    | 1.67317    | 2.24025    | 2.99307    | 3.17254    | 3.50436    | 2.00291  | 2.03368   | 1.44467   |
| 4 | Isl1    | 0 | 0.803338   | -0.341729  | 0.13961    | 0.576946   | 1.2402     | 2.64845    | 2.03693    | 1.1704   | 2.4364    | 1.69133   |
| 4 | Itga1   | 0 | -0.0558605 | 1.48597    | 1.28217    | 1.8518     | 2.61449    | 2.76192    | 3.01306    | 1.33532  | 1.61044   | 1.30163   |
| 4 | Itga6   | 0 | 0.469917   | 1.26601    | 1.52746    | 1.84402    | 2.16577    | 3.02074    | 2.99898    | 1.0863   | 0.860319  | 0.508366  |
| 4 | Itga8   | 0 | -0.441116  | 0.753889   | -0.005093  | -0.369256  | -0.827488  | 2.07206    | 2.19412    | 0.327874 | 1.02601   | -0.178848 |
| 4 | Itgal   | 0 | 0.22681    | 0.592593   | 0.185031   | 1.30064    | 2.1986     | 2.2248     | 2.90375    | 1.67731  | 1.72308   | 0.331369  |
| 4 | Itgax   | 0 | -0.120779  | 0.504166   | 0.789701   | 1.28871    | 1.92962    | 1.93403    | 2.79983    | 2.45533  | 2.34349   | 1.28071   |
| 4 | Itgb2   | 0 | -0.352248  | 0.237994   | 0.221019   | 1.03925    | 2.09233    | 2.39499    | 2.45153    | 1.44943  | 1.57425   | 0.5107    |
| 4 | Itgbl1  | 0 | -0.723964  | -0.0769341 | -1.44093   | -0.90143   | -1.26532   | 1.02749    | 1.45911    | 0.788012 | 1.06973   | 0.176645  |
| 4 | Itih2   | 0 | 0.150875   | 0.404408   | 0.322351   | 0.917209   | 1.7514     | 2.86461    | 2.75361    | 1.472    | 1.79692   | 0.954308  |
| 4 | Itih5   | 0 | -0.0785655 | 0.201681   | 0.0978684  | -0.407171  | 0.419656   | 2.39713    | 2.62708    | 1.16529  | 1.15585   | 0.823016  |
| 4 | Itk     | 0 | 0.254658   | 0.527307   | 0.681338   | -0.0329706 | -0.334411  | -0.0709041 | 2.83425    | 1.21206  | 2.1929    | 0.938669  |
| 4 | Itpkb   | 0 | 0.41088    | 0.809208   | 0.615713   | 1.61459    | -0.0851596 | 1.91247    | 2.79116    | 1.83292  | 2.65485   | 1.57731   |
| 4 | Itpril1 | 0 | 0.634972   | 1.24734    | 1.35411    | 1.76909    | 2.79783    | 3.14218    | 3.2351     | 1.6235   | 1.59566   | 1.67358   |
| 4 | Jchain  | 0 | -0.229281  | -0.621789  | -0.013118  | -0.299562  | 0.165324   | -0.901894  | 1.42426    | 0.550147 | 2.61602   | -0.174853 |
| 4 | Kcne1l  | 0 | 0.381887   | -0.722711  | -0.294572  | 0.104076   | 0.963231   | 2.28357    | 2.46372    | 1.174    | 1.00592   | 0.507708  |
| 4 | Kcne2   | 0 | 1.19145    | 0.106525   | 1.08198    | 1.45369    | 2.39129    | 2.57346    | 2.32474    | 2.31502  | 2.7795    | 2.53374   |
| 4 | Kcnj13  | 0 | 0.476627   | 0.477538   | 0.670611   | 1.60889    | 2.25728    | 2.39672    | 2.17371    | 2.68574  | 2.41122   | 2.50655   |
| 4 | Kctd16  | 0 | -0.332645  | -0.0888557 | -0.632514  | -1.3841    | -2.87379   | -1.4562    | -0.0808594 | 0.14557  | -0.300748 | 0.77319   |
| 4 | Kdr     | 0 | -0.796747  | 1.24572    | 2.07469    | 2.49269    | 0.705091   | 2.16888    | 2.01568    | 0.756725 | 1.47225   | 1.07683   |
| 4 | Kif13b  | 0 | 0.254844   | 0.35896    | 0.44616    | 0.020476   | -1.86198   | 0.7777     | 1.92466    | 1.57456  | 0.832944  | 1.19712   |
| 4 | Kif19a  | 0 | -0.265398  | -0.705657  | -0.157636  | -0.52858   | 0.529382   | 2.68921    | 1.61201    | 0.546571 | 0.886567  | 0.704112  |
| 4 | Kif9    | 0 | 0.437421   | 0.782683   | 0.551915   | 0.50567    | 0.199882   | 1.84395    | 2.25844    | 2.84298  | 2.39323   | 1.70308   |
| 4 | Kl      | 0 | 0.302801   | 0.988571   | 1.23127    | 1.61391    | 0.737515   | 2.39596    | 2.31159    | 2.57409  | 2.82838   | 2.55188   |
| 4 | Klhl6   | 0 | 0.596997   | 0.686033   | 1.24875    | 1.65912    | 2.63501    | 3.0426     | 2.85821    | 1.86868  | 1.6297    | 0.765091  |
| 4 | Klrk1   | 0 | 0.638542   | 1.53955    | 1.61689    | 0.342754   | 1.45651    | 0.416525   | 2.51416    | 1.31254  | 1.90802   | -1.002    |
| 4 | Krt18   | 0 | 2.05841    | 2.76157    | 2.88728    | 2.81673    | 3.26277    | 3.35237    | 2.84917    | 2.7485   | 3.51925   | 3.60001   |
| 4 | Krt8    | 0 | 1.87206    | 1.53032    | 2.58129    | 3.09437    | 0.422985   | 1.75643    | 2.29135    | 1.93465  | 2.76848   | 3.02425   |
| 4 | Krt80   | 0 | 2.81753    | 1.24655    | 2.04645    | 2.34015    | -0.119735  | 1.75409    | 2.38789    | 0.905538 | 0.748572  | 2.24327   |
| 4 | Lacc1   | 0 | -0.223611  | 0.250624   | 0.535181   | 1.08988    | 1.87475    | 2.60983    | 2.76489    | 1.03895  | 1.31743   | 0.549934  |
| 4 | Lag3    | 0 | 0.14087    | 0.17175    | 0.253853   | 0.25319    | 0.863195   | 1.67257    | 3.19088    | 2.01521  | 1.05608   | 0.527766  |
| 4 | Lama1   | 0 | -0.698187  | -0.367223  | -0.246331  | -0.0022047 | 0.769646   | 2.43101    | 2.11759    | 1.0042   | 0.891917  | 0.49515   |

|   |          |   |            |            |            |           |            |           |           |           |            |            |
|---|----------|---|------------|------------|------------|-----------|------------|-----------|-----------|-----------|------------|------------|
| 4 | Lama2    | 0 | -0.0452482 | 0.603059   | 1.04716    | -0.237103 | -0.229391  | 2.62344   | 2.34084   | 1.22514   | 1.31082    | 1.44827    |
| 4 | Lama4    | 0 | -1.64263   | 0.116287   | 0.497501   | 0.839929  | 0.332753   | 1.78144   | 2.18319   | 0.524023  | 0.688034   | -0.103742  |
| 4 | Lamb1    | 0 | -0.0403354 | 1.06025    | 0.803341   | 0.484474  | 1.35769    | 3.2561    | 2.33559   | 0.86049   | 0.832416   | 0.249044   |
| 4 | Lamb2    | 0 | 0.0963796  | 0.179855   | -0.168646  | 0.820287  | 1.94726    | 2.52119   | 2.50018   | 1.58976   | 1.65074    | 1.0145     |
| 4 | Lamc1    | 0 | -0.241215  | 0.756039   | 1.02037    | 1.30635   | -0.0783279 | 2.49562   | 2.66491   | 0.637771  | 0.491633   | -0.0524896 |
| 4 | Lamc3    | 0 | -0.204683  | -0.668584  | -0.517633  | -0.542742 | -0.316048  | 2.54804   | 1.46362   | 0.827296  | 0.833706   | 0.259732   |
| 4 | Lamp1    | 0 | 0.118      | 0.44232    | 0.590586   | 0.680855  | 1.20616    | 2.84975   | 2.90248   | 1.51994   | 1.38517    | 0.484364   |
| 4 | Lamp2    | 0 | -0.0670407 | 0.427033   | 0.563943   | 1.33503   | 1.26256    | 2.70356   | 3.0077    | 1.49473   | 1.64879    | 0.862654   |
| 4 | Lbp      | 0 | 0.398436   | 0.4106     | 0.784244   | 1.60563   | 1.73545    | 2.77717   | 3.12943   | 1.83507   | 2.11335    | 1.50547    |
| 4 | Lect1    | 0 | 0.0111698  | 0.714294   | 0.751758   | 0.195795  | 2.82397    | 1.57994   | 2.48618   | 2.13365   | 1.63934    | 1.71664    |
| 4 | Lgals3   | 0 | 0.288527   | 0.935513   | 1.22283    | 1.92883   | 2.84019    | 2.60715   | 2.64485   | 2.02395   | 2.60873    | 1.12814    |
| 4 | Lgals3bp | 0 | 0.0888668  | -0.145105  | 0.139443   | 0.886525  | 1.82524    | 2.36016   | 2.81103   | 1.26043   | 1.29672    | 0.625316   |
| 4 | Lhfp12   | 0 | 0.0437319  | 0.0821631  | 0.199894   | 0.494115  | 1.80147    | 2.46164   | 2.63121   | 1.04015   | 1.52097    | 0.187156   |
| 4 | Lhx8     | 0 | -0.773357  | -1.41285   | -0.761963  | 0.0261601 | -0.358591  | 0.661085  | 1.17211   | 1.29475   | 1.59754    | 1.12011    |
| 4 | Lima1    | 0 | 0.131794   | 1.00138    | 1.11726    | 1.63237   | 1.84616    | 2.85107   | 2.81716   | 0.514581  | 1.18879    | 0.221049   |
| 4 | Lims1    | 0 | 0.0086501  | 1.10762    | 1.11332    | 1.87011   | 1.83803    | 2.7538    | 2.90392   | 1.07121   | 1.03518    | 0.222826   |
| 4 | Lmo2     | 0 | -0.698632  | -0.31667   | -0.164378  | -0.167184 | 1.3289     | 2.23375   | 2.17555   | 0.919612  | 0.95027    | 0.417337   |
| 4 | Lmod1    | 0 | -0.352983  | -0.55129   | -0.0054706 | -0.16567  | 1.7001     | 1.59798   | 1.79055   | 1.38425   | 2.06095    | 1.31374    |
| 4 | Lox      | 0 | -0.201569  | 1.49917    | 1.37       | 1.48279   | 1.06679    | 2.93979   | 2.72117   | 1.39167   | 1.57392    | 0.234494   |
| 4 | Lpar6    | 0 | 0.856874   | 1.23834    | 1.2752     | 1.2277    | 2.9476     | 3.09596   | 2.84405   | 2.11625   | 1.7077     | 0.790141   |
| 4 | Lpl      | 0 | 0.108724   | 0.393261   | 0.540992   | 1.51683   | 1.73953    | 2.17474   | 2.63357   | 1.07807   | 2.12016    | -0.265596  |
| 4 | Lpp      | 0 | 0.5708     | 1.68781    | 1.21221    | 1.11112   | 3.19355    | 2.86515   | 2.74787   | 1.48637   | 2.16684    | 2.27896    |
| 4 | Lrmp     | 0 | 0.268412   | 0.312637   | 0.320041   | 0.439735  | 2.03631    | 2.62024   | 2.71988   | 1.24499   | 1.50583    | 0.436535   |
| 4 | Lrp2     | 0 | 0.456043   | 1.0452     | 1.28712    | 0.608521  | 0.477646   | 2.50147   | 2.45411   | 2.26263   | 2.79213    | 2.15054    |
| 4 | Lrrc23   | 0 | 1.24839    | 1.04854    | -0.202547  | 0.01046   | 1.16783    | 2.19714   | 2.06835   | 2.2596    | 2.47451    | 2.08153    |
| 4 | Lrrc27   | 0 | -0.478268  | 1.28991    | 0.853733   | -0.636645 | 1.53986    | 2.95387   | 0.703559  | 0.892334  | 0.302248   | 0.715409   |
| 4 | Lrrc51   | 0 | -0.659022  | 0.765397   | 0.185284   | 1.71921   | 2.2926     | 2.39631   | 1.04633   | 1.88855   | 1.46419    | 1.85497    |
| 4 | Lrrc9    | 0 | -0.0252239 | 0.804029   | 0.70444    | 0.545141  | -1.15768   | 1.54843   | 2.17322   | 1.7934    | 1.96177    | 0.787369   |
| 4 | Lrrtm4   | 0 | -0.518026  | -1.1732    | -1.89285   | -1.10172  | -2.9141    | -0.872436 | -0.282857 | 0.0888485 | -0.0846784 | 0.558526   |
| 4 | Lsp1     | 0 | -0.286352  | -0.245865  | 0.314785   | 0.450213  | 2.05502    | 2.19857   | 2.39168   | 0.809191  | 1.44531    | 0.270602   |
| 4 | Ltbp2    | 0 | 0.892523   | 1.02364    | 0.518023   | 1.63521   | 2.13447    | 2.18274   | 2.52483   | 1.12024   | 1.92779    | -0.710458  |
| 4 | Lum      | 0 | 0.0677315  | 0.228811   | 0.187005   | 0.826334  | 2.28889    | 2.08574   | 2.61198   | 1.6792    | 2.12597    | 0.848269   |
| 4 | Ly9      | 0 | -0.18798   | 0.243494   | 0.477375   | 0.968145  | 1.91265    | 2.26504   | 2.67212   | 1.92062   | 2.0604     | 0.927826   |
| 4 | Lyz1     | 0 | 0.618153   | 0.56247    | 0.418024   | 0.831945  | 2.46792    | 2.31199   | 2.60423   | 2.25427   | 2.45352    | 0.976732   |
| 4 | Lyz2     | 0 | 0.0172406  | 0.103158   | 0.018344   | 0.475308  | 1.93326    | 2.10355   | 2.3825    | 1.92047   | 2.08334    | 0.811762   |
| 4 | Maats1   | 0 | 0.827762   | 1.43414    | 0.430369   | 0.672598  | 1.00089    | 2.28725   | 2.02274   | 2.34118   | 2.87396    | 2.81585    |
| 4 | Mab2112  | 0 | 0.676219   | -0.0383059 | -1.54291   | -0.331525 | -0.259508  | 0.617296  | 0.769325  | 1.46711   | 2.17733    | 0.988862   |
| 4 | Mamdc2   | 0 | 0.284773   | 1.01988    | 1.3868     | 0.987349  | 1.28154    | 2.39407   | 2.84114   | 2.4771    | 2.96215    | 1.28789    |

|   |         |   |            |            |           |            |            |           |          |           |           |           |
|---|---------|---|------------|------------|-----------|------------|------------|-----------|----------|-----------|-----------|-----------|
| 4 | Man2b1  | 0 | -0.095301  | -0.423594  | -0.342957 | -0.0220743 | 1.41054    | 2.25499   | 2.39005  | 0.994397  | 0.828067  | 0.330611  |
| 4 | Man2b2  | 0 | -0.0394853 | -0.173995  | -0.304678 | 0.0672729  | 1.50586    | 2.4625    | 2.38351  | 0.770664  | 0.81037   | 0.272623  |
| 4 | Manba   | 0 | 0.65744    | 1.27584    | 0.722476  | 1.26418    | 2.54279    | 2.81933   | 3.12892  | 2.26858   | 1.804     | 0.997394  |
| 4 | Map3k1  | 0 | 0.0406432  | 0.303418   | 0.916304  | 1.12083    | 1.45337    | 1.8784    | 2.67562  | 0.220461  | 0.473419  | -0.904461 |
| 4 | Map3k8  | 0 | 0.567823   | 2.02004    | 3.04099   | 1.01517    | 1.99651    | 2.79961   | 2.85601  | 1.77247   | 1.74969   | 0.795555  |
| 4 | Mavs    | 0 | -0.45926   | -0.0872879 | 0.559473  | 1.33932    | 1.92899    | 2.48103   | 2.33273  | 1.68673   | 1.48073   | 1.18546   |
| 4 | Mcoln2  | 0 | -0.0847732 | 1.21593    | 0.792677  | 1.7863     | 1.92828    | 1.98394   | 2.90023  | 2.07837   | 2.47476   | 0.505329  |
| 4 | Mdfic   | 0 | 0.111909   | 0.37107    | 0.611741  | 1.33748    | 2.51343    | 2.61646   | 2.61591  | 1.71145   | 1.97489   | 1.10255   |
| 4 | Mertk   | 0 | 0.74359    | 1.09258    | 0.992187  | -0.242796  | -0.133923  | 2.07748   | 2.4975   | 0.289142  | -0.189873 | -0.612728 |
| 4 | Met     | 0 | -2.09238   | -0.149654  | -0.678534 | 0.440585   | -2.10912   | -0.057289 | 0.188762 | 0.506807  | 0.186395  | -1.69612  |
| 4 | Mfap4   | 0 | -0.611868  | -0.91371   | -1.31323  | -0.356969  | -2.09114   | 1.78099   | 0.497767 | -0.435619 | 0.130786  | -0.532885 |
| 4 | Mfrp    | 0 | 1.09845    | 0.868273   | 1.62605   | 1.9991     | 1.28847    | 2.92809   | 2.95561  | 3.13252   | 1.96598   | 2.63757   |
| 4 | Mfsd1   | 0 | 0.0809104  | 0.630757   | 0.474105  | 0.953776   | 2.34148    | 2.85375   | 2.53776  | 1.3091    | 1.16911   | 0.444628  |
| 4 | Mgst1   | 0 | 0.350933   | 0.66963    | 0.925951  | 1.89249    | 2.62901    | 2.63373   | 2.69794  | 2.06376   | 2.54373   | 1.40086   |
| 4 | Micall1 | 0 | 0.73692    | 0.912599   | 1.41568   | 1.96708    | 2.09396    | 3.34943   | 3.26941  | 1.71423   | 1.57135   | 1.45759   |
| 4 | Mir207  | 0 | 0.483654   | -0.159953  | 0.0353473 | -0.195082  | -0.0139586 | 0.888535  | 1.10134  | 1.6515    | 1.72323   | 2.90666   |
| 4 | Mitf    | 0 | 0.439457   | 1.34321    | 1.44882   | 1.32539    | 0.85545    | 2.70042   | 3.25257  | 1.66838   | 1.627     | 0.136669  |
| 4 | Mlf1    | 0 | 1.97726    | 2.8188     | 3.19404   | 1.30566    | 2.84377    | 3.05386   | 2.07768  | 2.77055   | 3.46437   | 2.0472    |
| 4 | Mmp12   | 0 | -0.842447  | 0.625651   | 1.51284   | 2.00625    | 1.78245    | 2.00729   | 1.95481  | 1.47964   | 2.52753   | 1.45552   |
| 4 | Mmp13   | 0 | 1.03629    | 2.19811    | 2.34343   | 2.11794    | 2.4231     | 2.6807    | 3.17914  | 2.28478   | 3.47668   | 1.1743    |
| 4 | Mmp19   | 0 | 0.500745   | 1.22176    | 1.77877   | 2.3079     | 2.86679    | 2.69283   | 3.07151  | 1.76001   | 2.12755   | 0.877789  |
| 4 | Mmp2    | 0 | -0.0580807 | 0.133649   | -0.437409 | 0.160464   | 1.59226    | 2.37673   | 2.46735  | 0.977341  | 1.31805   | 0.567759  |
| 4 | Mmp3    | 0 | 0          | 1.06076    | 1.80604   | 2.67341    | 2.40815    | 1.99639   | 2.51337  | 2.36687   | 2.76602   | 1.51196   |
| 4 | Mnda    | 0 | 1.18007    | 1.78356    | 1.87664   | 2.62281    | 3.07713    | 2.98962   | 3.43895  | 2.38251   | 2.78028   | 1.57792   |
| 4 | Mob1a   | 0 | -0.3125    | 0.782557   | 0.776302  | 1.30695    | 0.20028    | 2.44687   | 2.95662  | 1.4113    | 1.35333   | 0.503149  |
| 4 | Moxd1   | 0 | -0.232305  | 0.170128   | -0.7283   | -0.943223  | -0.625262  | 1.53669   | 2.3691   | 0.655858  | 0.583781  | 0.667541  |
| 4 | Mpeg1   | 0 | -0.0084055 | 0.0319881  | 0.0985004 | 0.397251   | 2.03605    | 2.4818    | 2.40526  | 1.44045   | 1.40762   | 0.479573  |
| 4 | Mr1     | 0 | 0.470601   | 0.443665   | 0.928215  | 0.487896   | 1.78265    | 2.90613   | 2.91109  | 1.80103   | 1.97178   | 1.55177   |
| 4 | Mrc1    | 0 | 0.0033673  | 0.885747   | 0.534087  | 1.69552    | 1.6708     | 2.07146   | 3.03628  | 1.15      | 2.22964   | 0.233856  |
| 4 | Mrc2    | 0 | -0.538771  | -0.173858  | -0.474386 | 0.156754   | 1.51878    | 2.03621   | 2.32168  | 0.966466  | 1.30142   | 0.861255  |
| 4 | Ms4a1   | 0 | 0          | 1.10638    | 1.65404   | 1.60747    | 2.03523    | 1.73162   | 2.3556   | 2.49312   | 3.32022   | 1.28553   |
| 4 | Ms4a4b  | 0 | -0.879294  | -0.334419  | -0.948537 | -1.81624   | 0.764196   | 0.496142  | 1.53102  | 0.704956  | 1.12882   | 0.184203  |
| 4 | Ms4a4c  | 0 | 0.181729   | 0.664453   | 0.638802  | 0.750576   | 2.80404    | 1.81321   | 2.79281  | 0.887656  | 2.16064   | 0.733439  |
| 4 | Mtbp    | 0 | -0.580984  | 0.404517   | 0.485526  | 1.66783    | 1.78067    | 2.50032   | 1.9398   | -0.141425 | 0.819618  | 0.159019  |
| 4 | Mx1     | 0 | 0.340529   | 0.844437   | 0.712359  | 1.63179    | 2.36224    | 2.75987   | 3.0879   | 1.20961   | 1.81462   | 0.894017  |
| 4 | Mx2     | 0 | 0.140183   | 0.837379   | 1.284     | 1.99841    | 2.15662    | 2.6861    | 2.86994  | 0.963523  | 0.957863  | 0.344462  |
| 4 | Mxra8   | 0 | -0.174314  | -0.327523  | 0.0063201 | 0.573058   | 1.87443    | 2.25557   | 2.23937  | 1.37734   | 1.82438   | 0.915235  |
| 4 | Myb     | 0 | 0.688125   | 1.05563    | 1.04527   | 0.835193   | -0.575243  | 2.11922   | 2.24239  | 2.39031   | 2.04852   | 2.18134   |



|   |         |   |            |            |            |            |            |          |           |          |           |            |
|---|---------|---|------------|------------|------------|------------|------------|----------|-----------|----------|-----------|------------|
| 4 | Myh11   | 0 | 0.422882   | 0.378053   | 0.0154982  | 0.339372   | 0.350829   | 2.21484  | 2.1181    | 2.1661   | 2.34222   | 1.832      |
| 4 | Mylip   | 0 | -0.320917  | 0.46548    | 1.06378    | 0.387542   | 1.29236    | 2.65336  | 2.82602   | 1.17662  | 1.05714   | 0.36557    |
| 4 | Myo1e   | 0 | 0.54865    | 1.15779    | 1.17025    | 1.53414    | 2.2602     | 3.11718  | 3.09262   | 1.27161  | 1.56563   | 0.586048   |
| 4 | Myo1g   | 0 | 0.157081   | 0.78918    | 0.658291   | 0.79526    | 2.581      | 2.50541  | 2.83223   | 1.54365  | 1.84329   | 0.768254   |
| 4 | Myoc    | 0 | -0.322223  | -0.294985  | -0.916199  | -1.42815   | -1.22356   | 0.238411 | 1.65749   | 0.934517 | 1.22155   | 0.526764   |
| 4 | Myof    | 0 | -0.372379  | 0.369796   | 0.602663   | 1.24011    | 1.84634    | 2.34059  | 2.64826   | 1.40195  | 2.16389   | 0.689584   |
| 4 | Myom1   | 0 | 0.416086   | 1.55385    | 0.548314   | -0.86503   | -0.602712  | 1.90204  | 2.2433    | 0.889721 | 1.53455   | 0.655837   |
| 4 | Myrf    | 0 | 0.389897   | 0.648456   | 1.29873    | 2.94055    | 0.899099   | 2.50276  | 2.93776   | 1.927    | 1.2945    | 1.63625    |
| 4 | Naip2   | 0 | 0.0033909  | 0.708339   | 0.529471   | 1.39469    | 2.35087    | 2.55141  | 2.85683   | 1.42595  | 1.22518   | 0.519251   |
| 4 | Naip5   | 0 | -0.118102  | 0.716819   | 1.02995    | 0.937738   | 2.03799    | 2.69739  | 2.44746   | 1.07256  | 0.530209  | -0.178109  |
| 4 | Naip6   | 0 | -1.14099   | -0.555787  | -0.18422   | 0.0897295  | 1.52839    | 1.89151  | 1.77718   | 0.997184 | 0.921668  | -0.0089217 |
| 4 | Nat2    | 0 | 0.711406   | 0.821181   | 1.44759    | 1.09341    | 2.60515    | 3.2125   | 2.68235   | 1.50867  | 2.60329   | 1.54411    |
| 4 | Nckap1l | 0 | -0.0566111 | -0.0333118 | 0.29219    | 1.01726    | 2.04622    | 2.49819  | 2.57314   | 1.29498  | 1.29997   | 0.421233   |
| 4 | Neat1   | 0 | 0.266598   | 1.26209    | 1.72583    | 1.61466    | 2.91544    | 3.27333  | 2.50632   | 1.41448  | 1.80386   | 1.25191    |
| 4 | Nek5    | 0 | -0.326226  | 0.0352691  | -0.0850773 | 1.00877    | 1.33946    | 1.69034  | 1.97051   | 1.59934  | 2.30513   | 2.2629     |
| 4 | Nfatc1  | 0 | 0.139852   | 0.646358   | 0.172578   | 0.593176   | 1.75536    | 2.12325  | 2.6444    | 0.728908 | 0.981395  | -0.738254  |
| 4 | Nfe2l2  | 0 | 0.691069   | 0.821125   | 1.21052    | 1.33052    | 2.79511    | 2.90012  | 2.99411   | 1.99558  | 1.97619   | 0.949518   |
| 4 | Nfkb1   | 0 | -0.0004363 | 0.500441   | 1.09493    | 1.14606    | 1.94282    | 2.40978  | 3.0896    | 1.06652  | 1.52179   | 0.245344   |
| 4 | Nfya    | 0 | 0.457763   | 1.12252    | 1.05329    | 1.07397    | -0.0422813 | 2.49094  | 1.7486    | 0.679564 | -0.607055 | -0.872749  |
| 4 | Nhlrc3  | 0 | 0.220357   | 1.43073    | 1.68993    | 0.18845    | -0.142512  | 2.15267  | 3.00017   | 1.17725  | 0.926774  | 0.367108   |
| 4 | Nid1    | 0 | -0.0793978 | 0.513638   | 0.831813   | 1.3317     | 1.70718    | 2.91845  | 2.68343   | 0.949708 | 0.899065  | 0.272698   |
| 4 | Nid2    | 0 | 0.440463   | 1.14183    | 1.20402    | 1.45181    | 2.66347    | 3.1894   | 2.9187    | 1.85893  | 2.11173   | 1.40543    |
| 4 | Nlrc5   | 0 | 0.610509   | 0.656006   | 1.02331    | 1.84389    | 2.46931    | 2.46877  | 3.1355    | 1.63877  | 1.48275   | 0.319116   |
| 4 | Nod1    | 0 | 0.357374   | 0.413582   | 1.02052    | 1.17896    | 1.85544    | 2.8131   | 3.22677   | 1.66966  | 1.83086   | 1.46504    |
| 4 | Notch2  | 0 | -0.358852  | 0.206932   | 0.361219   | -0.0298149 | 0.782245   | 2.24326  | 2.61858   | 1.37285  | 1.87201   | 1.08981    |
| 4 | Npy2r   | 0 | -0.802048  | -0.209421  | -1.48885   | -0.493255  | -2.3916    | 0.540204 | -0.381109 | 0.527122 | 1.09605   | 0.392339   |
| 4 | Nqo1    | 0 | 0.883723   | 1.63214    | 1.92976    | 3.11743    | 2.41915    | 2.75984  | 2.69644   | 2.30912  | 3.23625   | 2.9107     |
| 4 | Nrk     | 0 | 0.0746356  | 0.0015105  | -0.297119  | -0.0802313 | -0.461876  | 1.84883  | 2.20441   | 1.22914  | 1.80048   | -0.213745  |
| 4 | Nt5dc1  | 0 | 1.17473    | 1.6736     | 1.58718    | 2.7533     | 2.59667    | 3.55597  | 3.19892   | 1.4934   | 1.94596   | 2.02174    |
| 4 | Ntrk1   | 0 | -0.784869  | -0.141359  | -0.297084  | 0.498563   | 0.657711   | 1.40528  | 1.57556   | 2.18084  | 0.9367    | 2.13799    |
| 4 | Nynrin  | 0 | -0.283043  | -0.954881  | -0.0451199 | 0.79227    | 0.41219    | 1.64329  | 1.58685   | 1.12113  | 1.88227   | 2.09072    |
| 4 | Oas1c   | 0 | -0.380981  | 0.261953   | 0.0409723  | -0.0127622 | 1.99466    | 2.26237  | 2.09782   | 0.698647 | 1.19883   | 1.87658    |
| 4 | Oas1g   | 0 | -0.846467  | -1.66611   | -0.197645  | -0.185575  | 1.04116    | 1.29566  | 1.57161   | 0.846854 | 1.18357   | 0.405856   |
| 4 | Oas2    | 0 | -0.0266424 | 0.486849   | 0.86241    | 1.14003    | 2.40432    | 2.32895  | 2.94373   | 1.03784  | 1.60777   | 0.512976   |
| 4 | Oas3    | 0 | 0.0273023  | 0.985835   | -0.0597162 | 0.524954   | 2.06534    | 2.24526  | 2.75622   | 0.698211 | 1.74314   | 0.44447    |
| 4 | Oasl1   | 0 | 0.950244   | 1.606      | 1.75017    | 2.35873    | 2.59742    | 2.84723  | 3.55026   | 0.943522 | 2.28365   | 1.85773    |
| 4 | Oasl2   | 0 | 0.0455047  | 0.257459   | 0.491887   | 1.35985    | 2.22362    | 2.55954  | 2.85443   | 1.13284  | 1.5209    | 0.928379   |
| 4 | Ogn     | 0 | -0.0830738 | 0.0085897  | -0.670581  | -0.369222  | 0.136947   | 1.82093  | 1.84579   | 1.42879  | 2.00602   | 1.23338    |

|   |          |   |            |            |           |           |            |            |           |            |           |            |
|---|----------|---|------------|------------|-----------|-----------|------------|------------|-----------|------------|-----------|------------|
| 4 | Onecut1  | 0 | 0.0732909  | -0.498689  | -0.157893 | 0.298918  | 1.38068    | 0.211261   | 0.151823  | 0.893644   | 2.06774   | 2.67628    |
| 4 | Opalin   | 0 | -0.447138  | -0.781808  | 0.179829  | 1.53308   | 1.88827    | 1.46297    | 1.70317   | 1.36167    | 1.88431   | 1.62835    |
| 4 | Osr1     | 0 | -0.983805  | -0.973824  | -0.993472 | -0.210344 | 0.843561   | 1.43884    | 1.54466   | 0.650816   | 1.45926   | 0.612825   |
| 4 | Otx2     | 0 | 1.25655    | 1.25427    | 1.59376   | 1.6307    | 3.12614    | 2.45766    | 1.87355   | 2.36176    | 3.34898   | 3.07031    |
| 4 | P2rx7    | 0 | -0.390079  | 1.04335    | 0.745912  | 0.660096  | 2.36016    | 2.36679    | 2.72102   | 1.28224    | 1.18375   | 0.469472   |
| 4 | P2ry14   | 0 | 0.668799   | 0.635471   | 0.887545  | 0.374003  | 2.69127    | 2.69346    | 2.62749   | 1.75308    | 1.84218   | 0.720645   |
| 4 | P3h2     | 0 | 0.967685   | 1.03176    | 1.71832   | 1.31491   | 1.63213    | 2.16905    | 3.60315   | 2.29554    | 2.99815   | 2.17311    |
| 4 | Pabpc5   | 0 | 0.867228   | 1.40027    | -0.40199  | 0.281129  | -1.12159   | 0.985554   | 2.0235    | 2.0702     | 1.41166   | 0.431488   |
| 4 | Padi2    | 0 | -0.483548  | -0.50465   | -0.75116  | -0.912008 | -0.0434185 | 1.00697    | 1.93506   | 1.23554    | 1.52045   | 0.979046   |
| 4 | Parp14   | 0 | -0.731004  | 0.256062   | 0.682245  | 0.806913  | 1.84268    | 2.24846    | 2.6131    | 0.866741   | 1.34769   | 0.416068   |
| 4 | Parp4    | 0 | -0.294113  | 0.352207   | 0.320867  | 0.702938  | 1.6426     | 2.55535    | 2.68644   | 1.28053    | 1.80212   | 0.831437   |
| 4 | Parp9    | 0 | -0.240667  | 0.564587   | 0.806785  | 1.30514   | 2.07902    | 2.55018    | 2.86866   | 1.08699    | 1.40282   | 0.501482   |
| 4 | Pawr     | 0 | 1.06       | 2.18638    | 2.51159   | 2.86666   | 0.918866   | 2.82897    | 2.7815    | 2.4783     | 3.17666   | 2.32505    |
| 4 | Pcdh20   | 0 | -0.610154  | -0.263684  | -1.37636  | -1.85678  | -2.43722   | -0.881647  | -0.119503 | 0.554185   | 0.835359  | -0.0716123 |
| 4 | Pcdha7-g | 0 | -0.55883   | -0.0331023 | -1.49912  | -1.62714  | -3.1144    | -0.704758  | -0.680634 | 0.179849   | -0.158055 | 0.114147   |
| 4 | Pcdhb2   | 0 | -0.413597  | 0.294827   | 0.267169  | -1.24664  | -1.38181   | 0.229912   | 1.02761   | 0.983419   | 0.816454  | 2.0193     |
| 4 | Pcdhb21  | 0 | -1.00034   | -2.93139   | -1.40198  | -0.588832 | -3.11346   | -1.63234   | -0.886052 | -0.85895   | -0.49497  | -0.458078  |
| 4 | Pcdhb9   | 0 | -0.493947  | -0.968937  | -1.46411  | -1.08339  | -1.26971   | -0.0849009 | -0.331962 | 0.337587   | 0.883696  | 1.86898    |
| 4 | Pdcd1    | 0 | -0.127871  | 0.735949   | 1.06425   | 0.933479  | 2.43067    | 1.93337    | 2.96147   | 2.14131    | 1.60864   | 0.578804   |
| 4 | Pdgfd    | 0 | 0.574297   | 0.643805   | 0.408643  | 0.977493  | -0.965649  | 2.42833    | 1.98788   | 1.88266    | 1.82957   | 0.982515   |
| 4 | Pfkfb3   | 0 | 1.29237    | 2.52836    | 2.19976   | 1.2716    | 0.336286   | 2.27593    | 3.13328   | 1.48752    | 0.830184  | 0.462129   |
| 4 | Pgm5     | 0 | 0.778378   | 1.15611    | 0.385285  | 1.06341   | 2.13783    | 2.82964    | 2.66752   | 1.83445    | 2.63312   | 2.46754    |
| 4 | Pgpep1   | 0 | 0.430062   | -0.966427  | -0.172791 | 0.295272  | 1.20491    | 2.37079    | 2.06207   | 1.11111    | 1.42967   | 0.319359   |
| 4 | Pgr15l   | 0 | 0.629349   | 0.657389   | 1.03757   | 1.53511   | -2.1667    | 0.32999    | -0.143018 | 0.665923   | 1.03964   | 1.22074    |
| 4 | Phf11c   | 0 | -1.25464   | 1.29364    | 1.22849   | 0.83948   | 0.905151   | 1.4262     | 2.43268   | 0.564143   | 0.673596  | -0.503427  |
| 4 | Phf11d   | 0 | 0.212277   | 0.725821   | 0.636396  | 1.57432   | 2.25443    | 2.70738    | 3.05239   | 1.5256     | 1.93762   | 1.09027    |
| 4 | Phldb2   | 0 | -1.21776   | 0.849994   | 0.210935  | 0.560143  | 1.7798     | 1.62661    | 2.00898   | 1.00536    | 2.13976   | 0.707379   |
| 4 | Phyhd1   | 0 | 0.180006   | -0.157605  | 0.552414  | 0.840391  | 1.49911    | 2.95697    | 2.14121   | 0.577983   | 0.855342  | -0.210173  |
| 4 | Pik3ap1  | 0 | -0.156985  | 0.782178   | 0.62907   | 1.16649   | 1.66683    | 2.71333    | 2.89366   | 1.31773    | 1.55818   | 0.360498   |
| 4 | Pirb     | 0 | 0.32856    | 0.720319   | 0.866979  | 1.58606   | 2.76167    | 2.29737    | 2.77438   | 1.82043    | 2.5796    | 1.003      |
| 4 | Pla1a    | 0 | 0.209027   | 0.771092   | 1.12037   | 1.45144   | 1.71009    | 2.27767    | 2.63284   | 1.52115    | 1.92252   | -0.596563  |
| 4 | Pla2g15  | 0 | -0.0088975 | -0.653127  | -0.634593 | -0.788095 | 0.687966   | 1.806      | 2.27985   | -0.0012857 | 0.478563  | -0.338722  |
| 4 | Pla2g4a  | 0 | -0.338651  | 0.184605   | 0.432814  | 1.89225   | 2.07731    | 2.34647    | 2.35304   | 1.21175    | 1.38565   | 0.298447   |
| 4 | Pla2r1   | 0 | 0.34459    | 0.779745   | 0.260154  | 2.00447   | 2.35896    | 2.71599    | 2.39769   | 1.91011    | 2.06629   | 0.674099   |
| 4 | Plac8    | 0 | -1.0744    | 0.946095   | 0.76079   | 1.14324   | 2.34955    | 1.36175    | 2.31551   | 1.15675    | 1.79343   | 0.467282   |
| 4 | Plau     | 0 | 0.417478   | 1.54639    | 2.53318   | 1.72327   | 2.88661    | 2.70789    | 3.15309   | 2.0103     | 2.01541   | 1.22525    |
| 4 | Plce1    | 0 | 0.40385    | 1.12365    | 2.22532   | 3.16886   | 1.69611    | 2.71473    | 2.83331   | 2.27074    | 1.9478    | 1.42591    |
| 4 | Pld1     | 0 | 1.1141     | 1.55542    | 1.02694   | 0.902367  | 1.526      | 3.28155    | 3.31937   | 1.89325    | 1.72378   | 2.38175    |

|   |         |   |            |            |            |           |           |           |          |          |          |          |
|---|---------|---|------------|------------|------------|-----------|-----------|-----------|----------|----------|----------|----------|
| 4 | Plek    | 0 | 0.552712   | 0.862456   | 1.53224    | 1.95389   | 2.2883    | 2.82076   | 3.0598   | 1.62936  | 1.57289  | 0.308839 |
| 4 | Plekhf2 | 0 | 0.473281   | 0.893003   | 1.44614    | 1.44411   | 2.21625   | 3.22875   | 3.20265  | 1.55206  | 1.54409  | 1.46662  |
| 4 | Plekho2 | 0 | -0.16287   | 0.0610645  | 0.75777    | 0.678697  | 1.76629   | 2.3787    | 2.69472  | 0.147054 | 1.28915  | 0.258899 |
| 4 | Plod2   | 0 | -0.386094  | 1.90079    | 1.34098    | 1.59954   | 2.92602   | 2.33192   | 2.28393  | 1.45169  | 1.78702  | 2.32061  |
| 4 | Plscr1  | 0 | 0.154226   | 1.73328    | 2.28634    | 2.41698   | 2.40228   | 2.5526    | 2.97488  | 2.4588   | 2.75244  | 2.26807  |
| 4 | Plscr2  | 0 | -0.568626  | 0.777211   | 1.47209    | 1.60082   | 2.50935   | 2.19384   | 2.58966  | 1.77378  | 1.96603  | 1.35917  |
| 4 | Plscr4  | 0 | -0.432094  | -0.377278  | -0.0508872 | 0.224385  | 1.67419   | 1.84349   | 2.08441  | 1.52296  | 1.98203  | 0.860332 |
| 4 | Pltp    | 0 | -0.175376  | -0.586323  | -0.843796  | -0.763295 | 0.902159  | 1.26308   | 1.97433  | 1.14291  | 1.59952  | 0.915437 |
| 4 | Plxnb2  | 0 | -0.0449179 | -0.242208  | -0.16341   | 0.265325  | 1.54023   | 2.54246   | 2.35252  | 1.08227  | 1.08692  | 0.364728 |
| 4 | Pm20d1  | 0 | -0.651098  | 0.741972   | 1.68752    | -0.503693 | 1.63213   | 1.55884   | 2.54478  | 1.48476  | 1.2489   | 0.668844 |
| 4 | Pmp22   | 0 | 1.07823    | 1.72146    | 1.48726    | 1.10738   | 2.87297   | 2.83278   | 3.56828  | 2.01847  | 1.51581  | 1.36765  |
| 4 | Pnpla7  | 0 | 0.858527   | 0.854214   | 1.1296     | -0.201553 | 1.32321   | 2.62941   | 2.92647  | 1.16261  | 0.367327 | 0.220626 |
| 4 | Podn    | 0 | 0.0318725  | -0.0371887 | -2.14199   | -0.951419 | -1.80689  | 0.0119884 | 0.595116 | 0.193769 | -0.26467 | -2.15606 |
| 4 | Podxl   | 0 | -0.883351  | -0.0756244 | 0.645148   | 2.06943   | 0.232981  | 0.849774  | 0.821275 | 0.573409 | 0.305085 | 2.72804  |
| 4 | Pon3    | 0 | 0.396837   | 0.354923   | 0.670325   | 1.05935   | 2.29924   | 2.81955   | 2.82479  | 1.8795   | 1.75277  | 1.09957  |
| 4 | Postn   | 0 | 0.510264   | 0.311495   | 0.737851   | 1.46709   | 1.82778   | 2.75088   | 2.91279  | 2.20014  | 2.18954  | 1.09417  |
| 4 | Pou2af1 | 0 | -1.73526   | -0.128682  | 0.55588    | 0.240921  | 1.16959   | 0.654717  | 1.74651  | 1.21802  | 1.83028  | 0.465357 |
| 4 | Pou3f4  | 0 | -0.462494  | -1.2943    | -0.848391  | -0.626746 | -0.334614 | 1.69309   | 1.17025  | 1.09832  | 1.05774  | 0.913335 |
| 4 | Ppl     | 0 | 0.602372   | 2.02132    | 2.58785    | 1.82296   | 1.18231   | 2.26558   | 2.99784  | 2.27542  | 2.87309  | 3.05147  |
| 4 | Ppp1r36 | 0 | -1.14919   | 0.315195   | -0.513276  | 0.305943  | 1.54284   | 1.75791   | 0.859525 | 1.45659  | 2.0272   | 1.05552  |
| 4 | Ppp1r3b | 0 | -0.165879  | 1.22068    | 1.46161    | 1.76915   | 2.39911   | 2.90651   | 2.84525  | 2.00522  | 1.86881  | 1.7189   |
| 4 | Pqlc3   | 0 | -0.200536  | -0.0403518 | 0.0944628  | 0.880031  | 2.23841   | 2.35904   | 2.2292   | 0.992151 | 1.86327  | 0.884619 |
| 4 | Prdm12  | 0 | 1.06082    | 0.0548089  | 0.570303   | 1.26481   | 1.32526   | 1.91386   | 2.60516  | 2.17246  | 2.40922  | 2.86127  |
| 4 | Prdm5   | 0 | -0.375579  | 0.6086     | 1.22331    | 1.31905   | 2.9725    | 2.10707   | 1.67546  | 2.28129  | 1.93102  | 1.007    |
| 4 | Prelp   | 0 | -0.466482  | -0.315147  | -0.616335  | -0.513928 | -0.27319  | 1.11161   | 1.75128  | 1.37784  | 1.83909  | 1.38336  |
| 4 | Prlr    | 0 | 0.804374   | 1.33465    | 1.44325    | 1.66793   | 1.51446   | 2.69632   | 2.64619  | 2.43938  | 3.32289  | 2.87701  |
| 4 | Pros1   | 0 | -0.0363235 | 0.733049   | 1.047      | 2.10645   | 2.63432   | 2.70052   | 2.56843  | 1.47983  | 1.40938  | 0.832208 |
| 4 | Psmb9   | 0 | -0.704302  | 0.112706   | 0.0471214  | 0.52189   | 2.19402   | 1.74217   | 2.39608  | 1.34318  | 1.41429  | 0.687806 |
| 4 | Ptafr   | 0 | 0.0573338  | 0.943849   | 0.104494   | 0.540337  | 1.79155   | 2.1833    | 2.89756  | 1.60022  | 1.88706  | 0.308969 |
| 4 | Ptgdr   | 0 | -1.19601   | 0.677718   | 0.507266   | 1.1411    | 1.48622   | 1.55054   | 2.2644   | 0.977938 | 2.03317  | 1.78063  |
| 4 | Ptger4  | 0 | 0.587548   | 1.46139    | 2.36166    | 1.59786   | 2.13267   | 2.63808   | 3.09896  | 1.91352  | 1.3232   | 0.171212 |
| 4 | Ptgfr   | 0 | -1.32243   | -0.726577  | -0.165457  | 0.365145  | 0.702648  | 1.38417   | 1.31649  | 1.06633  | 1.62264  | 1.68724  |
| 4 | Ptpn22  | 0 | 1.16349    | 0.968717   | 0.647532   | 2.27284   | 1.619     | 1.16002   | 3.19283  | 1.21319  | 3.17792  | 1.12905  |
| 4 | Ptpn6   | 0 | 0.0664107  | -0.27984   | 0.267496   | 0.865072  | 2.05574   | 2.30802   | 2.5199   | 1.44383  | 1.51074  | 0.412758 |
| 4 | Ptprb   | 0 | -0.191949  | 1.24999    | 0.594374   | 0.877532  | 2.25402   | 3.16624   | 2.25923  | 1.30969  | 0.996656 | 1.09111  |
| 4 | Ptprc   | 0 | 0.100378   | 0.185422   | 0.388916   | 1.08219   | 2.11486   | 2.31788   | 2.72482  | 1.5921   | 1.72476  | 0.276725 |
| 4 | Ptrf    | 0 | -0.34861   | 0.773231   | 1.21205    | 1.48378   | 2.49008   | 2.71725   | 2.43911  | 1.44734  | 2.03981  | 1.81625  |
| 4 | Pydc3   | 0 | 0.331483   | 0.0636906  | 0.0147462  | 0.188638  | 1.62242   | 2.00322   | 2.89242  | 0.687081 | 1.89236  | 0.515739 |

|   |            |   |            |           |           |            |           |           |           |            |           |            |
|---|------------|---|------------|-----------|-----------|------------|-----------|-----------|-----------|------------|-----------|------------|
| 4 | Pydc4      | 0 | 0.261926   | 0.601141  | 0.678779  | 0.223999   | 2.28884   | 1.81018   | 2.87843   | -0.0857916 | 1.63798   | 0.600233   |
| 4 | Pygl       | 0 | 0.761837   | 1.0033    | 1.11531   | 0.667905   | 2.94571   | 2.79401   | 3.01077   | 1.79536    | 1.72209   | 1.546      |
| 4 | Pyhin1     | 0 | -0.380937  | 0.223176  | 0.503584  | 1.48946    | 2.04421   | 2.21103   | 2.68535   | 1.46752    | 1.88084   | 0.949232   |
| 4 | Pyroxd2    | 0 | -0.106383  | 0.488921  | -0.514708 | 0.721461   | 1.91418   | 2.53348   | 2.30952   | 1.08822    | 1.42917   | 1.2222     |
| 4 | Rap1b      | 0 | 0.208644   | 1.25401   | 1.4153    | 1.95465    | 1.97376   | 3.00986   | 2.6938    | 1.16729    | 1.10758   | 0.144118   |
| 4 | Rarb       | 0 | -0.897886  | -0.927379 | -1.35951  | -1.76655   | -3.43565  | -0.359632 | -0.126675 | -0.218954  | -0.306886 | -0.595297  |
| 4 | Rasgrp3    | 0 | 0.155247   | 0.659438  | 1.02723   | 0.342863   | 1.83055   | 2.88936   | 2.85483   | 1.40954    | 0.827589  | 0.686721   |
| 4 | Rassf4     | 0 | 0.521371   | 0.303686  | 0.258192  | 1.37658    | 2.12312   | 1.91491   | 3.17593   | 1.61218    | 1.93412   | 0.543916   |
| 4 | Rassf8     | 0 | 0.0233147  | 1.56043   | 1.09253   | 1.85274    | -0.721972 | 1.86408   | 1.96205   | 1.42653    | 2.46491   | 1.69081    |
| 4 | Rassf9     | 0 | -0.712853  | 0.452353  | 0.804476  | 0.915701   | 1.62232   | 2.40682   | 2.20095   | 1.76214    | 2.14474   | 1.7105     |
| 4 | Rbm47      | 0 | 0.376721   | 0.867531  | 0.297281  | 1.56491    | 2.47219   | 2.86507   | 2.79611   | 1.45163    | 1.84533   | 1.22179    |
| 4 | Rcn3       | 0 | 0.0193955  | -0.562998 | -0.650562 | -0.0118796 | 1.50647   | 1.97795   | 2.12128   | 1.30993    | 1.34983   | 0.866055   |
| 4 | Rdh5       | 0 | 1.33059    | 1.05164   | 0.867883  | 1.17147    | 2.67478   | 2.28436   | 2.29872   | 2.58727    | 3.04715   | 2.94504    |
| 4 | Reep3      | 0 | 0.298256   | 1.35651   | 1.29165   | 1.69742    | 1.81816   | 3.01391   | 3.18736   | 1.53624    | 1.09467   | 0.588082   |
| 4 | Retsat     | 0 | -0.102996  | 0.685694  | 0.564459  | 0.336934   | 0.931286  | 2.67951   | 2.77467   | 1.77867    | 1.82611   | 1.04848    |
| 4 | Rftn1      | 0 | -0.0139808 | -0.430003 | -0.344799 | 0.288129   | 1.78949   | 2.21548   | 2.04536   | 1.08032    | 1.79938   | 0.989245   |
| 4 | Rgs22      | 0 | -0.252314  | 0.823187  | 0.21132   | 0.13355    | 0.816046  | 2.18602   | 1.55757   | 2.35486    | 2.38236   | 1.7879     |
| 4 | Rhod       | 0 | 0.775709   | 0.518339  | 1.52966   | 2.52836    | 2.92217   | 2.61838   | 2.9615    | 2.06867    | 1.91146   | 2.12268    |
| 4 | Rilpl2     | 0 | 1.79305    | 1.44676   | 1.96586   | 1.4526     | 2.87709   | 2.12716   | 3.9844    | 1.66044    | 2.6154    | 2.3756     |
| 4 | Rin2       | 0 | 0.964865   | 0.981474  | 0.859001  | -0.0635611 | 2.02604   | 3.2092    | 2.56603   | 0.994388   | 1.19046   | 0.841088   |
| 4 | Ripk2      | 0 | 2.27019    | 2.63384   | 2.58124   | 1.51495    | 2.2742    | 3.32703   | 3.13381   | 0.656047   | 1.90068   | 1.87072    |
| 4 | Rorc       | 0 | 0.848168   | 0.973825  | 0.754381  | 0.582838   | 1.68601   | 2.82993   | 2.52943   | 2.47064    | 2.72005   | 2.18011    |
| 4 | Rp2h       | 0 | -1.08003   | 0.0445071 | -0.180243 | 0.510274   | 0.290768  | 1.66877   | 2.55845   | 1.08067    | 1.05832   | -0.0495261 |
| 4 | Rpl31-ps12 | 0 | 0.443582   | 0.391957  | -1.66336  | -1.72978   | -1.17084  | 0.858583  | 0.741925  | 0.521337   | 0.678692  | 0.710015   |
| 4 | Rps5       | 0 | 0.0609674  | -0.722612 | 0.0132088 | 1.24686    | 1.48729   | 0.944732  | 1.6195    | 1.11014    | 1.90571   | 2.64399    |
| 4 | Rsad2      | 0 | 0.400112   | 0.80193   | 0.821411  | 1.63054    | 2.47106   | 2.49504   | 2.95792   | 0.821243   | 1.55937   | 0.265747   |
| 4 | Rsph1      | 0 | 0.0997665  | -0.313376 | -0.746422 | 0.0208898  | 1.64203   | 1.16343   | 1.54725   | 1.53854    | 2.13291   | 1.75404    |
| 4 | Rsph4a     | 0 | 0.262256   | 0.428769  | 0.465123  | 0.16621    | 0.522925  | 1.64274   | 2.03622   | 1.78542    | 2.03176   | 2.97747    |
| 4 | Rtp4       | 0 | -0.537304  | 0.23395   | 0.671671  | 1.25091    | 2.02888   | 2.3745    | 2.60737   | 0.950813   | 1.34804   | 0.508597   |
| 4 | Rwdd3      | 0 | 0.167536   | -0.815305 | -0.360275 | -0.179674  | -0.145646 | 0.202713  | 0.7597    | 1.08997    | 1.79492   | 2.5319     |
| 4 | S1pr3      | 0 | -0.424594  | -0.143829 | 0.482295  | 1.98552    | 1.74622   | 1.77431   | 2.54929   | 1.56194    | 1.33157   | 0.333661   |
| 4 | Saa3       | 0 | 0          | 1.16031   | 1.59907   | 2.11788    | 2.32492   | 2.46462   | 3.03276   | 2.58072    | 2.16662   | 1.59992    |
| 4 | Samd9l     | 0 | -0.745892  | 0.152475  | -0.138712 | 0.836841   | 0.831076  | 2.01661   | 2.63246   | 1.11355    | 1.6588    | 0.752427   |
| 4 | Sat1       | 0 | 1.09493    | 1.34346   | 1.45312   | 1.72735    | 2.99591   | 3.27298   | 2.9759    | 1.71295    | 1.85281   | 0.818387   |
| 4 | Scara5     | 0 | 0.972191   | 2.18947   | 1.82079   | 2.50943    | 2.05003   | 3.32413   | 3.4982    | 2.0976     | 2.74775   | 1.65984    |
| 4 | Scarb2     | 0 | 0.00114    | 0.898587  | 0.321763  | 0.267208   | 1.04953   | 2.89491   | 2.80502   | 1.39952    | 1.24603   | 1.13204    |
| 4 | Scn9a      | 0 | 0.776027   | 0.108392  | 1.52844   | 1.5879     | 0.231873  | 1.58946   | 2.56724   | 1.75376    | 2.63527   | 2.63155    |
| 4 | Scpep1     | 0 | 0.470057   | 0.369302  | 0.547982  | 1.20205    | 2.28419   | 2.76924   | 2.89828   | 1.30484    | 1.79734   | 0.797516   |

|   |           |   |            |           |            |            |            |            |            |           |           |           |
|---|-----------|---|------------|-----------|------------|------------|------------|------------|------------|-----------|-----------|-----------|
| 4 | Sec14l5   | 0 | -0.594531  | 1.09817   | 2.17449    | 2.49832    | 0.481479   | 1.531      | 2.53494    | 1.67998   | 1.33979   | 1.59167   |
| 4 | Sema3b    | 0 | 0.826361   | 0.381597  | 0.612669   | 0.933967   | 2.17989    | 2.52306    | 2.4908     | 2.14308   | 2.40291   | 2.61915   |
| 4 | Sema3d    | 0 | 0.556393   | 1.55143   | 1.41076    | 2.11947    | 1.61021    | 3.33513    | 3.01374    | 2.15704   | 1.89459   | 0.76537   |
| 4 | Sema4d    | 0 | -0.100746  | 0.195626  | 0.0009621  | -0.104059  | -0.0473919 | 2.11514    | 2.79903    | 1.15127   | 0.871129  | 0.132543  |
| 4 | Sepp1     | 0 | 0.771601   | 0.931351  | 1.17968    | 0.353967   | 1.51905    | 2.60273    | 3.54992    | 1.44799   | 1.81676   | 1.58929   |
| 4 | Serp1     | 0 | -0.369559  | 1.33367   | 1.40526    | 1.70424    | 1.46988    | 2.81433    | 2.877      | 1.34677   | 1.0501    | 0.611818  |
| 4 | Serpina9  | 0 | -1.10335   | -1.78232  | -1.91394   | -2.77529   | -2.45226   | -0.635233  | -0.192645  | -0.356762 | -0.700352 | 0.0312277 |
| 4 | Serpinb1a | 0 | -0.858914  | 0.0230225 | 0.73169    | -0.181719  | 0.490995   | 0.748701   | 1.88704    | 1.71709   | 1.88961   | 2.11638   |
| 4 | Serpinb6a | 0 | 0.185712   | 0.531971  | 1.03845    | 1.16375    | 2.37046    | 2.97992    | 2.63839    | 1.5726    | 2.19799   | 1.27589   |
| 4 | Serpinb6b | 0 | 0.119807   | 0.50244   | 0.942098   | 0.523104   | 2.37599    | 2.71809    | 2.36369    | 1.53514   | 2.08109   | 0.512984  |
| 4 | Serpinb9  | 0 | -1.10864   | 0.0173296 | -0.0195896 | 0.633201   | 1.81978    | 1.84399    | 1.93557    | 1.05241   | 1.72194   | 1.07291   |
| 4 | Serpind1  | 0 | 0.042464   | 0.43502   | 0.132898   | 0.889565   | 1.1952     | 2.34655    | 2.96669    | 1.67913   | 2.0606    | 1.15979   |
| 4 | Serpine2  | 0 | 0.912014   | 1.08791   | 1.17252    | 0.560287   | 2.14217    | 3.32155    | 2.98377    | 1.54946   | 1.38765   | 2.08471   |
| 4 | Serpinf2  | 0 | 0.676467   | 1.46632   | 2.44368    | 3.17179    | 0.792827   | 2.48061    | 2.94518    | 2.22849   | 2.1277    | 1.6804    |
| 4 | Serping1  | 0 | -0.199219  | 0.0584434 | 0.188861   | 0.979529   | 1.2871     | 1.98215    | 2.77513    | 1.83805   | 2.07652   | 0.852719  |
| 4 | Sfrp4     | 0 | 0.282032   | 1.62484   | 1.26667    | 0.674523   | 0.733501   | 0.212098   | 3.01422    | 0.960476  | 2.84102   | 0.961241  |
| 4 | Sgpl1     | 0 | -0.0187947 | 0.481738  | 0.524226   | 1.19053    | 1.85345    | 2.78961    | 2.87335    | 1.12885   | 1.25897   | 0.596584  |
| 4 | Sh3pxd2b  | 0 | 0.089835   | 0.391678  | 0.0893291  | 1.68583    | 1.20591    | 1.88853    | 2.79688    | 0.543924  | 1.14173   | -0.577859 |
| 4 | Shroom3   | 0 | 0.992904   | 1.18439   | 2.14692    | 0.997185   | 2.04626    | 3.2788     | 3.28967    | 1.30845   | 1.89483   | 2.30872   |
| 4 | Siglec1   | 0 | 0.0238619  | -0.412529 | -0.083313  | 0.862906   | 1.72422    | 2.42206    | 2.31243    | 1.11049   | 1.58415   | 0.422062  |
| 4 | Siglecf   | 0 | -0.0852901 | -0.203319 | 0.192985   | -0.07046   | 1.20805    | 1.46206    | 2.6948     | 1.9829    | 0.904425  | -0.152023 |
| 4 | Sirt2     | 0 | -0.0683594 | -0.286738 | 0.355629   | 0.54297    | 0.484722   | 2.63193    | 1.47383    | 0.0047241 | -0.354404 | -1.1194   |
| 4 | Six3os1   | 0 | -0.0571063 | -0.365283 | -0.380769  | -0.0302613 | 1.13548    | 1.39989    | 1.13568    | 0.98976   | 0.901035  | 2.95986   |
| 4 | Six4      | 0 | 0.753795   | 0.693076  | 1.91011    | 0.133449   | -2.24839   | 0.307662   | -0.0974754 | -0.199356 | 0.114584  | 0.671349  |
| 4 | Skap2     | 0 | -0.22265   | 0.0555746 | 0.393686   | 1.55785    | 2.05662    | 2.47571    | 2.6173     | 1.1542    | 1.33442   | 0.825252  |
| 4 | Slamf6    | 0 | -1.10409   | -0.294809 | 0.228361   | 0.450669   | 1.64875    | 1.78215    | 1.92678    | 1.39838   | 1.27551   | -0.078271 |
| 4 | Slamf7    | 0 | -0.429291  | 0.440885  | 0.592693   | 1.02971    | 2.10542    | 1.72973    | 2.51669    | 1.84904   | 2.48788   | 1.05745   |
| 4 | Slc10a4   | 0 | 1.28045    | 1.19593   | -0.774272  | 1.08405    | 0.5684     | 2.1427     | 1.99662    | 2.13557   | 1.87472   | 2.39764   |
| 4 | Slc11a1   | 0 | 0.0493417  | 0.59859   | 1.11121    | 1.73123    | 2.60756    | 2.24238    | 2.86827    | 1.85835   | 1.82948   | 0.585871  |
| 4 | Slc12a7   | 0 | -0.349005  | 0.120981  | 0.284268   | 1.41377    | 2.04657    | 2.5262     | 2.29028    | 1.40819   | 1.84833   | 1.12592   |
| 4 | Slc13a4   | 0 | -0.476488  | 0.226972  | -0.0408351 | 0.361442   | -0.235745  | 1.63965    | 2.28867    | 1.45677   | 2.03848   | 1.53742   |
| 4 | Slc15a3   | 0 | 0.0892536  | 1.22407   | 1.38607    | 2.05357    | 2.52148    | 2.62939    | 2.76626    | 1.55389   | 1.81528   | 0.342042  |
| 4 | Slc16a1   | 0 | 0.0898239  | 1.11092   | 1.15045    | 1.9738     | 1.0251     | 2.24424    | 3.25952    | 2.32415   | 2.35617   | 1.48452   |
| 4 | Slc16a12  | 0 | -0.691162  | 1.97068   | 0.642831   | 1.08178    | 1.2644     | 2.97376    | 1.92516    | 1.64369   | 1.50425   | 1.57851   |
| 4 | Slc16a9   | 0 | -0.400613  | 1.12549   | 0.984201   | 1.68263    | 2.90366    | 2.45853    | 1.98347    | 1.24198   | 2.0843    | 0.876816  |
| 4 | Slc1a5    | 0 | -0.855822  | 0.657417  | 0.749671   | 1.96925    | 2.02455    | 2.31611    | 2.16728    | 1.21173   | 0.876019  | 0.485444  |
| 4 | Slc22a6   | 0 | -1.12127   | -1.61089  | -2.22962   | -1.50845   | -0.44195   | -0.0065621 | 0.543689   | 0.118007  | 0.629859  | 0.569838  |
| 4 | Slc26a7   | 0 | -1.11199   | 0.270903  | -0.852994  | -0.237138  | -0.629523  | 0.792055   | 1.49115    | 1.02374   | 1.82499   | 1.27481   |

|   |          |   |            |            |           |            |            |           |           |           |           |           |
|---|----------|---|------------|------------|-----------|------------|------------|-----------|-----------|-----------|-----------|-----------|
| 4 | Slc29a3  | 0 | -0.161152  | -0.0924774 | 0.294156  | 0.639804   | 1.38644    | 2.28698   | 2.95311   | 1.15064   | 0.961677  | 0.450464  |
| 4 | Slc2a10  | 0 | -0.795514  | 0.28115    | -1.36131  | 1.48539    | 1.04432    | 1.42802   | 1.94663   | 0.287875  | 1.04967   | 0.467761  |
| 4 | Slc2a12  | 0 | -0.15033   | 0.327416   | 1.20114   | 0.194172   | 0.533718   | 2.70791   | 1.79341   | 2.01642   | 1.9544    | 2.03053   |
| 4 | Slc2a4   | 0 | -0.13551   | -0.969625  | 0.145039  | -0.954457  | 0.847302   | 1.49707   | 2.13054   | 1.07396   | 1.3667    | 0.816281  |
| 4 | Slc2a9   | 0 | 0.177498   | 1.00716    | 1.47124   | -0.0064053 | 2.52736    | 2.66168   | 2.58322   | 0.845287  | 1.07715   | 1.14322   |
| 4 | Slc35d3  | 0 | -0.468132  | -1.05983   | -2.00859  | -1.83161   | -3.14931   | -0.469138 | -0.393234 | -0.359547 | -0.583487 | 0.0982576 |
| 4 | Slc37a2  | 0 | 0.489269   | 0.763076   | 0.927365  | 1.4293     | 2.41395    | 2.9776    | 3.09848   | 1.64786   | 1.89108   | 1.16495   |
| 4 | Slc40a1  | 0 | -0.896231  | 0.188287   | 0.945019  | -0.945619  | 0.988676   | 1.59758   | 2.40122   | 1.04722   | 0.891513  | 0.863109  |
| 4 | Slc43a3  | 0 | 0.903605   | 1.33595    | 1.30685   | 1.74357    | 2.91503    | 3.05023   | 2.99816   | 2.39285   | 1.98351   | 0.863959  |
| 4 | Slc44a1  | 0 | 0.630312   | 1.17568    | 1.15436   | 1.73144    | 2.44274    | 3.20974   | 3.16865   | 1.89051   | 1.50422   | 1.08783   |
| 4 | Slc46a3  | 0 | -0.0447678 | 0.509166   | 2.00084   | 1.02468    | 1.88055    | 2.93017   | 2.59212   | 1.15334   | 1.25832   | 0.497221  |
| 4 | Slc47a1  | 0 | -1.46846   | -0.942763  | -1.49922  | -0.972633  | -0.0049975 | 0.333545  | 1.15225   | 0.67329   | 1.29314   | 0.522095  |
| 4 | Slc4a5   | 0 | 0.976947   | 1.56683    | 2.05417   | 1.93933    | 1.55979    | 3.12963   | 2.6101    | 2.80202   | 3.10746   | 3.05126   |
| 4 | Slc5a7   | 0 | -0.0651196 | -0.58459   | -0.549912 | 0.25881    | -1.52411   | 1.18475   | 1.53138   | 1.42852   | 0.815391  | 1.36441   |
| 4 | Slc6a13  | 0 | 0.109463   | 0.135363   | -0.181406 | -0.0369079 | 0.893585   | 2.12958   | 2.00961   | 1.6075    | 2.32075   | 1.75783   |
| 4 | Slc6a20a | 0 | 0.282105   | 0.084714   | -0.379356 | 0.549975   | -0.0634598 | 2.2012    | 2.1978    | 1.65216   | 1.85506   | 1.6765    |
| 4 | Slc7a11  | 0 | -0.746739  | 0.689166   | 0.948483  | 2.09597    | 0.584297   | 1.32061   | 2.73803   | 1.56824   | 2.06542   | 1.36953   |
| 4 | Slc7a2   | 0 | -0.177294  | 1.15202    | 1.29639   | 0.651695   | -0.632755  | 1.96449   | 2.75726   | 1.37856   | 1.7202    | 0.809734  |
| 4 | Slc8b1   | 0 | 0.484243   | 0.876647   | 1.25418   | 1.4638     | 2.97644    | 3.00038   | 2.5734    | 1.59586   | 2.41011   | 2.01852   |
| 4 | Slc9a2   | 0 | -1.18089   | -0.877079  | -2.05262  | -1.96607   | -1.86339   | 0.0692669 | 0.263803  | 0.0641198 | 0.570321  | 0.206904  |
| 4 | Slc9a9   | 0 | 0.205163   | 0.0255847  | -0.398067 | -0.089242  | 0.812246   | 1.75164   | 2.93252   | 1.54418   | 1.01852   | 1.15737   |
| 4 | Slnf1    | 0 | 0.190444   | 0.326368   | 0.614866  | 1.51445    | 2.62906    | 1.87028   | 2.90006   | 1.34381   | 2.16404   | 0.835334  |
| 4 | Slnf2    | 0 | 0.0615198  | 0.330644   | 0.730729  | 1.47551    | 2.10673    | 2.20445   | 2.98169   | 1.22173   | 1.90138   | 0.35347   |
| 4 | Slnf4    | 0 | 0.782919   | 0.252173   | 0.366904  | 1.63524    | 1.78619    | 1.65352   | 3.20615   | 1.08085   | 2.02418   | 0.0383321 |
| 4 | Slnf8    | 0 | 0.0087941  | 0.269639   | 0.8285    | 1.56383    | 2.49478    | 2.35654   | 2.7923    | 1.3961    | 1.83954   | 0.832271  |
| 4 | Smco3    | 0 | 0.500889   | 1.63664    | 1.58463   | 0.397439   | -1.36366   | 1.23707   | 1.15435   | 1.54866   | 1.66376   | 2.12102   |
| 4 | Smo      | 0 | 0.145926   | 0.0368263  | -0.376265 | 0.732017   | 2.0006     | 2.21809   | 2.17936   | 1.09435   | 2.09217   | 1.58762   |
| 4 | Smoc1    | 0 | 0.560672   | -0.0982776 | 0.558862  | 0.765357   | 2.54508    | 1.8382    | 2.44171   | 1.85396   | 2.52911   | 1.18388   |
| 4 | Snap23   | 0 | 0.213791   | 0.675177   | 0.93531   | 1.56056    | 1.52248    | 2.87868   | 2.99201   | 0.976601  | 0.985744  | 0.258472  |
| 4 | Sned1    | 0 | -0.909657  | -0.0603208 | -0.482081 | -0.0067108 | -0.219442  | 1.00606   | 2.68843   | 0.502872  | 1.33188   | 0.724552  |
| 4 | Snx33    | 0 | 0.872946   | 1.18706    | 1.36356   | 1.11849    | 1.3404     | 3.49149   | 3.23094   | 1.79383   | 1.67745   | 1.26766   |
| 4 | Snx5     | 0 | 0.108263   | 0.855603   | 0.76344   | 0.487017   | 1.79809    | 2.68915   | 3.05762   | 1.71864   | 1.74562   | 0.978441  |
| 4 | Snx9     | 0 | -0.137927  | 0.577238   | 0.0199881 | 0.695277   | 1.42431    | 2.38906   | 3.03339   | 1.42907   | 1.29441   | 1.18084   |
| 4 | Soat1    | 0 | -0.21683   | 0.443361   | 0.259062  | 0.535398   | 1.51822    | 2.51004   | 2.81701   | 1.26039   | 1.3975    | 0.392431  |
| 4 | Socs4    | 0 | 0.578738   | 1.91466    | 1.85544   | 2.81444    | 0.0760267  | 2.09805   | 2.62283   | 2.38969   | 2.34853   | 1.75134   |
| 4 | Socs6    | 0 | 0.158      | 1.32069    | 2.05731   | 1.90711    | 1.44717    | 3.39713   | 2.64594   | 1.1183    | 2.14735   | 1.28092   |
| 4 | Sod3     | 0 | -0.638396  | 0.234608   | -1.09004  | -0.622789  | 1.25408    | 1.88629   | 1.78706   | 1.02679   | 0.90598   | 0.589337  |
| 4 | Sostdc1  | 0 | 1.14293    | 0.187613   | 0.539361  | 0.189321   | 2.00297    | 2.05525   | 1.78468   | 2.35519   | 2.46789   | 2.54259   |

|   |         |   |            |            |            |            |           |           |            |            |           |          |
|---|---------|---|------------|------------|------------|------------|-----------|-----------|------------|------------|-----------|----------|
| 4 | Sowahc  | 0 | 0.543789   | 1.53271    | 1.78176    | 1.363      | 1.7139    | 3.23123   | 3.39823    | 2.12001    | 2.20001   | 1.55882  |
| 4 | Sox10   | 0 | -0.581752  | -0.989215  | 0.370848   | 1.08325    | 1.73924   | 2.10226   | 1.41533    | 1.39893    | 1.15567   | 1.54904  |
| 4 | Sox21   | 0 | -1.79231   | -1.17428   | 0.674005   | -0.151779  | -0.601927 | 0.731444  | 0.220647   | 1.08359    | 1.13791   | 1.30491  |
| 4 | Sp100   | 0 | -0.358876  | -0.553386  | -0.342118  | 0.571847   | 1.56011   | 1.8455    | 2.39098    | 1.06523    | 1.34791   | 0.199113 |
| 4 | Sp140   | 0 | 0.174126   | 0.320681   | 0.261244   | 0.86607    | 2.45201   | 2.34956   | 2.76265    | 1.61408    | 1.71119   | 1.18379  |
| 4 | Spag16  | 0 | 0.463674   | 1.05515    | 1.02104    | 0.865567   | 0.760118  | 2.27951   | 2.01321    | 2.60641    | 3.00912   | 2.46245  |
| 4 | Spata13 | 0 | -0.229278  | 0.700023   | 0.943524   | 0.879783   | 1.83899   | 2.64449   | 3.07846    | 1.28962    | 1.2002    | 0.939243 |
| 4 | Spata17 | 0 | 1.6582     | 0.779055   | 2.06264    | 1.3525     | 2.18472   | 3.2317    | 1.60865    | 2.27087    | 3.25671   | 2.81686  |
| 4 | Spata18 | 0 | 0.258375   | 0.616233   | -0.105299  | 0.22468    | 0.71482   | 2.33348   | 2.01061    | 1.48126    | 2.57247   | 2.00341  |
| 4 | Spata6  | 0 | 1.3999     | 1.25561    | 1.25895    | 2.00696    | 3.28161   | 3.2031    | 3.02448    | 2.08864    | 2.62472   | 1.98133  |
| 4 | Spef2   | 0 | 0.651588   | 0.570551   | 0.0661182  | 0.304716   | 2.13815   | 2.3309    | 2.08068    | 2.06197    | 2.56143   | 1.85429  |
| 4 | Spint1  | 0 | -0.3558    | 0.196472   | 0.673904   | 1.6891     | 2.28681   | 2.34952   | 2.64808    | 1.22357    | 1.20061   | 1.05386  |
| 4 | Spn     | 0 | -0.792485  | 0.417818   | 1.24042    | 1.21149    | 2.1242    | 1.55831   | 2.42323    | 1.84905    | 2.20079   | 0.926319 |
| 4 | Sqrdl   | 0 | 0.0039129  | -0.187584  | 0.179455   | 0.248457   | 2.19865   | 2.14719   | 2.3598     | 1.45259    | 1.72968   | 0.857909 |
| 4 | Srebf1  | 0 | -0.300976  | -0.615284  | -0.785673  | 0.236082   | 1.30729   | 1.60902   | 2.10095    | 1.25746    | 1.61344   | 0.949975 |
| 4 | Sstr4   | 0 | -0.668608  | -0.946546  | -0.938117  | -0.953373  | -3.87161  | -0.62743  | -0.576822  | -0.640293  | -0.577475 | -1.1013  |
| 4 | St14    | 0 | 0.274011   | 0.644681   | 1.09738    | 1.20451    | 2.47211   | 2.38431   | 3.06794    | 1.67001    | 1.09778   | 0.338255 |
| 4 | St8sia6 | 0 | 1.76724    | 2.65181    | 2.51624    | 2.10931    | 1.13039   | 2.42932   | 3.25207    | 3.50354    | 2.8971    | 1.78285  |
| 4 | Stap1   | 0 | 0          | 1.21956    | 1.45947    | 1.67905    | 2.03633   | 2.23696   | 2.55829    | 2.38385    | 3.22459   | 1.75274  |
| 4 | Stard6  | 0 | 0.815305   | 1.07463    | 1.33326    | 1.53389    | 1.70084   | 2.02869   | 1.69949    | 2.40692    | 2.06285   | -1.01284 |
| 4 | Stat1   | 0 | -0.0321456 | 0.061297   | 0.282867   | 1.00197    | 1.62472   | 2.4825    | 2.93278    | 0.89218    | 0.996799  | 0.543928 |
| 4 | Steap4  | 0 | 0.697375   | 1.50929    | 1.7073     | 2.60475    | 1.63417   | 1.47307   | 3.23335    | 2.94458    | 2.87091   | 1.39465  |
| 4 | Stk10   | 0 | -0.389633  | 0.0012652  | 0.04798    | 0.382031   | 1.46968   | 2.3453    | 2.67039    | 0.924713   | 1.04251   | 0.402164 |
| 4 | Stk17b  | 0 | 0.780442   | 1.44602    | 1.57562    | 1.55208    | 0.961975  | 2.95525   | 3.61118    | 1.44515    | 2.03204   | 1.10591  |
| 4 | Stk33   | 0 | -0.295912  | 0.0315649  | -0.0008048 | 1.15198    | 1.57748   | 0.469317  | 1.09617    | 1.59078    | 2.60889   | 2.34629  |
| 4 | Stom    | 0 | -0.262867  | 1.05616    | 0.646576   | 1.25618    | 2.58795   | 2.68363   | 2.4639     | 1.38625    | 1.76029   | 0.817615 |
| 4 | Ston1   | 0 | -0.0115381 | 0.641711   | 0.981798   | 2.28071    | 0.352735  | 3.20626   | 1.62665    | 0.886962   | 1.33964   | 0.338099 |
| 4 | Stxbp3  | 0 | 1.09347    | 2.00585    | 3.73139    | 2.33721    | 1.28577   | 2.80046   | 2.88392    | 2.06667    | 2.38382   | 1.9203   |
| 4 | Sulf1   | 0 | 0.459651   | 0.501789   | 0.845733   | 1.8799     | 1.25567   | 2.56834   | 3.21503    | 2.06628    | 2.29673   | 1.55372  |
| 4 | Sulf2   | 0 | 0.169002   | -0.0166656 | 0.593131   | 1.39707    | 0.736967  | 2.47514   | 2.8446     | 1.07986    | 0.719381  | -0.15847 |
| 4 | Svep1   | 0 | -0.567159  | 0.0417174  | -0.742737  | -0.503465  | -1.20958  | 1.45471   | 2.00572    | 0.686976   | 1.07472   | 0.622709 |
| 4 | Svil    | 0 | 0.522326   | 0.9532     | 1.24274    | 0.977233   | 1.76132   | 3.1532    | 3.31694    | 1.5588     | 1.57047   | 1.28325  |
| 4 | Syne2   | 0 | 0.221746   | 1.29095    | 1.36025    | 1.05107    | 1.81615   | 2.96078   | 3.01636    | 2.33316    | 2.39367   | 1.83737  |
| 4 | Sytl4   | 0 | 0.759775   | 1.08869    | 1.81433    | 1.95555    | 2.01517   | 0.908728  | 2.19764    | 1.95024    | 3.41986   | 3.04119  |
| 4 | T2      | 0 | 0.364445   | 0.629729   | 0.80977    | 0.622908   | 2.15468   | 1.88303   | 2.40451    | 1.03886    | 2.74912   | 2.68836  |
| 4 | Tac1    | 0 | -0.489358  | -0.55221   | -0.740267  | -1.37502   | -3.0254   | -0.397336 | -0.0120096 | -0.0832653 | 0.388454  | 0.655852 |
| 4 | Tagap   | 0 | -0.619024  | -0.592295  | -0.967854  | -0.837479  | -0.58524  | 1.36011   | 1.88175    | 0.0245345  | -0.127691 | -1.49164 |
| 4 | Tbc1d2b | 0 | -0.911244  | -0.121272  | -0.455317  | -0.0960275 | -0.765139 | 1.54421   | 2.4038     | 0.37123    | 0.947472  | 0.372347 |

|   |           |   |            |            |            |           |           |          |            |          |            |            |
|---|-----------|---|------------|------------|------------|-----------|-----------|----------|------------|----------|------------|------------|
| 4 | Tbx15     | 0 | -1.13582   | 0.457733   | -0.111741  | 0.0558114 | 0.631796  | 1.9589   | 2.11004    | 0.936336 | 1.7685     | 0.150479   |
| 4 | Tbx18     | 0 | -0.135265  | 0.19408    | -0.0349771 | 0.179686  | 2.19504   | 2.07235  | 2.44612    | 1.14247  | 1.7515     | 0.71006    |
| 4 | Tcf15     | 0 | -0.0941918 | 0.0681303  | -0.12052   | 1.83178   | -2.35747  | 0.434466 | -0.0274086 | 0.596015 | -0.0539711 | -0.727812  |
| 4 | Tec       | 0 | 0.570451   | 1.19611    | 1.23731    | 1.06196   | 2.59463   | 3.0009   | 2.98841    | 1.75702  | 2.25919    | 0.923823   |
| 4 | Tek       | 0 | -0.97757   | -1.56636   | -1.32848   | 0.215084  | 0.306011  | 1.5696   | 1.20389    | 0.698435 | 0.552971   | 0.232842   |
| 4 | Tfap2b    | 0 | 0.674453   | 0.341035   | 0.664657   | 1.33592   | 2.25562   | 2.58335  | 2.48371    | 1.92158  | 2.95412    | 1.5486     |
| 4 | Tfpi      | 0 | 0.148229   | 0.414048   | 0.486273   | 1.35727   | 2.33387   | 2.63892  | 2.69139    | 1.95483  | 1.90503    | 1.22027    |
| 4 | Tgfb1     | 0 | -0.60827   | -0.0116272 | 0.15141    | 0.0987394 | 1.19871   | 2.04758  | 2.67618    | 1.22828  | 0.790884   | 0.0897783  |
| 4 | Tgfb2     | 0 | -0.307481  | 0.437381   | 0.619368   | 0.987321  | 1.72037   | 2.77463  | 2.74407    | 1.36312  | 1.29694    | 0.735709   |
| 4 | Tgif2     | 0 | -0.658452  | 0.235181   | 1.21617    | 1.87487   | 2.08909   | 2.63566  | 1.76726    | 0.778144 | 1.70616    | 1.5348     |
| 4 | Tgtp1     | 0 | 0.758991   | 2.14594    | 1.62596    | 2.08289   | 2.54915   | 2.43042  | 3.17401    | 0.946209 | 2.85896    | 2.78483    |
| 4 | Tgtp2     | 0 | -1.30116   | -1.20774   | 0.245028   | -1.14783  | 0.408472  | 0.781452 | 1.69492    | 0.881562 | 1.08228    | 0.437625   |
| 4 | Thbs2     | 0 | -0.741667  | 0.0206693  | 0.001456   | 1.05188   | 1.33612   | 2.0055   | 2.27606    | 1.3309   | 2.07942    | 0.781618   |
| 4 | Thbs4     | 0 | 0.0703683  | 0.716125   | 0.680534   | 0.409903  | 0.214979  | 2.44464  | 2.60089    | 2.03714  | 2.04486    | 1.71538    |
| 4 | Ticam2    | 0 | -0.0477244 | 0.0797236  | 0.674035   | 1.05929   | 2.50504   | 2.46279  | 2.53416    | 1.26778  | 1.70933    | 0.867311   |
| 4 | Tifa      | 0 | 1.21192    | 1.66822    | 1.78423    | 1.26021   | 2.54646   | 3.27252  | 3.59195    | 1.52273  | 1.95729    | 1.49841    |
| 4 | Tlr1      | 0 | 0.986542   | 1.16636    | 1.83377    | 2.60752   | 2.9836    | 2.88479  | 3.25032    | 2.36095  | 2.44299    | 1.50894    |
| 4 | Tlr13     | 0 | 0.211656   | 0.778241   | 0.680517   | 1.62115   | 2.32459   | 2.69966  | 2.52168    | 1.1301   | 1.41386    | -0.0836693 |
| 4 | Tlr2      | 0 | 0.40868    | 0.242847   | 0.863634   | 1.7308    | 2.23637   | 2.43153  | 2.79625    | 1.70216  | 1.44886    | 0.0946217  |
| 4 | Tlr3      | 0 | -0.213592  | 0.344596   | 0.184942   | 0.372471  | 0.571274  | 2.31174  | 2.74248    | 1.81135  | 1.66574    | 1.02209    |
| 4 | Tlr4      | 0 | 0.763792   | 1.8017     | 1.44454    | 2.30434   | 2.50421   | 3.05187  | 3.27702    | 2.14359  | 2.5265     | 1.07627    |
| 4 | Tlr6      | 0 | -0.147846  | 1.12939    | 1.05526    | 1.32745   | 2.66012   | 2.43431  | 2.82016    | 1.45745  | 1.58672    | 0.527313   |
| 4 | Tlr8      | 0 | -0.137664  | 0.660568   | 0.617209   | 1.09964   | 1.57391   | 2.54941  | 2.87024    | 1.59559  | 2.23499    | 0.766469   |
| 4 | Tlr9      | 0 | -0.235099  | 0.746175   | 0.212181   | 0.19905   | 1.50102   | 2.21802  | 2.87241    | 1.44932  | 1.18371    | 0.153686   |
| 4 | Tmem123   | 0 | 0.54715    | 0.61832    | 0.980312   | 1.85209   | 2.27478   | 2.64301  | 3.28967    | 1.98093  | 2.21369    | 1.5059     |
| 4 | Tmem154   | 0 | 0.481269   | 0.820932   | 1.525      | 1.24431   | 2.32725   | 3.07488  | 2.90718    | 1.88258  | 2.21964    | 0.838608   |
| 4 | Tmem220   | 0 | -0.141     | 0.720185   | 0.862435   | 0.406451  | 2.61306   | 2.35861  | 2.14037    | 1.38007  | 2.13576    | 2.11181    |
| 4 | Tmem232   | 0 | 0.945406   | -1.12162   | 1.19777    | 0.103126  | 0.0497066 | 0.665063 | 0.854438   | 1.01955  | 2.92698    | 0.848278   |
| 4 | Tmem45a   | 0 | 0.669173   | 1.58471    | 1.28349    | 2.32908   | 2.05332   | 3.26482  | 2.15611    | 1.95991  | 3.36507    | 1.50206    |
| 4 | Tmem72    | 0 | 1.69509    | 1.6663     | 2.32451    | 2.02072   | 2.22796   | 3.46727  | 2.54185    | 2.63783  | 3.40213    | 3.35309    |
| 4 | Tnfaip2   | 0 | 1.05473    | 0.784101   | 1.51353    | 2.19789   | 2.58418   | 2.63499  | 3.37921    | 2.29221  | 2.73027    | 1.50347    |
| 4 | Tnfaip3   | 0 | 1.25459    | 1.50389    | 3.06651    | 1.7941    | 0.826107  | 1.96786  | 2.92826    | 1.6846   | 1.74301    | -0.032421  |
| 4 | Tnfrsf11a | 0 | -0.1409    | 0.84355    | 0.85757    | 1.08594   | 1.79137   | 2.6005   | 2.4597     | 0.452862 | 0.412066   | -0.329492  |
| 4 | Tnfrsf11b | 0 | -0.576697  | 0.22724    | 0.360808   | 0.930247  | -0.651325 | 1.44023  | 1.8979     | 1.1387   | 2.57007    | 0.69686    |
| 4 | Tnfsf10   | 0 | -1.84016   | -0.575605  | 0.0240901  | -0.163813 | 0.766131  | 1.24109  | 1.97447    | 0.814744 | 0.619327   | 0.280574   |
| 4 | Tnni1     | 0 | 1.52987    | 0.241371   | 0.0482453  | 2.76749   | 1.48126   | 2.72321  | 2.21836    | 1.37756  | 2.11965    | 1.71507    |
| 4 | Tns3      | 0 | 1.05382    | 1.81952    | 1.93574    | 1.45426   | 1.70835   | 3.48723  | 3.42572    | 1.73219  | 1.68828    | 1.04635    |
| 4 | Tnxb      | 0 | -0.563808  | -0.901371  | -0.170225  | 0.646709  | 0.986644  | 1.43151  | 2.39669    | 1.45655  | 1.35652    | 0.329181   |



|   |          |   |            |            |            |           |            |           |          |            |           |           |
|---|----------|---|------------|------------|------------|-----------|------------|-----------|----------|------------|-----------|-----------|
| 4 | Tor3a    | 0 | -0.124013  | 0.0712898  | 0.50538    | 0.787485  | 1.89001    | 2.32181   | 2.92281  | 1.26128    | 1.48785   | 0.682679  |
| 4 | Traf1    | 0 | 0.779364   | -0.304703  | 0.366139   | 1.10105   | 1.77354    | 1.40275   | 2.4232   | 1.55972    | 2.17341   | -0.538564 |
| 4 | Trem2    | 0 | -0.204659  | -0.208833  | -0.227768  | 0.21925   | 1.81779    | 2.12859   | 2.28963  | 1.49949    | 1.42519   | 0.552846  |
| 4 | Trem12   | 0 | -0.899307  | 0.582642   | 0.617299   | 1.10351   | 2.17072    | 2.05858   | 2.41403  | 1.35167    | 1.53946   | 0.575784  |
| 4 | Trib2    | 0 | -3.59471   | -2.23027   | -1.8722    | -2.08616  | -2.89728   | -2.06984  | -2.34338 | -0.806348  | -1.19566  | -1.19654  |
| 4 | Trim12a  | 0 | 0.0783207  | 0.296154   | 0.720094   | 0.856348  | 2.24718    | 2.44942   | 2.80898  | 1.71811    | 2.06714   | 1.48622   |
| 4 | Trim21   | 0 | -0.368672  | 0.324954   | 0.359648   | 1.2856    | 1.5187     | 2.51861   | 2.76771  | 1.33663    | 1.75358   | 0.993279  |
| 4 | Trim25   | 0 | 0.617494   | 1.23735    | 1.09835    | 2.1011    | 2.87144    | 2.7006    | 3.27968  | 1.35619    | 1.75728   | 1.22022   |
| 4 | Trim30a  | 0 | -0.0631868 | 0.43371    | 0.784098   | 1.37381   | 2.3552     | 2.50013   | 2.89165  | 1.28943    | 1.5222    | 0.74019   |
| 4 | Trim30d  | 0 | 0.0478596  | -0.0269431 | 0.283527   | 1.03655   | 1.96996    | 2.38489   | 2.80572  | 1.32253    | 1.66054   | 0.842981  |
| 4 | Trim34a  | 0 | 0.0473573  | 0.399911   | 0.791365   | 0.744191  | 1.99738    | 2.57444   | 2.97613  | 1.42486    | 1.92867   | 1.096     |
| 4 | Trim59   | 0 | -1.08506   | 0.296845   | 1.56532    | -0.554562 | 0.782262   | 1.52206   | 1.89081  | 1.43812    | 1.67181   | 1.3041    |
| 4 | Trim68   | 0 | -0.642257  | 0.402332   | -0.536398  | -0.143369 | 0.295522   | 1.39043   | 2.5979   | -0.0145299 | 1.69231   | 0.336179  |
| 4 | Trp5inp1 | 0 | 1.889      | 3.57157    | 1.6241     | 2.93868   | 1.30765    | 2.54694   | 3.15388  | 1.43306    | 1.74283   | 1.97095   |
| 4 | Trpv4    | 0 | 1.01144    | 0.514657   | 0.403434   | 2.88688   | 2.12294    | 2.47062   | 2.80574  | 1.53713    | 2.01076   | 1.13704   |
| 4 | Tshr     | 0 | -0.891947  | 0.107918   | -1.25397   | 0.708738  | 1.33275    | 1.36105   | 1.89643  | 1.33304    | 1.14367   | 0.905472  |
| 4 | Tsnaxip1 | 0 | 0.58896    | 0.60826    | 0.415924   | 0.213788  | 1.20975    | 2.10929   | 1.81157  | 2.28904    | 3.07201   | 1.86801   |
| 4 | Tspan18  | 0 | 0.803035   | 0.816671   | 0.488147   | -0.470978 | 1.96729    | 1.23786   | 1.73382  | 1.67618    | 3.11918   | 1.61886   |
| 4 | Ttc12    | 0 | 0.454595   | 0.796053   | 0.498696   | 1.13948   | 2.57682    | 3.15328   | 2.18075  | 1.88061    | 2.19473   | 1.71425   |
| 4 | Ttc21a   | 0 | 0.397757   | 0.0076896  | 0.425035   | 0.972804  | 0.43581    | 2.26322   | 2.34146  | 2.34868    | 2.28136   | 1.78027   |
| 4 | Ttr      | 0 | 1.34062    | 1.21642    | 1.92551    | 2.05236   | 3.11723    | 3.08821   | 2.29485  | 2.65678    | 3.02006   | 3.12127   |
| 4 | Tuft1    | 0 | 2.17024    | 1.80854    | 0.78412    | 2.21017   | -0.425446  | 2.14556   | 2.74008  | 2.01781    | 2.03102   | 1.54621   |
| 4 | Txlnb    | 0 | 0.252519   | 0.38483    | -0.255451  | -0.859497 | 0.458654   | 0.865667  | 1.3751   | 1.29275    | 1.90461   | 2.57875   |
| 4 | Txnip    | 0 | 3.04083    | 2.91774    | 1.8505     | 1.82515   | 2.27519    | 3.30836   | 3.82555  | 2.212      | 2.24774   | 2.19421   |
| 4 | Uaca     | 0 | 0.712317   | 1.72892    | 1.50012    | 1.60815   | 3.04799    | 3.37483   | 2.67739  | 1.26139    | 2.07151   | 1.24926   |
| 4 | Ucma     | 0 | -1.14786   | 0.0753867  | -0.533684  | -1.04498  | -0.809343  | 0.0564911 | 0.880243 | 1.1086     | 1.87604   | 1.16572   |
| 4 | Ugt1a6b  | 0 | 0.756969   | 0.356773   | 0.931792   | 1.18608   | 1.34177    | 3.48916   | 2.44371  | 2.141      | 1.57416   | 1.93742   |
| 4 | Unc93b1  | 0 | -0.088979  | -0.0547049 | -0.215444  | 0.391888  | 1.82676    | 2.27466   | 2.51612  | 1.33816    | 1.34108   | 0.671906  |
| 4 | Upb1     | 0 | 1.25341    | 2.07504    | 1.07269    | 0.973194  | 1.83688    | 2.09388   | 3.06665  | 2.78479    | 3.29111   | 2.42653   |
| 4 | Usp18    | 0 | 0.0470722  | 0.145745   | 0.332961   | 1.28367   | 2.29734    | 2.42854   | 2.6195   | 1.08214    | 1.58884   | 0.463521  |
| 4 | Usp53    | 0 | 0.566828   | 1.81653    | 2.18198    | 1.06949   | -1.40529   | 1.00716   | 1.34852  | 0.687034   | 0.922995  | -0.259603 |
| 4 | Usp54    | 0 | 0.809942   | 1.83164    | 1.90821    | 0.523302  | -1.82202   | 0.479268  | 0.448082 | 0.413761   | 0.0475697 | -0.113366 |
| 4 | Vav2     | 0 | 0.251599   | 0.224531   | 0.655225   | 0.636247  | -0.0752968 | 2.26224   | 2.47501  | 0.177854   | 0.958657  | -0.927036 |
| 4 | Vcam1    | 0 | 0.460961   | 1.23752    | 2.03396    | 1.14386   | 1.4093     | 2.42816   | 3.76777  | 1.90824    | 1.91352   | 1.52951   |
| 4 | Vcan     | 0 | 0.176845   | 0.787986   | 0.75806    | 0.904951  | 1.5073     | 3.07096   | 2.88496  | 1.29446    | 0.731472  | 0.548419  |
| 4 | Vrk2     | 0 | 0.185887   | 0.041218   | -0.0346963 | 0.535328  | 1.74869    | 2.51088   | 2.64358  | 1.52144    | 1.50036   | 0.721975  |
| 4 | Vstm4    | 0 | -0.415177  | -0.815645  | -0.306848  | -0.147902 | 1.28968    | 1.74879   | 1.53724  | 0.937605   | 2.13935   | 0.866882  |
| 4 | Vwa5a    | 0 | -0.422753  | 0.007974   | 0.326266   | 1.36874   | 1.65764    | 2.3167    | 2.59445  | 1.41911    | 1.77253   | 0.92503   |

|   |         |   |           |            |           |            |           |           |          |           |           |           |
|---|---------|---|-----------|------------|-----------|------------|-----------|-----------|----------|-----------|-----------|-----------|
| 4 | Vwa5b1  | 0 | -1.25754  | 0.545372   | 0.0858527 | -0.749399  | -0.763138 | 0.537047  | 1.48276  | 1.22214   | 1.75711   | 1.17585   |
| 4 | Wdfy2   | 0 | 0.723249  | 1.03584    | 0.240385  | 1.62444    | -1.09037  | 1.53218   | 2.76119  | 1.35559   | 1.06547   | 1.29759   |
| 4 | Wdr63   | 0 | 1.14214   | -0.0421447 | -0.100504 | 1.26825    | 0.41657   | 1.67207   | 2.08628  | 2.36186   | 2.6724    | 1.62271   |
| 4 | Wfdc17  | 0 | 0.322984  | 0.737742   | 0.593386  | 0.0293529  | 2.60752   | 2.40184   | 2.27557  | 1.774     | 2.06905   | 0.77      |
| 4 | Wipf1   | 0 | -0.581146 | 0.543309   | 0.623454  | 1.03439    | 2.29884   | 2.4313    | 2.4672   | 0.993827  | 1.35101   | 0.56924   |
| 4 | Xdh     | 0 | 1.13534   | 2.35557    | 2.33692   | 1.77577    | 2.11051   | 3.36426   | 3.29244  | 1.49751   | 1.6774    | 0.863409  |
| 4 | Xrn1    | 0 | -0.546037 | 0.35256    | 0.452376  | -0.220694  | -1.7277   | 0.561589  | 1.27771  | 0.831844  | 0.867218  | 2.087     |
| 4 | Zak     | 0 | -0.106774 | 0.242641   | 0.41984   | 2.95375    | 0.329915  | 1.46827   | 1.94146  | 0.312294  | 0.900228  | -0.324968 |
| 4 | Zbp1    | 0 | -0.238676 | 0.300678   | 0.527993  | 1.22393    | 2.28289   | 2.17282   | 2.61442  | 1.20102   | 1.6669    | 0.181427  |
| 4 | Zbtb7c  | 0 | -0.300117 | 0.947547   | 2.85541   | 2.02879    | 0.138478  | 1.51727   | 1.49995  | 0.752394  | 2.31627   | 1.43405   |
| 4 | Zc3hav1 | 0 | 0.771904  | 1.71329    | 1.29407   | 1.83113    | 2.48146   | 3.03039   | 3.54354  | 1.53918   | 1.9488    | 1.2105    |
| 4 | Zdhhc23 | 0 | -0.755282 | -0.715752  | -1.24946  | -0.809646  | -3.67944  | -0.448766 | -0.25414 | -0.145854 | -0.815581 | -0.582511 |
| 4 | Zfp185  | 0 | 1.20748   | 0.874197   | 1.54247   | 2.44325    | 1.26103   | 2.44768   | 2.73054  | 2.3568    | 2.87758   | 3.26892   |
| 4 | Zfp217  | 0 | 0.127272  | 0.101378   | 0.115943  | 0.847801   | 1.96524   | 2.3851    | 2.88619  | 1.39517   | 1.26198   | 0.758602  |
| 4 | Zfp229  | 0 | 0.577763  | 1.57116    | 1.78833   | 2.19197    | 2.00188   | 3.27772   | 2.96598  | 1.63873   | 2.72965   | 1.0346    |
| 4 | Zfp273  | 0 | -2.0965   | -1.96976   | -1.73759  | -1.26467   | -1.57164  | 0.706332  | -0.4406  | -0.316977 | 0.439956  | -0.115634 |
| 4 | Zfp3611 | 0 | 0.290813  | 0.646674   | 1.09227   | 1.28603    | 2.7311    | 2.73098   | 2.87829  | 1.25289   | 1.78854   | 0.912905  |
| 4 | Zfp3612 | 0 | -0.629826 | -0.357733  | 0.256496  | 0.931691   | 2.02934   | 2.28192   | 2.05156  | 0.925972  | 1.33602   | 0.471362  |
| 4 | Zfp429  | 0 | 1.67965   | 1.17604    | 1.57229   | 2.68885    | 1.77123   | 3.08847   | 3.3686   | 2.1438    | 3.17116   | 1.73085   |
| 4 | Zfp516  | 0 | 0.600148  | 2.33684    | 3.24757   | 0.19192    | 0.301826  | 1.93928   | 1.4568   | 0.694392  | 1.04151   | 1.12723   |
| 4 | Zfp658  | 0 | -0.78914  | -1.77265   | 0.313744  | -0.0679817 | 0.22259   | 0.942117  | 1.55976  | 0.63266   | 1.22929   | 1.45284   |
| 4 | Zfp677  | 0 | -0.206958 | 0.763202   | 0.138153  | 1.01548    | 1.93461   | 2.22794   | 2.63157  | 1.65875   | 2.33906   | 1.5813    |
| 4 | Zfp759  | 0 | -0.499685 | -1.41572   | -0.547986 | -0.65406   | -2.38725  | 0.184391  | 0.642732 | 1.00002   | 0.37138   | 0.623163  |
| 4 | Zic1    | 0 | -0.097202 | 0.040039   | 0.461078  | 1.07344    | 1.65723   | 2.01019   | 1.80942  | 1.11075   | 2.67464   | 2.44514   |
| 4 | Zic5    | 0 | -0.5767   | 0.469831   | -0.20608  | 0.444917   | 0.765658  | 2.23473   | 2.329    | 1.72449   | 1.82688   | 1.02229   |

## Innate

| Gene     | Log2 (1h vs. pre) | Log2 (3h vs. pre) | Log2 (6h vs. pre) | Log2 (1d vs. pre) | Log2 (3d vs. pre) | Log2 (1w vs. pre) | Log2 (2w vs. pre) | Log2 (1m vs. pre) | Log2 (2m vs. pre) | Log2 (6m vs. pre) | sig     |
|----------|-------------------|-------------------|-------------------|-------------------|-------------------|-------------------|-------------------|-------------------|-------------------|-------------------|---------|
| Sell     | 5.0944            | 5.6449            | 5.4058            | 6.0184            | 6.9385            | 5.6404            | 8.28              | 5.8615            | 8.1602            | 0                 | #N/A    |
| Cd8a     | 3.2792            | 2.9576            | 5.1443            | 4.7019            | 5.0474            | 3.3759            | 7.6067            | 6.1246            | 6.7838            | 6.0463            | #N/A    |
| C3       | 0.8447            | 0.8876            | 1.7096            | 3.8823            | 4.5371            | 4.4705            | 7.4944            | 7.0415            | 6.9883            | 4.3129            | C3      |
| Klrc1    | 2.3865            | 0                 | 0                 | 0                 | 5.7006            | 3.0464            | 7.0219            | 4.3482            | 5.5159            | 0                 | #N/A    |
| Cd96     | 4.4945            | 2.796             | 4.3458            | 3.889             | 0                 | 0                 | 6.4634            | 3.5901            | 5.0845            | 0                 | #N/A    |
| Cd226    | 3.4729            | 2.9521            | 0                 | 4.3576            | 0                 | 0                 | 6.1396            | 3.8881            | 6.0507            | 4.2546            | #N/A    |
| Ulbp1    | 0                 | 4.3542            | 3.6887            | 4.8033            | 7.191             | 6.5857            | 6.0124            | 4.2976            | 5.2125            | 3.5124            | #N/A    |
| Cybb     | 0.1               | 0.0866            | 0.1057            | 2.9732            | 5.0051            | 4.9041            | 5.9366            | 3.8983            | 5.2171            | 1.6258            | Cybb    |
| Cd74     | 0.5445            | 0.1015            | 0.2607            | 1.726             | 4.7119            | 2.1786            | 5.0646            | 4.0118            | 4.4572            | 1.645             | Cd74    |
| Pdcd1    | -0.2142           | 1.2329            | 1.7829            | 1.5638            | 4.0719            | 3.2388            | 4.9611            | 3.5872            | 2.6948            | 0.9696            | Pdcd1   |
| Cd19     | 0                 | 0                 | 2.7234            | 3.4153            | 0                 | 0                 | 4.6394            | 5.121             | 7.3935            | 4.3856            | #N/A    |
| Cd3g     | -1.6267           | -1.6686           | -2.416            | -0.2451           | 0.2199            | 0.2937            | 4.544             | 3.2386            | 3.7842            | 1.7956            | Cd3g    |
| Icos     | 1.6708            | 1.5719            | 2.1561            | 1.5156            | 3.197             | 2.6291            | 4.3093            | 2.6045            | 2.8496            | 1.5933            | #N/A    |
| Cd3e     | 0.1416            | -0.5353           | -0.5937           | 1.8041            | -3.3313           | 0.9187            | 4.2014            | 2.673             | 3.4452            | 2.467             | #N/A    |
| Fcgr2b   | 0.1034            | 0.1628            | 0.2427            | 2.1296            | 3.1906            | 3.3111            | 4.0739            | 2.541             | 2.219             | 0.8186            | Fcgr2b  |
| Ncf4     | 0.2786            | 0.5396            | 1.1271            | 2.4873            | 4.1758            | 3.6023            | 3.9527            | 2.5169            | 2.8662            | 1.5653            | Ncf4    |
| Klrk1    | 0.9785            | 2.3591            | 2.4776            | 0.5252            | 2.2319            | 0.6383            | 3.8526            | 2.0113            | 2.9237            | -1.5354           | Klrk1   |
| Card11   | -0.4423           | -0.0881           | 0.1213            | -0.4664           | 3.1568            | 2.8486            | 3.8378            | 1.1202            | 2.8681            | 0.8581            | Card11  |
| Blk      | 0                 | 0                 | 0                 | 2.1662            | 0                 | 0                 | 3.8294            | 3.9894            | 6.1618            | 0                 | #N/A    |
| Ctss     | 0.1695            | 0.3303            | 0.4172            | 0.6469            | 2.7569            | 3.2102            | 3.8063            | 2.3761            | 2.4669            | 1.0223            | Ctss    |
| Ptpn6    | 0.0998            | -0.4205           | 0.402             | 1.2999            | 3.0891            | 3.4682            | 3.7866            | 2.1696            | 2.2702            | 0.6202            | Ptpn6   |
| Ptprc    | 0.1373            | 0.2537            | 0.532             | 1.4805            | 2.8932            | 3.1709            | 3.7276            | 2.178             | 2.3595            | 0.3786            | Ptprc   |
| Asb12    | 2.9925            | 2.9521            | 2.7376            | 0                 | 0                 | 3.9833            | 3.6822            | 0                 | 2.9612            | 3.5124            | #N/A    |
| Cd160    | 2.9925            | 2.796             | 4.6105            | 2.1662            | 0                 | 0                 | 3.6157            | 2.1805            | 4.9788            | 0                 | #N/A    |
| Itgb2    | -0.5172           | 0.3494            | 0.3245            | 1.5258            | 3.0718            | 3.5162            | 3.5992            | 2.128             | 2.3112            | 0.7498            | Itgb2   |
| Tyrobp   | 0.0645            | 0.1475            | 0.1429            | 1.0426            | 3.4014            | 3.7381            | 3.5957            | 2.4152            | 2.1719            | 0.5491            | Tyrobp  |
| Tnfrsf14 | 0.3729            | -0.2333           | 1.1441            | 0.861             | 3.4408            | 2.5939            | 3.5705            | 1.9879            | 2.0987            | -0.6166           | #N/A    |
| Itgb7    | 0.649             | 0.2301            | 1.3101            | 1.3999            | 3.2371            | 2.0173            | 3.5036            | 1.6613            | 2.3121            | 1.1253            | Itgb7   |
| Cyba     | 0.3217            | 0.0958            | 0.3291            | 1.3676            | 3.8764            | 3.6251            | 3.4848            | 2.2375            | 2.5009            | 0.8009            | Cyba    |
| Pik3ap1  | -0.189            | 0.9416            | 0.7573            | 1.4043            | 2.0066            | 3.2664            | 3.4835            | 1.5863            | 1.8758            | 0.434             | Pik3ap1 |
| Ctsh     | 0.0324            | -0.2862           | 0.0658            | 0.5314            | 3.6814            | 3.2854            | 3.4746            | 2.0551            | 2.1402            | 0.9724            | Ctsh    |
| Psmb8    | -0.516            | -0.5524           | -0.3231           | 1.2659            | 3.2868            | 2.8771            | 3.4286            | 1.7156            | 1.9045            | 0.8602            | Psmb8   |

|         |         |         |         |         |         |         |        |         |        |         |         |
|---------|---------|---------|---------|---------|---------|---------|--------|---------|--------|---------|---------|
| Klrd1   | -0.4648 | -4.0767 | 0.716   | 0.2341  | 2.9205  | -0.1511 | 3.416  | 1.7831  | 2.1523 | -4.0767 | #N/A    |
| Cd86    | 1.0539  | 1.606   | 1.6158  | 1.7663  | 2.3627  | 2.7127  | 3.3439 | 1.8894  | 1.472  | 0.582   | Cd86    |
| Psemb9  | -0.9778 | 0.1565  | 0.0654  | 0.7246  | 3.0461  | 2.4187  | 3.3266 | 1.8648  | 1.9635 | 0.9549  | Psemb9  |
| Btk     | -0.8065 | 0.088   | 0.2109  | 1.2909  | 2.7785  | 3.2267  | 3.2103 | 1.6259  | 1.9415 | 0.6263  | Btk     |
| Tap1    | -0.5433 | -0.4643 | 0.3919  | 1.443   | 2.5487  | 2.2939  | 3.1878 | 1.0676  | 1.294  | 0.8906  | Tap1    |
| B2m     | 0.2281  | 0.394   | 0.4343  | 0.5762  | 2.6762  | 2.542   | 3.1262 | 1.9345  | 1.8342 | 0.746   | B2m     |
| Itgal   | 0.2405  | 0.6284  | 0.1962  | 1.3793  | 2.3315  | 2.3593  | 3.0793 | 1.7787  | 1.8273 | 0.3514  | Itgal   |
| Fyb     | 0.2899  | 0.4126  | 0.7606  | 1.4027  | 3.1725  | 3.1659  | 3.0589 | 1.7154  | 1.6131 | 0.3099  | Fyb     |
| Kif2c   | 0.5565  | 1.0934  | 0.098   | 1.3466  | 5.2306  | 4.3413  | 3.0451 | 1.7952  | 1.3432 | -0.3858 | Kif2c   |
| Uba7    | 0.2762  | -0.4042 | -0.5826 | 0.658   | 2.9385  | 3.1005  | 3.0304 | 1.7508  | 1.3938 | 0.5119  | Uba7    |
| Cd28    | -0.3733 | 0.1546  | 0.4254  | 1.058   | 1.3638  | 1.8283  | 2.9968 | 0.8644  | 1.6386 | -0.9022 | Cd28    |
| Cd36    | 0.2152  | 0.5452  | 0.5538  | 1.7877  | 3.0161  | 3.3318  | 2.9902 | 1.386   | 4.0107 | 1.0848  | Cd36    |
| Pσμα8   | 2.0677  | 2.429   | 2.1036  | 2.9831  | 3.2089  | 2.9132  | 2.9275 | 2.3367  | 2.0252 | 2.1519  | #N/A    |
| Icam1   | 1.5323  | 1.5745  | 3.1504  | 2.573   | 2.4591  | 2.4282  | 2.913  | 1.5589  | 1.843  | 1.3047  | Icam1   |
| Ctsc    | -0.0233 | -0.1652 | 0.2516  | 1.9976  | 2.9091  | 2.6761  | 2.9075 | 1.374   | 1.637  | 0.2433  | Ctsc    |
| Ctsd    | 0.1489  | 0.0864  | 0.1593  | 0.6176  | 3.1401  | 3.4722  | 2.9019 | 1.589   | 1.3668 | 0.829   | Ctsd    |
| Vav1    | -0.2154 | 0.1398  | 0.5475  | 1.4654  | 3.1654  | 2.9002  | 2.8899 | 1.5063  | 1.3741 | 0.3454  | Vav1    |
| Cd247   | 0.5427  | 0.1822  | -0.833  | 1.5296  | 2.1296  | -1.7206 | 2.7428 | 1.3678  | 1.1936 | -4.1971 | #N/A    |
| Lyn     | 0.2484  | 0.4018  | 0.5045  | 1.3517  | 2.3077  | 2.6211  | 2.7036 | 1.4305  | 1.2863 | 0.4297  | Lyn     |
| Btla    | 1.8166  | 1.4126  | 1.6625  | 1.7997  | 0.437   | 1.5559  | 2.7006 | 1.5165  | 2.7457 | 1.5042  | Btla    |
| Ncf2    | 0.0431  | 0.1139  | 0.6884  | 0.8265  | 2.4645  | 2.4004  | 2.6692 | 1.4061  | 1.5561 | 0.1475  | Ncf2    |
| Lat     | 1.4111  | 1.3141  | 1.3932  | 1.02    | 1.9798  | 1.0548  | 2.5469 | 1.6795  | 2.3057 | 0.0577  | #N/A    |
| Lcp2    | -0.3807 | 0.323   | 0.5443  | 1.6301  | 2.5125  | 2.6955  | 2.4988 | 1.0861  | 1.1546 | 0.1239  | Lcp2    |
| Cd40    | 0.3977  | 0.4486  | 1.1199  | 1.6414  | 2.8859  | 1.9117  | 2.4468 | 1.0794  | 1.2691 | 0.9959  | Cd40    |
| Plcg2   | 0.0416  | 0.1069  | 0.2146  | 0.9007  | 2.5255  | 2.5945  | 2.4345 | 1.2421  | 1.1621 | 0.19    | Plcg2   |
| Amica1  | 1.2759  | 1.2651  | 2.0614  | 1.4651  | 2.2061  | 0.9604  | 2.3974 | 0.0045  | 1.1868 | -0.351  | Amica1  |
| Hcst    | -0.8271 | -0.4177 | 0.6669  | 0.7594  | 3.197   | 3.2718  | 2.3925 | 0.9371  | 1.0692 | -0.0965 | #N/A    |
| Syk     | -0.2857 | -0.2429 | -0.2594 | 0.702   | 1.8876  | 2.0796  | 2.3732 | 0.9845  | 1.253  | -0.0596 | Syk     |
| Ctla4   | -3.2137 | -3.2137 | -0.4902 | 0.6753  | -3.2137 | 0.7657  | 2.2508 | -1.0331 | 1.5363 | -3.2137 | #N/A    |
| Cd200r1 | 0.0548  | 0.8497  | 0.3657  | 0.9361  | 1.1512  | 1.6477  | 2.2381 | 1.3282  | 1.7515 | 0.5305  | Cd200r1 |
| Cd40lg  | 2.3865  | 0       | 0       | 0       | 4.2808  | 0       | 2.1973 | 0       | 2.9612 | 0       | #N/A    |
| Cd79b   | -1.5864 | -4.5859 | -0.5453 | -0.1937 | 2.513   | 1.7243  | 2.0675 | 2.0696  | 3.0221 | -0.2003 | #N/A    |
| Trim21  | -0.2752 | 0.2426  | 0.2685  | 0.9597  | 1.1337  | 1.8801  | 2.066  | 0.9978  | 1.309  | 0.7415  | Trim21  |
| Itgb5   | 0.0052  | -0.0428 | -0.2331 | 0.0221  | 1.6718  | 2.18    | 1.9824 | 1.014   | 0.8136 | 0.24    | Itgb5   |
| Dtx3l   | -0.2414 | 0.1119  | 0.3453  | 0.5921  | 1.3904  | 1.5571  | 1.9243 | 0.5372  | 0.8675 | 0.4356  | Dtx3l   |
| Mrc2    | -0.4416 | -0.1425 | -0.3888 | 0.1285  | 1.2448  | 1.6689  | 1.9029 | 0.7921  | 1.0667 | 0.7059  | Mrc2    |
| Ctsb    | 0.067   | 0.1213  | 0.1953  | 0.4376  | 1.8553  | 2.172   | 1.8242 | 0.8212  | 0.8626 | 0.2342  | Ctsb    |
| Tap2    | 0.2001  | -0.1887 | 0.1019  | 0.9118  | 1.5336  | 1.284   | 1.8078 | 0.6993  | 0.9396 | 0.6714  | Tap2    |

|          |         |         |         |         |         |         |        |         |         |         |         |
|----------|---------|---------|---------|---------|---------|---------|--------|---------|---------|---------|---------|
| Cd80     | 1.0707  | 1.0134  | 1.5339  | 1.1999  | 2.236   | 0.7308  | 1.7746 | 0.9281  | 1.5259  | 1.9343  | #N/A    |
| Lgmn     | 0.1931  | 0.1831  | 0.2877  | 0.5865  | 2.3139  | 2.1247  | 1.7293 | 0.7063  | 0.6684  | 0.2614  | Lgmn    |
| Ifitm1   | -1.2604 | 0.1034  | 0.1205  | 1.7659  | 2.9373  | 1.4381  | 1.7269 | 0.9183  | 0.9837  | 0.5426  | Ifitm1  |
| Socs3    | 1.4058  | 1.8922  | 2.5199  | 3.5059  | 3.0082  | 1.4683  | 1.6474 | 0.7431  | 0.5004  | -0.7676 | Socs3   |
| Pdcd1lg2 | -2.965  | -0.169  | 0.1232  | 2.537   | -2.965  | 1.4197  | 1.6434 | 1.3285  | 0.79    | 1.9338  | #N/A    |
| Erap1    | -0.0605 | 0.209   | 0.2214  | 0.7902  | 0.8162  | 1.3596  | 1.6404 | 0.9398  | 0.9423  | 0.6335  | Erap1   |
| Trim63   | 0.829   | 2.8255  | 0.7163  | 1.6342  | 2.0824  | 1.3842  | 1.622  | 2.1653  | 2.1428  | 2.409   | #N/A    |
| Ctsa     | -0.0469 | -0.1489 | -0.0869 | 0.24    | 1.3604  | 1.7962  | 1.6139 | 0.6589  | 0.505   | 0.0482  | Ctsa    |
| Ube2c    | 0.5748  | 0.7112  | 1.266   | 1.3839  | 4.7387  | 3.1351  | 1.5886 | 0.2993  | 0.5963  | -0.0138 | Ube2c   |
| Map3k8   | 0.3141  | 1.1174  | 1.6822  | 0.5616  | 1.1044  | 1.5487  | 1.5799 | 0.9805  | 0.9679  | 0.4401  | Map3k8  |
| Mrc1     | 0.0017  | 0.4589  | 0.2767  | 0.8785  | 0.8656  | 1.0732  | 1.5731 | 0.5958  | 1.1552  | 0.1212  | Mrc1    |
| Cd79a    | 0.2911  | -0.0256 | 0.0654  | 0.4974  | 1.0583  | 0.0511  | 1.533  | 1.0985  | 2.9232  | 0.2491  | #N/A    |
| Ube2l6   | -0.3016 | -0.2114 | -0.2775 | 0.2585  | 1.2609  | 1.1985  | 1.5274 | 0.3784  | 0.617   | 0.0806  | Ube2l6  |
| Kif15    | 0.6236  | 0.4496  | 0.3577  | 0.6294  | 3.4721  | 2.8899  | 1.4919 | 0.4175  | 0.6703  | -0.2928 | Kif15   |
| Cd274    | 0.3259  | 0.5027  | 0.3284  | 0.7727  | 0.9311  | 0.7922  | 1.4532 | 0.5468  | 0.485   | 1.3835  | Cd274   |
| Kif22    | -0.4568 | 0.1917  | 0.2849  | 1.0876  | 3.5753  | 2.3971  | 1.4308 | 0.5316  | 0.048   | 0.5105  | Kif22   |
| Kif20a   | -0.9218 | -0.1306 | -0.001  | -0.4607 | 3.4048  | 2.6686  | 1.4008 | 0.5179  | 0.1305  | -0.424  | Kif20a  |
| Kif18a   | 1.1239  | 0.6967  | 0.6092  | 1.1832  | 2.2578  | 1.9036  | 1.3759 | 0.8273  | 0.8574  | 0.5326  | Kif18a  |
| Vcam1    | 0.1674  | 0.4494  | 0.7386  | 0.4154  | 0.5117  | 0.8817  | 1.3681 | 0.6929  | 0.6948  | 0.5554  | Vcam1   |
| Cdc20    | -0.1295 | 0.7841  | -0.159  | 0.4293  | 3.6366  | 2.3447  | 1.3233 | 0.2422  | -0.5537 | -2.1995 | Cdc20   |
| Vasp     | 0.4026  | 0.0394  | 0.4332  | 0.9634  | 1.4543  | 1.3891  | 1.3084 | 0.3911  | 0.7594  | 0.1041  | Vasp    |
| Blnk     | 0.1605  | 0.6933  | 1.2485  | 0.7719  | 1.0985  | 1.193   | 1.3038 | 0.2929  | 0.2369  | -0.4639 | Blnk    |
| Was      | 0.3221  | 0.6158  | 0.5514  | 0.4838  | 1.4745  | 1.0435  | 1.2834 | 0.3702  | 0.2664  | -0.021  | Was     |
| Itk      | 0.1152  | 0.2385  | 0.3081  | -0.0149 | -0.1512 | -0.0321 | 1.2818 | 0.5481  | 0.9917  | 0.4245  | Itk     |
| Cdh1     | -0.2579 | 1.388   | 0.9344  | 0.8606  | 0.9375  | 1.3458  | 1.2782 | 1.0762  | 1.5071  | 0.9766  | Cdh1    |
| Rasgrp3  | 0.0655  | 0.2784  | 0.4336  | 0.1447  | 0.7727  | 1.2196  | 1.205  | 0.595   | 0.3493  | 0.2899  | Rasgrp3 |
| Ctsk     | 0.2443  | 0.0874  | -0.2047 | 0.3518  | -0.1209 | 1.0469  | 1.1868 | 0.326   | 1.4638  | 0.326   | Ctsk    |
| Spsb2    | 0.4932  | 0.3978  | 0.2808  | 0.9008  | 2.073   | 1.3165  | 1.1326 | 0.8199  | 0.9459  | 0.5578  | Spsb2   |
| Nfkbie   | -0.2384 | 0.0341  | 0.1221  | 0.2455  | 1.1197  | 0.7467  | 1.1285 | 0.2243  | 0.2596  | -0.4942 | Nfkbie  |
| Psme2    | -0.0469 | -0.3544 | -0.1657 | 0.5024  | 1.528   | 0.971   | 1.1003 | 0.5048  | 0.6171  | 0.3882  | Psme2   |
| Itgb1    | 0.0573  | 0.2697  | 0.2705  | 0.6815  | 1.1575  | 1.128   | 1.0421 | 0.498   | 0.6511  | 0.4027  | Itgb1   |
| Lrr1     | 1.5295  | -0.0075 | 1.5231  | 1.3056  | 4.4858  | 2.8512  | 1.0407 | 0.1241  | -2.965  | 0.1521  | #N/A    |
| Psme1    | 0.0898  | 0.178   | 0.1012  | 0.3746  | 1.4899  | 0.998   | 1.0387 | 0.5907  | 0.6431  | 0.4604  | Psme1   |
| Shc1     | 0.0129  | 0.2436  | 0.4724  | 0.5669  | 1.0256  | 1.0726  | 1.0148 | -0.0098 | 0.3329  | -0.0229 | Shc1    |
| Rel      | 0.6275  | 0.6615  | 0.9227  | 0.5684  | 0.3503  | 0.2523  | 0.9293 | 0.2979  | 0.1943  | -0.6274 | Rel     |
| Kif11    | 0.0397  | 0.2772  | 0.2052  | 0.1338  | 2.5877  | 1.865   | 0.9195 | 0.4318  | 0.191   | -0.0555 | Kif11   |
| Itpr2    | 0.1402  | 0.1811  | 0.1763  | 0.1693  | 0.9336  | 1.0591  | 0.8771 | 0.3109  | 0.1997  | -0.0178 | Itpr2   |
| Sipa1    | -0.0335 | -0.2485 | 0.0236  | 0.343   | 1.7482  | 1.1051  | 0.8565 | 0.2697  | 0.3233  | 0.0044  | Sipa1   |

|          |         |         |         |         |         |         |        |         |         |         |         |
|----------|---------|---------|---------|---------|---------|---------|--------|---------|---------|---------|---------|
| Dnm2     | 0.1518  | 0.1045  | 0.2428  | 0.5617  | 0.743   | 1.0083  | 0.8372 | 0.4215  | 0.2937  | 0.1721  | Dnm2    |
| Itpr3    | 0.0423  | -0.2935 | -0.0151 | 0.5078  | 0.9324  | 1.1711  | 0.8292 | 0.4695  | 0.4906  | 0.7321  | Itpr3   |
| Orai1    | 0.3226  | 0.0201  | 0.2536  | 0.4283  | 1.6705  | 1.0792  | 0.792  | 0.0866  | 0.1593  | 0.0627  | Orai1   |
| Pvrl2    | 0.4094  | 0.3091  | 0.5219  | 0.5666  | 1.7256  | 0.9239  | 0.7804 | 0.7043  | 0.5828  | 0.6343  | Pvrl2   |
| Trib3    | -0.2439 | 0.7124  | 0.6673  | 1.3601  | 0.9693  | -0.9029 | 0.7779 | 0.0479  | -0.0112 | -0.3205 | #N/A    |
| Csk      | -0.0374 | -0.0702 | -0.0302 | 0.417   | 1.1255  | 0.8152  | 0.7286 | 0.2309  | 0.4927  | 0.1797  | Csk     |
| Ripk2    | 0.4624  | 0.5364  | 0.5257  | 0.3085  | 0.4632  | 0.6776  | 0.6383 | 0.1336  | 0.3871  | 0.381   | Ripk2   |
| Ctso     | -0.0338 | 0.1763  | 0.2813  | 0.0728  | 0.1174  | 0.4899  | 0.632  | 0.3995  | 0.338   | 0.329   | #N/A    |
| Rap1b    | 0.0474  | 0.285   | 0.3216  | 0.4442  | 0.4485  | 0.684   | 0.6121 | 0.2653  | 0.2517  | 0.0327  | Rap1b   |
| Prkcq    | 0.2914  | 0.0705  | 0.3817  | 0.0863  | 0.2496  | 0.6226  | 0.601  | 0.5934  | 0.4344  | 0.3604  | #N/A    |
| Malt1    | -0.0526 | 0.1842  | 0.4683  | 0.4092  | 0.2727  | 0.3759  | 0.5949 | 0.1512  | 0.1021  | -0.0294 | Malt1   |
| Cd34     | -0.0367 | 0.0612  | 0.0441  | 0.1372  | 0.1754  | 0.3837  | 0.5938 | 0.4238  | 0.2881  | 0.3529  | #N/A    |
| Rela     | 0.1259  | 0.0987  | 0.3783  | 0.5899  | 0.5953  | 0.6446  | 0.5912 | 0.1803  | 0.1615  | 0.0465  | Rela    |
| Icam2    | 0.095   | -0.3935 | -0.1558 | 0.6376  | 1.2253  | 0.8776  | 0.5705 | 0.183   | 0.6155  | 0.2726  | #N/A    |
| Lnpep    | -0.0819 | 0.2818  | -0.1468 | -0.2056 | -0.7051 | 0.1057  | 0.5612 | 0.3268  | 0.3036  | 0.2294  | #N/A    |
| Map3k14  | 0.1284  | 0.4356  | 0.6481  | 0.5154  | 0.4744  | 0.5809  | 0.5579 | -0.1794 | 0.2994  | -0.4282 | Map3k14 |
| Bcl10    | 0.0711  | 0.3632  | 0.5871  | 0.6152  | 0.1967  | 0.5391  | 0.5454 | 0.2994  | 0.5433  | 0.452   | Bcl10   |
| Rap1a    | 0.0759  | 0.1876  | 0.2628  | 0.3477  | 0.4452  | 0.5101  | 0.5084 | 0.3514  | 0.4439  | 0.1598  | #N/A    |
| Lck      | -0.3856 | -0.3974 | -0.3615 | -0.1789 | 0.2409  | -0.8957 | 0.4898 | 0.3634  | 0.4409  | -0.7459 | #N/A    |
| Ap1m2    | 0.8386  | 0.5382  | 1.0175  | -0.1979 | -5.405  | -1.3554 | 0.478  | 0.2867  | -0.0138 | 0.2496  | #N/A    |
| Trim36   | -0.3613 | -0.0669 | 0.0713  | -0.0064 | 0.0122  | 0.2641  | 0.4685 | 0.2519  | 0.3014  | 0.2824  | #N/A    |
| Pag1     | -0.0805 | -0.002  | 0.1096  | -0.0634 | 0.1192  | 0.3443  | 0.4593 | 0.0739  | 0.0349  | -0.0952 | #N/A    |
| Sec24d   | -0.2123 | 0.2942  | 0.4449  | 0.5098  | 0.1372  | 0.397   | 0.4586 | 0.1914  | 0.2861  | 0.1652  | #N/A    |
| Dync2h1  | 0.207   | 0.2916  | 0.1581  | -0.04   | -0.3191 | 0.2367  | 0.4375 | 0.4729  | 0.4562  | 0.457   | #N/A    |
| Anapc13  | 0.3067  | 0.2618  | 0.2997  | 0.1753  | 1.1337  | 0.3824  | 0.4354 | 0.3121  | 0.4268  | 0.3592  | #N/A    |
| Rilp     | 0.1667  | 0.1933  | 0.6138  | 0.6812  | 0.4981  | 0.1394  | 0.4211 | -0.0146 | 1.0031  | 0.442   | #N/A    |
| Asb2     | 0.277   | 0.2089  | 0.4993  | 0.4872  | 0.81    | 0.4231  | 0.4208 | -0.0664 | 0.3858  | 0.0693  | #N/A    |
| Pik3cd   | -0.1608 | -0.2836 | -0.1423 | -0.0543 | 0.3912  | 0.3114  | 0.4204 | -0.087  | -0.1732 | -0.4668 | #N/A    |
| Kif23    | 0.7057  | 0.7383  | 0.7565  | -0.1003 | 2.5207  | 1.9743  | 0.4129 | -0.2129 | -0.1375 | -0.3058 | Kif23   |
| Yes1     | -0.0898 | 0.2559  | 0.3129  | 0.3647  | -0.2648 | 0.3974  | 0.3951 | 0.1937  | 0.3382  | 0.2552  | #N/A    |
| Pak2     | -0.0134 | 0.1169  | 0.08    | 0.2108  | 0.2326  | 0.3578  | 0.3825 | 0.1421  | 0.0942  | -0.0007 | #N/A    |
| Rapgef3  | 0.3879  | 0.1387  | 0.1786  | 0.1775  | 0.256   | 0.2868  | 0.3768 | 0.2462  | 0.2267  | 0.1489  | #N/A    |
| Cbl      | -0.0676 | 0.2837  | 0.0443  | 0.0609  | -0.4599 | 0.056   | 0.3736 | 0.1287  | 0.1047  | 0.0335  | #N/A    |
| Asb4     | 0.7436  | 0.6447  | 0.3766  | 0.2449  | 0.4168  | 0.1044  | 0.3577 | 0.5748  | 0.988   | 1.2321  | Asb4    |
| Dync1h1  | 0.0646  | 0.1145  | -0.0431 | -0.1512 | -0.3904 | 0.1318  | 0.3545 | 0.2918  | 0.2126  | 0.3142  | #N/A    |
| Dync2li1 | 0.0525  | -0.0994 | 0.0166  | 0.0859  | -0.1818 | 0.334   | 0.3526 | 0.4286  | 0.4718  | 0.2868  | #N/A    |
| Nck1     | 0.1431  | 0.2368  | 0.2327  | 0.1428  | -0.008  | 0.2068  | 0.3505 | 0.3843  | 0.42    | 0.5323  | #N/A    |
| Cd81     | -0.0231 | -0.0894 | -0.0024 | 0.1126  | 0.3331  | 0.3721  | 0.3406 | 0.0817  | 0.0373  | -0.0788 | #N/A    |

|         |         |         |         |         |         |         |        |         |         |         |        |
|---------|---------|---------|---------|---------|---------|---------|--------|---------|---------|---------|--------|
| Gan     | 0.1625  | 0.5318  | 0.4485  | 0.57    | -0.2778 | 0.1211  | 0.3401 | 0.3993  | 0.3121  | 0.1336  | #N/A   |
| Fbxo17  | 0.433   | 1.2159  | 1.4797  | 1.2486  | 0.8718  | 0.201   | 0.3336 | 0.0095  | 0.2672  | 0.2058  | Fbxo17 |
| Foxo4   | 0.1179  | 0.0839  | 0.2536  | 0.034   | 0.4047  | 0.4459  | 0.3197 | 0.1183  | 0.3283  | 0.214   | #N/A   |
| Sec61a1 | -0.0513 | -0.0978 | 0.2042  | 0.5235  | 0.5735  | 0.2528  | 0.3133 | -0.1348 | -0.0029 | -0.2989 | #N/A   |
| Cul7    | -0.2437 | -0.4886 | -0.3946 | -0.1412 | -0.0768 | 0.125   | 0.3099 | 0.0875  | 0.1195  | 0.0437  | #N/A   |
| Rnf144b | -0.0319 | 0.1515  | 0.0464  | -0.0387 | -0.2906 | 0.1357  | 0.2945 | -0.0848 | -0.0053 | 0.0584  | #N/A   |
| Clta    | -0.0156 | -0.1046 | -0.1659 | -0.0117 | 0.6151  | 0.3881  | 0.2893 | 0.1266  | 0.1301  | 0.1578  | #N/A   |
| Skp2    | -0.1368 | -0.016  | 0.3622  | 0.2281  | -0.1356 | 0.3261  | 0.2883 | -0.0877 | 0.1124  | 0.2879  | #N/A   |
| Pdia3   | 0.1408  | 0.2286  | -0.0108 | 0.1194  | 0.514   | 0.4403  | 0.2801 | 0.159   | 0.047   | -0.2027 | #N/A   |
| Trip12  | -0.0245 | 0.2137  | 0.1291  | 0.0799  | -0.4527 | 0.1571  | 0.2781 | 0.1979  | 0.1732  | 0.1606  | #N/A   |
| Spsb1   | 0.5349  | 0.585   | 0.5318  | 0.6544  | 0.9332  | 0.7394  | 0.2759 | -0.022  | 0.0005  | 0.0224  | Spsb1  |
| Icam4   | -0.1945 | 0.6344  | 0.136   | 0.0262  | -0.1937 | 0.5362  | 0.2555 | -0.2881 | 0.6571  | -0.9062 | #N/A   |
| Cdc26   | 0.0474  | -0.1273 | 0.0351  | 0.147   | 0.4086  | 0.2604  | 0.2445 | 0.3655  | 0.4419  | 0.5048  | #N/A   |
| Sh3kbp1 | -0.0539 | -0.0646 | -0.222  | -0.0856 | -0.0457 | 0.1767  | 0.2437 | 0.0538  | 0.0007  | 0.0922  | #N/A   |
| Psme4   | 0.0255  | 0.1849  | 0.2394  | 0.224   | -0.0594 | 0.0674  | 0.2431 | 0.0613  | 0.0612  | 0.0073  | #N/A   |
| Traf6   | 0.038   | 0.3547  | 0.5471  | 0.4203  | -0.1795 | 0.231   | 0.2418 | 0.1304  | 0.1848  | 0.1355  | #N/A   |
| Trat1   | 0.1844  | -1.5857 | 1.7931  | 1.1348  | 0.3084  | -0.2132 | 0.2416 | 0.2633  | 0.5474  | -0.3544 | #N/A   |
| Anapc1  | -0.2224 | -0.0404 | -0.1198 | -0.0372 | -0.3629 | 0.1179  | 0.2376 | 0.118   | 0.039   | 0.1142  | #N/A   |
| Sec61b  | -0.0633 | -0.4694 | -0.3888 | 0.3272  | 0.9541  | 0.4431  | 0.2263 | 0.0349  | 0.3495  | 0.301   | #N/A   |
| Ikbkb   | 0.0638  | -0.0605 | -0.0971 | -0.1208 | -0.2638 | 0.1467  | 0.2126 | -0.0007 | -0.0717 | -0.0523 | #N/A   |
| Nedd4   | -0.1304 | 0.0304  | -0.0861 | -0.0524 | -0.6804 | 0.1314  | 0.2121 | 0.1828  | 0.0922  | 0.1376  | #N/A   |
| Phlpp1  | -0.0704 | -0.0991 | -0.1918 | -0.3461 | -0.7111 | -0.0412 | 0.2119 | 0.2416  | 0.0846  | 0.0746  | #N/A   |
| Sec13   | -0.0089 | -0.0015 | 0.0678  | 0.195   | 0.2342  | 0.2363  | 0.21   | 0.0954  | -0.0335 | -0.0689 | #N/A   |
| Cdkn1b  | 0.2451  | 0.1559  | 0.0852  | -0.0274 | 0.1444  | 0.1794  | 0.2057 | 0.1697  | 0.2328  | 0.0823  | #N/A   |
| Psmb10  | 0.1197  | 0.1787  | 0.1707  | 0.1182  | 0.9954  | 0.088   | 0.202  | -0.009  | 0.142   | 0.175   | #N/A   |
| Cltc    | -0.0191 | 0.1763  | -0.0084 | -0.1464 | -0.6869 | 0.0332  | 0.1994 | 0.1549  | 0.0338  | 0.0474  | #N/A   |
| Klc3    | -0.2969 | -0.6715 | -0.7038 | -0.3579 | 0.273   | 0.1737  | 0.1989 | 0.0298  | 0.2631  | 0.6409  | #N/A   |
| Cdc23   | -0.0549 | -0.0325 | -0.0089 | -0.0834 | -0.4813 | 0.1561  | 0.1987 | 0.2636  | 0.1509  | 0.2964  | #N/A   |
| Tab2    | -0.109  | -0.0006 | 0.1018  | 0.1377  | 0.2525  | 0.2416  | 0.1964 | 0.0492  | 0.0523  | 0.0235  | #N/A   |
| Wwp1    | -0.0824 | 0.0005  | -0.0029 | -0.023  | -0.2972 | 0.1996  | 0.1956 | 0.066   | -0.1217 | -0.0718 | #N/A   |
| Rps27a  | 0.1037  | 0.1529  | 0.2455  | 0.3379  | 1.1719  | 0.2611  | 0.1955 | 0.1488  | 0.3032  | 0.1641  | #N/A   |
| Pik3r3  | 0.0665  | 0.1398  | 0.1816  | 0.0838  | -0.3877 | 0.3729  | 0.1916 | 0.0968  | 0.0553  | 0.0104  | #N/A   |
| Nfkbia  | 0.5199  | 0.4644  | 0.304   | 0.5425  | 0.9523  | 0.1397  | 0.1913 | -0.3802 | -0.1448 | -0.3242 | #N/A   |
| Ube2f   | 0.0964  | 0.3843  | 0.3494  | 0.2893  | 0.253   | 0.0943  | 0.1881 | 0.1375  | 0.1579  | 0.3905  | #N/A   |
| Rchy1   | 0.0528  | 0.1687  | 0.2818  | 0.4374  | 0.0973  | 0.0204  | 0.1875 | 0.1052  | 0.259   | 0.1312  | #N/A   |
| Psmd4   | 0.1336  | 0.0571  | 0.1353  | 0.1601  | 0.59    | 0.2628  | 0.1866 | 0.1317  | 0.2078  | 0.228   | #N/A   |
| Anapc7  | -0.0947 | -0.3496 | -0.0841 | 0.0092  | 0.2752  | 0.135   | 0.1864 | 0.0162  | 0.0226  | -0.01   | #N/A   |
| Ube3a   | 0.2331  | 0.1868  | 0.1099  | 0.2783  | 0.2616  | 0.0844  | 0.1845 | 0.267   | 0.2638  | 0.1977  | #N/A   |

|         |         |         |         |         |         |         |        |         |         |         |         |
|---------|---------|---------|---------|---------|---------|---------|--------|---------|---------|---------|---------|
| Nras    | -0.0977 | 0.0826  | 0.2208  | 0.4146  | 0.7532  | 0.3034  | 0.1833 | -0.1681 | -0.2261 | -0.2207 | #N/A    |
| Ubr2    | -0.0785 | -0.0741 | -0.085  | -0.0272 | -0.6199 | 0.0764  | 0.1736 | 0.0653  | -0.0087 | 0.0426  | #N/A    |
| Psama1  | 0.1013  | 0.0864  | 0.0194  | 0.1452  | 0.3395  | 0.1737  | 0.1673 | 0.2252  | 0.1518  | 0.0804  | #N/A    |
| Racgap1 | -0.0394 | -0.0299 | 0.1892  | 0.0811  | 1.1276  | 0.903   | 0.1619 | -0.0716 | -0.3405 | 0.1403  | Racgap1 |
| Ubr4    | -0.0383 | 0.0359  | -0.1477 | -0.1485 | -0.5814 | 0.0315  | 0.1602 | 0.0993  | 0.0391  | 0.1299  | #N/A    |
| Psmc2   | 0.1624  | 0.1609  | 0.1614  | 0.3124  | 0.2699  | 0.1481  | 0.157  | 0.2189  | 0.1697  | 0.3605  | #N/A    |
| Cblb    | 0.0508  | 0.1535  | 0.2483  | 0.0432  | -0.7329 | 0.0748  | 0.1491 | 0.1485  | -0.0084 | -0.0796 | #N/A    |
| Sos1    | 0.0409  | 0.0063  | 0.0314  | 0.026   | -0.5953 | -0.0553 | 0.1468 | 0.1348  | 0.2294  | 0.2845  | #N/A    |
| Psama6  | 0.109   | 0.1509  | 0.1587  | 0.339   | 0.552   | 0.1908  | 0.1441 | 0.2648  | 0.2893  | 0.3122  | #N/A    |
| Mdm2    | 0.0887  | 0.3787  | 0.4971  | 0.7286  | 0.1471  | 0.2825  | 0.1431 | -0.0694 | -0.0766 | -0.0863 | #N/A    |
| Ppp2r1b | 0.0009  | 0.3184  | 0.3849  | 0.586   | 0.2917  | 0.3132  | 0.1428 | -0.0245 | -0.0183 | -0.1442 | Ppp2r1b |
| Anapc2  | -0.1337 | -0.2993 | -0.2199 | -0.0881 | -0.1203 | 0.1095  | 0.1427 | 0.0626  | 0.0907  | 0.0951  | #N/A    |
| Ap1s2   | 0.0893  | 0.0928  | 0.0503  | 0.0932  | -0.0657 | 0.1754  | 0.1412 | 0.2198  | 0.3718  | 0.4227  | #N/A    |
| Canx    | 0.0344  | 0.1589  | 0.0163  | 0.0232  | -0.306  | 0.0452  | 0.1406 | 0.0533  | 0.0964  | -0.0147 | #N/A    |
| Asb5    | 0.7019  | 0.0836  | 0.298   | 0.9788  | 0.1984  | 0.3848  | 0.1402 | -0.4678 | -0.5626 | 0.433   | #N/A    |
| Pik3ca  | 0.1504  | 0.083   | 0.1139  | 0.0891  | 0.3115  | 0.1606  | 0.1402 | 0.137   | 0.1266  | 0.0258  | #N/A    |
| Ube2l3  | -0.0477 | 0.0328  | 0.0304  | 0.1064  | 0.1191  | 0.1552  | 0.1353 | 0.0057  | -0.0444 | -0.0291 | #N/A    |
| Psmd5   | -0.0754 | 0.015   | 0.0172  | -0.04   | -0.3297 | 0.0586  | 0.1304 | 0.1929  | 0.1478  | 0.2763  | #N/A    |
| Sar1b   | -0.1344 | 0.0057  | -0.0239 | 0.1522  | -0.0383 | 0.0142  | 0.128  | 0.055   | -0.0142 | -0.0201 | #N/A    |
| Ctsf    | 0.062   | -0.1394 | -0.0689 | -0.0765 | -0.1937 | 0.1139  | 0.1277 | 0.0016  | -0.0814 | -0.0756 | #N/A    |
| Klc4    | -0.1206 | -0.4238 | -0.4257 | -0.2358 | 0.3464  | 0.2008  | 0.1267 | -0.132  | 0.0545  | 0.2053  | #N/A    |
| Ube2j2  | -0.3016 | -0.3113 | -0.551  | 0.2304  | 0.1216  | 0.1472  | 0.1229 | 0.2094  | 0.1687  | 0.1046  | #N/A    |
| Uba6    | 0.0599  | -0.0905 | -0.1558 | -0.1304 | -0.7465 | -0.0015 | 0.1228 | 0.1594  | 0.1842  | 0.1882  | #N/A    |
| Cdc27   | 0.0229  | 0.1652  | 0.253   | 0.2223  | -0.3104 | 0.1072  | 0.1226 | 0.0887  | 0.0669  | 0.0907  | #N/A    |
| Atg7    | -0.0449 | -0.1162 | -0.0241 | -0.018  | 0.1319  | 0.1675  | 0.1163 | 0.1132  | -0.047  | -0.2099 | #N/A    |
| Uba2    | -0.0297 | -0.0345 | 0.0404  | 0.0333  | -0.1654 | 0.0561  | 0.113  | 0.1655  | 0.0293  | 0.1192  | #N/A    |
| Psmd6   | -0.0138 | 0.0683  | 0.137   | 0.258   | 0.0386  | 0.0824  | 0.1114 | 0.1343  | 0.1451  | 0.1502  | #N/A    |
| Smurf2  | -0.2218 | 0.0375  | 0.0789  | 0.0528  | -0.5034 | 0.1214  | 0.1047 | 0.1039  | 0.1659  | 0.1592  | #N/A    |
| Kif5b   | 0.2369  | 0.2542  | 0.2823  | 0.4086  | 0.6033  | 0.1606  | 0.1039 | 0.17    | 0.1952  | 0.0859  | #N/A    |
| Psmc3   | 0.0824  | 0.1007  | 0.1655  | 0.1264  | 0.267   | 0.1344  | 0.1015 | 0.1382  | 0.1136  | 0.1699  | #N/A    |
| Rictor  | 0.0652  | 0.0871  | 0.132   | 0.0036  | -0.7102 | -0.0015 | 0.1014 | 0.0712  | -0.0123 | -0.0581 | #N/A    |
| Prkg1   | 0.0554  | 0.1465  | -0.1111 | -0.2633 | -0.3222 | -0.1036 | 0.0973 | 0.1148  | 0.0779  | 0.1134  | #N/A    |
| Psmb6   | 0.059   | 0.0056  | 0.032   | 0.195   | 0.928   | 0.1073  | 0.0971 | 0.0891  | 0.1067  | 0.0966  | #N/A    |
| Pvr     | 0.3054  | 0.7595  | 0.9973  | 1.1678  | 0.7437  | 0.2526  | 0.097  | 0.0065  | 0.0873  | -0.0181 | Pvr     |
| Spsb4   | 0.4354  | 0.0625  | 0.4797  | 0.1075  | 0.9424  | 0.1686  | 0.0947 | 0.4297  | 0.3261  | -0.205  | #N/A    |
| Rnf6    | 0.112   | 0.158   | 0.2109  | 0.1309  | -0.2475 | 0.0621  | 0.094  | 0.1968  | 0.1437  | 0.2554  | #N/A    |
| Ube2u   | 0.1555  | 0.55    | -0.1867 | 0.1347  | 0.5414  | 0.7677  | 0.0924 | 0.6024  | 0.8174  | 0.8372  | #N/A    |
| Uba52   | 0.0634  | -0.0022 | 0.0663  | 0.1718  | 0.8394  | 0.2313  | 0.092  | 0.0729  | 0.0519  | -0.0345 | #N/A    |



|         |         |         |         |         |         |         |        |         |         |         |      |
|---------|---------|---------|---------|---------|---------|---------|--------|---------|---------|---------|------|
| Psm d9  | 0.2692  | 0.2192  | 0.2076  | 0.3044  | 0.4865  | 0.2949  | 0.0881 | 0.1224  | 0.1731  | 0.1504  | #N/A |
| Huwe1   | -0.0183 | 0.0714  | -0.029  | -0.1102 | -0.5159 | -0.0349 | 0.0838 | 0.1551  | 0.1009  | 0.17    | #N/A |
| Ap1m1   | -0.2083 | -0.2658 | -0.3073 | -0.1475 | -0.5618 | -0.0263 | 0.0828 | -0.1189 | -0.1703 | -0.2297 | #N/A |
| Rac1    | -0.0338 | 0.0959  | 0.0351  | 0.0131  | 0.169   | 0.1731  | 0.081  | -0.0058 | -0.0266 | -0.0069 | #N/A |
| Arf1    | -0.0031 | 0.0249  | -0.0116 | 0.0297  | -0.1103 | 0.0541  | 0.0772 | 0.0825  | 0.0009  | 0.0886  | #N/A |
| Klhl20  | -0.3655 | -0.0324 | -0.1032 | -0.1711 | -0.7384 | -0.0249 | 0.0717 | -0.0291 | -0.0382 | 0.0118  | #N/A |
| Psm d10 | 0.1517  | -0.0162 | -0.0584 | 0.0029  | -0.0845 | 0.0006  | 0.0703 | 0.115   | 0.2387  | 0.1624  | #N/A |
| Tpp2    | -0.0141 | 0.0891  | 0.0361  | 0.0117  | -0.152  | 0.0576  | 0.0696 | 0.0762  | 0.0122  | 0.1013  | #N/A |
| Psm f1  | 0.007   | 0.0831  | 0.0865  | 0.1225  | -0.071  | 0.0136  | 0.0695 | -0.0064 | -0.034  | 0.1127  | #N/A |
| Psm d2  | 0.0117  | -0.0671 | -0.0574 | 0.144   | 0.0324  | 0.0708  | 0.0673 | 0.0163  | -0.0205 | 0.0698  | #N/A |
| Uba1    | 0.0189  | -0.0061 | -0.0108 | -0.0349 | -0.035  | 0.0523  | 0.0672 | 0.0346  | 0.0302  | 0.1083  | #N/A |
| Sec24c  | -0.0008 | -0.081  | 0.0385  | 0.0959  | -0.1477 | -0.0703 | 0.0665 | 0.0092  | -0.1123 | -0.098  | #N/A |
| Rnf138  | -0.1351 | -0.1236 | 0.1996  | 0.1068  | -0.2526 | -0.1965 | 0.0647 | -0.1565 | -0.1228 | -0.2868 | #N/A |
| Anapc4  | -0.0755 | 0.051   | 0.0475  | 0.1018  | 0.0037  | 0.0768  | 0.0643 | 0.163   | 0.1676  | 0.1753  | #N/A |
| Cul1    | -0.0264 | 0.095   | 0.0512  | 0.0187  | -0.5105 | 0.0813  | 0.0639 | 0.1907  | 0.1569  | 0.1165  | #N/A |
| Psm a3  | 0.135   | 0.1543  | 0.2016  | 0.2613  | 0.6299  | 0.1184  | 0.0622 | 0.1164  | 0.1011  | -0.0251 | #N/A |
| Ubr1    | -0.1852 | -0.0196 | -0.1192 | -0.0854 | -0.6138 | -0.0831 | 0.062  | 0.1023  | 0.0706  | 0.054   | #N/A |
| Nfkbib  | 0.1749  | 0.1186  | 0.0213  | 0.2068  | 0.4085  | 0.1918  | 0.06   | -0.0344 | 0.076   | 0.1707  | #N/A |
| Itgav   | -0.0355 | 0.0963  | -0.0299 | -0.072  | -0.0127 | 0.1329  | 0.0576 | 0.0001  | -0.1683 | -0.1209 | #N/A |
| Raf1    | -0.0668 | -0.0584 | -0.0684 | -0.0219 | -0.3105 | 0.059   | 0.0572 | -0.0798 | 0.0265  | 0.0834  | #N/A |
| Foxo1   | -0.0881 | 0.0267  | -0.0975 | -0.2052 | -0.2147 | 0.0012  | 0.0562 | -0.0998 | 0.0097  | -0.0933 | #N/A |
| Asb3    | -0.0153 | -0.0325 | -0.1526 | -0.1666 | -0.4564 | -0.0072 | 0.0548 | 0.1427  | 0.0942  | -0.1024 | #N/A |
| Pik3r1  | 0.2878  | 0.0934  | 0.1236  | -0.0455 | -0.1833 | 0.0582  | 0.0532 | -0.0524 | -0.0908 | -0.0086 | #N/A |
| Anapc10 | -0.1972 | -0.0191 | -0.1167 | 0.0465  | -0.0212 | 0.1198  | 0.0528 | 0.3191  | 0.2421  | 0.1131  | #N/A |
| Psm d13 | 0.0275  | 0.0762  | -0.1483 | 0.0459  | 0.306   | 0.0663  | 0.0496 | -0.0051 | 0.0434  | 0.2261  | #N/A |
| Ube4a   | -0.1182 | -0.0878 | -0.0248 | 0.0212  | -0.3109 | -0.0027 | 0.0459 | 0.0593  | 0.0252  | -0.0639 | #N/A |
| Mtor    | -0.065  | -0.0176 | -0.0668 | -0.1465 | -0.4696 | -0.0702 | 0.0457 | 0.0686  | -0.0199 | 0.0394  | #N/A |
| Fbxo4   | -0.3018 | -0.1526 | 0.0472  | 0.3009  | 0.2117  | 0.1706  | 0.0452 | -0.2676 | -0.0505 | -0.0968 | #N/A |
| Ppp2r5a | -0.0298 | 0.2006  | 0.0693  | -0.0428 | -0.4164 | -0.0374 | 0.0446 | 0.2074  | 0.1371  | 0.1108  | #N/A |
| Hspa5   | 0.329   | 0.2614  | 0.1222  | 0.2767  | 0.1907  | 0.1906  | 0.0393 | 0.2479  | 0.0244  | -0.1611 | #N/A |
| Kif26a  | -0.0112 | -0.2482 | 0.1543  | 0.1723  | 0.6304  | 0.2938  | 0.038  | -0.3749 | -0.0712 | -0.3987 | #N/A |
| Socs1   | -0.2105 | -1.3025 | -1.3351 | 0.7175  | 1.4283  | 0.0432  | 0.0374 | -0.7251 | 0.143   | 0.1343  | #N/A |
| Dync1i2 | 0.1491  | 0.2504  | 0.1686  | 0.0384  | 0.4778  | 0.1887  | 0.0351 | 0.0574  | 0.0371  | -0.0158 | #N/A |
| Cul3    | 0.0198  | 0.2099  | 0.111   | 0.1192  | -0.4917 | 0.0779  | 0.0335 | 0.1419  | 0.1012  | 0.0437  | #N/A |
| Sec31a  | -0.0826 | -0.127  | -0.1113 | 0.0647  | -0.4014 | 0.032   | 0.0307 | 0.028   | -0.1261 | -0.0426 | #N/A |
| Psm a2  | 0.0285  | -0.0198 | 0.072   | 0.2756  | 0.4841  | 0.0698  | 0.0259 | 0.1503  | 0.1546  | 0.17    | #N/A |
| Fbxw8   | -0.043  | -0.0748 | -0.0812 | 0.1613  | 0.2203  | 0.0793  | 0.0255 | -0.007  | -0.1033 | -0.1925 | #N/A |
| Psm d12 | 0.052   | 0.0667  | 0.1615  | 0.2542  | 0.2214  | 0.1573  | 0.0229 | 0.139   | 0.2089  | 0.183   | #N/A |

|         |         |         |         |         |         |         |           |         |         |         |      |
|---------|---------|---------|---------|---------|---------|---------|-----------|---------|---------|---------|------|
| Dctn4   | -0.0275 | 0.1804  | 0.0902  | 0.0119  | -0.3276 | 0.0328  | 0.0221    | 0.0004  | -0.0495 | -0.0385 | #N/A |
| Dctn6   | -0.071  | -0.0832 | -0.0682 | -0.1375 | -0.257  | -0.0535 | 0.0217    | 0.0925  | 0.124   | 0.2762  | #N/A |
| Fbxo3   | -0.0202 | -0.0809 | -0.0938 | 0.012   | -0.4574 | -0.0159 | 0.0209    | 0.0441  | 0.0454  | 0.2424  | #N/A |
| Det1    | -0.4673 | -0.3569 | -0.4109 | 0.0542  | -0.2626 | 0.1282  | 0.0185    | -0.3357 | -0.4142 | -0.0191 | #N/A |
| Mapkap1 | 0.0284  | -0.1088 | -0.1522 | -0.1469 | -0.204  | 0.0134  | 0.0183    | -0.0059 | -0.0821 | -0.1291 | #N/A |
| Cdc16   | 0.0615  | 0.0407  | 0.0827  | 0.2077  | 0.1816  | 0.0905  | 0.018     | -0.0433 | -0.0282 | -0.0484 | #N/A |
| Klhl13  | -0.0774 | -0.1384 | -0.1852 | -0.0826 | -0.7589 | -0.02   | 0.0169    | 0.1112  | 0.1466  | 0.146   | #N/A |
| Fbxo2   | 0.0843  | 0.0191  | -0.1201 | -0.0885 | 0.4135  | 0.0922  | 0.0153    | -0.0229 | 0.2809  | 0.3122  | #N/A |
| Psmb7   | 0.2083  | 0.2503  | 0.2453  | 0.2345  | 0.7238  | 0.1395  | 0.0151    | 0.0971  | 0.0021  | 0.0733  | #N/A |
| Herc2   | -0.0094 | 0.0959  | -0.0731 | -0.2529 | -0.861  | -0.1265 | 0.0138    | 0.037   | -0.0445 | 0.0123  | #N/A |
| Uba3    | 0.0355  | 0.0929  | 0.0163  | 0.0118  | -0.3366 | 0.0752  | 0.0134    | 0.1589  | 0.1469  | 0.2002  | #N/A |
| Ap1g1   | -0.0587 | 0.0457  | -0.0239 | 0.0196  | -0.6317 | -0.0973 | 0.0116    | -0.0306 | -0.0673 | -0.0261 | #N/A |
| Cul5    | -0.161  | -0.0082 | 0.0087  | 0.0038  | -0.3064 | -0.063  | 0.0098    | 0.1066  | 0.0775  | 0.1243  | #N/A |
| Map3k7  | -0.0993 | 0.0775  | 0.028   | 0.0887  | -0.3758 | -0.0147 | 0.0091    | -0.1434 | -0.1484 | -0.1186 | #N/A |
| Ikbkg   | -0.117  | -0.0416 | -0.0377 | 0.0117  | -0.3504 | 0.0097  | 0.0055    | 0.0376  | 0.0078  | 0.146   | #N/A |
| Foxo3   | 0.0619  | -0.0357 | -0.1408 | -0.2152 | -1.711  | -0.2145 | 0.001     | -0.1376 | -0.2783 | -0.0928 | #N/A |
| Psmd14  | 0.0853  | 0.1283  | 0.0012  | 0.222   | 0.3312  | 0.0343  | 0.0003    | 0.1345  | 0.0342  | 0.084   | #N/A |
| Plcg1   | -0.0531 | -0.0921 | -0.2229 | -0.2841 | -0.6613 | -0.0766 | 1.443E-05 | -0.075  | -0.1864 | -0.2043 | #N/A |
| Raet1e  | 0       | 0       | 0       | 3.0404  | 0       | 0       | 0         | 0       | 0       | 3.3911  | #N/A |
| Cd207   | 0       | 0       | 2.2102  | 0       | 0       | 0       | 0         | 0       | 0       | 0       | #N/A |
| Kif2b   | 0       | 2.9576  | 0       | 3.1507  | 0       | 0       | 0         | 0       | 0       | 0       | #N/A |
| Asb17   | 0       | 0       | 0       | 0       | 0       | 0       | 0         | 0       | 0       | 0       | #N/A |
| Vprbp   | 0.0618  | -0.0549 | -0.0987 | -0.0294 | -0.3315 | -0.1266 | -0.0025   | 0.0605  | 0.1495  | 0.1477  | #N/A |
| PsmA5   | -0.1269 | -0.3265 | -0.3275 | 0.0804  | 0.1857  | -0.0385 | -0.0043   | 0.0006  | 0.0483  | 0.1024  | #N/A |
| Psmc6   | 0.0674  | 0.1381  | 0.161   | 0.2537  | 0.0282  | 0.0398  | -0.0082   | 0.1764  | 0.1321  | 0.0117  | #N/A |
| Klhl9   | -0.2012 | -0.0498 | -0.1527 | -0.0979 | -0.572  | -0.0922 | -0.012    | -0.0192 | 0.0115  | -0.0834 | #N/A |
| Psmc5   | 0.2136  | 0.2341  | 0.2648  | 0.1216  | 0.079   | -0.0608 | -0.0124   | 0.027   | 0.0839  | 0.1534  | #N/A |
| Sec24b  | -0.0351 | -0.0202 | -0.0454 | 0.0118  | -0.2967 | 0.0182  | -0.0136   | -0.0534 | -0.136  | -0.2533 | #N/A |
| Dctn1   | 0.0123  | -0.1099 | -0.1282 | -0.1272 | -0.1488 | -0.0969 | -0.0139   | 0.0315  | -0.0191 | 0.0589  | #N/A |
| Akt1    | -0.0447 | -0.1288 | -0.0463 | -0.0348 | -0.2168 | -0.0397 | -0.0146   | -0.053  | -0.1506 | -0.0786 | #N/A |
| Ube2e1  | 0.1519  | 0.1397  | 0.1185  | 0.0339  | -0.4119 | 0.0176  | -0.0149   | 0.1728  | 0.1179  | 0.0762  | #N/A |
| Psmd1   | 0.0266  | 0.1072  | 0.0247  | 0.1783  | 0.7024  | 0.1166  | -0.0217   | 0.0331  | -0.0008 | 0.0888  | #N/A |
| Hectd3  | -0.0009 | -0.15   | -0.1941 | -0.1217 | 0.0329  | 0.0341  | -0.0221   | 0.0546  | 0.036   | 0.0913  | #N/A |
| Enah    | 0.1404  | 0.2504  | 0.1959  | -0.0271 | -0.3824 | -0.0752 | -0.029    | -0.0194 | 0.0236  | 0.0897  | #N/A |
| Ube2d3  | -0.0058 | 0.1146  | 0.0208  | 0.1404  | -0.1562 | -0.0323 | -0.0313   | 0.0864  | 0.0787  | 0.155   | #N/A |
| Ap1b1   | 0.0487  | -0.0086 | 0.0462  | -0.0286 | -0.2656 | -0.1349 | -0.0338   | -0.0527 | -0.085  | 0.0071  | #N/A |
| Fyn     | -0.0505 | 0.0499  | -0.044  | -0.0358 | -0.1627 | 0.1586  | -0.035    | -0.0985 | -0.2164 | -0.208  | #N/A |
| Pik3cb  | -0.1451 | 0.0113  | -0.1431 | -0.0396 | -0.5349 | -0.1518 | -0.035    | -0.1407 | -0.086  | -0.0318 | #N/A |

|          |         |         |         |         |         |         |         |         |         |         |      |
|----------|---------|---------|---------|---------|---------|---------|---------|---------|---------|---------|------|
| Blmh     | -0.0277 | 0.0348  | -0.0407 | -0.0186 | 0.0981  | -0.0573 | -0.0357 | 0.006   | 0.0312  | 0.119   | #N/A |
| Psemb4   | -0.0414 | -0.066  | -0.1401 | 0.1108  | 0.5538  | -0.0098 | -0.0409 | 0.0862  | 0.1337  | 0.3152  | #N/A |
| Fbxo6    | -0.2886 | -0.2441 | 0.0653  | 0.048   | 0.1245  | -0.0594 | -0.0415 | -0.2172 | 0.0584  | -0.239  | #N/A |
| Rbck1    | -0.2084 | -0.3815 | -0.2673 | -0.2765 | -0.2847 | -0.0461 | -0.0417 | -0.2084 | -0.1782 | -0.1432 | #N/A |
| Bad      | 0.0295  | -0.2879 | -0.1752 | 0.0075  | 0.548   | -0.1158 | -0.0424 | -0.1872 | 0.0602  | -0.0456 | #N/A |
| Ube2z    | 0.0112  | -0.0605 | -0.0462 | 0.0662  | 0.015   | -0.1669 | -0.0437 | -0.1024 | -0.1488 | -0.0177 | #N/A |
| Arih2    | 0.1156  | 0.258   | 0.2359  | 0.2353  | -0.2399 | 0.0788  | -0.0439 | -0.033  | -0.0409 | 0.1016  | #N/A |
| Kir3dl2  | 0.7174  | 0.9441  | -0.8059 | 0.6112  | 1.2618  | 0.6543  | -0.047  | 1.0734  | 1.3365  | 1.6618  | #N/A |
| Chuk     | -0.1367 | 0.2676  | 0.2442  | 0.2323  | -0.3123 | -0.0199 | -0.0471 | -0.0782 | -0.0523 | -0.1714 | #N/A |
| Cd3d     | 0.3111  | 0.2187  | 0.2934  | -0.2194 | 0.4783  | -0.7863 | -0.0476 | -0.3926 | -0.1425 | 0.1505  | #N/A |
| Lrsam1   | -0.0913 | -0.2344 | -0.2507 | -0.1021 | -0.0475 | -0.1032 | -0.048  | -0.1158 | -0.0656 | -0.1621 | #N/A |
| Park2    | -0.0597 | -0.0393 | 0.0182  | -0.1915 | -0.4041 | -0.285  | -0.0499 | -0.2585 | -0.0535 | -0.2437 | #N/A |
| Pja1     | 0.0696  | -0.0267 | 0.0241  | -0.1195 | -0.5126 | -0.1696 | -0.0503 | 0.0701  | 0.0829  | 0.2108  | #N/A |
| Anapc5   | 0.0153  | 0.0753  | -0.0656 | -0.1939 | -0.0544 | 0.0209  | -0.0511 | 0.0358  | -0.0746 | 0.0536  | #N/A |
| Ube2r2   | 0.0652  | 0.1286  | 0.1016  | 0.0582  | 0.6444  | 0.0413  | -0.0515 | -0.0354 | -0.028  | 0.1066  | #N/A |
| Psmc1    | 0.1196  | 0.1635  | 0.1181  | 0.1628  | 0.6296  | 0.0134  | -0.0554 | 0.0848  | 0.0409  | 0.1024  | #N/A |
| Sec23a   | -0.129  | 0.015   | -0.0376 | -0.1487 | -0.9349 | -0.1743 | -0.0591 | -0.0212 | -0.0448 | -0.0263 | #N/A |
| Rnf34    | 0.0742  | 0.1061  | 0.1406  | -0.0846 | -0.2948 | -0.0778 | -0.061  | 0.046   | 0.1231  | 0.1765  | #N/A |
| Psma7    | 0.0336  | -0.0451 | -0.0106 | 0.0813  | 1.1516  | 0.0399  | -0.0624 | 0.052   | 0.0744  | 0.0484  | #N/A |
| Psmd11   | 0.0016  | -0.0469 | -0.0127 | 0.2396  | 0.801   | -0.0695 | -0.0624 | -0.0613 | -0.1404 | -0.1187 | #N/A |
| Dync1li2 | 0.0137  | 0.0733  | 0.056   | 0.0138  | -0.4794 | -0.1694 | -0.063  | -0.0349 | -0.0172 | 0.0964  | #N/A |
| Creb1    | -0.1335 | -0.1209 | -0.1018 | -0.0676 | -0.0744 | -0.0454 | -0.0634 | 0.0176  | 0.0165  | 0.0741  | #N/A |
| Wsb1     | -0.2134 | 0.0198  | -0.0146 | 0.0292  | -0.3441 | 0.1553  | -0.0669 | 0.0082  | -0.0153 | -0.0618 | #N/A |
| Dynll2   | 0.126   | 0.0582  | -0.0089 | -0.0588 | -0.2753 | -0.1764 | -0.0678 | -0.1515 | 0.0819  | 0.1392  | #N/A |
| Fbxw11   | -0.0395 | 0.0987  | 0.072   | 0.0745  | -0.4819 | -0.1054 | -0.0698 | -0.0682 | -0.0575 | 0.0398  | #N/A |
| Ube2d1   | -0.002  | -0.0166 | 0.0248  | -0.0594 | -0.1743 | 0.033   | -0.0726 | 0.0002  | -0.0143 | -0.0804 | #N/A |
| Rnf123   | -0.0824 | -0.2081 | -0.2239 | -0.2597 | -0.5074 | -0.1971 | -0.0761 | -0.0007 | -0.1998 | 0.0344  | #N/A |
| Kras     | 0.0462  | 0.1109  | 0.0463  | 0.121   | -0.1894 | -0.0705 | -0.0763 | 0.0094  | -0.0248 | 0.0739  | #N/A |
| Keap1    | -0.0332 | -0.159  | -0.1066 | -0.0346 | 0.4067  | 0.0128  | -0.0775 | -0.1382 | -0.0391 | -0.0624 | #N/A |
| Dctn5    | -0.0471 | -0.0325 | -0.1255 | -0.0274 | -0.1235 | -0.0265 | -0.0815 | -0.0891 | -0.2261 | -0.1626 | #N/A |
| Ube2v2   | 0.1656  | 0.0986  | 0.1136  | -0.0049 | -0.4946 | -0.195  | -0.0826 | 0.0908  | 0.1534  | 0.0121  | #N/A |
| Trim11   | -0.0819 | -0.0452 | -0.0277 | -0.211  | 0.2652  | -0.0427 | -0.0852 | -0.1125 | -0.1513 | 0.015   | #N/A |
| Uba5     | 0.0533  | 0.1373  | 0.1948  | 0.2409  | 0.2683  | -0.0386 | -0.0854 | 0.0086  | 0.0203  | -0.0178 | #N/A |
| Psmc4    | 0.077   | 0.031   | 0.0514  | 0.1759  | 0.5456  | 0.0636  | -0.0887 | 0.0055  | -0.0126 | 0.0818  | #N/A |
| Cdc42    | 0.0165  | 0.0605  | -0.0303 | -0.0367 | 0.0552  | -0.093  | -0.0921 | -0.0046 | -0.0672 | 0.0797  | #N/A |
| Psemb3   | 0.0983  | -0.0691 | -0.0797 | 0.2503  | 1.0023  | 0.0583  | -0.0923 | -0.1316 | -0.0083 | -0.0239 | #N/A |
| Ube3c    | -0.0215 | 0.129   | 0.0704  | 0.0305  | -0.5811 | -0.0881 | -0.0927 | 0.0012  | -0.0607 | -0.0332 | #N/A |
| Calr     | 0.1147  | -0.0476 | -0.3208 | -0.127  | 0.4465  | 0.1858  | -0.0948 | -0.0692 | -0.161  | -0.05   | #N/A |

|         |         |         |         |         |         |         |         |         |         |           |      |
|---------|---------|---------|---------|---------|---------|---------|---------|---------|---------|-----------|------|
| Ppp2ca  | 0.0028  | 0.1012  | 0.0332  | -0.1332 | -0.3209 | -0.1349 | -0.0966 | -0.0092 | -0.037  | -0.0101   | #N/A |
| Psmb2   | -0.049  | -0.2104 | -0.1684 | 0.1747  | 0.5407  | -0.0081 | -0.0988 | -0.1109 | -0.1791 | -0.0876   | #N/A |
| Tsc2    | -0.1016 | -0.1027 | -0.1237 | -0.177  | -0.2205 | -0.1759 | -0.1003 | -0.1733 | -0.2762 | -0.2549   | #N/A |
| Lrrc41  | -0.0679 | -0.0667 | -0.0724 | 0.1246  | -0.4663 | -0.2002 | -0.1006 | -0.2689 | -0.0598 | -0.0849   | #N/A |
| Ap2a1   | -0.0621 | -0.2171 | -0.2715 | -0.2063 | -0.4939 | -0.1805 | -0.1013 | -0.1213 | -0.1939 | -0.2298   | #N/A |
| Akt2    | -0.0848 | -0.0641 | -0.2288 | -0.1609 | 0.131   | -0.1044 | -0.1015 | -0.197  | -0.2316 | -0.1028   | #N/A |
| Rnf4    | -0.0484 | 0.1057  | 0.1421  | 0.224   | -0.3902 | -0.2585 | -0.1015 | -0.1645 | -0.1442 | 0.0352    | #N/A |
| Ube2h   | 0.0563  | 0.1109  | 0.1717  | 0.0529  | -0.2009 | -0.0829 | -0.104  | -0.0704 | -0.0613 | 0.039     | #N/A |
| Psmb1   | 0.0832  | -0.0412 | 0.062   | 0.1062  | 0.8215  | 0.0766  | -0.1048 | 0.0796  | 0.1013  | 0.1821    | #N/A |
| Sae1    | 0.0237  | 0.0109  | -0.0253 | -0.078  | 0.3027  | -0.0709 | -0.1048 | -0.0403 | -0.0924 | 0.0557    | #N/A |
| Actr1a  | 0.0142  | -0.0171 | 0.0081  | -0.0678 | -0.3296 | -0.127  | -0.107  | -0.0541 | -0.1463 | 2.885E-05 | #N/A |
| Rnf25   | 0.0034  | 0.1254  | 0.0385  | -0.0588 | 0.0878  | 0.0598  | -0.1077 | 0.0203  | -0.0131 | -0.0041   | #N/A |
| Kif3b   | -0.0373 | 0.004   | -0.0884 | -0.1621 | -0.6459 | -0.1486 | -0.1098 | -0.0339 | -0.154  | 0.1265    | #N/A |
| Ube2s   | 0.1178  | 0.0872  | 0.1312  | 0.1691  | 0.7316  | -0.0427 | -0.11   | -0.0982 | -0.0274 | -0.1509   | #N/A |
| Casp9   | -0.0077 | -0.0165 | -0.0406 | -0.1684 | -0.0434 | -0.2426 | -0.1139 | -0.2262 | -0.1792 | -0.1329   | #N/A |
| Pja2    | -0.0661 | 0.0105  | -0.113  | -0.3268 | -0.9012 | -0.2757 | -0.115  | 0.0451  | -0.0157 | 0.0471    | #N/A |
| Evl     | -0.0738 | -0.0164 | -0.0298 | -0.2066 | -0.2353 | -0.2183 | -0.1192 | -0.217  | -0.2707 | -0.2461   | #N/A |
| Dzip3   | 0.0103  | -0.0009 | -0.1541 | -0.0875 | -0.2057 | -0.1898 | -0.1194 | 0.0958  | 0.1343  | 0.1641    | #N/A |
| Ube2n   | 0.0071  | 0.0771  | -0.0056 | -0.0916 | -0.2677 | -0.1667 | -0.1201 | -0.0476 | -0.0426 | -0.0365   | #N/A |
| Asb13   | -0.037  | 0.0383  | -0.0189 | -0.1649 | -0.3035 | -0.2383 | -0.1233 | -0.1662 | -0.1767 | -0.1182   | #N/A |
| Mkm1    | 0.0509  | 0.1032  | 0.0776  | -0.0854 | -0.2999 | -0.1667 | -0.1274 | -0.062  | -0.1386 | 0.0296    | #N/A |
| Ppp2r5b | -0.0051 | 0.0598  | -0.0364 | -0.161  | -0.1131 | -0.2205 | -0.1289 | -0.1682 | -0.1746 | -0.0631   | #N/A |
| Ube2q2  | -0.0131 | 0.05    | 0.0451  | -0.0857 | -0.5833 | -0.1663 | -0.1307 | 0.0494  | 0.1061  | 0.1381    | #N/A |
| Anapc11 | 0.0608  | -0.0931 | -0.1206 | 0.0071  | 0.6594  | -0.0256 | -0.1358 | -0.0394 | -0.0309 | -0.0985   | #N/A |
| Rnf41   | 0.0173  | -0.0148 | -0.075  | -0.1262 | -0.2111 | -0.1505 | -0.1371 | -0.1202 | -0.0948 | -0.0754   | #N/A |
| Asb8    | 0.0065  | -0.1906 | -0.1353 | -0.1422 | 0.2384  | -0.137  | -0.1383 | -0.1511 | -0.1087 | 0.0576    | #N/A |
| Pten    | -0.0167 | 0.0925  | -0.0181 | -0.0705 | -0.5328 | -0.1853 | -0.1407 | -0.1289 | -0.1817 | -0.1522   | #N/A |
| Psm4    | -0.1027 | -0.1375 | -0.1628 | 0.0018  | 0.8354  | -0.0148 | -0.1443 | 0.009   | 0.0564  | 0.0799    | #N/A |
| Kif2a   | -0.0219 | -0.0022 | -0.0926 | -0.0458 | -0.1641 | -0.1333 | -0.145  | -0.0741 | -0.082  | -0.1587   | #N/A |
| Sh3gl2  | 0.0991  | 0.2009  | 0.2899  | 0.0403  | -0.5559 | -0.2359 | -0.1465 | -0.1784 | -0.1667 | -0.2103   | #N/A |
| Them4   | 0.0314  | -0.2063 | -0.2688 | -0.0326 | 0.0959  | -0.1449 | -0.149  | -0.0188 | 0.0025  | -0.0104   | #N/A |
| Cul2    | -0.0296 | -0.1122 | -0.1155 | -0.0679 | -0.4655 | -0.1233 | -0.1537 | -0.0577 | -0.0502 | -0.1956   | #N/A |
| Psm7    | 0.0065  | -0.0325 | -0.0708 | 0.1263  | 0.4344  | -0.0039 | -0.1549 | -0.0481 | 0.0047  | 0.1064    | #N/A |
| Ube2j1  | -0.0912 | 0.0731  | 0.0803  | -0.0821 | -0.6261 | -0.1858 | -0.1551 | -0.0689 | -0.166  | -0.0744   | #N/A |
| Asb7    | -0.147  | -0.1335 | -0.0055 | 0.047   | -0.2357 | -0.0846 | -0.1568 | -0.1977 | -0.2821 | -0.0774   | #N/A |
| Sec61g  | 0.1283  | 0.1562  | 0.2035  | 0.3675  | 1.3783  | 0.2382  | -0.1621 | 0.0768  | 0.0286  | 0.2434    | #N/A |
| Stim1   | -0.0599 | -0.1206 | -0.1213 | -0.2789 | -0.466  | -0.1932 | -0.165  | -0.144  | -0.1905 | -0.0526   | #N/A |
| Ppp2r5e | -0.1038 | -0.023  | -0.1258 | -0.1202 | -0.5457 | -0.2016 | -0.1666 | -0.0684 | -0.1011 | -0.0814   | #N/A |

|         |         |         |         |         |         |         |         |         |         |         |       |
|---------|---------|---------|---------|---------|---------|---------|---------|---------|---------|---------|-------|
| Ube2w   | 0.0575  | 0.0245  | -0.0383 | -0.0684 | -0.4092 | -0.1023 | -0.1689 | 0.1637  | 0.0322  | 0.1039  | #N/A  |
| Cdc34   | -0.0998 | -0.2107 | -0.0632 | 0.1256  | 0.4897  | -0.1507 | -0.169  | -0.1857 | -0.0976 | -0.0208 | #N/A  |
| Btrc    | 0.0073  | -0.0528 | -0.1193 | -0.2321 | -0.62   | -0.2936 | -0.1694 | -0.0245 | -0.1157 | 0.0182  | #N/A  |
| Klc1    | -0.003  | -0.0446 | -0.1109 | -0.1239 | -0.4974 | -0.2012 | -0.1765 | -0.02   | -0.0448 | 0.2293  | #N/A  |
| Ap2m1   | 0.0499  | 0.107   | 0.1199  | -0.0338 | -0.1723 | -0.2224 | -0.1784 | -0.1013 | -0.1552 | -0.0061 | #N/A  |
| Ube2q1  | 0.0002  | -0.0424 | -0.023  | -0.1385 | -0.1452 | -0.1229 | -0.1839 | -0.1191 | -0.0991 | -0.1629 | #N/A  |
| Ap2s1   | 0.0459  | 0.2181  | 0.0375  | -0.1096 | 0.7598  | -0.0653 | -0.1895 | -0.1623 | -0.1805 | -0.2699 | #N/A  |
| Dctn2   | 0.0367  | 0.0143  | 0.001   | -0.053  | 0.1894  | -0.0943 | -0.1901 | -0.0229 | -0.1058 | -0.0577 | #N/A  |
| Ube2g2  | 0.18    | 0.2996  | 0.4083  | 0.2111  | -0.0369 | -0.1942 | -0.192  | -0.1546 | -0.1538 | 0.0852  | #N/A  |
| Tceb1   | 0.0499  | 0.15    | 0.0878  | -0.0826 | -0.1952 | -0.1544 | -0.1926 | 0.0026  | -0.0367 | 0.0615  | #N/A  |
| Pdpk1   | -0.0499 | 0.0584  | -0.0323 | -0.2407 | -0.9029 | -0.3415 | -0.1938 | -0.1298 | -0.1981 | -0.2198 | #N/A  |
| Psmd8   | 0.0635  | 0.0081  | 0.0072  | -0.0961 | 0.2599  | -0.0851 | -0.196  | -0.2053 | -0.2213 | -0.3167 | #N/A  |
| Vhl     | 0.0556  | 0.1177  | 0.0184  | -0.0783 | -0.0582 | -0.1452 | -0.1987 | -0.1346 | -0.2904 | 0.062   | #N/A  |
| Ube2k   | 0.0152  | -0.0019 | -0.0632 | -0.0639 | -0.1711 | -0.1697 | -0.2053 | -0.0569 | -0.0969 | -0.026  | #N/A  |
| Smurf1  | -0.0152 | 0.0039  | -0.0687 | -0.1078 | -0.6162 | -0.2374 | -0.2071 | -0.2033 | -0.2679 | -0.3417 | #N/A  |
| Osbpl1a | -0.0929 | -0.0564 | -0.1367 | -0.3714 | -0.6573 | -0.3697 | -0.219  | -0.0589 | -0.1808 | 0.0846  | #N/A  |
| Psmd3   | -0.1288 | -0.1886 | -0.3314 | 0.108   | 0.1152  | -0.1694 | -0.2233 | -0.2143 | -0.1795 | -0.1699 | #N/A  |
| MIst8   | -0.0736 | 0.051   | -0.0431 | -0.217  | -0.4431 | -0.3355 | -0.2288 | -0.1956 | -0.3058 | -0.1964 | #N/A  |
| Ap2b1   | -0.0353 | 0.001   | -0.1683 | -0.3204 | -0.7349 | -0.4006 | -0.2327 | -0.2058 | -0.3001 | -0.2629 | #N/A  |
| Ppp2r5c | -0.0854 | 0.0686  | -0.0296 | -0.1847 | -0.4516 | -0.2921 | -0.2378 | -0.1411 | -0.2178 | -0.1658 | #N/A  |
| Prkacb  | -0.171  | -0.1216 | -0.2658 | -0.3382 | -1.2216 | -0.299  | -0.2385 | -0.0788 | -0.1553 | -0.0222 | #N/A  |
| Ube2o   | -0.0667 | -0.1585 | -0.2223 | -0.2658 | -0.3327 | -0.3233 | -0.2392 | -0.1821 | -0.2093 | -0.1872 | #N/A  |
| Nr4a1   | 1.0704  | 0.2239  | -0.0814 | -0.4506 | -0.7038 | -0.3898 | -0.2403 | -0.1203 | 0.4267  | 0.9167  | Nr4a1 |
| Calm2   | -0.0231 | 0.0145  | -0.1395 | -0.4467 | -0.375  | -0.1833 | -0.2411 | 0.0624  | -0.0193 | 0.1003  | #N/A  |
| Pik3r2  | -0.1418 | -0.1413 | -0.2466 | -0.2488 | -0.3392 | -0.2419 | -0.2446 | -0.1374 | -0.2608 | -0.1065 | #N/A  |
| Trim32  | -0.1648 | -0.1496 | -0.2076 | -0.374  | -0.7865 | -0.2872 | -0.2515 | -0.1021 | -0.13   | -0.0673 | #N/A  |
| Stub1   | -0.0135 | -0.1894 | -0.2109 | -0.1438 | 0.0335  | -0.1469 | -0.2595 | -0.1587 | -0.0965 | 0.076   | #N/A  |
| Dnm1    | -0.0598 | -0.114  | -0.1535 | -0.3991 | -0.7595 | -0.2902 | -0.2606 | -0.1594 | -0.2487 | -0.0631 | #N/A  |
| Asb16   | -0.5856 | 0.1383  | -0.133  | -0.5297 | -0.5955 | -0.1473 | -0.2607 | 0.7965  | 0.9555  | 0.325   | #N/A  |
| Ppp2r5d | -0.0466 | 0.0086  | 0.1197  | -0.0684 | -0.1471 | -0.2798 | -0.2637 | -0.2815 | -0.2751 | -0.2769 | #N/A  |
| Dctn3   | 0.0855  | -0.0562 | 0.0296  | -0.0075 | 0.2358  | -0.218  | -0.2643 | -0.1162 | -0.2124 | -0.1555 | #N/A  |
| Zap70   | -0.0196 | 0.2095  | -0.4348 | -0.7114 | 0.2475  | -0.6123 | -0.2656 | -0.2438 | -0.0188 | -0.0426 | #N/A  |
| Ube2b   | 0.0038  | 0.0055  | -0.0609 | -0.1824 | -0.3555 | -0.3232 | -0.267  | -0.1614 | -0.0635 | -0.0193 | #N/A  |
| Kifap3  | 0.0081  | -0.0014 | -0.1216 | -0.334  | -0.0579 | -0.2792 | -0.268  | -0.125  | -0.1945 | -0.1486 | #N/A  |
| Rnf220  | -0.1646 | -0.2336 | -0.2778 | -0.2463 | -0.4394 | -0.2763 | -0.2692 | -0.2216 | -0.1984 | -0.1527 | #N/A  |
| Ube2g1  | -0.1338 | -0.0421 | -0.0594 | -0.0556 | -0.5825 | -0.2366 | -0.2769 | -0.1629 | -0.1902 | -0.2374 | #N/A  |
| Ube2a   | -0.0457 | -0.1365 | -0.2065 | -0.22   | -0.3808 | -0.2532 | -0.2778 | -0.1892 | -0.2588 | -0.1866 | #N/A  |
| Tceb2   | 0.0967  | -0.0019 | 0.0834  | 0.0952  | 1.0314  | 0.0263  | -0.2821 | -0.0578 | -0.035  | -0.023  | #N/A  |

|         |         |         |         |         |         |         |         |         |         |         |        |
|---------|---------|---------|---------|---------|---------|---------|---------|---------|---------|---------|--------|
| Dync1i1 | 0.0267  | 0.0073  | -0.026  | -0.1886 | -0.2431 | -0.3357 | -0.284  | -0.1424 | -0.1244 | -0.0204 | #N/A   |
| Ppp2cb  | -0.0532 | 0.0524  | -0.0231 | -0.0878 | -0.263  | -0.1911 | -0.2912 | -0.1421 | -0.1146 | -0.1555 | #N/A   |
| Pak1    | -0.0266 | 0.0379  | -0.095  | -0.3288 | -0.6091 | -0.3648 | -0.293  | -0.134  | -0.253  | -0.1024 | #N/A   |
| Ragef4  | 0.0988  | 0.3057  | 0.3007  | 0.0802  | -0.9114 | -0.4037 | -0.2938 | -0.0333 | -0.3485 | 0.0733  | #N/A   |
| Psmb5   | -0.072  | -0.2791 | -0.3245 | -0.0404 | 0.2718  | -0.2405 | -0.3009 | -0.1312 | -0.2864 | -0.1295 | #N/A   |
| Ube2e3  | -0.0985 | 0.0034  | -0.0362 | -0.0893 | -0.2716 | -0.2141 | -0.3024 | -0.2224 | -0.124  | -0.2996 | #N/A   |
| Ube3b   | -0.131  | -0.0901 | -0.1116 | -0.1226 | -0.6643 | -0.3724 | -0.3057 | -0.3112 | -0.4854 | -0.2566 | #N/A   |
| Crtam   | 0.3595  | 0.7744  | -0.1645 | 2.4895  | 0.9082  | -0.2678 | -0.3141 | -1.5966 | 0.5176  | -0.267  | #N/A   |
| Ppp2r1a | 0.0095  | -0.0955 | -0.1653 | -0.1959 | -0.1258 | -0.3294 | -0.3143 | -0.1904 | -0.2024 | 0.366   | #N/A   |
| Prkaca  | -0.0372 | -0.1909 | -0.2318 | -0.2076 | -0.4747 | -0.3737 | -0.3162 | -0.2343 | -0.2668 | -0.2459 | #N/A   |
| Cxadr   | 0.1399  | 0.5654  | 0.5832  | 0.0521  | -0.4679 | -0.3264 | -0.3185 | -0.4464 | -0.2412 | -0.2616 | #N/A   |
| Asb1    | -0.1479 | -0.1705 | -0.1402 | -0.2366 | -0.6766 | -0.4615 | -0.3216 | -0.1823 | -0.2338 | -0.1932 | #N/A   |
| Ap2a2   | -0.0823 | -0.1298 | -0.1526 | -0.2047 | -0.3131 | -0.3298 | -0.3254 | -0.2999 | -0.3209 | -0.286  | #N/A   |
| Grb2    | 0.0168  | -0.0152 | -0.0421 | -0.1772 | -0.1066 | -0.3826 | -0.3284 | -0.3767 | -0.3794 | -0.3095 | #N/A   |
| Npepps  | -0.0263 | -0.0272 | -0.1644 | -0.1605 | 0.0985  | -0.297  | -0.3332 | -0.2994 | -0.3083 | -0.3847 | #N/A   |
| Trim37  | -0.0992 | 0.0684  | -0.1197 | -0.4094 | -1.0778 | -0.4781 | -0.3353 | -0.1624 | -0.2888 | -0.2177 | #N/A   |
| Rbx1    | -0.117  | -0.2344 | -0.2445 | -0.0732 | 0.0136  | -0.3288 | -0.3398 | -0.221  | -0.2291 | -0.2529 | #N/A   |
| Akt3    | -0.2181 | -0.0165 | -0.2217 | -0.4044 | -1.0856 | -0.5043 | -0.3503 | -0.1723 | -0.2924 | -0.292  | #N/A   |
| Akt1s1  | -0.2696 | -0.4461 | -0.5251 | -0.1394 | 0.0612  | -0.1911 | -0.3528 | -0.3858 | -0.2403 | -0.0202 | #N/A   |
| Cdkn1a  | 1.1811  | 1.7311  | 1.641   | 2.1773  | 1.5199  | 0.3539  | -0.3531 | -0.5891 | -0.5845 | -0.5515 | Cdkn1a |
| Rnf182  | 0.0484  | 0.1319  | 0.1811  | -0.1534 | 0.263   | -0.1704 | -0.3537 | -0.3241 | -0.1788 | -0.1894 | #N/A   |
| Rap1gap | -0.0664 | -0.11   | -0.0828 | -0.3584 | -0.715  | -0.3376 | -0.3547 | -0.3833 | -0.3812 | -0.3607 | #N/A   |
| Zbtb16  | 0.719   | 0.8032  | 0.3527  | 0.4714  | -0.0431 | -0.3574 | -0.3704 | -0.1961 | -0.2133 | -0.1365 | Zbtb16 |
| Cd4     | -0.8405 | -1.0117 | -1.5877 | -2.9474 | -2.3622 | -0.6532 | -0.3728 | -0.9612 | -0.6964 | -1.0381 | Cd4    |
| Kif5a   | 0.046   | 0.1923  | 0.1622  | 0.1006  | -0.6674 | -0.523  | -0.3739 | -0.1362 | -0.2835 | 0.0444  | #N/A   |
| Ywhab   | -0.0546 | -0.0296 | -0.092  | -0.175  | -0.1669 | -0.339  | -0.376  | -0.2488 | -0.2923 | -0.2652 | #N/A   |
| Calm3   | -0.0326 | -0.0692 | -0.1542 | -0.4157 | -0.1913 | -0.4526 | -0.3792 | -0.2299 | -0.2442 | -0.0611 | #N/A   |
| Ywhaz   | -0.1104 | -0.1263 | -0.3351 | -0.3412 | -0.4476 | -0.4518 | -0.3847 | -0.2855 | -0.3501 | -0.141  | #N/A   |
| Ube2m   | 0.0247  | -0.0853 | -0.058  | -0.0003 | 0.2632  | -0.3562 | -0.3867 | -0.3241 | -0.3235 | -0.3163 | #N/A   |
| Fbxo44  | 0.0353  | -0.0732 | -0.0226 | -0.1415 | 0.1937  | -0.2657 | -0.3924 | -0.189  | -0.2816 | -0.2532 | #N/A   |
| Gsk3a   | -0.1166 | -0.1129 | -0.1396 | -0.2624 | -0.4361 | -0.4524 | -0.394  | -0.35   | -0.3193 | -0.2217 | #N/A   |
| Ube2e2  | -0.017  | -0.0716 | -0.1671 | -0.3551 | -0.3309 | -0.4569 | -0.3946 | -0.2303 | -0.3175 | -0.0678 | #N/A   |
| Klc2    | -0.0813 | -0.3429 | -0.4008 | -0.4189 | -0.5316 | -0.4707 | -0.3974 | -0.1923 | -0.2195 | -0.0314 | #N/A   |
| Ap1s1   | -0.0012 | -0.0206 | -0.1997 | -0.2407 | 0.0165  | -0.3382 | -0.4064 | -0.255  | -0.3254 | 0.2422  | #N/A   |
| Kif3c   | -0.1193 | -0.1649 | -0.2378 | -0.2955 | -0.9738 | -0.4739 | -0.4069 | -0.3118 | -0.3803 | -0.2585 | #N/A   |
| Asb6    | 0.0072  | -0.2185 | -0.1466 | -0.0192 | -0.1645 | -0.3494 | -0.4075 | -0.3432 | -0.3296 | -0.35   | #N/A   |
| Calm1   | -0.0021 | 0.0531  | -0.0815 | -0.3136 | -0.3869 | -0.449  | -0.4155 | -0.2536 | -0.3661 | -0.2158 | #N/A   |
| Prkcb   | -0.1078 | -0.0503 | -0.2218 | -0.5834 | -0.8916 | -0.6087 | -0.4173 | -0.3761 | -0.4962 | -0.3699 | Prkcb  |

|          |         |         |         |         |         |         |         |         |         |         |         |
|----------|---------|---------|---------|---------|---------|---------|---------|---------|---------|---------|---------|
| Fbxw7    | 0.0556  | -0.1774 | -0.371  | -0.4329 | -0.4399 | -0.4483 | -0.4252 | -0.2701 | -0.3758 | -0.139  | #N/A    |
| Rasgrp1  | -0.1237 | 0.0226  | -0.0881 | -0.4521 | -1.0014 | -0.5046 | -0.4288 | -0.3923 | -0.5837 | -0.4176 | #N/A    |
| Asb11    | -0.4247 | -0.1243 | -0.4723 | -0.5482 | -0.1636 | -0.3834 | -0.4527 | -0.1993 | -0.3008 | 0.0229  | #N/A    |
| Src      | -0.0701 | -0.0588 | -0.0515 | -0.1433 | -0.3246 | -0.4111 | -0.4582 | -0.3902 | -0.4517 | -0.3101 | #N/A    |
| Ubox5    | -0.265  | -0.2326 | -0.1824 | -0.2981 | -1.0064 | -0.6594 | -0.486  | -0.4328 | -0.6462 | -0.6727 | #N/A    |
| Hras     | -0.0208 | -0.1443 | -0.1782 | -0.3391 | -0.1097 | -0.501  | -0.5146 | -0.3436 | -0.3932 | -0.4522 | #N/A    |
| Sptbn2   | -0.2341 | -0.2537 | -0.4522 | -0.6616 | -1.4037 | -0.7894 | -0.5321 | -0.3875 | -0.6594 | -0.4979 | #N/A    |
| Rps6kb2  | -0.1276 | -0.2023 | -0.1667 | -0.2343 | 0.1039  | -0.3164 | -0.537  | -0.3637 | -0.4691 | -0.3788 | #N/A    |
| Sec61a2  | -0.0581 | -0.0852 | -0.0771 | -0.1755 | -0.3823 | -0.3883 | -0.5411 | -0.3214 | -0.3769 | -0.354  | #N/A    |
| Rasgrp2  | -0.2144 | -0.6542 | -0.6303 | -0.9415 | -0.8612 | -0.7173 | -0.5438 | -0.4496 | -0.4518 | -0.2853 | Rasgrp2 |
| Grap2    | -0.2487 | -0.1407 | -0.0691 | -0.1792 | 0.1885  | -0.8888 | -0.546  | -0.8439 | -0.8208 | -0.4212 | Grap2   |
| Dynll1   | 0.057   | -0.1584 | -0.2182 | -0.2214 | 0.1325  | -0.3152 | -0.5573 | -0.2684 | -0.3981 | -0.3661 | #N/A    |
| Actr1b   | -0.1621 | -0.303  | -0.3298 | -0.3659 | -0.6196 | -0.6531 | -0.5604 | -0.4831 | -0.3529 | 0.7137  | #N/A    |
| Rap1gap2 | -0.11   | -0.0989 | -0.0204 | -0.1602 | -0.973  | -0.689  | -0.6316 | -0.5395 | -0.6888 | -0.4797 | #N/A    |
| Trim9    | -0.0842 | -0.191  | -0.3176 | -0.471  | -0.7984 | -0.7274 | -0.8155 | -0.5377 | -0.7798 | -0.6846 | #N/A    |
| Fbxo27   | -0.4546 | -0.8063 | -0.7392 | -0.497  | -1.2653 | -0.9658 | -0.8164 | -0.5782 | -0.6359 | -0.5902 | #N/A    |
| Asb15    | -0.8656 | -1.0277 | -0.9168 | -0.4624 | -1.0535 | -4.9245 | -1.3482 | -1.0177 | -2.4325 | -0.58   | #N/A    |
| Asb9     | -3.2137 | -3.2137 | -0.476  | -3.2137 | -3.2137 | -3.2137 | -3.2137 | -3.2137 | -3.2137 | -3.2137 | #N/A    |
| Kir3dl1  | -0.5501 | -0.3793 | -3.3313 | -3.3313 | 0.5397  | -3.3313 | -3.3313 | -3.3313 | -3.3313 | 0.0597  | #N/A    |

## Adaptive

| Gene     | Log2(1h vs. pre) | Log2(3h vs. pre) | Log2(6h vs. pre) | Log2(1d vs. pre) | Log2(3d vs. pre) | Log2(1w vs. pre) | Log2(2w vs. pre) | Log2(1m vs. pre) | Log2(2m vs. pre) | Log2(6m vs. pre) | sig     |
|----------|------------------|------------------|------------------|------------------|------------------|------------------|------------------|------------------|------------------|------------------|---------|
| Sell     | 5.0944           | 5.6449           | 5.4058           | 6.0184           | 6.9385           | 5.6404           | 8.28             | 5.8615           | 8.1602           | 0                | #N/A    |
| Cd8a     | 3.2792           | 2.9576           | 5.1443           | 4.7019           | 5.0474           | 3.3759           | 7.6067           | 6.1246           | 6.7838           | 6.0463           | #N/A    |
| C3       | 0.8447           | 0.8876           | 1.7096           | 3.8823           | 4.5371           | 4.4705           | 7.4944           | 7.0415           | 6.9883           | 4.3129           | C3      |
| Klrc1    | 2.3865           | 0                | 0                | 0                | 5.7006           | 3.0464           | 7.0219           | 4.3482           | 5.5159           | 0                | #N/A    |
| Cd96     | 4.4945           | 2.796            | 4.3458           | 3.889            | 0                | 0                | 6.4634           | 3.5901           | 5.0845           | 0                | #N/A    |
| Cd226    | 3.4729           | 2.9521           | 0                | 4.3576           | 0                | 0                | 6.1396           | 3.8881           | 6.0507           | 4.2546           | #N/A    |
| Ulbp1    | 0                | 4.3542           | 3.6887           | 4.8033           | 7.191            | 6.5857           | 6.0124           | 4.2976           | 5.2125           | 3.5124           | #N/A    |
| Cybb     | 0.1              | 0.0866           | 0.1057           | 2.9732           | 5.0051           | 4.9041           | 5.9366           | 3.8983           | 5.2171           | 1.6258           | Cybb    |
| Cd74     | 0.5445           | 0.1015           | 0.2607           | 1.726            | 4.7119           | 2.1786           | 5.0646           | 4.0118           | 4.4572           | 1.645            | Cd74    |
| Pdcd1    | -0.2142          | 1.2329           | 1.7829           | 1.5638           | 4.0719           | 3.2388           | 4.9611           | 3.5872           | 2.6948           | 0.9696           | Pdcd1   |
| Cd19     | 0                | 0                | 2.7234           | 3.4153           | 0                | 0                | 4.6394           | 5.121            | 7.3935           | 4.3856           | #N/A    |
| Cd3g     | -1.6267          | -1.6686          | -2.416           | -0.2451          | 0.2199           | 0.2937           | 4.544            | 3.2386           | 3.7842           | 1.7956           | Cd3g    |
| Icos     | 1.6708           | 1.5719           | 2.1561           | 1.5156           | 3.197            | 2.6291           | 4.3093           | 2.6045           | 2.8496           | 1.5933           | #N/A    |
| Cd3e     | 0.1416           | -0.5353          | -0.5937          | 1.8041           | -3.3313          | 0.9187           | 4.2014           | 2.673            | 3.4452           | 2.467            | #N/A    |
| Fcgr2b   | 0.1034           | 0.1628           | 0.2427           | 2.1296           | 3.1906           | 3.3111           | 4.0739           | 2.541            | 2.219            | 0.8186           | Fcgr2b  |
| Ncf4     | 0.2786           | 0.5396           | 1.1271           | 2.4873           | 4.1758           | 3.6023           | 3.9527           | 2.5169           | 2.8662           | 1.5653           | Ncf4    |
| Klrk1    | 0.9785           | 2.3591           | 2.4776           | 0.5252           | 2.2319           | 0.6383           | 3.8526           | 2.0113           | 2.9237           | -1.5354          | Klrk1   |
| Card11   | -0.4423          | -0.0881          | 0.1213           | -0.4664          | 3.1568           | 2.8486           | 3.8378           | 1.1202           | 2.8681           | 0.8581           | Card11  |
| Blk      | 0                | 0                | 0                | 2.1662           | 0                | 0                | 3.8294           | 3.9894           | 6.1618           | 0                | #N/A    |
| Ctss     | 0.1695           | 0.3303           | 0.4172           | 0.6469           | 2.7569           | 3.2102           | 3.8063           | 2.3761           | 2.4669           | 1.0223           | Ctss    |
| Ptpn6    | 0.0998           | -0.4205          | 0.402            | 1.2999           | 3.0891           | 3.4682           | 3.7866           | 2.1696           | 2.2702           | 0.6202           | Ptpn6   |
| Ptprc    | 0.1373           | 0.2537           | 0.532            | 1.4805           | 2.8932           | 3.1709           | 3.7276           | 2.178            | 2.3595           | 0.3786           | Ptprc   |
| Asb12    | 2.9925           | 2.9521           | 2.7376           | 0                | 0                | 3.9833           | 3.6822           | 0                | 2.9612           | 3.5124           | #N/A    |
| Cd160    | 2.9925           | 2.796            | 4.6105           | 2.1662           | 0                | 0                | 3.6157           | 2.1805           | 4.9788           | 0                | #N/A    |
| Itgb2    | -0.5172          | 0.3494           | 0.3245           | 1.5258           | 3.0718           | 3.5162           | 3.5992           | 2.128            | 2.3112           | 0.7498           | Itgb2   |
| Tyrobp   | 0.0645           | 0.1475           | 0.1429           | 1.0426           | 3.4014           | 3.7381           | 3.5957           | 2.4152           | 2.1719           | 0.5491           | Tyrobp  |
| Tnfrsf14 | 0.3729           | -0.2333          | 1.1441           | 0.861            | 3.4408           | 2.5939           | 3.5705           | 1.9879           | 2.0987           | -0.6166          | #N/A    |
| Itgb7    | 0.649            | 0.2301           | 1.3101           | 1.3999           | 3.2371           | 2.0173           | 3.5036           | 1.6613           | 2.3121           | 1.1253           | Itgb7   |
| Cyba     | 0.3217           | 0.0958           | 0.3291           | 1.3676           | 3.8764           | 3.6251           | 3.4848           | 2.2375           | 2.5009           | 0.8009           | Cyba    |
| Pik3ap1  | -0.189           | 0.9416           | 0.7573           | 1.4043           | 2.0066           | 3.2664           | 3.4835           | 1.5863           | 1.8758           | 0.434            | Pik3ap1 |



|         |         |         |         |         |         |         |        |         |        |         |         |
|---------|---------|---------|---------|---------|---------|---------|--------|---------|--------|---------|---------|
| Ctsh    | 0.0324  | -0.2862 | 0.0658  | 0.5314  | 3.6814  | 3.2854  | 3.4746 | 2.0551  | 2.1402 | 0.9724  | Ctsh    |
| Psemb8  | -0.516  | -0.5524 | -0.3231 | 1.2659  | 3.2868  | 2.8771  | 3.4286 | 1.7156  | 1.9045 | 0.8602  | Psemb8  |
| Klrd1   | -0.4648 | -4.0767 | 0.716   | 0.2341  | 2.9205  | -0.1511 | 3.416  | 1.7831  | 2.1523 | -4.0767 | #N/A    |
| Cd86    | 1.0539  | 1.606   | 1.6158  | 1.7663  | 2.3627  | 2.7127  | 3.3439 | 1.8894  | 1.472  | 0.582   | Cd86    |
| Psemb9  | -0.9778 | 0.1565  | 0.0654  | 0.7246  | 3.0461  | 2.4187  | 3.3266 | 1.8648  | 1.9635 | 0.9549  | Psemb9  |
| Btk     | -0.8065 | 0.088   | 0.2109  | 1.2909  | 2.7785  | 3.2267  | 3.2103 | 1.6259  | 1.9415 | 0.6263  | Btk     |
| Tap1    | -0.5433 | -0.4643 | 0.3919  | 1.443   | 2.5487  | 2.2939  | 3.1878 | 1.0676  | 1.294  | 0.8906  | Tap1    |
| B2m     | 0.2281  | 0.394   | 0.4343  | 0.5762  | 2.6762  | 2.542   | 3.1262 | 1.9345  | 1.8342 | 0.746   | B2m     |
| Itgal   | 0.2405  | 0.6284  | 0.1962  | 1.3793  | 2.3315  | 2.3593  | 3.0793 | 1.7787  | 1.8273 | 0.3514  | Itgal   |
| Fyb     | 0.2899  | 0.4126  | 0.7606  | 1.4027  | 3.1725  | 3.1659  | 3.0589 | 1.7154  | 1.6131 | 0.3099  | Fyb     |
| Kif2c   | 0.5565  | 1.0934  | 0.098   | 1.3466  | 5.2306  | 4.3413  | 3.0451 | 1.7952  | 1.3432 | -0.3858 | Kif2c   |
| Uba7    | 0.2762  | -0.4042 | -0.5826 | 0.658   | 2.9385  | 3.1005  | 3.0304 | 1.7508  | 1.3938 | 0.5119  | Uba7    |
| Cd28    | -0.3733 | 0.1546  | 0.4254  | 1.058   | 1.3638  | 1.8283  | 2.9968 | 0.8644  | 1.6386 | -0.9022 | Cd28    |
| Cd36    | 0.2152  | 0.5452  | 0.5538  | 1.7877  | 3.0161  | 3.3318  | 2.9902 | 1.386   | 4.0107 | 1.0848  | Cd36    |
| Pσμα8   | 2.0677  | 2.429   | 2.1036  | 2.9831  | 3.2089  | 2.9132  | 2.9275 | 2.3367  | 2.0252 | 2.1519  | #N/A    |
| Icam1   | 1.5323  | 1.5745  | 3.1504  | 2.573   | 2.4591  | 2.4282  | 2.913  | 1.5589  | 1.843  | 1.3047  | Icam1   |
| Ctsc    | -0.0233 | -0.1652 | 0.2516  | 1.9976  | 2.9091  | 2.6761  | 2.9075 | 1.374   | 1.637  | 0.2433  | Ctsc    |
| Ctsd    | 0.1489  | 0.0864  | 0.1593  | 0.6176  | 3.1401  | 3.4722  | 2.9019 | 1.589   | 1.3668 | 0.829   | Ctsd    |
| Vav1    | -0.2154 | 0.1398  | 0.5475  | 1.4654  | 3.1654  | 2.9002  | 2.8899 | 1.5063  | 1.3741 | 0.3454  | Vav1    |
| Cd247   | 0.5427  | 0.1822  | -0.833  | 1.5296  | 2.1296  | -1.7206 | 2.7428 | 1.3678  | 1.1936 | -4.1971 | #N/A    |
| Lyn     | 0.2484  | 0.4018  | 0.5045  | 1.3517  | 2.3077  | 2.6211  | 2.7036 | 1.4305  | 1.2863 | 0.4297  | Lyn     |
| Btla    | 1.8166  | 1.4126  | 1.6625  | 1.7997  | 0.437   | 1.5559  | 2.7006 | 1.5165  | 2.7457 | 1.5042  | Btla    |
| Ncf2    | 0.0431  | 0.1139  | 0.6884  | 0.8265  | 2.4645  | 2.4004  | 2.6692 | 1.4061  | 1.5561 | 0.1475  | Ncf2    |
| Lat     | 1.4111  | 1.3141  | 1.3932  | 1.02    | 1.9798  | 1.0548  | 2.5469 | 1.6795  | 2.3057 | 0.0577  | #N/A    |
| Lcp2    | -0.3807 | 0.323   | 0.5443  | 1.6301  | 2.5125  | 2.6955  | 2.4988 | 1.0861  | 1.1546 | 0.1239  | Lcp2    |
| Cd40    | 0.3977  | 0.4486  | 1.1199  | 1.6414  | 2.8859  | 1.9117  | 2.4468 | 1.0794  | 1.2691 | 0.9959  | Cd40    |
| Plcg2   | 0.0416  | 0.1069  | 0.2146  | 0.9007  | 2.5255  | 2.5945  | 2.4345 | 1.2421  | 1.1621 | 0.19    | Plcg2   |
| Amica1  | 1.2759  | 1.2651  | 2.0614  | 1.4651  | 2.2061  | 0.9604  | 2.3974 | 0.0045  | 1.1868 | -0.351  | Amica1  |
| Hcst    | -0.8271 | -0.4177 | 0.6669  | 0.7594  | 3.197   | 3.2718  | 2.3925 | 0.9371  | 1.0692 | -0.0965 | #N/A    |
| Syk     | -0.2857 | -0.2429 | -0.2594 | 0.702   | 1.8876  | 2.0796  | 2.3732 | 0.9845  | 1.253  | -0.0596 | Syk     |
| Ctla4   | -3.2137 | -3.2137 | -0.4902 | 0.6753  | -3.2137 | 0.7657  | 2.2508 | -1.0331 | 1.5363 | -3.2137 | #N/A    |
| Cd200r1 | 0.0548  | 0.8497  | 0.3657  | 0.9361  | 1.1512  | 1.6477  | 2.2381 | 1.3282  | 1.7515 | 0.5305  | Cd200r1 |
| Cd40lg  | 2.3865  | 0       | 0       | 0       | 4.2808  | 0       | 2.1973 | 0       | 2.9612 | 0       | #N/A    |
| Cd79b   | -1.5864 | -4.5859 | -0.5453 | -0.1937 | 2.513   | 1.7243  | 2.0675 | 2.0696  | 3.0221 | -0.2003 | #N/A    |
| Trim21  | -0.2752 | 0.2426  | 0.2685  | 0.9597  | 1.1337  | 1.8801  | 2.066  | 0.9978  | 1.309  | 0.7415  | Trim21  |

|          |         |         |         |         |         |         |        |        |         |         |         |
|----------|---------|---------|---------|---------|---------|---------|--------|--------|---------|---------|---------|
| Itgb5    | 0.0052  | -0.0428 | -0.2331 | 0.0221  | 1.6718  | 2.18    | 1.9824 | 1.014  | 0.8136  | 0.24    | Itgb5   |
| Dtx3l    | -0.2414 | 0.1119  | 0.3453  | 0.5921  | 1.3904  | 1.5571  | 1.9243 | 0.5372 | 0.8675  | 0.4356  | Dtx3l   |
| Mrc2     | -0.4416 | -0.1425 | -0.3888 | 0.1285  | 1.2448  | 1.6689  | 1.9029 | 0.7921 | 1.0667  | 0.7059  | Mrc2    |
| Ctsb     | 0.067   | 0.1213  | 0.1953  | 0.4376  | 1.8553  | 2.172   | 1.8242 | 0.8212 | 0.8626  | 0.2342  | Ctsb    |
| Tap2     | 0.2001  | -0.1887 | 0.1019  | 0.9118  | 1.5336  | 1.284   | 1.8078 | 0.6993 | 0.9396  | 0.6714  | Tap2    |
| Cd80     | 1.0707  | 1.0134  | 1.5339  | 1.1999  | 2.236   | 0.7308  | 1.7746 | 0.9281 | 1.5259  | 1.9343  | #N/A    |
| Lgmn     | 0.1931  | 0.1831  | 0.2877  | 0.5865  | 2.3139  | 2.1247  | 1.7293 | 0.7063 | 0.6684  | 0.2614  | Lgmn    |
| Ifitm1   | -1.2604 | 0.1034  | 0.1205  | 1.7659  | 2.9373  | 1.4381  | 1.7269 | 0.9183 | 0.9837  | 0.5426  | Ifitm1  |
| Socs3    | 1.4058  | 1.8922  | 2.5199  | 3.5059  | 3.0082  | 1.4683  | 1.6474 | 0.7431 | 0.5004  | -0.7676 | Socs3   |
| Pdcd1lg2 | -2.965  | -0.169  | 0.1232  | 2.537   | -2.965  | 1.4197  | 1.6434 | 1.3285 | 0.79    | 1.9338  | #N/A    |
| Erap1    | -0.0605 | 0.209   | 0.2214  | 0.7902  | 0.8162  | 1.3596  | 1.6404 | 0.9398 | 0.9423  | 0.6335  | Erap1   |
| Trim63   | 0.829   | 2.8255  | 0.7163  | 1.6342  | 2.0824  | 1.3842  | 1.622  | 2.1653 | 2.1428  | 2.409   | #N/A    |
| Ctsa     | -0.0469 | -0.1489 | -0.0869 | 0.24    | 1.3604  | 1.7962  | 1.6139 | 0.6589 | 0.505   | 0.0482  | Ctsa    |
| Ube2c    | 0.5748  | 0.7112  | 1.266   | 1.3839  | 4.7387  | 3.1351  | 1.5886 | 0.2993 | 0.5963  | -0.0138 | Ube2c   |
| Map3k8   | 0.3141  | 1.1174  | 1.6822  | 0.5616  | 1.1044  | 1.5487  | 1.5799 | 0.9805 | 0.9679  | 0.4401  | Map3k8  |
| Mrc1     | 0.0017  | 0.4589  | 0.2767  | 0.8785  | 0.8656  | 1.0732  | 1.5731 | 0.5958 | 1.1552  | 0.1212  | Mrc1    |
| Cd79a    | 0.2911  | -0.0256 | 0.0654  | 0.4974  | 1.0583  | 0.0511  | 1.533  | 1.0985 | 2.9232  | 0.2491  | #N/A    |
| Ube2l6   | -0.3016 | -0.2114 | -0.2775 | 0.2585  | 1.2609  | 1.1985  | 1.5274 | 0.3784 | 0.617   | 0.0806  | Ube2l6  |
| Kif15    | 0.6236  | 0.4496  | 0.3577  | 0.6294  | 3.4721  | 2.8899  | 1.4919 | 0.4175 | 0.6703  | -0.2928 | Kif15   |
| Cd274    | 0.3259  | 0.5027  | 0.3284  | 0.7727  | 0.9311  | 0.7922  | 1.4532 | 0.5468 | 0.485   | 1.3835  | Cd274   |
| Kif22    | -0.4568 | 0.1917  | 0.2849  | 1.0876  | 3.5753  | 2.3971  | 1.4308 | 0.5316 | 0.048   | 0.5105  | Kif22   |
| Kif20a   | -0.9218 | -0.1306 | -0.001  | -0.4607 | 3.4048  | 2.6686  | 1.4008 | 0.5179 | 0.1305  | -0.424  | Kif20a  |
| Kif18a   | 1.1239  | 0.6967  | 0.6092  | 1.1832  | 2.2578  | 1.9036  | 1.3759 | 0.8273 | 0.8574  | 0.5326  | Kif18a  |
| Vcam1    | 0.1674  | 0.4494  | 0.7386  | 0.4154  | 0.5117  | 0.8817  | 1.3681 | 0.6929 | 0.6948  | 0.5554  | Vcam1   |
| Cdc20    | -0.1295 | 0.7841  | -0.159  | 0.4293  | 3.6366  | 2.3447  | 1.3233 | 0.2422 | -0.5537 | -2.1995 | Cdc20   |
| Vasp     | 0.4026  | 0.0394  | 0.4332  | 0.9634  | 1.4543  | 1.3891  | 1.3084 | 0.3911 | 0.7594  | 0.1041  | Vasp    |
| Blnk     | 0.1605  | 0.6933  | 1.2485  | 0.7719  | 1.0985  | 1.193   | 1.3038 | 0.2929 | 0.2369  | -0.4639 | Blnk    |
| Was      | 0.3221  | 0.6158  | 0.5514  | 0.4838  | 1.4745  | 1.0435  | 1.2834 | 0.3702 | 0.2664  | -0.021  | Was     |
| Itk      | 0.1152  | 0.2385  | 0.3081  | -0.0149 | -0.1512 | -0.0321 | 1.2818 | 0.5481 | 0.9917  | 0.4245  | Itk     |
| Cdh1     | -0.2579 | 1.388   | 0.9344  | 0.8606  | 0.9375  | 1.3458  | 1.2782 | 1.0762 | 1.5071  | 0.9766  | Cdh1    |
| Rasgrp3  | 0.0655  | 0.2784  | 0.4336  | 0.1447  | 0.7727  | 1.2196  | 1.205  | 0.595  | 0.3493  | 0.2899  | Rasgrp3 |
| Ctsk     | 0.2443  | 0.0874  | -0.2047 | 0.3518  | -0.1209 | 1.0469  | 1.1868 | 0.326  | 1.4638  | 0.326   | Ctsk    |
| Spsb2    | 0.4932  | 0.3978  | 0.2808  | 0.9008  | 2.073   | 1.3165  | 1.1326 | 0.8199 | 0.9459  | 0.5578  | Spsb2   |
| Nfkbie   | -0.2384 | 0.0341  | 0.1221  | 0.2455  | 1.1197  | 0.7467  | 1.1285 | 0.2243 | 0.2596  | -0.4942 | Nfkbie  |
| Psme2    | -0.0469 | -0.3544 | -0.1657 | 0.5024  | 1.528   | 0.971   | 1.1003 | 0.5048 | 0.6171  | 0.3882  | Psme2   |

|         |         |         |         |         |         |         |        |         |         |         |         |
|---------|---------|---------|---------|---------|---------|---------|--------|---------|---------|---------|---------|
| Itgb1   | 0.0573  | 0.2697  | 0.2705  | 0.6815  | 1.1575  | 1.128   | 1.0421 | 0.498   | 0.6511  | 0.4027  | Itgb1   |
| Lrr1    | 1.5295  | -0.0075 | 1.5231  | 1.3056  | 4.4858  | 2.8512  | 1.0407 | 0.1241  | -2.965  | 0.1521  | #N/A    |
| Psme1   | 0.0898  | 0.178   | 0.1012  | 0.3746  | 1.4899  | 0.998   | 1.0387 | 0.5907  | 0.6431  | 0.4604  | Psme1   |
| Shc1    | 0.0129  | 0.2436  | 0.4724  | 0.5669  | 1.0256  | 1.0726  | 1.0148 | -0.0098 | 0.3329  | -0.0229 | Shc1    |
| Rel     | 0.6275  | 0.6615  | 0.9227  | 0.5684  | 0.3503  | 0.2523  | 0.9293 | 0.2979  | 0.1943  | -0.6274 | Rel     |
| Kif11   | 0.0397  | 0.2772  | 0.2052  | 0.1338  | 2.5877  | 1.865   | 0.9195 | 0.4318  | 0.191   | -0.0555 | Kif11   |
| Itpr2   | 0.1402  | 0.1811  | 0.1763  | 0.1693  | 0.9336  | 1.0591  | 0.8771 | 0.3109  | 0.1997  | -0.0178 | Itpr2   |
| Sipa1   | -0.0335 | -0.2485 | 0.0236  | 0.343   | 1.7482  | 1.1051  | 0.8565 | 0.2697  | 0.3233  | 0.0044  | Sipa1   |
| Dnm2    | 0.1518  | 0.1045  | 0.2428  | 0.5617  | 0.743   | 1.0083  | 0.8372 | 0.4215  | 0.2937  | 0.1721  | Dnm2    |
| Itpr3   | 0.0423  | -0.2935 | -0.0151 | 0.5078  | 0.9324  | 1.1711  | 0.8292 | 0.4695  | 0.4906  | 0.7321  | Itpr3   |
| Orai1   | 0.3226  | 0.0201  | 0.2536  | 0.4283  | 1.6705  | 1.0792  | 0.792  | 0.0866  | 0.1593  | 0.0627  | Orai1   |
| Pvrl2   | 0.4094  | 0.3091  | 0.5219  | 0.5666  | 1.7256  | 0.9239  | 0.7804 | 0.7043  | 0.5828  | 0.6343  | Pvrl2   |
| Trib3   | -0.2439 | 0.7124  | 0.6673  | 1.3601  | 0.9693  | -0.9029 | 0.7779 | 0.0479  | -0.0112 | -0.3205 | #N/A    |
| Csk     | -0.0374 | -0.0702 | -0.0302 | 0.417   | 1.1255  | 0.8152  | 0.7286 | 0.2309  | 0.4927  | 0.1797  | Csk     |
| Ripk2   | 0.4624  | 0.5364  | 0.5257  | 0.3085  | 0.4632  | 0.6776  | 0.6383 | 0.1336  | 0.3871  | 0.381   | Ripk2   |
| Ctso    | -0.0338 | 0.1763  | 0.2813  | 0.0728  | 0.1174  | 0.4899  | 0.632  | 0.3995  | 0.338   | 0.329   | #N/A    |
| Rap1b   | 0.0474  | 0.285   | 0.3216  | 0.4442  | 0.4485  | 0.684   | 0.6121 | 0.2653  | 0.2517  | 0.0327  | Rap1b   |
| Prkcq   | 0.2914  | 0.0705  | 0.3817  | 0.0863  | 0.2496  | 0.6226  | 0.601  | 0.5934  | 0.4344  | 0.3604  | #N/A    |
| Malt1   | -0.0526 | 0.1842  | 0.4683  | 0.4092  | 0.2727  | 0.3759  | 0.5949 | 0.1512  | 0.1021  | -0.0294 | Malt1   |
| Cd34    | -0.0367 | 0.0612  | 0.0441  | 0.1372  | 0.1754  | 0.3837  | 0.5938 | 0.4238  | 0.2881  | 0.3529  | #N/A    |
| Rela    | 0.1259  | 0.0987  | 0.3783  | 0.5899  | 0.5953  | 0.6446  | 0.5912 | 0.1803  | 0.1615  | 0.0465  | Rela    |
| Icam2   | 0.095   | -0.3935 | -0.1558 | 0.6376  | 1.2253  | 0.8776  | 0.5705 | 0.183   | 0.6155  | 0.2726  | #N/A    |
| Lnpep   | -0.0819 | 0.2818  | -0.1468 | -0.2056 | -0.7051 | 0.1057  | 0.5612 | 0.3268  | 0.3036  | 0.2294  | #N/A    |
| Map3k14 | 0.1284  | 0.4356  | 0.6481  | 0.5154  | 0.4744  | 0.5809  | 0.5579 | -0.1794 | 0.2994  | -0.4282 | Map3k14 |
| Bcl10   | 0.0711  | 0.3632  | 0.5871  | 0.6152  | 0.1967  | 0.5391  | 0.5454 | 0.2994  | 0.5433  | 0.452   | Bcl10   |
| Rap1a   | 0.0759  | 0.1876  | 0.2628  | 0.3477  | 0.4452  | 0.5101  | 0.5084 | 0.3514  | 0.4439  | 0.1598  | #N/A    |
| Lck     | -0.3856 | -0.3974 | -0.3615 | -0.1789 | 0.2409  | -0.8957 | 0.4898 | 0.3634  | 0.4409  | -0.7459 | #N/A    |
| Ap1m2   | 0.8386  | 0.5382  | 1.0175  | -0.1979 | -5.405  | -1.3554 | 0.478  | 0.2867  | -0.0138 | 0.2496  | #N/A    |
| Trim36  | -0.3613 | -0.0669 | 0.0713  | -0.0064 | 0.0122  | 0.2641  | 0.4685 | 0.2519  | 0.3014  | 0.2824  | #N/A    |
| Pag1    | -0.0805 | -0.002  | 0.1096  | -0.0634 | 0.1192  | 0.3443  | 0.4593 | 0.0739  | 0.0349  | -0.0952 | #N/A    |
| Sec24d  | -0.2123 | 0.2942  | 0.4449  | 0.5098  | 0.1372  | 0.397   | 0.4586 | 0.1914  | 0.2861  | 0.1652  | #N/A    |
| Dync2h1 | 0.207   | 0.2916  | 0.1581  | -0.04   | -0.3191 | 0.2367  | 0.4375 | 0.4729  | 0.4562  | 0.457   | #N/A    |
| Anapc13 | 0.3067  | 0.2618  | 0.2997  | 0.1753  | 1.1337  | 0.3824  | 0.4354 | 0.3121  | 0.4268  | 0.3592  | #N/A    |
| Rilp    | 0.1667  | 0.1933  | 0.6138  | 0.6812  | 0.4981  | 0.1394  | 0.4211 | -0.0146 | 1.0031  | 0.442   | #N/A    |
| Asb2    | 0.277   | 0.2089  | 0.4993  | 0.4872  | 0.81    | 0.4231  | 0.4208 | -0.0664 | 0.3858  | 0.0693  | #N/A    |

|          |         |         |         |         |         |         |        |         |         |         |        |
|----------|---------|---------|---------|---------|---------|---------|--------|---------|---------|---------|--------|
| Pik3cd   | -0.1608 | -0.2836 | -0.1423 | -0.0543 | 0.3912  | 0.3114  | 0.4204 | -0.087  | -0.1732 | -0.4668 | #N/A   |
| Kif23    | 0.7057  | 0.7383  | 0.7565  | -0.1003 | 2.5207  | 1.9743  | 0.4129 | -0.2129 | -0.1375 | -0.3058 | Kif23  |
| Yes1     | -0.0898 | 0.2559  | 0.3129  | 0.3647  | -0.2648 | 0.3974  | 0.3951 | 0.1937  | 0.3382  | 0.2552  | #N/A   |
| Pak2     | -0.0134 | 0.1169  | 0.08    | 0.2108  | 0.2326  | 0.3578  | 0.3825 | 0.1421  | 0.0942  | -0.0007 | #N/A   |
| Rapgef3  | 0.3879  | 0.1387  | 0.1786  | 0.1775  | 0.256   | 0.2868  | 0.3768 | 0.2462  | 0.2267  | 0.1489  | #N/A   |
| Cbl      | -0.0676 | 0.2837  | 0.0443  | 0.0609  | -0.4599 | 0.056   | 0.3736 | 0.1287  | 0.1047  | 0.0335  | #N/A   |
| Asb4     | 0.7436  | 0.6447  | 0.3766  | 0.2449  | 0.4168  | 0.1044  | 0.3577 | 0.5748  | 0.988   | 1.2321  | Asb4   |
| Dync1h1  | 0.0646  | 0.1145  | -0.0431 | -0.1512 | -0.3904 | 0.1318  | 0.3545 | 0.2918  | 0.2126  | 0.3142  | #N/A   |
| Dync2li1 | 0.0525  | -0.0994 | 0.0166  | 0.0859  | -0.1818 | 0.334   | 0.3526 | 0.4286  | 0.4718  | 0.2868  | #N/A   |
| Nck1     | 0.1431  | 0.2368  | 0.2327  | 0.1428  | -0.008  | 0.2068  | 0.3505 | 0.3843  | 0.42    | 0.5323  | #N/A   |
| Cd81     | -0.0231 | -0.0894 | -0.0024 | 0.1126  | 0.3331  | 0.3721  | 0.3406 | 0.0817  | 0.0373  | -0.0788 | #N/A   |
| Gan      | 0.1625  | 0.5318  | 0.4485  | 0.57    | -0.2778 | 0.1211  | 0.3401 | 0.3993  | 0.3121  | 0.1336  | #N/A   |
| Fbxo17   | 0.433   | 1.2159  | 1.4797  | 1.2486  | 0.8718  | 0.201   | 0.3336 | 0.0095  | 0.2672  | 0.2058  | Fbxo17 |
| Foxo4    | 0.1179  | 0.0839  | 0.2536  | 0.034   | 0.4047  | 0.4459  | 0.3197 | 0.1183  | 0.3283  | 0.214   | #N/A   |
| Sec61a1  | -0.0513 | -0.0978 | 0.2042  | 0.5235  | 0.5735  | 0.2528  | 0.3133 | -0.1348 | -0.0029 | -0.2989 | #N/A   |
| Cul7     | -0.2437 | -0.4886 | -0.3946 | -0.1412 | -0.0768 | 0.125   | 0.3099 | 0.0875  | 0.1195  | 0.0437  | #N/A   |
| Rnf144b  | -0.0319 | 0.1515  | 0.0464  | -0.0387 | -0.2906 | 0.1357  | 0.2945 | -0.0848 | -0.0053 | 0.0584  | #N/A   |
| Clta     | -0.0156 | -0.1046 | -0.1659 | -0.0117 | 0.6151  | 0.3881  | 0.2893 | 0.1266  | 0.1301  | 0.1578  | #N/A   |
| Skp2     | -0.1368 | -0.016  | 0.3622  | 0.2281  | -0.1356 | 0.3261  | 0.2883 | -0.0877 | 0.1124  | 0.2879  | #N/A   |
| Pdia3    | 0.1408  | 0.2286  | -0.0108 | 0.1194  | 0.514   | 0.4403  | 0.2801 | 0.159   | 0.047   | -0.2027 | #N/A   |
| Trip12   | -0.0245 | 0.2137  | 0.1291  | 0.0799  | -0.4527 | 0.1571  | 0.2781 | 0.1979  | 0.1732  | 0.1606  | #N/A   |
| Spsb1    | 0.5349  | 0.585   | 0.5318  | 0.6544  | 0.9332  | 0.7394  | 0.2759 | -0.022  | 0.0005  | 0.0224  | Spsb1  |
| Icam4    | -0.1945 | 0.6344  | 0.136   | 0.0262  | -0.1937 | 0.5362  | 0.2555 | -0.2881 | 0.6571  | -0.9062 | #N/A   |
| Cdc26    | 0.0474  | -0.1273 | 0.0351  | 0.147   | 0.4086  | 0.2604  | 0.2445 | 0.3655  | 0.4419  | 0.5048  | #N/A   |
| Sh3kbp1  | -0.0539 | -0.0646 | -0.222  | -0.0856 | -0.0457 | 0.1767  | 0.2437 | 0.0538  | 0.0007  | 0.0922  | #N/A   |
| Psme4    | 0.0255  | 0.1849  | 0.2394  | 0.224   | -0.0594 | 0.0674  | 0.2431 | 0.0613  | 0.0612  | 0.0073  | #N/A   |
| Traf6    | 0.038   | 0.3547  | 0.5471  | 0.4203  | -0.1795 | 0.231   | 0.2418 | 0.1304  | 0.1848  | 0.1355  | #N/A   |
| Trat1    | 0.1844  | -1.5857 | 1.7931  | 1.1348  | 0.3084  | -0.2132 | 0.2416 | 0.2633  | 0.5474  | -0.3544 | #N/A   |
| Anapc1   | -0.2224 | -0.0404 | -0.1198 | -0.0372 | -0.3629 | 0.1179  | 0.2376 | 0.118   | 0.039   | 0.1142  | #N/A   |
| Sec61b   | -0.0633 | -0.4694 | -0.3888 | 0.3272  | 0.9541  | 0.4431  | 0.2263 | 0.0349  | 0.3495  | 0.301   | #N/A   |
| Ikbkb    | 0.0638  | -0.0605 | -0.0971 | -0.1208 | -0.2638 | 0.1467  | 0.2126 | -0.0007 | -0.0717 | -0.0523 | #N/A   |
| Nedd4    | -0.1304 | 0.0304  | -0.0861 | -0.0524 | -0.6804 | 0.1314  | 0.2121 | 0.1828  | 0.0922  | 0.1376  | #N/A   |
| Phlpp1   | -0.0704 | -0.0991 | -0.1918 | -0.3461 | -0.7111 | -0.0412 | 0.2119 | 0.2416  | 0.0846  | 0.0746  | #N/A   |
| Sec13    | -0.0089 | -0.0015 | 0.0678  | 0.195   | 0.2342  | 0.2363  | 0.21   | 0.0954  | -0.0335 | -0.0689 | #N/A   |
| Cdkn1b   | 0.2451  | 0.1559  | 0.0852  | -0.0274 | 0.1444  | 0.1794  | 0.2057 | 0.1697  | 0.2328  | 0.0823  | #N/A   |

|         |         |         |         |         |         |         |        |         |         |         |         |
|---------|---------|---------|---------|---------|---------|---------|--------|---------|---------|---------|---------|
| Psmb10  | 0.1197  | 0.1787  | 0.1707  | 0.1182  | 0.9954  | 0.088   | 0.202  | -0.009  | 0.142   | 0.175   | #N/A    |
| Cltc    | -0.0191 | 0.1763  | -0.0084 | -0.1464 | -0.6869 | 0.0332  | 0.1994 | 0.1549  | 0.0338  | 0.0474  | #N/A    |
| Klc3    | -0.2969 | -0.6715 | -0.7038 | -0.3579 | 0.273   | 0.1737  | 0.1989 | 0.0298  | 0.2631  | 0.6409  | #N/A    |
| Cdc23   | -0.0549 | -0.0325 | -0.0089 | -0.0834 | -0.4813 | 0.1561  | 0.1987 | 0.2636  | 0.1509  | 0.2964  | #N/A    |
| Tab2    | -0.109  | -0.0006 | 0.1018  | 0.1377  | 0.2525  | 0.2416  | 0.1964 | 0.0492  | 0.0523  | 0.0235  | #N/A    |
| Wwp1    | -0.0824 | 0.0005  | -0.0029 | -0.023  | -0.2972 | 0.1996  | 0.1956 | 0.066   | -0.1217 | -0.0718 | #N/A    |
| Rps27a  | 0.1037  | 0.1529  | 0.2455  | 0.3379  | 1.1719  | 0.2611  | 0.1955 | 0.1488  | 0.3032  | 0.1641  | #N/A    |
| Pik3r3  | 0.0665  | 0.1398  | 0.1816  | 0.0838  | -0.3877 | 0.3729  | 0.1916 | 0.0968  | 0.0553  | 0.0104  | #N/A    |
| Nfkbia  | 0.5199  | 0.4644  | 0.304   | 0.5425  | 0.9523  | 0.1397  | 0.1913 | -0.3802 | -0.1448 | -0.3242 | #N/A    |
| Ube2f   | 0.0964  | 0.3843  | 0.3494  | 0.2893  | 0.253   | 0.0943  | 0.1881 | 0.1375  | 0.1579  | 0.3905  | #N/A    |
| Rchy1   | 0.0528  | 0.1687  | 0.2818  | 0.4374  | 0.0973  | 0.0204  | 0.1875 | 0.1052  | 0.259   | 0.1312  | #N/A    |
| Psm4    | 0.1336  | 0.0571  | 0.1353  | 0.1601  | 0.59    | 0.2628  | 0.1866 | 0.1317  | 0.2078  | 0.228   | #N/A    |
| Anapc7  | -0.0947 | -0.3496 | -0.0841 | 0.0092  | 0.2752  | 0.135   | 0.1864 | 0.0162  | 0.0226  | -0.01   | #N/A    |
| Ube3a   | 0.2331  | 0.1868  | 0.1099  | 0.2783  | 0.2616  | 0.0844  | 0.1845 | 0.267   | 0.2638  | 0.1977  | #N/A    |
| Nras    | -0.0977 | 0.0826  | 0.2208  | 0.4146  | 0.7532  | 0.3034  | 0.1833 | -0.1681 | -0.2261 | -0.2207 | #N/A    |
| Ubr2    | -0.0785 | -0.0741 | -0.085  | -0.0272 | -0.6199 | 0.0764  | 0.1736 | 0.0653  | -0.0087 | 0.0426  | #N/A    |
| Psm1    | 0.1013  | 0.0864  | 0.0194  | 0.1452  | 0.3395  | 0.1737  | 0.1673 | 0.2252  | 0.1518  | 0.0804  | #N/A    |
| Racgap1 | -0.0394 | -0.0299 | 0.1892  | 0.0811  | 1.1276  | 0.903   | 0.1619 | -0.0716 | -0.3405 | 0.1403  | Racgap1 |
| Ubr4    | -0.0383 | 0.0359  | -0.1477 | -0.1485 | -0.5814 | 0.0315  | 0.1602 | 0.0993  | 0.0391  | 0.1299  | #N/A    |
| Psmc2   | 0.1624  | 0.1609  | 0.1614  | 0.3124  | 0.2699  | 0.1481  | 0.157  | 0.2189  | 0.1697  | 0.3605  | #N/A    |
| Cblb    | 0.0508  | 0.1535  | 0.2483  | 0.0432  | -0.7329 | 0.0748  | 0.1491 | 0.1485  | -0.0084 | -0.0796 | #N/A    |
| Sos1    | 0.0409  | 0.0063  | 0.0314  | 0.026   | -0.5953 | -0.0553 | 0.1468 | 0.1348  | 0.2294  | 0.2845  | #N/A    |
| Psm6    | 0.109   | 0.1509  | 0.1587  | 0.339   | 0.552   | 0.1908  | 0.1441 | 0.2648  | 0.2893  | 0.3122  | #N/A    |
| Mdm2    | 0.0887  | 0.3787  | 0.4971  | 0.7286  | 0.1471  | 0.2825  | 0.1431 | -0.0694 | -0.0766 | -0.0863 | #N/A    |
| Ppp2r1b | 0.0009  | 0.3184  | 0.3849  | 0.586   | 0.2917  | 0.3132  | 0.1428 | -0.0245 | -0.0183 | -0.1442 | Ppp2r1b |
| Anapc2  | -0.1337 | -0.2993 | -0.2199 | -0.0881 | -0.1203 | 0.1095  | 0.1427 | 0.0626  | 0.0907  | 0.0951  | #N/A    |
| Ap1s2   | 0.0893  | 0.0928  | 0.0503  | 0.0932  | -0.0657 | 0.1754  | 0.1412 | 0.2198  | 0.3718  | 0.4227  | #N/A    |
| Canx    | 0.0344  | 0.1589  | 0.0163  | 0.0232  | -0.306  | 0.0452  | 0.1406 | 0.0533  | 0.0964  | -0.0147 | #N/A    |
| Asb5    | 0.7019  | 0.0836  | 0.298   | 0.9788  | 0.1984  | 0.3848  | 0.1402 | -0.4678 | -0.5626 | 0.433   | #N/A    |
| Pik3ca  | 0.1504  | 0.083   | 0.1139  | 0.0891  | 0.3115  | 0.1606  | 0.1402 | 0.137   | 0.1266  | 0.0258  | #N/A    |
| Ube2l3  | -0.0477 | 0.0328  | 0.0304  | 0.1064  | 0.1191  | 0.1552  | 0.1353 | 0.0057  | -0.0444 | -0.0291 | #N/A    |
| Psm5    | -0.0754 | 0.015   | 0.0172  | -0.04   | -0.3297 | 0.0586  | 0.1304 | 0.1929  | 0.1478  | 0.2763  | #N/A    |
| Sar1b   | -0.1344 | 0.0057  | -0.0239 | 0.1522  | -0.0383 | 0.0142  | 0.128  | 0.055   | -0.0142 | -0.0201 | #N/A    |
| Ctsf    | 0.062   | -0.1394 | -0.0689 | -0.0765 | -0.1937 | 0.1139  | 0.1277 | 0.0016  | -0.0814 | -0.0756 | #N/A    |
| Klc4    | -0.1206 | -0.4238 | -0.4257 | -0.2358 | 0.3464  | 0.2008  | 0.1267 | -0.132  | 0.0545  | 0.2053  | #N/A    |

|        |         |         |         |         |         |         |        |         |         |         |      |
|--------|---------|---------|---------|---------|---------|---------|--------|---------|---------|---------|------|
| Ube2j2 | -0.3016 | -0.3113 | -0.551  | 0.2304  | 0.1216  | 0.1472  | 0.1229 | 0.2094  | 0.1687  | 0.1046  | #N/A |
| Uba6   | 0.0599  | -0.0905 | -0.1558 | -0.1304 | -0.7465 | -0.0015 | 0.1228 | 0.1594  | 0.1842  | 0.1882  | #N/A |
| Cdc27  | 0.0229  | 0.1652  | 0.253   | 0.2223  | -0.3104 | 0.1072  | 0.1226 | 0.0887  | 0.0669  | 0.0907  | #N/A |
| Atg7   | -0.0449 | -0.1162 | -0.0241 | -0.018  | 0.1319  | 0.1675  | 0.1163 | 0.1132  | -0.047  | -0.2099 | #N/A |
| Uba2   | -0.0297 | -0.0345 | 0.0404  | 0.0333  | -0.1654 | 0.0561  | 0.113  | 0.1655  | 0.0293  | 0.1192  | #N/A |
| Psm6   | -0.0138 | 0.0683  | 0.137   | 0.258   | 0.0386  | 0.0824  | 0.1114 | 0.1343  | 0.1451  | 0.1502  | #N/A |
| Smurf2 | -0.2218 | 0.0375  | 0.0789  | 0.0528  | -0.5034 | 0.1214  | 0.1047 | 0.1039  | 0.1659  | 0.1592  | #N/A |
| Kif5b  | 0.2369  | 0.2542  | 0.2823  | 0.4086  | 0.6033  | 0.1606  | 0.1039 | 0.17    | 0.1952  | 0.0859  | #N/A |
| Psmc3  | 0.0824  | 0.1007  | 0.1655  | 0.1264  | 0.267   | 0.1344  | 0.1015 | 0.1382  | 0.1136  | 0.1699  | #N/A |
| Rictor | 0.0652  | 0.0871  | 0.132   | 0.0036  | -0.7102 | -0.0015 | 0.1014 | 0.0712  | -0.0123 | -0.0581 | #N/A |
| Prkg1  | 0.0554  | 0.1465  | -0.1111 | -0.2633 | -0.3222 | -0.1036 | 0.0973 | 0.1148  | 0.0779  | 0.1134  | #N/A |
| Psm6   | 0.059   | 0.0056  | 0.032   | 0.195   | 0.928   | 0.1073  | 0.0971 | 0.0891  | 0.1067  | 0.0966  | #N/A |
| Pvr    | 0.3054  | 0.7595  | 0.9973  | 1.1678  | 0.7437  | 0.2526  | 0.097  | 0.0065  | 0.0873  | -0.0181 | Pvr  |
| Spsb4  | 0.4354  | 0.0625  | 0.4797  | 0.1075  | 0.9424  | 0.1686  | 0.0947 | 0.4297  | 0.3261  | -0.205  | #N/A |
| Rnf6   | 0.112   | 0.158   | 0.2109  | 0.1309  | -0.2475 | 0.0621  | 0.094  | 0.1968  | 0.1437  | 0.2554  | #N/A |
| Ube2u  | 0.1555  | 0.55    | -0.1867 | 0.1347  | 0.5414  | 0.7677  | 0.0924 | 0.6024  | 0.8174  | 0.8372  | #N/A |
| Uba52  | 0.0634  | -0.0022 | 0.0663  | 0.1718  | 0.8394  | 0.2313  | 0.092  | 0.0729  | 0.0519  | -0.0345 | #N/A |
| Psm9   | 0.2692  | 0.2192  | 0.2076  | 0.3044  | 0.4865  | 0.2949  | 0.0881 | 0.1224  | 0.1731  | 0.1504  | #N/A |
| Huwe1  | -0.0183 | 0.0714  | -0.029  | -0.1102 | -0.5159 | -0.0349 | 0.0838 | 0.1551  | 0.1009  | 0.17    | #N/A |
| Ap1m1  | -0.2083 | -0.2658 | -0.3073 | -0.1475 | -0.5618 | -0.0263 | 0.0828 | -0.1189 | -0.1703 | -0.2297 | #N/A |
| Rac1   | -0.0338 | 0.0959  | 0.0351  | 0.0131  | 0.169   | 0.1731  | 0.081  | -0.0058 | -0.0266 | -0.0069 | #N/A |
| Arf1   | -0.0031 | 0.0249  | -0.0116 | 0.0297  | -0.1103 | 0.0541  | 0.0772 | 0.0825  | 0.0009  | 0.0886  | #N/A |
| Klhl20 | -0.3655 | -0.0324 | -0.1032 | -0.1711 | -0.7384 | -0.0249 | 0.0717 | -0.0291 | -0.0382 | 0.0118  | #N/A |
| Psm10  | 0.1517  | -0.0162 | -0.0584 | 0.0029  | -0.0845 | 0.0006  | 0.0703 | 0.115   | 0.2387  | 0.1624  | #N/A |
| Tpp2   | -0.0141 | 0.0891  | 0.0361  | 0.0117  | -0.152  | 0.0576  | 0.0696 | 0.0762  | 0.0122  | 0.1013  | #N/A |
| Psmf1  | 0.007   | 0.0831  | 0.0865  | 0.1225  | -0.071  | 0.0136  | 0.0695 | -0.0064 | -0.034  | 0.1127  | #N/A |
| Psm2   | 0.0117  | -0.0671 | -0.0574 | 0.144   | 0.0324  | 0.0708  | 0.0673 | 0.0163  | -0.0205 | 0.0698  | #N/A |
| Uba1   | 0.0189  | -0.0061 | -0.0108 | -0.0349 | -0.035  | 0.0523  | 0.0672 | 0.0346  | 0.0302  | 0.1083  | #N/A |
| Sec24c | -0.0008 | -0.081  | 0.0385  | 0.0959  | -0.1477 | -0.0703 | 0.0665 | 0.0092  | -0.1123 | -0.098  | #N/A |
| Rnf138 | -0.1351 | -0.1236 | 0.1996  | 0.1068  | -0.2526 | -0.1965 | 0.0647 | -0.1565 | -0.1228 | -0.2868 | #N/A |
| Anapc4 | -0.0755 | 0.051   | 0.0475  | 0.1018  | 0.0037  | 0.0768  | 0.0643 | 0.163   | 0.1676  | 0.1753  | #N/A |
| Cul1   | -0.0264 | 0.095   | 0.0512  | 0.0187  | -0.5105 | 0.0813  | 0.0639 | 0.1907  | 0.1569  | 0.1165  | #N/A |
| Psm3   | 0.135   | 0.1543  | 0.2016  | 0.2613  | 0.6299  | 0.1184  | 0.0622 | 0.1164  | 0.1011  | -0.0251 | #N/A |
| Ubr1   | -0.1852 | -0.0196 | -0.1192 | -0.0854 | -0.6138 | -0.0831 | 0.062  | 0.1023  | 0.0706  | 0.054   | #N/A |
| Nfkbib | 0.1749  | 0.1186  | 0.0213  | 0.2068  | 0.4085  | 0.1918  | 0.06   | -0.0344 | 0.076   | 0.1707  | #N/A |

|         |         |         |         |         |         |         |        |         |         |         |      |
|---------|---------|---------|---------|---------|---------|---------|--------|---------|---------|---------|------|
| Ilgav   | -0.0355 | 0.0963  | -0.0299 | -0.072  | -0.0127 | 0.1329  | 0.0576 | 0.0001  | -0.1683 | -0.1209 | #N/A |
| Raf1    | -0.0668 | -0.0584 | -0.0684 | -0.0219 | -0.3105 | 0.059   | 0.0572 | -0.0798 | 0.0265  | 0.0834  | #N/A |
| Foxo1   | -0.0881 | 0.0267  | -0.0975 | -0.2052 | -0.2147 | 0.0012  | 0.0562 | -0.0998 | 0.0097  | -0.0933 | #N/A |
| Asb3    | -0.0153 | -0.0325 | -0.1526 | -0.1666 | -0.4564 | -0.0072 | 0.0548 | 0.1427  | 0.0942  | -0.1024 | #N/A |
| Pik3r1  | 0.2878  | 0.0934  | 0.1236  | -0.0455 | -0.1833 | 0.0582  | 0.0532 | -0.0524 | -0.0908 | -0.0086 | #N/A |
| Anapc10 | -0.1972 | -0.0191 | -0.1167 | 0.0465  | -0.0212 | 0.1198  | 0.0528 | 0.3191  | 0.2421  | 0.1131  | #N/A |
| Psmc13  | 0.0275  | 0.0762  | -0.1483 | 0.0459  | 0.306   | 0.0663  | 0.0496 | -0.0051 | 0.0434  | 0.2261  | #N/A |
| Ube4a   | -0.1182 | -0.0878 | -0.0248 | 0.0212  | -0.3109 | -0.0027 | 0.0459 | 0.0593  | 0.0252  | -0.0639 | #N/A |
| Mtor    | -0.065  | -0.0176 | -0.0668 | -0.1465 | -0.4696 | -0.0702 | 0.0457 | 0.0686  | -0.0199 | 0.0394  | #N/A |
| Fbxo4   | -0.3018 | -0.1526 | 0.0472  | 0.3009  | 0.2117  | 0.1706  | 0.0452 | -0.2676 | -0.0505 | -0.0968 | #N/A |
| Ppp2r5a | -0.0298 | 0.2006  | 0.0693  | -0.0428 | -0.4164 | -0.0374 | 0.0446 | 0.2074  | 0.1371  | 0.1108  | #N/A |
| Hspa5   | 0.329   | 0.2614  | 0.1222  | 0.2767  | 0.1907  | 0.1906  | 0.0393 | 0.2479  | 0.0244  | -0.1611 | #N/A |
| Kif26a  | -0.0112 | -0.2482 | 0.1543  | 0.1723  | 0.6304  | 0.2938  | 0.038  | -0.3749 | -0.0712 | -0.3987 | #N/A |
| Socs1   | -0.2105 | -1.3025 | -1.3351 | 0.7175  | 1.4283  | 0.0432  | 0.0374 | -0.7251 | 0.143   | 0.1343  | #N/A |
| Dync1i2 | 0.1491  | 0.2504  | 0.1686  | 0.0384  | 0.4778  | 0.1887  | 0.0351 | 0.0574  | 0.0371  | -0.0158 | #N/A |
| Cul3    | 0.0198  | 0.2099  | 0.111   | 0.1192  | -0.4917 | 0.0779  | 0.0335 | 0.1419  | 0.1012  | 0.0437  | #N/A |
| Sec31a  | -0.0826 | -0.127  | -0.1113 | 0.0647  | -0.4014 | 0.032   | 0.0307 | 0.028   | -0.1261 | -0.0426 | #N/A |
| Psma2   | 0.0285  | -0.0198 | 0.072   | 0.2756  | 0.4841  | 0.0698  | 0.0259 | 0.1503  | 0.1546  | 0.17    | #N/A |
| Fbxw8   | -0.043  | -0.0748 | -0.0812 | 0.1613  | 0.2203  | 0.0793  | 0.0255 | -0.007  | -0.1033 | -0.1925 | #N/A |
| Psmc12  | 0.052   | 0.0667  | 0.1615  | 0.2542  | 0.2214  | 0.1573  | 0.0229 | 0.139   | 0.2089  | 0.183   | #N/A |
| Dctn4   | -0.0275 | 0.1804  | 0.0902  | 0.0119  | -0.3276 | 0.0328  | 0.0221 | 0.0004  | -0.0495 | -0.0385 | #N/A |
| Dctn6   | -0.071  | -0.0832 | -0.0682 | -0.1375 | -0.257  | -0.0535 | 0.0217 | 0.0925  | 0.124   | 0.2762  | #N/A |
| Fbxo3   | -0.0202 | -0.0809 | -0.0938 | 0.012   | -0.4574 | -0.0159 | 0.0209 | 0.0441  | 0.0454  | 0.2424  | #N/A |
| Det1    | -0.4673 | -0.3569 | -0.4109 | 0.0542  | -0.2626 | 0.1282  | 0.0185 | -0.3357 | -0.4142 | -0.0191 | #N/A |
| Mapkap1 | 0.0284  | -0.1088 | -0.1522 | -0.1469 | -0.204  | 0.0134  | 0.0183 | -0.0059 | -0.0821 | -0.1291 | #N/A |
| Cdc16   | 0.0615  | 0.0407  | 0.0827  | 0.2077  | 0.1816  | 0.0905  | 0.018  | -0.0433 | -0.0282 | -0.0484 | #N/A |
| Klhl13  | -0.0774 | -0.1384 | -0.1852 | -0.0826 | -0.7589 | -0.02   | 0.0169 | 0.1112  | 0.1466  | 0.146   | #N/A |
| Fbxo2   | 0.0843  | 0.0191  | -0.1201 | -0.0885 | 0.4135  | 0.0922  | 0.0153 | -0.0229 | 0.2809  | 0.3122  | #N/A |
| Psmc7   | 0.2083  | 0.2503  | 0.2453  | 0.2345  | 0.7238  | 0.1395  | 0.0151 | 0.0971  | 0.0021  | 0.0733  | #N/A |
| Herc2   | -0.0094 | 0.0959  | -0.0731 | -0.2529 | -0.861  | -0.1265 | 0.0138 | 0.037   | -0.0445 | 0.0123  | #N/A |
| Uba3    | 0.0355  | 0.0929  | 0.0163  | 0.0118  | -0.3366 | 0.0752  | 0.0134 | 0.1589  | 0.1469  | 0.2002  | #N/A |
| Ap1g1   | -0.0587 | 0.0457  | -0.0239 | 0.0196  | -0.6317 | -0.0973 | 0.0116 | -0.0306 | -0.0673 | -0.0261 | #N/A |
| Cul5    | -0.161  | -0.0082 | 0.0087  | 0.0038  | -0.3064 | -0.063  | 0.0098 | 0.1066  | 0.0775  | 0.1243  | #N/A |
| Map3k7  | -0.0993 | 0.0775  | 0.028   | 0.0887  | -0.3758 | -0.0147 | 0.0091 | -0.1434 | -0.1484 | -0.1186 | #N/A |
| Ikbkg   | -0.117  | -0.0416 | -0.0377 | 0.0117  | -0.3504 | 0.0097  | 0.0055 | 0.0376  | 0.0078  | 0.146   | #N/A |

|         |         |         |         |         |         |         |           |         |         |         |      |
|---------|---------|---------|---------|---------|---------|---------|-----------|---------|---------|---------|------|
| Foxo3   | 0.0619  | -0.0357 | -0.1408 | -0.2152 | -1.711  | -0.2145 | 0.001     | -0.1376 | -0.2783 | -0.0928 | #N/A |
| Psmc14  | 0.0853  | 0.1283  | 0.0012  | 0.222   | 0.3312  | 0.0343  | 0.0003    | 0.1345  | 0.0342  | 0.084   | #N/A |
| Plcg1   | -0.0531 | -0.0921 | -0.2229 | -0.2841 | -0.6613 | -0.0766 | 1.443E-05 | -0.075  | -0.1864 | -0.2043 | #N/A |
| Raet1e  | 0       | 0       | 0       | 3.0404  | 0       | 0       | 0         | 0       | 0       | 3.3911  | #N/A |
| Cd207   | 0       | 0       | 2.2102  | 0       | 0       | 0       | 0         | 0       | 0       | 0       | #N/A |
| Kif2b   | 0       | 2.9576  | 0       | 3.1507  | 0       | 0       | 0         | 0       | 0       | 0       | #N/A |
| Asb17   | 0       | 0       | 0       | 0       | 0       | 0       | 0         | 0       | 0       | 0       | #N/A |
| Vprbp   | 0.0618  | -0.0549 | -0.0987 | -0.0294 | -0.3315 | -0.1266 | -0.0025   | 0.0605  | 0.1495  | 0.1477  | #N/A |
| Psma5   | -0.1269 | -0.3265 | -0.3275 | 0.0804  | 0.1857  | -0.0385 | -0.0043   | 0.0006  | 0.0483  | 0.1024  | #N/A |
| Psmc6   | 0.0674  | 0.1381  | 0.161   | 0.2537  | 0.0282  | 0.0398  | -0.0082   | 0.1764  | 0.1321  | 0.0117  | #N/A |
| Klhl9   | -0.2012 | -0.0498 | -0.1527 | -0.0979 | -0.572  | -0.0922 | -0.012    | -0.0192 | 0.0115  | -0.0834 | #N/A |
| Psmc5   | 0.2136  | 0.2341  | 0.2648  | 0.1216  | 0.079   | -0.0608 | -0.0124   | 0.027   | 0.0839  | 0.1534  | #N/A |
| Sec24b  | -0.0351 | -0.0202 | -0.0454 | 0.0118  | -0.2967 | 0.0182  | -0.0136   | -0.0534 | -0.136  | -0.2533 | #N/A |
| Dctn1   | 0.0123  | -0.1099 | -0.1282 | -0.1272 | -0.1488 | -0.0969 | -0.0139   | 0.0315  | -0.0191 | 0.0589  | #N/A |
| Akt1    | -0.0447 | -0.1288 | -0.0463 | -0.0348 | -0.2168 | -0.0397 | -0.0146   | -0.053  | -0.1506 | -0.0786 | #N/A |
| Ube2e1  | 0.1519  | 0.1397  | 0.1185  | 0.0339  | -0.4119 | 0.0176  | -0.0149   | 0.1728  | 0.1179  | 0.0762  | #N/A |
| Psmc1   | 0.0266  | 0.1072  | 0.0247  | 0.1783  | 0.7024  | 0.1166  | -0.0217   | 0.0331  | -0.0008 | 0.0888  | #N/A |
| Hectd3  | -0.0009 | -0.15   | -0.1941 | -0.1217 | 0.0329  | 0.0341  | -0.0221   | 0.0546  | 0.036   | 0.0913  | #N/A |
| Enah    | 0.1404  | 0.2504  | 0.1959  | -0.0271 | -0.3824 | -0.0752 | -0.029    | -0.0194 | 0.0236  | 0.0897  | #N/A |
| Ube2d3  | -0.0058 | 0.1146  | 0.0208  | 0.1404  | -0.1562 | -0.0323 | -0.0313   | 0.0864  | 0.0787  | 0.155   | #N/A |
| Ap1b1   | 0.0487  | -0.0086 | 0.0462  | -0.0286 | -0.2656 | -0.1349 | -0.0338   | -0.0527 | -0.085  | 0.0071  | #N/A |
| Fyn     | -0.0505 | 0.0499  | -0.044  | -0.0358 | -0.1627 | 0.1586  | -0.035    | -0.0985 | -0.2164 | -0.208  | #N/A |
| Pik3cb  | -0.1451 | 0.0113  | -0.1431 | -0.0396 | -0.5349 | -0.1518 | -0.035    | -0.1407 | -0.086  | -0.0318 | #N/A |
| Blmh    | -0.0277 | 0.0348  | -0.0407 | -0.0186 | 0.0981  | -0.0573 | -0.0357   | 0.006   | 0.0312  | 0.119   | #N/A |
| Psmc4   | -0.0414 | -0.066  | -0.1401 | 0.1108  | 0.5538  | -0.0098 | -0.0409   | 0.0862  | 0.1337  | 0.3152  | #N/A |
| Fbxo6   | -0.2886 | -0.2441 | 0.0653  | 0.048   | 0.1245  | -0.0594 | -0.0415   | -0.2172 | 0.0584  | -0.239  | #N/A |
| Rbck1   | -0.2084 | -0.3815 | -0.2673 | -0.2765 | -0.2847 | -0.0461 | -0.0417   | -0.2084 | -0.1782 | -0.1432 | #N/A |
| Bad     | 0.0295  | -0.2879 | -0.1752 | 0.0075  | 0.548   | -0.1158 | -0.0424   | -0.1872 | 0.0602  | -0.0456 | #N/A |
| Ube2z   | 0.0112  | -0.0605 | -0.0462 | 0.0662  | 0.015   | -0.1669 | -0.0437   | -0.1024 | -0.1488 | -0.0177 | #N/A |
| Arih2   | 0.1156  | 0.258   | 0.2359  | 0.2353  | -0.2399 | 0.0788  | -0.0439   | -0.033  | -0.0409 | 0.1016  | #N/A |
| Kir3dl2 | 0.7174  | 0.9441  | -0.8059 | 0.6112  | 1.2618  | 0.6543  | -0.047    | 1.0734  | 1.3365  | 1.6618  | #N/A |
| Chuk    | -0.1367 | 0.2676  | 0.2442  | 0.2323  | -0.3123 | -0.0199 | -0.0471   | -0.0782 | -0.0523 | -0.1714 | #N/A |
| Cd3d    | 0.3111  | 0.2187  | 0.2934  | -0.2194 | 0.4783  | -0.7863 | -0.0476   | -0.3926 | -0.1425 | 0.1505  | #N/A |
| Lrsam1  | -0.0913 | -0.2344 | -0.2507 | -0.1021 | -0.0475 | -0.1032 | -0.048    | -0.1158 | -0.0656 | -0.1621 | #N/A |
| Park2   | -0.0597 | -0.0393 | 0.0182  | -0.1915 | -0.4041 | -0.285  | -0.0499   | -0.2585 | -0.0535 | -0.2437 | #N/A |



|          |         |         |         |         |         |         |         |         |         |         |      |
|----------|---------|---------|---------|---------|---------|---------|---------|---------|---------|---------|------|
| Pja1     | 0.0696  | -0.0267 | 0.0241  | -0.1195 | -0.5126 | -0.1696 | -0.0503 | 0.0701  | 0.0829  | 0.2108  | #N/A |
| Anapc5   | 0.0153  | 0.0753  | -0.0656 | -0.1939 | -0.0544 | 0.0209  | -0.0511 | 0.0358  | -0.0746 | 0.0536  | #N/A |
| Ube2r2   | 0.0652  | 0.1286  | 0.1016  | 0.0582  | 0.6444  | 0.0413  | -0.0515 | -0.0354 | -0.028  | 0.1066  | #N/A |
| Psmc1    | 0.1196  | 0.1635  | 0.1181  | 0.1628  | 0.6296  | 0.0134  | -0.0554 | 0.0848  | 0.0409  | 0.1024  | #N/A |
| Sec23a   | -0.129  | 0.015   | -0.0376 | -0.1487 | -0.9349 | -0.1743 | -0.0591 | -0.0212 | -0.0448 | -0.0263 | #N/A |
| Rnf34    | 0.0742  | 0.1061  | 0.1406  | -0.0846 | -0.2948 | -0.0778 | -0.061  | 0.046   | 0.1231  | 0.1765  | #N/A |
| PsmA7    | 0.0336  | -0.0451 | -0.0106 | 0.0813  | 1.1516  | 0.0399  | -0.0624 | 0.052   | 0.0744  | 0.0484  | #N/A |
| PsmD11   | 0.0016  | -0.0469 | -0.0127 | 0.2396  | 0.801   | -0.0695 | -0.0624 | -0.0613 | -0.1404 | -0.1187 | #N/A |
| Dync1li2 | 0.0137  | 0.0733  | 0.056   | 0.0138  | -0.4794 | -0.1694 | -0.063  | -0.0349 | -0.0172 | 0.0964  | #N/A |
| Creb1    | -0.1335 | -0.1209 | -0.1018 | -0.0676 | -0.0744 | -0.0454 | -0.0634 | 0.0176  | 0.0165  | 0.0741  | #N/A |
| Wsb1     | -0.2134 | 0.0198  | -0.0146 | 0.0292  | -0.3441 | 0.1553  | -0.0669 | 0.0082  | -0.0153 | -0.0618 | #N/A |
| Dynll2   | 0.126   | 0.0582  | -0.0089 | -0.0588 | -0.2753 | -0.1764 | -0.0678 | -0.1515 | 0.0819  | 0.1392  | #N/A |
| Fbxw11   | -0.0395 | 0.0987  | 0.072   | 0.0745  | -0.4819 | -0.1054 | -0.0698 | -0.0682 | -0.0575 | 0.0398  | #N/A |
| Ube2d1   | -0.002  | -0.0166 | 0.0248  | -0.0594 | -0.1743 | 0.033   | -0.0726 | 0.0002  | -0.0143 | -0.0804 | #N/A |
| Rnf123   | -0.0824 | -0.2081 | -0.2239 | -0.2597 | -0.5074 | -0.1971 | -0.0761 | -0.0007 | -0.1998 | 0.0344  | #N/A |
| Kras     | 0.0462  | 0.1109  | 0.0463  | 0.121   | -0.1894 | -0.0705 | -0.0763 | 0.0094  | -0.0248 | 0.0739  | #N/A |
| Keap1    | -0.0332 | -0.159  | -0.1066 | -0.0346 | 0.4067  | 0.0128  | -0.0775 | -0.1382 | -0.0391 | -0.0624 | #N/A |
| Dctn5    | -0.0471 | -0.0325 | -0.1255 | -0.0274 | -0.1235 | -0.0265 | -0.0815 | -0.0891 | -0.2261 | -0.1626 | #N/A |
| Ube2v2   | 0.1656  | 0.0986  | 0.1136  | -0.0049 | -0.4946 | -0.195  | -0.0826 | 0.0908  | 0.1534  | 0.0121  | #N/A |
| Trim11   | -0.0819 | -0.0452 | -0.0277 | -0.211  | 0.2652  | -0.0427 | -0.0852 | -0.1125 | -0.1513 | 0.015   | #N/A |
| Uba5     | 0.0533  | 0.1373  | 0.1948  | 0.2409  | 0.2683  | -0.0386 | -0.0854 | 0.0086  | 0.0203  | -0.0178 | #N/A |
| Psmc4    | 0.077   | 0.031   | 0.0514  | 0.1759  | 0.5456  | 0.0636  | -0.0887 | 0.0055  | -0.0126 | 0.0818  | #N/A |
| Cdc42    | 0.0165  | 0.0605  | -0.0303 | -0.0367 | 0.0552  | -0.093  | -0.0921 | -0.0046 | -0.0672 | 0.0797  | #N/A |
| PsmB3    | 0.0983  | -0.0691 | -0.0797 | 0.2503  | 1.0023  | 0.0583  | -0.0923 | -0.1316 | -0.0083 | -0.0239 | #N/A |
| Ube3c    | -0.0215 | 0.129   | 0.0704  | 0.0305  | -0.5811 | -0.0881 | -0.0927 | 0.0012  | -0.0607 | -0.0332 | #N/A |
| Calr     | 0.1147  | -0.0476 | -0.3208 | -0.127  | 0.4465  | 0.1858  | -0.0948 | -0.0692 | -0.161  | -0.05   | #N/A |
| Ppp2ca   | 0.0028  | 0.1012  | 0.0332  | -0.1332 | -0.3209 | -0.1349 | -0.0966 | -0.0092 | -0.037  | -0.0101 | #N/A |
| PsmB2    | -0.049  | -0.2104 | -0.1684 | 0.1747  | 0.5407  | -0.0081 | -0.0988 | -0.1109 | -0.1791 | -0.0876 | #N/A |
| Tsc2     | -0.1016 | -0.1027 | -0.1237 | -0.177  | -0.2205 | -0.1759 | -0.1003 | -0.1733 | -0.2762 | -0.2549 | #N/A |
| Lrrc41   | -0.0679 | -0.0667 | -0.0724 | 0.1246  | -0.4663 | -0.2002 | -0.1006 | -0.2689 | -0.0598 | -0.0849 | #N/A |
| Ap2a1    | -0.0621 | -0.2171 | -0.2715 | -0.2063 | -0.4939 | -0.1805 | -0.1013 | -0.1213 | -0.1939 | -0.2298 | #N/A |
| Akt2     | -0.0848 | -0.0641 | -0.2288 | -0.1609 | 0.131   | -0.1044 | -0.1015 | -0.197  | -0.2316 | -0.1028 | #N/A |
| Rnf4     | -0.0484 | 0.1057  | 0.1421  | 0.224   | -0.3902 | -0.2585 | -0.1015 | -0.1645 | -0.1442 | 0.0352  | #N/A |
| Ube2h    | 0.0563  | 0.1109  | 0.1717  | 0.0529  | -0.2009 | -0.0829 | -0.104  | -0.0704 | -0.0613 | 0.039   | #N/A |
| PsmB1    | 0.0832  | -0.0412 | 0.062   | 0.1062  | 0.8215  | 0.0766  | -0.1048 | 0.0796  | 0.1013  | 0.1821  | #N/A |

|         |         |         |         |         |         |         |         |         |         |           |      |
|---------|---------|---------|---------|---------|---------|---------|---------|---------|---------|-----------|------|
| Sae1    | 0.0237  | 0.0109  | -0.0253 | -0.078  | 0.3027  | -0.0709 | -0.1048 | -0.0403 | -0.0924 | 0.0557    | #N/A |
| Actr1a  | 0.0142  | -0.0171 | 0.0081  | -0.0678 | -0.3296 | -0.127  | -0.107  | -0.0541 | -0.1463 | 2.885E-05 | #N/A |
| Rnf25   | 0.0034  | 0.1254  | 0.0385  | -0.0588 | 0.0878  | 0.0598  | -0.1077 | 0.0203  | -0.0131 | -0.0041   | #N/A |
| Kif3b   | -0.0373 | 0.004   | -0.0884 | -0.1621 | -0.6459 | -0.1486 | -0.1098 | -0.0339 | -0.154  | 0.1265    | #N/A |
| Ube2s   | 0.1178  | 0.0872  | 0.1312  | 0.1691  | 0.7316  | -0.0427 | -0.11   | -0.0982 | -0.0274 | -0.1509   | #N/A |
| Casp9   | -0.0077 | -0.0165 | -0.0406 | -0.1684 | -0.0434 | -0.2426 | -0.1139 | -0.2262 | -0.1792 | -0.1329   | #N/A |
| Pja2    | -0.0661 | 0.0105  | -0.113  | -0.3268 | -0.9012 | -0.2757 | -0.115  | 0.0451  | -0.0157 | 0.0471    | #N/A |
| Evl     | -0.0738 | -0.0164 | -0.0298 | -0.2066 | -0.2353 | -0.2183 | -0.1192 | -0.217  | -0.2707 | -0.2461   | #N/A |
| Dzip3   | 0.0103  | -0.0009 | -0.1541 | -0.0875 | -0.2057 | -0.1898 | -0.1194 | 0.0958  | 0.1343  | 0.1641    | #N/A |
| Ube2n   | 0.0071  | 0.0771  | -0.0056 | -0.0916 | -0.2677 | -0.1667 | -0.1201 | -0.0476 | -0.0426 | -0.0365   | #N/A |
| Asb13   | -0.037  | 0.0383  | -0.0189 | -0.1649 | -0.3035 | -0.2383 | -0.1233 | -0.1662 | -0.1767 | -0.1182   | #N/A |
| Mkrm1   | 0.0509  | 0.1032  | 0.0776  | -0.0854 | -0.2999 | -0.1667 | -0.1274 | -0.062  | -0.1386 | 0.0296    | #N/A |
| Ppp2r5b | -0.0051 | 0.0598  | -0.0364 | -0.161  | -0.1131 | -0.2205 | -0.1289 | -0.1682 | -0.1746 | -0.0631   | #N/A |
| Ube2q2  | -0.0131 | 0.05    | 0.0451  | -0.0857 | -0.5833 | -0.1663 | -0.1307 | 0.0494  | 0.1061  | 0.1381    | #N/A |
| Anapc11 | 0.0608  | -0.0931 | -0.1206 | 0.0071  | 0.6594  | -0.0256 | -0.1358 | -0.0394 | -0.0309 | -0.0985   | #N/A |
| Rnf41   | 0.0173  | -0.0148 | -0.075  | -0.1262 | -0.2111 | -0.1505 | -0.1371 | -0.1202 | -0.0948 | -0.0754   | #N/A |
| Asb8    | 0.0065  | -0.1906 | -0.1353 | -0.1422 | 0.2384  | -0.137  | -0.1383 | -0.1511 | -0.1087 | 0.0576    | #N/A |
| Pten    | -0.0167 | 0.0925  | -0.0181 | -0.0705 | -0.5328 | -0.1853 | -0.1407 | -0.1289 | -0.1817 | -0.1522   | #N/A |
| Psma4   | -0.1027 | -0.1375 | -0.1628 | 0.0018  | 0.8354  | -0.0148 | -0.1443 | 0.009   | 0.0564  | 0.0799    | #N/A |
| Kif2a   | -0.0219 | -0.0022 | -0.0926 | -0.0458 | -0.1641 | -0.1333 | -0.145  | -0.0741 | -0.082  | -0.1587   | #N/A |
| Sh3gl2  | 0.0991  | 0.2009  | 0.2899  | 0.0403  | -0.5559 | -0.2359 | -0.1465 | -0.1784 | -0.1667 | -0.2103   | #N/A |
| Them4   | 0.0314  | -0.2063 | -0.2688 | -0.0326 | 0.0959  | -0.1449 | -0.149  | -0.0188 | 0.0025  | -0.0104   | #N/A |
| Cul2    | -0.0296 | -0.1122 | -0.1155 | -0.0679 | -0.4655 | -0.1233 | -0.1537 | -0.0577 | -0.0502 | -0.1956   | #N/A |
| Psm7    | 0.0065  | -0.0325 | -0.0708 | 0.1263  | 0.4344  | -0.0039 | -0.1549 | -0.0481 | 0.0047  | 0.1064    | #N/A |
| Ube2j1  | -0.0912 | 0.0731  | 0.0803  | -0.0821 | -0.6261 | -0.1858 | -0.1551 | -0.0689 | -0.166  | -0.0744   | #N/A |
| Asb7    | -0.147  | -0.1335 | -0.0055 | 0.047   | -0.2357 | -0.0846 | -0.1568 | -0.1977 | -0.2821 | -0.0774   | #N/A |
| Sec61g  | 0.1283  | 0.1562  | 0.2035  | 0.3675  | 1.3783  | 0.2382  | -0.1621 | 0.0768  | 0.0286  | 0.2434    | #N/A |
| Stim1   | -0.0599 | -0.1206 | -0.1213 | -0.2789 | -0.466  | -0.1932 | -0.165  | -0.144  | -0.1905 | -0.0526   | #N/A |
| Ppp2r5e | -0.1038 | -0.023  | -0.1258 | -0.1202 | -0.5457 | -0.2016 | -0.1666 | -0.0684 | -0.1011 | -0.0814   | #N/A |
| Ube2w   | 0.0575  | 0.0245  | -0.0383 | -0.0684 | -0.4092 | -0.1023 | -0.1689 | 0.1637  | 0.0322  | 0.1039    | #N/A |
| Cdc34   | -0.0998 | -0.2107 | -0.0632 | 0.1256  | 0.4897  | -0.1507 | -0.169  | -0.1857 | -0.0976 | -0.0208   | #N/A |
| Btrc    | 0.0073  | -0.0528 | -0.1193 | -0.2321 | -0.62   | -0.2936 | -0.1694 | -0.0245 | -0.1157 | 0.0182    | #N/A |
| Klc1    | -0.003  | -0.0446 | -0.1109 | -0.1239 | -0.4974 | -0.2012 | -0.1765 | -0.02   | -0.0448 | 0.2293    | #N/A |
| Ap2m1   | 0.0499  | 0.107   | 0.1199  | -0.0338 | -0.1723 | -0.2224 | -0.1784 | -0.1013 | -0.1552 | -0.0061   | #N/A |
| Ube2q1  | 0.0002  | -0.0424 | -0.023  | -0.1385 | -0.1452 | -0.1229 | -0.1839 | -0.1191 | -0.0991 | -0.1629   | #N/A |

|         |         |         |         |         |         |         |         |         |         |         |       |
|---------|---------|---------|---------|---------|---------|---------|---------|---------|---------|---------|-------|
| Ap2s1   | 0.0459  | 0.2181  | 0.0375  | -0.1096 | 0.7598  | -0.0653 | -0.1895 | -0.1623 | -0.1805 | -0.2699 | #N/A  |
| Dctn2   | 0.0367  | 0.0143  | 0.001   | -0.053  | 0.1894  | -0.0943 | -0.1901 | -0.0229 | -0.1058 | -0.0577 | #N/A  |
| Ube2g2  | 0.18    | 0.2996  | 0.4083  | 0.2111  | -0.0369 | -0.1942 | -0.192  | -0.1546 | -0.1538 | 0.0852  | #N/A  |
| Tceb1   | 0.0499  | 0.15    | 0.0878  | -0.0826 | -0.1952 | -0.1544 | -0.1926 | 0.0026  | -0.0367 | 0.0615  | #N/A  |
| Pdpk1   | -0.0499 | 0.0584  | -0.0323 | -0.2407 | -0.9029 | -0.3415 | -0.1938 | -0.1298 | -0.1981 | -0.2198 | #N/A  |
| Psmc8   | 0.0635  | 0.0081  | 0.0072  | -0.0961 | 0.2599  | -0.0851 | -0.196  | -0.2053 | -0.2213 | -0.3167 | #N/A  |
| Vhl     | 0.0556  | 0.1177  | 0.0184  | -0.0783 | -0.0582 | -0.1452 | -0.1987 | -0.1346 | -0.2904 | 0.062   | #N/A  |
| Ube2k   | 0.0152  | -0.0019 | -0.0632 | -0.0639 | -0.1711 | -0.1697 | -0.2053 | -0.0569 | -0.0969 | -0.026  | #N/A  |
| Smurf1  | -0.0152 | 0.0039  | -0.0687 | -0.1078 | -0.6162 | -0.2374 | -0.2071 | -0.2033 | -0.2679 | -0.3417 | #N/A  |
| Osbpl1a | -0.0929 | -0.0564 | -0.1367 | -0.3714 | -0.6573 | -0.3697 | -0.219  | -0.0589 | -0.1808 | 0.0846  | #N/A  |
| Psmc3   | -0.1288 | -0.1886 | -0.3314 | 0.108   | 0.1152  | -0.1694 | -0.2233 | -0.2143 | -0.1795 | -0.1699 | #N/A  |
| Mlst8   | -0.0736 | 0.051   | -0.0431 | -0.217  | -0.4431 | -0.3355 | -0.2288 | -0.1956 | -0.3058 | -0.1964 | #N/A  |
| Ap2b1   | -0.0353 | 0.001   | -0.1683 | -0.3204 | -0.7349 | -0.4006 | -0.2327 | -0.2058 | -0.3001 | -0.2629 | #N/A  |
| Ppp2r5c | -0.0854 | 0.0686  | -0.0296 | -0.1847 | -0.4516 | -0.2921 | -0.2378 | -0.1411 | -0.2178 | -0.1658 | #N/A  |
| Prkacb  | -0.171  | -0.1216 | -0.2658 | -0.3382 | -1.2216 | -0.299  | -0.2385 | -0.0788 | -0.1553 | -0.0222 | #N/A  |
| Ube2o   | -0.0667 | -0.1585 | -0.2223 | -0.2658 | -0.3327 | -0.3233 | -0.2392 | -0.1821 | -0.2093 | -0.1872 | #N/A  |
| Nr4a1   | 1.0704  | 0.2239  | -0.0814 | -0.4506 | -0.7038 | -0.3898 | -0.2403 | -0.1203 | 0.4267  | 0.9167  | Nr4a1 |
| Calm2   | -0.0231 | 0.0145  | -0.1395 | -0.4467 | -0.375  | -0.1833 | -0.2411 | 0.0624  | -0.0193 | 0.1003  | #N/A  |
| Pik3r2  | -0.1418 | -0.1413 | -0.2466 | -0.2488 | -0.3392 | -0.2419 | -0.2446 | -0.1374 | -0.2608 | -0.1065 | #N/A  |
| Trim32  | -0.1648 | -0.1496 | -0.2076 | -0.374  | -0.7865 | -0.2872 | -0.2515 | -0.1021 | -0.13   | -0.0673 | #N/A  |
| Stub1   | -0.0135 | -0.1894 | -0.2109 | -0.1438 | 0.0335  | -0.1469 | -0.2595 | -0.1587 | -0.0965 | 0.076   | #N/A  |
| Dnm1    | -0.0598 | -0.114  | -0.1535 | -0.3991 | -0.7595 | -0.2902 | -0.2606 | -0.1594 | -0.2487 | -0.0631 | #N/A  |
| Asb16   | -0.5856 | 0.1383  | -0.133  | -0.5297 | -0.5955 | -0.1473 | -0.2607 | 0.7965  | 0.9555  | 0.325   | #N/A  |
| Ppp2r5d | -0.0466 | 0.0086  | 0.1197  | -0.0684 | -0.1471 | -0.2798 | -0.2637 | -0.2815 | -0.2751 | -0.2769 | #N/A  |
| Dctn3   | 0.0855  | -0.0562 | 0.0296  | -0.0075 | 0.2358  | -0.218  | -0.2643 | -0.1162 | -0.2124 | -0.1555 | #N/A  |
| Zap70   | -0.0196 | 0.2095  | -0.4348 | -0.7114 | 0.2475  | -0.6123 | -0.2656 | -0.2438 | -0.0188 | -0.0426 | #N/A  |
| Ube2b   | 0.0038  | 0.0055  | -0.0609 | -0.1824 | -0.3555 | -0.3232 | -0.267  | -0.1614 | -0.0635 | -0.0193 | #N/A  |
| Kifap3  | 0.0081  | -0.0014 | -0.1216 | -0.334  | -0.0579 | -0.2792 | -0.268  | -0.125  | -0.1945 | -0.1486 | #N/A  |
| Rnf220  | -0.1646 | -0.2336 | -0.2778 | -0.2463 | -0.4394 | -0.2763 | -0.2692 | -0.2216 | -0.1984 | -0.1527 | #N/A  |
| Ube2g1  | -0.1338 | -0.0421 | -0.0594 | -0.0556 | -0.5825 | -0.2366 | -0.2769 | -0.1629 | -0.1902 | -0.2374 | #N/A  |
| Ube2a   | -0.0457 | -0.1365 | -0.2065 | -0.22   | -0.3808 | -0.2532 | -0.2778 | -0.1892 | -0.2588 | -0.1866 | #N/A  |
| Tceb2   | 0.0967  | -0.0019 | 0.0834  | 0.0952  | 1.0314  | 0.0263  | -0.2821 | -0.0578 | -0.035  | -0.023  | #N/A  |
| Dync1i1 | 0.0267  | 0.0073  | -0.026  | -0.1886 | -0.2431 | -0.3357 | -0.284  | -0.1424 | -0.1244 | -0.0204 | #N/A  |
| Ppp2cb  | -0.0532 | 0.0524  | -0.0231 | -0.0878 | -0.263  | -0.1911 | -0.2912 | -0.1421 | -0.1146 | -0.1555 | #N/A  |
| Pak1    | -0.0266 | 0.0379  | -0.095  | -0.3288 | -0.6091 | -0.3648 | -0.293  | -0.134  | -0.253  | -0.1024 | #N/A  |

|         |         |         |         |         |         |         |         |         |         |         |        |
|---------|---------|---------|---------|---------|---------|---------|---------|---------|---------|---------|--------|
| Rapgef4 | 0.0988  | 0.3057  | 0.3007  | 0.0802  | -0.9114 | -0.4037 | -0.2938 | -0.0333 | -0.3485 | 0.0733  | #N/A   |
| Psmb5   | -0.072  | -0.2791 | -0.3245 | -0.0404 | 0.2718  | -0.2405 | -0.3009 | -0.1312 | -0.2864 | -0.1295 | #N/A   |
| Ube2e3  | -0.0985 | 0.0034  | -0.0362 | -0.0893 | -0.2716 | -0.2141 | -0.3024 | -0.2224 | -0.124  | -0.2996 | #N/A   |
| Ube3b   | -0.131  | -0.0901 | -0.1116 | -0.1226 | -0.6643 | -0.3724 | -0.3057 | -0.3112 | -0.4854 | -0.2566 | #N/A   |
| Crtam   | 0.3595  | 0.7744  | -0.1645 | 2.4895  | 0.9082  | -0.2678 | -0.3141 | -1.5966 | 0.5176  | -0.267  | #N/A   |
| Ppp2r1a | 0.0095  | -0.0955 | -0.1653 | -0.1959 | -0.1258 | -0.3294 | -0.3143 | -0.1904 | -0.2024 | 0.366   | #N/A   |
| Prkaca  | -0.0372 | -0.1909 | -0.2318 | -0.2076 | -0.4747 | -0.3737 | -0.3162 | -0.2343 | -0.2668 | -0.2459 | #N/A   |
| Cxadr   | 0.1399  | 0.5654  | 0.5832  | 0.0521  | -0.4679 | -0.3264 | -0.3185 | -0.4464 | -0.2412 | -0.2616 | #N/A   |
| Asb1    | -0.1479 | -0.1705 | -0.1402 | -0.2366 | -0.6766 | -0.4615 | -0.3216 | -0.1823 | -0.2338 | -0.1932 | #N/A   |
| Ap2a2   | -0.0823 | -0.1298 | -0.1526 | -0.2047 | -0.3131 | -0.3298 | -0.3254 | -0.2999 | -0.3209 | -0.286  | #N/A   |
| Grb2    | 0.0168  | -0.0152 | -0.0421 | -0.1772 | -0.1066 | -0.3826 | -0.3284 | -0.3767 | -0.3794 | -0.3095 | #N/A   |
| Npepps  | -0.0263 | -0.0272 | -0.1644 | -0.1605 | 0.0985  | -0.297  | -0.3332 | -0.2994 | -0.3083 | -0.3847 | #N/A   |
| Trim37  | -0.0992 | 0.0684  | -0.1197 | -0.4094 | -1.0778 | -0.4781 | -0.3353 | -0.1624 | -0.2888 | -0.2177 | #N/A   |
| Rbx1    | -0.117  | -0.2344 | -0.2445 | -0.0732 | 0.0136  | -0.3288 | -0.3398 | -0.221  | -0.2291 | -0.2529 | #N/A   |
| Akt3    | -0.2181 | -0.0165 | -0.2217 | -0.4044 | -1.0856 | -0.5043 | -0.3503 | -0.1723 | -0.2924 | -0.292  | #N/A   |
| Akt1s1  | -0.2696 | -0.4461 | -0.5251 | -0.1394 | 0.0612  | -0.1911 | -0.3528 | -0.3858 | -0.2403 | -0.0202 | #N/A   |
| Cdkn1a  | 1.1811  | 1.7311  | 1.641   | 2.1773  | 1.5199  | 0.3539  | -0.3531 | -0.5891 | -0.5845 | -0.5515 | Cdkn1a |
| Rnf182  | 0.0484  | 0.1319  | 0.1811  | -0.1534 | 0.263   | -0.1704 | -0.3537 | -0.3241 | -0.1788 | -0.1894 | #N/A   |
| Rap1gap | -0.0664 | -0.11   | -0.0828 | -0.3584 | -0.715  | -0.3376 | -0.3547 | -0.3833 | -0.3812 | -0.3607 | #N/A   |
| Zbtb16  | 0.719   | 0.8032  | 0.3527  | 0.4714  | -0.0431 | -0.3574 | -0.3704 | -0.1961 | -0.2133 | -0.1365 | Zbtb16 |
| Cd4     | -0.8405 | -1.0117 | -1.5877 | -2.9474 | -2.3622 | -0.6532 | -0.3728 | -0.9612 | -0.6964 | -1.0381 | Cd4    |
| Kif5a   | 0.046   | 0.1923  | 0.1622  | 0.1006  | -0.6674 | -0.523  | -0.3739 | -0.1362 | -0.2835 | 0.0444  | #N/A   |
| Ywhab   | -0.0546 | -0.0296 | -0.092  | -0.175  | -0.1669 | -0.339  | -0.376  | -0.2488 | -0.2923 | -0.2652 | #N/A   |
| Calm3   | -0.0326 | -0.0692 | -0.1542 | -0.4157 | -0.1913 | -0.4526 | -0.3792 | -0.2299 | -0.2442 | -0.0611 | #N/A   |
| Ywhaz   | -0.1104 | -0.1263 | -0.3351 | -0.3412 | -0.4476 | -0.4518 | -0.3847 | -0.2855 | -0.3501 | -0.141  | #N/A   |
| Ube2m   | 0.0247  | -0.0853 | -0.058  | -0.0003 | 0.2632  | -0.3562 | -0.3867 | -0.3241 | -0.3235 | -0.3163 | #N/A   |
| Fbxo44  | 0.0353  | -0.0732 | -0.0226 | -0.1415 | 0.1937  | -0.2657 | -0.3924 | -0.189  | -0.2816 | -0.2532 | #N/A   |
| Gsk3a   | -0.1166 | -0.1129 | -0.1396 | -0.2624 | -0.4361 | -0.4524 | -0.394  | -0.35   | -0.3193 | -0.2217 | #N/A   |
| Ube2e2  | -0.017  | -0.0716 | -0.1671 | -0.3551 | -0.3309 | -0.4569 | -0.3946 | -0.2303 | -0.3175 | -0.0678 | #N/A   |
| Klc2    | -0.0813 | -0.3429 | -0.4008 | -0.4189 | -0.5316 | -0.4707 | -0.3974 | -0.1923 | -0.2195 | -0.0314 | #N/A   |
| Ap1s1   | -0.0012 | -0.0206 | -0.1997 | -0.2407 | 0.0165  | -0.3382 | -0.4064 | -0.255  | -0.3254 | 0.2422  | #N/A   |
| Kif3c   | -0.1193 | -0.1649 | -0.2378 | -0.2955 | -0.9738 | -0.4739 | -0.4069 | -0.3118 | -0.3803 | -0.2585 | #N/A   |
| Asb6    | 0.0072  | -0.2185 | -0.1466 | -0.0192 | -0.1645 | -0.3494 | -0.4075 | -0.3432 | -0.3296 | -0.35   | #N/A   |
| Calm1   | -0.0021 | 0.0531  | -0.0815 | -0.3136 | -0.3869 | -0.449  | -0.4155 | -0.2536 | -0.3661 | -0.2158 | #N/A   |
| Prkcb   | -0.1078 | -0.0503 | -0.2218 | -0.5834 | -0.8916 | -0.6087 | -0.4173 | -0.3761 | -0.4962 | -0.3699 | Prkcb  |

|          |         |         |         |         |         |         |         |         |         |         |         |
|----------|---------|---------|---------|---------|---------|---------|---------|---------|---------|---------|---------|
| Fbxw7    | 0.0556  | -0.1774 | -0.371  | -0.4329 | -0.4399 | -0.4483 | -0.4252 | -0.2701 | -0.3758 | -0.139  | #N/A    |
| Rasgrp1  | -0.1237 | 0.0226  | -0.0881 | -0.4521 | -1.0014 | -0.5046 | -0.4288 | -0.3923 | -0.5837 | -0.4176 | #N/A    |
| Asb11    | -0.4247 | -0.1243 | -0.4723 | -0.5482 | -0.1636 | -0.3834 | -0.4527 | -0.1993 | -0.3008 | 0.0229  | #N/A    |
| Src      | -0.0701 | -0.0588 | -0.0515 | -0.1433 | -0.3246 | -0.4111 | -0.4582 | -0.3902 | -0.4517 | -0.3101 | #N/A    |
| Ubox5    | -0.265  | -0.2326 | -0.1824 | -0.2981 | -1.0064 | -0.6594 | -0.486  | -0.4328 | -0.6462 | -0.6727 | #N/A    |
| Hras     | -0.0208 | -0.1443 | -0.1782 | -0.3391 | -0.1097 | -0.501  | -0.5146 | -0.3436 | -0.3932 | -0.4522 | #N/A    |
| Sptbn2   | -0.2341 | -0.2537 | -0.4522 | -0.6616 | -1.4037 | -0.7894 | -0.5321 | -0.3875 | -0.6594 | -0.4979 | #N/A    |
| Rps6kb2  | -0.1276 | -0.2023 | -0.1667 | -0.2343 | 0.1039  | -0.3164 | -0.537  | -0.3637 | -0.4691 | -0.3788 | #N/A    |
| Sec61a2  | -0.0581 | -0.0852 | -0.0771 | -0.1755 | -0.3823 | -0.3883 | -0.5411 | -0.3214 | -0.3769 | -0.354  | #N/A    |
| Rasgrp2  | -0.2144 | -0.6542 | -0.6303 | -0.9415 | -0.8612 | -0.7173 | -0.5438 | -0.4496 | -0.4518 | -0.2853 | Rasgrp2 |
| Grap2    | -0.2487 | -0.1407 | -0.0691 | -0.1792 | 0.1885  | -0.8888 | -0.546  | -0.8439 | -0.8208 | -0.4212 | Grap2   |
| Dynll1   | 0.057   | -0.1584 | -0.2182 | -0.2214 | 0.1325  | -0.3152 | -0.5573 | -0.2684 | -0.3981 | -0.3661 | #N/A    |
| Actr1b   | -0.1621 | -0.303  | -0.3298 | -0.3659 | -0.6196 | -0.6531 | -0.5604 | -0.4831 | -0.3529 | 0.7137  | #N/A    |
| Rap1gap2 | -0.11   | -0.0989 | -0.0204 | -0.1602 | -0.973  | -0.689  | -0.6316 | -0.5395 | -0.6888 | -0.4797 | #N/A    |
| Trim9    | -0.0842 | -0.191  | -0.3176 | -0.471  | -0.7984 | -0.7274 | -0.8155 | -0.5377 | -0.7798 | -0.6846 | #N/A    |
| Fbxo27   | -0.4546 | -0.8063 | -0.7392 | -0.497  | -1.2653 | -0.9658 | -0.8164 | -0.5782 | -0.6359 | -0.5902 | #N/A    |
| Asb15    | -0.8656 | -1.0277 | -0.9168 | -0.4624 | -1.0535 | -4.9245 | -1.3482 | -1.0177 | -2.4325 | -0.58   | #N/A    |
| Asb9     | -3.2137 | -3.2137 | -0.476  | -3.2137 | -3.2137 | -3.2137 | -3.2137 | -3.2137 | -3.2137 | -3.2137 | #N/A    |
| Kir3dl1  | -0.5501 | -0.3793 | -3.3313 | -3.3313 | 0.5397  | -3.3313 | -3.3313 | -3.3313 | -3.3313 | 0.0597  | #N/A    |

# M1

| variable | Log2(1h<br>vs. pre) | Log2(3h<br>vs. pre) | Log2(6h<br>vs. pre) | Log2(1d<br>vs. pre) | Log2(3d<br>vs. pre) | Log2(1w<br>vs. pre) | Log2(2w<br>vs. pre) | Log2(1m<br>vs. pre) | Log2(2m<br>vs. pre) | Log2(6m<br>vs. pre) | sig in ipsil |
|----------|---------------------|---------------------|---------------------|---------------------|---------------------|---------------------|---------------------|---------------------|---------------------|---------------------|--------------|
| Msr1     | 0.7661              | 1.9148              | 2.9975              | 6.0052              | 6.8634              | 6.4221              | 5.5621              | 3.4625              | 5.0246              | 0.6762              | Msr1         |
| Plbd1    | -0.3607             | 0.5347              | -1.213              | 1.7424              | 4.702               | 2.1335              | 4.3592              | 2.236               | 3.4207              | 0.6                 | Plbd1        |
| Pik3ap1  | -0.189              | 0.9416              | 0.7573              | 1.4043              | 2.0066              | 3.2664              | 3.4835              | 1.5863              | 1.8758              | 0.434               | Pik3ap1      |
| Tgfb1    | 0.2683              | 0.704               | 1.6805              | 3.0172              | 4.805               | 3.1379              | 3.2901              | 1.7671              | 2.3935              | 1.128               | Tgfb1        |
| Cxcr4    | 0.4181              | 0.5122              | 1.2272              | 0.46                | 2.8053              | 2.8755              | 3.0972              | 1.8644              | 2.3442              | 1.0342              | Cxcr4        |
| Slc7a7   | -0.1549             | 0.1504              | 0.1683              | 1.1786              | 3.1614              | 3.1971              | 3.0735              | 1.6722              | 1.3284              | 0.6771              | Slc7a7       |
| Aif1     | 0.2041              | 0.1244              | 0.0169              | 0.7316              | 3.5881              | 2.9864              | 3.0277              | 1.6723              | 1.4656              | 0.6108              | Aif1         |
| Cfh      | -0.0337             | 0.4562              | 0.3161              | 0.7987              | 1.1953              | 2.1516              | 2.6967              | 1.4478              | 1.7261              | 0.6173              | Cfh          |
| Tifab    | -0.3064             | -1.2465             | -0.9669             | 0.7016              | 2.4811              | 2.0614              | 2.4657              | 1.2752              | 0.7313              | 0.394               | Tifab        |
| Tor3a    | -0.0896             | 0.0515              | 0.3653              | 0.5692              | 1.366               | 1.6781              | 2.1125              | 0.9116              | 1.0754              | 0.4934              | Tor3a        |
| Slco2b1  | -0.2339             | -0.0043             | -0.2095             | 0.2753              | 1.5797              | 1.7132              | 1.8207              | 0.6664              | 0.4704              | 0.1379              | Slco2b1      |
| Fgd2     | -0.3493             | -0.5078             | -1.0372             | -0.1639             | 1.8714              | 1.8618              | 1.7045              | 0.4685              | 0.3929              | 0.0336              | Fgd2         |
| Abca9    | -0.4224             | -0.2567             | -0.5737             | -0.9713             | -0.5123             | 0.9723              | 1.4733              | 0.6241              | 0.4386              | -0.0516             | Abca9        |
| Txnip    | 1.1422              | 1.096               | 0.6951              | 0.6856              | 0.8546              | 1.2427              | 1.437               | 0.8309              | 0.8443              | 0.8242              | Txnip        |
| Axl      | -0.0614             | 0.1872              | 0.1624              | 0.1856              | 0.5778              | 0.9366              | 1.413               | 0.5552              | 0.4506              | 0.0017              | Axl          |
| Ada      | 1.9422              | 2.4373              | 1.6388              | 2.3399              | 1.6453              | 2.2218              | 1.3011              | 1.2158              | 1.1277              | 1.0432              | #N/A         |
| Colec12  | 0.1171              | 0.1548              | 0.0841              | -0.1046             | 0.2823              | 0.9882              | 1.1282              | 0.4025              | 0.7279              | -0.0075             | Colec12      |
| Maf      | -0.0073             | 0.0344              | -0.1599             | -0.1086             | 1.2103              | 1.2498              | 1.1046              | 0.4598              | 0.5852              | 0.4025              | Maf          |
| Plxdc2   | 0.0615              | 0.0712              | -0.1456             | -0.033              | 0.7363              | 1.2086              | 1.0955              | 0.476               | 0.3074              | 0.1659              | Plxdc2       |
| P2ry13   | -0.6751             | -0.9548             | -0.8223             | -0.6894             | 0.487               | 1.2694              | 1.0314              | 0.3388              | -0.1498             | -0.2098             | P2ry13       |
| Filip1l  | 0.9118              | 1.0357              | 0.7743              | 1.0065              | 1.5368              | 0.9954              | 0.8257              | 0.4351              | 0.977               | 0.483               | Filip1l      |
| Rcbtb2   | -0.0386             | -0.0381             | -0.0858             | 0.0789              | 0.6915              | 0.8881              | 0.8109              | 0.346               | 0.3658              | 0.0361              | Rcbtb2       |
| Gatm     | 0.2214              | 0.2041              | 0.3441              | 0.5328              | 0.7599              | 0.7146              | 0.7639              | 0.6262              | 0.6593              | 0.8138              | Gatm         |
| Marco    | 0.1416              | -3.3313             | -3.3313             | 0.6417              | 0.9494              | 1.4716              | 0.6772              | -1.1508             | 0.6807              | 2.2604              | #N/A         |
| Rapsn    | 0.1338              | -0.2053             | -0.5605             | -0.4226             | 2.4421              | 1.2059              | 0.5753              | 1.6603              | 0.4927              | -0.2822             | #N/A         |
| Rcn1     | -0.0124             | 0.0415              | -0.0839             | -0.098              | 0.2723              | 0.459               | 0.5403              | 0.4426              | 0.5707              | 0.6313              | #N/A         |
| Acss1    | 0.044               | 0.1529              | -0.0494             | -0.006              | 0.2321              | 0.5284              | 0.5237              | 0.2988              | 0.3148              | 0.3472              | #N/A         |
| Ptger3   | -0.5827             | 0.7139              | 0.0221              | 0.6813              | 0.0915              | -0.0381             | 0.4943              | 0.5954              | 0.1762              | 0.6361              | #N/A         |
| Gja1     | 0.0724              | 0.2358              | 0.1188              | -0.3094             | -0.1705             | 0.45                | 0.4781              | 0.317               | 0.3441              | 0.2059              | #N/A         |
| Dst      | 0.0227              | 0.2093              | 0.061               | -0.0114             | -0.3731             | 0.2682              | 0.4083              | 0.342               | 0.2962              | 0.3063              | #N/A         |

|          |         |         |         |         |         |         |         |         |         |         |      |
|----------|---------|---------|---------|---------|---------|---------|---------|---------|---------|---------|------|
| Kcnj10   | 0.2231  | 0.2072  | 0.186   | 0.0816  | 0.5185  | 0.452   | 0.4001  | 0.1356  | 0.1831  | -0.0475 | #N/A |
| Sfi1     | -0.2268 | -0.4755 | -0.3964 | -0.2758 | 0.0113  | 0.3787  | 0.3516  | 0.2005  | 0.1406  | 0.0693  | #N/A |
| Lcorl    | -0.0657 | 0.0979  | 0.0218  | 0.1002  | -0.5935 | 0.4575  | 0.3242  | 0.2073  | 0.3229  | 0.2797  | #N/A |
| Pla2g16  | 0.1425  | 0.1627  | 0.2451  | -0.1064 | 0.5541  | 0.2159  | 0.3081  | 0.3566  | 0.3564  | 0.5379  | #N/A |
| Srd5a3   | -0.169  | -0.1894 | -0.1765 | -0.0306 | 0.5123  | 0.1362  | 0.2535  | -0.0568 | -0.2257 | 0.014   | #N/A |
| Ocel1    | -0.1094 | -0.1532 | -0.2688 | 0.281   | 0.0841  | 0.3649  | 0.2429  | -0.1671 | 0.0209  | -0.0918 | #N/A |
| Tm7sf3   | 0.0217  | 0.0679  | 0.1782  | 0.0541  | 0.2007  | 0.189   | 0.1942  | 0.0934  | 0.0849  | 0.1344  | #N/A |
| Arsb     | -0.24   | -0.1614 | -0.3653 | -0.4359 | -0.561  | 0.1694  | 0.1846  | -0.0714 | -0.1602 | 0.0812  | #N/A |
| Cap1     | -0.0217 | 0.0496  | -0.0039 | -0.0881 | -0.3072 | 0.1505  | 0.1783  | -0.0638 | -0.139  | 0.0458  | #N/A |
| Lama3    | -0.009  | 0.1645  | 0.1269  | 0.0471  | -0.9016 | 0.0272  | 0.1205  | 0.1098  | 0.2616  | -0.1177 | #N/A |
| Fam135a  | -0.1021 | 0.185   | 0.2504  | 0.3588  | -0.571  | 0.027   | 0.1176  | 0.0731  | 0.1747  | 0.2237  | #N/A |
| Hmgn3    | 0.1281  | -0.0195 | 0.0268  | 0.1123  | 0.5519  | 0.2226  | 0.101   | 0.2521  | 0.2584  | 0.3944  | #N/A |
| Bckdhb   | 0.2211  | 0.2695  | 0.1694  | -0.0204 | 0.3192  | 0.0033  | 0.1     | 0.1305  | 0.164   | 0.1516  | #N/A |
| Haus2    | 0.0193  | 0.2736  | 0.3724  | 0.395   | 0.1415  | 0.0408  | 0.092   | -0.0089 | -0.0603 | -0.0829 | #N/A |
| Lyplal1  | -0.0172 | 0.1064  | -0.2586 | 0.1136  | 0.2023  | 0.1158  | 0.0463  | 0.1187  | 0.1263  | 0.2614  | #N/A |
| Crim1    | 0.0035  | 0.1179  | 0.117   | 0.0156  | -0.3295 | -0.0904 | 0.0238  | 0.0328  | 0.1252  | -0.0231 | #N/A |
| Tubb2b   | -0.0801 | -0.0124 | -0.1885 | 0.259   | 0.903   | 0.0571  | 0.0205  | -0.0507 | -0.0734 | 0.1315  | #N/A |
| Glo1     | 0.0793  | 0.1242  | 0.1294  | 0.0527  | 0.0481  | -0.0114 | -0.013  | 0.1196  | 0.1551  | 0.1639  | #N/A |
| Slc35a1  | -0.08   | -0.2259 | 0.0249  | 0.041   | -0.0151 | -0.06   | -0.0361 | -0.0834 | -0.0312 | -0.2034 | #N/A |
| Comt     | 0.0709  | 0.4468  | 0.628   | 0.3094  | 0.531   | -0.0752 | -0.0642 | -0.3174 | -0.4621 | -0.4255 | Comt |
| Marcksl1 | -0.1113 | -0.1289 | -0.1272 | 0.1507  | 0.5858  | 0.0378  | -0.0774 | -0.2471 | -0.3487 | -0.4548 | #N/A |
| Nrcam    | -0.1468 | 0.0307  | -0.2083 | -0.2222 | -0.6595 | -0.2838 | -0.0797 | -0.0656 | -0.2145 | -0.1817 | #N/A |
| Acyp2    | 0.1573  | 0.0733  | 0.1695  | 0.0531  | 0.2652  | 0.0908  | -0.1136 | 0.2136  | 0.3581  | 0.2988  | #N/A |
| Rab10    | -0.1033 | -0.0467 | -0.0085 | 0.0857  | -0.1705 | -0.1544 | -0.1413 | -0.2291 | -0.2244 | -0.26   | #N/A |
| Ttc3     | 0.1123  | 0.0688  | -0.0752 | -0.224  | 0.0642  | -0.1925 | -0.1448 | 0.0975  | 0.0513  | 0.1318  | #N/A |
| Rmnd1    | -0.4489 | -0.2385 | -0.296  | -0.4788 | -1.464  | -0.4482 | -0.1518 | -0.2576 | -0.5797 | -0.4284 | #N/A |
| Rfx3     | -0.2082 | -0.2909 | -0.3139 | -0.4018 | -0.9972 | -0.1846 | -0.1537 | -0.0938 | -0.2381 | -0.2687 | #N/A |
| Gnb4     | -0.3497 | -0.2497 | -0.349  | -0.6358 | -0.7642 | -0.3352 | -0.1785 | -0.1896 | -0.5187 | -0.2487 | #N/A |
| Cadm1    | -0.0486 | -0.0066 | -0.2158 | -0.241  | -0.2365 | -0.1436 | -0.1901 | -0.1266 | -0.1044 | -0.0692 | #N/A |
| Galnt11  | -0.0856 | -0.0627 | -0.0428 | -0.2043 | -0.5857 | -0.2087 | -0.2212 | -0.1411 | -0.2244 | -0.0346 | #N/A |
| Ppp2r5c  | -0.0854 | 0.0686  | -0.0296 | -0.1847 | -0.4516 | -0.2921 | -0.2378 | -0.1411 | -0.2178 | -0.1658 | #N/A |
| Capn5    | -0.1477 | -0.1742 | -0.119  | -0.2329 | -0.5824 | -0.2145 | -0.2517 | -0.2002 | -0.2362 | -0.292  | #N/A |
| Rasal2   | -0.1524 | -0.1903 | -0.0949 | -0.2135 | -0.4758 | -0.3622 | -0.2811 | -0.1683 | -0.2712 | -0.1374 | #N/A |
| Fam124a  | 0.0017  | -0.0888 | -0.0393 | 0.0533  | 0.4068  | -0.2856 | -0.3028 | -0.2051 | -0.2888 | -0.0553 | #N/A |
| Cxcl14   | 0.0196  | 0.0028  | -0.0251 | -0.1707 | -0.0663 | -0.2773 | -0.3076 | -0.154  | -0.1092 | -0.0139 | #N/A |

|          |         |         |         |         |         |         |         |         |         |         |        |
|----------|---------|---------|---------|---------|---------|---------|---------|---------|---------|---------|--------|
| Nat8l    | 0.0339  | -0.0927 | -0.0877 | -0.2701 | -0.375  | -0.5599 | -0.3589 | -0.2999 | -0.3077 | -0.2832 | #N/A   |
| Gda      | -0.1075 | 0.1052  | -0.203  | -0.3971 | -0.7856 | -0.4793 | -0.3836 | -0.2715 | -0.3216 | -0.1966 | #N/A   |
| Hddc3    | -0.4949 | -0.1448 | -0.0106 | -0.6211 | -0.6684 | -0.3605 | -0.3901 | -0.4593 | -0.4246 | -0.3151 | #N/A   |
| Ogfrl1   | -0.0056 | 0.0794  | 0.0499  | -0.1969 | -0.3022 | -0.281  | -0.3914 | -0.2789 | -0.3042 | -0.2584 | #N/A   |
| Alad     | 0.0072  | 0.0978  | 0.1358  | -0.0633 | -0.0113 | -0.364  | -0.394  | -0.2647 | -0.1193 | -0.0999 | #N/A   |
| Atp6v0e2 | -0.0481 | -0.0848 | -0.1841 | -0.2632 | -0.3127 | -0.4686 | -0.395  | -0.239  | -0.375  | -0.2534 | #N/A   |
| Malat1   | 0.1903  | 0.0042  | 0.0249  | -0.0199 | 0.4889  | -0.166  | -0.4167 | -0.4271 | -0.3071 | -0.6091 | Malat1 |
| Eno2     | -0.0502 | -0.2474 | -0.2228 | -0.3451 | -0.2985 | -0.4504 | -0.4813 | -0.3289 | -0.3616 | -0.2763 | #N/A   |
| Abhd1    | 0.2496  | 1.0593  | 0.71    | 0.0175  | -2.0803 | -1.0324 | -0.5389 | -0.2395 | -0.381  | -0.4148 | #N/A   |
| Cnrip1   | -0.178  | -0.2352 | -0.3754 | -0.4689 | -0.6105 | -0.6139 | -0.6177 | -0.3585 | -0.4868 | -0.4053 | #N/A   |



## M2

| Gene    | Log2(1h vs. | Log2(3h vs. | Log2(6h vs. | Log2(1d vs. | Log2(3d vs. | Log2(1w vs. | Log2(2w vs. | Log2(1m | Log2(2m | Log2(6m | sig     |
|---------|-------------|-------------|-------------|-------------|-------------|-------------|-------------|---------|---------|---------|---------|
| Mefv    | 0           | 3.8969      | 4.0463      | 5.7507      | 7.1478      | 5.2012      | 8.0138      | 6.4572  | 6.8929  | 3.1171  | #N/A    |
| Lgals3  | 0.8257      | 2.6773      | 3.4996      | 5.52        | 8.1282      | 7.4613      | 7.5691      | 5.7922  | 7.4658  | 3.2286  | Lgals3  |
| C3      | 0.8447      | 0.8876      | 1.7096      | 3.8823      | 4.5371      | 4.4705      | 7.4944      | 7.0415  | 6.9883  | 4.3129  | C3      |
| Tlr1    | 1.9487      | 2.3039      | 3.6223      | 5.1507      | 5.8936      | 5.6984      | 6.4204      | 4.6636  | 4.8257  | 2.9806  | Tlr1    |
| Zbp1    | -0.5331     | 0.6716      | 1.1793      | 2.7338      | 5.0991      | 4.8533      | 5.8396      | 2.6826  | 3.7232  | 0.4052  | Zbp1    |
| C6      | -3.2137     | -0.2616     | -0.476      | -0.1733     | -3.2137     | 4.1699      | 5.7873      | 3.5248  | 4.378   | 1.1719  | C6      |
| Tlr8    | -0.2574     | 1.2349      | 1.1538      | 2.0557      | 2.9423      | 4.7659      | 5.3657      | 2.9828  | 4.1781  | 1.4328  | Tlr8    |
| Cfb     | 0.1761      | 0.6469      | 1.2358      | 1.9488      | 4.3045      | 3.3789      | 5.1609      | 3.0315  | 3.4742  | 1.1049  | Cfb     |
| Ccr2    | -0.3674     | 0.0329      | 1.2749      | 2.7114      | 5.8447      | 2.517       | 4.8435      | 2.9787  | 3.5483  | 0.7228  | Ccr2    |
| Crp     | 4.1779      | 5.9266      | 5.0214      | 4.9982      | 4.2808      | 4.7312      | 4.5069      | 2.9049  | 4.0193  | 6.0723  | #N/A    |
| Irf7    | -0.9881     | -0.1007     | 0.3028      | 1.6833      | 3.4004      | 3.6251      | 4.3957      | 1.0866  | 2.2267  | 0.4927  | Irf7    |
| Nlrc5   | 0.8492      | 0.9125      | 1.4234      | 2.5647      | 3.4347      | 3.4339      | 4.3613      | 2.2794  | 2.0624  | 0.4439  | Nlrc5   |
| Tlr2    | 0.6189      | 0.3678      | 1.3078      | 2.621       | 3.3866      | 3.6821      | 4.2345      | 2.5776  | 2.1941  | 0.1433  | Tlr2    |
| Casp4   | 0.2755      | 2.6087      | 2.2995      | 2.5059      | 3.8273      | 3.4255      | 4.056       | 2.6703  | 3.1208  | 0.9095  | Casp4   |
| Cd180   | -0.7752     | -0.4444     | 0.0056      | 1.831       | 4.0125      | 4.2502      | 4.0292      | 2.0064  | 1.9065  | 1.3796  | Cd180   |
| Ctss    | 0.1695      | 0.3303      | 0.4172      | 0.6469      | 2.7569      | 3.2102      | 3.8063      | 2.3761  | 2.4669  | 1.0223  | Ctss    |
| C8a     | 2.9925      | 3.0229      | 4.7905      | 4.0536      | 0           | 0           | 3.7121      | 4.0685  | 4.6282  | 4.2546  | #N/A    |
| Ly86    | 0.1167      | -0.0633     | 0.183       | 1.5538      | 3.72        | 3.2955      | 3.6561      | 2.1493  | 1.858   | 1.5055  | Ly86    |
| C1qa    | 0.1612      | 0.0516      | 0.0721      | 0.9521      | 3.5243      | 3.496       | 3.5266      | 2.1347  | 1.7529  | 0.5517  | C1qa    |
| Tlr9    | -0.2833     | 0.899       | 0.2556      | 0.2398      | 1.8085      | 2.6724      | 3.4608      | 1.7462  | 1.4262  | 0.1852  | Tlr9    |
| C1qc    | 0.1625      | -0.1769     | -0.1325     | 0.9669      | 3.3915      | 3.591       | 3.4605      | 1.9799  | 1.7534  | 0.3681  | C1qc    |
| C8b     | 3.6119      | 4.789       | 4.8097      | 4.6137      | 4.8461      | 5.2796      | 3.45        | 4.0685  | 3.5033  | 0       | #N/A    |
| Ticam2  | -0.0645     | 0.1077      | 0.9109      | 1.4316      | 3.3854      | 3.3283      | 3.4248      | 1.7133  | 2.31    | 1.1721  | Ticam2  |
| C1qb    | 0.0471      | 0.08        | 0.2249      | 1.0503      | 3.3913      | 3.428       | 3.4071      | 2.0186  | 1.8061  | 0.5325  | C1qb    |
| Unc93b1 | -0.1182     | -0.0727     | -0.2863     | 0.5207      | 2.4272      | 3.0223      | 3.3432      | 1.778   | 1.7819  | 0.8928  | Unc93b1 |
| Tlr4    | 0.7638      | 1.8018      | 1.4446      | 2.3045      | 2.5044      | 3.0521      | 3.2772      | 2.1437  | 2.5266  | 1.0763  | Tlr4    |
| Tlr7    | 0.7562      | 1.0712      | 0.6201      | 1.3413      | 2.7084      | 3.2237      | 3.2531      | 1.7155  | 1.2473  | 0.1425  | Tlr7    |
| Btk     | -0.8065     | 0.088       | 0.2109      | 1.2909      | 2.7785      | 3.2267      | 3.2103      | 1.6259  | 1.9415  | 0.6263  | Btk     |
| Pycard  | -0.3802     | -0.7271     | 0.1085      | 1.8235      | 3.3971      | 3.2135      | 3.1604      | 1.7252  | 1.7955  | 0.9743  | Pycard  |
| Uba7    | 0.2762      | -0.4042     | -0.5826     | 0.658       | 2.9385      | 3.1005      | 3.0304      | 1.7508  | 1.3938  | 0.5119  | Uba7    |
| Saa1    | -0.0522     | 1.0228      | 2.195       | 1.2285      | 2.2294      | 2.2127      | 2.9448      | 0.9663  | 0.8488  | -3.3313 | #N/A    |

|          |         |         |         |         |        |        |        |        |         |         |          |
|----------|---------|---------|---------|---------|--------|--------|--------|--------|---------|---------|----------|
| Dhx58    | -0.7402 | -0.5558 | 0.1691  | 0.3177  | 2.2703 | 2.446  | 2.9039 | 0.7246 | 1.0187  | -0.5628 | Dhx58    |
| Tlr6     | -0.1488 | 1.1364  | 1.0618  | 1.3357  | 2.6767 | 2.4495 | 2.8377 | 1.4665 | 1.5966  | 0.5306  | Tlr6     |
| Cd14     | 1.1662  | 1.8458  | 2.8967  | 4.1347  | 2.6672 | 2.0606 | 2.7357 | 1.5652 | 1.3045  | 0.438   | Cd14     |
| Cfh      | -0.0337 | 0.4562  | 0.3161  | 0.7987  | 1.1953 | 2.1516 | 2.6967 | 1.4478 | 1.7261  | 0.6173  | Cfh      |
| Card9    | 0.6373  | 0.014   | 0.2608  | 1.5883  | 3.286  | 2.9098 | 2.6049 | 1.599  | 1.6632  | 1.2231  | Card9    |
| Ikbke    | -1.0379 | -0.2322 | 0.1581  | 0.4158  | 1.7928 | 2.0787 | 2.553  | 0.9766 | 1.3547  | 0.2606  | Ikbke    |
| Lbp      | 0.3249  | 0.3348  | 0.6394  | 1.3091  | 1.415  | 2.2643 | 2.5515 | 1.4962 | 1.7231  | 1.2275  | Lbp      |
| Ripk3    | -2.0652 | -0.2242 | -0.2746 | 2.487   | 3.372  | 2.1525 | 2.508  | 0.0689 | 1.1152  | -5.0577 | #N/A     |
| Nfkb2    | 0.8118  | 0.7774  | 1.4816  | 1.778   | 2.1182 | 2.012  | 2.4713 | 1.2823 | 1.3342  | 0.9029  | Nfkb2    |
| Ddx58    | -0.1369 | 0.2678  | 0.4539  | 1.1503  | 1.5262 | 2.1705 | 2.4472 | 0.9498 | 1.1338  | 0.4594  | Ddx58    |
| Plcg2    | 0.0416  | 0.1069  | 0.2146  | 0.9007  | 2.5255 | 2.5945 | 2.4345 | 1.2421 | 1.1621  | 0.19    | Plcg2    |
| C2       | -0.7135 | -0.0149 | -0.3098 | -0.2839 | 0.0633 | 0.8076 | 2.424  | 1.1649 | 1.4989  | 1.4056  | C2       |
| C9       | 0       | 0       | 0       | 0       | 0      | 0      | 2.3603 | 0      | 0       | 0       | #N/A     |
| Birc3    | 0.7179  | 1.2693  | 1.7439  | 1.7973  | 0.9239 | 1.6379 | 2.3024 | 0.9852 | 1.6051  | 0.8209  | Birc3    |
| Trim25   | 0.414   | 0.8296  | 0.7364  | 1.4088  | 1.9253 | 1.8107 | 2.199  | 0.9093 | 1.1782  | 0.8182  | Trim25   |
| Ifih1    | 0.0602  | 0.0308  | 0.3101  | 0.8169  | 1.4282 | 1.9266 | 2.1918 | 0.7918 | 0.9625  | 0.4026  | Ifih1    |
| Casp8    | -0.347  | 0.1121  | 0.2744  | 1.1457  | 2.3855 | 2.2463 | 2.043  | 0.8587 | 0.7602  | 0.1516  | Casp8    |
| Irak4    | 0.1993  | -0.0307 | 0.3061  | 1.2048  | 2.1175 | 1.8254 | 2.0305 | 1.0446 | 0.8366  | 0.1879  | Irak4    |
| Casp1    | 0.0165  | 0.0809  | -0.4584 | 0.8009  | 2.032  | 1.8643 | 2.0171 | 1.0428 | 1.3881  | 0.7977  | Casp1    |
| Ly96     | -0.0274 | 0.948   | 0.6932  | 1.1724  | 2.6934 | 1.8794 | 1.999  | 0.5911 | 1.6085  | 0.8137  | Ly96     |
| Irf1     | 0.5341  | 0.4075  | 0.7728  | 0.7658  | 1.1705 | 1.4809 | 1.9872 | 0.729  | 0.8473  | 0.4975  | Irf1     |
| Pros1    | -0.0276 | 0.5575  | 0.7962  | 1.6019  | 2.0034 | 2.0537 | 1.9533 | 1.1254 | 1.0718  | 0.6329  | Pros1    |
| Ctsb     | 0.067   | 0.1213  | 0.1953  | 0.4376  | 1.8553 | 2.172  | 1.8242 | 0.8212 | 0.8626  | 0.2342  | Ctsb     |
| Nlrp3    | -0.8664 | -0.1147 | 0.3069  | 1.0311  | 1.627  | 1.7825 | 1.767  | 0.4134 | -0.0773 | -0.6841 | Nlrp3    |
| Cdk1     | -0.1329 | -0.3615 | -0.6316 | 0.297   | 4.8475 | 3.4254 | 1.7322 | 0.0793 | -0.0379 | -0.1608 | Cdk1     |
| Lgmn     | 0.1931  | 0.1831  | 0.2877  | 0.5865  | 2.3139 | 2.1247 | 1.7293 | 0.7063 | 0.6684  | 0.2614  | Lgmn     |
| Mapkapk3 | -0.0389 | 0.2543  | 0.496   | 1.0539  | 1.729  | 1.3536 | 1.7145 | 0.6816 | 0.7111  | 0.0941  | Mapkapk3 |
| Irak3    | -0.1324 | 1.1329  | 1.3121  | 1.4959  | 0.5978 | 1.5528 | 1.6573 | 1.1491 | 1.2136  | 1.025   | Irak3    |
| Ube2l6   | -0.3016 | -0.2114 | -0.2775 | 0.2585  | 1.2609 | 1.1985 | 1.5274 | 0.3784 | 0.617   | 0.0806  | Ube2l6   |
| Nod1     | 0.1653  | 0.1913  | 0.472   | 0.5453  | 0.8582 | 1.3011 | 1.4924 | 0.7722 | 0.8468  | 0.6776  | Nod1     |
| Ccr6     | -0.5785 | 0.8125  | -0.2416 | -2.965  | -2.965 | -2.965 | 1.4515 | 0.9231 | -0.2178 | -2.965  | #N/A     |
| Txnip    | 1.1422  | 1.096   | 0.6951  | 0.6856  | 0.8546 | 1.2427 | 1.437  | 0.8309 | 0.8443  | 0.8242  | Txnip    |
| Nlrc4    | 0.1632  | 0.7324  | 0.4155  | -0.2551 | 1.6301 | 1.3605 | 1.4156 | 0.361  | 1.2016  | -0.1465 | Nlrc4    |
| P2rx7    | -0.1931 | 0.5166  | 0.3693  | 0.3268  | 1.1686 | 1.1719 | 1.3473 | 0.6349 | 0.5861  | 0.2325  | P2rx7    |
| Myd88    | 0.1427  | 0.6496  | 0.8947  | 1.5325  | 1.6629 | 1.2331 | 1.3126 | 0.5756 | 0.6461  | 0.1863  | Myd88    |

|          |         |         |         |         |         |         |        |         |         |         |          |
|----------|---------|---------|---------|---------|---------|---------|--------|---------|---------|---------|----------|
| Tnfaip3  | 0.5592  | 0.6704  | 1.3669  | 0.7997  | 0.3682  | 0.8772  | 1.3053 | 0.7509  | 0.7769  | -0.0145 | Tnfaip3  |
| Rps6ka1  | -0.1912 | -0.1454 | 0.1421  | 0.3075  | 1.0974  | 1.3522  | 1.3034 | 0.5857  | 0.4514  | 0.353   | Rps6ka1  |
| Ripk1    | -0.0118 | 0.7567  | 0.5272  | 0.9695  | 1.2085  | 1.2449  | 1.2786 | 0.3715  | 0.7827  | 0.1845  | Ripk1    |
| Isg15    | -0.2446 | -0.4773 | -0.0905 | 0.4216  | 1.4166  | 0.9318  | 1.2471 | -0.6849 | -0.1566 | -0.9316 | Isg15    |
| Pstpip1  | -0.1011 | 0.0361  | 0.3426  | 0.6033  | 1.36    | 0.7688  | 1.2346 | 0.5548  | 1.1812  | 0.0492  | Pstpip1  |
| Ctsk     | 0.2443  | 0.0874  | -0.2047 | 0.3518  | -0.1209 | 1.0469  | 1.1868 | 0.326   | 1.4638  | 0.326   | Ctsk     |
| Cfi      | -3.9021 | -3.9021 | 0.704   | -3.9021 | 3.1968  | 1.5636  | 1.1702 | -0.014  | 1.2653  | 0.1585  | #N/A     |
| Art1     | -0.2211 | -3.2137 | -0.4902 | -3.2137 | -3.2137 | -0.3699 | 1.1402 | -3.2137 | -0.7216 | -3.2137 | #N/A     |
| Rnf125   | 1.4952  | 2.3657  | 1.5589  | 2.9364  | 2.0159  | 1.0669  | 1.1357 | 1.0255  | 1.265   | 1.2791  | Rnf125   |
| Mbl2     | 0.0344  | 0.0579  | -0.2274 | 0.9478  | -2.965  | -2.965  | 1.1144 | -2.965  | 0.7429  | 0.426   | #N/A     |
| Aim2     | 0.2248  | 0.2489  | 0.2702  | 0.3068  | 1.5728  | 1.2097  | 1.1099 | 0.3559  | 0.3311  | -0.3176 | Aim2     |
| Mavs     | -0.2032 | -0.0386 | 0.2475  | 0.5925  | 0.8534  | 1.0976  | 1.032  | 0.7462  | 0.6551  | 0.5245  | Mavs     |
| Tlr3     | -0.0775 | 0.125   | 0.0671  | 0.1351  | 0.2072  | 0.8386  | 0.9948 | 0.6571  | 0.6043  | 0.3708  | Tlr3     |
| Ticam1   | 0.4479  | 0.2924  | 0.2075  | 0.4845  | 1.0139  | 0.6926  | 0.9047 | 0.3975  | 0.4865  | 0.2741  | Ticam1   |
| Ager     | -1.3364 | -1.3094 | -0.8427 | -1.028  | 0.5827  | 0.4468  | 0.8801 | 0.1219  | -0.4111 | -1.8336 | #N/A     |
| Rnf135   | 0.1641  | -0.1347 | -0.3036 | 0.0321  | 0.62    | 0.7506  | 0.8397 | 0.3023  | 0.1185  | 0.1914  | Rnf135   |
| Dnm2     | 0.1518  | 0.1045  | 0.2428  | 0.5617  | 0.743   | 1.0083  | 0.8372 | 0.4215  | 0.2937  | 0.1721  | Dnm2     |
| Map3k1   | 0.0123  | 0.0918  | 0.2772  | 0.3391  | 0.4397  | 0.5683  | 0.8095 | 0.0667  | 0.1432  | -0.2737 | Map3k1   |
| Mapkapk2 | 0.1558  | 0.3629  | 0.5005  | 0.7397  | 0.8672  | 0.6126  | 0.748  | 0.1472  | 0.1353  | -0.0994 | Mapkapk2 |
| Fadd     | -0.4382 | -0.247  | -0.5202 | 0.1626  | 0.8338  | 0.8144  | 0.6477 | 0.2721  | 0.1089  | -0.3497 | Fadd     |
| Sigirr   | -0.087  | -0.7127 | 0.173   | 1.0169  | 1.3988  | 0.2573  | 0.6417 | 0.6483  | 0.2061  | -0.1192 | #N/A     |
| Capza1   | 0.025   | 0.2414  | 0.3302  | 0.5425  | 0.2096  | 0.6544  | 0.6408 | 0.2823  | 0.3894  | 0.0645  | Capza1   |
| Ripk2    | 0.4624  | 0.5364  | 0.5257  | 0.3085  | 0.4632  | 0.6776  | 0.6383 | 0.1336  | 0.3871  | 0.381   | Ripk2    |
| Masp2    | 0.8552  | 1.8133  | 1.5074  | 0.3285  | 0.8503  | -0.0134 | 0.6108 | 0.2451  | 0.3933  | 0.2725  | #N/A     |
| Rela     | 0.1259  | 0.0987  | 0.3783  | 0.5899  | 0.5953  | 0.6446  | 0.5912 | 0.1803  | 0.1615  | 0.0465  | Rela     |
| Masp1    | 0.0209  | 0.1079  | 0.2739  | 0.3853  | 0.4604  | 0.5987  | 0.5683 | 0.0449  | 0.2712  | 0.249   | #N/A     |
| Atf1     | 0.0175  | 0.1451  | 0.2852  | 0.4837  | 0.1251  | 0.4891  | 0.4785 | -0.1366 | 0.2436  | -0.0835 | #N/A     |
| Tirap    | 0.2031  | 1.1415  | 1.7768  | 1.188   | 1.1784  | 0.581   | 0.4396 | 0.0252  | 0.1743  | -0.421  | Tirap    |
| Casp2    | 0.0749  | 0.4454  | 0.4129  | 0.0943  | 0.2096  | 0.4019  | 0.3902 | 0.2263  | 0.3105  | 0.4085  | #N/A     |
| Peli2    | 0.078   | 0.2728  | 0.3513  | 0.1574  | 0.431   | 0.2801  | 0.3743 | 0.1158  | 0.1065  | 0.104   | #N/A     |
| Irf3     | -0.0255 | -0.1523 | 0.0536  | 0.1218  | 0.6719  | 0.5417  | 0.3249 | 0.305   | -0.0773 | 0.0006  | #N/A     |
| S100b    | 0.1395  | 0.1326  | 0.1973  | -0.0068 | 0.5585  | 0.0788  | 0.3034 | 0.3085  | 0.345   | 0.5035  | #N/A     |
| Capza2   | 0.0574  | 0.1734  | 0.1591  | 0.0514  | -0.0951 | 0.2621  | 0.2974 | 0.1526  | 0.1067  | 0.0651  | #N/A     |
| Irak2    | 0.3482  | 0.2653  | 0.0191  | -0.0736 | -0.0268 | 0.35    | 0.2596 | -0.0254 | -0.1725 | -0.0837 | #N/A     |
| Eea1     | 0.059   | 0.0721  | 0.1258  | 0.1771  | 0.4764  | 0.2246  | 0.2547 | 0.2061  | 0.2004  | 0.0404  | #N/A     |



|          |         |         |         |         |         |         |         |         |         |         |      |
|----------|---------|---------|---------|---------|---------|---------|---------|---------|---------|---------|------|
| Ifna2    | 0       | 2.9576  | 0       | 0       | 0       | 0       | 0       | 0       | 0       | 0       | #N/A |
| Ifna6    | 0       | 0       | 3.0882  | 0       | 0       | 0       | 0       | 0       | 0       | 0       | #N/A |
| Ifna1    | 0       | 0       | 2.8529  | 0       | 0       | 0       | 0       | 0       | 0       | 0       | #N/A |
| Ifna16   | 2.3865  | 0       | 0       | 0       | 0       | 0       | 0       | 0       | 0       | 0       | #N/A |
| Defa3    | 0       | 0       | 0       | 0       | 0       | 0       | 0       | 0       | 0       | 0       | #N/A |
| Defa4    | 0       | 0       | 0       | 0       | 0       | 0       | 0       | 0       | 0       | 0       | #N/A |
| Defa5    | 0       | 0       | 0       | 0       | 0       | 0       | 0       | 0       | 0       | 0       | #N/A |
| Defa6    | 0       | 0       | 0       | 0       | 0       | 0       | 0       | 0       | 0       | 0       | #N/A |
| Ifna14   | 0       | 0       | 0       | 0       | 0       | 0       | 0       | 0       | 0       | 0       | #N/A |
| Ifna4    | 0       | 0       | 0       | 0       | 0       | 0       | 0       | 0       | 0       | 0       | #N/A |
| Ifna5    | 0       | 0       | 0       | 0       | 0       | 0       | 0       | 0       | 0       | 0       | #N/A |
| Ifna7    | 0       | 0       | 0       | 0       | 0       | 0       | 0       | 0       | 0       | 0       | #N/A |
| Ifnb1    | 0       | 0       | 0       | 0       | 0       | 0       | 0       | 0       | 0       | 0       | #N/A |
| Mef2a    | -0.032  | 0.0259  | 0.0164  | -0.0808 | -0.536  | -0.047  | -0.0031 | -0.0607 | -0.1453 | -0.112  | #N/A |
| Mapk3    | -0.1472 | -0.1438 | -0.0757 | -0.1944 | 0.1587  | 0.1079  | -0.0159 | -0.0851 | -0.1177 | 0.1387  | #N/A |
| Cnpy3    | -0.0462 | -0.0793 | -0.3066 | -0.2084 | -0.0424 | -0.0983 | -0.0248 | -0.0102 | -0.0384 | 0.0029  | #N/A |
| Panx1    | 0.0216  | 0.0499  | -0.1438 | 0.1047  | 0.0392  | -0.0511 | -0.0294 | -0.0158 | 0.1095  | 0.2361  | #N/A |
| Ube2d3   | -0.0058 | 0.1146  | 0.0208  | 0.1404  | -0.1562 | -0.0323 | -0.0313 | 0.0864  | 0.0787  | 0.155   | #N/A |
| Crebbp   | 0.0827  | -0.0461 | -0.0174 | -0.0061 | 0.2267  | -0.0326 | -0.0331 | -0.0442 | -0.1811 | -0.1575 | #N/A |
| Sike1    | -0.2056 | -0.1829 | -0.2037 | -0.0822 | -0.6157 | 0.0014  | -0.0362 | -0.0733 | -0.1778 | -0.1067 | #N/A |
| Bcl2     | 0.1311  | 0.026   | -0.14   | -0.1408 | 0.1943  | -0.0193 | -0.0448 | 0.0003  | 0.0729  | 0.084   | #N/A |
| Chuk     | -0.1367 | 0.2676  | 0.2442  | 0.2323  | -0.3123 | -0.0199 | -0.0471 | -0.0782 | -0.0523 | -0.1714 | #N/A |
| Atg5     | -0.1863 | -0.2156 | -0.2663 | -0.2381 | -0.0943 | -0.0386 | -0.055  | -0.1254 | -0.0609 | -0.192  | #N/A |
| Mapk14   | -0.1131 | -0.0391 | -0.1383 | -0.1065 | -0.5281 | -0.1799 | -0.0578 | -0.1353 | -0.2746 | -0.1402 | #N/A |
| Creb1    | -0.1335 | -0.1209 | -0.1018 | -0.0676 | -0.0744 | -0.0454 | -0.0634 | 0.0176  | 0.0165  | 0.0741  | #N/A |
| Map2k2   | -0.0221 | -0.192  | -0.3545 | -0.1388 | 0.975   | -0.0224 | -0.0685 | -0.193  | -0.1719 | -0.1338 | #N/A |
| Fos      | 2.4588  | 1.9868  | 1.5712  | 1.0582  | -0.0218 | -0.0989 | -0.0686 | 0.1359  | 0.6456  | 0.5504  | Fos  |
| Ube2d1   | -0.002  | -0.0166 | 0.0248  | -0.0594 | -0.1743 | 0.033   | -0.0726 | 0.0002  | -0.0143 | -0.0804 | #N/A |
| Tab1     | 0.0204  | -0.0588 | -0.4691 | -0.1746 | -0.2109 | 0.0242  | -0.0741 | -0.1012 | -0.2682 | -0.3557 | #N/A |
| Bcl2l1   | 0.1575  | 0.1143  | 0.1523  | 0.3288  | 0.1028  | -0.0142 | -0.0925 | -0.2181 | -0.2148 | -0.1107 | #N/A |
| Ppp2ca   | 0.0028  | 0.1012  | 0.0332  | -0.1332 | -0.3209 | -0.1349 | -0.0966 | -0.0092 | -0.037  | -0.0101 | #N/A |
| Hsp90ab1 | 0.1452  | 0.1915  | 0.1437  | 0.2219  | 0.1322  | -0.0893 | -0.1023 | -0.0161 | 0.0487  | 0.06    | #N/A |
| Dusp6    | 0.2852  | 0.0684  | 0.0846  | -0.1344 | 0.1606  | -0.0168 | -0.1124 | -0.1518 | -0.0731 | 0.0294  | #N/A |
| Casp9    | -0.0077 | -0.0165 | -0.0406 | -0.1684 | -0.0434 | -0.2426 | -0.1139 | -0.2262 | -0.1792 | -0.1329 | #N/A |
| Ube2n    | 0.0071  | 0.0771  | -0.0056 | -0.0916 | -0.2677 | -0.1667 | -0.1201 | -0.0476 | -0.0426 | -0.0365 | #N/A |

|         |         |         |         |         |         |         |         |         |         |         |       |
|---------|---------|---------|---------|---------|---------|---------|---------|---------|---------|---------|-------|
| Map2k3  | -0.1252 | 0.2759  | 0.3875  | 0.5369  | 0.8267  | 0.2217  | -0.1426 | -0.15   | 0.0207  | -0.0016 | #N/A  |
| Irak1   | -0.011  | 0.4773  | 0.6934  | 0.576   | 0.8636  | -0.1045 | -0.1593 | -0.2922 | -0.2211 | -0.3241 | Irak1 |
| Map2k4  | -0.0167 | 0.0398  | -0.0493 | -0.1444 | -0.6289 | -0.2228 | -0.1645 | -0.045  | -0.071  | 0.0652  | #N/A  |
| Cd46    | -0.5373 | -0.3341 | -0.3544 | -0.2596 | -2.1734 | -0.6371 | -0.1649 | -0.6879 | -0.1469 | -0.69   | #N/A  |
| Cyld    | -0.1343 | -0.1095 | -0.184  | -0.3966 | -0.8756 | -0.3016 | -0.1826 | -0.1491 | -0.2131 | -0.1274 | #N/A  |
| Ube2k   | 0.0152  | -0.0019 | -0.0632 | -0.0639 | -0.1711 | -0.1697 | -0.2053 | -0.0569 | -0.0969 | -0.026  | #N/A  |
| C4a     | -0.1761 | -0.32   | -1.7687 | -0.4355 | 0.0396  | 0.4712  | -0.2118 | -0.0578 | -0.3605 | -0.7722 | #N/A  |
| Atf2    | 0.0018  | 0.054   | -0.0112 | -0.1484 | -0.5912 | -0.295  | -0.2118 | -0.1677 | -0.1137 | 0.6305  | #N/A  |
| Traf3   | -0.3491 | -0.0389 | 0.0388  | 0.0238  | -0.8428 | -0.4329 | -0.2161 | -0.1648 | -0.2263 | -0.2545 | #N/A  |
| Atg12   | 0.1462  | 0.3448  | 0.3386  | 0.1167  | -0.1761 | -0.1531 | -0.2171 | -0.086  | -0.132  | -0.0546 | #N/A  |
| C7      | -1.0077 | -1.3417 | -1.0371 | -0.7435 | -1.2269 | -0.6057 | -0.23   | -0.6633 | -0.3373 | -0.2829 | #N/A  |
| Rps6ka3 | -0.1186 | 0.0101  | -0.1307 | -0.1092 | -0.9259 | -0.3339 | -0.2499 | -0.2788 | -0.4023 | -0.3726 | #N/A  |
| Dnm1    | -0.0598 | -0.114  | -0.1535 | -0.3991 | -0.7595 | -0.2902 | -0.2606 | -0.1594 | -0.2487 | -0.0631 | #N/A  |
| Ppp2r5d | -0.0466 | 0.0086  | 0.1197  | -0.0684 | -0.1471 | -0.2798 | -0.2637 | -0.2815 | -0.2751 | -0.2769 | #N/A  |
| Map2k1  | -0.1139 | -0.1001 | -0.2468 | -0.3837 | -0.736  | -0.345  | -0.2725 | -0.1311 | -0.2228 | -0.1054 | #N/A  |
| Mapk1   | -0.1805 | -0.0473 | -0.2132 | -0.3447 | -1.0271 | -0.3584 | -0.2727 | -0.164  | -0.2736 | -0.0722 | #N/A  |
| Jun     | 1.116   | 1.0446  | 0.8176  | 0.4791  | 0.4077  | -0.0704 | -0.2784 | -0.4122 | -0.1534 | -0.2631 | Jun   |
| Otud5   | -0.0715 | -0.176  | -0.3575 | -0.2541 | -0.2461 | -0.2889 | -0.2878 | -0.2737 | -0.2255 | 0.0287  | #N/A  |
| Ppp2cb  | -0.0532 | 0.0524  | -0.0231 | -0.0878 | -0.263  | -0.1911 | -0.2912 | -0.1421 | -0.1146 | -0.1555 | #N/A  |
| Mef2c   | -0.1778 | -0.2429 | -0.5124 | -0.4464 | -0.4783 | -0.4376 | -0.2963 | -0.218  | -0.478  | -0.1717 | #N/A  |
| Tab3    | -0.0459 | 0.1331  | 0.0356  | -0.0891 | -0.9084 | -0.2809 | -0.3036 | -0.0809 | -0.2003 | -0.1276 | #N/A  |
| Mapk12  | 0.4246  | 0.4417  | 0.1622  | 0.3867  | 0.2142  | 0.0981  | -0.3061 | -0.2511 | -0.2783 | -0.0054 | #N/A  |
| Map2k6  | -0.0933 | 0.1424  | -0.1555 | -0.2702 | -0.4423 | -0.3508 | -0.3095 | -0.3434 | -0.2744 | -0.1537 | #N/A  |
| Ppp2r1a | 0.0095  | -0.0955 | -0.1653 | -0.1959 | -0.1258 | -0.3294 | -0.3143 | -0.1904 | -0.2024 | 0.366   | #N/A  |
| Mapk7   | -0.1141 | -0.4916 | -0.356  | -0.4    | -0.3558 | -0.21   | -0.3235 | -0.7307 | -0.4519 | -0.685  | #N/A  |
| Dusp3   | 0.0023  | -0.1417 | -0.2059 | -0.3316 | -0.3381 | -0.3722 | -0.3307 | -0.2563 | -0.3232 | -0.3031 | #N/A  |
| Mapk9   | -0.1145 | 0.0114  | -0.0391 | -0.2415 | -0.9632 | -0.4598 | -0.3323 | -0.1861 | -0.2601 | -0.1217 | #N/A  |
| Mapk8   | -0.1107 | -0.0251 | -0.0517 | -0.1647 | -0.7994 | -0.4392 | -0.3367 | -0.1929 | -0.2486 | -0.1566 | #N/A  |
| Mapk10  | -0.0941 | -0.0659 | -0.2269 | -0.3641 | -0.9084 | -0.4142 | -0.3594 | -0.2217 | -0.3394 | -0.1773 | #N/A  |
| Cd4     | -0.8405 | -1.0117 | -1.5877 | -2.9474 | -2.3622 | -0.6532 | -0.3728 | -0.9612 | -0.6964 | -1.0381 | Cd4   |
| Peli3   | -0.2325 | -0.2052 | -0.4316 | -0.4841 | -1.1847 | -0.4965 | -0.3794 | -0.3157 | -0.2048 | -0.1892 | #N/A  |
| Rps6ka2 | -0.0506 | -0.0266 | -0.1312 | -0.4052 | -0.99   | -0.473  | -0.3989 | -0.1938 | -0.4939 | -0.1782 | #N/A  |
| Dusp7   | -0.0696 | -0.3801 | -0.2508 | -0.1625 | -0.2161 | -0.394  | -0.4109 | -0.3768 | -0.4599 | -0.3703 | #N/A  |
| Ecsit   | -0.0253 | -0.1079 | -0.1259 | -0.09   | 0.0743  | -0.352  | -0.4162 | -0.3356 | -0.3388 | -0.3064 | #N/A  |
| Mapk13  | -0.2124 | -0.3695 | -0.8267 | -0.7288 | 0.1623  | -0.7952 | -0.4667 | -0.7964 | -1.6407 | -1.2509 | #N/A  |

|        |         |         |         |         |         |         |         |         |         |         |        |
|--------|---------|---------|---------|---------|---------|---------|---------|---------|---------|---------|--------|
| Pin1   | -0.2116 | -0.1149 | -0.3401 | -0.3291 | -0.1455 | -0.4423 | -0.4671 | -0.3621 | -0.3283 | -0.0608 | #N/A   |
| Defb1  | -0.2638 | 0.422   | 0.2893  | 0.6606  | 0.8523  | 0.3335  | -0.5667 | 0.1566  | 0.119   | 0.676   | #N/A   |
| Dusp4  | 0.2089  | 0.4835  | -0.0363 | -0.4074 | -1.021  | -0.7138 | -0.5705 | -0.0982 | -0.1838 | 0.0662  | #N/A   |
| Elk1   | -0.1769 | -0.1113 | -0.106  | 0.0172  | -0.5407 | -0.3889 | -0.6253 | -0.4808 | -0.6365 | -0.7399 | #N/A   |
| Mapk11 | -0.0843 | 0.0217  | -0.1368 | -0.5171 | -0.696  | -0.8661 | -0.7642 | -0.6157 | -0.8276 | -0.6019 | Mapk11 |

## Reference

1. Kim E, Tolhurst AT, Cho S. Deregulation of inflammatory response in the diabetic condition is associated with increased ischemic brain injury. *J Neuroinflammation*. 2014;11:83
2. Qin L, Jing D, Parada S, Carmel J, Ratan RR, Lee FS, et al. An adaptive role for bdnf val66met polymorphism in motor recovery in chronic stroke. *J Neurosci*. 2014;34:2493-2502
3. Love MI, Huber W, Anders S. Moderated estimation of fold change and dispersion for rna-seq data with deseq2. *Genome Biol*. 2014;15:550
4. Davies DL, Bouldin DW. A cluster separation measure. *IEEE Trans Pattern Anal Mach Intell*. 1979;1:224-227
5. MacQueen J. Some methods for classification and analysis of multivariate observations. *Proceedings of %th Berkeley Symposium on mathematical statistics and probability, Berkeley, University of California Press* 1967;1:281-297
6. Fabregat A, Jupe S, Matthews L, Sidiropoulos K, Gillespie M, Garapati P, et al. The reactome pathway knowledgebase. *Nucleic Acids Res*. 2018;46:D649-D655
7. Yang J, Balkaya M, Beltran C, Hoe Heo J, Cho S. Remote post-ischemic conditioning promotes stroke recovery by shifting circulating monocytes to ccr2+ pro-inflammatory subset. *J Neurosci*. 2019;39:7778-7789
8. Kim E, Yang J, Beltran CD, Cho S. Role of spleen-derived monocytes/macrophages in acute ischemic brain injury. *J Cereb Blood Flow Metab*. 2014;34:1411-1419
9. Chi J, Crane A, Wu Z, Cohen P. Adipo-clear: A tissue clearing method for three-dimensional imaging of adipose tissue. *J Vis Exp*. 2018;137:58271
10. Renier N, Adams EL, Kirst C, Wu Z, Azevedo R, Kohl J, et al. Mapping of brain activity by automated volume analysis of immediate early genes. *Cell*. 2016;165:1789-1802



## \* Preclinical Checklist

*Preclinical Checklist: Prevention of bias is important for experimental cardiovascular research. **This short checklist must be completed, and the answers should be clearly presented in the manuscript.** The checklist will be used by reviewers and editors and it will be published. See "[Reporting Standard for Preclinical Studies of Stroke Therapy](#)" and "[Good Laboratory Practice: Preventing Introduction of Bias at the Bench](#)" for more information.*

This study involves animal models:

Yes

### Experimental groups and study timeline

The experimental group(s) have been clearly defined in the article, including number of animals in each experimental arm of the study: Yes

An account of the control group is provided, and number of animals in the control group has been reported. If no controls were used, the rationale has been stated: Yes

An overall study timeline is provided: Yes

### Inclusion and exclusion criteria

A priori inclusion and exclusion criteria for tested animals were defined and have been reported in the article: Yes

### Randomization

Animals were randomly assigned to the experimental groups. If the work being submitted does not contain multiple experimental groups, or if random assignment was not used, adequate explanations have been provided: Yes

Type and methods of randomization have been described: Yes

Methods used for allocation concealment have been reported: N/A

### Blinding

Blinding procedures have been described with regard to masking of group/treatment assignment from the experimenter. The rationale for nonblinding of the experimenter has been provided, if such was not feasible: N/A

Blinding procedures have been described with regard to masking of group assignment during outcome assessment: N/A

### Sample size and power calculations

Formal sample size and power calculations were conducted based on a priori determined outcome(s) and treatment effect, and the data have been reported. A formal size assessment was not conducted and a rationale has been provided: Yes

### Data reporting and statistical methods

Number of animals in each group: randomized, tested, lost to follow-up, or died have been reported. If the experimentation involves repeated measurements, the number of animals assessed at each time point is provided, for all experimental groups: Yes

Baseline data on assessed outcome(s) for all experimental groups have been reported: Yes

Details on important adverse events and death of animals during the course of experimentation have been provided, for all experimental arms: Yes

Statistical methods used have been reported: Yes

Numeric data on outcomes have been provided in text, or in a tabular format with the main article or as supplementary tables, in addition to the figures: Yes

### Experimental details, ethics, and funding statements

Details on experimentation including stroke model, formulation and dosage of therapeutic agent, site and route of administration, use of anesthesia and analgesia, temperature control during experimentation, and postprocedural monitoring have been described: Yes

Different sex animals have been used. If not, the reason/justification is provided: Yes

Statements on approval by ethics boards and ethical conduct of studies have been provided: Yes

Statements on funding and conflicts of interests have been provided: Yes

---

Date completed: 04/28/2020 14:46:31

User pid: 35298
